# Supplementary material for: Transplantation of Human IPSC-derived Microglia Ameliorates Neuropathology and Circuit Dysfunction in Progranulin-Deficient Mice
Source: bioRxiv preprint, doi:10.64898/2026.01.13.699312, version 1 (2026-01-13)
Supplement: Supplementary Table S4 [file 699312_file05.xlsx]

## Sheet: TH EN markers
	p_val	avg_log2FC	pct.1	pct.2	p_val_adj	cluster	gene
mm10---Galntl6	0	1.41929	0.931	0.614	0	1	mm10---Galntl6
mm10---Unc5d	0	1.35202	0.804	0.525	0	1	mm10---Unc5d
mm10---Lrrc4c	0	1.3054	0.985	0.886	0	1	mm10---Lrrc4c
mm10---Asic2	0	1.23993	0.967	0.914	0	1	mm10---Asic2
mm10---Ephb1	0	1.23552	0.748	0.229	0	1	mm10---Ephb1
mm10---Erbb4	0	1.17404	0.669	0.317	0	1	mm10---Erbb4
mm10---Fstl5	0	1.15566	0.702	0.487	0	1	mm10---Fstl5
mm10---Nova1	0	1.13138	0.783	0.415	0	1	mm10---Nova1
mm10---Ntrk3	0	1.09287	0.887	0.437	0	1	mm10---Ntrk3
mm10---Nkain3	0	1.08663	0.683	0.299	0	1	mm10---Nkain3
mm10---B230217J21Rik	0	1.07374	0.591	0.168	0	1	mm10---B230217J21Rik
mm10---Pcdh15	0	1.07283	0.89	0.71	0	1	mm10---Pcdh15
mm10---Xkr6	0	1.0571	0.877	0.39	0	1	mm10---Xkr6
mm10---Rmst	0	1.04838	0.936	0.559	0	1	mm10---Rmst
mm10---4930555F03Rik	0	1.02137	0.694	0.385	0	1	mm10---4930555F03Rik
mm10---Rtn1	0	1.00145	0.994	0.942	0	1	mm10---Rtn1
mm10---Ryr2	0	0.962395	0.923	0.504	0	1	mm10---Ryr2
mm10---Traf3	0	0.962332	0.694	0.248	0	1	mm10---Traf3
mm10---Dgkb	0	0.960446	0.868	0.657	0	1	mm10---Dgkb
mm10---Samd4	0	0.94855	0.696	0.305	0	1	mm10---Samd4
mm10---Slit2	0	0.945029	0.48	0.176	0	1	mm10---Slit2
mm10---Ebf3	0	0.944853	0.424	0.071	0	1	mm10---Ebf3
mm10---Pbx3	0	0.943826	0.517	0.305	0	1	mm10---Pbx3
mm10---Nhs	0	0.929986	0.805	0.392	0	1	mm10---Nhs
mm10---Gm15398	0	0.929927	0.644	0.35	0	1	mm10---Gm15398
mm10---Resp18	0	0.918002	0.799	0.568	0	1	mm10---Resp18
mm10---Phactr1	0	0.915136	0.9	0.422	0	1	mm10---Phactr1
mm10---Hcn1	0	0.909709	0.641	0.26	0	1	mm10---Hcn1
mm10---Pcsk1n	0	0.907704	0.785	0.555	0	1	mm10---Pcsk1n
mm10---Mgat4c	0	0.903799	0.91	0.718	0	1	mm10---Mgat4c
mm10---6330411D24Rik	0	0.901057	0.701	0.462	0	1	mm10---6330411D24Rik
mm10---Tecr	0	0.896266	0.958	0.888	0	1	mm10---Tecr
mm10---Dab1	0	0.891578	0.958	0.541	0	1	mm10---Dab1
mm10---Klhl1	0	0.891128	0.509	0.15	0	1	mm10---Klhl1
mm10---Reln	0	0.887021	0.291	0.057	0	1	mm10---Reln
mm10---Nebl	0	0.886258	0.851	0.584	0	1	mm10---Nebl
mm10---Gm30382	0	0.882565	0.539	0.319	0	1	mm10---Gm30382
mm10---Cdh18	0	0.878811	0.944	0.899	0	1	mm10---Cdh18
mm10---Pde8b	0	0.869801	0.757	0.424	0	1	mm10---Pde8b
mm10---Tmem59l	0	0.858971	0.749	0.511	0	1	mm10---Tmem59l
mm10---Nrg1	0	0.858074	0.918	0.839	0	1	mm10---Nrg1
mm10---Gm45321	0	0.850913	0.573	0.293	0	1	mm10---Gm45321
mm10---C130073E24Rik	0	0.850306	0.729	0.465	0	1	mm10---C130073E24Rik
mm10---Syn3	0	0.84902	0.854	0.681	0	1	mm10---Syn3
mm10---Gm2516	0	0.841978	0.581	0.295	0	1	mm10---Gm2516
mm10---Dscaml1	0	0.832031	0.536	0.24	0	1	mm10---Dscaml1
mm10---Atp6v0c	0	0.829667	0.925	0.818	0	1	mm10---Atp6v0c
mm10---Dlgap2	0	0.826298	0.79	0.322	0	1	mm10---Dlgap2
mm10---Ube3a	0	0.825314	0.996	0.966	0	1	mm10---Ube3a
mm10---Ttc28	0	0.82379	0.677	0.398	0	1	mm10---Ttc28
mm10---Prkg1	0	0.813209	0.808	0.488	0	1	mm10---Prkg1
mm10---Slc9a9	0	0.811399	0.663	0.312	0	1	mm10---Slc9a9
mm10---Ssbp2	0	0.809037	0.826	0.655	0	1	mm10---Ssbp2
mm10---Ptprt	0	0.805937	0.683	0.392	0	1	mm10---Ptprt
mm10---Kcnip1	0	0.79171	0.718	0.307	0	1	mm10---Kcnip1
mm10---Csmd2	0	0.789257	0.866	0.542	0	1	mm10---Csmd2
mm10---Npas3	0	0.768032	0.773	0.766	0	1	mm10---Npas3
mm10---Mir99ahg	0	0.764593	0.938	0.856	0	1	mm10---Mir99ahg
mm10---Smyd3	0	0.764523	0.937	0.866	0	1	mm10---Smyd3
mm10---Atp8a1	0	0.755676	0.819	0.48	0	1	mm10---Atp8a1
mm10---Slc22a17	0	0.75206	0.872	0.753	0	1	mm10---Slc22a17
mm10---Mctp1	0	0.751209	0.675	0.33	0	1	mm10---Mctp1
mm10---Ctnna3	0	0.749917	0.937	0.82	0	1	mm10---Ctnna3
mm10---Caln1	0	0.74891	0.693	0.311	0	1	mm10---Caln1
mm10---Cdh9	0	0.74805	0.384	0.107	0	1	mm10---Cdh9
mm10---Bsg	0	0.74778	0.831	0.692	0	1	mm10---Bsg
mm10---Slc35f1	0	0.73692	0.892	0.799	0	1	mm10---Slc35f1
mm10---Zfp521	0	0.73646	0.49	0.302	0	1	mm10---Zfp521
mm10---Gm11418	0	0.732861	0.475	0.139	0	1	mm10---Gm11418
mm10---Scg5	0	0.732495	0.941	0.907	0	1	mm10---Scg5
mm10---Dlg2	0	0.731645	0.999	0.998	0	1	mm10---Dlg2
mm10---Chl1	0	0.730277	0.732	0.522	0	1	mm10---Chl1
mm10---Syt2	0	0.729854	0.477	0.234	0	1	mm10---Syt2
mm10---Ahi1	0	0.725586	0.995	0.973	0	1	mm10---Ahi1
mm10---Frmpd3	0	0.725474	0.515	0.185	0	1	mm10---Frmpd3
mm10---Ankrd55	0	0.723528	0.619	0.346	0	1	mm10---Ankrd55
mm10---Dgkg	0	0.71908	0.56	0.218	0	1	mm10---Dgkg
mm10---Pdzrn4	0	0.71897	0.808	0.472	0	1	mm10---Pdzrn4
mm10---Ly6h	0	0.71321	0.718	0.473	0	1	mm10---Ly6h
mm10---Sgcz	0	0.7106	0.963	0.871	0	1	mm10---Sgcz
mm10---Slc35f4	0	0.706223	0.691	0.4	0	1	mm10---Slc35f4
mm10---Zbtb20	0	0.705424	0.873	0.707	0	1	mm10---Zbtb20
mm10---Htr4	0	0.702887	0.471	0.139	0	1	mm10---Htr4
mm10---Ctsb	0	0.702451	0.657	0.473	0	1	mm10---Ctsb
mm10---Cntnap5a	0	0.702368	0.9	0.751	0	1	mm10---Cntnap5a
mm10---Tmem130	0	0.701091	0.764	0.596	0	1	mm10---Tmem130
mm10---Snrpn	0	0.700521	0.843	0.787	0	1	mm10---Snrpn
mm10---L3mbtl4	0	0.69803	0.342	0.1	0	1	mm10---L3mbtl4
mm10---Rerg	0	0.695532	0.426	0.117	0	1	mm10---Rerg
mm10---Prex2	0	0.693452	0.383	0.095	0	1	mm10---Prex2
mm10---Airn	0	0.688429	0.565	0.377	0	1	mm10---Airn
mm10---Ncam2	0	0.681362	0.961	0.749	0	1	mm10---Ncam2
mm10---Me3	0	0.678963	0.618	0.335	0	1	mm10---Me3
mm10---Grid2	0	0.674489	0.983	0.963	0	1	mm10---Grid2
mm10---Stxbp5l	0	0.670709	0.906	0.745	0	1	mm10---Stxbp5l
mm10---Epb41l1	0	0.667445	0.708	0.441	0	1	mm10---Epb41l1
mm10---Dcc	0	0.66577	0.931	0.789	0	1	mm10---Dcc
mm10---Arl6ip1	0	0.665714	0.692	0.56	0	1	mm10---Arl6ip1
mm10---4930445B16Rik	0	0.661545	0.44	0.182	0	1	mm10---4930445B16Rik
mm10---A330102I10Rik	0	0.659551	0.797	0.671	0	1	mm10---A330102I10Rik
mm10---Dmd	0	0.635379	0.965	0.855	0	1	mm10---Dmd
mm10---8030451O07Rik	0	0.634144	0.42	0.139	0	1	mm10---8030451O07Rik
mm10---Acp1	0	0.631999	0.738	0.604	0	1	mm10---Acp1
mm10---Sparcl1	0	0.629189	0.587	0.454	0	1	mm10---Sparcl1
mm10---Lrrtm4	0	0.625671	0.975	0.841	0	1	mm10---Lrrtm4
mm10---Itm2b	0	0.623203	0.89	0.846	0	1	mm10---Itm2b
mm10---Caly	0	0.619957	0.666	0.559	0	1	mm10---Caly
mm10---P2ry14	0	0.618537	0.811	0.702	0	1	mm10---P2ry14
mm10---Tspan7	0	0.617039	0.876	0.817	0	1	mm10---Tspan7
mm10---Cacna2d2	0	0.597684	0.646	0.403	0	1	mm10---Cacna2d2
mm10---Tmx4	0	0.591932	0.766	0.666	0	1	mm10---Tmx4
mm10---5330438D12Rik	0	0.591068	0.834	0.7	0	1	mm10---5330438D12Rik
mm10---Srgap3	0	0.587477	0.849	0.7	0	1	mm10---Srgap3
mm10---Scn9a	0	0.584803	0.764	0.664	0	1	mm10---Scn9a
mm10---Arhgap18	0	0.580514	0.704	0.591	0	1	mm10---Arhgap18
mm10---Sybu	0	0.577059	0.915	0.876	0	1	mm10---Sybu
mm10---Cplane1	0	0.57258	0.944	0.939	0	1	mm10---Cplane1
mm10---Gaa	0	0.571598	0.619	0.47	0	1	mm10---Gaa
mm10---Cep70	0	0.565553	0.678	0.574	0	1	mm10---Cep70
mm10---Gria2	0	0.562578	0.987	0.985	0	1	mm10---Gria2
mm10---Faim2	0	0.560759	0.739	0.67	0	1	mm10---Faim2
mm10---Gm37240	0	0.559188	0.693	0.583	0	1	mm10---Gm37240
mm10---AC149090.1	0	0.55581	0.961	0.953	0	1	mm10---AC149090.1
mm10---Usp29	0	0.54944	0.957	0.93	0	1	mm10---Usp29
mm10---Gm28198	0	0.547258	0.601	0.468	0	1	mm10---Gm28198
mm10---Rgs6	0	0.545381	0.752	0.439	0	1	mm10---Rgs6
mm10---Csmd3	0	0.54502	0.991	0.983	0	1	mm10---Csmd3
mm10---Chga	0	0.54447	0.704	0.625	0	1	mm10---Chga
mm10---Ate1	0	0.536736	0.608	0.476	0	1	mm10---Ate1
mm10---5530401A14Rik	0	0.530958	0.367	0.111	0	1	mm10---5530401A14Rik
mm10---A230057D06Rik	0	0.526921	0.975	0.97	0	1	mm10---A230057D06Rik
mm10---4632427E13Rik	0	0.526355	0.767	0.689	0	1	mm10---4632427E13Rik
mm10---Psap	0	0.519514	0.825	0.79	0	1	mm10---Psap
mm10---Ncam1	0	0.509666	0.973	0.943	0	1	mm10---Ncam1
mm10---Atp6v0b	0	0.503153	0.914	0.882	0	1	mm10---Atp6v0b
mm10---Zcchc18	0	0.495158	0.794	0.762	0	1	mm10---Zcchc18
mm10---Epb41	0	0.49486	0.745	0.694	0	1	mm10---Epb41
mm10---Fgfr2	0	0.494491	0.93	0.875	0	1	mm10---Fgfr2
mm10---Rnpc3	0	0.482458	0.8	0.77	0	1	mm10---Rnpc3
mm10---Camk2g	0	0.479111	0.588	0.48	0	1	mm10---Camk2g
mm10---Dpm1	0	0.462054	0.743	0.709	0	1	mm10---Dpm1
mm10---Prpf4b	0	0.456981	0.9	0.899	0	1	mm10---Prpf4b
mm10---Osbpl9	0	0.4534	0.931	0.921	0	1	mm10---Osbpl9
mm10---Limch1	0	0.446573	0.866	0.848	0	1	mm10---Limch1
mm10---Ankrd24	0	0.440947	0.748	0.734	0	1	mm10---Ankrd24
mm10---Vwa5b2	0	0.437894	0.669	0.626	0	1	mm10---Vwa5b2
mm10---Rtn3	0	0.418073	0.976	0.979	0	1	mm10---Rtn3
mm10---Pcdh7	4.94065645841247e-324	0.647721	0.921	0.893	1.32409593085454e-319	1	mm10---Pcdh7
mm10---Clu	4.94065645841247e-324	0.563774	0.459	0.252	1.32409593085454e-319	1	mm10---Clu
mm10---Ntm	9.88131291682493e-324	0.543761	0.983	0.971	2.64819186170908e-319	1	mm10---Ntm
mm10---Stx16	2.47032822920623e-323	0.441792	0.736	0.7	6.6204796542727e-319	1	mm10---Stx16
mm10---Htr2c	2.96439387504748e-323	0.836437	0.769	0.573	7.94457558512724e-319	1	mm10---Htr2c
mm10---Ano3	1.32903658731295e-321	0.552561	0.476	0.189	3.56181805399871e-317	1	mm10---Ano3
mm10---Slc12a5	6.2955820855675e-319	0.422856	0.791	0.785	1.68721599893209e-314	1	mm10---Slc12a5
mm10---Zfp692	1.34711099083476e-317	0.45788	0.614	0.547	3.61025745543717e-313	1	mm10---Zfp692
mm10---Kcnh1	2.48437253925492e-317	0.595576	0.385	0.131	6.65811840520317e-313	1	mm10---Kcnh1
mm10---Wscd2	5.02506263334798e-317	0.568257	0.439	0.176	1.34671678573726e-312	1	mm10---Wscd2
mm10---Ubap1l	5.04970287286364e-316	0.497239	0.463	0.285	1.35332036992745e-311	1	mm10---Ubap1l
mm10---Tmem59	1.49871278626246e-315	0.458441	0.678	0.622	4.0165502671834e-311	1	mm10---Tmem59
mm10---Kif26b	1.51900873125751e-315	0.540181	0.681	0.576	4.07094339977014e-311	1	mm10---Kif26b
mm10---Gabrg2	4.27075199349462e-314	0.429901	0.703	0.679	1.14456153425656e-309	1	mm10---Gabrg2
mm10---Cd81	5.89314087689022e-313	0.579512	0.688	0.575	1.57936175500658e-308	1	mm10---Cd81
mm10---Klhl32	6.74665291387187e-313	0.392114	0.64	0.617	1.80810298091766e-308	1	mm10---Klhl32
mm10---Pcdh17	3.02909211596636e-312	0.690277	0.615	0.398	8.11796687078984e-308	1	mm10---Pcdh17
mm10---Emc10	2.22499339457815e-311	0.517588	0.6	0.454	5.96298229746945e-307	1	mm10---Emc10
mm10---Rabac1	9.71003173205984e-311	0.555085	0.598	0.467	2.60228850419204e-306	1	mm10---Rabac1
mm10---Alcam	1.04199043514523e-310	0.793442	0.602	0.315	2.79253436618922e-306	1	mm10---Alcam
mm10---Tmem181a	6.10339606150279e-310	0.51198	0.588	0.428	1.63571014448275e-305	1	mm10---Tmem181a
mm10---Il1rapl2	1.56412646348415e-309	1.33142	0.468	0.243	4.19185892213751e-305	1	mm10---Il1rapl2
mm10---Gm40841	3.53378910243918e-309	0.422757	0.706	0.694	9.47055479453701e-305	1	mm10---Gm40841
mm10---Man1a	1.24964849055869e-308	0.730734	0.444	0.174	3.34905795469728e-304	1	mm10---Man1a
mm10---Aff2	2.81823036503131e-307	0.578981	0.708	0.585	7.55285737828391e-303	1	mm10---Aff2
mm10---Dip2c	1.53097978566217e-306	0.413344	0.939	0.933	4.10302582557462e-302	1	mm10---Dip2c
mm10---Mblac2	3.07805869600833e-305	0.401648	0.606	0.563	8.24919730530233e-301	1	mm10---Mblac2
mm10---Mir100hg	9.30396509562095e-305	0.49323	0.935	0.902	2.49346264562641e-300	1	mm10---Mir100hg
mm10---Pkia	1.28461083980218e-304	0.462616	0.71	0.643	3.44275705066985e-300	1	mm10---Pkia
mm10---Afdn	1.9018489599369e-302	0.4818	0.664	0.54	5.09695521263089e-298	1	mm10---Afdn
mm10---Serpini1	4.20772948554252e-302	0.655341	0.5	0.27	1.12767150212539e-297	1	mm10---Serpini1
mm10---D830024N08Rik	7.99715186417257e-302	0.532708	0.624	0.484	2.14323669959825e-297	1	mm10---D830024N08Rik
mm10---Rapgef6	7.2080060158507e-301	0.394593	0.847	0.854	1.93174561224799e-296	1	mm10---Rapgef6
mm10---Gnas	3.07246693764587e-300	0.472046	0.809	0.808	8.23421139289092e-296	1	mm10---Gnas
mm10---Gm17276	2.17945464805027e-299	0.446078	0.582	0.498	5.84093845677473e-295	1	mm10---Gm17276
mm10---Rbm39	4.57679306541457e-298	0.40451	0.981	0.984	1.22658054153111e-293	1	mm10---Rbm39
mm10---Stard5	6.9996373668737e-298	0.546595	0.386	0.201	1.87590281432215e-293	1	mm10---Stard5
mm10---Tmem191c	1.26566159986672e-297	0.425118	0.733	0.717	3.39197308764282e-293	1	mm10---Tmem191c
mm10---Thoc1	6.39984588770698e-296	0.366597	0.732	0.728	1.71515869790547e-291	1	mm10---Thoc1
mm10---Gm32509	1.09370612229267e-295	0.520817	0.81	0.737	2.93113240774437e-291	1	mm10---Gm32509
mm10---Tro	4.94700605619245e-293	0.397228	0.701	0.694	1.32579762305958e-288	1	mm10---Tro
mm10---Hspa5	1.56986383523804e-291	0.523235	0.605	0.49	4.20723507843794e-287	1	mm10---Hspa5
mm10---Rgl1	2.53972156735883e-291	0.450183	0.541	0.437	6.80645380052166e-287	1	mm10---Rgl1
mm10---Sms	1.15353235195736e-290	0.408761	0.572	0.513	3.09146670324572e-286	1	mm10---Sms
mm10---Gm48893	1.55808400958873e-290	0.501797	0.449	0.279	4.17566514569779e-286	1	mm10---Gm48893
mm10---2610035D17Rik	1.02145775140982e-289	0.537571	0.52	0.293	2.73750677377831e-285	1	mm10---2610035D17Rik
mm10---Galnt13	1.56792167329874e-289	0.473306	0.914	0.797	4.20203008444061e-285	1	mm10---Galnt13
mm10---Trerf1	1.69353126685664e-289	0.500772	0.797	0.706	4.5386637951758e-285	1	mm10---Trerf1
mm10---Matk	4.99238072366723e-289	0.46482	0.725	0.656	1.33795803394282e-284	1	mm10---Matk
mm10---Drg1	4.96173090801698e-288	0.420232	0.698	0.657	1.32974388334855e-283	1	mm10---Drg1
mm10---E130307A14Rik	4.78069093153032e-286	0.425775	0.752	0.728	1.28122516965013e-281	1	mm10---E130307A14Rik
mm10---Cog5	7.19682780824113e-286	0.350151	0.692	0.704	1.92874985260862e-281	1	mm10---Cog5
mm10---Tenm2	8.56166156719707e-286	0.597403	0.989	0.978	2.29452530000881e-281	1	mm10---Tenm2
mm10---Zfp612	1.22583139752589e-284	0.427937	0.555	0.464	3.28522814536938e-280	1	mm10---Zfp612
mm10---Igsf8	3.49384767534233e-281	0.438639	0.566	0.506	9.36351176991745e-277	1	mm10---Igsf8
mm10---Dach1	1.06539379824254e-280	0.937205	0.331	0.109	2.85525537929001e-276	1	mm10---Dach1
mm10---Adcy2	2.95294186249981e-280	0.702174	0.567	0.302	7.91388419149949e-276	1	mm10---Adcy2
mm10---Rasgrf2	1.36294207485902e-279	0.578258	0.513	0.251	3.65268476062216e-275	1	mm10---Rasgrf2
mm10---Lrpap1	3.89014738133539e-279	0.49786	0.539	0.435	1.04255949819789e-274	1	mm10---Lrpap1
mm10---Rp9	9.37460847090208e-279	0.405595	0.578	0.522	2.51239507020176e-274	1	mm10---Rp9
mm10---Atp1b1	9.8450490998081e-278	0.465947	0.929	0.925	2.63847315874857e-273	1	mm10---Atp1b1
mm10---9530026P05Rik	2.5722285111326e-277	0.84097	0.339	0.128	6.89357240983536e-273	1	mm10---9530026P05Rik
mm10---4930517O19Rik	8.1031880707485e-277	0.476444	0.586	0.5	2.1716544029606e-272	1	mm10---4930517O19Rik
mm10---Gm32250	4.14515526500237e-276	0.47158	0.768	0.669	1.11090161102064e-271	1	mm10---Gm32250
mm10---Atp1a3	8.38752710027626e-275	0.393574	0.944	0.953	2.24785726287404e-270	1	mm10---Atp1a3
mm10---Kctd8	2.51801681852181e-272	0.60059	0.532	0.265	6.74828507363845e-268	1	mm10---Kctd8
mm10---Ppp2r3a	1.16428934548692e-271	0.41794	0.735	0.687	3.12029544590496e-267	1	mm10---Ppp2r3a
mm10---Pgrmc1	7.34680135618032e-271	0.564633	0.486	0.312	1.96894276345632e-266	1	mm10---Pgrmc1
mm10---6330403K07Rik	5.35403085415172e-270	0.548253	0.415	0.179	1.43488026891266e-265	1	mm10---6330403K07Rik
mm10---Kcnt1	3.88492096536488e-269	0.39772	0.548	0.47	1.04115881871779e-264	1	mm10---Kcnt1
mm10---Hnrnph3	1.00908505734072e-268	0.380492	0.656	0.623	2.70434795367312e-264	1	mm10---Hnrnph3
mm10---3110021N24Rik	1.88684322259263e-266	0.444748	0.641	0.55	5.05673983654824e-262	1	mm10---3110021N24Rik
mm10---Scg2	1.17326408980868e-265	0.649155	0.72	0.593	3.14434776068725e-261	1	mm10---Scg2
mm10---Cacna1e	1.06737765179755e-264	0.449877	0.783	0.521	2.86057210681742e-260	1	mm10---Cacna1e
mm10---Srsf7	1.16445058554214e-264	0.406019	0.833	0.833	3.12072756925294e-260	1	mm10---Srsf7
mm10---Snhg11	1.07072097802736e-263	0.287807	1	0.998	2.86953222111334e-259	1	mm10---Snhg11
mm10---Bscl2	4.9628734775968e-263	0.433656	0.506	0.399	1.33005009199594e-258	1	mm10---Bscl2
mm10---1700025G04Rik	4.30832448086972e-260	0.381401	0.647	0.618	1.15463096087308e-255	1	mm10---1700025G04Rik
mm10---Npdc1	1.87646448852333e-259	0.363795	0.519	0.485	5.02892482924253e-255	1	mm10---Npdc1
mm10---A330076H08Rik	3.57688070507691e-259	0.378398	0.887	0.888	9.58604028960613e-255	1	mm10---A330076H08Rik
mm10---Ywhag	5.20360781942786e-259	0.335726	0.716	0.732	1.39456689560667e-254	1	mm10---Ywhag
mm10---Canx	6.18293186930998e-259	0.38979	0.668	0.649	1.65702574097507e-254	1	mm10---Canx
mm10---Saraf	8.3637569418587e-259	0.460306	0.577	0.487	2.24148686041813e-254	1	mm10---Saraf
mm10---Glrb	1.45592915747144e-258	0.332092	0.67	0.673	3.90189014202346e-254	1	mm10---Glrb
mm10---Disp2	8.88326498438922e-258	0.387011	0.622	0.573	2.38071501581631e-253	1	mm10---Disp2
mm10---Slc7a6	2.7339382392012e-257	0.329584	0.539	0.524	7.32695448105923e-253	1	mm10---Slc7a6
mm10---Rundc3b	2.97739787210858e-257	0.310337	0.604	0.605	7.979426297251e-253	1	mm10---Rundc3b
mm10---Tfap2d	6.01200922077362e-257	0.498611	0.255	0.062	1.61121847116733e-252	1	mm10---Tfap2d
mm10---Serinc1	8.88395060634729e-257	0.421691	0.724	0.702	2.38089876250107e-252	1	mm10---Serinc1
mm10---Prune2	9.51678095350599e-257	0.254427	0.483	0.526	2.55049729553961e-252	1	mm10---Prune2
mm10---Baiap3	2.68397444581076e-256	0.657678	0.333	0.114	7.19305151477285e-252	1	mm10---Baiap3
mm10---Tmem145	9.61673973029393e-256	0.441422	0.476	0.343	2.57728624771877e-251	1	mm10---Tmem145
mm10---Fgfr1	1.12858983022268e-255	0.429172	0.349	0.186	3.02462074499679e-251	1	mm10---Fgfr1
mm10---Rnf121	1.34626504000813e-255	0.424636	0.566	0.533	3.6079903072218e-251	1	mm10---Rnf121
mm10---Zmiz1	3.0313254392046e-255	0.4709	0.426	0.278	8.12395217706833e-251	1	mm10---Zmiz1
mm10---Gm20275	4.59665450997595e-255	0.471377	0.717	0.6	1.23190340867355e-250	1	mm10---Gm20275
mm10---Stim1	1.9839510123357e-254	0.371922	0.61	0.586	5.31698871305967e-250	1	mm10---Stim1
mm10---Rev3l	2.41938953445255e-254	0.335506	0.799	0.82	6.48396395233284e-250	1	mm10---Rev3l
mm10---Tspan3	4.51274919632616e-254	0.384402	0.596	0.558	1.20941678461541e-249	1	mm10---Tspan3
mm10---Gm26917	6.80139513031549e-253	0.281738	0.625	0.676	1.82277389492455e-248	1	mm10---Gm26917
mm10---Nrsn2	2.92733467972035e-252	0.454003	0.41	0.294	7.84525694165053e-248	1	mm10---Nrsn2
mm10---Stmn3	6.44461915408218e-252	0.382792	0.814	0.822	1.72715793329402e-247	1	mm10---Stmn3
mm10---Luzp2	1.06112837614117e-251	0.720414	0.693	0.465	2.84382404805835e-247	1	mm10---Luzp2
mm10---Ago3	1.19867793743125e-251	0.319467	0.826	0.857	3.21245687231574e-247	1	mm10---Ago3
mm10---Syt4	1.54402929395696e-251	0.488656	0.573	0.491	4.13799850780465e-247	1	mm10---Syt4
mm10---Rab27b	4.01953619498817e-251	0.525168	0.431	0.219	1.07723570025683e-246	1	mm10---Rab27b
mm10---H2-D1	4.30033708650584e-251	0.457037	0.317	0.137	1.15249033918356e-246	1	mm10---H2-D1
mm10---Lynx1	1.93944703430144e-250	0.392761	0.616	0.557	5.19771805192786e-246	1	mm10---Lynx1
mm10---Nsg1	5.62239329353225e-250	0.351697	0.54	0.521	1.50680140266664e-245	1	mm10---Nsg1
mm10---Nap1l5	3.72592711358214e-249	0.438854	0.53	0.451	9.98548466440012e-245	1	mm10---Nap1l5
mm10---4933406I18Rik	4.55494154104478e-249	0.376756	0.643	0.622	1.220724333e-244	1	mm10---4933406I18Rik
mm10---A530058N18Rik	1.46942613237852e-248	0.444334	0.462	0.319	3.93806203477442e-244	1	mm10---A530058N18Rik
mm10---Rnf25	1.80835142040945e-248	0.343514	0.481	0.426	4.84638180669733e-244	1	mm10---Rnf25
mm10---Stk38	2.37113276530803e-248	0.301113	0.729	0.763	6.35463581102552e-244	1	mm10---Stk38
mm10---Pvt1	2.9533815359262e-248	0.468964	0.578	0.485	7.91506251628222e-244	1	mm10---Pvt1
mm10---Ddx24	1.10295570405656e-247	0.325331	0.731	0.755	2.95592128687159e-243	1	mm10---Ddx24
mm10---Sec62	1.84276198360719e-247	0.331583	0.65	0.676	4.93860211606727e-243	1	mm10---Sec62
mm10---Tulp4	1.89048168092358e-246	0.428948	0.753	0.675	5.0664909048752e-242	1	mm10---Tulp4
mm10---Ccdc47	3.69383425093985e-246	0.322739	0.574	0.566	9.89947579251879e-242	1	mm10---Ccdc47
mm10---Slc25a36	4.82009902596269e-245	0.272575	0.603	0.633	1.291786538958e-240	1	mm10---Slc25a36
mm10---Igf2bp3	1.05919832206183e-243	0.411438	0.568	0.482	2.83865150312571e-239	1	mm10---Igf2bp3
mm10---Bend6	2.0021585932471e-243	0.34548	0.76	0.776	5.36578502990224e-239	1	mm10---Bend6
mm10---C130071C03Rik	1.08299542452609e-242	0.4119	0.542	0.519	2.90242773772992e-238	1	mm10---C130071C03Rik
mm10---Tusc3	3.84098870926363e-242	0.386001	0.684	0.65	1.02938497408265e-237	1	mm10---Tusc3
mm10---Tra2a	4.54617979030912e-242	0.318607	0.839	0.864	1.21837618380284e-237	1	mm10---Tra2a
mm10---Gpc6	1.71182801793028e-241	0.718424	0.75	0.523	4.58769908805316e-237	1	mm10---Gpc6
mm10---Tm2d3	3.64436092191334e-241	0.46882	0.414	0.271	9.76688727072775e-237	1	mm10---Tm2d3
mm10---Gm15155	1.06275310818637e-240	0.646152	0.605	0.412	2.84817832993946e-236	1	mm10---Gm15155
mm10---Lmo3	2.14699014025581e-240	0.559161	0.31	0.101	5.75393357588557e-236	1	mm10---Lmo3
mm10---Frmd3	5.79332267458875e-240	0.460134	0.609	0.484	1.55261047678978e-235	1	mm10---Frmd3
mm10---Lmbrd1	8.46581727855624e-240	0.234491	0.573	0.63	2.26883903065307e-235	1	mm10---Lmbrd1
mm10---Dennd6b	2.34841408327103e-239	0.281127	0.524	0.529	6.29374974316636e-235	1	mm10---Dennd6b
mm10---Elmod1	3.46885065516618e-239	0.469538	0.773	0.669	9.29651975584536e-235	1	mm10---Elmod1
mm10---Erlec1	4.17742144969126e-239	0.29548	0.526	0.537	1.11954894851726e-234	1	mm10---Erlec1
mm10---Grik4	5.0892527545991e-239	0.538986	0.675	0.479	1.36391973823256e-234	1	mm10---Grik4
mm10---Igf2r	2.24550294400047e-238	0.358953	0.37	0.293	6.01794788992127e-234	1	mm10---Igf2r
mm10---Gm44151	1.12891810971229e-237	0.510592	0.487	0.268	3.02550053402892e-233	1	mm10---Gm44151
mm10---Prepl	2.82386541938068e-237	0.171267	0.52	0.593	7.56795932394022e-233	1	mm10---Prepl
mm10---Psma1	3.11582684797444e-237	0.338569	0.586	0.56	8.35041595257149e-233	1	mm10---Psma1
mm10---1600010M07Rik	1.17665109061477e-236	0.404692	0.489	0.393	3.15342492284758e-232	1	mm10---1600010M07Rik
mm10---Fbxl2	1.29252435935663e-236	0.283001	0.642	0.668	3.46396528307576e-232	1	mm10---Fbxl2
mm10---A830018L16Rik	1.4682266691425e-236	0.53861	0.705	0.462	3.9348474733019e-232	1	mm10---A830018L16Rik
mm10---Atp6ap1	1.89097200685291e-236	0.318283	0.503	0.489	5.0678049783658e-232	1	mm10---Atp6ap1
mm10---Zmynd11	2.49933113054e-236	0.257515	0.705	0.756	6.69820742984719e-232	1	mm10---Zmynd11
mm10---Gphn	2.81469583674251e-236	0.343294	0.978	0.983	7.54338484246993e-232	1	mm10---Gphn
mm10---Plcb1	4.62894206051557e-236	0.473898	0.776	0.548	1.24055647221817e-231	1	mm10---Plcb1
mm10---Cadm1	8.72393080434726e-236	0.521029	0.882	0.829	2.33801345556507e-231	1	mm10---Cadm1
mm10---Ndufaf7	1.33613533447667e-235	0.354916	0.559	0.522	3.58084269639749e-231	1	mm10---Ndufaf7
mm10---Gm36975	2.36834041672581e-235	0.457798	0.687	0.585	6.34715231682518e-231	1	mm10---Gm36975
mm10---Epha5	8.69309811590616e-235	0.513615	0.831	0.778	2.32975029506285e-230	1	mm10---Epha5
mm10---Ankfn1	1.94591459674856e-234	0.594985	0.341	0.123	5.21505111928614e-230	1	mm10---Ankfn1
mm10---Aplp1	9.69740902510698e-234	0.478766	0.669	0.549	2.59890561872867e-229	1	mm10---Aplp1
mm10---Lnpk	1.31976055785253e-233	0.281522	0.579	0.591	3.53695829504479e-229	1	mm10---Lnpk
mm10---Tmx2	1.68016540219175e-233	0.336343	0.493	0.463	4.5028432778739e-229	1	mm10---Tmx2
mm10---Mmp16	3.53625864839196e-233	0.412374	0.826	0.815	9.47717317769045e-229	1	mm10---Mmp16
mm10---Grina	4.31997615979001e-233	0.315774	0.673	0.689	1.15775361082372e-228	1	mm10---Grina
mm10---Paip2	1.26367028724607e-232	0.270794	0.693	0.732	3.38663636981946e-228	1	mm10---Paip2
mm10---Nfatc3	2.94132681219252e-232	0.285406	0.509	0.512	7.88275585667595e-228	1	mm10---Nfatc3
mm10---5031439G07Rik	7.16372686515958e-232	0.243666	0.572	0.617	1.91987879986277e-227	1	mm10---5031439G07Rik
mm10---Sclt1	1.01938327938683e-231	0.300989	0.782	0.815	2.73194718875672e-227	1	mm10---Sclt1
mm10---Pld5	2.95031891296921e-231	0.562718	0.439	0.198	7.90685468675749e-227	1	mm10---Pld5
mm10---Zkscan16	4.96422176775833e-231	0.450796	0.478	0.331	1.33041143375923e-226	1	mm10---Zkscan16
mm10---Ccdc174	7.50532244542968e-231	0.250398	0.523	0.551	2.01142641537515e-226	1	mm10---Ccdc174
mm10---Haghl	1.2226183051625e-230	0.289916	0.515	0.513	3.2766170578355e-226	1	mm10---Haghl
mm10---Scmh1	1.33140301022175e-230	0.327446	0.813	0.826	3.56816006739429e-226	1	mm10---Scmh1
mm10---Zfp398	1.58755802821188e-230	0.267272	0.54	0.562	4.25465551560784e-226	1	mm10---Zfp398
mm10---Trpc5	2.61021492388711e-230	0.619954	0.507	0.338	6.99537599601745e-226	1	mm10---Trpc5
mm10---Cdc7	4.34029622658439e-230	0.418083	0.377	0.231	1.16319938872462e-225	1	mm10---Cdc7
mm10---Immp1l	4.93488333684882e-230	0.369173	0.656	0.626	1.32254873427548e-225	1	mm10---Immp1l
mm10---Ccser1	5.13640816661504e-230	0.37138	0.989	0.99	1.37655738865283e-225	1	mm10---Ccser1
mm10---Cst3	6.47509545363064e-230	0.474668	0.553	0.475	1.73532558157301e-225	1	mm10---Cst3
mm10---Gpm6a	6.6594751275222e-230	0.427375	0.878	0.847	1.78473933417595e-225	1	mm10---Gpm6a
mm10---Shfl	6.72323410241986e-230	0.319583	0.496	0.46	1.80182673944852e-225	1	mm10---Shfl
mm10---Pex13	7.26416389160655e-229	0.31385	0.508	0.481	1.94679592295055e-224	1	mm10---Pex13
mm10---Zbtb11	9.46364673421911e-229	0.265675	0.594	0.634	2.53625732477072e-224	1	mm10---Zbtb11
mm10---Sqstm1	1.14876609240088e-228	0.323394	0.573	0.558	3.07869312763435e-224	1	mm10---Sqstm1
mm10---Ebf1	5.73702822699305e-228	0.855999	0.596	0.437	1.53752356483414e-223	1	mm10---Ebf1
mm10---Dennd5b	5.74129639374019e-228	0.296375	0.81	0.847	1.53866743352237e-223	1	mm10---Dennd5b
mm10---Pspc1	1.29622119994903e-227	0.217677	0.571	0.624	3.4738728158634e-223	1	mm10---Pspc1
mm10---Cep112	2.71019358743919e-227	0.704658	0.705	0.518	7.26331881433703e-223	1	mm10---Cep112
mm10---Tmem126a	5.6648135977955e-227	0.410042	0.54	0.457	1.51817004420919e-222	1	mm10---Tmem126a
mm10---Wsb1	8.54929223246492e-227	0.323181	0.58	0.563	2.2912103183006e-222	1	mm10---Wsb1
mm10---Hacd3	1.20081183531554e-226	0.288344	0.602	0.61	3.21817571864565e-222	1	mm10---Hacd3
mm10---Srrm1	5.77977028445179e-226	0.239426	0.752	0.816	1.54897843623308e-221	1	mm10---Srrm1
mm10---Gmds	7.64381821671639e-225	0.329993	0.779	0.79	2.04854328207999e-220	1	mm10---Gmds
mm10---Clgn	1.61541184298982e-224	0.349774	0.399	0.324	4.32930373921272e-220	1	mm10---Clgn
mm10---Atad1	2.71162717142612e-224	0.222729	0.553	0.601	7.267160819422e-220	1	mm10---Atad1
mm10---Mtf2	6.73369633067509e-224	0.203496	0.621	0.685	1.80463061662092e-219	1	mm10---Mtf2
mm10---Srsf10	2.18679509333342e-223	0.330848	0.516	0.488	5.86061085013357e-219	1	mm10---Srsf10
mm10---Pde4b	5.22194902776231e-223	0.221631	0.9	0.695	1.3994823394403e-218	1	mm10---Pde4b
mm10---Sod2	9.57210278093452e-223	0.210436	0.549	0.602	2.56532354529045e-218	1	mm10---Sod2
mm10---Ophn1	1.26732318283846e-222	0.245562	0.544	0.572	3.39642613000707e-218	1	mm10---Ophn1
mm10---Pld3	1.68953760745896e-222	0.430456	0.443	0.311	4.52796078799001e-218	1	mm10---Pld3
mm10---Akap8	1.70235147154988e-222	0.234175	0.639	0.693	4.56230194375368e-218	1	mm10---Akap8
mm10---Prxl2c	4.88987775951766e-222	0.324115	0.473	0.422	1.31048723955073e-217	1	mm10---Prxl2c
mm10---Baiap2	4.97321785711877e-222	0.418173	0.309	0.108	1.33282238570783e-217	1	mm10---Baiap2
mm10---Tafa2	5.86770387656739e-222	0.60765	0.803	0.666	1.57254463892006e-217	1	mm10---Tafa2
mm10---Map7d2	1.61787127088545e-221	0.216344	0.676	0.745	4.335895005973e-217	1	mm10---Map7d2
mm10---Nme7	1.71647273812e-221	0.301143	0.611	0.622	4.60014693816161e-217	1	mm10---Nme7
mm10---Mtif2	1.84811157624488e-221	0.262591	0.62	0.654	4.95293902433628e-217	1	mm10---Mtif2
mm10---Dhx30	2.14421221919611e-221	0.261402	0.696	0.733	5.74648874744557e-217	1	mm10---Dhx30
mm10---Kantr	2.57486419742652e-221	0.310967	0.514	0.495	6.90063604910308e-217	1	mm10---Kantr
mm10---Rmdn1	8.78996883777238e-221	0.328642	0.823	0.835	2.355711648523e-216	1	mm10---Rmdn1
mm10---Cdkl1	9.94825801475601e-221	0.272517	0.496	0.502	2.66613314795461e-216	1	mm10---Cdkl1
mm10---Krit1	1.23926125643205e-220	0.227971	0.755	0.82	3.32122016723789e-216	1	mm10---Krit1
mm10---Lgmn	1.29469403820841e-220	0.323553	0.446	0.389	3.46978002239853e-216	1	mm10---Lgmn
mm10---Atg16l2	2.3044280593355e-220	0.315441	0.525	0.49	6.17586719901915e-216	1	mm10---Atg16l2
mm10---Tm9sf4	3.09832306747616e-220	0.203573	0.564	0.624	8.3035058208361e-216	1	mm10---Tm9sf4
mm10---Pcyt2	3.26232538977407e-220	0.355485	0.72	0.711	8.74303204459452e-216	1	mm10---Pcyt2
mm10---Vti1b	4.7537097041057e-220	0.319974	0.537	0.512	1.27399420070033e-215	1	mm10---Vti1b
mm10---Prelid3a	5.16305153481841e-220	0.364012	0.512	0.44	1.38369781133133e-215	1	mm10---Prelid3a
mm10---Ppib	8.56472135297119e-220	0.290525	0.512	0.503	2.29534532259628e-215	1	mm10---Ppib
mm10---Tbc1d1	1.13101688212482e-219	0.404197	0.437	0.357	3.03112524409451e-215	1	mm10---Tbc1d1
mm10---Slc25a3	2.20552849505421e-219	0.213856	0.526	0.577	5.91081636674529e-215	1	mm10---Slc25a3
mm10---Magi1	2.83944909795876e-219	0.383998	0.954	0.924	7.60972358252949e-215	1	mm10---Magi1
mm10---Slc50a1	4.82837017434461e-219	0.302738	0.444	0.416	1.29400320672436e-214	1	mm10---Slc50a1
mm10---Kcnq5	8.92967350989206e-219	0.589455	0.638	0.384	2.39315250065107e-214	1	mm10---Kcnq5
mm10---Catspere2	1.02491731290704e-218	0.337031	0.574	0.564	2.74677839859087e-214	1	mm10---Catspere2
mm10---P4htm	1.098592866613e-218	0.220951	0.478	0.525	2.94422888252283e-214	1	mm10---P4htm
mm10---Zscan26	1.47465593487949e-218	0.276829	0.59	0.603	3.95207790547705e-214	1	mm10---Zscan26
mm10---Srpr	1.89653918674939e-218	0.315496	0.486	0.451	5.08272502048837e-214	1	mm10---Srpr
mm10---Fbxo11	2.13150068635138e-218	0.208908	0.7	0.776	5.71242183942169e-214	1	mm10---Fbxo11
mm10---Mast2	2.75929738853926e-218	0.282056	0.731	0.757	7.3949170012852e-214	1	mm10---Mast2
mm10---Ncoa7	5.51480682269069e-218	0.290671	0.772	0.809	1.47796822848111e-213	1	mm10---Ncoa7
mm10---Lars	5.98245504071587e-218	0.181421	0.574	0.649	1.60329795091185e-213	1	mm10---Lars
mm10---Ttc4	2.44429134423895e-217	0.23274	0.5	0.524	6.55070080256039e-213	1	mm10---Ttc4
mm10---Cep83	5.02790218090174e-217	0.141722	0.465	0.553	1.34747778448167e-212	1	mm10---Cep83
mm10---Nrf1	9.21781885089845e-217	0.288315	0.567	0.582	2.47037545204078e-212	1	mm10---Nrf1
mm10---Nudcd3	9.41544455552214e-217	0.207332	0.59	0.646	2.52333914087993e-212	1	mm10---Nudcd3
mm10---Gpc5	1.08260870346527e-216	1.04551	0.558	0.352	2.90139132528691e-212	1	mm10---Gpc5
mm10---Tafa1	1.14136364250387e-216	0.801665	0.669	0.462	3.05885456191038e-212	1	mm10---Tafa1
mm10---Capn15	1.44539985507601e-216	0.189641	0.573	0.64	3.87367161160371e-212	1	mm10---Capn15
mm10---Sos2	1.73829846538566e-216	0.281469	0.533	0.527	4.65863988723357e-212	1	mm10---Sos2
mm10---2610020C07Rik	1.99782201501809e-216	0.318754	0.525	0.501	5.35416300024849e-212	1	mm10---2610020C07Rik
mm10---Ralgps2	3.93966110587191e-216	0.252233	0.596	0.628	1.05582917637367e-211	1	mm10---Ralgps2
mm10---Pura	4.77042797726169e-216	0.249517	0.525	0.543	1.27847469790613e-211	1	mm10---Pura
mm10---Tnrc6c	4.87475885013047e-216	0.337715	0.884	0.889	1.30643537183497e-211	1	mm10---Tnrc6c
mm10---Gm48742	7.1178100598349e-216	0.485044	0.363	0.186	1.90757309603575e-211	1	mm10---Gm48742
mm10---Cul1	1.0427613062914e-215	0.209716	0.682	0.751	2.79460030086095e-211	1	mm10---Cul1
mm10---Trpm7	1.1570745131766e-215	0.287926	0.821	0.853	3.10095969531329e-211	1	mm10---Trpm7
mm10---Preb	1.43150050001193e-215	0.228535	0.49	0.524	3.83642134003198e-211	1	mm10---Preb
mm10---Zfp280d	2.21979117979001e-215	0.28124	0.787	0.825	5.94904036183722e-211	1	mm10---Zfp280d
mm10---Hsp90b1	2.32716295151444e-215	0.315898	0.565	0.566	6.2367967100587e-211	1	mm10---Hsp90b1
mm10---Sars	4.59509945058331e-215	0.180116	0.497	0.555	1.23148665275633e-210	1	mm10---Sars
mm10---Nsmaf	2.1947559131389e-214	0.207495	0.482	0.522	5.88194584721224e-210	1	mm10---Nsmaf
mm10---Cfap46	3.11795156189002e-214	0.38705	0.291	0.123	8.35611018586525e-210	1	mm10---Cfap46
mm10---Psmd4	3.48079723621979e-214	0.222275	0.487	0.516	9.32853659306904e-210	1	mm10---Psmd4
mm10---Slc24a5	3.61345800923634e-214	0.378695	0.693	0.648	9.6840674647534e-210	1	mm10---Slc24a5
mm10---Vamp4	6.10341762265434e-214	0.30138	0.449	0.422	1.63571592287136e-209	1	mm10---Vamp4
mm10---Tial1	1.47726430488368e-213	0.190694	0.606	0.672	3.95906833708826e-209	1	mm10---Tial1
mm10---Timm44	1.92927362552854e-213	0.197168	0.441	0.473	5.1704533164165e-209	1	mm10---Timm44
mm10---Gabra3	2.05733259496593e-213	0.477227	0.556	0.368	5.5136513545087e-209	1	mm10---Gabra3
mm10---Klhdc10	2.43084695653509e-213	0.219048	0.697	0.766	6.51466984351405e-209	1	mm10---Klhdc10
mm10---Erp29	2.52014371231336e-213	0.348719	0.411	0.351	6.7539851489998e-209	1	mm10---Erp29
mm10---Hdac3	3.60899698460036e-213	0.248723	0.409	0.409	9.67211191872897e-209	1	mm10---Hdac3
mm10---Ubxn4	4.861574435609e-213	0.208298	0.65	0.715	1.30290194874321e-208	1	mm10---Ubxn4
mm10---Armc9	5.20214105286214e-213	0.248851	0.686	0.733	1.39417380216705e-208	1	mm10---Armc9
mm10---Mttp	7.28307740708872e-213	0.435222	0.477	0.356	1.95186474509978e-208	1	mm10---Mttp
mm10---Sez6l2	9.52502581113341e-213	0.270096	0.635	0.655	2.55270691738375e-208	1	mm10---Sez6l2
mm10---Dlat	9.82436120234466e-213	0.150903	0.478	0.552	2.63292880222837e-208	1	mm10---Dlat
mm10---Exoc3	3.70387481454265e-212	0.217684	0.494	0.524	9.92638450297431e-208	1	mm10---Exoc3
mm10---Cntnap1	4.45299929880535e-212	0.298389	0.393	0.342	1.19340381207983e-207	1	mm10---Cntnap1
mm10---Ctdspl2	2.22943680224559e-211	0.25998	0.532	0.551	5.97489063001819e-207	1	mm10---Ctdspl2
mm10---Atp2b3	3.68455949587405e-211	0.216356	0.524	0.561	9.87461944894245e-207	1	mm10---Atp2b3
mm10---Tmem208	5.91014511213324e-211	0.339123	0.486	0.431	1.58391889005171e-206	1	mm10---Tmem208
mm10---Kcnb2	9.42301269835092e-211	0.505671	0.907	0.879	2.52536740315805e-206	1	mm10---Kcnb2
mm10---Srpk1	1.96173262472795e-210	0.210551	0.57	0.621	5.2574434342709e-206	1	mm10---Srpk1
mm10---Gabrb3	2.46370400376905e-210	0.334267	0.966	0.973	6.60272673010105e-206	1	mm10---Gabrb3
mm10---Gabra1	2.86342462888363e-210	0.370836	0.667	0.648	7.67397800540814e-206	1	mm10---Gabra1
mm10---Gm48678	3.04414908990279e-210	0.429292	0.608	0.512	8.15831956093949e-206	1	mm10---Gm48678
mm10---Ttc3	3.1139042665033e-210	0.323145	0.987	0.991	8.34526343422884e-206	1	mm10---Ttc3
mm10---Zfpm2	3.35168795646333e-210	0.814953	0.382	0.175	8.98252372332173e-206	1	mm10---Zfpm2
mm10---Usp14	5.77931360306762e-210	0.212439	0.551	0.599	1.54885604562212e-205	1	mm10---Usp14
mm10---Pdia3	2.01540987383195e-209	0.312368	0.583	0.577	5.40129846186963e-205	1	mm10---Pdia3
mm10---Kif2a	3.74835182544669e-209	0.203532	0.582	0.636	1.00455828921971e-204	1	mm10---Kif2a
mm10---Myo16	3.83122694568728e-209	0.525357	0.555	0.383	1.02676882144419e-204	1	mm10---Myo16
mm10---4732471J01Rik	3.89141655155664e-209	0.313821	0.606	0.605	1.04289963581718e-204	1	mm10---4732471J01Rik
mm10---Bbs5	4.08678799500505e-209	0.266051	0.423	0.409	1.09525918266135e-204	1	mm10---Bbs5
mm10---Nr3c2	4.71156856347848e-209	0.339314	0.799	0.817	1.26270037501223e-204	1	mm10---Nr3c2
mm10---Gm10785	4.80981409744255e-209	0.373594	0.531	0.465	1.2890301781146e-204	1	mm10---Gm10785
mm10---Gtpbp4	5.44719956471459e-209	0.167262	0.391	0.442	1.45984948334351e-204	1	mm10---Gtpbp4
mm10---Cox4i1	6.45654989033385e-209	0.298233	0.48	0.47	1.73035537060947e-204	1	mm10---Cox4i1
mm10---Ftx	1.1779928257343e-208	0.336354	0.847	0.863	3.15702077296792e-204	1	mm10---Ftx
mm10---Ddx55	2.07569077470334e-208	0.206983	0.526	0.576	5.56285127620496e-204	1	mm10---Ddx55
mm10---A230004M16Rik	2.43815460856583e-208	0.39012	0.416	0.315	6.53425435095642e-204	1	mm10---A230004M16Rik
mm10---Gm9801	4.43588407331135e-208	0.193776	0.55	0.602	1.18881693164744e-203	1	mm10---Gm9801
mm10---Esrrg	6.44906172113486e-208	0.49918	0.812	0.801	1.72834854126414e-203	1	mm10---Esrrg
mm10---Rapgef4	1.43895093307961e-207	0.396104	0.836	0.733	3.85638850065334e-203	1	mm10---Rapgef4
mm10---Psma3	1.51443481446551e-207	0.232675	0.736	0.794	4.05868530276758e-203	1	mm10---Psma3
mm10---Nrp1	1.62158337773516e-207	0.53812	0.415	0.221	4.34584345233023e-203	1	mm10---Nrp1
mm10---Atp13a3	1.99411341683836e-207	0.255611	0.466	0.459	5.3442239571268e-203	1	mm10---Atp13a3
mm10---Traf3ip2	4.10872539343458e-207	0.394622	0.423	0.31	1.10113840544047e-202	1	mm10---Traf3ip2
mm10---Tmem30a	4.34796163480271e-207	0.323813	0.496	0.461	1.16525371812713e-202	1	mm10---Tmem30a
mm10---Sgcd	4.64403011433783e-207	0.605424	0.817	0.729	1.24460007064254e-202	1	mm10---Sgcd
mm10---Slc7a14	4.65705228200743e-207	0.289165	0.578	0.572	1.24809001157799e-202	1	mm10---Slc7a14
mm10---Txndc15	5.81088349147454e-207	0.347388	0.431	0.372	1.55731677571518e-202	1	mm10---Txndc15
mm10---Parp8	1.0956213207183e-206	0.385691	0.642	0.564	2.93626513952504e-202	1	mm10---Parp8
mm10---Sys1	1.60060869761859e-206	0.249489	0.38	0.37	4.28963130961782e-202	1	mm10---Sys1
mm10---Chic1	1.71592586921572e-206	0.262702	0.493	0.503	4.59868132949814e-202	1	mm10---Chic1
mm10---Ephb2	2.41445607029793e-206	0.376312	0.553	0.482	6.47074226839844e-202	1	mm10---Ephb2
mm10---Tmem255a	2.49692336224973e-206	0.444159	0.367	0.17	6.69175461082927e-202	1	mm10---Tmem255a
mm10---Nf2	8.32915738612481e-206	0.252828	0.41	0.419	2.23221417948145e-201	1	mm10---Nf2
mm10---Mcf2l	1.45405873051331e-205	0.241835	0.618	0.648	3.89687739777568e-201	1	mm10---Mcf2l
mm10---Rprd2	2.03357361347875e-205	0.169331	0.574	0.65	5.44997728412305e-201	1	mm10---Rprd2
mm10---Upf2	2.21634871963008e-205	0.215599	0.556	0.603	5.93981456860863e-201	1	mm10---Upf2
mm10---Bbof1	2.40886611293883e-205	0.218698	0.432	0.46	6.45576118267605e-201	1	mm10---Bbof1
mm10---Desi2	2.77718507513747e-205	0.188452	0.611	0.683	7.44285600136842e-201	1	mm10---Desi2
mm10---Mecr	3.59895629954773e-205	0.161649	0.55	0.628	9.64520288278792e-201	1	mm10---Mecr
mm10---Hnrnpr	4.44779470429022e-205	0.167816	0.639	0.73	1.19200898074978e-200	1	mm10---Hnrnpr
mm10---Ppt1	6.14907383780924e-205	0.226634	0.551	0.587	1.64795178853288e-200	1	mm10---Ppt1
mm10---Git2	1.12828256003298e-204	0.174128	0.492	0.557	3.02379726088838e-200	1	mm10---Git2
mm10---Ece2	1.45162069227209e-204	0.14531	0.5	0.581	3.89034345528921e-200	1	mm10---Ece2
mm10---Gm35188	1.64573952871202e-204	0.443684	0.689	0.596	4.41058193694822e-200	1	mm10---Gm35188
mm10---Snrnp48	1.79415094710771e-204	0.175477	0.627	0.708	4.80832453824867e-200	1	mm10---Snrnp48
mm10---Synj2bp	2.34953473268751e-204	0.224161	0.638	0.686	6.29675308360252e-200	1	mm10---Synj2bp
mm10---Adgrl2	2.78254878037376e-204	0.276199	0.582	0.655	7.45723073140168e-200	1	mm10---Adgrl2
mm10---Timm9	5.72007802422327e-204	0.190528	0.547	0.61	1.53298091049184e-199	1	mm10---Timm9
mm10---2610037D02Rik	7.02951194464212e-204	0.218113	0.537	0.587	1.88390920116409e-199	1	mm10---2610037D02Rik
mm10---Adat1	8.40298890183351e-204	0.210038	0.358	0.375	2.25200102569138e-199	1	mm10---Adat1
mm10---Gps2	2.75604948714741e-203	0.243851	0.477	0.49	7.38621262555506e-199	1	mm10---Gps2
mm10---Tmem91	4.34545783919288e-203	0.443493	0.454	0.309	1.16458270090369e-198	1	mm10---Tmem91
mm10---Smap2	4.42238428697976e-203	0.230494	0.471	0.485	1.18519898891057e-198	1	mm10---Smap2
mm10---Taz	6.12371161510032e-203	0.263366	0.49	0.494	1.64115471284688e-198	1	mm10---Taz
mm10---Kdm2b	7.40863872839319e-203	0.276619	0.492	0.488	1.98551517920937e-198	1	mm10---Kdm2b
mm10---Klc2	9.63144941532926e-203	0.12263	0.417	0.494	2.58122844330824e-198	1	mm10---Klc2
mm10---Psmd7	1.02440381098524e-202	0.281904	0.493	0.496	2.74540221344044e-198	1	mm10---Psmd7
mm10---Slc16a11	1.32112191949256e-202	0.440469	0.341	0.169	3.54060674424005e-198	1	mm10---Slc16a11
mm10---Taf15	1.48886355153754e-202	0.13396	0.571	0.663	3.99015431812062e-198	1	mm10---Taf15
mm10---Vstm2a	1.6110419642151e-202	0.426701	0.374	0.218	4.31759246409647e-198	1	mm10---Vstm2a
mm10---Mrps5	2.24747270263135e-202	0.208605	0.49	0.53	6.02322684305202e-198	1	mm10---Mrps5
mm10---Rabl6	3.25397872630146e-202	0.138166	0.673	0.777	8.72066298648793e-198	1	mm10---Rabl6
mm10---Ndufs1	4.55925589741437e-202	0.118486	0.515	0.612	1.22188058050705e-197	1	mm10---Ndufs1
mm10---Zdhhc21	4.99000959603079e-202	0.16194	0.452	0.511	1.33732257173625e-197	1	mm10---Zdhhc21
mm10---Zfp652	6.23864581559015e-202	0.202187	0.54	0.59	1.67195707857816e-197	1	mm10---Zfp652
mm10---Car10	6.27604517601652e-202	0.539466	0.833	0.721	1.68198010717243e-197	1	mm10---Car10
mm10---Sumo1	7.34954985997287e-202	0.22094	0.558	0.6	1.96967936247273e-197	1	mm10---Sumo1
mm10---Sdha	8.89263244122951e-202	0.184914	0.485	0.533	2.38322549424951e-197	1	mm10---Sdha
mm10---Rpn2	1.16810287602204e-201	0.178527	0.378	0.425	3.13051570773907e-197	1	mm10---Rpn2
mm10---Dnajb6	1.18913440429796e-201	0.127183	0.513	0.601	3.18688020351853e-197	1	mm10---Dnajb6
mm10---Tmem175	1.88201979495493e-201	0.254852	0.596	0.623	5.04381305047921e-197	1	mm10---Tmem175
mm10---Zfp941	2.60554622922191e-201	0.306878	0.439	0.391	6.98286389431472e-197	1	mm10---Zfp941
mm10---Rnasek	5.34176939656183e-201	0.420611	0.472	0.374	1.43159419827857e-196	1	mm10---Rnasek
mm10---Tasor2	1.57783182730274e-200	0.137842	0.52	0.607	4.22858929717133e-196	1	mm10---Tasor2
mm10---St13	1.66919349834468e-200	0.182317	0.482	0.536	4.47343857556373e-196	1	mm10---St13
mm10---Stat5b	1.79887863758543e-200	0.329107	0.494	0.444	4.82099474872895e-196	1	mm10---Stat5b
mm10---Snx32	2.09423010784606e-200	0.168719	0.535	0.606	5.61253668902745e-196	1	mm10---Snx32
mm10---Thy1	3.40444341176384e-200	0.125832	0.56	0.669	9.12390834352709e-196	1	mm10---Thy1
mm10---Mmaa	3.62240630609007e-200	0.189779	0.437	0.479	9.70804890032139e-196	1	mm10---Mmaa
mm10---Map2	6.00104505967307e-200	0.300811	0.945	0.963	1.60828007599238e-195	1	mm10---Map2
mm10---Pygb	9.99189901281983e-200	0.306357	0.448	0.403	2.67782893543571e-195	1	mm10---Pygb
mm10---Psmc6	1.27967352862488e-199	0.210795	0.545	0.589	3.42952505671467e-195	1	mm10---Psmc6
mm10---Ubp1	1.57944729451614e-199	0.117769	0.475	0.572	4.23291874930327e-195	1	mm10---Ubp1
mm10---Epha10	2.60477141134301e-199	0.408775	0.703	0.615	6.98078738239927e-195	1	mm10---Epha10
mm10---4932443L11Rik	3.17923973627473e-199	0.374221	0.436	0.348	8.52036249321627e-195	1	mm10---4932443L11Rik
mm10---Tra2b	3.61440847490565e-199	0.136837	0.516	0.601	9.68661471274713e-195	1	mm10---Tra2b
mm10---Acadsb	4.26568612504534e-199	0.250295	0.616	0.645	1.14320388151215e-194	1	mm10---Acadsb
mm10---Kdm4c	4.35969595771481e-199	0.188148	0.725	0.796	1.16839851666757e-194	1	mm10---Kdm4c
mm10---Osbpl6	5.38527676394901e-199	0.362481	0.927	0.919	1.44325417273833e-194	1	mm10---Osbpl6
mm10---Cryzl1	1.07202917128435e-198	0.163783	0.604	0.687	2.87303817904205e-194	1	mm10---Cryzl1
mm10---Prnp	1.1075426590144e-198	0.17364	0.473	0.553	2.96821432615858e-194	1	mm10---Prnp
mm10---Rnf14	1.13096042403594e-198	0.200475	0.474	0.51	3.03097393641633e-194	1	mm10---Rnf14
mm10---Ccnc	1.69993784332539e-198	0.154526	0.503	0.57	4.55583342011203e-194	1	mm10---Ccnc
mm10---Gabarapl2	1.723392640598e-198	0.249808	0.395	0.39	4.61869227680263e-194	1	mm10---Gabarapl2
mm10---Med27	2.86631820385891e-198	0.122711	0.455	0.539	7.68173278634187e-194	1	mm10---Med27
mm10---Slc25a23	3.23467074305075e-198	0.215987	0.565	0.618	8.668917591376e-194	1	mm10---Slc25a23
mm10---Setdb1	3.23930319611253e-198	0.159346	0.539	0.611	8.68133256558158e-194	1	mm10---Setdb1
mm10---Supt3	4.33453818180983e-198	0.252514	0.581	0.606	1.16165623272503e-193	1	mm10---Supt3
mm10---Slc2a3	4.52343415771908e-198	0.312565	0.567	0.551	1.21228035426871e-193	1	mm10---Slc2a3
mm10---Cbx5	5.9516447597557e-198	0.215862	0.479	0.51	1.59504079561453e-193	1	mm10---Cbx5
mm10---Pebp1	6.30381653265436e-198	0.358956	0.494	0.42	1.68942283075137e-193	1	mm10---Pebp1
mm10---Ubxn11	6.36921364124111e-198	0.309633	0.395	0.349	1.70694925585262e-193	1	mm10---Ubxn11
mm10---Ogfod1	7.36578517970978e-198	0.240546	0.475	0.483	1.97403042816222e-193	1	mm10---Ogfod1
mm10---Terf1	1.12533673569287e-197	0.19294	0.419	0.453	3.01590245165689e-193	1	mm10---Terf1
mm10---Spata7	1.32843732541355e-197	0.106837	0.569	0.683	3.56021203210832e-193	1	mm10---Spata7
mm10---Pnkd	1.35134821250098e-197	0.233585	0.497	0.522	3.62161320950264e-193	1	mm10---Pnkd
mm10---Fxyd6	1.70653185400352e-197	0.456916	0.265	0.102	4.57350536872943e-193	1	mm10---Fxyd6
mm10---Rbm4b	1.94809044578234e-197	0.29419	0.514	0.5	5.22088239469668e-193	1	mm10---Rbm4b
mm10---Prpf6	2.01396214613011e-197	0.141341	0.51	0.593	5.39741855162868e-193	1	mm10---Prpf6
mm10---Sf3b3	2.06357894404969e-197	0.233322	0.465	0.478	5.53039157005317e-193	1	mm10---Sf3b3
mm10---Fgd4	3.32720893986006e-197	0.276192	0.554	0.556	8.91691995882497e-193	1	mm10---Fgd4
mm10---Gpbp1	4.33512021346914e-197	0.127304	0.456	0.537	1.16181221720973e-192	1	mm10---Gpbp1
mm10---Yme1l1	6.54425981105113e-197	0.190373	0.563	0.623	1.7538616293617e-192	1	mm10---Yme1l1
mm10---Srr	6.87433943349681e-197	0.16726	0.501	0.573	1.84232296817714e-192	1	mm10---Srr
mm10---Rasa1	1.4181718975621e-196	0.131989	0.464	0.547	3.80070068546642e-192	1	mm10---Rasa1
mm10---Gga2	1.66315283279491e-196	0.250086	0.367	0.346	4.45724959189037e-192	1	mm10---Gga2
mm10---Glg1	1.82317241929416e-196	0.212793	0.715	0.776	4.88610208370835e-192	1	mm10---Glg1
mm10---Ddhd2	2.6663447906577e-196	0.258011	0.712	0.751	7.14580403896263e-192	1	mm10---Ddhd2
mm10---Grm5	2.73916680287521e-196	0.454607	0.97	0.949	7.34096703170557e-192	1	mm10---Grm5
mm10---Copg1	3.97568212662675e-196	0.19988	0.425	0.454	1.06548280993597e-191	1	mm10---Copg1
mm10---Sycp2	6.61177042526511e-196	0.313133	0.437	0.392	1.77195447397105e-191	1	mm10---Sycp2
mm10---Rhbdl1	7.9609887226927e-196	0.299562	0.537	0.524	2.13354497768164e-191	1	mm10---Rhbdl1
mm10---Fyttd1	1.17371568158359e-195	0.185564	0.506	0.557	3.14555802664401e-191	1	mm10---Fyttd1
mm10---Mtus2	1.21964962507326e-195	0.321109	0.862	0.876	3.26866099519633e-191	1	mm10---Mtus2
mm10---Gon4l	1.90784020963865e-195	0.155695	0.647	0.736	5.11301176183157e-191	1	mm10---Gon4l
mm10---Senp7	2.05039305992689e-195	0.246568	0.659	0.694	5.49505340060407e-191	1	mm10---Senp7
mm10---Zfp160	3.26937488809408e-195	0.176776	0.422	0.463	8.76192470009214e-191	1	mm10---Zfp160
mm10---Nrp2	3.3606404938366e-195	0.388998	0.355	0.152	9.00651652348208e-191	1	mm10---Nrp2
mm10---Asb3	4.06298380537284e-195	0.21644	0.67	0.719	1.08887965983992e-190	1	mm10---Asb3
mm10---Rgs17	4.16976341770122e-195	0.362357	0.719	0.678	1.11749659594393e-190	1	mm10---Rgs17
mm10---Cbx1	5.50230397987392e-195	0.221373	0.401	0.41	1.47461746660621e-190	1	mm10---Cbx1
mm10---Iqsec3	6.2292105387906e-195	0.395514	0.554	0.44	1.66942842439588e-190	1	mm10---Iqsec3
mm10---5330434G04Rik	7.03659928090475e-195	0.318597	0.971	0.966	1.88580860728247e-190	1	mm10---5330434G04Rik
mm10---Sv2a	8.91439147267954e-195	0.234404	0.727	0.788	2.38905691467812e-190	1	mm10---Sv2a
mm10---Zc3h12b	1.07035813672077e-194	0.230556	0.588	0.627	2.86855980641166e-190	1	mm10---Zc3h12b
mm10---Grm8	1.14441139098381e-194	0.535704	0.693	0.466	3.06702252783662e-190	1	mm10---Grm8
mm10---Cep170	1.31818907279204e-194	0.103309	0.542	0.648	3.53274671508267e-190	1	mm10---Cep170
mm10---Gmps	1.45219315335555e-194	0.222458	0.428	0.441	3.89187765099288e-190	1	mm10---Gmps
mm10---Tsc1	1.6167998597006e-194	0.165348	0.605	0.676	4.33302362399761e-190	1	mm10---Tsc1
mm10---Usp37	1.87826445686394e-194	0.166525	0.534	0.599	5.03374874439536e-190	1	mm10---Usp37
mm10---Cstf2	2.07329876017304e-194	0.182042	0.433	0.464	5.55644067726376e-190	1	mm10---Cstf2
mm10---Ggps1	2.22597493295148e-194	0.171832	0.477	0.536	5.96561282030997e-190	1	mm10---Ggps1
mm10---Pcsk7	3.01247234085752e-194	0.133523	0.486	0.568	8.07342587349815e-190	1	mm10---Pcsk7
mm10---Fam133b	3.02824932665832e-194	0.100626	0.451	0.552	8.11570819544428e-190	1	mm10---Fam133b
mm10---Taf1b	3.1232798995043e-194	0.173515	0.562	0.624	8.37039013067153e-190	1	mm10---Taf1b
mm10---5430405H02Rik	3.74324079016151e-194	0.247179	0.371	0.358	1.00318853176328e-189	1	mm10---5430405H02Rik
mm10---Phlpp2	3.96599492467245e-194	0.342486	0.509	0.445	1.06288663981222e-189	1	mm10---Phlpp2
mm10---Jkamp	4.0204950726669e-194	0.264328	0.44	0.426	1.07749267947473e-189	1	mm10---Jkamp
mm10---Smg6	4.1845546551173e-194	0.272585	0.86	0.896	1.12146064757144e-189	1	mm10---Smg6
mm10---Vat1l	6.49686727623756e-194	0.515017	0.501	0.299	1.74116043003167e-189	1	mm10---Vat1l
mm10---Hap1	6.6267763874693e-194	0.461515	0.438	0.247	1.77597607184177e-189	1	mm10---Hap1
mm10---Rrnad1	7.35214095715926e-194	0.236208	0.495	0.504	1.97037377651868e-189	1	mm10---Rrnad1
mm10---Ndufs4	1.10893087799848e-193	0.166053	0.64	0.722	2.97193475303593e-189	1	mm10---Ndufs4
mm10---Phc2	1.39217906413781e-193	0.218056	0.602	0.641	3.73103989188933e-189	1	mm10---Phc2
mm10---Sh3gl1	1.79079752230795e-193	0.240883	0.454	0.455	4.79933735978532e-189	1	mm10---Sh3gl1
mm10---Tmem179	2.08620963385126e-193	0.35439	0.396	0.301	5.59104181872137e-189	1	mm10---Tmem179
mm10---Cfap36	2.92148170135167e-193	0.182893	0.461	0.509	7.82957095962248e-189	1	mm10---Cfap36
mm10---Nub1	2.98009349483207e-193	0.179502	0.448	0.493	7.98665056614994e-189	1	mm10---Nub1
mm10---Rbm28	3.01204455027986e-193	0.109731	0.509	0.606	8.07227939475003e-189	1	mm10---Rbm28
mm10---Dnajc18	3.60572304517818e-193	0.116049	0.435	0.518	9.66333776107753e-189	1	mm10---Dnajc18
mm10---Xrn2	4.32059352175977e-193	0.119269	0.592	0.693	1.15791906383162e-188	1	mm10---Xrn2
mm10---Pnn	4.67634009858653e-193	0.269719	0.795	0.839	1.25325914642119e-188	1	mm10---Pnn
mm10---Prpf39	5.34311467873268e-193	0.118625	0.523	0.613	1.43195473390036e-188	1	mm10---Prpf39
mm10---Hmgn3	6.22687615136615e-193	0.307564	0.519	0.49	1.66880280856613e-188	1	mm10---Hmgn3
mm10---Slc6a1	6.6839430634283e-193	0.47599	0.399	0.202	1.79129674099878e-188	1	mm10---Slc6a1
mm10---Pex14	6.98331250638413e-193	0.102324	0.421	0.515	1.87152775171095e-188	1	mm10---Pex14
mm10---Hagh	8.51878360112556e-193	0.203782	0.459	0.493	2.28303400510165e-188	1	mm10---Hagh
mm10---Nudt5	8.74771070012645e-193	0.295664	0.432	0.388	2.34438646763389e-188	1	mm10---Nudt5
mm10---Atpif1	1.06433163164556e-192	0.315444	0.514	0.484	2.85240877281009e-188	1	mm10---Atpif1
mm10---Usp20	1.07149199814132e-192	0.163571	0.437	0.492	2.87159855501873e-188	1	mm10---Usp20
mm10---Amy1	1.15262730783202e-192	0.247134	0.639	0.671	3.08904118498982e-188	1	mm10---Amy1
mm10---Mdh1	2.12461616070217e-192	0.236122	0.584	0.613	5.69397131068181e-188	1	mm10---Mdh1
mm10---Smg5	2.46747574979232e-192	0.159386	0.467	0.528	6.61283500944341e-188	1	mm10---Smg5
mm10---Tcaf1	2.77776492902909e-192	0.164496	0.667	0.752	7.44441000979796e-188	1	mm10---Tcaf1
mm10---Gdap1	3.62715883556791e-192	0.135531	0.415	0.49	9.720785679322e-188	1	mm10---Gdap1
mm10---Per3	3.75242182628684e-192	0.207405	0.402	0.433	1.00564904944487e-187	1	mm10---Per3
mm10---Pfdn1	6.12357352652435e-192	0.19149	0.396	0.422	1.64111770510853e-187	1	mm10---Pfdn1
mm10---Dlg1	8.10995987872616e-192	0.441814	0.686	0.522	2.17346924749861e-187	1	mm10---Dlg1
mm10---Sumo2	9.4544103463383e-192	0.211863	0.452	0.481	2.53378197281866e-187	1	mm10---Sumo2
mm10---Zfr2	9.82487189131629e-192	0.118241	0.508	0.609	2.63306566687276e-187	1	mm10---Zfr2
mm10---Nlgn1	1.1492205972276e-191	0.365928	0.995	0.978	3.07991120056997e-187	1	mm10---Nlgn1
mm10---Actr1b	1.16474376192416e-191	0.134756	0.52	0.606	3.12151328195675e-187	1	mm10---Actr1b
mm10---Eif2s2	1.17310865093498e-191	0.217527	0.465	0.497	3.14393118450574e-187	1	mm10---Eif2s2
mm10---Simc1	1.58074834488435e-191	0.314824	0.464	0.431	4.23640556429005e-187	1	mm10---Simc1
mm10---Tmem161b	1.71971271390719e-191	0.226896	0.505	0.527	4.60883007327128e-187	1	mm10---Tmem161b
mm10---Hspa4	1.9310457592745e-191	0.119801	0.465	0.559	5.17520263485567e-187	1	mm10---Hspa4
mm10---Ddx50	2.85204498979064e-191	0.235685	0.715	0.77	7.64348057263892e-187	1	mm10---Ddx50
mm10---Las1l	3.87001700022292e-191	0.129031	0.488	0.574	1.03716455605974e-186	1	mm10---Las1l
mm10---Cep164	4.55631389304864e-191	0.146406	0.51	0.586	1.22109212333704e-186	1	mm10---Cep164
mm10---Ap3m1	5.31701214826529e-191	0.208625	0.448	0.465	1.4249592557351e-186	1	mm10---Ap3m1
mm10---Brd8	5.41078477249937e-191	0.129988	0.434	0.51	1.45009031902983e-186	1	mm10---Brd8
mm10---Foxj3	7.95674350546918e-191	0.145437	0.473	0.544	2.13240725946574e-186	1	mm10---Foxj3
mm10---Copg2	9.01080675230496e-191	0.203769	0.626	0.685	2.41489620961773e-186	1	mm10---Copg2
mm10---Psmd11	1.17686618818249e-190	0.177744	0.605	0.673	3.15400138432908e-186	1	mm10---Psmd11
mm10---Syngr1	1.67218858219518e-190	0.183579	0.495	0.543	4.48146540028308e-186	1	mm10---Syngr1
mm10---Slc7a6os	2.6398864891831e-190	0.276892	0.399	0.375	7.0748957910107e-186	1	mm10---Slc7a6os
mm10---Eml6	2.71093319331867e-190	0.296084	0.878	0.909	7.26530095809404e-186	1	mm10---Eml6
mm10---Rnf207	3.59655309186653e-190	0.184159	0.329	0.369	9.63876228620229e-186	1	mm10---Rnf207
mm10---Hspa9	3.99537218558997e-190	0.202004	0.43	0.454	1.07075974573811e-185	1	mm10---Hspa9
mm10---Hs6st2	4.05337930199602e-190	0.409778	0.65	0.568	1.08630565293493e-185	1	mm10---Hs6st2
mm10---Zfp644	4.17851310978904e-190	0.122966	0.531	0.619	1.11984151342346e-185	1	mm10---Zfp644
mm10---Gabra5	4.48957516108338e-190	0.4038	0.341	0.211	1.20320614317035e-185	1	mm10---Gabra5
mm10---Mgat4a	4.9533999587097e-190	0.115666	0.413	0.494	1.3275111889342e-185	1	mm10---Mgat4a
mm10---Dennd6a	5.50609430977457e-190	0.11865	0.565	0.661	1.47563327501958e-185	1	mm10---Dennd6a
mm10---Scamp1	7.2821991426502e-190	0.250573	0.462	0.459	1.95162937023025e-185	1	mm10---Scamp1
mm10---Ndufv2	1.13643658572487e-189	0.105098	0.356	0.434	3.04565004974266e-185	1	mm10---Ndufv2
mm10---Psmd12	1.14912892311405e-189	0.146403	0.36	0.413	3.07966551394565e-185	1	mm10---Psmd12
mm10---Abhd16a	1.46984773057178e-189	0.27307	0.413	0.389	3.93919191793238e-185	1	mm10---Abhd16a
mm10---Pias1	1.76647280370962e-189	0.182007	0.627	0.699	4.73414711394179e-185	1	mm10---Pias1
mm10---Lztfl1	1.95032088050682e-189	0.15044	0.478	0.548	5.22685995975827e-185	1	mm10---Lztfl1
mm10---Rtf1	2.00942587067904e-189	0.174028	0.5	0.559	5.38526133341984e-185	1	mm10---Rtf1
mm10---Galnt1	2.11375118358818e-189	0.200052	0.483	0.52	5.66485317201633e-185	1	mm10---Galnt1
mm10---Cox8a	2.1839246917417e-189	0.272852	0.422	0.407	5.85291817386777e-185	1	mm10---Cox8a
mm10---Mgrn1	2.26821832128787e-189	0.137673	0.512	0.591	6.07882510105149e-185	1	mm10---Mgrn1
mm10---Sdhb	2.56323578561744e-189	0.159781	0.352	0.397	6.86947190545474e-185	1	mm10---Sdhb
mm10---Rnf157	2.95315522646407e-189	0.159947	0.676	0.767	7.91445600692369e-185	1	mm10---Rnf157
mm10---Btbd10	3.58187320373662e-189	0.147416	0.495	0.567	9.59942018601414e-185	1	mm10---Btbd10
mm10---Nop56	3.8508886310471e-189	0.174968	0.453	0.496	1.03203815312062e-184	1	mm10---Nop56
mm10---4933434E20Rik	4.64302807124527e-189	0.195452	0.394	0.418	1.24433152309373e-184	1	mm10---4933434E20Rik
mm10---Rpl13	4.72982697031277e-189	0.330549	0.456	0.405	1.26759362804382e-184	1	mm10---Rpl13
mm10---Gm16599	6.53519094944517e-189	0.327046	0.562	0.527	1.75143117445131e-184	1	mm10---Gm16599
mm10---Lrrc24	6.61605295787719e-189	0.34595	0.325	0.215	1.77310219271109e-184	1	mm10---Lrrc24
mm10---Ttc8	1.11243992117945e-188	0.219338	0.692	0.741	2.98133898876091e-184	1	mm10---Ttc8
mm10---Psmd1	2.14252015319491e-188	0.144343	0.622	0.712	5.74195401056235e-184	1	mm10---Psmd1
mm10---Sos1	2.39386499776685e-188	0.101557	0.54	0.644	6.41555819401516e-184	1	mm10---Sos1
mm10---Zfp207	2.72247216066967e-188	0.127756	0.565	0.651	7.29622539059471e-184	1	mm10---Zfp207
mm10---Eif5b	2.98378021137195e-188	0.129367	0.518	0.608	7.99653096647683e-184	1	mm10---Eif5b
mm10---Slitrk1	3.05880016002552e-188	0.278099	0.384	0.341	8.1975844288684e-184	1	mm10---Slitrk1
mm10---Rasgef1a	4.50776213630724e-188	0.252399	0.498	0.5	1.20808025253034e-183	1	mm10---Rasgef1a
mm10---Rnps1	4.5356466977549e-188	0.198693	0.438	0.467	1.21555331499831e-183	1	mm10---Rnps1
mm10---Sf3b2	4.65239403902032e-188	0.168046	0.526	0.584	1.24684160245745e-183	1	mm10---Sf3b2
mm10---Sarnp	5.20442889334184e-188	0.14379	0.551	0.637	1.39478694341561e-183	1	mm10---Sarnp
mm10---Rlf	6.54155396153828e-188	0.123535	0.59	0.684	1.75313646169226e-183	1	mm10---Rlf
mm10---Kdm2a	7.45169488828883e-188	0.215513	0.695	0.751	1.99705423006141e-183	1	mm10---Kdm2a
mm10---Thsd7b	7.83477637267812e-188	0.402721	0.577	0.342	2.09972006787774e-183	1	mm10---Thsd7b
mm10---Ola1	8.18953319808907e-188	0.12206	0.559	0.655	2.19479489708787e-183	1	mm10---Ola1
mm10---Calr	1.02372836062929e-187	0.311352	0.47	0.432	2.74359200648649e-183	1	mm10---Calr
mm10---Gm39469	1.128716835668e-187	0.263927	0.395	0.369	3.02496111959023e-183	1	mm10---Gm39469
mm10---Cadm3	1.62981894876908e-187	0.205371	0.552	0.595	4.36791478270114e-183	1	mm10---Cadm3
mm10---Nfatc2	1.89887499261644e-187	0.343257	0.288	0.153	5.08898498021205e-183	1	mm10---Nfatc2
mm10---Ppp4r3b	1.91556186014876e-187	0.149669	0.521	0.593	5.13370578519869e-183	1	mm10---Ppp4r3b
mm10---Tmbim6	1.92413337152719e-187	0.258324	0.47	0.466	5.15667743569287e-183	1	mm10---Tmbim6
mm10---Mfap3	2.26872350437626e-187	0.199045	0.428	0.454	6.08017899172836e-183	1	mm10---Mfap3
mm10---Nob1	2.43581986280715e-187	0.183154	0.377	0.409	6.52799723232316e-183	1	mm10---Nob1
mm10---Gstz1	2.93920483873648e-187	0.228878	0.426	0.441	7.87706896781376e-183	1	mm10---Gstz1
mm10---Sec22a	3.44265772597998e-187	0.113944	0.4	0.479	9.22632270562633e-183	1	mm10---Sec22a
mm10---Supt16	3.65558511252272e-187	0.100943	0.4	0.482	9.79696810156088e-183	1	mm10---Supt16
mm10---Urgcp	5.60493740972995e-187	0.167708	0.518	0.583	1.50212322580763e-182	1	mm10---Urgcp
mm10---Rogdi	5.68009896634804e-187	0.306259	0.457	0.418	1.52226652298127e-182	1	mm10---Rogdi
mm10---Cltb	6.17288189222420e-187	0.159297	0.518	0.585	1.65433234711608e-182	1	mm10---Cltb
mm10---Slc25a4	8.92672815657466e-187	0.263082	0.475	0.468	2.39236314596201e-182	1	mm10---Slc25a4
mm10---Fam120b	9.77952246212226e-187	0.170595	0.6	0.666	2.62091201984877e-182	1	mm10---Fam120b
mm10---Kdm5c	9.79967819608528e-187	0.149529	0.457	0.522	2.62631375655086e-182	1	mm10---Kdm5c
mm10---Gde1	1.12772836295238e-186	0.224665	0.436	0.458	3.02231201271239e-182	1	mm10---Gde1
mm10---Esco1	1.82939164123364e-186	0.103448	0.448	0.542	4.90276959850617e-182	1	mm10---Esco1
mm10---Rsrc2	2.10012627477626e-186	0.141381	0.584	0.675	5.62833841640037e-182	1	mm10---Rsrc2
mm10---Wasf3	2.27498476255449e-186	0.180362	0.506	0.552	6.09695916364602e-182	1	mm10---Wasf3
mm10---Flot2	2.6090875509606e-186	0.251688	0.47	0.472	6.9923546365744e-182	1	mm10---Flot2
mm10---Snx14	3.30380377994087e-186	0.130568	0.455	0.532	8.85419413024154e-182	1	mm10---Snx14
mm10---Cfdp1	3.50423425666727e-186	0.160025	0.518	0.585	9.39134780786829e-182	1	mm10---Cfdp1
mm10---Spats2	3.92592540687327e-186	0.16797	0.356	0.399	1.05214800904204e-181	1	mm10---Spats2
mm10---Sipa1l1	6.79758554540751e-186	0.355264	0.629	0.571	1.82175292616921e-181	1	mm10---Sipa1l1
mm10---Slc4a7	7.21134253754912e-186	0.225117	0.452	0.465	1.93263980006317e-181	1	mm10---Slc4a7
mm10---Ric3	7.47336586294459e-186	0.195826	0.458	0.488	2.00286205126915e-181	1	mm10---Ric3
mm10---Zfp397	8.10241946296795e-186	0.207045	0.422	0.438	2.17144841607541e-181	1	mm10---Zfp397
mm10---Cdc123	9.19851648665206e-186	0.102417	0.371	0.447	2.46520241842275e-181	1	mm10---Cdc123
mm10---Map4k2	1.52527133417696e-185	0.135976	0.458	0.531	4.08772717559426e-181	1	mm10---Map4k2
mm10---Arfgap1	1.87049356322051e-185	0.101465	0.456	0.549	5.01292274943096e-181	1	mm10---Arfgap1
mm10---Tmed10	2.09260682797557e-185	0.195759	0.467	0.502	5.60818629897452e-181	1	mm10---Tmed10
mm10---Appl1	2.24589729880374e-185	0.177616	0.599	0.666	6.01900476079403e-181	1	mm10---Appl1
mm10---Gm2824	2.54404219881367e-185	0.411945	0.293	0.119	6.81803309282063e-181	1	mm10---Gm2824
mm10---Ddx42	2.61712206605522e-185	0.118126	0.451	0.532	7.01388713702798e-181	1	mm10---Ddx42
mm10---Snap47	2.86793685271523e-185	0.172593	0.44	0.491	7.68607076527682e-181	1	mm10---Snap47
mm10---Gm17106	3.20705049113766e-185	0.34967	0.454	0.373	8.59489531624894e-181	1	mm10---Gm17106
mm10---Dync2h1	3.27158396646582e-185	0.204317	0.691	0.751	8.76784503012839e-181	1	mm10---Dync2h1
mm10---B4gat1	3.68205106919642e-185	0.396574	0.361	0.232	9.8678968654464e-181	1	mm10---B4gat1
mm10---Supt20	4.26610714818301e-185	0.274022	0.516	0.509	1.14331671571305e-180	1	mm10---Supt20
mm10---Lrp8	5.59466413704928e-185	0.195729	0.49	0.525	1.49936998872921e-180	1	mm10---Lrp8
mm10---Tmem246	5.93175426297098e-185	0.304089	0.408	0.353	1.58971014247622e-180	1	mm10---Tmem246
mm10---Orc3	7.41020781817104e-185	0.127892	0.434	0.51	1.98593569526984e-180	1	mm10---Orc3
mm10---Myl12b	1.01053255038332e-184	0.143383	0.404	0.465	2.70822723502729e-180	1	mm10---Myl12b
mm10---Ptchd1	1.52791400971994e-184	0.411292	0.402	0.287	4.09480954604943e-180	1	mm10---Ptchd1
mm10---Atp6v1a	1.86911124586117e-184	0.145453	0.444	0.503	5.00921813890792e-180	1	mm10---Atp6v1a
mm10---Usp50	2.3516979372066e-184	0.305742	0.444	0.394	6.30255047171368e-180	1	mm10---Usp50
mm10---Dcaf1	3.27441702559585e-184	0.136549	0.451	0.523	8.77543762859689e-180	1	mm10---Dcaf1
mm10---Pcmt1	4.27751365214673e-184	0.12525	0.572	0.664	1.14637365877532e-179	1	mm10---Pcmt1
mm10---Slc1a6	4.33284071713527e-184	0.31235	0.293	0.202	1.16120131219225e-179	1	mm10---Slc1a6
mm10---Naaladl2	4.69258643330729e-184	0.351694	0.87	0.882	1.25761316412635e-179	1	mm10---Naaladl2
mm10---Snx3	5.62724515854564e-184	0.142727	0.442	0.51	1.50810170249023e-179	1	mm10---Snx3
mm10---Rrn3	7.15120506790816e-184	0.145165	0.355	0.404	1.91652295819939e-179	1	mm10---Rrn3
mm10---Ckmt1	8.2295551139446e-184	0.218177	0.378	0.376	2.20552077053715e-179	1	mm10---Ckmt1
mm10---Impact	8.54071116505987e-184	0.155634	0.613	0.689	2.28891059223604e-179	1	mm10---Impact
mm10---Arnt2	9.75759682938266e-184	0.421217	0.565	0.417	2.61503595027455e-179	1	mm10---Arnt2
mm10---Zfp961	1.08762586381398e-183	0.200047	0.413	0.434	2.91483731502147e-179	1	mm10---Zfp961
mm10---Gdpd1	1.11150710549179e-183	0.16534	0.539	0.605	2.97883904271801e-179	1	mm10---Gdpd1
mm10---Rnf170	1.39189798284086e-183	0.219731	0.366	0.365	3.73028659401351e-179	1	mm10---Rnf170
mm10---Vps9d1	1.5115347589185e-183	0.183905	0.444	0.483	4.05091315390157e-179	1	mm10---Vps9d1
mm10---Msantd2	1.59122473627189e-183	0.175621	0.458	0.497	4.26448229320866e-179	1	mm10---Msantd2
mm10---Ddx39b	1.65367880743883e-183	0.18262	0.554	0.612	4.43185920393606e-179	1	mm10---Ddx39b
mm10---Arhgef12	1.88747532297482e-183	0.1969	0.72	0.785	5.05843386557252e-179	1	mm10---Arhgef12
mm10---Gtdc1	1.94520007957099e-183	0.311119	0.643	0.64	5.21313621325024e-179	1	mm10---Gtdc1
mm10---Zfp804b	1.99144844035906e-183	0.91892	0.651	0.507	5.33708182016228e-179	1	mm10---Zfp804b
mm10---Zdhhc17	2.6156987481004e-183	0.107752	0.552	0.649	7.01007264490907e-179	1	mm10---Zdhhc17
mm10---Fez1	2.62792864908457e-183	0.258943	0.444	0.43	7.04284877954664e-179	1	mm10---Fez1
mm10---Stim2	3.51944794865785e-183	0.232351	0.389	0.383	9.43212050240304e-179	1	mm10---Stim2
mm10---Abcb9	3.67871684370356e-183	0.207739	0.353	0.362	9.85896114112554e-179	1	mm10---Abcb9
mm10---Stx12	3.684249138271e-183	0.142662	0.417	0.481	9.87378769056627e-179	1	mm10---Stx12
mm10---Rbm26	4.73357458460494e-183	0.156716	0.656	0.739	1.26859798867412e-178	1	mm10---Rbm26
mm10---Ppil2	4.95082086214544e-183	0.122428	0.39	0.454	1.32681999105498e-178	1	mm10---Ppil2
mm10---Pum1	5.255753683226e-183	0.153332	0.656	0.737	1.40854198710457e-178	1	mm10---Pum1
mm10---Rmnd1	5.3189088461076e-183	0.103398	0.511	0.611	1.42546757075684e-178	1	mm10---Rmnd1
mm10---Ndufaf2	6.22889379170843e-183	0.271791	0.402	0.362	1.66934353617786e-178	1	mm10---Ndufaf2
mm10---Pstk	9.00037996350701e-183	0.119899	0.313	0.368	2.41210183021988e-178	1	mm10---Pstk
mm10---Ndfip2	1.2889171567809e-182	0.170226	0.457	0.503	3.45429798017281e-178	1	mm10---Ndfip2
mm10---Tmed9	1.35807074849104e-182	0.219213	0.468	0.491	3.63962960595599e-178	1	mm10---Tmed9
mm10---Nt5c2	1.58220955200209e-182	0.240986	0.758	0.8	4.24032159936560e-178	1	mm10---Nt5c2
mm10---Letm2	1.99075469657481e-182	0.134777	0.425	0.496	5.33522258682049e-178	1	mm10---Letm2
mm10---Slc38a2	2.90187825843337e-182	0.310398	0.614	0.595	7.77703373260144e-178	1	mm10---Slc38a2
mm10---Gfpt1	2.92254378117509e-182	0.218833	0.39	0.394	7.83241733354924e-178	1	mm10---Gfpt1
mm10---Zfp799	2.95494371767654e-182	0.182779	0.386	0.414	7.91924916337312e-178	1	mm10---Zfp799
mm10---Fchsd2	4.44959363973551e-182	0.26894	0.85	0.876	1.19249109544912e-177	1	mm10---Fchsd2
mm10---Emc7	5.03166281651255e-182	0.26923	0.419	0.394	1.34848563482536e-177	1	mm10---Emc7
mm10---Fkbp2	5.15409375472432e-182	0.256329	0.341	0.324	1.38129712626612e-177	1	mm10---Fkbp2
mm10---Nap1l4	5.22913166747286e-182	0.137949	0.383	0.436	1.40140728688273e-177	1	mm10---Nap1l4
mm10---Gtpbp2	5.5237579963034e-182	0.107679	0.391	0.468	1.48036714300931e-177	1	mm10---Gtpbp2
mm10---Ndn	6.66925152238275e-182	0.383146	0.271	0.127	1.78735940799858e-177	1	mm10---Ndn
mm10---Ndrg3	7.03045756499949e-182	0.179868	0.691	0.761	1.88416262741986e-177	1	mm10---Ndrg3
mm10---Xpo4	8.67860563775707e-182	0.137758	0.458	0.526	2.32586631091889e-177	1	mm10---Xpo4
mm10---Ilf2	9.86990699759224e-182	0.153214	0.415	0.472	2.64513507535472e-177	1	mm10---Ilf2
mm10---Timmdc1	1.05632788351916e-181	0.234961	0.476	0.485	2.83095872783135e-177	1	mm10---Timmdc1
mm10---Gm19710	1.2458104197577e-181	0.315909	0.478	0.432	3.33877192495064e-177	1	mm10---Gm19710
mm10---Ip6k1	1.25776327271904e-181	0.139848	0.647	0.739	3.37080557088704e-177	1	mm10---Ip6k1
mm10---Morf4l1	1.29341847373573e-181	0.15131	0.569	0.645	3.46636150961177e-177	1	mm10---Morf4l1
mm10---Mettl16	1.38504011855217e-181	0.192109	0.45	0.478	3.71190751771983e-177	1	mm10---Mettl16
mm10---Asah1	1.39245123905616e-181	0.193871	0.424	0.451	3.73176932067051e-177	1	mm10---Asah1
mm10---Nrd1	1.41777777855581e-181	0.21277	0.714	0.78	3.79964444652958e-177	1	mm10---Nrd1
mm10---Slc3a2	1.62708319371565e-181	0.197516	0.491	0.524	4.36058295915795e-177	1	mm10---Slc3a2
mm10---Pdia6	1.94670970481484e-181	0.34918	0.394	0.304	5.21718200890378e-177	1	mm10---Pdia6
mm10---Dnajc19	2.906499477202e-181	0.272207	0.41	0.383	7.78941859890135e-177	1	mm10---Dnajc19
mm10---Eno2	3.13734569612556e-181	0.120553	0.507	0.588	8.40808646561649e-177	1	mm10---Eno2
mm10---Tor1aip2	3.20499874619396e-181	0.140857	0.451	0.52	8.58939663979983e-177	1	mm10---Tor1aip2
mm10---Rpgrip1l	4.24461884273967e-181	0.158246	0.398	0.438	1.13755784985423e-176	1	mm10---Rpgrip1l
mm10---Tmem234	4.43931339390257e-181	0.135238	0.478	0.554	1.18973598956589e-176	1	mm10---Tmem234
mm10---Rnf138	4.59134941877688e-181	0.225503	0.476	0.495	1.2304816442322e-176	1	mm10---Rnf138
mm10---Pde3b	4.62761155905915e-181	0.275305	0.45	0.426	1.24019989782785e-176	1	mm10---Pde3b
mm10---Tmx3	5.50397233884367e-181	0.121542	0.446	0.521	1.4750645868101e-176	1	mm10---Tmx3
mm10---E230016M11Rik	6.8967174180532e-181	0.109194	0.474	0.565	1.84832026803826e-176	1	mm10---E230016M11Rik
mm10---Stx1b	7.35357652271658e-181	0.113409	0.349	0.41	1.97075850808804e-176	1	mm10---Stx1b
mm10---Capn7	8.28826207912225e-181	0.156204	0.406	0.453	2.22125423720476e-176	1	mm10---Capn7
mm10---Dop1b	8.43221683022864e-181	0.17579	0.573	0.633	2.25983411050128e-176	1	mm10---Dop1b
mm10---Sec61a2	8.51894964833425e-181	0.156787	0.602	0.676	2.28307850575358e-176	1	mm10---Sec61a2
mm10---Nup93	9.12626188976421e-181	0.144843	0.511	0.582	2.44583818645681e-176	1	mm10---Nup93
mm10---Hdac11	1.02266436952583e-180	0.248073	0.426	0.411	2.74074051032922e-176	1	mm10---Hdac11
mm10---Cdk11b	1.05414054814036e-180	0.105431	0.44	0.531	2.82509666901616e-176	1	mm10---Cdk11b
mm10---Taf1d	1.10655355637982e-180	0.166306	0.532	0.595	2.96556353109792e-176	1	mm10---Taf1d
mm10---Timm23	1.52221358537967e-180	0.16331	0.452	0.511	4.0795324088175e-176	1	mm10---Timm23
mm10---Pde4a	1.89441024743738e-180	0.283372	0.508	0.488	5.07701946313217e-176	1	mm10---Pde4a
mm10---Rragb	2.1058428065598e-180	0.301253	0.444	0.397	5.64365872158027e-176	1	mm10---Rragb
mm10---Manf	2.13265028356125e-180	0.249409	0.465	0.456	5.71550275994415e-176	1	mm10---Manf
mm10---B230307C23Rik	2.31025439359389e-180	0.123211	0.414	0.487	6.19148177483163e-176	1	mm10---B230307C23Rik
mm10---Rprd1a	3.20458861570187e-180	0.111132	0.507	0.595	8.588297490081e-176	1	mm10---Rprd1a
mm10---Pdxdc1	3.26434541052669e-180	0.14856	0.429	0.484	8.74844570021153e-176	1	mm10---Pdxdc1
mm10---Rab30	3.43565774277138e-180	0.186187	0.573	0.631	9.20756275062729e-176	1	mm10---Rab30
mm10---Kifc2	3.58745944439733e-180	0.182079	0.664	0.733	9.61439131098484e-176	1	mm10---Kifc2
mm10---Gm45159	4.02587791089661e-180	0.323912	0.363	0.27	1.07893528012029e-175	1	mm10---Gm45159
mm10---Rsbn1	4.41392024381616e-180	0.149514	0.421	0.475	1.18293062534273e-175	1	mm10---Rsbn1
mm10---Pdlim7	4.75157572700617e-180	0.178909	0.481	0.534	1.27342229483765e-175	1	mm10---Pdlim7
mm10---Glt8d1	5.2983079999852e-180	0.115385	0.332	0.401	1.41994654399603e-175	1	mm10---Glt8d1
mm10---Cnrip1	5.90950624237927e-180	0.237963	0.402	0.395	1.58374767295764e-175	1	mm10---Cnrip1
mm10---Lrrcc1	6.68374183893833e-180	0.148994	0.416	0.474	1.79124281283547e-175	1	mm10---Lrrcc1
mm10---Btbd7	9.30433975535207e-180	0.118892	0.573	0.662	2.49356305443435e-175	1	mm10---Btbd7
mm10---Gm4924	1.08306081952909e-179	0.135344	0.374	0.439	2.90260299633797e-175	1	mm10---Gm4924
mm10---Ccdc82	1.26636662887766e-179	0.283115	0.382	0.35	3.39386256539213e-175	1	mm10---Ccdc82
mm10---Fcho2	1.28782079921136e-179	0.136129	0.536	0.617	3.45135974188644e-175	1	mm10---Fcho2
mm10---Gab3	1.78625669835137e-179	0.358112	0.313	0.189	4.78716795158168e-175	1	mm10---Gab3
mm10---Magi3	2.16392567245264e-179	0.302306	0.669	0.668	5.79932080217308e-175	1	mm10---Magi3
mm10---Ndfip1	2.91447318162392e-179	0.283071	0.823	0.868	7.81078812675212e-175	1	mm10---Ndfip1
mm10---4931406P16Rik	2.99404778260823e-179	0.199512	0.473	0.502	8.02404805739007e-175	1	mm10---4931406P16Rik
mm10---Spcs2	3.21180878026588e-179	0.258385	0.376	0.363	8.60764753111256e-175	1	mm10---Spcs2
mm10---Emb	4.26342849354734e-179	0.245954	0.372	0.348	1.14259883627069e-174	1	mm10---Emb
mm10---Slc12a6	6.89712576385626e-179	0.146448	0.605	0.686	1.84842970471348e-174	1	mm10---Slc12a6
mm10---Itfg1	7.2372372952421e-179	0.21618	0.623	0.666	1.93957959512488e-174	1	mm10---Itfg1
mm10---Uqcc1	1.22391803088256e-178	0.110448	0.447	0.528	3.28010032276527e-174	1	mm10---Uqcc1
mm10---Stac2	1.56027737982439e-178	0.36341	0.259	0.096	4.18154337792937e-174	1	mm10---Stac2
mm10---Ksr2	1.60872765991934e-178	0.276345	0.876	0.903	4.31139012858383e-174	1	mm10---Ksr2
mm10---Hdac7	1.6781605748082e-178	0.233328	0.408	0.403	4.49747034048598e-174	1	mm10---Hdac7
mm10---Car11	1.81702417832205e-178	0.102579	0.405	0.493	4.8696247979031e-174	1	mm10---Car11
mm10---Aifm1	1.83834894277532e-178	0.111204	0.403	0.479	4.92677516663786e-174	1	mm10---Aifm1
mm10---Hk1	2.11654994980879e-178	0.113401	0.451	0.533	5.67235386548754e-174	1	mm10---Hk1
mm10---Pnpt1	2.16069456677292e-178	0.12622	0.46	0.538	5.79066143895144e-174	1	mm10---Pnpt1
mm10---Ptprk	2.16641281322042e-178	0.741435	0.377	0.196	5.80598633943073e-174	1	mm10---Ptprk
mm10---Esf1	2.25631676009805e-178	0.124434	0.456	0.531	6.04692891706277e-174	1	mm10---Esf1
mm10---Ube2v2	2.4852447641064e-178	0.150074	0.404	0.453	6.66045596780516e-174	1	mm10---Ube2v2
mm10---Gm38134	3.11269030448354e-178	0.377667	0.455	0.368	8.34201001601589e-174	1	mm10---Gm38134
mm10---Setx	3.92698174356195e-178	0.199426	0.674	0.734	1.0524311072746e-173	1	mm10---Setx
mm10---Carmil1	4.16065087172683e-178	0.313421	0.677	0.652	1.11505443362279e-173	1	mm10---Carmil1
mm10---Clcn3	4.64670266008567e-178	0.187375	0.665	0.728	1.24531631290296e-173	1	mm10---Clcn3
mm10---Gnl3	5.4753386518948e-178	0.160114	0.431	0.479	1.46739075870781e-173	1	mm10---Gnl3
mm10---Rab5b	6.944146188778e-178	0.222743	0.426	0.43	1.8610311785925e-173	1	mm10---Rab5b
mm10---D130043K22Rik	7.35696260975221e-178	0.299593	0.533	0.516	1.97166597941359e-173	1	mm10---D130043K22Rik
mm10---Ppm1g	7.55516229589681e-178	0.157085	0.331	0.366	2.02478349530035e-173	1	mm10---Ppm1g
mm10---Eaf2	7.76005755052766e-178	0.307116	0.375	0.305	2.07969542354141e-173	1	mm10---Eaf2
mm10---Ppip5k2	7.98000602382862e-178	0.126102	0.47	0.543	2.13864161438607e-173	1	mm10---Ppip5k2
mm10---U2surp	1.02378901172124e-177	0.161703	0.756	0.844	2.74375455141293e-173	1	mm10---U2surp
mm10---Crppa	1.12421035328971e-177	0.285197	0.509	0.494	3.01288374681642e-173	1	mm10---Crppa
mm10---Dnajc10	1.12658672084833e-177	0.163114	0.45	0.502	3.01925241187353e-173	1	mm10---Dnajc10
mm10---Clasrp	1.55674557919818e-177	0.121229	0.533	0.624	4.17207815225112e-173	1	mm10---Clasrp
mm10---Mpp7	1.69856908370276e-177	0.327233	0.447	0.377	4.5521651443234e-173	1	mm10---Mpp7
mm10---Yaf2	1.72105409438772e-177	0.101617	0.382	0.46	4.6124249729591e-173	1	mm10---Yaf2
mm10---Mapk8ip1	2.32809271152989e-177	0.136296	0.391	0.458	6.2392884669001e-173	1	mm10---Mapk8ip1
mm10---Fmnl2	2.87106567757837e-177	0.365885	0.795	0.753	7.69445601591003e-173	1	mm10---Fmnl2
mm10---Pex1	2.99008426483036e-177	0.114671	0.379	0.449	8.01342582974537e-173	1	mm10---Pex1
mm10---Sec11a	3.32354021056064e-177	0.11371	0.387	0.459	8.90708776430251e-173	1	mm10---Sec11a
mm10---Dctn4	3.50534672362856e-177	0.137942	0.463	0.535	9.39432921932455e-173	1	mm10---Dctn4
mm10---Tcea1	3.50826576191917e-177	0.108333	0.489	0.581	9.40215224194338e-173	1	mm10---Tcea1
mm10---Pofut1	3.86560919909226e-177	0.208871	0.339	0.332	1.03598326535673e-172	1	mm10---Pofut1
mm10---Mapk8ip3	5.03355739120288e-177	0.120178	0.632	0.727	1.34899338084237e-172	1	mm10---Mapk8ip3
mm10---Polr3h	6.2676723744492e-177	0.278017	0.422	0.387	1.67973619635238e-172	1	mm10---Polr3h
mm10---Gm13629	6.78805266932277e-177	0.312355	0.748	0.76	1.8191981153785e-172	1	mm10---Gm13629
mm10---Sncb	7.01224767078614e-177	0.135398	0.357	0.411	1.87928237577069e-172	1	mm10---Sncb
mm10---Rad17	8.7394537417325e-177	0.138909	0.426	0.484	2.34217360278431e-172	1	mm10---Rad17
mm10---Brd4	8.84312641131149e-177	0.116699	0.682	0.78	2.36995787823148e-172	1	mm10---Brd4
mm10---1810034E14Rik	1.02532804938277e-176	0.348079	0.383	0.288	2.74787917234582e-172	1	mm10---1810034E14Rik
mm10---Rbbp4	1.02978243214496e-176	0.167134	0.402	0.438	2.7598169181485e-172	1	mm10---Rbbp4
mm10---Dalrd3	1.1850162607878e-176	0.136595	0.36	0.412	3.17584357891131e-172	1	mm10---Dalrd3
mm10---Uimc1	1.54584181585878e-176	0.203998	0.426	0.443	4.14285606650153e-172	1	mm10---Uimc1
mm10---Brd9	1.71044690153275e-176	0.200466	0.484	0.515	4.58399769610778e-172	1	mm10---Brd9
mm10---Atp2b4	1.71596296548935e-176	0.436435	0.337	0.159	4.59878074751145e-172	1	mm10---Atp2b4
mm10---Gmcl1	2.08786005586713e-176	0.123624	0.547	0.634	5.5954649497239e-172	1	mm10---Gmcl1
mm10---Mapre2	2.15793259278439e-176	0.186259	0.749	0.814	5.78325934866217e-172	1	mm10---Mapre2
mm10---Pacs1	2.22714507053932e-176	0.252509	0.717	0.758	5.96874878904537e-172	1	mm10---Pacs1
mm10---Crebzf	2.63761551391679e-176	0.100998	0.279	0.338	7.06880957729698e-172	1	mm10---Crebzf
mm10---Ccl25	2.8415360047036e-176	0.117127	0.455	0.536	7.61531649260566e-172	1	mm10---Ccl25
mm10---Iqcb1	3.0877010738848e-176	0.139678	0.481	0.553	8.27503887801125e-172	1	mm10---Iqcb1
mm10---Tmem87b	3.29204710817532e-176	0.112814	0.378	0.451	8.82268624990985e-172	1	mm10---Tmem87b
mm10---Lgals8	4.01341549580685e-176	0.119049	0.378	0.442	1.07559535287624e-171	1	mm10---Lgals8
mm10---Bcap31	4.04725049425162e-176	0.291157	0.379	0.332	1.08466313245943e-171	1	mm10---Bcap31
mm10---Rufy1	4.33263139770562e-176	0.272309	0.475	0.46	1.16114521458511e-171	1	mm10---Rufy1
mm10---Zwint	5.02797259551907e-176	0.148125	0.626	0.711	1.34749665559911e-171	1	mm10---Zwint
mm10---Xpo7	6.50325143311552e-176	0.14889	0.63	0.707	1.74287138407496e-171	1	mm10---Xpo7
mm10---Rsbn1l	9.10012642502429e-176	0.143949	0.418	0.477	2.43883388190651e-171	1	mm10---Rsbn1l
mm10---Ccdc30	1.16180387473479e-175	0.146918	0.568	0.654	3.11363438428923e-171	1	mm10---Ccdc30
mm10---Usp45	1.46757488426086e-175	0.142946	0.631	0.715	3.9331006898191e-171	1	mm10---Usp45
mm10---Ccnh	1.53735384887979e-175	0.206311	0.429	0.446	4.12010831499784e-171	1	mm10---Ccnh
mm10---Zfp704	1.70252956978861e-175	0.189342	0.677	0.738	4.56277924703348e-171	1	mm10---Zfp704
mm10---Golgb1	1.98836400291892e-175	0.140572	0.626	0.713	5.32881552782271e-171	1	mm10---Golgb1
mm10---Kcnc3	2.15124507416782e-175	0.115168	0.352	0.426	5.76533679876975e-171	1	mm10---Kcnc3
mm10---Srcap	2.29099937955195e-175	0.142967	0.619	0.698	6.13987833719922e-171	1	mm10---Srcap
mm10---Smc6	2.44471903111021e-175	0.122839	0.458	0.54	6.55184700337536e-171	1	mm10---Smc6
mm10---Txlng	2.44856002228794e-175	0.110197	0.507	0.604	6.56214085973169e-171	1	mm10---Txlng
mm10---Emc3	2.63528401952154e-175	0.220421	0.406	0.411	7.06256117231772e-171	1	mm10---Emc3
mm10---Trmt11	3.6273341432698e-175	0.109705	0.344	0.41	9.72125550396306e-171	1	mm10---Trmt11
mm10---Numa1	4.35977791463568e-175	0.160126	0.458	0.509	1.16842048112236e-170	1	mm10---Numa1
mm10---Mboat7	4.72208615909541e-175	0.330363	0.347	0.249	1.26551909063757e-170	1	mm10---Mboat7
mm10---Scamp5	5.07154217311378e-175	0.107802	0.488	0.575	1.35917330239449e-170	1	mm10---Scamp5
mm10---Pfkm	5.81756918101792e-175	0.122475	0.372	0.429	1.5591085405128e-170	1	mm10---Pfkm
mm10---Tgs1	6.0461339055322e-175	0.120437	0.387	0.455	1.62036388668263e-170	1	mm10---Tgs1
mm10---Actb	7.09433545876285e-175	0.215085	0.477	0.515	1.90128190294844e-170	1	mm10---Actb
mm10---Arl6ip5	9.25316284322297e-175	0.165871	0.367	0.407	2.47984764198376e-170	1	mm10---Arl6ip5
mm10---Mia3	1.10902722833082e-174	0.149231	0.518	0.589	2.9721929719266e-170	1	mm10---Mia3
mm10---Riok1	1.36891720425331e-174	0.123122	0.383	0.445	3.66869810739888e-170	1	mm10---Riok1
mm10---Ubxn7	1.4072772866317e-174	0.140377	0.424	0.482	3.77150312817297e-170	1	mm10---Ubxn7
mm10---Pfkfb4	1.41932709314914e-174	0.3189	0.35	0.263	3.80379660963971e-170	1	mm10---Pfkfb4
mm10---Rskr	1.64826489734995e-174	0.343885	0.27	0.199	4.41734992489788e-170	1	mm10---Rskr
mm10---Fam120c	1.72033615446378e-174	0.18917	0.504	0.544	4.61050089396293e-170	1	mm10---Fam120c
mm10---Gm47167	1.78718790882132e-174	0.340579	0.398	0.302	4.78966359564115e-170	1	mm10---Gm47167
mm10---Ddx1	1.7953630144377e-174	0.165207	0.423	0.466	4.81157287869304e-170	1	mm10---Ddx1
mm10---Rfx3	1.99445328178142e-174	0.287605	0.605	0.589	5.3451347951742e-170	1	mm10---Rfx3
mm10---Kansl1l	2.20806587060859e-174	0.233466	0.644	0.677	5.91761653323101e-170	1	mm10---Kansl1l
mm10---Hibadh	2.24984791529854e-174	0.107473	0.374	0.445	6.02959241300009e-170	1	mm10---Hibadh
mm10---Cpt1c	2.32736870070759e-174	0.122659	0.434	0.504	6.23734811789634e-170	1	mm10---Cpt1c
mm10---Atxn10	2.53763769933131e-174	0.192496	0.732	0.793	6.80086903420792e-170	1	mm10---Atxn10
mm10---Ubash3b	2.56837264478557e-174	0.417201	0.38	0.182	6.88323868802533e-170	1	mm10---Ubash3b
mm10---Tmem135	4.20866908773575e-174	0.106944	0.631	0.73	1.12792331551318e-169	1	mm10---Tmem135
mm10---Cnot4	4.40582859661781e-174	0.204636	0.788	0.846	1.18076206389357e-169	1	mm10---Cnot4
mm10---Ppp1r14c	4.40903815590068e-174	0.245059	0.41	0.401	1.18162222578138e-169	1	mm10---Ppp1r14c
mm10---Nae1	5.72188542238257e-174	0.136905	0.455	0.523	1.53346529319853e-169	1	mm10---Nae1
mm10---Basp1	7.70204732573956e-174	0.282983	0.621	0.627	2.0641486832982e-169	1	mm10---Basp1
mm10---Atp5a1	8.30368935904563e-174	0.110197	0.373	0.447	2.22538874822423e-169	1	mm10---Atp5a1
mm10---Tgfbr3	8.61499959971579e-174	0.310674	0.411	0.352	2.30881989272383e-169	1	mm10---Tgfbr3
mm10---Aco2	1.14564852460256e-173	0.115074	0.607	0.7	3.07033804593487e-169	1	mm10---Aco2
mm10---Pdcd7	1.16507663862437e-173	0.291872	0.266	0.167	3.12240539151331e-169	1	mm10---Pdcd7
mm10---Zfp30	1.61597798101241e-173	0.31275	0.363	0.287	4.33082098911327e-169	1	mm10---Zfp30
mm10---Zfp654	1.67512062459179e-173	0.123267	0.47	0.551	4.48932327390601e-169	1	mm10---Zfp654
mm10---Hnrnpdl	1.8567951650594e-173	0.102105	0.628	0.736	4.97621104235919e-169	1	mm10---Hnrnpdl
mm10---Wdr78	1.8663240565915e-173	0.180438	0.307	0.324	5.00174847166523e-169	1	mm10---Wdr78
mm10---Tsnax	1.952442770508e-173	0.10843	0.353	0.421	5.23254662496144e-169	1	mm10---Tsnax
mm10---Eml5	1.95605157522322e-173	0.203368	0.736	0.794	5.24221822159822e-169	1	mm10---Eml5
mm10---Syt11	2.5406809775181e-173	0.239291	0.777	0.83	6.80902501974852e-169	1	mm10---Syt11
mm10---D430042O09Rik	3.00124577675949e-173	0.115665	0.477	0.563	8.04333868171544e-169	1	mm10---D430042O09Rik
mm10---Csrnp3	3.18224198990375e-173	0.245478	0.835	0.879	8.52840853294205e-169	1	mm10---Csrnp3
mm10---Gm37679	4.69440126922819e-173	0.308711	0.456	0.412	1.25809954015315e-168	1	mm10---Gm37679
mm10---4833420G17Rik	6.28052438729952e-173	0.154724	0.505	0.563	1.68318053579627e-168	1	mm10---4833420G17Rik
mm10---Radil	6.30295036512742e-173	0.367864	0.392	0.27	1.68919069785415e-168	1	mm10---Radil
mm10---Tbc1d24	1.08305862741383e-172	0.145136	0.398	0.446	2.90259712146908e-168	1	mm10---Tbc1d24
mm10---Os9	1.21484414811651e-172	0.108304	0.427	0.508	3.25578231695224e-168	1	mm10---Os9
mm10---Vcl	1.27044801368518e-172	0.147486	0.356	0.399	3.40480067667629e-168	1	mm10---Vcl
mm10---Dcaf7	1.47602106223164e-172	0.168615	0.403	0.447	3.95573644678078e-168	1	mm10---Dcaf7
mm10---9530077C05Rik	1.55835415633937e-172	0.324894	0.325	0.22	4.17638913898951e-168	1	mm10---9530077C05Rik
mm10---Atp9a	1.61191449422914e-172	0.195573	0.7	0.763	4.31993084453409e-168	1	mm10---Atp9a
mm10---Ankrd12	1.81505585925254e-172	0.252004	0.866	0.906	4.86434970279681e-168	1	mm10---Ankrd12
mm10---Tmem243	1.98777503021812e-172	0.297585	0.479	0.446	5.32723708098456e-168	1	mm10---Tmem243
mm10---Cbfa2t2	2.12357693112122e-172	0.204833	0.675	0.722	5.69118617540487e-168	1	mm10---Cbfa2t2
mm10---Zfp933	2.23819425832136e-172	0.186371	0.373	0.384	5.99836061230125e-168	1	mm10---Zfp933
mm10---Stambpl1	2.52289523855852e-172	0.244049	0.387	0.366	6.76135923933684e-168	1	mm10---Stambpl1
mm10---Ddrgk1	3.13856491859435e-172	0.263385	0.338	0.3	8.41135398183286e-168	1	mm10---Ddrgk1
mm10---Atp5j2	5.98410925804098e-172	0.256995	0.33	0.286	1.60374128115498e-167	1	mm10---Atp5j2
mm10---Fktn	7.60255218766061e-172	0.163738	0.443	0.489	2.03748398629304e-167	1	mm10---Fktn
mm10---Aarsd1	1.25079570078323e-171	0.244584	0.356	0.324	3.35213247809907e-167	1	mm10---Aarsd1
mm10---Ankhd1	1.34043336805053e-171	0.153147	0.729	0.812	3.59236142637543e-167	1	mm10---Ankhd1
mm10---Leng8	1.47747601891451e-171	0.117568	0.629	0.722	3.95963573069089e-167	1	mm10---Leng8
mm10---Gm36388	2.41713469972815e-171	0.285521	0.335	0.263	6.47792099527143e-167	1	mm10---Gm36388
mm10---Xpr1	2.46088317898687e-171	0.171639	0.603	0.665	6.5951669196848e-167	1	mm10---Xpr1
mm10---Tmem147	2.81734395613513e-171	0.302617	0.328	0.256	7.55048180244214e-167	1	mm10---Tmem147
mm10---Cenpv	3.189041307804e-171	0.199118	0.376	0.399	8.54663070491471e-167	1	mm10---Cenpv
mm10---Sf3b6	3.23954393021447e-171	0.228941	0.407	0.402	8.68197773297479e-167	1	mm10---Sf3b6
mm10---Wdr45b	3.28687917753253e-171	0.101635	0.341	0.413	8.80883619578718e-167	1	mm10---Wdr45b
mm10---Stx7	3.34553087289488e-171	0.141475	0.335	0.379	8.96602273935828e-167	1	mm10---Stx7
mm10---Tbce	3.69686056477879e-171	0.144468	0.59	0.665	9.90758631360717e-167	1	mm10---Tbce
mm10---Grin3a	4.71020044421948e-171	0.486266	0.704	0.542	1.26233371905082e-166	1	mm10---Grin3a
mm10---Nsg2	5.62430251799802e-171	0.240147	0.605	0.638	1.50731307482347e-166	1	mm10---Nsg2
mm10---Cherp	6.39147931734589e-171	0.112374	0.323	0.385	1.7129164570487e-166	1	mm10---Cherp
mm10---Fbxo10	6.47038406118975e-171	0.21003	0.407	0.427	1.73406292839885e-166	1	mm10---Fbxo10
mm10---Pitpnb	7.6344603709668e-171	0.139885	0.387	0.438	2.0460353794191e-166	1	mm10---Pitpnb
mm10---Dpysl2	8.25725384015938e-171	0.172869	0.748	0.819	2.21294402916271e-166	1	mm10---Dpysl2
mm10---Trim33	9.26476296427279e-171	0.103401	0.561	0.655	2.48295647442511e-166	1	mm10---Trim33
mm10---Rpl30	9.98301224746515e-171	0.104313	0.26	0.315	2.67544728232066e-166	1	mm10---Rpl30
mm10---Scg3	1.08873724964031e-170	0.380666	0.445	0.331	2.91781582903603e-166	1	mm10---Scg3
mm10---Mrpl38	1.10118145946917e-170	0.271337	0.345	0.295	2.95116631137738e-166	1	mm10---Mrpl38
mm10---Arid4b	1.11575381100791e-170	0.217239	0.796	0.849	2.9902202135012e-166	1	mm10---Arid4b
mm10---Smim14	1.11677409645796e-170	0.19794	0.787	0.856	2.99295457850735e-166	1	mm10---Smim14
mm10---Cul5	1.60339465305565e-170	0.105139	0.564	0.664	4.29709767018915e-166	1	mm10---Cul5
mm10---Pick1	1.63656725088111e-170	0.137847	0.347	0.393	4.38600023236138e-166	1	mm10---Pick1
mm10---Cspg5	1.74753654816691e-170	0.113394	0.442	0.528	4.68339794908731e-166	1	mm10---Cspg5
mm10---Bcl2l13	1.8821099416439e-170	0.106533	0.294	0.354	5.04405464360565e-166	1	mm10---Bcl2l13
mm10---D030068K23Rik	2.00186429165866e-170	0.573711	0.408	0.231	5.36499630164521e-166	1	mm10---D030068K23Rik
mm10---Usp47	2.32087583211208e-170	0.129087	0.566	0.649	6.21994723006038e-166	1	mm10---Usp47
mm10---Exoc7	2.34616082706984e-170	0.197144	0.324	0.326	6.28771101654716e-166	1	mm10---Exoc7
mm10---Rpn1	2.56939485538008e-170	0.24683	0.318	0.29	6.88597821241862e-166	1	mm10---Rpn1
mm10---Dennd4a	3.3099865385049e-170	0.206121	0.731	0.786	8.87076392319312e-166	1	mm10---Dennd4a
mm10---Flywch1	4.97831499208641e-170	0.125544	0.501	0.579	1.33418841787916e-165	1	mm10---Flywch1
mm10---Fam173a	6.80412673477019e-170	0.274418	0.391	0.354	1.82350596491841e-165	1	mm10---Fam173a
mm10---Tcp11l1	6.96317299438163e-170	0.105811	0.561	0.653	1.86613036249428e-165	1	mm10---Tcp11l1
mm10---Cdk13	7.90667671632978e-170	0.114618	0.643	0.738	2.11898935997638e-165	1	mm10---Cdk13
mm10---Dipk1a	1.11466593629317e-169	0.187313	0.407	0.431	2.9873047092657e-165	1	mm10---Dipk1a
mm10---Lrp1	1.52616978418371e-169	0.135453	0.529	0.602	4.09013502161233e-165	1	mm10---Lrp1
mm10---Zdhhc1	2.14920920125036e-169	0.120295	0.345	0.404	5.75988065935097e-165	1	mm10---Zdhhc1
mm10---Wdr12	2.48974997896753e-169	0.13092	0.345	0.396	6.67252994363299e-165	1	mm10---Wdr12
mm10---Cachd1	2.66785690052704e-169	0.185615	0.603	0.678	7.14985649341248e-165	1	mm10---Cachd1
mm10---Rab28	2.90412842118647e-169	0.114726	0.525	0.607	7.78306416877973e-165	1	mm10---Rab28
mm10---Tm9sf2	2.96431405810866e-169	0.102288	0.392	0.469	7.94436167573122e-165	1	mm10---Tm9sf2
mm10---Heatr6	4.06932140506775e-169	0.170989	0.352	0.379	1.09057813655816e-164	1	mm10---Heatr6
mm10---Faf2	7.91054550969579e-169	0.136957	0.465	0.53	2.12002619659847e-164	1	mm10---Faf2
mm10---Asph	9.3773616221033e-169	0.153739	0.534	0.595	2.51313291472368e-164	1	mm10---Asph
mm10---Reep5	1.0509667012423e-168	0.213044	0.517	0.553	2.81659075932937e-164	1	mm10---Reep5
mm10---Sar1b	1.17364558416329e-168	0.115584	0.375	0.445	3.14537016555762e-164	1	mm10---Sar1b
mm10---Tmem184b	1.21524499891724e-168	0.105328	0.405	0.483	3.2568565970982e-164	1	mm10---Tmem184b
mm10---Plpbp	1.50678319269787e-168	0.153555	0.374	0.413	4.0381789564303e-164	1	mm10---Plpbp
mm10---Bbs4	1.69121281232362e-168	0.190076	0.345	0.351	4.53245033702731e-164	1	mm10---Bbs4
mm10---Srsf11	2.08838050109311e-168	0.268402	0.886	0.917	5.59685974292953e-164	1	mm10---Srsf11
mm10---Dgkd	2.12817509389614e-168	0.193897	0.476	0.506	5.70350925164165e-164	1	mm10---Dgkd
mm10---St8sia1	2.22344710704489e-168	0.120996	0.476	0.555	5.95883824688029e-164	1	mm10---St8sia1
mm10---Slc38a9	2.28495206968502e-168	0.116143	0.565	0.658	6.12367154675585e-164	1	mm10---Slc38a9
mm10---Frg1	2.37256256323401e-168	0.218504	0.357	0.347	6.35846766946716e-164	1	mm10---Frg1
mm10---Acat1	3.35145343959627e-168	0.187547	0.644	0.706	8.981895218118e-164	1	mm10---Acat1
mm10---Dgat1	3.8362405689934e-168	0.113183	0.352	0.415	1.02811247249023e-163	1	mm10---Dgat1
mm10---Syngr3	3.84536452076279e-168	0.254988	0.42	0.414	1.03055769156443e-163	1	mm10---Syngr3
mm10---Ep300	4.21983944727091e-168	0.104243	0.566	0.663	1.1309169718686e-163	1	mm10---Ep300
mm10---Runx1t1	4.32080227618565e-168	0.238369	0.732	0.796	1.15797501001775e-163	1	mm10---Runx1t1
mm10---Mrpl41	4.48518966029303e-168	0.228434	0.333	0.326	1.20203082895853e-163	1	mm10---Mrpl41
mm10---Robo2	4.74621485881623e-168	0.467409	0.801	0.646	1.27198558216275e-163	1	mm10---Robo2
mm10---Tnpo1	5.90764242859283e-168	0.122198	0.496	0.577	1.58324817086288e-163	1	mm10---Tnpo1
mm10---Pdhb	7.55813562509145e-168	0.145268	0.333	0.367	2.02558034752451e-163	1	mm10---Pdhb
mm10---Idh3b	8.58464186454186e-168	0.204983	0.356	0.353	2.30068401969722e-163	1	mm10---Idh3b
mm10---Ift20	1.16300093241413e-167	0.177755	0.363	0.388	3.11684249886987e-163	1	mm10---Ift20
mm10---Flvcr1	1.32618730232596e-167	0.16443	0.356	0.385	3.55418197023357e-163	1	mm10---Flvcr1
mm10---Hook3	1.37510352200831e-167	0.160054	0.737	0.813	3.68527743898228e-163	1	mm10---Hook3
mm10---Inpp5f	1.44097085258783e-167	0.239966	0.449	0.434	3.8618018849354e-163	1	mm10---Inpp5f
mm10---Nsd1	1.49348485015418e-167	0.265321	0.893	0.924	4.0025393984132e-163	1	mm10---Nsd1
mm10---BC052040	1.59416317277673e-167	0.220491	0.461	0.477	4.27235730304164e-163	1	mm10---BC052040
mm10---Sec24b	1.59553212019202e-167	0.147619	0.685	0.76	4.2760260821146e-163	1	mm10---Sec24b
mm10---Stau1	2.17514948954891e-167	0.109444	0.332	0.392	5.82940063199108e-163	1	mm10---Stau1
mm10---Bdh1	2.53823789102268e-167	0.135235	0.347	0.396	6.80247754794079e-163	1	mm10---Bdh1
mm10---Zfp329	2.79944372327487e-167	0.144729	0.429	0.477	7.50250917837665e-163	1	mm10---Zfp329
mm10---Senp8	2.92581361354399e-167	0.320704	0.399	0.327	7.8411804842979e-163	1	mm10---Senp8
mm10---Zmym2	3.00719716567712e-167	0.121758	0.664	0.76	8.05928840401468e-163	1	mm10---Zmym2
mm10---Mrps15	3.34492606661247e-167	0.147868	0.281	0.307	8.96440185852142e-163	1	mm10---Mrps15
mm10---Tacc2	3.50229707833448e-167	0.110472	0.39	0.457	9.3861561699364e-163	1	mm10---Tacc2
mm10---Cntnap4	3.79431643156246e-167	0.464481	0.647	0.546	1.01687680365874e-162	1	mm10---Cntnap4
mm10---Ccdc66	3.92118985683416e-167	0.171398	0.354	0.382	1.05087888163155e-162	1	mm10---Ccdc66
mm10---Agk	4.00677894151662e-167	0.153813	0.452	0.505	1.07381675632646e-162	1	mm10---Agk
mm10---Gls2	4.69447333649057e-167	0.210424	0.369	0.371	1.25811885417947e-162	1	mm10---Gls2
mm10---Secisbp2	4.77174269849114e-167	0.187035	0.401	0.423	1.27882704319562e-162	1	mm10---Secisbp2
mm10---Limk1	6.26240601511682e-167	0.226177	0.333	0.312	1.67832481205131e-162	1	mm10---Limk1
mm10---Fam184a	6.69667691068319e-167	0.180468	0.478	0.519	1.79470941206309e-162	1	mm10---Fam184a
mm10---Wdr60	7.46594534840645e-167	0.121317	0.477	0.552	2.00087335337293e-162	1	mm10---Wdr60
mm10---Ldb2	7.88456251984896e-167	0.29892	0.645	0.424	2.11306275531952e-162	1	mm10---Ldb2
mm10---Lancl1	9.31819544155995e-167	0.159635	0.453	0.498	2.49727637833807e-162	1	mm10---Lancl1
mm10---Igdcc4	1.06365605804292e-166	0.344073	0.374	0.254	2.85059823555503e-162	1	mm10---Igdcc4
mm10---Baz2b	1.22052257945674e-166	0.19246	0.776	0.843	3.27100051294406e-162	1	mm10---Baz2b
mm10---Poglut1	1.47763920003057e-166	0.181001	0.356	0.371	3.96007305608192e-162	1	mm10---Poglut1
mm10---Ube2l3	1.78223754131502e-166	0.108556	0.358	0.421	4.77639661072426e-162	1	mm10---Ube2l3
mm10---Slc9a7	2.01390681284577e-166	0.101301	0.592	0.689	5.39727025842665e-162	1	mm10---Slc9a7
mm10---Zdhhc20	2.18963663512637e-166	0.240909	0.661	0.68	5.86822618213867e-162	1	mm10---Zdhhc20
mm10---Ergic3	2.29367663108093e-166	0.276908	0.326	0.273	6.14705337129688e-162	1	mm10---Ergic3
mm10---Pianp	2.73832984785827e-166	0.138058	0.297	0.34	7.33872399226018e-162	1	mm10---Pianp
mm10---Rpl6	2.9257943200889e-166	0.246316	0.412	0.405	7.84112877783825e-162	1	mm10---Rpl6
mm10---Rbm3	3.29251712153437e-166	0.115827	0.334	0.396	8.8239458857121e-162	1	mm10---Rbm3
mm10---Pcm1	3.47383904850389e-166	0.179122	0.805	0.873	9.30988864999043e-162	1	mm10---Pcm1
mm10---Atp13a2	3.52637908320033e-166	0.115499	0.364	0.425	9.45069594297688e-162	1	mm10---Atp13a2
mm10---Nprl3	3.97388608717107e-166	0.101072	0.344	0.415	1.06500147136185e-161	1	mm10---Nprl3
mm10---Rnf227	4.64085862381382e-166	0.342017	0.325	0.229	1.2437501111821e-161	1	mm10---Rnf227
mm10---Clptm1	4.86868903134494e-166	0.160533	0.38	0.416	1.30480866040044e-161	1	mm10---Clptm1
mm10---Tspyl2	5.31492935196917e-166	0.19921	0.391	0.402	1.42440106632774e-161	1	mm10---Tspyl2
mm10---Zmym6	5.60827401760546e-166	0.16816	0.442	0.484	1.50301743671826e-161	1	mm10---Zmym6
mm10---Stxbp5	5.74749880970606e-166	0.175659	0.592	0.642	1.54032968100122e-161	1	mm10---Stxbp5
mm10---Gm11149	6.09957859951496e-166	0.372772	0.435	0.33	1.63468706467001e-161	1	mm10---Gm11149
mm10---Rexo1	8.42881488366064e-166	0.163202	0.348	0.372	2.25892238882105e-161	1	mm10---Rexo1
mm10---Gcc2	9.30674235981791e-166	0.163222	0.565	0.625	2.4942069524312e-161	1	mm10---Gcc2
mm10---Gm43713	1.27169095081311e-165	0.272297	0.399	0.352	3.40813174817915e-161	1	mm10---Gm43713
mm10---Ufd1	1.72413467893133e-165	0.100936	0.35	0.42	4.62068093953598e-161	1	mm10---Ufd1
mm10---Atcay	2.22585955446413e-165	0.138688	0.503	0.576	5.96530360596386e-161	1	mm10---Atcay
mm10---Ctnnbl1	2.52206898119558e-165	0.120467	0.364	0.424	6.75914486960415e-161	1	mm10---Ctnnbl1
mm10---Polr3a	2.60112677747315e-165	0.14128	0.348	0.384	6.97101976362803e-161	1	mm10---Polr3a
mm10---Mpp5	3.23085059462707e-165	0.347826	0.41	0.304	8.65867959360056e-161	1	mm10---Mpp5
mm10---Rnf34	4.11164544696356e-165	0.202302	0.377	0.387	1.10192097978623e-160	1	mm10---Rnf34
mm10---Zfp266	5.62686060559097e-165	0.121695	0.509	0.587	1.50799864229838e-160	1	mm10---Zfp266
mm10---Atp5f1	5.72094378563629e-165	0.116168	0.354	0.413	1.53321293455053e-160	1	mm10---Atp5f1
mm10---Ivd	5.8682454358154e-165	0.226442	0.323	0.305	1.57268977679853e-160	1	mm10---Ivd
mm10---Prdm2	6.11838778882501e-165	0.141805	0.443	0.495	1.6397279274051e-160	1	mm10---Prdm2
mm10---Bcat1	7.4810609589893e-165	0.253997	0.363	0.322	2.00492433700913e-160	1	mm10---Bcat1
mm10---Mrps10	7.96841097072011e-165	0.257077	0.381	0.346	2.13553414015299e-160	1	mm10---Mrps10
mm10---Ift52	8.05963216980829e-165	0.190693	0.338	0.348	2.15998142150862e-160	1	mm10---Ift52
mm10---Enpp5	8.55787242308847e-165	0.269524	0.373	0.332	2.29350980938771e-160	1	mm10---Enpp5
mm10---Acbd6	8.80131739307019e-165	0.153116	0.66	0.734	2.35875306134281e-160	1	mm10---Acbd6
mm10---Prdx2	9.59146951618955e-165	0.235769	0.388	0.389	2.5705138303388e-160	1	mm10---Prdx2
mm10---Nck1	1.06420293502784e-164	0.12017	0.293	0.337	2.85206386587462e-160	1	mm10---Nck1
mm10---Dtd1	1.27335827431525e-164	0.199886	0.68	0.735	3.41260017516487e-160	1	mm10---Dtd1
mm10---Got2	1.33207400899738e-164	0.106065	0.413	0.489	3.56995834411297e-160	1	mm10---Got2
mm10---Lpp	1.49300361798616e-164	0.350493	0.503	0.422	4.0012496962029e-160	1	mm10---Lpp
mm10---Taf3	1.50213492573567e-164	0.126726	0.418	0.486	4.0257216009716e-160	1	mm10---Taf3
mm10---Hprt	1.59874510203712e-164	0.163269	0.347	0.373	4.28463687345949e-160	1	mm10---Hprt
mm10---Snx21	1.64044654917028e-164	0.122548	0.34	0.401	4.39639675177635e-160	1	mm10---Snx21
mm10---Mob4	1.87594594787581e-164	0.147685	0.354	0.392	5.02753514030716e-160	1	mm10---Mob4
mm10---Araf	1.88625359643338e-164	0.322503	0.569	0.523	5.05515963844147e-160	1	mm10---Araf
mm10---Morn1	1.91802127361027e-164	0.132551	0.331	0.38	5.14029701327552e-160	1	mm10---Morn1
mm10---Zfp280c	2.1993520526746e-164	0.172108	0.507	0.547	5.89426350116793e-160	1	mm10---Zfp280c
mm10---Nfx1	2.71250782333912e-164	0.126199	0.628	0.715	7.26952096654883e-160	1	mm10---Nfx1
mm10---9930021J03Rik	3.31761502354637e-164	0.134032	0.619	0.706	8.89120826310428e-160	1	mm10---9930021J03Rik
mm10---Dnajb4	3.5316091873196e-164	0.122484	0.395	0.456	9.46471262201653e-160	1	mm10---Dnajb4
mm10---Dynlt1a	3.69746662940614e-164	0.335336	0.298	0.167	9.90921056680845e-160	1	mm10---Dynlt1a
mm10---Glrx3	3.76400806286204e-164	0.104551	0.291	0.35	1.00875416084703e-159	1	mm10---Glrx3
mm10---Nrg3os	3.92403632752598e-164	0.354369	0.93	0.892	1.05164173577696e-159	1	mm10---Nrg3os
mm10---Eif1	4.50774446570656e-164	0.198925	0.419	0.447	1.20807551680936e-159	1	mm10---Eif1
mm10---Pxk	4.67844645602779e-164	0.144615	0.548	0.615	1.25382365021545e-159	1	mm10---Pxk
mm10---Bcas2	4.95989114579504e-164	0.166553	0.29	0.304	1.32925082707307e-159	1	mm10---Bcas2
mm10---Mdm4	5.43843921910532e-164	0.128548	0.655	0.741	1.45750171072023e-159	1	mm10---Mdm4
mm10---Slc6a15	6.12847327464568e-164	0.348677	0.449	0.346	1.64243083760504e-159	1	mm10---Slc6a15
mm10---Unc13c	6.47384879213104e-164	0.586491	0.716	0.672	1.73499147629112e-159	1	mm10---Unc13c
mm10---Rbl2	6.95310121684368e-164	0.191544	0.389	0.4	1.86343112611411e-159	1	mm10---Rbl2
mm10---Zfp182	7.19063612576492e-164	0.187523	0.395	0.424	1.927090481705e-159	1	mm10---Zfp182
mm10---Pcgf5	9.56774061618265e-164	0.211813	0.522	0.563	2.56415448513695e-159	1	mm10---Pcgf5
mm10---Scn2b	9.65884258865498e-164	0.111489	0.364	0.433	2.58856981375953e-159	1	mm10---Scn2b
mm10---Klhl7	1.08041746715084e-163	0.14427	0.63	0.704	2.89551881196426e-159	1	mm10---Klhl7
mm10---Spop	2.1845245816731e-163	0.141719	0.635	0.717	5.8545258788839e-159	1	mm10---Spop
mm10---Ecsit	2.38622134776138e-163	0.174416	0.34	0.36	6.39507321200049e-159	1	mm10---Ecsit
mm10---Fbxw2	2.54076181424276e-163	0.122768	0.386	0.441	6.8092416621706e-159	1	mm10---Fbxw2
mm10---Fam169a	3.2371761181641e-163	0.228095	0.404	0.397	8.67563199667978e-159	1	mm10---Fam169a
mm10---N4bp1	3.36184851933183e-163	0.103094	0.29	0.344	9.00975403180931e-159	1	mm10---N4bp1
mm10---Atad3a	3.42754420455727e-163	0.103245	0.341	0.405	9.1858184682135e-159	1	mm10---Atad3a
mm10---Fndc3a	3.47474744830535e-163	0.195723	0.606	0.678	9.31232316145834e-159	1	mm10---Fndc3a
mm10---Chid1	3.55365499151572e-163	0.20225	0.331	0.321	9.52379537726214e-159	1	mm10---Chid1
mm10---Maged1	3.9858687279829e-163	0.220266	0.427	0.427	1.06821281909942e-158	1	mm10---Maged1
mm10---Prmt7	4.84018810414528e-163	0.160361	0.401	0.436	1.29717041191093e-158	1	mm10---Prmt7
mm10---Gm11508	9.45701370258801e-163	0.277282	0.353	0.318	2.53447967229359e-158	1	mm10---Gm11508
mm10---Arf4	1.04053251699468e-162	0.16827	0.391	0.427	2.78862714554573e-158	1	mm10---Arf4
mm10---Tiprl	1.05668725172058e-162	0.198103	0.359	0.359	2.83192183461116e-158	1	mm10---Tiprl
mm10---Svop	1.22449773051017e-162	0.170315	0.595	0.656	3.28165391776726e-158	1	mm10---Svop
mm10---Atp5l	1.34011282565944e-162	0.146189	0.337	0.372	3.5915023727673e-158	1	mm10---Atp5l
mm10---Cmip	1.52142348838365e-162	0.26156	0.818	0.845	4.07741494886818e-158	1	mm10---Cmip
mm10---Pip4p2	1.62475422846493e-162	0.128781	0.386	0.442	4.35434133228602e-158	1	mm10---Pip4p2
mm10---Chfr	2.37896025273222e-162	0.111848	0.661	0.756	6.37561347732235e-158	1	mm10---Chfr
mm10---Klhl12	2.45698928792636e-162	0.131317	0.354	0.413	6.58473129164266e-158	1	mm10---Klhl12
mm10---Usp9x	2.91830667176229e-162	0.135868	0.725	0.811	7.82106188032293e-158	1	mm10---Usp9x
mm10---Ccdc28a	6.66462497232991e-162	0.166519	0.349	0.38	1.78611949258442e-157	1	mm10---Ccdc28a
mm10---Tmco3	8.53858877960466e-162	0.106385	0.352	0.414	2.28834179293405e-157	1	mm10---Tmco3
mm10---Nceh1	8.79825791258103e-162	0.214044	0.597	0.632	2.35793312057172e-157	1	mm10---Nceh1
mm10---Abi2	9.47702270700814e-162	0.11607	0.603	0.696	2.53984208547818e-157	1	mm10---Abi2
mm10---Atg3	1.10997281005747e-161	0.134549	0.38	0.425	2.97472713095402e-157	1	mm10---Atg3
mm10---Acin1	1.28960782341914e-161	0.110834	0.708	0.805	3.45614896676331e-157	1	mm10---Acin1
mm10---Zhx3	1.38059595577438e-161	0.119403	0.43	0.504	3.69999716147533e-157	1	mm10---Zhx3
mm10---Hip1	1.40079566867572e-161	0.412849	0.416	0.248	3.75413239205093e-157	1	mm10---Hip1
mm10---Nat8l	1.40500141061086e-161	0.171248	0.278	0.288	3.7654037804371e-157	1	mm10---Nat8l
mm10---Rnf38	1.46491318715455e-161	0.129431	0.43	0.492	3.92596734157419e-157	1	mm10---Rnf38
mm10---Sdf4	1.47224382456734e-161	0.178353	0.332	0.344	3.94561344984047e-157	1	mm10---Sdf4
mm10---Pnpla6	2.03796493826162e-161	0.131002	0.304	0.338	5.46174603454114e-157	1	mm10---Pnpla6
mm10---Cox7b	2.04869665778164e-161	0.15625	0.363	0.396	5.49050704285479e-157	1	mm10---Cox7b
mm10---Dnajc27	2.99695663469683e-161	0.115141	0.28	0.326	8.03184378098751e-157	1	mm10---Dnajc27
mm10---Taok3	3.21596760593955e-161	0.122351	0.552	0.636	8.61879318391799e-157	1	mm10---Taok3
mm10---Rhbdd2	3.78114133862049e-161	0.257935	0.294	0.244	1.01334587875029e-156	1	mm10---Rhbdd2
mm10---Abat	3.87977534358674e-161	0.201073	0.494	0.522	1.03977979208125e-156	1	mm10---Abat
mm10---Gm7854	3.91885384116739e-161	0.363892	0.367	0.282	1.05025282943286e-156	1	mm10---Gm7854
mm10---Ube2h	3.96333635438797e-161	0.131403	0.661	0.751	1.06217414297598e-156	1	mm10---Ube2h
mm10---Mkrn1	4.28049317673288e-161	0.101761	0.327	0.389	1.14717217136441e-156	1	mm10---Mkrn1
mm10---Vmn2r87	5.92238644088377e-161	0.301375	0.293	0.198	1.58719956615685e-156	1	mm10---Vmn2r87
mm10---Map2k1	6.34785491848702e-161	0.168323	0.374	0.408	1.70122511815452e-156	1	mm10---Map2k1
mm10---Ccdc34	6.79125106365736e-161	0.21311	0.366	0.382	1.82005528506017e-156	1	mm10---Ccdc34
mm10---Akap8l	6.83088268379774e-161	0.211746	0.863	0.912	1.8306765592578e-156	1	mm10---Akap8l
mm10---Itm2c	7.01004122369163e-161	0.382882	0.509	0.427	1.87869104794936e-156	1	mm10---Itm2c
mm10---Psmd9	8.64718624094579e-161	0.216159	0.389	0.392	2.31744591257347e-156	1	mm10---Psmd9
mm10---Clip4	9.40425876555348e-161	0.197764	0.327	0.315	2.52034134916833e-156	1	mm10---Clip4
mm10---Uqcrc1	9.45603765040366e-161	0.147973	0.334	0.364	2.53421809030818e-156	1	mm10---Uqcrc1
mm10---Vkorc1l1	9.9947289266989e-161	0.192988	0.373	0.389	2.6785873523553e-156	1	mm10---Vkorc1l1
mm10---H13	1.01784684007353e-160	0.167352	0.408	0.445	2.72782953139707e-156	1	mm10---H13
mm10---Rufy2	1.0661324254051e-160	0.129463	0.694	0.78	2.85723490008566e-156	1	mm10---Rufy2
mm10---Fsd1	1.142477823778e-160	0.164667	0.397	0.435	3.06184056772505e-156	1	mm10---Fsd1
mm10---Man1b1	1.19387783079486e-160	0.103002	0.314	0.375	3.19959258653021e-156	1	mm10---Man1b1
mm10---Sp4	1.2851015149176e-160	0.180893	0.414	0.439	3.44407205997916e-156	1	mm10---Sp4
mm10---Znhit6	1.29986212841975e-160	0.150331	0.345	0.378	3.48363050416492e-156	1	mm10---Znhit6
mm10---Tnfrsf21	1.38046684096002e-160	0.200272	0.345	0.337	3.69965113377285e-156	1	mm10---Tnfrsf21
mm10---Abca5	1.41725278026676e-160	0.122035	0.56	0.641	3.79823745111492e-156	1	mm10---Abca5
mm10---Gm45323	1.98307871059949e-160	0.551108	0.498	0.317	5.31465094440663e-156	1	mm10---Gm45323
mm10---Ndufb1-ps	2.33693712308731e-160	0.217643	0.297	0.283	6.26299148987399e-156	1	mm10---Ndufb1-ps
mm10---Erg28	2.43746118275495e-160	0.197609	0.322	0.329	6.53239596978325e-156	1	mm10---Erg28
mm10---Trim37	2.83342526097684e-160	0.138922	0.692	0.775	7.59357969941792e-156	1	mm10---Trim37
mm10---Slc45a1	2.99998394224892e-160	0.125016	0.396	0.453	8.03995696522711e-156	1	mm10---Slc45a1
mm10---Rchy1	3.22527950546352e-160	0.180729	0.461	0.494	8.64374907464223e-156	1	mm10---Rchy1
mm10---Glra3	3.5122446646321e-160	0.44659	0.485	0.275	9.41281570121403e-156	1	mm10---Glra3
mm10---D3Ertd751e	3.56278455956608e-160	0.253375	0.36	0.334	9.54826261963711e-156	1	mm10---D3Ertd751e
mm10---Rbis	3.94056741520838e-160	0.228871	0.352	0.329	1.05607206727585e-155	1	mm10---Rbis
mm10---Rps13	4.42018030575806e-160	0.226105	0.374	0.36	1.18460832194316e-155	1	mm10---Rps13
mm10---Immp2l	6.27967848125842e-160	0.332574	0.773	0.772	1.68295383297726e-155	1	mm10---Immp2l
mm10---Malsu1	6.36230924598156e-160	0.179597	0.34	0.344	1.70509887792306e-155	1	mm10---Malsu1
mm10---Clpp	9.85525981069264e-160	0.217677	0.416	0.417	2.64120962926563e-155	1	mm10---Clpp
mm10---Dus2	1.07826021119146e-159	0.112769	0.343	0.399	2.88973736599313e-155	1	mm10---Dus2
mm10---Ppia	1.23932814127703e-159	0.184877	0.378	0.401	3.32139941862245e-155	1	mm10---Ppia
mm10---Tet3	1.40661136838019e-159	0.149632	0.544	0.611	3.76971846725892e-155	1	mm10---Tet3
mm10---Gprasp2	1.57138958584553e-159	0.233022	0.361	0.349	4.21132409006603e-155	1	mm10---Gprasp2
mm10---Lncenc1	1.57967892600741e-159	0.423328	0.316	0.168	4.23353952169987e-155	1	mm10---Lncenc1
mm10---Clvs2	2.28252352496553e-159	0.100484	0.519	0.611	6.11716304690763e-155	1	mm10---Clvs2
mm10---Mga	2.33185761713391e-159	0.125887	0.472	0.545	6.24937841391889e-155	1	mm10---Mga
mm10---Gm32036	2.38284614918429e-159	0.336083	0.268	0.144	6.3860276798139e-155	1	mm10---Gm32036
mm10---Clcn6	2.53860609361792e-159	0.127461	0.309	0.354	6.80346433089604e-155	1	mm10---Clcn6
mm10---Ccnt2	2.88479082391594e-159	0.141133	0.696	0.779	7.73123940809472e-155	1	mm10---Ccnt2
mm10---Narf	2.91307983772768e-159	0.123041	0.386	0.448	7.80705396511018e-155	1	mm10---Narf
mm10---Zfp950	3.02697765162698e-159	0.100147	0.637	0.738	8.11230010636032e-155	1	mm10---Zfp950
mm10---Knop1	3.390634830687e-159	0.188038	0.374	0.394	9.08690134624116e-155	1	mm10---Knop1
mm10---Naa16	3.70585812176731e-159	0.106015	0.385	0.454	9.93169976633638e-155	1	mm10---Naa16
mm10---Sec23a	3.79868470155419e-159	0.100327	0.393	0.466	1.01804750001652e-154	1	mm10---Sec23a
mm10---Ssr1	3.93356673841713e-159	0.203095	0.316	0.313	1.05419588589579e-154	1	mm10---Ssr1
mm10---Zfp618	3.94695630693878e-159	0.281312	0.428	0.387	1.05778429025959e-154	1	mm10---Zfp618
mm10---Shoc2	4.37690811961574e-159	0.166667	0.357	0.379	1.17301137605702e-154	1	mm10---Shoc2
mm10---Ypel4	4.6572443573852e-159	0.144426	0.316	0.352	1.24814148777923e-154	1	mm10---Ypel4
mm10---Arrb1	5.04475449591024e-159	0.267356	0.379	0.322	1.35199420490394e-154	1	mm10---Arrb1
mm10---2210016L21Rik	5.47061421922267e-159	0.153462	0.327	0.364	1.46612461075168e-154	1	mm10---2210016L21Rik
mm10---Zdhhc6	5.47594327826633e-159	0.246468	0.396	0.366	1.46755279857538e-154	1	mm10---Zdhhc6
mm10---Prkacb	5.71991308996278e-159	0.209387	0.51	0.531	1.53293670811002e-154	1	mm10---Prkacb
mm10---Zfp800	5.77866281471024e-159	0.15808	0.272	0.287	1.54868163434234e-154	1	mm10---Zfp800
mm10---Tpr	6.16583438911679e-159	0.171935	0.735	0.809	1.6524436162833e-154	1	mm10---Tpr
mm10---Nars	6.38707657973657e-159	0.200155	0.417	0.418	1.7117365233694e-154	1	mm10---Nars
mm10---Slc44a5	6.43260959852553e-159	0.402196	0.361	0.173	1.72393937240484e-154	1	mm10---Slc44a5
mm10---Chpt1	9.10527843148594e-159	0.113256	0.451	0.527	2.44021461963823e-154	1	mm10---Chpt1
mm10---Hs2st1	9.92223767946785e-159	0.174349	0.544	0.595	2.65915969809738e-154	1	mm10---Hs2st1
mm10---Aldoa	1.00683325950928e-158	0.177259	0.371	0.393	2.69831313548488e-154	1	mm10---Aldoa
mm10---Chchd7	1.23523886341846e-158	0.203535	0.31	0.298	3.31044015396147e-154	1	mm10---Chchd7
mm10---Bckdhb	1.28842216901867e-158	0.122413	0.552	0.635	3.45297141297003e-154	1	mm10---Bckdhb
mm10---Ubb	1.48018258501897e-158	0.321275	0.475	0.441	3.96688932785084e-154	1	mm10---Ubb
mm10---Cnot3	1.55314506431287e-158	0.124164	0.306	0.348	4.1624287723585e-154	1	mm10---Cnot3
mm10---Asxl3	2.09187624679801e-158	0.244596	0.411	0.406	5.60622834141866e-154	1	mm10---Asxl3
mm10---A930015D03Rik	2.15784588730271e-158	0.103541	0.422	0.501	5.78302697797126e-154	1	mm10---A930015D03Rik
mm10---Bmpr2	2.30749179396413e-158	0.176277	0.576	0.624	6.18407800782387e-154	1	mm10---Bmpr2
mm10---Fcho1	2.44317948081465e-158	0.116297	0.271	0.315	6.54772100858327e-154	1	mm10---Fcho1
mm10---Zfp536	2.46056413284976e-158	0.537381	0.435	0.236	6.59431187603736e-154	1	mm10---Zfp536
mm10---Rps8	2.50972234983791e-158	0.235595	0.371	0.367	6.7260558975656e-154	1	mm10---Rps8
mm10---Uchl3	2.97379541595861e-158	0.140687	0.344	0.381	7.96977171476908e-154	1	mm10---Uchl3
mm10---Sesn3	3.92792458417697e-158	0.179051	0.43	0.46	1.05268378855943e-153	1	mm10---Sesn3
mm10---Tsn	6.15610133279815e-158	0.186263	0.331	0.35	1.6498351571899e-153	1	mm10---Tsn
mm10---Kiz	6.45420286372248e-158	0.188199	0.365	0.385	1.72972636747762e-153	1	mm10---Kiz
mm10---Mtdh	7.10552513747141e-158	0.15905	0.735	0.813	1.90428073684234e-153	1	mm10---Mtdh
mm10---Tm2d1	7.10979627039629e-158	0.182127	0.323	0.335	1.90542540046621e-153	1	mm10---Tm2d1
mm10---Phf1	7.75952117334284e-158	0.211506	0.399	0.401	2.07955167445588e-153	1	mm10---Phf1
mm10---Arhgap39	8.04547020902173e-158	0.168385	0.615	0.671	2.15618601601782e-153	1	mm10---Arhgap39
mm10---Cxxc4	8.11399604670454e-158	0.184821	0.352	0.36	2.17455094051682e-153	1	mm10---Cxxc4
mm10---Anapc5	9.4725706071188e-158	0.10605	0.586	0.676	2.53864892270784e-153	1	mm10---Anapc5
mm10---Ptpn12	9.58825726162559e-158	0.110669	0.548	0.635	2.56965294611566e-153	1	mm10---Ptpn12
mm10---Megf8	1.10238170104452e-157	0.127717	0.327	0.372	2.95438295879931e-153	1	mm10---Megf8
mm10---Retreg3	1.13544462249179e-157	0.126629	0.374	0.426	3.04299158827799e-153	1	mm10---Retreg3
mm10---Nudcd1	1.21170148728355e-157	0.125624	0.301	0.342	3.2473599859199e-153	1	mm10---Nudcd1
mm10---Mbtps2	1.31815531401946e-157	0.217646	0.378	0.376	3.53265624157215e-153	1	mm10---Mbtps2
mm10---Fbl	1.81165198581229e-157	0.354497	0.366	0.256	4.85522732197695e-153	1	mm10---Fbl
mm10---Swt1	1.97413861629555e-157	0.128736	0.492	0.563	5.29069149167208e-153	1	mm10---Swt1
mm10---Lrrc4	2.29766530303047e-157	0.267247	0.489	0.47	6.15774301212166e-153	1	mm10---Lrrc4
mm10---Gle1	2.30546630071487e-157	0.134974	0.37	0.425	6.17864968591586e-153	1	mm10---Gle1
mm10---A630089N07Rik	2.57254450466626e-157	0.112505	0.396	0.466	6.89441927250558e-153	1	mm10---A630089N07Rik
mm10---Rit2	2.73813631860198e-157	0.244078	0.87	0.912	7.3382053338533e-153	1	mm10---Rit2
mm10---Cep78	2.87012254596791e-157	0.224066	0.388	0.38	7.691928423194e-153	1	mm10---Cep78
mm10---Trim2	2.87621851480314e-157	0.230021	0.826	0.856	7.70826561967241e-153	1	mm10---Trim2
mm10---Timp2	3.08169211353967e-157	0.308895	0.371	0.299	8.25893486428632e-153	1	mm10---Timp2
mm10---Bbs7	3.60487684464023e-157	0.137935	0.331	0.37	9.66106994363581e-153	1	mm10---Bbs7
mm10---Ankrd28	3.91654720661842e-157	0.239631	0.526	0.526	1.04963465137374e-152	1	mm10---Ankrd28
mm10---Slc38a10	4.51996685300362e-157	0.105516	0.226	0.265	1.21135111660497e-152	1	mm10---Slc38a10
mm10---Miat	5.91359943828703e-157	0.20601	0.755	0.812	1.58484464946092e-152	1	mm10---Miat
mm10---Nyap2	6.70425911317482e-157	0.337901	0.647	0.596	1.79674144233085e-152	1	mm10---Nyap2
mm10---Neu1	6.70713409215302e-157	0.169659	0.27	0.276	1.79751193669701e-152	1	mm10---Neu1
mm10---Ensa	7.69810931554144e-157	0.122155	0.299	0.341	2.0630932965651e-152	1	mm10---Ensa
mm10---Gapdh	8.63285408236868e-157	0.203578	0.401	0.422	2.31360489407481e-152	1	mm10---Gapdh
mm10---Nfat5	1.13659143279387e-156	0.25743	0.768	0.783	3.04606503988758e-152	1	mm10---Nfat5
mm10---Caml	1.491987728093e-156	0.165403	0.366	0.398	3.99852711128923e-152	1	mm10---Caml
mm10---Capn2	1.7301727608562e-156	0.12763	0.373	0.422	4.6368629990946e-152	1	mm10---Capn2
mm10---Sgsm3	1.9474999259747e-156	0.112954	0.402	0.468	5.21929980161219e-152	1	mm10---Sgsm3
mm10---Hsp90ab1	2.18939171246347e-156	0.162836	0.597	0.673	5.8675697894021e-152	1	mm10---Hsp90ab1
mm10---Slx4ip	2.64893857073109e-156	0.110429	0.34	0.402	7.09915536955932e-152	1	mm10---Slx4ip
mm10---Med6	2.67838910912868e-156	0.145118	0.314	0.346	7.17808281246485e-152	1	mm10---Med6
mm10---E230029C05Rik	3.08350776907374e-156	0.302315	0.373	0.32	8.26380082111761e-152	1	mm10---E230029C05Rik
mm10---Atp6v1d	3.68376295803129e-156	0.105979	0.323	0.381	9.87248472752385e-152	1	mm10---Atp6v1d
mm10---Sgce	3.77514122214807e-156	0.113667	0.419	0.487	1.01173784753568e-151	1	mm10---Sgce
mm10---Arhgap26	4.60496474237502e-156	0.306546	0.713	0.688	1.23413055095651e-151	1	mm10---Arhgap26
mm10---Gm45847	4.65952432301019e-156	0.192833	0.386	0.402	1.24875251856673e-151	1	mm10---Gm45847
mm10---Rnft1	6.5025803755369e-156	0.184302	0.398	0.415	1.74269154064389e-151	1	mm10---Rnft1
mm10---Tango2	6.56383746578286e-156	0.172419	0.718	0.786	1.75910844082981e-151	1	mm10---Tango2
mm10---Sesn1	7.52953887079641e-156	0.116335	0.578	0.665	2.01791641737344e-151	1	mm10---Sesn1
mm10---Tmem196	7.73470928925099e-156	0.405238	0.363	0.215	2.07290208951927e-151	1	mm10---Tmem196
mm10---Tbc1d12	7.81384012227686e-156	0.139359	0.485	0.554	2.0941091527702e-151	1	mm10---Tbc1d12
mm10---Alkbh1	8.65858601541514e-156	0.10909	0.311	0.368	2.32050105213126e-151	1	mm10---Alkbh1
mm10---Echdc1	9.39766488411899e-156	0.226189	0.339	0.316	2.51857418894389e-151	1	mm10---Echdc1
mm10---Tmed4	1.39010192399702e-155	0.258061	0.316	0.269	3.72547315631201e-151	1	mm10---Tmed4
mm10---Ago1	1.41604769244787e-155	0.124276	0.32	0.359	3.79500781576028e-151	1	mm10---Ago1
mm10---Stk3	1.45673427062828e-155	0.222692	0.513	0.526	3.9040478452838e-151	1	mm10---Stk3
mm10---Coq5	1.57026267261606e-155	0.152246	0.327	0.357	4.20830396261104e-151	1	mm10---Coq5
mm10---Macrod1	2.43177370511828e-155	0.168298	0.433	0.484	6.51715352971698e-151	1	mm10---Macrod1
mm10---Gap43	2.51317154220229e-155	0.285634	0.73	0.738	6.73529973310214e-151	1	mm10---Gap43
mm10---Rwdd1	2.88214857516194e-155	0.112552	0.271	0.316	7.724158181434e-151	1	mm10---Rwdd1
mm10---Klhdc1	4.15582096480267e-155	0.158539	0.343	0.377	1.11376001856712e-150	1	mm10---Klhdc1
mm10---Tmbim4	4.73490947207887e-155	0.20996	0.33	0.325	1.26895573851714e-150	1	mm10---Tmbim4
mm10---Cox11	5.00001607054904e-155	0.114408	0.294	0.347	1.34000430690714e-150	1	mm10---Cox11
mm10---Uvssa	6.09965785125365e-155	0.243308	0.322	0.286	1.63470830413598e-150	1	mm10---Uvssa
mm10---Rasa2	6.92039445467667e-155	0.118038	0.453	0.522	1.85466571385335e-150	1	mm10---Rasa2
mm10---Fam45a	7.82791115518453e-155	0.157363	0.353	0.383	2.09788018958945e-150	1	mm10---Fam45a
mm10---Gnptab	1.01718466734884e-154	0.109218	0.356	0.415	2.72605490849488e-150	1	mm10---Gnptab
mm10---Gfod2	1.08826722696631e-154	0.1002	0.405	0.483	2.91655616826972e-150	1	mm10---Gfod2
mm10---Rfx7	1.2040000460625e-154	0.165297	0.773	0.845	3.22672012344751e-150	1	mm10---Rfx7
mm10---Mest	1.30864454521222e-154	0.303503	0.325	0.228	3.50716738116875e-150	1	mm10---Mest
mm10---Pid1	1.35056380363532e-154	0.353363	0.713	0.685	3.61951099374266e-150	1	mm10---Pid1
mm10---Chgb	1.47486261875785e-154	0.26401	0.525	0.535	3.95263181827104e-150	1	mm10---Chgb
mm10---Dzip3	1.60841190881419e-154	0.138898	0.691	0.772	4.31054391562203e-150	1	mm10---Dzip3
mm10---Elovl6	1.7168600604156e-154	0.166327	0.567	0.624	4.60118496191381e-150	1	mm10---Elovl6
mm10---Eef1a1	1.78380121116931e-154	0.167235	0.37	0.406	4.78058724593376e-150	1	mm10---Eef1a1
mm10---Chchd6	2.0418743598665e-154	0.100039	0.514	0.601	5.47222328444221e-150	1	mm10---Chchd6
mm10---Plppr3	2.14276129990768e-154	0.193695	0.352	0.362	5.74260028375257e-150	1	mm10---Plppr3
mm10---Mcts1	2.54491722430079e-154	0.142545	0.321	0.353	6.82037816112612e-150	1	mm10---Mcts1
mm10---Gm48091	2.77609348202679e-154	0.340982	0.484	0.422	7.43993053183181e-150	1	mm10---Gm48091
mm10---Ccpg1	2.99917891308524e-154	0.154787	0.393	0.429	8.03779948706843e-150	1	mm10---Ccpg1
mm10---Pik3c2a	4.03039948998503e-154	0.135058	0.574	0.647	1.08014706331599e-149	1	mm10---Pik3c2a
mm10---Usp49	5.34224779438419e-154	0.118865	0.323	0.369	1.43172240889496e-149	1	mm10---Usp49
mm10---Zmym4	5.66151119770224e-154	0.199322	0.83	0.883	1.5172850009842e-149	1	mm10---Zmym4
mm10---Tmem29	5.96529065976406e-154	0.15752	0.354	0.384	1.59869789681677e-149	1	mm10---Tmem29
mm10---Dpf2	6.07976490920203e-154	0.132651	0.296	0.326	1.62937699566614e-149	1	mm10---Dpf2
mm10---Gprin3	6.25773570524996e-154	0.38305	0.414	0.245	1.67707316900699e-149	1	mm10---Gprin3
mm10---Slc44a2	1.04358334988137e-153	0.148891	0.407	0.456	2.79680337768207e-149	1	mm10---Slc44a2
mm10---Wrn	1.0646421216026e-153	0.12024	0.399	0.458	2.85324088589497e-149	1	mm10---Wrn
mm10---Cep295	1.15529788955214e-153	0.101071	0.399	0.469	3.09619834399973e-149	1	mm10---Cep295
mm10---Sfmbt1	1.36137306618345e-153	0.163534	0.503	0.558	3.64847981737163e-149	1	mm10---Sfmbt1
mm10---Slc17a5	1.54533098156512e-153	0.100318	0.389	0.463	4.14148703059452e-149	1	mm10---Slc17a5
mm10---Mrps18a	2.014002170612e-153	0.213848	0.337	0.322	5.39752581724016e-149	1	mm10---Mrps18a
mm10---Naxd	2.02653493979784e-153	0.149882	0.342	0.375	5.43111363865822e-149	1	mm10---Naxd
mm10---Lrrc29	2.25007957630994e-153	0.151034	0.391	0.427	6.03021326451063e-149	1	mm10---Lrrc29
mm10---Daglb	2.44223411636642e-153	0.124556	0.295	0.336	6.54518743186201e-149	1	mm10---Daglb
mm10---Ggact	2.45576450406123e-153	0.236209	0.502	0.525	6.58144887088409e-149	1	mm10---Ggact
mm10---Fam92a	2.62466413200858e-153	0.11854	0.317	0.363	7.034099873783e-149	1	mm10---Fam92a
mm10---Yipf5	2.80995582460366e-153	0.111961	0.332	0.387	7.53068160993781e-149	1	mm10---Yipf5
mm10---Cox5a	2.81289687131396e-153	0.159969	0.361	0.396	7.53856361512141e-149	1	mm10---Cox5a
mm10---Gm26724	2.91117500561536e-153	0.257133	0.433	0.416	7.80194901504917e-149	1	mm10---Gm26724
mm10---Scarb2	3.26198208836768e-153	0.166565	0.332	0.351	8.74211199682538e-149	1	mm10---Scarb2
mm10---Gm15738	3.52155804421805e-153	0.254349	0.57	0.572	9.43777555850437e-149	1	mm10---Gm15738
mm10---Arhgap20	3.65209654885836e-153	0.258972	0.431	0.4	9.7876187509404e-149	1	mm10---Arhgap20
mm10---Phf6	4.76078638693436e-153	0.223548	0.465	0.463	1.27589075169841e-148	1	mm10---Phf6
mm10---Cdc14b	5.09398482951791e-153	0.204747	0.539	0.569	1.3651879343108e-148	1	mm10---Cdc14b
mm10---Xrn1	5.85212426248854e-153	0.172336	0.737	0.803	1.56836930234693e-148	1	mm10---Xrn1
mm10---Aagab	5.89432063784541e-153	0.109571	0.357	0.408	1.57967793094257e-148	1	mm10---Aagab
mm10---Itfg2	7.4512492683677e-153	0.20226	0.345	0.343	1.99693480392254e-148	1	mm10---Itfg2
mm10---Col16a1	7.61724768695224e-153	0.414393	0.364	0.225	2.0414223801032e-148	1	mm10---Col16a1
mm10---Ssr4	8.15929592514101e-153	0.170716	0.341	0.367	2.18669130793779e-148	1	mm10---Ssr4
mm10---Map2k4	8.68021037905813e-153	0.19497	0.799	0.85	2.32629638158758e-148	1	mm10---Map2k4
mm10---Pigt	8.86413190772173e-153	0.23387	0.298	0.268	2.37558735126942e-148	1	mm10---Pigt
mm10---Gnptg	9.22769970110565e-153	0.11117	0.341	0.393	2.47302351989631e-148	1	mm10---Gnptg
mm10---Uba6	9.60661814884648e-153	0.104732	0.402	0.474	2.57457366389086e-148	1	mm10---Uba6
mm10---Cnot6l	1.18771102238809e-152	0.11932	0.405	0.466	3.18306554000009e-148	1	mm10---Cnot6l
mm10---Rnf24	1.94898012999059e-152	0.114562	0.427	0.497	5.22326674837478e-148	1	mm10---Rnf24
mm10---Atraid	2.02558292055215e-152	0.149141	0.327	0.365	5.42856222707975e-148	1	mm10---Atraid
mm10---Insig2	2.37305125989963e-152	0.104585	0.317	0.372	6.359777376531e-148	1	mm10---Insig2
mm10---Gm20713	2.50258119851708e-152	0.522135	0.266	0.124	6.70691761202577e-148	1	mm10---Gm20713
mm10---Dnaja3	2.94740431031843e-152	0.116518	0.332	0.381	7.89904355165338e-148	1	mm10---Dnaja3
mm10---BC005624	3.40755345486769e-152	0.164107	0.288	0.298	9.13224325904541e-148	1	mm10---BC005624
mm10---Cdh10	4.42355084177284e-152	0.412958	0.765	0.747	1.18551162559512e-147	1	mm10---Cdh10
mm10---Tet1	5.98827954255763e-152	0.270637	0.362	0.326	1.60485891740545e-147	1	mm10---Tet1
mm10---Rint1	7.23354445679312e-152	0.102642	0.302	0.356	1.93858991442056e-147	1	mm10---Rint1
mm10---Avl9	7.94194437429265e-152	0.142444	0.399	0.447	2.12844109231043e-147	1	mm10---Avl9
mm10---Cep162	8.587872205369e-152	0.107646	0.322	0.381	2.30154975103889e-147	1	mm10---Cep162
mm10---Tmtc1	1.02207069082189e-151	0.160131	0.581	0.655	2.73914945140265e-147	1	mm10---Tmtc1
mm10---Lsm7	1.1231751826612e-151	0.19719	0.321	0.314	3.01010948953201e-147	1	mm10---Lsm7
mm10---3110056K07Rik	1.28729590499109e-151	0.210069	0.34	0.323	3.44995302537613e-147	1	mm10---3110056K07Rik
mm10---Gm28375	1.47702803227526e-151	0.283584	0.415	0.381	3.95843512649771e-147	1	mm10---Gm28375
mm10---Igsf3	1.96541990659881e-151	0.329546	0.293	0.148	5.2673253496848e-147	1	mm10---Igsf3
mm10---Mettl2	2.12370998992976e-151	0.13196	0.294	0.327	5.69154277301175e-147	1	mm10---Mettl2
mm10---BC031181	2.20291216428396e-151	0.213034	0.384	0.383	5.90380460028102e-147	1	mm10---BC031181
mm10---Garnl3	2.33268488565292e-151	0.27893	0.815	0.812	6.25159549354982e-147	1	mm10---Garnl3
mm10---Hps4	2.80629130841289e-151	0.195658	0.342	0.341	7.52086070654655e-147	1	mm10---Hps4
mm10---Setd4	2.91879614332942e-151	0.194183	0.335	0.331	7.82237366412283e-147	1	mm10---Setd4
mm10---Thap3	3.82459138652613e-151	0.128454	0.393	0.46	1.024990491589e-146	1	mm10---Thap3
mm10---Ddb2	3.93382187239784e-151	0.130304	0.42	0.48	1.05426426180262e-146	1	mm10---Ddb2
mm10---Zkscan1	4.19397488710012e-151	0.136643	0.31	0.337	1.12398526974283e-146	1	mm10---Zkscan1
mm10---Tubb3	4.96236517597235e-151	0.143991	0.554	0.626	1.32991386716059e-146	1	mm10---Tubb3
mm10---Mrpl4	5.68335704227364e-151	0.126426	0.271	0.306	1.52313968732934e-146	1	mm10---Mrpl4
mm10---Ptpn9	6.53983167577258e-151	0.144837	0.614	0.694	1.75267488910705e-146	1	mm10---Ptpn9
mm10---Ing4	8.01750048477021e-151	0.152891	0.354	0.385	2.14869012991842e-146	1	mm10---Ing4
mm10---Tsg101	9.24854451983558e-151	0.114797	0.327	0.379	2.47860993131594e-146	1	mm10---Tsg101
mm10---Hsd17b12	9.75607455711426e-151	0.130152	0.385	0.44	2.61462798130662e-146	1	mm10---Hsd17b12
mm10---Xrcc6	1.0099734626855e-150	0.195446	0.53	0.556	2.70672887999715e-146	1	mm10---Xrcc6
mm10---2610316D01Rik	1.34187581889305e-150	0.341894	0.412	0.352	3.59622719463338e-146	1	mm10---2610316D01Rik
mm10---Prpf19	1.83463686090601e-150	0.172324	0.282	0.283	4.91682678722811e-146	1	mm10---Prpf19
mm10---Usp46	2.00264239972394e-150	0.178976	0.414	0.442	5.36708163126016e-146	1	mm10---Usp46
mm10---Lingo2	2.24058991736416e-150	0.362656	0.979	0.976	6.00478097853596e-146	1	mm10---Lingo2
mm10---Stub1	2.55429927993659e-150	0.183163	0.321	0.324	6.84552207023006e-146	1	mm10---Stub1
mm10---B3galnt2	2.75877952066657e-150	0.113426	0.312	0.358	7.39352911538641e-146	1	mm10---B3galnt2
mm10---Dcaf17	2.84278311856099e-150	0.154711	0.381	0.416	7.61865875774346e-146	1	mm10---Dcaf17
mm10---Trmt61b	2.88944900611818e-150	0.203738	0.312	0.31	7.74372333639671e-146	1	mm10---Trmt61b
mm10---Ehmt1	3.04061767678893e-150	0.132292	0.749	0.831	8.14885537379434e-146	1	mm10---Ehmt1
mm10---Dzank1	3.13767194786902e-150	0.171026	0.695	0.756	8.40896082028898e-146	1	mm10---Dzank1
mm10---Kcna1	4.07452681167382e-150	0.137922	0.469	0.548	1.09197318552858e-145	1	mm10---Kcna1
mm10---Trub2	4.8819585879415e-150	0.146665	0.321	0.35	1.30836490156832e-145	1	mm10---Trub2
mm10---Eif2b4	5.16215306758765e-150	0.132946	0.315	0.356	1.38345702211349e-145	1	mm10---Eif2b4
mm10---Fam234b	5.30130378765519e-150	0.115676	0.285	0.325	1.42074941509159e-145	1	mm10---Fam234b
mm10---Acvr2a	6.25091433620186e-150	0.159881	0.405	0.438	1.6752450421021e-145	1	mm10---Acvr2a
mm10---Fbxo41	8.11092026051343e-150	0.117958	0.394	0.454	2.1737266298176e-145	1	mm10---Fbxo41
mm10---2700054A10Rik	9.89318898161941e-150	0.379147	0.325	0.163	2.651374647074e-145	1	mm10---2700054A10Rik
mm10---Fam160a2	1.07258093474644e-149	0.107338	0.309	0.362	2.87451690512047e-145	1	mm10---Fam160a2
mm10---Arhgef1	1.22554674914792e-149	0.181737	0.356	0.358	3.28446528771642e-145	1	mm10---Arhgef1
mm10---Soga3	1.29871303663624e-149	0.102598	0.744	0.842	3.48055093818513e-145	1	mm10---Soga3
mm10---Wwp2	1.47241073391868e-149	0.112565	0.369	0.428	3.94606076690205e-145	1	mm10---Wwp2
mm10---Rab27a	1.7835052533624e-149	0.220748	0.316	0.29	4.77979407901124e-145	1	mm10---Rab27a
mm10---Luzp1	3.16432067701377e-149	0.237596	0.691	0.719	8.48037941439691e-145	1	mm10---Luzp1
mm10---Lekr1	3.24546653150122e-149	0.163639	0.511	0.564	8.69785030442326e-145	1	mm10---Lekr1
mm10---Mto1	3.39747234165615e-149	0.12746	0.276	0.313	9.10522587563847e-145	1	mm10---Mto1
mm10---Hnrnpa2b1	4.04588298588016e-149	0.192393	0.789	0.844	1.08429664021588e-144	1	mm10---Hnrnpa2b1
mm10---Sh3bp5	5.03811601971805e-149	0.303792	0.346	0.244	1.35021509328444e-144	1	mm10---Sh3bp5
mm10---Rab10os	7.44585539382845e-149	0.110165	0.316	0.371	1.99548924554603e-144	1	mm10---Rab10os
mm10---Cstf3	1.05345787769035e-148	0.115415	0.66	0.755	2.82326711221014e-144	1	mm10---Cstf3
mm10---Dcakd	1.07146014409177e-148	0.215398	0.384	0.378	2.87151318616594e-144	1	mm10---Dcakd
mm10---Cntln	1.1850838261886e-148	0.128147	0.486	0.553	3.17602465418544e-144	1	mm10---Cntln
mm10---Nelfb	1.26237823829137e-148	0.148007	0.337	0.362	3.38317367862088e-144	1	mm10---Nelfb
mm10---Pnkp	1.68456444488344e-148	0.101423	0.277	0.331	4.51463271228761e-144	1	mm10---Pnkp
mm10---Fam20b	1.68585938240292e-148	0.110854	0.296	0.347	4.51810314483982e-144	1	mm10---Fam20b
mm10---Rsf1os1	1.69729270919998e-148	0.295782	0.345	0.272	4.54874446065594e-144	1	mm10---Rsf1os1
mm10---Ralgapa2	1.89037162141305e-148	0.203205	0.795	0.844	5.06619594538697e-144	1	mm10---Ralgapa2
mm10---Rpl27a	1.97670486308283e-148	0.23526	0.357	0.327	5.29756903306199e-144	1	mm10---Rpl27a
mm10---Gm15952	2.3350195582234e-148	0.222359	0.356	0.34	6.2578524160387e-144	1	mm10---Gm15952
mm10---Pdzd4	2.93985344622959e-148	0.132491	0.665	0.746	7.8788072358953e-144	1	mm10---Pdzd4
mm10---Zfyve16	3.13325583898411e-148	0.236086	0.36	0.324	8.39712564847741e-144	1	mm10---Zfyve16
mm10---Nxpe3	3.48651829343317e-148	0.159446	0.354	0.383	9.34386902640089e-144	1	mm10---Nxpe3
mm10---Gm16083	3.63674396400998e-148	0.402109	0.466	0.325	9.74647382354675e-144	1	mm10---Gm16083
mm10---Xylt1	3.70207957448061e-148	0.429431	0.5	0.367	9.92157325960803e-144	1	mm10---Xylt1
mm10---4930473A02Rik	3.79085205664053e-148	0.241166	0.365	0.344	1.01594835117966e-143	1	mm10---4930473A02Rik
mm10---Cab39l	3.97011381866906e-148	0.199175	0.484	0.503	1.06399050340331e-143	1	mm10---Cab39l
mm10---Entpd6	4.39365778648262e-148	0.182617	0.316	0.312	1.17750028677734e-143	1	mm10---Entpd6
mm10---Arhgap24	5.72937583968383e-148	0.469198	0.595	0.491	1.53547272503527e-143	1	mm10---Arhgap24
mm10---Jph4	6.55440280728072e-148	0.127953	0.366	0.417	1.75657995235123e-143	1	mm10---Jph4
mm10---Add2	9.56665505177296e-148	0.152783	0.694	0.764	2.56386355387515e-143	1	mm10---Add2
mm10---Abcc1	1.02963462203608e-147	0.133547	0.303	0.337	2.7594207870567e-143	1	mm10---Abcc1
mm10---Mat2a	1.23189793230988e-147	0.155465	0.654	0.722	3.30148645859047e-143	1	mm10---Mat2a
mm10---Srebf2	1.77107685263346e-147	0.136157	0.509	0.583	4.74648596505767e-143	1	mm10---Srebf2
mm10---Atat1	1.79112490567392e-147	0.13918	0.319	0.355	4.8002147472061e-143	1	mm10---Atat1
mm10---Podxl2	1.7925005854061e-147	0.270967	0.32	0.253	4.80390156888834e-143	1	mm10---Podxl2
mm10---Gm1604a	1.92904294341472e-147	0.148049	0.407	0.45	5.16983508835146e-143	1	mm10---Gm1604a
mm10---Bbs9	3.41748917082705e-147	0.253762	0.526	0.524	9.1588709778165e-143	1	mm10---Bbs9
mm10---Gm30054	4.02657584610203e-147	0.250481	0.34	0.303	1.07912232675534e-142	1	mm10---Gm30054
mm10---Fam214a	4.07826867699061e-147	0.125177	0.43	0.492	1.09297600543348e-142	1	mm10---Fam214a
mm10---Eef2k	4.59930503734387e-147	0.290362	0.357	0.275	1.23261375000816e-142	1	mm10---Eef2k
mm10---Abhd18	5.49150311651679e-147	0.12985	0.718	0.806	1.4717228352265e-142	1	mm10---Abhd18
mm10---Nrip2	7.09284093292491e-147	0.117677	0.246	0.275	1.90088137002388e-142	1	mm10---Nrip2
mm10---Dad1	7.84932587652743e-147	0.281328	0.315	0.261	2.10361933490935e-142	1	mm10---Dad1
mm10---Ntng2	8.18238192413902e-147	0.451165	0.269	0.129	2.19287835566926e-142	1	mm10---Ntng2
mm10---Brip1os	8.8867625725043e-147	0.265109	0.421	0.379	2.38165236943115e-142	1	mm10---Brip1os
mm10---Snhg20	9.89187314796349e-147	0.221298	0.346	0.329	2.65102200365422e-142	1	mm10---Snhg20
mm10---Klhl15	1.05977606584785e-146	0.115932	0.297	0.343	2.84019985647224e-142	1	mm10---Klhl15
mm10---Adcy3	1.06400359683138e-146	0.146419	0.366	0.404	2.85152963950809e-142	1	mm10---Adcy3
mm10---Mdh2	1.12805861480739e-146	0.123292	0.309	0.35	3.02319708768381e-142	1	mm10---Mdh2
mm10---Dcun1d3	1.90513117139855e-146	0.110384	0.278	0.32	5.10575153934811e-142	1	mm10---Dcun1d3
mm10---Cd200	2.29904337874484e-146	0.278977	0.337	0.272	6.16143625503617e-142	1	mm10---Cd200
mm10---Tia1	2.52331851510155e-146	0.153146	0.778	0.85	6.76249362047214e-142	1	mm10---Tia1
mm10---Aktip	2.56297232696107e-146	0.168478	0.333	0.343	6.86876583625567e-142	1	mm10---Aktip
mm10---Agrp	2.64325570509699e-146	0.256576	0.324	0.278	7.08392528965992e-142	1	mm10---Agrp
mm10---Slc25a14	2.8778865233306e-146	0.182999	0.257	0.248	7.712735882526e-142	1	mm10---Slc25a14
mm10---Oscp1	3.31279202170121e-146	0.116267	0.306	0.354	8.87828261815923e-142	1	mm10---Oscp1
mm10---Lyn	3.64712203184476e-146	0.308973	0.306	0.23	9.77428704534396e-142	1	mm10---Lyn
mm10---Wdr36	3.67891362782913e-146	0.105066	0.267	0.311	9.85948852258206e-142	1	mm10---Wdr36
mm10---Sgta	4.73473381271911e-146	0.100596	0.322	0.377	1.26890866180872e-141	1	mm10---Sgta
mm10---Zfp1	5.73517123144613e-146	0.141692	0.372	0.41	1.53702589002756e-141	1	mm10---Zfp1
mm10---Cntnap2	7.02110573378476e-146	0.367533	0.998	0.996	1.88165633665432e-141	1	mm10---Cntnap2
mm10---Ddx23	7.20614815043155e-146	0.185598	0.286	0.273	1.93124770431566e-141	1	mm10---Ddx23
mm10---Mok	8.13667625821519e-146	0.304612	0.354	0.28	2.18062923720167e-141	1	mm10---Mok
mm10---Bbip1	8.35885483829344e-146	0.164643	0.396	0.426	2.24017309666264e-141	1	mm10---Bbip1
mm10---Ptges3	1.21808713318987e-145	0.107662	0.292	0.337	3.26447351694885e-141	1	mm10---Ptges3
mm10---Taf6	1.22317693883764e-145	0.144752	0.317	0.346	3.27811419608486e-141	1	mm10---Taf6
mm10---Gm43376	1.38530561639662e-145	0.267797	0.4	0.368	3.71261905194294e-141	1	mm10---Gm43376
mm10---Cers4	1.41163815943014e-145	0.161327	0.609	0.666	3.78319026727277e-141	1	mm10---Cers4
mm10---Celsr2	1.6980748743587e-145	0.120402	0.27	0.308	4.55084066328132e-141	1	mm10---Celsr2
mm10---Irs1	1.90162852711607e-145	0.172388	0.314	0.322	5.09636445267107e-141	1	mm10---Irs1
mm10---Plpp1	1.94671587089532e-145	0.198286	0.294	0.273	5.21719853399947e-141	1	mm10---Plpp1
mm10---Atg4d	3.02056232471144e-145	0.148874	0.32	0.341	8.09510703022666e-141	1	mm10---Atg4d
mm10---Sntg1	3.73548521475411e-145	0.326908	0.973	0.985	1.0011100375541e-140	1	mm10---Sntg1
mm10---Castor2	4.08799322866867e-145	0.171253	0.404	0.432	1.0955821852832e-140	1	mm10---Castor2
mm10---Pantr1	4.83864523683285e-145	0.332418	0.274	0.148	1.2967569234712e-140	1	mm10---Pantr1
mm10---Qtrt1	5.23118011123868e-145	0.133373	0.311	0.35	1.40195626981197e-140	1	mm10---Qtrt1
mm10---Zfp426	5.65054125376329e-145	0.173278	0.266	0.262	1.51434505600856e-140	1	mm10---Zfp426
mm10---Bicd1	6.37071691932335e-145	0.210396	0.885	0.926	1.70735213437866e-140	1	mm10---Bicd1
mm10---Ctsl	7.20758371313361e-145	0.274372	0.398	0.36	1.93163243511981e-140	1	mm10---Ctsl
mm10---Sdc2	1.01274028472378e-144	0.388521	0.376	0.246	2.71414396305973e-140	1	mm10---Sdc2
mm10---Ica1l	1.02210996809016e-144	0.114364	0.316	0.366	2.73925471448164e-140	1	mm10---Ica1l
mm10---Sorcs1	1.04176039724128e-144	0.241102	0.529	0.656	2.79191786460662e-140	1	mm10---Sorcs1
mm10---Npm1	1.1530590237606e-144	0.100637	0.274	0.324	3.09019818367841e-140	1	mm10---Npm1
mm10---Stt3a	1.22196583147843e-144	0.101336	0.249	0.29	3.27486842836218e-140	1	mm10---Stt3a
mm10---Lims1	1.57311374232251e-144	0.113402	0.492	0.572	4.21594482942432e-140	1	mm10---Lims1
mm10---Hook2	2.40082844994273e-144	0.134539	0.38	0.433	6.43422024584652e-140	1	mm10---Hook2
mm10---Tmem167	3.46301748204949e-144	0.11167	0.38	0.438	9.28088685189263e-140	1	mm10---Tmem167
mm10---Atxn7l3b	3.61176294823206e-144	0.282105	0.323	0.26	9.67952470126193e-140	1	mm10---Atxn7l3b
mm10---Wdr34	3.70709909233864e-144	0.179513	0.266	0.259	9.93502556746756e-140	1	mm10---Wdr34
mm10---Sin3a	4.38665328759643e-144	0.144298	0.294	0.327	1.17562308107584e-139	1	mm10---Sin3a
mm10---Gm48512	4.67366283655752e-144	0.19583	0.542	0.579	1.25254164019741e-139	1	mm10---Gm48512
mm10---Hspa8	4.81536577835473e-144	0.236241	0.524	0.551	1.29051802859907e-139	1	mm10---Hspa8
mm10---Ranbp17	6.44738626419389e-144	0.107954	0.546	0.627	1.72789951880396e-139	1	mm10---Ranbp17
mm10---Bzw2	6.5429783873295e-144	0.175208	0.486	0.518	1.75351820780431e-139	1	mm10---Bzw2
mm10---Ift122	6.60584227068449e-144	0.203218	0.332	0.329	1.77036572854344e-139	1	mm10---Ift122
mm10---Usp11	6.87542791967908e-144	0.283507	0.353	0.283	1.84261468247399e-139	1	mm10---Usp11
mm10---Bcl9	7.71778204552827e-144	0.317601	0.383	0.297	2.06836558820158e-139	1	mm10---Bcl9
mm10---Aimp1	8.19206686181672e-144	0.118881	0.276	0.315	2.19547391896688e-139	1	mm10---Aimp1
mm10---Fbxl12	8.29480915838473e-144	0.124388	0.267	0.294	2.22300885444711e-139	1	mm10---Fbxl12
mm10---Ptprr	1.22813749420417e-143	0.266103	0.693	0.692	3.29140848446719e-139	1	mm10---Ptprr
mm10---AI480526	1.43100313777534e-143	0.137468	0.334	0.37	3.83508840923791e-139	1	mm10---AI480526
mm10---Begain	1.43715712129562e-143	0.144624	0.257	0.27	3.85158108507226e-139	1	mm10---Begain
mm10---Meaf6	1.51408085653566e-143	0.138279	0.355	0.395	4.05773669551558e-139	1	mm10---Meaf6
mm10---Tex10	1.58193411252696e-143	0.13738	0.269	0.287	4.23958342157226e-139	1	mm10---Tex10
mm10---Zfp846	2.0688204882787e-143	0.179313	0.347	0.362	5.54443890858692e-139	1	mm10---Zfp846
mm10---Slit1	2.61758444025955e-143	0.401012	0.336	0.177	7.01512629989559e-139	1	mm10---Slit1
mm10---Dixdc1	3.43626827079537e-143	0.159689	0.612	0.675	9.20919896573158e-139	1	mm10---Dixdc1
mm10---Stard3nl	3.64240278936383e-143	0.178209	0.308	0.303	9.76163947549508e-139	1	mm10---Stard3nl
mm10---Tigd2	4.15769812761953e-143	0.231002	0.346	0.319	1.11426309820203e-138	1	mm10---Tigd2
mm10---Gm16552	5.4972827120572e-143	0.210363	0.33	0.309	1.47327176683133e-138	1	mm10---Gm16552
mm10---Arhgap5	6.91532150742597e-143	0.105805	0.597	0.687	1.85330616399016e-138	1	mm10---Arhgap5
mm10---Cabp1	9.94833037881402e-143	0.306203	0.366	0.274	2.66615254152216e-138	1	mm10---Cabp1
mm10---Elovl4	1.17191514172267e-142	0.196017	0.292	0.273	3.14073257981677e-138	1	mm10---Elovl4
mm10---Fntb	1.26292030650977e-142	0.122319	0.396	0.45	3.38462642144619e-138	1	mm10---Fntb
mm10---Zfp169	1.45676880882249e-142	0.106981	0.306	0.354	3.90414040764426e-138	1	mm10---Zfp169
mm10---Zfp2	1.78094443583973e-142	0.154355	0.288	0.295	4.77293108805049e-138	1	mm10---Zfp2
mm10---4930455C13Rik	1.87308976419851e-142	0.238561	0.296	0.26	5.01988056805201e-138	1	mm10---4930455C13Rik
mm10---Cnot9	2.83058786824058e-142	0.120943	0.259	0.283	7.58597548688476e-138	1	mm10---Cnot9
mm10---Zgpat	3.2585794811848e-142	0.154985	0.297	0.307	8.73299300957526e-138	1	mm10---Zgpat
mm10---Dipk1b	4.99974535430185e-142	0.161863	0.252	0.256	1.3399317549529e-137	1	mm10---Dipk1b
mm10---Tkt	5.75352997497688e-142	0.136705	0.28	0.307	1.5419460332938e-137	1	mm10---Tkt
mm10---Pex3	5.78985663222015e-142	0.142042	0.27	0.282	1.551681577435e-137	1	mm10---Pex3
mm10---Zfp141	5.85178960060787e-142	0.207483	0.297	0.278	1.56827961296291e-137	1	mm10---Zfp141
mm10---Bcr	6.4727697247346e-142	0.113785	0.395	0.451	1.73470228622887e-137	1	mm10---Bcr
mm10---Bace1	8.46485033672173e-142	0.109784	0.269	0.306	2.26857989024142e-137	1	mm10---Bace1
mm10---Ift81	9.266583062679e-142	0.188987	0.513	0.534	2.48344426079797e-137	1	mm10---Ift81
mm10---Sigmar1	1.01099903657366e-141	0.268165	0.284	0.201	2.7094774180174e-137	1	mm10---Sigmar1
mm10---Mllt11	1.01850190230969e-141	0.11559	0.334	0.384	2.72958509818997e-137	1	mm10---Mllt11
mm10---Hmox2	1.04209613307001e-141	0.156949	0.349	0.362	2.79281763662762e-137	1	mm10---Hmox2
mm10---Fam171a1	1.05901810816135e-141	0.130299	0.394	0.441	2.83816852987241e-137	1	mm10---Fam171a1
mm10---Snw1	1.13131586664525e-141	0.2121	0.34	0.333	3.03192652260926e-137	1	mm10---Snw1
mm10---Hacd1	1.70092163964824e-141	0.122389	0.411	0.472	4.55846999425728e-137	1	mm10---Hacd1
mm10---Crbn	1.70234065553996e-141	0.106634	0.242	0.277	4.56227295684709e-137	1	mm10---Crbn
mm10---Hars	2.07366978105273e-141	0.107482	0.255	0.297	5.55743501322132e-137	1	mm10---Hars
mm10---Slbp	3.02468156030128e-141	0.210387	0.282	0.252	8.10614658160742e-137	1	mm10---Slbp
mm10---Fam57b	3.09208179661034e-141	0.132289	0.291	0.324	8.2867792149157e-137	1	mm10---Fam57b
mm10---Bmper	3.16906954771437e-141	0.33378	0.258	0.107	8.49310638787451e-137	1	mm10---Bmper
mm10---Cirbp	3.31499751985699e-141	0.156268	0.324	0.342	8.88419335321673e-137	1	mm10---Cirbp
mm10---Gm13052	4.00755719597377e-141	0.20887	0.377	0.362	1.07402532852097e-136	1	mm10---Gm13052
mm10---Pabpc4	4.38133795526488e-141	0.18447	0.281	0.265	1.17419857201099e-136	1	mm10---Pabpc4
mm10---Slc25a27	8.66040419328563e-141	0.135769	0.7	0.774	2.32098832380055e-136	1	mm10---Slc25a27
mm10---Ring1	1.05298247214672e-140	0.139877	0.317	0.35	2.8219930253532e-136	1	mm10---Ring1
mm10---Mycbp	1.17508071943715e-140	0.212375	0.389	0.382	3.14921632809155e-136	1	mm10---Mycbp
mm10---6530409C15Rik	1.44762361921161e-140	0.256771	0.339	0.288	3.87963129948711e-136	1	mm10---6530409C15Rik
mm10---Tomm20	1.47513507786699e-140	0.175402	0.285	0.291	3.95336200868353e-136	1	mm10---Tomm20
mm10---Tpd52l2	1.72667833087543e-140	0.123657	0.284	0.312	4.62749792674616e-136	1	mm10---Tpd52l2
mm10---Ank1	1.74069402489937e-140	0.149562	0.683	0.749	4.66505998673032e-136	1	mm10---Ank1
mm10---Slc35a1	1.76295630010905e-140	0.132674	0.271	0.292	4.72472288429224e-136	1	mm10---Slc35a1
mm10---Gm26691	2.21929195606494e-140	0.332786	0.702	0.699	5.94770244225405e-136	1	mm10---Gm26691
mm10---Nexmif	2.43434601660932e-140	0.293885	0.501	0.463	6.52404732451297e-136	1	mm10---Nexmif
mm10---Slc30a6	2.45627050581112e-140	0.143808	0.277	0.296	6.58280495557381e-136	1	mm10---Slc30a6
mm10---Parm1	2.8538374901358e-140	0.384032	0.278	0.123	7.64828447356394e-136	1	mm10---Parm1
mm10---Phyhipl	3.62520477356222e-140	0.345112	0.348	0.217	9.71554879314674e-136	1	mm10---Phyhipl
mm10---Mcmbp	4.03923806683483e-140	0.117489	0.342	0.382	1.08251580191173e-135	1	mm10---Mcmbp
mm10---Scn3a	4.13333146423634e-140	0.11611	0.598	0.686	1.10773283241534e-135	1	mm10---Scn3a
mm10---Umad1	4.15950253492171e-140	0.113082	0.59	0.667	1.11474667935902e-135	1	mm10---Umad1
mm10---Plppr2	4.86528719163547e-140	0.102559	0.297	0.347	1.30389696735831e-135	1	mm10---Plppr2
mm10---Dtnb	8.40468952350193e-140	0.1435	0.792	0.861	2.25245679229852e-135	1	mm10---Dtnb
mm10---Actl6b	9.01239028674258e-140	0.160493	0.327	0.336	2.41532059684701e-135	1	mm10---Actl6b
mm10---Gm28905	1.12601866022384e-139	0.574884	0.569	0.405	3.01773000939988e-135	1	mm10---Gm28905
mm10---Snx30	1.15637051097213e-139	0.124473	0.396	0.441	3.09907296940531e-135	1	mm10---Snx30
mm10---Casd1	1.25164527419734e-139	0.113971	0.239	0.274	3.35440933484888e-135	1	mm10---Casd1
mm10---Hacd4	1.32536285951008e-139	0.301424	0.318	0.215	3.55197246348702e-135	1	mm10---Hacd4
mm10---Tle4	1.34990706375699e-139	0.20503	0.432	0.457	3.61775093086874e-135	1	mm10---Tle4
mm10---D130040H23Rik	1.46025539062977e-139	0.103492	0.369	0.43	3.91348444688779e-135	1	mm10---D130040H23Rik
mm10---Cyp51	2.04673870502568e-139	0.205928	0.418	0.425	5.48525972946883e-135	1	mm10---Cyp51
mm10---Frmd4b	3.62152629925297e-139	0.347534	0.674	0.615	9.70569048199795e-135	1	mm10---Frmd4b
mm10---Ndufc2	3.99368337941929e-139	0.258078	0.303	0.261	1.07030714568437e-134	1	mm10---Ndufc2
mm10---Ptdss2	4.11173706156602e-139	0.112036	0.326	0.37	1.10194553249969e-134	1	mm10---Ptdss2
mm10---Slc2a8	4.91184012238661e-139	0.219016	0.32	0.287	1.31637315279961e-134	1	mm10---Slc2a8
mm10---Gkap1	5.36292863195083e-139	0.101654	0.404	0.476	1.43726487336282e-134	1	mm10---Gkap1
mm10---Oaz1	5.39649565720054e-139	0.206486	0.376	0.372	1.44626083612975e-134	1	mm10---Oaz1
mm10---Puf60	7.26178537409116e-139	0.112565	0.259	0.295	1.94615848025643e-134	1	mm10---Puf60
mm10---Slc9a6	7.80513281736853e-139	0.170299	0.288	0.288	2.09177559505476e-134	1	mm10---Slc9a6
mm10---Focad	8.37633128731102e-139	0.199389	0.776	0.825	2.24485678499935e-134	1	mm10---Focad
mm10---Gm26749	8.87944968027187e-139	0.211977	0.376	0.363	2.37969251431286e-134	1	mm10---Gm26749
mm10---Slc25a13	1.02645686817256e-138	0.349165	0.329	0.185	2.75090440670246e-134	1	mm10---Slc25a13
mm10---Tmco1	1.04918560705633e-138	0.228555	0.301	0.262	2.81181742691097e-134	1	mm10---Tmco1
mm10---Cdk12	1.08500995043515e-138	0.112233	0.724	0.812	2.9078266671662e-134	1	mm10---Cdk12
mm10---Btf3l4	1.61247977430457e-138	0.147036	0.302	0.32	4.32144579513626e-134	1	mm10---Btf3l4
mm10---Spns1	1.97960298173629e-138	0.12702	0.269	0.292	5.30533599105326e-134	1	mm10---Spns1
mm10---Tmem169	2.02074238797132e-138	0.116062	0.306	0.349	5.41558959976313e-134	1	mm10---Tmem169
mm10---H3f3b	2.54814976972979e-138	0.264997	0.392	0.352	6.82904138287583e-134	1	mm10---H3f3b
mm10---Tvp23a	3.3994096463314e-138	0.18713	0.284	0.269	9.11041785216815e-134	1	mm10---Tvp23a
mm10---Gabpb2	4.01382979015954e-138	0.110548	0.304	0.354	1.07570638376276e-133	1	mm10---Gabpb2
mm10---Xndc1	4.43733594722532e-138	0.124574	0.288	0.33	1.18920603385639e-133	1	mm10---Xndc1
mm10---Tgoln1	4.57717938299198e-138	0.243757	0.306	0.263	1.22668407464185e-133	1	mm10---Tgoln1
mm10---Ccdc57	4.98468785028551e-138	0.121964	0.359	0.409	1.33589634387652e-133	1	mm10---Ccdc57
mm10---Zfp609	5.06178153070543e-138	0.138666	0.694	0.769	1.35655745022905e-133	1	mm10---Zfp609
mm10---Gm20642	6.05189283197993e-138	0.33637	0.886	0.843	1.62190727897062e-133	1	mm10---Gm20642
mm10---Sgpl1	7.361141626487e-138	0.112677	0.271	0.309	1.97278595589852e-133	1	mm10---Sgpl1
mm10---Lclat1	7.40713118234239e-138	0.112023	0.381	0.435	1.98511115686776e-133	1	mm10---Lclat1
mm10---Selenom	7.71615254549955e-138	0.150847	0.25	0.263	2.06792888219388e-133	1	mm10---Selenom
mm10---Fndc9	7.74348553292494e-138	0.12386	0.38	0.432	2.07525412282388e-133	1	mm10---Fndc9
mm10---Pds5b	8.51661977385665e-138	0.151924	0.53	0.585	2.28245409939358e-133	1	mm10---Pds5b
mm10---Nono	1.06427355663945e-137	0.142263	0.313	0.335	2.85225313179374e-133	1	mm10---Nono
mm10---Ache	1.15461270735428e-137	0.274329	0.413	0.368	3.09436205570947e-133	1	mm10---Ache
mm10---Tpk1	1.27005440612721e-137	0.206461	0.375	0.377	3.40374580842093e-133	1	mm10---Tpk1
mm10---Gm5441	1.32738517938645e-137	0.276139	0.376	0.318	3.55739228075569e-133	1	mm10---Gm5441
mm10---Fancc	2.23998995830168e-137	0.105842	0.281	0.327	6.0031730882485e-133	1	mm10---Fancc
mm10---Kdm6b	2.56080385870068e-137	0.139461	0.298	0.325	6.86295434131782e-133	1	mm10---Kdm6b
mm10---Zfp955b	2.8642399741099e-137	0.130259	0.25	0.264	7.67616313061452e-133	1	mm10---Zfp955b
mm10---Zmym5	3.11649493508059e-137	0.125022	0.356	0.402	8.35220642601598e-133	1	mm10---Zmym5
mm10---Prkar2a	3.2999235001296e-137	0.125986	0.335	0.378	8.84379498034734e-133	1	mm10---Prkar2a
mm10---Slc35b1	3.77750437143376e-137	0.143304	0.323	0.352	1.01237117154425e-132	1	mm10---Slc35b1
mm10---Gm15614	4.05216350086554e-137	0.272925	0.372	0.318	1.08597981823196e-132	1	mm10---Gm15614
mm10---Fra10ac1	4.15389530208624e-137	0.218829	0.331	0.304	1.11324394095911e-132	1	mm10---Fra10ac1
mm10---Zfp112	4.57674750708825e-137	0.128883	0.258	0.275	1.22656833189965e-132	1	mm10---Zfp112
mm10---Psma2	5.11090496123196e-137	0.150348	0.284	0.293	1.36972252961016e-132	1	mm10---Psma2
mm10---Emc4	5.87454032237546e-137	0.169575	0.265	0.268	1.57437680639662e-132	1	mm10---Emc4
mm10---Pak3	8.32377802061614e-137	0.247291	0.848	0.867	2.23077250952513e-132	1	mm10---Pak3
mm10---Pcdh11x	8.47148509187582e-137	0.58987	0.473	0.376	2.27035800462272e-132	1	mm10---Pcdh11x
mm10---Nedd4	1.10614835628963e-136	0.13276	0.786	0.859	2.96447759485622e-132	1	mm10---Nedd4
mm10---Pcdh19	1.46450331351395e-136	0.394961	0.408	0.283	3.92486888021739e-132	1	mm10---Pcdh19
mm10---Rnf185	1.75371128475032e-136	0.104174	0.29	0.334	4.69994624313085e-132	1	mm10---Rnf185
mm10---Soga1	1.76014464268162e-136	0.135628	0.306	0.339	4.71718764238673e-132	1	mm10---Soga1
mm10---Cdh22	1.76752477131742e-136	0.347841	0.271	0.135	4.73696638713067e-132	1	mm10---Cdh22
mm10---Adcyap1r1	2.08226593420085e-136	0.201551	0.269	0.245	5.58047270365828e-132	1	mm10---Adcyap1r1
mm10---Slc16a7	2.09369402701371e-136	0.16903	0.477	0.517	5.61109999239674e-132	1	mm10---Slc16a7
mm10---Rab3a	2.60986327865794e-136	0.168489	0.296	0.307	6.99443358680327e-132	1	mm10---Rab3a
mm10---Gid4	2.74458847188065e-136	0.186499	0.305	0.298	7.35549710464015e-132	1	mm10---Gid4
mm10---Nipal3	3.53199399670761e-136	0.113818	0.297	0.339	9.46574391117638e-132	1	mm10---Nipal3
mm10---Kdelr1	4.16738665070646e-136	0.162392	0.268	0.266	1.11685962238933e-131	1	mm10---Kdelr1
mm10---Slc17a6	4.58930558190444e-136	0.287494	0.804	0.808	1.22993389595039e-131	1	mm10---Slc17a6
mm10---Tpi1	4.92539270151866e-136	0.170466	0.276	0.278	1.320005244007e-131	1	mm10---Tpi1
mm10---Rap1a	5.45506403630835e-136	0.100124	0.381	0.443	1.46195716173064e-131	1	mm10---Rap1a
mm10---Ctsd	6.80098611319999e-136	0.243967	0.302	0.251	1.8226642783376e-131	1	mm10---Ctsd
mm10---Sgsm2	7.42765303995232e-136	0.169548	0.403	0.427	1.99061101470722e-131	1	mm10---Sgsm2
mm10---Sfxn1	1.07535990978729e-135	0.115831	0.313	0.351	2.88196455822993e-131	1	mm10---Sfxn1
mm10---Tfrc	2.24205639543108e-135	0.161383	0.439	0.462	6.00871113975531e-131	1	mm10---Tfrc
mm10---Stag1	2.40755663427557e-135	0.214218	0.881	0.918	6.45225177985854e-131	1	mm10---Stag1
mm10---Lcorl	2.89005901263817e-135	0.357325	0.552	0.444	7.74535815387031e-131	1	mm10---Lcorl
mm10---Cbarp	3.43727850545309e-135	0.1135	0.334	0.392	9.21190639461428e-131	1	mm10---Cbarp
mm10---Mrpl21	3.93169669519597e-135	0.131152	0.274	0.298	1.05369471431252e-130	1	mm10---Mrpl21
mm10---Pigb	3.93794694258675e-135	0.169948	0.319	0.324	1.05536978061325e-130	1	mm10---Pigb
mm10---Zfp62	4.03829336280813e-135	0.105532	0.286	0.327	1.08226262123258e-130	1	mm10---Zfp62
mm10---Hlcs	4.66351969045666e-135	0.10575	0.476	0.551	1.24982327704239e-130	1	mm10---Hlcs
mm10---Tmem120b	5.64026814469728e-135	0.124274	0.296	0.326	1.51159186277887e-130	1	mm10---Tmem120b
mm10---Rpl11	6.23692142123896e-135	0.199026	0.31	0.292	1.67149494089204e-130	1	mm10---Rpl11
mm10---Sepsecs	6.68121015323565e-135	0.139596	0.272	0.284	1.79056432106715e-130	1	mm10---Sepsecs
mm10---Pgam5	7.42228260753888e-135	0.168948	0.285	0.284	1.98917173882042e-130	1	mm10---Pgam5
mm10---Ndufs5	1.30927509328387e-134	0.125544	0.25	0.27	3.50885725000077e-130	1	mm10---Ndufs5
mm10---Spred2	1.52909229558614e-134	0.21738	0.581	0.605	4.09796735217086e-130	1	mm10---Spred2
mm10---Zfp983	1.86297627755094e-134	0.104161	0.313	0.359	4.99277642383653e-130	1	mm10---Zfp983
mm10---Stau2	1.95472840228467e-134	0.232537	0.882	0.911	5.23867211812292e-130	1	mm10---Stau2
mm10---Gpatch11	2.00820661329068e-134	0.100888	0.239	0.279	5.38199372361901e-130	1	mm10---Gpatch11
mm10---Cep192	2.02004899447067e-134	0.147664	0.301	0.316	5.4137313051814e-130	1	mm10---Cep192
mm10---Gm49961	2.10629305329356e-134	0.274401	0.317	0.263	5.64486538282674e-130	1	mm10---Gm49961
mm10---Prkca	2.95024268160634e-134	0.321888	0.544	0.351	7.906650386705e-130	1	mm10---Prkca
mm10---Epdr1	3.2241700797938e-134	0.102022	0.286	0.33	8.64077581384739e-130	1	mm10---Epdr1
mm10---Tspyl4	3.29708739985279e-134	0.171642	0.314	0.317	8.83619423160549e-130	1	mm10---Tspyl4
mm10---Mettl26	3.41785754413272e-134	0.136229	0.255	0.277	9.15985821827569e-130	1	mm10---Mettl26
mm10---Crat	3.62492567152711e-134	0.107966	0.239	0.274	9.71480079969265e-130	1	mm10---Crat
mm10---Retreg2	4.2321074697319e-134	0.123348	0.259	0.293	1.13420480188815e-129	1	mm10---Retreg2
mm10---Ccdc107	4.86651061049166e-134	0.20491	0.286	0.271	1.30422484361177e-129	1	mm10---Ccdc107
mm10---Gm1992	5.9695857678198e-134	0.131729	0.46	0.523	1.59984898577571e-129	1	mm10---Gm1992
mm10---Morf4l2	7.41561486660212e-134	0.121026	0.285	0.317	1.98738478424937e-129	1	mm10---Morf4l2
mm10---Tsc22d4	1.17952905598641e-133	0.197207	0.326	0.314	3.16113787004359e-129	1	mm10---Tsc22d4
mm10---Zfp955a	1.56416114712933e-133	0.133223	0.24	0.251	4.1919518743066e-129	1	mm10---Zfp955a
mm10---Ube2k	2.26546534039341e-133	0.102326	0.726	0.813	6.07144711225433e-129	1	mm10---Ube2k
mm10---Orc5	2.3369306920837e-133	0.112003	0.249	0.276	6.26297425478433e-129	1	mm10---Orc5
mm10---Spag1	3.041068027231e-133	0.168043	0.267	0.26	8.15006231297907e-129	1	mm10---Spag1
mm10---Efcab2	3.29340561693733e-133	0.166848	0.291	0.302	8.82632705339205e-129	1	mm10---Efcab2
mm10---C030047K22Rik	4.21494816368274e-133	0.30425	0.276	0.202	1.12960610786698e-128	1	mm10---C030047K22Rik
mm10---Ppp1r9a	4.40396566266261e-133	0.194142	0.809	0.87	1.18026279759358e-128	1	mm10---Ppp1r9a
mm10---Gabra2	7.35542120694303e-133	0.413766	0.627	0.519	1.97125288346073e-128	1	mm10---Gabra2
mm10---Ubqln4	7.44570708452062e-133	0.114254	0.245	0.268	1.99544949865153e-128	1	mm10---Ubqln4
mm10---Chd6	8.03194248690859e-133	0.151194	0.827	0.892	2.1525605864915e-128	1	mm10---Chd6
mm10---Exosc7	1.10915446498865e-132	0.149329	0.303	0.319	2.97253396616958e-128	1	mm10---Exosc7
mm10---Syp	1.16861040756326e-132	0.134695	0.744	0.821	3.13187589226954e-128	1	mm10---Syp
mm10---Brinp3	1.53825803637039e-132	0.370316	0.848	0.793	4.12253153747263e-128	1	mm10---Brinp3
mm10---Utp18	1.6616945856415e-132	0.10139	0.281	0.323	4.45334148951923e-128	1	mm10---Utp18
mm10---Tmem60	2.26802795330156e-132	0.213131	0.255	0.215	6.07831491484818e-128	1	mm10---Tmem60
mm10---Wnk3	3.22492410540565e-132	0.209593	0.335	0.315	8.64279660248715e-128	1	mm10---Wnk3
mm10---Derl1	6.39337857032705e-132	0.118375	0.232	0.257	1.71342545684765e-127	1	mm10---Derl1
mm10---Angptl2	7.46599658484402e-132	0.181148	0.288	0.281	2.0008870847382e-127	1	mm10---Angptl2
mm10---Klhl33	7.57876842602915e-132	0.251509	0.267	0.198	2.03110993817581e-127	1	mm10---Klhl33
mm10---Trmt6	1.10311382548258e-131	0.114106	0.277	0.312	2.95634505229333e-127	1	mm10---Trmt6
mm10---Nagk	1.35306337588442e-131	0.24771	0.382	0.348	3.62620984737025e-127	1	mm10---Nagk
mm10---Hjurp	1.53650842867643e-131	0.169205	0.338	0.341	4.11784258885283e-127	1	mm10---Hjurp
mm10---Ptprn	2.72433953032033e-131	0.16166	0.784	0.857	7.30122994125849e-127	1	mm10---Ptprn
mm10---Opcml	5.89972699705884e-131	0.243933	0.983	0.97	1.58112683521177e-126	1	mm10---Opcml
mm10---Otulin	6.18367377958502e-131	0.152215	0.339	0.358	1.65722457292879e-126	1	mm10---Otulin
mm10---Klhl26	6.40905529098303e-131	0.122351	0.262	0.287	1.71762681798345e-126	1	mm10---Klhl26
mm10---Nucb1	8.43379231640747e-131	0.230772	0.278	0.222	2.2602563407972e-126	1	mm10---Nucb1
mm10---Gm12239	9.32516426598535e-131	0.431987	0.306	0.188	2.49914402328407e-126	1	mm10---Gm12239
mm10---Sc5d	1.40749406702854e-130	0.207392	0.306	0.286	3.77208409963648e-126	1	mm10---Sc5d
mm10---Dmac2	1.41362573457512e-130	0.173536	0.285	0.277	3.78851696866133e-126	1	mm10---Dmac2
mm10---Ddx18	1.46172961334728e-130	0.125656	0.228	0.25	3.91743536377071e-126	1	mm10---Ddx18
mm10---3830406C13Rik	1.70892381165701e-130	0.165834	0.331	0.343	4.57991581524078e-126	1	mm10---3830406C13Rik
mm10---Tmod3	1.75684889382502e-130	0.150885	0.338	0.354	4.70835503545106e-126	1	mm10---Tmod3
mm10---Gm10419	2.17448037710574e-130	0.11763	0.269	0.295	5.82760741064338e-126	1	mm10---Gm10419
mm10---Dtnbos	2.48964039035925e-130	0.208075	0.326	0.309	6.67223624616278e-126	1	mm10---Dtnbos
mm10---Man2b1	3.15312525516914e-130	0.11822	0.262	0.291	8.45037568385331e-126	1	mm10---Man2b1
mm10---Trpm3	4.15135912538404e-130	0.110125	0.819	0.697	1.11256424560292e-125	1	mm10---Trpm3
mm10---Cox7c	4.20187751435205e-130	0.173812	0.381	0.391	1.12610317384635e-125	1	mm10---Cox7c
mm10---Vac14	4.73760158779981e-130	0.114655	0.235	0.259	1.26967722553035e-125	1	mm10---Vac14
mm10---Neto2	4.74782266054144e-130	0.222775	0.323	0.319	1.27241647302511e-125	1	mm10---Neto2
mm10---Stmn2	5.07408921764112e-130	0.198464	0.716	0.755	1.35985591032782e-125	1	mm10---Stmn2
mm10---Ppwd1	6.74053244729023e-130	0.116013	0.278	0.312	1.80646269587378e-125	1	mm10---Ppwd1
mm10---Tut4	7.80704283032256e-130	0.145958	0.746	0.819	2.09228747852645e-125	1	mm10---Tut4
mm10---Msmo1	8.71462102095462e-130	0.272054	0.321	0.269	2.33551843361584e-125	1	mm10---Msmo1
mm10---Rell2	9.30979695259431e-130	0.13836	0.28	0.296	2.49502558329528e-125	1	mm10---Rell2
mm10---Uevld	9.79614155090934e-130	0.168573	0.304	0.311	2.6253659356437e-125	1	mm10---Uevld
mm10---Fam189b	1.02785240249384e-129	0.101087	0.3	0.346	2.75464443868349e-125	1	mm10---Fam189b
mm10---Snapc1	1.94177463209795e-129	0.132094	0.274	0.294	5.20395601402252e-125	1	mm10---Snapc1
mm10---Ino80dos	2.16655139257781e-129	0.112402	0.35	0.401	5.80635773210854e-125	1	mm10---Ino80dos
mm10---Cfl2	2.25515872174451e-129	0.160734	0.266	0.264	6.04382537427529e-125	1	mm10---Cfl2
mm10---Snx12	2.79817647676994e-129	0.115245	0.37	0.425	7.49911295774345e-125	1	mm10---Snx12
mm10---Rpl21	3.37047713128635e-129	0.139104	0.25	0.264	9.03287871184743e-125	1	mm10---Rpl21
mm10---Sh3pxd2a	3.54265253239106e-129	0.198244	0.352	0.339	9.49430878680805e-125	1	mm10---Sh3pxd2a
mm10---Naca	3.62065607990617e-129	0.161072	0.273	0.272	9.70335829414853e-125	1	mm10---Naca
mm10---1700012D14Rik	5.26815416612125e-129	0.172405	0.391	0.417	1.4118653165205e-124	1	mm10---1700012D14Rik
mm10---Gm20721	5.28321948824281e-129	0.2299	0.255	0.195	1.41590282284907e-124	1	mm10---Gm20721
mm10---Zbtb7a	6.45984003316543e-129	0.113984	0.324	0.362	1.73123712888833e-124	1	mm10---Zbtb7a
mm10---Coq3	6.69793922253976e-129	0.171909	0.341	0.347	1.79504771164066e-124	1	mm10---Coq3
mm10---Cyth3	7.1924781203878e-129	0.178569	0.368	0.373	1.92758413626393e-124	1	mm10---Cyth3
mm10---Acaca	8.18506384704905e-129	0.175459	0.78	0.832	2.19359711100914e-124	1	mm10---Acaca
mm10---Endod1	1.05640269293417e-128	0.262473	0.265	0.175	2.83115921706358e-124	1	mm10---Endod1
mm10---Sh3gl3	1.23665768335922e-128	0.290637	0.315	0.235	3.3142425914027e-124	1	mm10---Sh3gl3
mm10---Camkmt	1.34860351290857e-128	0.130723	0.648	0.726	3.61425741459496e-124	1	mm10---Camkmt
mm10---Pdcd2l	2.39003302877241e-128	0.124573	0.234	0.253	6.40528851711006e-124	1	mm10---Pdcd2l
mm10---Pgm2l1	3.10966783573266e-128	0.117362	0.356	0.404	8.33390979976352e-124	1	mm10---Pgm2l1
mm10---Trit1	5.06217903876275e-128	0.130271	0.283	0.303	1.35666398238842e-123	1	mm10---Trit1
mm10---Mapk11	5.24397891985176e-128	0.110169	0.282	0.322	1.40538635052027e-123	1	mm10---Mapk11
mm10---Riok2	5.31575294094678e-128	0.11304	0.241	0.264	1.42462178817374e-123	1	mm10---Riok2
mm10---Zbtb44	5.93602278712028e-128	0.195111	0.328	0.31	1.59085410694823e-123	1	mm10---Zbtb44
mm10---Plekhh2	7.02641048885435e-128	0.136341	0.321	0.358	1.88307801101297e-123	1	mm10---Plekhh2
mm10---Pbx4	7.52542010222094e-128	0.266344	0.327	0.265	2.01681258739521e-123	1	mm10---Pbx4
mm10---Rabgap1	7.653860388229e-128	0.122519	0.818	0.892	2.05123458404537e-123	1	mm10---Rabgap1
mm10---Fnbp1l	1.01487423000207e-127	0.413686	0.519	0.354	2.71986293640554e-123	1	mm10---Fnbp1l
mm10---Tcp1	1.94804995063051e-127	0.139497	0.257	0.266	5.22077386768977e-123	1	mm10---Tcp1
mm10---Selenok	2.40244544335438e-127	0.203772	0.288	0.268	6.43855378818974e-123	1	mm10---Selenok
mm10---Arhgef4	2.41568380087431e-127	0.116059	0.282	0.315	6.47403258634314e-123	1	mm10---Arhgef4
mm10---Gm15520	2.42855849100922e-127	0.264678	0.292	0.232	6.5085367559047e-123	1	mm10---Gm15520
mm10---Ash1l	3.01992907723056e-127	0.122235	0.786	0.861	8.09340992697789e-123	1	mm10---Ash1l
mm10---Gng3	3.46014587573076e-127	0.179749	0.28	0.266	9.27319094695844e-123	1	mm10---Gng3
mm10---Cacna1i	4.61248901595282e-127	0.319325	0.291	0.145	1.23614705627536e-122	1	mm10---Cacna1i
mm10---Exosc1	4.61486084140932e-127	0.142028	0.256	0.269	1.2367827054977e-122	1	mm10---Exosc1
mm10---Ddx21	7.17326533694329e-127	0.144346	0.252	0.257	1.9224351103008e-122	1	mm10---Ddx21
mm10---Diaph1	7.47171262163728e-127	0.11451	0.338	0.376	2.00241898259879e-122	1	mm10---Diaph1
mm10---Hs3st4	1.1349808860606e-126	0.222849	0.568	0.375	3.0417487746424e-122	1	mm10---Hs3st4
mm10---Fibp	1.17916693537607e-126	0.139675	0.279	0.297	3.16016738680786e-122	1	mm10---Fibp
mm10---Ndst4	1.221170600088e-126	0.496202	0.302	0.15	3.27273720823583e-122	1	mm10---Ndst4
mm10---Tbc1d9	1.73912095069825e-126	0.10092	0.383	0.437	4.66084414787132e-122	1	mm10---Tbc1d9
mm10---Mri1	2.17100975425206e-126	0.123441	0.249	0.274	5.81830614139553e-122	1	mm10---Mri1
mm10---Gm10649	2.55218602852594e-126	0.208581	0.399	0.403	6.83985855644953e-122	1	mm10---Gm10649
mm10---Pcdh10	4.23793311073147e-126	0.24829	0.483	0.485	1.13576607367603e-121	1	mm10---Pcdh10
mm10---Zfp335os	4.30610279926853e-126	0.107647	0.218	0.257	1.15403555020397e-121	1	mm10---Zfp335os
mm10---Stx6	4.36729738906377e-126	0.123775	0.307	0.335	1.17043570026909e-121	1	mm10---Stx6
mm10---Gm26672	5.5859071711101e-126	0.249489	0.283	0.218	1.49702312185751e-121	1	mm10---Gm26672
mm10---Asb13	5.8692038307069e-126	0.136005	0.307	0.326	1.57294662662945e-121	1	mm10---Asb13
mm10---Dhps	8.00362918443928e-126	0.19361	0.339	0.331	2.14497262142973e-121	1	mm10---Dhps
mm10---Rapgefl1	9.57721695925116e-126	0.128746	0.313	0.338	2.56669414507931e-121	1	mm10---Rapgefl1
mm10---Pnmal2	1.30336883561253e-125	0.295457	0.3	0.205	3.49302847944158e-121	1	mm10---Pnmal2
mm10---Ndufa4	1.35876904960683e-125	0.206579	0.29	0.268	3.64150105294631e-121	1	mm10---Ndufa4
mm10---Greb1l	1.49267419019081e-125	0.223806	0.494	0.499	4.00036682971136e-121	1	mm10---Greb1l
mm10---Timm17a	1.68063107789602e-125	0.115822	0.271	0.298	4.50409128876134e-121	1	mm10---Timm17a
mm10---P2ry12	1.81903701408792e-125	0.248896	0.302	0.252	4.87501919775563e-121	1	mm10---P2ry12
mm10---Hnrnpf	1.94425638102274e-125	0.101861	0.267	0.3	5.21060710114095e-121	1	mm10---Hnrnpf
mm10---Ppcdc	2.36597072891223e-125	0.108746	0.325	0.369	6.34080155348477e-121	1	mm10---Ppcdc
mm10---Tbl3	2.71004445771859e-125	0.133215	0.245	0.265	7.26291914668582e-121	1	mm10---Tbl3
mm10---Herpud1	2.78678108497175e-125	0.155298	0.305	0.314	7.46857330772429e-121	1	mm10---Herpud1
mm10---Isy1	2.86889557586222e-125	0.151925	0.266	0.269	7.68864014331075e-121	1	mm10---Isy1
mm10---Gsk3b	3.10186082033806e-125	0.12324	0.781	0.851	8.31298699850599e-121	1	mm10---Gsk3b
mm10---Tcf20	3.20125471675792e-125	0.187673	0.839	0.888	8.57936264091123e-121	1	mm10---Tcf20
mm10---Gm38604	3.44433035664449e-125	0.158299	0.267	0.276	9.23080535580723e-121	1	mm10---Gm38604
mm10---Tsga10	3.82398378110711e-125	0.152688	0.302	0.315	1.02482765333671e-120	1	mm10---Tsga10
mm10---Rrp1	3.84623053283914e-125	0.129639	0.252	0.272	1.03078978280089e-120	1	mm10---Rrp1
mm10---Ndufb2	4.57199790505813e-125	0.140944	0.251	0.257	1.22529543855558e-120	1	mm10---Ndufb2
mm10---Fbn1	4.95394762016005e-125	0.286998	0.317	0.219	1.32765796220289e-120	1	mm10---Fbn1
mm10---Cdc26	9.95521582374352e-125	0.170275	0.286	0.278	2.66799784076326e-120	1	mm10---Cdc26
mm10---Gpsm1	1.1128899034051e-124	0.219425	0.275	0.23	2.98254494112567e-120	1	mm10---Gpsm1
mm10---Sfxn4	1.21840077090681e-124	0.189777	0.275	0.248	3.26531406603025e-120	1	mm10---Sfxn4
mm10---Oxa1l	1.28357244082116e-124	0.185503	0.272	0.249	3.43997414140071e-120	1	mm10---Oxa1l
mm10---Rpl5	1.49355645365866e-124	0.118772	0.252	0.276	4.0027312958052e-120	1	mm10---Rpl5
mm10---Dock2	2.01651565476929e-124	0.307906	0.273	0.145	5.40426195478171e-120	1	mm10---Dock2
mm10---Gm42477	2.34314745238744e-124	0.23006	0.282	0.239	6.27963517239835e-120	1	mm10---Gm42477
mm10---Ptpro	2.60384518657482e-124	0.399299	0.396	0.244	6.97830510002051e-120	1	mm10---Ptpro
mm10---Cystm1	5.85336550210447e-124	0.207323	0.277	0.233	1.568701954564e-119	1	mm10---Cystm1
mm10---Nrsn1	6.09707157214505e-124	0.148875	0.245	0.254	1.63401518133487e-119	1	mm10---Nrsn1
mm10---Armcx3	6.7356468750329e-124	0.112956	0.258	0.277	1.80515336250882e-119	1	mm10---Armcx3
mm10---Rnpep	7.19220672364653e-124	0.172775	0.316	0.32	1.92751140193727e-119	1	mm10---Rnpep
mm10---Ccdc90b	8.1916543149669e-124	0.158307	0.275	0.275	2.19536335641113e-119	1	mm10---Ccdc90b
mm10---Scpep1os	8.93192620406669e-124	0.293793	0.277	0.186	2.39375622268987e-119	1	mm10---Scpep1os
mm10---Kazn	9.48318577917124e-124	0.107235	0.301	0.339	2.54149378881789e-119	1	mm10---Kazn
mm10---Rlim	1.22697847143346e-123	0.144268	0.257	0.262	3.28830230344168e-119	1	mm10---Rlim
mm10---Paqr3	1.24091274317435e-123	0.10078	0.228	0.256	3.32564615170727e-119	1	mm10---Paqr3
mm10---Pkig	1.42627143571998e-123	0.246775	0.364	0.321	3.82240744772955e-119	1	mm10---Pkig
mm10---Sbds	1.49557598384545e-123	0.175939	0.28	0.272	4.0081436367058e-119	1	mm10---Sbds
mm10---Malat1	2.0057078531237e-123	0.136201	1	1	5.37529704637151e-119	1	mm10---Malat1
mm10---Gm29514	2.20493348153271e-123	0.276021	0.402	0.351	5.90922173050765e-119	1	mm10---Gm29514
mm10---Khdrbs2	2.36014287255253e-123	0.406067	0.826	0.789	6.32518289844079e-119	1	mm10---Khdrbs2
mm10---Carf	3.56067639721487e-123	0.107771	0.278	0.312	9.54261274453584e-119	1	mm10---Carf
mm10---Gas5	4.35113892882274e-123	0.106888	0.283	0.326	1.1661052329245e-118	1	mm10---Gas5
mm10---Rpl3	4.40237335770776e-123	0.139393	0.253	0.266	1.17983605986568e-118	1	mm10---Rpl3
mm10---Zdhhc2	5.44609836325562e-123	0.123004	0.44	0.501	1.45955436135251e-118	1	mm10---Zdhhc2
mm10---Fam131a	8.15521108707293e-123	0.118783	0.314	0.345	2.18559657133554e-118	1	mm10---Fam131a
mm10---Selenof	1.04724889348181e-122	0.156157	0.254	0.255	2.80662703453126e-118	1	mm10---Selenof
mm10---Lrrtm3	1.22715017727291e-122	0.309163	0.878	0.86	3.28876247509141e-118	1	mm10---Lrrtm3
mm10---Gm36198	1.60309964140368e-122	0.212265	0.263	0.223	4.29630703896186e-118	1	mm10---Gm36198
mm10---Tmem39b	1.6788460549981e-122	0.117453	0.259	0.287	4.49930742739491e-118	1	mm10---Tmem39b
mm10---Ezh1	4.96054686596141e-122	0.137806	0.286	0.3	1.32942656007766e-117	1	mm10---Ezh1
mm10---Crebl2	6.81808337077305e-122	0.101232	0.247	0.282	1.82724634336718e-117	1	mm10---Crebl2
mm10---Gse1	7.03568065478885e-122	0.166572	0.705	0.755	1.88556241548341e-117	1	mm10---Gse1
mm10---Flrt3	7.21806615814604e-122	0.208011	0.43	0.43	1.93444173038314e-117	1	mm10---Flrt3
mm10---Emc1	8.03578052843944e-122	0.108147	0.252	0.278	2.15358918162177e-117	1	mm10---Emc1
mm10---Arfgap2	8.7946954761311e-122	0.102834	0.229	0.26	2.35697838760313e-117	1	mm10---Arfgap2
mm10---Eefsec	1.15551369317266e-121	0.138784	0.383	0.414	3.09677669770273e-117	1	mm10---Eefsec
mm10---Ntan1	1.25956682289223e-121	0.120599	0.276	0.305	3.37563908535118e-117	1	mm10---Ntan1
mm10---Grb10	1.44953946035271e-121	0.280783	0.724	0.699	3.88476575374525e-117	1	mm10---Grb10
mm10---Glt1d1	1.50583947893379e-121	0.121655	0.359	0.401	4.03564980354256e-117	1	mm10---Glt1d1
mm10---Ube4bos1	1.77675615183139e-121	0.106935	0.257	0.291	4.76170648690811e-117	1	mm10---Ube4bos1
mm10---Gm12709	1.85118761335787e-121	0.155296	0.303	0.313	4.96118280379908e-117	1	mm10---Gm12709
mm10---Bcan	2.30571554436156e-121	0.232373	0.312	0.268	6.17931765888899e-117	1	mm10---Bcan
mm10---Amz2	2.5188924886563e-121	0.125759	0.251	0.274	6.75063186959889e-117	1	mm10---Amz2
mm10---Plcxd3	3.04730606682616e-121	0.363118	0.494	0.311	8.1667802590941e-117	1	mm10---Plcxd3
mm10---4930509J09Rik	5.26787631621255e-121	0.130892	0.205	0.252	1.41179085274496e-116	1	mm10---4930509J09Rik
mm10---Gm39090	5.97141465871966e-121	0.162466	0.258	0.26	1.60033912853687e-116	1	mm10---Gm39090
mm10---Gm3448	8.61599166002619e-121	0.18638	0.281	0.255	2.30908576488702e-116	1	mm10---Gm3448
mm10---Ssbp1	9.8153498227633e-121	0.112591	0.23	0.251	2.63051375250056e-116	1	mm10---Ssbp1
mm10---Pigk	1.0121734131044e-120	0.116522	0.623	0.697	2.71262474711978e-116	1	mm10---Pigk
mm10---Rpl9	1.64176549327338e-120	0.167858	0.277	0.268	4.39993152197265e-116	1	mm10---Rpl9
mm10---Chd5	1.84816805148194e-120	0.174024	0.416	0.426	4.9530903779716e-116	1	mm10---Chd5
mm10---Gm15892	1.97245050641052e-120	0.171123	0.27	0.258	5.28616735718018e-116	1	mm10---Gm15892
mm10---Gm12353	4.98779701810288e-120	0.215529	0.523	0.519	1.33672960085157e-115	1	mm10---Gm12353
mm10---Tmed8	5.90322842189571e-120	0.102178	0.24	0.27	1.58206521706805e-115	1	mm10---Tmed8
mm10---4930570B17Rik	7.00949902858666e-120	0.186541	0.412	0.425	1.87854573966123e-115	1	mm10---4930570B17Rik
mm10---Als2	7.27376030256034e-120	0.115797	0.305	0.337	1.94936776108617e-115	1	mm10---Als2
mm10---Nr6a1os	7.91226061423649e-120	0.205104	0.332	0.303	2.12048584461538e-115	1	mm10---Nr6a1os
mm10---Lsm12	9.21476306629599e-120	0.112421	0.246	0.268	2.46955650176733e-115	1	mm10---Lsm12
mm10---Shd	9.25518340802107e-120	0.109283	0.227	0.254	2.48038915334965e-115	1	mm10---Shd
mm10---Lrif1	1.00195542481017e-119	0.119724	0.317	0.348	2.68524053849126e-115	1	mm10---Lrif1
mm10---1700084C06Rik	1.07555099881272e-119	0.151627	0.314	0.334	2.8824766768181e-115	1	mm10---1700084C06Rik
mm10---5730522E02Rik	1.74442067220286e-119	0.403705	0.618	0.512	4.67504740150366e-115	1	mm10---5730522E02Rik
mm10---Cdkl3	1.78312542077719e-119	0.151159	0.416	0.453	4.77877612768286e-115	1	mm10---Cdkl3
mm10---Ssbp4	1.92306416591212e-119	0.194388	0.281	0.265	5.15381196464447e-115	1	mm10---Ssbp4
mm10---Slc35g2	3.24835677203562e-119	0.213923	0.255	0.204	8.70559614905546e-115	1	mm10---Slc35g2
mm10---Dpysl3	3.60252518694702e-119	0.131489	0.488	0.535	9.65476750101801e-115	1	mm10---Dpysl3
mm10---Mrps21	4.03066365400597e-119	0.156934	0.268	0.268	1.0802178592736e-114	1	mm10---Mrps21
mm10---Nfe2l1	4.54080354774472e-119	0.123391	0.292	0.314	1.21693535079558e-114	1	mm10---Nfe2l1
mm10---Hdhd2	4.77911868918954e-119	0.122749	0.24	0.253	1.2808038087028e-114	1	mm10---Hdhd2
mm10---Actg1	5.24908815027617e-119	0.113473	0.24	0.269	1.40675562427401e-114	1	mm10---Actg1
mm10---3010001F23Rik	6.44584480698515e-119	0.137815	0.252	0.264	1.72748640827202e-114	1	mm10---3010001F23Rik
mm10---B3galt2	6.65938085533199e-119	0.160584	0.282	0.284	1.78471406922897e-114	1	mm10---B3galt2
mm10---2610021A01Rik	8.91901613047432e-119	0.17006	0.253	0.235	2.39029632296712e-114	1	mm10---2610021A01Rik
mm10---Orc6	9.54315267734211e-119	0.184036	0.257	0.245	2.55756491752768e-114	1	mm10---Orc6
mm10---Rtl1	9.74941543224285e-119	0.204806	0.29	0.251	2.61284333584108e-114	1	mm10---Rtl1
mm10---Sh3rf1	1.11136849583097e-118	0.353058	0.44	0.315	2.978467568827e-114	1	mm10---Sh3rf1
mm10---Dpy30	1.30723306836373e-118	0.181442	0.268	0.248	3.5033846232148e-114	1	mm10---Dpy30
mm10---2210408I21Rik	1.42422114567127e-118	0.189429	0.722	0.774	3.81691267039901e-114	1	mm10---2210408I21Rik
mm10---Lamtor4	2.16452797377233e-118	0.161659	0.261	0.259	5.80093496970984e-114	1	mm10---Lamtor4
mm10---Bcap29	2.31492416368284e-118	0.131406	0.237	0.251	6.20399675867e-114	1	mm10---Bcap29
mm10---Fbxo36	3.34065802362591e-118	0.244302	0.309	0.27	8.95296350331744e-114	1	mm10---Fbxo36
mm10---B230209E15Rik	3.69019049089747e-118	0.197046	0.447	0.453	9.88971051560521e-114	1	mm10---B230209E15Rik
mm10---Gucy1a2	4.27977254080532e-118	0.182612	0.829	0.879	1.14697904093583e-113	1	mm10---Gucy1a2
mm10---Fam234a	5.25831936518546e-118	0.132002	0.29	0.312	1.4092295898697e-113	1	mm10---Fam234a
mm10---Ikzf4	5.28261373029661e-118	0.163006	0.26	0.257	1.41574047971949e-113	1	mm10---Ikzf4
mm10---March8	8.45016522357091e-118	0.135736	0.306	0.32	2.264644279917e-113	1	mm10---March8
mm10---Trnau1ap	1.12683573003183e-117	0.115173	0.232	0.251	3.0199197564853e-113	1	mm10---Trnau1ap
mm10---Mkln1os	1.16047207268161e-117	0.147755	0.269	0.267	3.11006515478672e-113	1	mm10---Mkln1os
mm10---Sntb2	1.30386344522888e-117	0.181827	0.461	0.485	3.4943540332134e-113	1	mm10---Sntb2
mm10---Prdx5	1.37431264527505e-117	0.190553	0.288	0.27	3.68315788933712e-113	1	mm10---Prdx5
mm10---Tmem216	1.37571468149318e-117	0.201414	0.273	0.232	3.68691534640172e-113	1	mm10---Tmem216
mm10---Trabd	1.40396890492337e-117	0.10704	0.232	0.253	3.76263666519463e-113	1	mm10---Trabd
mm10---Clcn5	2.13277474963133e-117	0.202003	0.288	0.259	5.71583632901197e-113	1	mm10---Clcn5
mm10---Ugdh	2.16980624050237e-117	0.198973	0.318	0.294	5.81508072454636e-113	1	mm10---Ugdh
mm10---9630028H03Rik	5.00665411653441e-117	0.345814	0.309	0.173	1.34178330323122e-112	1	mm10---9630028H03Rik
mm10---Sycp3	6.09541161011479e-117	0.246581	0.288	0.232	1.63357031151077e-112	1	mm10---Sycp3
mm10---C87436	8.68838513322724e-117	0.130492	0.27	0.291	2.3284872157049e-112	1	mm10---C87436
mm10---Zswim5	3.93566678940793e-116	0.203218	0.37	0.363	1.05475869956133e-111	1	mm10---Zswim5
mm10---Actr8	5.3433631272089e-116	0.108849	0.242	0.265	1.43202131809199e-111	1	mm10---Actr8
mm10---Ltbp3	9.30614308653793e-116	0.159596	0.272	0.265	2.49404634719216e-111	1	mm10---Ltbp3
mm10---Nt5dc1	9.69186281431387e-116	0.173893	0.255	0.239	2.59741923423612e-111	1	mm10---Nt5dc1
mm10---Neto1	9.8101880325567e-116	0.37127	0.326	0.19	2.6291303927252e-111	1	mm10---Neto1
mm10---Tcerg1l	1.04887420342817e-115	0.369425	0.381	0.242	2.81098286518751e-111	1	mm10---Tcerg1l
mm10---Col11a1	1.85955531051934e-115	0.593169	0.279	0.157	4.98360823219183e-111	1	mm10---Col11a1
mm10---Gm11659	2.22564056159783e-115	0.191987	0.341	0.328	5.96471670508218e-111	1	mm10---Gm11659
mm10---D330023K18Rik	3.22246713253235e-115	0.2072	0.281	0.248	8.6362119151867e-111	1	mm10---D330023K18Rik
mm10---Nck2	3.82767082127456e-115	0.109263	0.269	0.299	1.02581578010158e-110	1	mm10---Nck2
mm10---Ankrd44	5.73400371707278e-115	0.245626	0.451	0.414	1.5367129961755e-110	1	mm10---Ankrd44
mm10---Rnf32	7.2896277058463e-115	0.186358	0.26	0.229	1.95362022516681e-110	1	mm10---Rnf32
mm10---Gm47271	7.85639302621322e-115	0.245861	0.332	0.289	2.10551333102514e-110	1	mm10---Gm47271
mm10---Timp4	8.89978240137166e-115	0.229834	0.275	0.223	2.3851416835676e-110	1	mm10---Timp4
mm10---Adamts10	9.02004458356235e-115	0.14931	0.251	0.246	2.41737194839471e-110	1	mm10---Adamts10
mm10---4933424G05Rik	9.83558896075054e-115	0.25507	0.334	0.281	2.63593784148114e-110	1	mm10---4933424G05Rik
mm10---Xrcc5	2.20230971567677e-114	0.114974	0.279	0.306	5.90219003801375e-110	1	mm10---Xrcc5
mm10---Metap1d	2.69925990119122e-114	0.137458	0.305	0.322	7.23401653519248e-110	1	mm10---Metap1d
mm10---Rsl1d1	3.16916726681478e-114	0.119754	0.246	0.261	8.49336827506361e-110	1	mm10---Rsl1d1
mm10---Hint3	5.05597854599863e-114	0.146345	0.256	0.262	1.35500225032763e-109	1	mm10---Hint3
mm10---Gnaq	7.9316877599632e-114	0.137732	0.822	0.883	2.12569231967014e-109	1	mm10---Gnaq
mm10---Pafah1b1	8.00382769848064e-114	0.154529	0.867	0.92	2.14502582319281e-109	1	mm10---Pafah1b1
mm10---Optn	1.15392490712861e-113	0.142607	0.287	0.293	3.09251875110467e-109	1	mm10---Optn
mm10---Gm16189	1.17597912835745e-113	0.199174	0.261	0.234	3.15162406399796e-109	1	mm10---Gm16189
mm10---Tsen2	1.32819703295846e-113	0.11397	0.255	0.277	3.55956804832867e-109	1	mm10---Tsen2
mm10---Cdh7	2.7997871074678e-113	0.111739	0.501	0.58	7.50342944801371e-109	1	mm10---Cdh7
mm10---Atp6ap2	3.11477817691341e-113	0.166302	0.648	0.7	8.34760551412794e-109	1	mm10---Atp6ap2
mm10---Fgf1	4.43686144201117e-113	0.178524	0.355	0.385	1.18907886645899e-108	1	mm10---Fgf1
mm10---Pde6d	2.18721475726385e-112	0.104066	0.244	0.274	5.86173554946711e-108	1	mm10---Pde6d
mm10---Rhbdl3	5.14083872953848e-112	0.283322	0.414	0.243	1.37774477951631e-107	1	mm10---Rhbdl3
mm10---Far1os	5.2674984684292e-112	0.200954	0.33	0.295	1.41168958953902e-107	1	mm10---Far1os
mm10---Tcaim	5.59187584688909e-112	0.109907	0.25	0.281	1.49862272696628e-107	1	mm10---Tcaim
mm10---Ptpre	1.19400880446827e-111	0.296253	0.491	0.421	3.19994359597497e-107	1	mm10---Ptpre
mm10---Rpl19	1.85502021561406e-111	0.155875	0.257	0.252	4.97145417784568e-107	1	mm10---Rpl19
mm10---Gm20404	2.41959980892783e-111	0.176906	0.276	0.254	6.48452748792659e-107	1	mm10---Gm20404
mm10---Rpsa	2.73790910948124e-111	0.213905	0.253	0.212	7.33759641340974e-107	1	mm10---Rpsa
mm10---Zswim7	2.85338650013158e-111	0.100764	0.226	0.258	7.64707582035262e-107	1	mm10---Zswim7
mm10---Kcnh7	3.0138353101562e-111	0.313554	0.857	0.851	8.07707863121862e-107	1	mm10---Kcnh7
mm10---Gtf2e2	3.4116830448319e-111	0.114429	0.236	0.251	9.14331056014949e-107	1	mm10---Gtf2e2
mm10---Rasa3	3.83382405598082e-111	0.107749	0.289	0.316	1.02746484700286e-106	1	mm10---Rasa3
mm10---Efcab1	4.35495681023286e-111	0.264405	0.273	0.197	1.16712842514241e-106	1	mm10---Efcab1
mm10---Elf2	4.37853711673923e-111	0.100463	0.272	0.306	1.17344794728611e-106	1	mm10---Elf2
mm10---Hmgcr	4.92920045280102e-111	0.149706	0.411	0.442	1.32102572135067e-106	1	mm10---Hmgcr
mm10---Scarb1	1.01721113847022e-110	0.276233	0.25	0.143	2.72612585110019e-106	1	mm10---Scarb1
mm10---Man2c1os	1.47652657405575e-110	0.136061	0.277	0.288	3.95709121846941e-106	1	mm10---Man2c1os
mm10---Gm42303	1.85564053519206e-110	0.155599	0.316	0.331	4.97311663431473e-106	1	mm10---Gm42303
mm10---Rapgef4os1	1.97729304897561e-110	0.278511	0.295	0.183	5.29914537125462e-106	1	mm10---Rapgef4os1
mm10---Ctu2	2.0676065445487e-110	0.129197	0.241	0.25	5.54118553939052e-106	1	mm10---Ctu2
mm10---Gm17227	2.24529842684084e-110	0.203432	0.264	0.218	6.01739978393345e-106	1	mm10---Gm17227
mm10---Gm14211	3.50525983051233e-110	0.219827	0.334	0.321	9.39409634577304e-106	1	mm10---Gm14211
mm10---Nalcn	5.22330462870121e-110	0.197752	0.895	0.927	1.39984564049192e-105	1	mm10---Nalcn
mm10---Tuba1a	9.2129080792932e-110	0.118534	0.314	0.352	2.46905936525058e-105	1	mm10---Tuba1a
mm10---Spred1	1.06815798598971e-109	0.1025	0.366	0.411	2.86266340245242e-105	1	mm10---Spred1
mm10---Fth1	1.61768079628358e-109	0.276547	0.52	0.487	4.33538453404e-105	1	mm10---Fth1
mm10---Map2k6	2.24333256024407e-109	0.108622	0.319	0.361	6.01213126145411e-105	1	mm10---Map2k6
mm10---4833422C13Rik	2.2571503861312e-109	0.277445	0.262	0.156	6.04916303483163e-105	1	mm10---4833422C13Rik
mm10---Plgrkt	2.81106216150607e-109	0.110686	0.241	0.261	7.53364659283625e-105	1	mm10---Plgrkt
mm10---Zfp934	2.82533759658092e-109	0.154708	0.316	0.325	7.57190475883687e-105	1	mm10---Zfp934
mm10---Adgrb3	3.01417030690091e-109	0.264044	0.997	0.993	8.07797642249444e-105	1	mm10---Adgrb3
mm10---Carmil3	4.33641333575186e-109	0.187218	0.326	0.304	1.1621587739815e-104	1	mm10---Carmil3
mm10---Abcb7	1.77511286051126e-108	0.167287	0.349	0.349	4.75730246617018e-104	1	mm10---Abcb7
mm10---Arpp19	2.08551595174022e-108	0.107579	0.243	0.261	5.58918275066378e-104	1	mm10---Arpp19
mm10---Ptprf	2.39749510978737e-108	0.2709	0.387	0.307	6.42528689423016e-104	1	mm10---Ptprf
mm10---Cfap54	3.84529212262101e-108	0.286451	0.26	0.171	1.03053828886243e-103	1	mm10---Cfap54
mm10---Sec11c	5.06785320058538e-108	0.123327	0.291	0.318	1.35818465775688e-103	1	mm10---Sec11c
mm10---Gm48765	5.6712173361792e-108	0.188948	0.256	0.235	1.51988624609603e-103	1	mm10---Gm48765
mm10---Prkar2b	1.33812498141289e-107	0.214059	0.327	0.289	3.58617495018654e-103	1	mm10---Prkar2b
mm10---Ssh2	2.17029257225433e-107	0.154358	0.865	0.914	5.81638409364161e-103	1	mm10---Ssh2
mm10---Gm13830	2.39366837934868e-107	0.21281	0.252	0.209	6.41503125665446e-103	1	mm10---Gm13830
mm10---Nr6a1	3.170147862397e-107	0.10659	0.788	0.865	8.49599627122397e-103	1	mm10---Nr6a1
mm10---Grem2	7.0257256432281e-107	0.104121	0.256	0.288	1.88289447238513e-102	1	mm10---Grem2
mm10---Eapp	7.86770323438717e-107	0.100527	0.234	0.258	2.10854446681576e-102	1	mm10---Eapp
mm10---Rassf8	1.7233195772849e-106	0.226651	0.383	0.353	4.61849646712352e-102	1	mm10---Rassf8
mm10---March1	2.49900029023972e-106	0.347781	0.745	0.579	6.69732077784246e-102	1	mm10---March1
mm10---Atp6v0a1	4.30383458102342e-106	0.150186	0.894	0.943	1.15342766771428e-101	1	mm10---Atp6v0a1
mm10---Pde1a	6.00680834229717e-106	0.321517	0.339	0.186	1.60982463573564e-101	1	mm10---Pde1a
mm10---Mios	1.88900118036685e-105	0.138256	0.262	0.261	5.06252316338315e-101	1	mm10---Mios
mm10---Insyn2b	2.03546711438471e-105	0.314684	0.356	0.219	5.45505186655102e-101	1	mm10---Insyn2b
mm10---Gm13402	2.91750065908954e-105	0.221716	0.258	0.206	7.81890176635997e-101	1	mm10---Gm13402
mm10---Smarca1	4.86112560302683e-105	0.115929	0.348	0.385	1.30278166161119e-100	1	mm10---Smarca1
mm10---Cplx2	5.23044910133803e-105	0.315424	0.343	0.196	1.40176035915859e-100	1	mm10---Cplx2
mm10---Crocc	2.17366639104275e-104	0.146858	0.254	0.246	5.82542592799456e-100	1	mm10---Crocc
mm10---Cenpp	3.37890696724753e-104	0.170446	0.282	0.28	9.05547067222338e-100	1	mm10---Cenpp
mm10---Slc39a11	4.28500746036033e-104	0.184102	0.278	0.26	1.14838199937657e-99	1	mm10---Slc39a11
mm10---Sp1	9.71339790167075e-104	0.101324	0.26	0.289	2.60319063764776e-99	1	mm10---Sp1
mm10---4430402I18Rik	9.86631700646159e-104	0.100073	0.426	0.479	2.64417295773171e-99	1	mm10---4430402I18Rik
mm10---Itgb3bp	1.43080251077799e-103	0.2317	0.329	0.281	3.83455072888501e-99	1	mm10---Itgb3bp
mm10---1700024B18Rik	2.17529199207255e-103	0.267557	0.383	0.317	5.82978253875444e-99	1	mm10---1700024B18Rik
mm10---Erlin1	2.80022455088221e-103	0.124682	0.243	0.25	7.50460179636433e-99	1	mm10---Erlin1
mm10---Dpp10	4.77745672345084e-103	0.454105	0.924	0.952	1.28035840188482e-98	1	mm10---Dpp10
mm10---Ostc	5.14904638617118e-103	0.125976	0.235	0.25	1.37994443149388e-98	1	mm10---Ostc
mm10---9530036O11Rik	6.64146640972789e-103	0.198265	0.256	0.235	1.77991299780708e-98	1	mm10---9530036O11Rik
mm10---Ppp1r16b	2.33632777453935e-102	0.272478	0.38	0.226	6.26135843576546e-98	1	mm10---Ppp1r16b
mm10---Gm19522	7.64660013599049e-102	0.296999	0.264	0.16	2.04928883644545e-97	1	mm10---Gm19522
mm10---Slc39a10	7.67886505585779e-102	0.184576	0.323	0.319	2.05793583496989e-97	1	mm10---Slc39a10
mm10---Dock10	1.23870683880365e-101	0.157729	0.554	0.381	3.31973432799378e-97	1	mm10---Dock10
mm10---Zfp697	1.67223164829673e-101	0.11124	0.281	0.307	4.48158081743525e-97	1	mm10---Zfp697
mm10---Dok5	1.6943627428615e-101	0.161944	0.31	0.308	4.54089215086881e-97	1	mm10---Dok5
mm10---Pced1b	1.880561507996e-101	0.191319	0.5	0.502	5.03990484142929e-97	1	mm10---Pced1b
mm10---Lgi1	2.19149441101504e-101	0.196258	0.457	0.454	5.87320502152032e-97	1	mm10---Lgi1
mm10---4921511C10Rik	2.54317684521575e-101	0.175471	0.313	0.303	6.81571394517821e-97	1	mm10---4921511C10Rik
mm10---Adamts16	3.00312002364724e-101	0.156435	0.257	0.253	8.04836166337461e-97	1	mm10---Adamts16
mm10---Gm13483	5.33243816351841e-101	0.108058	0.259	0.291	1.42909342782293e-96	1	mm10---Gm13483
mm10---Tmem132a	9.08667924554048e-101	0.25203	0.325	0.249	2.43523003780485e-96	1	mm10---Tmem132a
mm10---Palm	1.81066413455129e-100	0.132383	0.35	0.375	4.85257988059746e-96	1	mm10---Palm
mm10---Akap12	4.2304350132814e-100	0.129245	0.285	0.301	1.13375658355942e-95	1	mm10---Akap12
mm10---Mkx	5.12082744308461e-100	0.237814	0.34	0.304	1.37238175474667e-95	1	mm10---Mkx
mm10---Tcte2	7.06310916254234e-100	0.260701	0.25	0.142	1.89291325556135e-95	1	mm10---Tcte2
mm10---Akap9	1.01407763383467e-99	0.115232	0.814	0.878	2.7177280586769e-95	1	mm10---Akap9
mm10---Izumo4	1.38315813064626e-99	0.249093	0.329	0.273	3.70686379013199e-95	1	mm10---Izumo4
mm10---Gm46367	2.06132003759266e-99	0.153681	0.348	0.354	5.52433770074833e-95	1	mm10---Gm46367
mm10---Plppr1	2.79110032685527e-99	0.220593	0.515	0.519	7.48014887597212e-95	1	mm10---Plppr1
mm10---Scd2	4.59090264864645e-99	0.219262	0.504	0.477	1.23036190983725e-94	1	mm10---Scd2
mm10---A330040F15Rik	7.95442162941414e-99	0.194158	0.279	0.255	2.13178499668299e-94	1	mm10---A330040F15Rik
mm10---Gm45341	1.33786228108888e-98	0.38803	0.351	0.23	3.5854709133182e-94	1	mm10---Gm45341
mm10---Dcx	2.03668097840817e-98	0.218233	0.391	0.349	5.4583050221339e-94	1	mm10---Dcx
mm10---Macrod2os1	2.04411124009957e-98	0.111865	0.339	0.373	5.47821812346685e-94	1	mm10---Macrod2os1
mm10---Shisa4	3.38087223517557e-98	0.155251	0.292	0.29	9.06073759027053e-94	1	mm10---Shisa4
mm10---Zranb2	4.06325581894546e-98	0.201403	0.956	0.98	1.08895255947738e-93	1	mm10---Zranb2
mm10---Pgap2	2.32406224203976e-97	0.176243	0.284	0.269	6.22848680866657e-93	1	mm10---Pgap2
mm10---Vmp1	4.87208704336581e-97	0.103234	0.753	0.818	1.30571932762204e-92	1	mm10---Vmp1
mm10---Tmem50a	5.28099214157197e-97	0.209867	0.285	0.248	1.41530589394129e-92	1	mm10---Tmem50a
mm10---Cdh13	2.70869821082644e-96	0.280436	0.693	0.749	7.25931120501486e-92	1	mm10---Cdh13
mm10---Zfp560	3.27379736386279e-96	0.18728	0.253	0.211	8.77377693515227e-92	1	mm10---Zfp560
mm10---Mpp2	4.8732203212913e-96	0.161099	0.258	0.238	1.30602304610607e-91	1	mm10---Mpp2
mm10---Dhtkd1	1.68174311415815e-94	0.107463	0.239	0.257	4.50707154594384e-90	1	mm10---Dhtkd1
mm10---Syt16	1.36734219464755e-93	0.323306	0.605	0.518	3.66447708165544e-89	1	mm10---Syt16
mm10---Angpt2	2.39096624670557e-93	0.103034	0.232	0.252	6.40778954117093e-89	1	mm10---Angpt2
mm10---Grip2	2.73801204424691e-93	0.158586	0.252	0.23	7.33787227858172e-89	1	mm10---Grip2
mm10---4930587E11Rik	8.21014052329264e-93	0.237586	0.292	0.269	2.20031766024243e-88	1	mm10---4930587E11Rik
mm10---Gucy1b1	9.08052774812421e-93	0.141562	0.346	0.357	2.43358143649729e-88	1	mm10---Gucy1b1
mm10---Gm47423	5.72634805953068e-92	0.109499	0.24	0.265	1.53466127995422e-87	1	mm10---Gm47423
mm10---Olfm2	1.1435714668592e-91	0.289629	0.536	0.39	3.06477153118267e-87	1	mm10---Olfm2
mm10---Glra1	1.45435253649554e-91	0.286583	0.356	0.269	3.89766479780804e-87	1	mm10---Glra1
mm10---Timp3	1.96344297933975e-91	0.194315	0.441	0.429	5.26202718463053e-87	1	mm10---Timp3
mm10---Hmgcs1	1.99504101434809e-91	0.11023	0.256	0.278	5.34670991845288e-87	1	mm10---Hmgcs1
mm10---4930532I03Rik	1.07126688646984e-90	0.21619	0.272	0.212	2.87099525573916e-86	1	mm10---4930532I03Rik
mm10---Vsnl1	1.76123783192547e-90	0.225262	0.853	0.865	4.72011738956026e-86	1	mm10---Vsnl1
mm10---A730081D07Rik	3.42304607732907e-90	0.124248	0.245	0.257	9.17376348724192e-86	1	mm10---A730081D07Rik
mm10---Sorl1	6.76677929809106e-90	0.243264	0.449	0.397	1.8134968518884e-85	1	mm10---Sorl1
mm10---Prkn	1.19924744980588e-89	0.240217	0.957	0.974	3.21398316547977e-85	1	mm10---Prkn
mm10---Msh3	1.00506258772591e-88	0.160718	0.409	0.422	2.69356773510545e-84	1	mm10---Msh3
mm10---Prr16	2.29677630693487e-88	0.399356	0.564	0.433	6.15536050258545e-84	1	mm10---Prr16
mm10---Cdr1os	3.16198668031503e-88	0.213947	0.958	0.968	8.47412430324427e-84	1	mm10---Cdr1os
mm10---Rtl4	1.00934049565862e-87	0.381288	0.68	0.574	2.70503252836511e-83	1	mm10---Rtl4
mm10---N4bp2	1.19559582116678e-87	0.229965	0.263	0.19	3.20419680072698e-83	1	mm10---N4bp2
mm10---Gm15680	9.48427250539853e-87	0.321924	0.439	0.373	2.54178503144681e-82	1	mm10---Gm15680
mm10---Abca8b	3.78924527029559e-86	0.149806	0.26	0.253	1.01551773243922e-81	1	mm10---Abca8b
mm10---Klhl13	4.26841181882462e-86	0.113317	0.254	0.278	1.143934367445e-81	1	mm10---Klhl13
mm10---Rcn2	8.47739882887436e-85	0.233601	0.512	0.452	2.27194288613833e-80	1	mm10---Rcn2
mm10---Lrmda	8.87880022770409e-85	0.34388	0.275	0.174	2.3795184610247e-80	1	mm10---Lrmda
mm10---mt-Co3	7.79879154329254e-84	0.379861	0.479	0.494	2.0900761336024e-79	1	mm10---mt-Co3
mm10---Fdft1	1.31800923698035e-83	0.166471	0.294	0.274	3.53226475510733e-79	1	mm10---Fdft1
mm10---Zmynd8	1.37048016537746e-83	0.126589	0.888	0.937	3.6728868432116e-79	1	mm10---Zmynd8
mm10---Glra2	1.81823032216215e-83	0.217402	0.299	0.275	4.87285726339456e-79	1	mm10---Glra2
mm10---Ccdc85a	2.98771540231788e-83	0.145826	0.852	0.892	8.00707727821193e-79	1	mm10---Ccdc85a
mm10---Mir670hg	4.85970257154933e-83	0.245136	0.366	0.338	1.30240028917522e-78	1	mm10---Mir670hg
mm10---Arl15	2.35467027668488e-82	0.13436	0.737	0.791	6.31051634151548e-78	1	mm10---Arl15
mm10---Heatr5a	5.53636974833482e-82	0.169749	0.264	0.236	1.48374709255373e-77	1	mm10---Heatr5a
mm10---Mboat2	1.79731190782047e-81	0.151643	0.44	0.45	4.81679591295887e-77	1	mm10---Mboat2
mm10---Tjp1	2.82537556094536e-81	0.128439	0.894	0.942	7.57200650333356e-77	1	mm10---Tjp1
mm10---Vgll4	5.5975500554077e-81	0.204076	0.336	0.291	1.50014341484926e-76	1	mm10---Vgll4
mm10---Sptb	1.22839766537273e-80	0.184722	0.429	0.406	3.29210574319893e-76	1	mm10---Sptb
mm10---Abr	1.4944378666429e-80	0.135579	0.806	0.851	4.00509348260296e-76	1	mm10---Abr
mm10---Sema6d	3.54851831512371e-80	0.215119	0.649	0.702	9.51002908453155e-76	1	mm10---Sema6d
mm10---Pou2f2	9.19693333656912e-80	0.201244	0.289	0.265	2.46477813420052e-75	1	mm10---Pou2f2
mm10---Grik3	2.30323098504549e-79	0.292567	0.389	0.335	6.17265903992192e-75	1	mm10---Grik3
mm10---Gria1	3.14475572281089e-79	0.224039	0.879	0.851	8.42794533713318e-75	1	mm10---Gria1
mm10---Lsamp	5.46133990153608e-79	0.300826	0.996	0.988	1.46363909361167e-74	1	mm10---Lsamp
mm10---Agpat4	6.89913406553597e-79	0.134932	0.325	0.339	1.84896792956364e-74	1	mm10---Agpat4
mm10---Tead1	9.32472057951474e-79	0.195477	0.274	0.242	2.49902511530995e-74	1	mm10---Tead1
mm10---Gprc5b	3.45513623538045e-77	0.114306	0.246	0.252	9.2597651108196e-73	1	mm10---Gprc5b
mm10---Vwc2l	2.35494893956395e-76	0.123434	0.498	0.553	6.31126315803138e-72	1	mm10---Vwc2l
mm10---Dpyd	8.51551555438148e-75	0.302702	0.401	0.348	2.28215816857424e-70	1	mm10---Dpyd
mm10---Sntg2	2.07948898636822e-74	0.31265	0.302	0.192	5.57303048346683e-70	1	mm10---Sntg2
mm10---Tmcc1	1.43663614006366e-73	0.126184	0.893	0.935	3.8501848553706e-69	1	mm10---Tmcc1
[truncated: 12,589 more rows]

## Sheet: TH EN DEGs WT v KO
	p_val	avg_log2FC	pct.1	pct.2	p_val_adj
Frmd4a	0	-0.59032	0.96	0.993	0
Gm42418	0	0.558048	0.992	0.975	0
Atp6v0c	1.10293985689897e-170	0.585291	0.902	0.818	2.95587881648925e-166
Scg5	2.89489684026736e-156	0.491802	0.94	0.9	7.75832353191653e-152
Gm47283	2.28286729445837e-130	-0.980397	0.28	0.449	6.11808434914842e-126
Itm2b	2.1251929630512e-128	0.515453	0.894	0.83	5.69551714097722e-124
Mri1	1.10170195005568e-122	-1.02205	0.188	0.354	2.95256122614922e-118
Podxl2	1.90978751726197e-113	-0.9622	0.208	0.37	5.11823054626208e-109
1700080N15Rik	1.12143619562848e-110	-1.57857	0.057	0.168	3.00544900428432e-106
Bsg	2.63975481182678e-106	0.497562	0.797	0.697	7.07454289569576e-102
Rsrp1	3.38361767813897e-103	-0.331575	0.824	0.919	9.06809537741243e-99
Gm10862	6.40281876198142e-98	-1.21804	0.099	0.221	1.71595542821102e-93
Slc17a6	5.57598393055033e-83	0.367588	0.831	0.777	1.49436369338749e-78
Serinc1	2.15198814560259e-82	0.443991	0.755	0.659	5.76732823021493e-78
Rtn1	3.72006326750624e-78	0.405295	0.967	0.96	9.96976955691672e-74
Arl6ip1	2.24944323376527e-74	0.465285	0.672	0.55	6.02850786649092e-70
Gabbr1	2.60107180267762e-74	0.40078	0.821	0.771	6.97087243117601e-70
Caly	4.30388970018295e-69	0.521309	0.65	0.55	1.15344243964903e-64
Tecr	5.6854484411244e-69	0.344451	0.921	0.914	1.52370018222134e-64
Tsnax	1.1868668189907e-67	-0.602121	0.331	0.465	3.18080307489508e-63
Hspa8	1.46055153603694e-66	0.51773	0.587	0.483	3.91427811657899e-62
Gm38085	2.00964835236529e-66	-1.059	0.084	0.177	5.38585758433898e-62
Syp	2.91962538462359e-66	0.347793	0.81	0.762	7.82459603079121e-62
Srrm2	3.75741295195114e-66	-0.185371	0.984	0.992	1.0069866711229e-61
Thy1	7.00352524873638e-65	0.441129	0.654	0.584	1.87694476666135e-60
mt-Co3	8.43926347229942e-64	0.816486	0.533	0.433	2.26172261057625e-59
Atp6ap2	2.40494982674963e-62	0.392119	0.707	0.642	6.44526553568901e-58
Syt4	4.28590755281693e-61	0.523714	0.574	0.469	1.14862322415494e-56
Ttc14	8.70999779409682e-60	-0.271966	0.747	0.846	2.33427940881795e-55
Faim2	8.26761097402426e-59	0.392066	0.728	0.665	2.2157197410385e-54
Cst3	1.84291273918774e-57	0.53201	0.555	0.452	4.93900614102314e-53
Cd81	3.19928817551925e-57	0.456471	0.651	0.59	8.57409231039158e-53
Ctsb	6.57389894863298e-57	0.507264	0.584	0.512	1.76180491823364e-52
mt-Atp6	2.80169415668528e-56	0.916144	0.394	0.301	7.50854033991656e-52
mt-Co2	8.21868690130599e-55	0.814194	0.422	0.317	2.20260808955001e-50
AC149090.1	1.01374295190522e-54	0.267027	0.957	0.956	2.71683111110598e-50
Gm37814	1.65001937231007e-54	-1.22912	0.049	0.117	4.422051917791e-50
Syt11	2.0404876692079e-54	0.304284	0.826	0.785	5.46850695347718e-50
Hsp90b1	2.34561573038447e-54	0.456304	0.607	0.516	6.28625015743037e-50
Rab24	4.03482294155512e-54	-0.844296	0.114	0.206	1.08133254833677e-49
Snhg11	4.55738890806383e-52	0.137337	0.999	0.999	1.22138022736111e-47
Gm13187	5.46576681851443e-52	-0.908954	0.087	0.168	1.46482550736187e-47
Hspa5	1.22988445662329e-51	0.459142	0.582	0.488	3.29609034375043e-47
Cck	2.5506046135685e-51	0.72631	0.346	0.262	6.83562036436359e-47
Gmcl1	3.56890627880052e-51	-0.366874	0.545	0.659	9.56466882718538e-47
mt-Cytb	6.40692941640218e-51	0.862984	0.383	0.287	1.71705708359578e-46
Pcsk2	7.02155579427429e-51	0.309422	0.89	0.865	1.88177695286551e-46
Asna1	8.17726725115707e-51	1.01683	0.188	0.109	2.19150762331009e-46
Hrh2	1.25567194505175e-50	-0.699067	0.216	0.32	3.36520081273869e-46
Itm2c	4.44334888298484e-50	0.545978	0.492	0.426	1.19081750063994e-45
Atp1b1	1.46417090497381e-49	0.226849	0.933	0.919	3.9239780253298e-45
A930015D03Rik	2.45950357887112e-49	-0.33869	0.413	0.532	6.5914695913746e-45
Gm49980	3.84229924120896e-49	-0.841329	0.061	0.126	1.029736196644e-44
Kif21a	3.64264600401894e-48	-0.222627	0.892	0.928	9.76229129077076e-44
Rabac1	4.7811094657297e-48	0.450097	0.566	0.47	1.28133733681556e-43
Pgrmc1	1.01299769131697e-47	0.535371	0.433	0.33	2.71483381272947e-43
Gm36988	1.79217162134767e-47	-0.752611	0.105	0.186	4.80301994521177e-43
Gm38348	2.54999688324129e-46	-1.26686	0.043	0.103	6.83399164708665e-42
Pkn2	3.50513297713533e-46	-0.379713	0.497	0.607	9.39375637872269e-42
Rab11fip2	3.75849815331399e-46	-0.529919	0.292	0.402	1.00727750508815e-41
Sv2a	4.61134761843942e-46	0.302842	0.778	0.743	1.23584116174176e-41
Tmem145	5.32688094148965e-46	-0.45047	0.348	0.462	1.42760409231923e-41
mt-Nd1	6.28873314458638e-46	0.915369	0.312	0.232	1.68538048274915e-41
Zfp808	9.32338909763916e-46	-0.480695	0.161	0.248	2.49866827816729e-41
Megf9	1.69498890046226e-45	0.265003	0.601	0.601	4.54257025323885e-41
Stmn3	2.47365161876583e-44	0.279631	0.833	0.802	6.62938633829241e-40
Rnasek	3.72130399177856e-44	0.528001	0.458	0.365	9.97309469796653e-40
Chga	4.39173413849653e-44	0.345236	0.685	0.627	1.17698474911707e-39
mt-Co1	7.94690521973197e-43	0.671495	0.422	0.355	2.12977059888817e-38
Resp18	2.98006499554346e-42	0.399542	0.682	0.649	7.98657418805646e-38
Psap	9.76549020447412e-42	0.288987	0.811	0.797	2.61715137479906e-37
Gabra4	1.51803926711956e-41	0.348183	0.519	0.511	4.06834523588042e-37
Gapdh	1.66862678201347e-41	0.480158	0.445	0.374	4.47191977579609e-37
Hook2	2.84713818557952e-41	-0.395571	0.361	0.469	7.63033033735312e-37
Atp2a2	6.9403970159112e-41	0.271203	0.792	0.764	1.8600264002642e-36
Cacna1a	1.25386334137752e-40	-0.132908	0.964	0.989	3.36035375489174e-36
Fbxo10	1.61097865921614e-40	-0.362775	0.37	0.477	4.31742280669925e-36
mt-Nd4	4.25506635524632e-40	0.821279	0.298	0.218	1.14035778320601e-35
Ssbp4	6.35915917168576e-39	-0.354626	0.231	0.32	1.70425465801179e-34
Cep78	1.45509658301974e-38	-0.436553	0.337	0.439	3.89965884249291e-34
Gnpat	1.46305911918688e-38	-0.423772	0.319	0.42	3.92099843942083e-34
Gm3448	2.7609352603522e-38	0.61588	0.3	0.225	7.39930649774389e-34
Cpe	3.26277267076861e-38	0.211501	0.859	0.85	8.74423075765988e-34
Cd47	3.53257889527619e-38	0.217128	0.728	0.715	9.46731143934018e-34
Mink1	1.49745542805695e-37	-0.367746	0.397	0.5	4.01318054719262e-33
Spock2	2.91035084667192e-37	0.225987	0.83	0.798	7.79974026908073e-33
Zfp423	2.93387750393796e-37	0.251095	0.684	0.689	7.86279171055374e-33
Ubb	4.75545602056144e-37	0.452347	0.49	0.415	1.27446221351047e-32
Calm1	1.04233742380944e-36	0.254568	0.696	0.667	2.7934642958093e-32
Arid5b	3.63597454108715e-36	0.243774	0.808	0.786	9.74441177011357e-32
Ccdc141	4.11915879982392e-36	0.939957	0.187	0.139	1.10393455835281e-31
Pcgf6	5.34390635830161e-36	-0.451873	0.261	0.356	1.43216690402483e-31
Hsp90ab1	1.15251262214787e-35	0.312062	0.664	0.612	3.0887338273563e-31
Pcsk1n	1.35122659559135e-35	-0.3344	0.611	0.704	3.62128727618482e-31
Prnp	1.5247634701796e-35	0.387696	0.545	0.486	4.08636610008133e-31
Cpne4	1.68919415019901e-35	0.411584	0.644	0.614	4.52704032253335e-31
Dab2	2.68848411207614e-35	0.89508	0.162	0.124	7.20513742036406e-31
Snx32	2.85489374303691e-35	-0.307873	0.532	0.627	7.65111523133893e-31
Mid1	2.88064629934016e-35	-0.459123	0.098	0.158	7.72013208223163e-31
Atp5a1	4.17693312103135e-35	-0.337231	0.37	0.47	1.1194180764364e-30
Dab1	6.73618460164108e-35	-0.113915	0.68	0.766	1.80529747323981e-30
Clu	7.66102170861342e-35	0.423022	0.349	0.331	2.0531538179084e-30
Aplp2	1.43831365045792e-34	0.218599	0.814	0.795	3.85468058322724e-30
Pip4p1	1.72624582520125e-34	-0.550426	0.174	0.256	4.62633881153934e-30
Scg2	1.95154652923905e-34	0.335333	0.685	0.602	5.23014469836065e-30
Kcnt1	2.01536499010398e-34	-0.358853	0.459	0.556	5.40117817347866e-30
Oser1	2.54634022658307e-34	-0.73791	0.088	0.152	6.82419180724262e-30
mt-Nd2	2.6030488998409e-34	0.820856	0.26	0.19	6.97617105157362e-30
Adgrl1	3.1162451537695e-34	0.259428	0.663	0.634	8.35153701210226e-30
Atxn2l	3.12595807674719e-34	-0.329407	0.415	0.514	8.37756764568247e-30
Canx	6.80180420505449e-34	0.298825	0.68	0.63	1.8228835269546e-29
Tmem59l	8.130119002535e-34	0.270065	0.611	0.614	2.17887189267938e-29
Abhd12b	8.14104268108695e-34	0.82833	0.221	0.159	2.1817994385313e-29
Dhtkd1	1.02927480595777e-33	-0.400039	0.212	0.295	2.75845647996681e-29
Tmem30a	3.8009724677212e-33	0.39283	0.51	0.435	1.01866062134928e-28
0610030E20Rik	5.33527571438055e-33	-0.467166	0.195	0.277	1.42985389145399e-28
Nwd2	8.36254338368231e-33	1.29084	0.251	0.276	2.24116162682686e-28
Abca6	8.41503435755923e-33	1.04552	0.12	0.066	2.25522920782587e-28
Nrsn2	1.07107531032506e-32	0.500968	0.377	0.303	2.87048183167117e-28
Tmem163	1.82589054648218e-32	0.263477	0.797	0.748	4.89338666457225e-28
Clstn1	2.47122809052977e-32	0.236033	0.788	0.761	6.62289128261977e-28
4930509H03Rik	2.72203748629643e-32	-0.518902	0.135	0.205	7.29506046327444e-28
Ptgds	4.9320860247134e-32	0.468471	0.56	0.532	1.32179905462319e-27
Cntnap5a	5.33335155030217e-32	-0.192765	0.782	0.854	1.42933821548098e-27
Tm2d3	1.26350542142535e-31	0.475613	0.368	0.288	3.38619452941993e-27
Tspan13	3.48306045180847e-31	0.356111	0.532	0.496	9.3346020108467e-27
Lrpap1	5.7647324553381e-31	0.394517	0.504	0.45	1.54494829803061e-26
Gm5820	7.97663622391074e-31	-0.51908	0.243	0.324	2.13773850800808e-26
Ddx47	9.23035780751986e-31	-0.318529	0.192	0.263	2.47373589241532e-26
Speg	1.63682095753784e-30	-0.274593	0.291	0.374	4.3866801662014e-26
Sgk1	2.42951195570656e-30	0.225087	0.623	0.615	6.51109204129357e-26
Arnt2	2.92689588116003e-30	-0.226849	0.439	0.53	7.84408096150888e-26
Gm1043	3.74754080484771e-30	0.242207	0.649	0.627	1.00434093569919e-25
Ctsl	3.82871476985981e-30	0.451571	0.408	0.339	1.02609555832243e-25
Reep5	9.32350588985034e-30	0.306204	0.555	0.516	2.49869957847989e-25
Gm2762	1.25329809710952e-29	0.788423	0.162	0.102	3.35883890025352e-25
Shisal1	1.30199014005389e-29	0.34009	0.434	0.405	3.48933357534443e-25
Gm47469	2.03543237279963e-29	-0.823019	0.063	0.115	5.45495875910301e-25
Map7d1	2.14479474739612e-29	-0.358339	0.34	0.43	5.7480499230216e-25
Pcp4	3.44175291139854e-29	0.402847	0.491	0.445	9.22389780254809e-25
Carmil3	9.04036643886147e-29	-0.346013	0.275	0.359	2.42281820561487e-24
Rnf152	1.26881088903113e-28	-0.26266	0.688	0.729	3.40041318260343e-24
4833420G17Rik	2.70071421780105e-28	-0.233944	0.497	0.587	7.23791410370682e-24
Hspa4	3.71976983199167e-28	-0.240683	0.478	0.568	9.96898314973768e-24
Luc7l3	4.21979801875121e-28	0.191497	0.86	0.844	1.13090586902532e-23
Pdia3	4.3119856743703e-28	0.306212	0.605	0.55	1.15561216073124e-23
Dcun1d5	4.38970842416448e-28	-0.330254	0.331	0.418	1.17644185767608e-23
Tmem131	6.1336817794992e-28	0.214642	0.604	0.6	1.64382671690579e-23
Klhdc10	7.23129460138049e-28	-0.215739	0.703	0.777	1.93798695316997e-23
Arhgap26	1.20247369415266e-27	-0.2371	0.665	0.739	3.22262950032913e-23
Slc27a1	1.42146631175716e-27	-0.306578	0.219	0.291	3.80952971550919e-23
Tmx4	2.08221737160361e-27	0.257009	0.723	0.692	5.58034255589768e-23
Nsg1	4.21662993914862e-27	0.325561	0.553	0.5	1.13005682369183e-22
9330185C12Rik	4.76010258227064e-27	0.695816	0.205	0.156	1.27570749204853e-22
Pgbd5	5.33357098273521e-27	0.260512	0.453	0.441	1.42939702337304e-22
Gm15614	5.94999361626493e-27	-0.326637	0.303	0.386	1.594598289159e-22
Sdk2	6.20566307036953e-27	0.25719	0.599	0.574	1.66311770285903e-22
Eml1	6.35617028468828e-27	0.22097	0.583	0.586	1.70345363629646e-22
Scube1	8.37318752579335e-27	0.91021	0.111	0.118	2.24401425691262e-22
Dad1	1.07511327973789e-26	0.514348	0.315	0.247	2.88130358969755e-22
Snx30	1.23925646339602e-26	-0.279968	0.383	0.469	3.32120732190133e-22
Ndufc2	1.26534362408164e-26	0.495054	0.302	0.251	3.39112091253881e-22
Igsf8	1.35019673855653e-26	0.321337	0.55	0.509	3.61852725933151e-22
Bicc1	1.40404977621496e-26	0.351543	0.468	0.433	3.7628534002561e-22
Fgf1	2.41408191793506e-26	-0.420338	0.337	0.415	6.46973954006597e-22
Mpp6	4.25828448568404e-26	0.18797	0.589	0.6	1.14122024216332e-21
Nrg1	4.49643425130546e-26	-0.193791	0.854	0.895	1.20504437934986e-21
Osbpl3	4.53262160157432e-26	0.346124	0.479	0.446	1.21474258922192e-21
Chd3	6.05641542407781e-26	-0.306765	0.367	0.452	1.62311933365285e-21
Mb21d2	7.5305829754074e-26	0.273372	0.47	0.458	2.01819623740918e-21
Npdc1	8.09575863704281e-26	0.306788	0.514	0.483	2.16966331472747e-21
Kcnq1ot1	1.03473831901928e-25	0.145257	0.954	0.948	2.77309869497167e-21
Rab6b	1.08789358102515e-25	0.162114	0.673	0.674	2.91555479714741e-21
Trhde	1.21854421673788e-25	-0.41073	0.334	0.415	3.26569850085753e-21
Tsc1	1.3310719859023e-25	-0.224295	0.609	0.689	3.56727292221818e-21
Schip1	1.41191666220862e-25	-0.228223	0.866	0.903	3.78393665471909e-21
Srrm4	1.60228776750187e-25	0.213336	0.719	0.727	4.29413121690502e-21
Grina	1.60870928181507e-25	0.244267	0.69	0.672	4.31134087526438e-21
Cpne7	1.90694477159982e-25	-0.397607	0.341	0.423	5.11061198788753e-21
Dbn1	2.23888881283926e-25	-0.248084	0.492	0.577	6.00022201840922e-21
Arsb	2.39019469057855e-25	-0.257934	0.368	0.451	6.40572177075051e-21
Pitpnm3	2.47084396740583e-25	-0.201816	0.377	0.456	6.62186183264762e-21
Micu2	2.74975740746762e-25	-0.281449	0.449	0.533	7.36934985201321e-21
Eno2	2.78212461536527e-25	-0.260825	0.516	0.599	7.45609396917892e-21
Scrt1	3.16272865353419e-25	-0.676051	0.057	0.1	8.47611279147163e-21
Zc3h6	3.18168083659147e-25	-0.29644	0.377	0.461	8.52690464206514e-21
Gm45904	4.22659813179683e-25	-0.362239	0.137	0.194	1.13272829932155e-20
Slc41a2	5.15357354775283e-25	0.191497	0.466	0.475	1.38115771079776e-20
Tmem59	6.16117745113578e-25	0.197957	0.645	0.646	1.65119555690439e-20
Vegfa	6.16440689059337e-25	-0.588827	0.117	0.176	1.65206104667902e-20
Epha4	7.55544075542264e-25	0.203601	0.705	0.699	2.02485812245327e-20
Ring1	9.10522802264445e-25	-0.318778	0.3	0.379	2.44020111006871e-20
Phldb2	1.10101771425817e-24	-0.246997	0.122	0.17	2.9507274742119e-20
Mycbp	1.5386037043202e-24	-0.336401	0.348	0.429	4.12345792757812e-20
Actr1b	1.55178770039883e-24	-0.247187	0.532	0.614	4.15879103706887e-20
Habp4	1.84616336323952e-24	-0.308014	0.299	0.378	4.94771781348192e-20
Calr	2.17121914869136e-24	0.329716	0.479	0.412	5.81886731849284e-20
Dnttip1	2.82144042690144e-24	-0.377469	0.292	0.37	7.56146034409585e-20
Gm48250	3.60637119574775e-24	-0.629341	0.058	0.1	9.66507480460397e-20
Clcn2	3.77925717783449e-24	-0.379098	0.197	0.265	1.01284092365964e-19
Sema6a	4.10927050436781e-24	0.267547	0.628	0.577	1.10128449517057e-19
Map2k2	5.60834382436446e-24	-0.249825	0.422	0.505	1.50303614492967e-19
Pitpnc1	5.67553264972175e-24	0.305763	0.781	0.785	1.52104275012543e-19
Sparcl1	8.92903962948381e-24	0.315792	0.525	0.494	2.39298262070166e-19
Srsf1	1.16781083769787e-23	-0.288593	0.336	0.415	3.12973304503028e-19
Gm9856	1.32123645880422e-23	-0.594542	0.117	0.175	3.54091370959532e-19
Trf	1.61347300898629e-23	-0.28583	0.151	0.208	4.32410766408326e-19
Snap25	1.73637756285292e-23	0.145033	0.97	0.973	4.65349186844583e-19
Arhgef25	1.97432740069951e-23	-0.290482	0.278	0.352	5.29119743387469e-19
6330576A10Rik	2.03724633787822e-23	-0.544982	0.124	0.183	5.45982018551363e-19
Capn11	2.79903838625294e-23	-0.695727	0.066	0.112	7.50142287515788e-19
Tmem147	3.60237473375301e-23	0.457552	0.315	0.253	9.65436428645806e-19
Atp6ap1	3.6087391578758e-23	0.31451	0.514	0.472	9.67142094310716e-19
Cd2ap	4.9204978681907e-23	-0.265612	0.483	0.562	1.31869342867511e-18
Sympk	5.20135276521715e-23	-0.260894	0.468	0.549	1.3939625410782e-18
Map11	5.57028985383906e-23	-0.478998	0.127	0.185	1.49283768082887e-18
Nwd1	5.72078881868428e-23	-0.646612	0.093	0.145	1.53317140340739e-18
Tmem132d	5.81079656194732e-23	-0.374808	0.392	0.462	1.55729347860188e-18
Syt9	7.33089134790524e-23	0.420716	0.491	0.482	1.9646788812386e-18
Gm10125	9.72670034829184e-23	-0.253784	0.567	0.638	2.60675569334221e-18
Mdh1	9.72864879184896e-23	0.230152	0.611	0.589	2.60727787621552e-18
Bcap31	1.75283678700456e-22	0.399756	0.377	0.321	4.69760258917221e-18
Gm16124	1.93935477913415e-22	-0.646538	0.097	0.149	5.19747080807953e-18
Ndufa4	2.07650055937176e-22	0.459737	0.297	0.254	5.56502149911631e-18
Tmbim6	2.12733563593412e-22	0.299147	0.486	0.446	5.70125950430344e-18
Arxes1	2.20745100139476e-22	0.608174	0.167	0.112	5.91596868373795e-18
Rfng	2.30894117620386e-22	-0.353607	0.143	0.198	6.18796235222634e-18
Arl2bp	3.54822683660428e-22	-0.372776	0.192	0.257	9.50924792209947e-18
Hsp90aa1	3.59929573815052e-22	0.281709	0.54	0.494	9.6461125782434e-18
Sbf1	3.82092796830192e-22	-0.276183	0.277	0.347	1.02400869550492e-17
9630014M24Rik	4.57170415447818e-22	-0.347513	0.419	0.489	1.22521671340015e-17
Chgb	5.63464855045219e-22	0.259616	0.562	0.494	1.51008581152119e-17
Hnrnpu	5.79604828935176e-22	-0.173846	0.771	0.822	1.55334094154627e-17
Shc3	5.85018647696476e-22	0.213442	0.603	0.598	1.56784997582656e-17
Ift57	7.2902900362978e-22	0.286239	0.389	0.374	1.95379772972781e-17
Ptpn1	7.86081275761408e-22	0.19067	0.603	0.587	2.10669781904057e-17
Ide	7.98981011807006e-22	-0.297251	0.37	0.447	2.14126911164278e-17
Cstf2	8.3444686224421e-22	-0.21747	0.416	0.493	2.23631759081448e-17
Golgb1	9.75442385188164e-22	-0.153256	0.642	0.716	2.61418559230428e-17
Epn1	1.06629493802081e-21	-0.317713	0.199	0.262	2.85767043389576e-17
Brsk2	1.53027391487789e-21	-0.267601	0.294	0.366	4.10113409187275e-17
Tac1	1.76704219377243e-21	1.04177	0.128	0.086	4.73567307931011e-17
Gas2l1	1.88088297173977e-21	-0.38209	0.152	0.21	5.04076636426258e-17
Chd5	2.07146778138209e-21	-0.240039	0.387	0.464	5.551533654104e-17
4933439C10Rik	2.23558619062802e-21	-0.486263	0.118	0.172	5.99137099088309e-17
Lrrfip2	2.30364200766507e-21	-0.220896	0.52	0.598	6.17376058054239e-17
Hsd17b12	3.0513685180312e-21	0.322527	0.435	0.394	8.17766762832361e-17
Tmcc3	3.11357277219566e-21	0.224784	0.615	0.613	8.34437502948437e-17
Tspan7	4.26449923373809e-21	0.185902	0.84	0.845	1.14288579464181e-16
Gabra1	4.34454577511145e-21	0.237243	0.67	0.64	1.16433826772987e-16
Slc25a16	4.63846977426171e-21	-0.407484	0.186	0.25	1.24310989950214e-16
Noc2l	4.99073721465337e-21	-0.286276	0.248	0.316	1.3375175735271e-16
Nsmaf	5.50145626309177e-21	-0.191233	0.47	0.547	1.47439027850859e-16
Cdh4	5.56270564664366e-21	0.31596	0.56	0.535	1.4908051133005e-16
Lhfp	5.88149526101144e-21	0.324527	0.515	0.491	1.57624072995107e-16
Slc5a6	6.07290031322181e-21	-0.257708	0.116	0.159	1.62753728394344e-16
Rnf10	6.94339585218181e-21	-0.295804	0.261	0.33	1.86083008838473e-16
Aars	7.18204833253442e-21	-0.303679	0.263	0.332	1.92478895311923e-16
4921524J17Rik	7.78555835529049e-21	0.499057	0.233	0.187	2.08652963921785e-16
Taf1d	8.54347384453251e-21	-0.202682	0.534	0.61	2.28965099033471e-16
Zic1	9.08995772340961e-21	0.524486	0.256	0.213	2.43610866987378e-16
Zswim8	9.6609434549586e-21	-0.290474	0.375	0.45	2.58913284592891e-16
Sdk1	9.79579665897177e-21	-0.246897	0.538	0.613	2.62527350460443e-16
Pot1b	9.90682793107715e-21	-0.576612	0.083	0.129	2.65502988552868e-16
Elmo1	1.30316562965296e-20	0.164381	0.852	0.846	3.49248388746994e-16
Map1lc3a	1.49331159226086e-20	-0.533709	0.088	0.135	4.0020750672591e-16
Sec62	1.70824817547496e-20	0.221333	0.677	0.65	4.57810511027288e-16
Sirt6	1.76153244225075e-20	-0.245015	0.195	0.25	4.720906945232e-16
Btbd9	1.85633460303324e-20	-0.16077	0.869	0.904	4.97497673612909e-16
Mtmr1	1.95911652549347e-20	-0.24509	0.368	0.442	5.25043228832251e-16
D630045J12Rik	2.3453646720532e-20	0.134211	0.651	0.666	6.28557732110256e-16
Uckl1	2.38210270097472e-20	-0.330795	0.154	0.208	6.38403523861224e-16
Pcmtd1	2.41695926110627e-20	-0.224503	0.561	0.633	6.47745081976479e-16
Lrrtm4	2.45247834766706e-20	-0.119451	0.878	0.923	6.57264197174773e-16
Clk2	2.45708102329399e-20	-0.264346	0.242	0.305	6.58497714242789e-16
Gm15336	2.52269006709151e-20	-0.354281	0.113	0.159	6.76080937980524e-16
Arxes2	2.535179264648e-20	0.619127	0.172	0.123	6.79428042925665e-16
Hsph1	3.30361032839031e-20	0.310355	0.376	0.348	8.85367568008604e-16
Kitl	3.69508593539478e-20	0.292329	0.481	0.452	9.902830306858e-16
Dvl3	3.83100367403041e-20	-0.305712	0.245	0.311	1.02670898464015e-15
Hmgxb3	3.90695254728963e-20	-0.155203	0.345	0.411	1.04706328267362e-15
Nsg2	5.39671992180289e-20	0.21102	0.625	0.623	1.44632093904317e-15
Actn1	5.68725301451758e-20	-0.203012	0.28	0.344	1.52418380789071e-15
Kcnh5	6.49537486387838e-20	0.310583	0.476	0.445	1.74076046351941e-15
Scn2b	6.66353010992188e-20	0.326964	0.426	0.377	1.78582606945906e-15
Yif1b	7.31297750531449e-20	0.635247	0.164	0.122	1.95987797142428e-15
Clasrp	7.69664739801091e-20	-0.187489	0.551	0.625	2.06270150266692e-15
Atp2b1	8.24596776642123e-20	0.252754	0.876	0.865	2.20991936140089e-15
Commd3	9.2278098793802e-20	-0.414472	0.123	0.175	2.47305304767389e-15
Dipk1b	9.95122048696489e-20	-0.357921	0.225	0.29	2.66692709050659e-15
Lef1	1.35981419411219e-19	0.257384	0.56	0.493	3.64430204022068e-15
Btaf1	1.39146732097466e-19	-0.225748	0.534	0.606	3.7291324202121e-15
Nme7	1.5239187275988e-19	0.200283	0.629	0.603	4.0841021899648e-15
Maml3	1.52980004809315e-19	-0.240412	0.417	0.491	4.09986412888963e-15
Fry	1.6414516944075e-19	0.148616	0.911	0.904	4.39909054101209e-15
Nfatc3	1.95493578325147e-19	-0.161709	0.478	0.55	5.23922789911394e-15
Bet1	2.5691448560312e-19	-0.184109	0.197	0.247	6.88530821416363e-15
Tmed8	2.6520251630066e-19	-0.270191	0.229	0.291	7.10742743685769e-15
Greb1l	2.6915210991606e-19	-0.238253	0.463	0.537	7.21327654575042e-15
Gm16093	2.80440770998616e-19	-0.270021	0.182	0.236	7.51581266276291e-15
Emc10	3.13541350238807e-19	0.259311	0.531	0.498	8.40290818640004e-15
B4gat1	3.31763370368572e-19	0.40646	0.315	0.253	8.89125832587772e-15
Edc4	3.32341906124017e-19	-0.192089	0.185	0.233	8.90676308412367e-15
Plekhn1	3.34657604072639e-19	-0.29915	0.212	0.273	8.96882378914673e-15
Cherp	3.50897778326931e-19	-0.210789	0.327	0.395	9.40406045916175e-15
Cdh18	3.6047795432878e-19	-0.210439	0.905	0.934	9.66080917601131e-15
Lonp1	3.66761692516411e-19	-0.431425	0.152	0.209	9.8292133594398e-15
Qdpr	3.67815746789874e-19	-0.5087	0.094	0.14	9.85746201396863e-15
Sgcz	4.35193058626055e-19	-0.177173	0.896	0.928	1.16631739711783e-14
Fryl	4.40543564619064e-19	0.204059	0.714	0.718	1.18065675317909e-14
Sphkap	4.9537844414019e-19	-0.148954	0.444	0.517	1.32761423029571e-14
Clip4	5.03220875949328e-19	-0.141063	0.294	0.352	1.3486319475442e-14
Thra	5.34759873603373e-19	-0.235789	0.41	0.483	1.43315646125704e-14
Psmc6	5.42447654441639e-19	0.204547	0.578	0.562	1.45375971390359e-14
Grm4	5.44690245582753e-19	0.290616	0.456	0.422	1.45976985816178e-14
Nrp2	5.5936822903442e-19	0.470237	0.243	0.234	1.49910685381225e-14
Dtx3	5.90491467525658e-19	-0.207812	0.493	0.566	1.58251713296876e-14
Gpm6a	6.25774535646457e-19	0.151907	0.859	0.861	1.67707575553251e-14
Saraf	7.79117696245992e-19	0.261481	0.544	0.504	2.08803542593926e-14
Uvrag	8.18693090093904e-19	-0.183293	0.68	0.741	2.19409748145166e-14
Secisbp2l	9.06181971580949e-19	0.142825	0.457	0.466	2.42856768383694e-14
Cbx3	9.46670666975865e-19	-0.323746	0.217	0.278	2.53707738749532e-14
Gm48837	9.86234076517833e-19	-0.436977	0.091	0.133	2.64310732506779e-14
Ydjc	1.00333771847848e-18	-0.429624	0.092	0.135	2.68894508552233e-14
Laptm4a	1.00713802036518e-18	0.297921	0.409	0.368	2.69912989457869e-14
Zfp641	1.12354607440769e-18	-0.330041	0.203	0.262	3.01110347941261e-14
Eif2b5	1.27009853364012e-18	-0.39376	0.142	0.195	3.40386407015551e-14
Nedd4l	1.37197716335716e-18	0.143298	0.863	0.864	3.67689879779719e-14
Emc4	1.377461687395e-18	0.415315	0.288	0.241	3.6915973222186e-14
Smarcd1	1.48573879969689e-18	-0.291015	0.18	0.234	3.98177998318767e-14
Srsf2	1.56989445075871e-18	-0.217197	0.436	0.508	4.20731712803335e-14
Vps13c	1.71267103268819e-18	0.133028	0.755	0.757	4.58995836760435e-14
Rps27	1.75472335860692e-18	-0.325015	0.166	0.22	4.70265860106654e-14
Ppp1r37	1.7921061652905e-18	-0.169697	0.322	0.384	4.80284452297854e-14
Timp2	1.83995789481309e-18	0.364901	0.352	0.303	4.93108715809909e-14
Gm3510	2.65998736805972e-18	-0.638584	0.135	0.184	7.12876614640005e-14
Tmem130	2.67449663455705e-18	0.179539	0.667	0.669	7.16765098061289e-14
Tasor2	2.72332780172785e-18	-0.167306	0.537	0.608	7.29851850863063e-14
Cys1	3.59607952912115e-18	-0.409793	0.085	0.124	9.63749313804468e-14
Slc25a4	3.60212792406913e-18	0.235536	0.482	0.458	9.65370283650528e-14
Cdc123	3.67794188882992e-18	-0.137848	0.386	0.449	9.85688426206418e-14
Lactb	3.83129022765031e-18	-0.344608	0.159	0.212	1.02678578101028e-13
Gfra1	4.35977731019222e-18	0.327286	0.27	0.29	1.16842031913152e-13
Tm2d2	4.82987298339395e-18	0.490258	0.211	0.16	1.29440595954958e-13
Champ1	4.93331407577392e-18	-0.429672	0.12	0.169	1.32212817230741e-13
Acsl4	5.02097414351535e-18	0.247917	0.464	0.435	1.34562107046211e-13
Bax	5.37413334890257e-18	-0.206737	0.237	0.293	1.44026773750589e-13
Tomm40	5.65682593069812e-18	-0.201037	0.464	0.535	1.5160293494271e-13
Cers1	5.6600836731147e-18	-0.393058	0.142	0.194	1.51690242439474e-13
Ddah1	5.70508359219551e-18	0.274088	0.387	0.376	1.5289624027084e-13
Dgkd	6.08487352205881e-18	-0.143166	0.463	0.53	1.63074610391176e-13
Cep68	7.45241119337614e-18	-0.278115	0.215	0.272	1.9972461998248e-13
Gm11713	7.7430700665686e-18	0.455903	0.232	0.203	2.07514277784038e-13
Lekr1	7.8837033519088e-18	-0.205118	0.509	0.58	2.11283249831156e-13
Acbd3	8.11195893862954e-18	-0.17651	0.28	0.338	2.17400499555272e-13
Fam110b	8.11892640609642e-18	0.117074	0.667	0.685	2.17587227683384e-13
Lzts3	8.4231949025738e-18	-0.459828	0.129	0.18	2.25741623388978e-13
Ptpn4	9.12047649552259e-18	0.189661	0.749	0.756	2.44428770080005e-13
Dusp15	9.60928351853824e-18	-0.466821	0.163	0.219	2.57528798296825e-13
Ildr2	1.00798204596052e-17	0.190746	0.53	0.527	2.7013918831742e-13
Gm26672	1.02092585185405e-17	-0.235363	0.22	0.277	2.73608128296886e-13
Chic2	1.06006189876412e-17	-0.172356	0.299	0.359	2.84096588868785e-13
Mgat5b	1.13522585612327e-17	0.136857	0.468	0.481	3.04240529441037e-13
BC005561	1.16781287519833e-17	-0.222632	0.413	0.483	3.12973850553152e-13
Ago1	1.26300907705784e-17	-0.123736	0.317	0.373	3.384864326515e-13
Crocc	1.30956336395688e-17	-0.216791	0.224	0.279	3.50962981540445e-13
Ubc	1.32792285844181e-17	0.525878	0.197	0.146	3.55883326062406e-13
Spg7	1.40049451482389e-17	-0.205079	0.369	0.436	3.75332529972804e-13
Traf3ip1	1.42839121502846e-17	-0.334447	0.201	0.259	3.82808845627628e-13
St3gal4	1.45298017432375e-17	0.220114	0.278	0.285	3.89398686718766e-13
Gm10419	1.66721214212244e-17	-0.262233	0.256	0.317	4.46812854088814e-13
Zdhhc1	1.73197271009894e-17	-0.17631	0.35	0.413	4.64168686306516e-13
Pcdh7	1.97763263846176e-17	-0.148773	0.89	0.922	5.3000554710775e-13
Atp6v0b	2.02079487421117e-17	-0.153051	0.88	0.915	5.41573026288592e-13
U2af2	2.11854635554321e-17	-0.214422	0.229	0.283	5.67770423285581e-13
Ptn	2.14606759971901e-17	0.26874	0.497	0.465	5.75146116724695e-13
Ddx24	2.31177822668637e-17	0.146544	0.75	0.737	6.19556564751946e-13
Acsl1	2.43511347992193e-17	-0.151581	0.39	0.454	6.52610412619076e-13
Arglu1	2.8098956858224e-17	-0.189041	0.7	0.755	7.53052043800402e-13
Sgsm2	2.8723060604796e-17	-0.194625	0.386	0.454	7.69778024208532e-13
Pdcd7	3.35273875774168e-17	-0.389442	0.184	0.24	8.98533987074771e-13
Tmx2	3.48235274497485e-17	0.243343	0.486	0.464	9.3327053565326e-13
Praf2	3.64160578682333e-17	0.622138	0.152	0.111	9.75950350868651e-13
Tmed9	4.10249340135051e-17	0.233481	0.492	0.468	1.09946823156194e-12
Rer1	4.17278703992234e-17	0.490776	0.199	0.167	1.11830692669919e-12
Dennd4b	4.28414015140961e-17	-0.361579	0.134	0.182	1.14814956057777e-12
Mdh2	4.33572209232284e-17	0.295845	0.345	0.317	1.16197352074252e-12
1110002L01Rik	4.75229973076308e-17	-0.326466	0.199	0.255	1.27361632784451e-12
Whamm	4.83773947091168e-17	-0.231654	0.265	0.326	1.29651417820433e-12
Phyhipl	5.20719745485278e-17	-0.247927	0.246	0.305	1.39552891790054e-12
Zer1	5.35897561408579e-17	-0.15986	0.445	0.511	1.43620546457499e-12
Usp19	5.51252032973296e-17	-0.23999	0.308	0.372	1.47735544836843e-12
Strn4	5.52394260246499e-17	-0.228175	0.367	0.435	1.48041661746062e-12
Sugp2	5.77420272481371e-17	-0.135921	0.393	0.455	1.54748633025007e-12
Cul9	6.52816790468433e-17	-0.156629	0.5	0.569	1.7495489984554e-12
Cgref1	6.670190158127e-17	-0.265091	0.123	0.165	1.78761096237804e-12
Ndn	7.0590229119779e-17	0.493809	0.207	0.166	1.89181814041008e-12
Fam13b	7.27171335409573e-17	-0.155694	0.682	0.743	1.94881917889765e-12
Gfpt1	7.51816003990927e-17	-0.201945	0.362	0.428	2.01486689069568e-12
Caskin1	7.53012965411977e-17	-0.269474	0.307	0.373	2.0180747473041e-12
Pex5l	7.7802210323572e-17	0.211585	0.783	0.774	2.08509923667173e-12
Rgs7bp	7.85752111828005e-17	0.157315	0.795	0.801	2.10581565969905e-12
Heatr5a	7.95451364816894e-17	-0.162187	0.225	0.275	2.13180965770928e-12
St6galnac5	8.05084173510135e-17	0.291017	0.521	0.501	2.15762558500716e-12
Gm4876	8.52723606306934e-17	0.638344	0.165	0.133	2.28529926490258e-12
Synpo2	9.62906357875759e-17	0.27363	0.476	0.452	2.58058903910704e-12
Galnt11	9.87118326559047e-17	-0.219636	0.318	0.382	2.64547711517825e-12
Syngr3	1.04053770971436e-16	0.299268	0.435	0.394	2.78864106203448e-12
Luc7l2	1.04103368498938e-16	-0.109371	0.935	0.948	2.78997027577154e-12
Gga2	1.09189672308194e-16	-0.165244	0.328	0.387	2.92628321785959e-12
Slc6a1	1.0983627859589e-16	-0.249426	0.259	0.318	2.94361226636985e-12
Cystm1	1.19126276182325e-16	-0.20942	0.227	0.281	3.19258420168632e-12
Clmn	1.2014020805899e-16	0.192957	0.495	0.494	3.21975757598094e-12
Rnf144b	1.20766456099693e-16	-0.221985	0.133	0.173	3.23654102347176e-12
Ubp1	1.22866040876008e-16	-0.154293	0.5	0.568	3.29280989547702e-12
Gm10406	1.25148950913238e-16	-0.324339	0.077	0.109	3.35399188447478e-12
Gba2	1.27035157171315e-16	-0.205701	0.267	0.324	3.40454221219124e-12
2900097C17Rik	1.30344395698828e-16	0.35742	0.32	0.273	3.4932298047286e-12
Cpne2	1.30978795167996e-16	-0.512902	0.084	0.125	3.51023171050229e-12
Nit1	1.38298601249503e-16	-0.136352	0.207	0.253	3.70640251348669e-12
Trim23	1.39871385884478e-16	-0.275948	0.29	0.354	3.748553141704e-12
Osbpl11	1.44316333978775e-16	-0.172457	0.299	0.357	3.86767775063117e-12
Sestd1	1.55368981558757e-16	0.136579	0.566	0.572	4.16388870577469e-12
Gm32509	1.61278972773952e-16	-0.176561	0.745	0.797	4.3222764703419e-12
4933411O13Rik	1.62450122111561e-16	-0.290661	0.135	0.18	4.35366327258982e-12
Rbm17	1.63684746298662e-16	-0.336255	0.146	0.195	4.38675120080414e-12
Arf5	1.88546693695792e-16	-0.290255	0.247	0.307	5.05305139104722e-12
Trim9	2.01194036303241e-16	0.129524	0.784	0.801	5.39200017292685e-12
Sidt1	2.01803653178742e-16	-0.133175	0.428	0.491	5.40833790519028e-12
Rpn2	2.06427502628043e-16	0.226988	0.412	0.397	5.53225707043154e-12
Slc25a27	2.16260517086052e-16	0.117605	0.739	0.747	5.79578185790619e-12
Las1l	2.25799093177875e-16	-0.210828	0.507	0.574	6.05141569716706e-12
Ywhag	2.26123196134909e-16	0.153323	0.728	0.722	6.06010165641556e-12
Guf1	2.39536220904684e-16	-0.208915	0.238	0.293	6.41957072024554e-12
Cnep1r1	2.50914282248914e-16	-0.270895	0.245	0.304	6.72450276427089e-12
Gm42303	2.61311224358229e-16	-0.205755	0.297	0.358	7.00314081280053e-12
Tent2	2.68379936138627e-16	-0.181219	0.447	0.514	7.19258228851522e-12
Dbp	2.69092621394587e-16	-0.387026	0.095	0.136	7.21168225337492e-12
Cacng8	2.84156695139933e-16	-0.215121	0.203	0.253	7.61539942975019e-12
Ccdc47	2.98733177422708e-16	0.192034	0.579	0.557	8.00604915492857e-12
Rimklb	3.17117517278414e-16	-0.220793	0.127	0.165	8.49874946306151e-12
Shisa4	3.26087019465892e-16	-0.304471	0.263	0.325	8.73913212168592e-12
2900093K20Rik	3.30559661083752e-16	-0.138227	0.111	0.143	8.85899891704455e-12
Pcgf2	3.55361657926101e-16	-0.310934	0.146	0.193	9.52369243241951e-12
Rab28	3.58821916918365e-16	-0.184824	0.542	0.608	9.61642737341218e-12
Epb41l4a	3.86345756818438e-16	0.483411	0.225	0.177	1.03540662827341e-11
Slc9a9	4.06895515906485e-16	-0.208882	0.431	0.499	1.09047998262938e-11
Zfp950	4.205135802835e-16	0.11936	0.69	0.7	1.12697639515978e-11
Camk2g	4.25079526293341e-16	-0.130695	0.497	0.561	1.13921313046615e-11
Inpp4b	4.90359675781036e-16	0.172785	0.9	0.886	1.31416393109318e-11
Notch3	5.31186867229645e-16	-0.248689	0.129	0.168	1.42358080417545e-11
Dhx16	5.49002142283405e-16	-0.218051	0.149	0.191	1.47132574131953e-11
Arhgap39	5.99657691039893e-16	-0.114965	0.619	0.682	1.60708261198691e-11
Cx3cl1	6.15948654207152e-16	0.166377	0.559	0.552	1.65074239327517e-11
Ablim2	6.20507045800463e-16	0.123836	0.726	0.729	1.66295888274524e-11
Decr2	6.25323637623971e-16	-0.279799	0.163	0.211	1.67586734883224e-11
Wasf3	6.57840994398574e-16	-0.206412	0.502	0.569	1.76301386498818e-11
Lsamp	6.82314244487219e-16	0.133835	0.994	0.988	1.82860217522575e-11
Ptpdc1	6.85665734720439e-16	-0.107485	0.177	0.219	1.83758416905078e-11
Afdn	6.86831901728806e-16	-0.121001	0.563	0.628	1.8407094966332e-11
Llgl1	6.88307351926154e-16	-0.402186	0.111	0.155	1.84466370316209e-11
Sema4b	7.00065561429657e-16	-0.122521	0.161	0.198	1.87617570463148e-11
Slc35b1	7.30265782419523e-16	0.281055	0.35	0.327	1.95711229688432e-11
Rabl6	8.8484740879517e-16	-0.152161	0.707	0.764	2.37139105557105e-11
Nceh1	9.53673442523158e-16	0.173388	0.625	0.609	2.55584482596206e-11
Mpc2	9.88643159141677e-16	0.213538	0.401	0.394	2.6495636664997e-11
Rpl13	1.02200657574455e-15	0.278181	0.44	0.41	2.73897762299539e-11
Rsrc2	1.05973237972105e-15	0.166393	0.64	0.63	2.84008277765242e-11
Nrip3	1.06963202018561e-15	0.187263	0.453	0.445	2.86661381409743e-11
Glt8d1	1.099785013239e-15	-0.210466	0.343	0.406	2.94742383548051e-11
Ncoa5	1.12976244851199e-15	-0.188499	0.399	0.463	3.02776336201212e-11
Plekhg5	1.13441609108876e-15	-0.360634	0.203	0.259	3.04023512411787e-11
Fam184b	1.15124862376459e-15	-0.175914	0.162	0.203	3.08534631168909e-11
Cdk9	1.15269883845896e-15	-0.227068	0.148	0.192	3.08923288707002e-11
Pdia6	1.34918480493107e-15	0.321854	0.367	0.313	3.61581527721527e-11
Chst11	1.36353709349748e-15	0.203138	0.53	0.508	3.65427941057324e-11
Cnnm2	1.46054462204095e-15	0.123051	0.553	0.578	3.91425958706975e-11
Gigyf1	1.51052217444754e-15	-0.176094	0.424	0.489	4.0481994275194e-11
Rnaseh2a	1.51508446863646e-15	-0.402743	0.11	0.153	4.06042637594572e-11
Ube2q1	1.58451548754874e-15	-0.278735	0.111	0.15	4.24650150663061e-11
Acot7	1.59765612786624e-15	0.177059	0.618	0.599	4.28171842268153e-11
Pgp	1.60477735405385e-15	-0.544922	0.11	0.155	4.30080330886433e-11
Pdlim5	1.62692177079015e-15	0.443588	0.23	0.194	4.3601503457176e-11
Gdi1	1.64211547509518e-15	-0.207191	0.337	0.398	4.40086947325508e-11
Slc9a3r2	1.66174858595148e-15	-0.383935	0.092	0.13	4.45348621034996e-11
Bcas3os1	1.7496155458035e-15	-0.144962	0.178	0.22	4.68896966275339e-11
Cit	1.83444230349411e-15	0.149357	0.917	0.919	4.91630537336422e-11
Kcnc1	1.86062993029473e-15	0.109584	0.684	0.69	4.98648821318987e-11
Rps6kb2	1.86131673317966e-15	-0.153776	0.429	0.492	4.98832884492148e-11
Coq2	1.87153679736354e-15	-0.330509	0.171	0.222	5.01571861693429e-11
Acyp2	1.90737071859853e-15	0.136521	0.713	0.71	5.11175352584406e-11
Rpn1	1.9381019678086e-15	0.315164	0.313	0.289	5.19411327372706e-11
Prkag2	2.17635067054766e-15	0.113401	0.655	0.674	5.83261979706772e-11
Fndc9	2.2826571980296e-15	-0.152638	0.383	0.443	6.11752129071932e-11
Gm20752	2.48125541305488e-15	0.614282	0.146	0.119	6.64976450698709e-11
Cpsf7	2.67092768118511e-15	-0.131671	0.431	0.491	7.15808618557609e-11
Csmd1	2.78878035126663e-15	-0.106221	0.992	0.997	7.47393134139458e-11
Rapgef4os1	2.88872009315368e-15	-0.123578	0.21	0.255	7.74176984965187e-11
Taf2	2.96449680902119e-15	-0.109024	0.358	0.412	7.9448514481768e-11
Acaa1a	3.17030561538635e-15	-0.243871	0.185	0.233	8.49641904923541e-11
Spcs2	3.26173366125261e-15	0.305401	0.393	0.339	8.74144621215701e-11
Dtnbp1	3.32305577975408e-15	-0.194493	0.368	0.43	8.90578948974094e-11
Scd2	3.62204532196505e-15	0.194075	0.492	0.485	9.70708146286634e-11
Cebpz	3.74720690933203e-15	-0.193928	0.202	0.251	1.00425145170098e-10
Atraid	3.91260569434949e-15	0.275649	0.361	0.335	1.04857832608566e-10
Rpl21	4.04631264835421e-15	0.362257	0.271	0.242	1.08441178975893e-10
Leng8	4.09074806616659e-15	-0.150608	0.655	0.715	1.09632048173265e-10
Erc2	4.24027867828659e-15	-0.166491	0.978	0.978	1.13639468578081e-10
Gab1	4.31965731822802e-15	-0.392048	0.095	0.134	1.15766816128511e-10
Ilkap	4.34021786872168e-15	-0.228891	0.262	0.319	1.16317838881741e-10
Rp9	4.34948593506816e-15	-0.178102	0.516	0.581	1.16566223059827e-10
Ankra2	4.36429239964047e-15	-0.134982	0.193	0.235	1.16963036310365e-10
Pcdh10	4.50472299056054e-15	0.258331	0.497	0.468	1.20726576147022e-10
Ankle2	4.53154760672022e-15	-0.138889	0.251	0.3	1.21445475860102e-10
Scn1b	4.6600484550103e-15	0.307856	0.317	0.289	1.24889298594276e-10
Myef2	4.78992962550698e-15	-0.183606	0.646	0.7	1.28370113963587e-10
Wasl	5.03492559101858e-15	-0.15676	0.527	0.591	1.34936005839298e-10
Hs3st1	5.25572705453295e-15	0.311763	0.26	0.241	1.40853485061483e-10
Tanc1	5.42757745253313e-15	0.20258	0.495	0.485	1.45459075727888e-10
Dnajc11	5.47830033193192e-15	-0.154673	0.394	0.455	1.46818448895775e-10
Kcnn3	5.6364034635832e-15	0.232559	0.511	0.484	1.5105561282403e-10
Entr1	5.83406987440219e-15	-0.20225	0.348	0.409	1.56353072633979e-10
Zfp934	5.84515200597924e-15	-0.114153	0.298	0.349	1.56650073760244e-10
Nop9	6.23323829372096e-15	-0.211692	0.088	0.117	1.67050786271722e-10
Zdhhc20	6.53181725397906e-15	-0.153501	0.645	0.705	1.75052702406639e-10
Pnn	6.81032052056072e-15	0.143773	0.828	0.811	1.82516589951027e-10
Gbe1	6.86778292354296e-15	0.253396	0.3	0.302	1.84056582350951e-10
Get4	7.03116756895814e-15	-0.346405	0.09	0.126	1.88435290848078e-10
Otud5	7.04761251878857e-15	-0.15734	0.237	0.284	1.88876015503534e-10
Dtnbos	7.15927198096452e-15	-0.111675	0.294	0.343	1.91868489089849e-10
Pigk	7.47786448875041e-15	0.205225	0.667	0.663	2.00406768298511e-10
Htra2	7.63344114719014e-15	-0.280877	0.172	0.22	2.04576222744696e-10
Actg1	8.15694386090499e-15	0.243508	0.259	0.254	2.18606095472254e-10
Nek9	8.63021066515709e-15	-0.123789	0.425	0.484	2.3128964582621e-10
Cthrc1	8.7753089922564e-15	0.338991	0.255	0.231	2.35178280992472e-10
Fzr1	8.77743661400609e-15	-0.30914	0.119	0.16	2.35235301255363e-10
Selenok	9.12171280954206e-15	0.366917	0.297	0.252	2.44461903295727e-10
Rab5a	9.30839276234679e-15	-0.158605	0.211	0.256	2.49464926030894e-10
Tbc1d17	9.47984353574858e-15	-0.184788	0.197	0.242	2.54059806758062e-10
Smad1	9.55390969643189e-15	0.176273	0.479	0.475	2.56044779864375e-10
Psmd7	9.6262983395386e-15	-0.23166	0.465	0.53	2.57984795499635e-10
Sema6c	9.6303628838094e-15	-0.326133	0.087	0.123	2.58093725286092e-10
Prkci	1.01829628707961e-14	-0.229795	0.239	0.293	2.72903404937336e-10
Hnrnpl	1.03166440398605e-14	-0.12988	0.616	0.677	2.7648606026826e-10
Psenen	1.0848020531772e-14	0.296297	0.228	0.219	2.9072695025149e-10
Lrrn2	1.12272093316119e-14	0.192203	0.632	0.611	3.00889210087199e-10
Ciz1	1.13431417099793e-14	-0.125436	0.273	0.321	3.03996197827444e-10
Kcnk2	1.14973392517031e-14	-0.435448	0.195	0.247	3.08128691945643e-10
Pde7b	1.1668221338285e-14	0.193728	0.69	0.688	3.12708331866037e-10
Gpm6b	1.16948411201789e-14	-0.223029	0.402	0.466	3.13421742020794e-10
Chst1	1.1797302458432e-14	0.30195	0.327	0.296	3.16167705885977e-10
Hectd3	1.22027585358383e-14	-0.28659	0.131	0.173	3.27033928760466e-10
Col26a1	1.22651345227961e-14	0.264863	0.429	0.399	3.28705605210935e-10
Mpnd	1.25761241901926e-14	-0.343467	0.098	0.135	3.37040128297162e-10
Tbc1d24	1.26184148240622e-14	-0.139928	0.399	0.457	3.38173517284866e-10
Angel2	1.29167737230044e-14	-0.129283	0.351	0.407	3.46169535776518e-10
Reps1	1.30877079367663e-14	-0.136722	0.432	0.491	3.50750572705336e-10
Aldoa	1.3683092413983e-14	0.23671	0.391	0.374	3.66706876694744e-10
Mcmdc2	1.42267030797156e-14	-0.282538	0.132	0.173	3.81275642536379e-10
Actb	1.5440807418462e-14	0.215606	0.505	0.491	4.13813638814783e-10
Clpp	1.56710206657121e-14	0.11212	0.41	0.425	4.19983353841083e-10
Zfp385b	1.72872271668114e-14	0.180316	0.719	0.727	4.63297688070546e-10
Zfp398	1.7359868249682e-14	-0.187448	0.524	0.588	4.65244469091478e-10
Ndufa13	1.76097602645746e-14	0.415015	0.237	0.188	4.71941575090598e-10
Atp8a1	1.76195421459651e-14	-0.160894	0.597	0.658	4.72203729511865e-10
Trap1	1.8382242422872e-14	-0.126128	0.275	0.323	4.92644096932969e-10
Gab3	1.84413724490051e-14	-0.17188	0.22	0.268	4.94228781633337e-10
Srpr	1.92606726067528e-14	0.101724	0.458	0.476	5.16186025860975e-10
Gnas	1.96695817946421e-14	0.161089	0.816	0.8	5.27144792096408e-10
Soga3	1.98659875859246e-14	0.130116	0.804	0.796	5.32408467302778e-10
Rab7	2.00867172796963e-14	-0.113121	0.373	0.427	5.3832402309586e-10
E4f1	2.0997663675948e-14	-0.182569	0.248	0.298	5.62737386515407e-10
Uhrf1bp1	2.22401564800296e-14	-0.24406	0.149	0.191	5.96036193664793e-10
Ints11	2.30639471114772e-14	-0.191772	0.196	0.242	6.18113782587588e-10
Acox1	2.33200681893426e-14	-0.171661	0.379	0.44	6.24977827474381e-10
2900052L18Rik	2.38303655112247e-14	-0.4747	0.088	0.126	6.38653795700823e-10
Slc35f3	2.4106566408348e-14	0.308019	0.512	0.482	6.46055979743728e-10
Homer2	2.4149989935042e-14	0.231243	0.442	0.423	6.47219730259125e-10
Agrn	2.72319353959897e-14	-0.154182	0.48	0.543	7.29815868612525e-10
Rapgef5	2.81523270517137e-14	-0.110978	0.463	0.52	7.54482364985927e-10
Rab3a	2.84823096878587e-14	0.261366	0.31	0.294	7.63325899634613e-10
Jade2	2.9838479319334e-14	-0.104437	0.148	0.181	7.99671245758151e-10
Gm27032	3.02622714702252e-14	-0.195278	0.35	0.41	8.11028875402035e-10
Nub1	3.20121799695616e-14	-0.16194	0.446	0.508	8.5792642318425e-10
Gm11906	3.28317557772053e-14	0.175278	0.332	0.339	8.79891054829103e-10
Elavl1	3.3226899350502e-14	-0.151745	0.424	0.483	8.90480902593453e-10
Flcn	3.34492423945355e-14	-0.134539	0.169	0.207	8.96439696173552e-10
Oga	3.3659236492543e-14	-0.136722	0.613	0.674	9.02067538000153e-10
Plcb1	3.39865782121762e-14	-0.230782	0.619	0.677	9.10840296086322e-10
Por	3.40090204078923e-14	0.183425	0.445	0.44	9.11441746931514e-10
Ell	3.47146188239212e-14	0.177174	0.309	0.311	9.30351784481087e-10
Ypel3	3.57425363656759e-14	-0.186643	0.366	0.425	9.57899974600114e-10
Adamts17	3.6643937666701e-14	0.148259	0.514	0.519	9.82057529467587e-10
Arrb1	3.6842681124893e-14	-0.15103	0.322	0.376	9.87383854147133e-10
Oprm1	3.75015977245742e-14	0.362834	0.3	0.283	1.00504281901859e-09
Vac14	3.7783856821723e-14	-0.152346	0.228	0.274	1.01260736282218e-09
A230004M16Rik	3.82340407436458e-14	-0.253735	0.331	0.391	1.02467229192971e-09
Ogfrl1	3.85551313588921e-14	0.258681	0.358	0.34	1.03327752041831e-09
Cd63	3.862465099712e-14	0.576045	0.122	0.102	1.03514064672282e-09
Gas6	3.8899801277755e-14	-0.146735	0.423	0.483	1.04251467424383e-09
Nrn1	3.89293968142186e-14	0.257074	0.439	0.408	1.04330783462106e-09
Ogdhl	3.92677603233785e-14	-0.227595	0.201	0.249	1.05237597666654e-09
Gm44899	4.09868006929295e-14	-0.177396	0.205	0.249	1.09844625857051e-09
Galt	4.10254954342766e-14	-0.15948	0.123	0.156	1.09948327763861e-09
Ncoa3	4.23377738916923e-14	-0.11979	0.389	0.445	1.13465234029735e-09
Nek7	4.24317867561309e-14	0.311687	0.214	0.21	1.13717188506431e-09
Strip1	4.30362383074972e-14	-0.181057	0.212	0.259	1.15337118664092e-09
Syngap1	4.3235336756887e-14	-0.180053	0.235	0.283	1.15870702508457e-09
Setdb1	4.60419768495413e-14	-0.157119	0.552	0.614	1.23392497956771e-09
Gm40841	4.88783933369358e-14	-0.136881	0.673	0.73	1.30994094142988e-09
Arhgef1	5.16109628477043e-14	-0.137452	0.333	0.387	1.38317380431848e-09
Mt3	5.39102909230803e-14	-0.12354	0.135	0.168	1.44479579673855e-09
D5Ertd579e	5.63629507365183e-14	0.129667	0.611	0.608	1.51052707973869e-09
D3Ertd751e	5.7089222769186e-14	0.292551	0.358	0.329	1.52999117021419e-09
Kcnc2	5.75958021716918e-14	0.183637	0.87	0.855	1.54356749820134e-09
Capn7	5.76831219774446e-14	-0.171997	0.406	0.466	1.54590766899551e-09
Ice1	5.96061623776317e-14	-0.157131	0.403	0.463	1.59744515172053e-09
Tex264	5.98021248133406e-14	0.273089	0.325	0.304	1.60269694499753e-09
Vgf	6.0653049673375e-14	-0.395847	0.213	0.266	1.62550173124645e-09
Gtf2a1	6.17316428428932e-14	-0.170957	0.318	0.374	1.65440802818954e-09
Trps1	6.39326368896325e-14	0.176622	0.704	0.684	1.71339466864215e-09
Dalrd3	6.41977709558872e-14	-0.156779	0.363	0.421	1.72050026161778e-09
Slc45a1	6.83956796156131e-14	0.189215	0.432	0.424	1.83300421369843e-09
Jkamp	6.8527804692351e-14	0.253521	0.446	0.415	1.83654516575501e-09
Dnajb9	6.98848609437259e-14	0.521846	0.146	0.105	1.87291427329185e-09
Zfr2	7.31698301148781e-14	-0.122944	0.539	0.599	1.96095144707873e-09
Hdac2	7.91095908543544e-14	-0.218583	0.265	0.319	2.1201370348967e-09
Rnpepl1	8.05672933025178e-14	-0.279525	0.176	0.223	2.15920346050748e-09
Cd200	8.1160595086488e-14	0.300212	0.311	0.286	2.17510394831788e-09
Ldhb	8.38372174224468e-14	0.15236	0.429	0.431	2.24683742692157e-09
Tial1	8.57363592472742e-14	-0.10285	0.618	0.676	2.29773442782695e-09
Dnajb11	8.67833687468758e-14	0.397408	0.243	0.201	2.32579428241627e-09
Pde1b	8.69838175387359e-14	-0.126982	0.279	0.327	2.33116631003812e-09
Txndc15	8.79126897565261e-14	0.270087	0.41	0.382	2.3560600854749e-09
Pdk1	9.13043642089871e-14	-0.260635	0.137	0.177	2.44695696080085e-09
Nphp3	9.43397450842123e-14	-0.20722	0.238	0.288	2.52830516825689e-09
Zmym3	9.67329795033896e-14	-0.126504	0.262	0.308	2.59244385069084e-09
Plekhg1	9.69421702011265e-14	0.211932	0.463	0.459	2.59805016139019e-09
Brf1	9.70226736085275e-14	-0.135314	0.218	0.26	2.60020765270854e-09
Slc30a9	9.73922852865379e-14	-0.184271	0.393	0.453	2.61011324567922e-09
Lars2	9.86281313005938e-14	0.225588	0.422	0.399	2.64323391885591e-09
Phtf1	1.01651631356371e-13	-0.195362	0.506	0.567	2.72426372035075e-09
Celsr3	1.0582370337806e-13	-0.194517	0.253	0.304	2.83607525053202e-09
Cox8a	1.09778861038645e-13	0.248922	0.426	0.398	2.94207347583568e-09
Adat1	1.1153152483178e-13	-0.137735	0.344	0.397	2.9890448654917e-09
Nr1d2	1.12278003649976e-13	-0.178156	0.366	0.424	3.00905049781936e-09
Usp53	1.13725662411272e-13	0.155224	0.411	0.412	3.0478477526221e-09
Sec24b	1.14695245264019e-13	-0.138264	0.704	0.757	3.0738325730757e-09
Selenos	1.1824915460324e-13	0.37334	0.248	0.216	3.16907734336684e-09
Ell2	1.19528631102985e-13	0.194995	0.29	0.288	3.20336731356e-09
Tomm70a	1.20304090217737e-13	-0.148548	0.268	0.316	3.22414961783536e-09
Ehmt2	1.24955785448082e-13	-0.15391	0.301	0.353	3.3488150500086e-09
Pkm	1.26689434511661e-13	0.222626	0.466	0.444	3.39527684491251e-09
Sacm1l	1.26833456988655e-13	-0.137274	0.536	0.596	3.39913664729594e-09
Nfx1	1.28290206726651e-13	-0.123802	0.652	0.709	3.43817754027425e-09
Clcn3	1.32443562024698e-13	0.126034	0.701	0.7	3.5494874622619e-09
Fastk	1.35348853086439e-13	-0.166059	0.267	0.317	3.62734926271656e-09
D330041H03Rik	1.36646680379279e-13	0.371557	0.189	0.174	3.66213103416468e-09
Prkaca	1.39032296203964e-13	-0.124221	0.345	0.397	3.72606553826625e-09
Cttn	1.39488533016766e-13	-0.11589	0.321	0.369	3.73829268484933e-09
Cog2	1.40298744958861e-13	0.323457	0.262	0.236	3.76000636489747e-09
9630028H03Rik	1.44200546244069e-13	-0.244567	0.208	0.258	3.86457463934105e-09
Mtrex	1.49531598047252e-13	-0.166072	0.319	0.373	4.00744682766635e-09
Ddx19b	1.51353852564255e-13	-0.154518	0.266	0.315	4.05628324872203e-09
Ahi1	1.54607298958046e-13	-0.149758	0.979	0.987	4.14347561207562e-09
Ppia	1.55297869158417e-13	0.236127	0.401	0.379	4.16198289344557e-09
Plbd2	1.61786613830755e-13	-0.25639	0.172	0.217	4.33588125066423e-09
Smap2	1.62904126349183e-13	-0.184028	0.451	0.513	4.36583058615812e-09
Atp10a	1.66471306995518e-13	0.276537	0.293	0.28	4.46143102747987e-09
Stx3	1.6812675894634e-13	-0.119062	0.4	0.455	4.50579713976191e-09
Pfkm	1.68171377471512e-13	-0.151482	0.379	0.436	4.50699291623651e-09
Vwa5b2	1.7362033054867e-13	-0.151102	0.618	0.676	4.65302485870434e-09
Fam241b	1.78913319681709e-13	-0.370016	0.098	0.136	4.7948769674698e-09
Zfp653	1.88993424974562e-13	-0.266443	0.154	0.196	5.06502378931827e-09
Smad7	1.97164491109792e-13	-0.297216	0.163	0.209	5.28400836174242e-09
Trmt2a	1.9795881434119e-13	-0.162175	0.138	0.172	5.3052962243439e-09
Tox3	2.01469805796937e-13	0.118218	0.406	0.427	5.39939079535792e-09
Col25a1	2.01747299800044e-13	0.369627	0.536	0.513	5.40682763464119e-09
Gtpbp6	2.04044134525353e-13	-0.277582	0.122	0.16	5.46838280527946e-09
Spcs1	2.0969630174191e-13	0.493227	0.173	0.136	5.61986088668319e-09
Slc2a13	2.09739554261705e-13	0.173182	0.811	0.809	5.62102005421369e-09
Pknox2	2.10060341692578e-13	-0.208295	0.417	0.478	5.6296171573611e-09
March11	2.1195982386561e-13	0.15546	0.51	0.512	5.68052327959835e-09
Chst2	2.13859147989082e-13	0.566916	0.127	0.104	5.7314251661074e-09
Clstn3	2.16105393888466e-13	0.105097	0.763	0.769	5.79162455621089e-09
Sptbn4	2.16659322928717e-13	-0.132986	0.792	0.831	5.80646985448961e-09
Kcnj9	2.17791971792653e-13	0.224084	0.401	0.38	5.83682484404311e-09
Zdhhc14	2.24932014451933e-13	0.134935	0.689	0.692	6.0281779873118e-09
Rnf126	2.25607455582088e-13	-0.202146	0.12	0.154	6.04627980959997e-09
Grin2a	2.25615304472914e-13	0.146941	0.888	0.882	6.04649015987409e-09
Bmp6	2.36059460933968e-13	0.420987	0.204	0.173	6.32639355303034e-09
Smarcb1	2.36444984462091e-13	-0.177732	0.327	0.383	6.33672558358405e-09
Grm1	2.40530496625674e-13	0.138901	0.827	0.84	6.44621730956806e-09
Rasa1	2.54636933232241e-13	-0.117552	0.485	0.543	6.82426981062405e-09
Samm50	2.8880719069796e-13	-0.103231	0.297	0.342	7.74003271070532e-09
Cables1	2.92066791711535e-13	0.22121	0.229	0.234	7.82739001786914e-09
Tmeff1	2.96409183936862e-13	-0.19612	0.207	0.254	7.9437661295079e-09
Gcfc2	2.9697013726974e-13	-0.400779	0.148	0.193	7.95879967882902e-09
Ralgds	3.01500174644079e-13	-0.195445	0.158	0.197	8.08020468046131e-09
Rab27a	3.02478998178575e-13	-0.154625	0.279	0.328	8.1064371511858e-09
Rad23a	3.04130328486221e-13	-0.258513	0.106	0.141	8.15069280343072e-09
Faap100	3.06620703375672e-13	-0.251955	0.114	0.149	8.21743485046801e-09
Slc25a13	3.15927460001255e-13	-0.254734	0.224	0.274	8.46685592803364e-09
Ddx50	3.23806143099049e-13	0.123816	0.746	0.747	8.67800463505452e-09
Nxf1	3.31084136046784e-13	-0.265333	0.216	0.266	8.87305484605382e-09
Cdon	3.37479841744612e-13	-0.144245	0.178	0.217	9.04445975875561e-09
Tspan3	3.72873373269198e-13	0.170058	0.58	0.567	9.9930064036145e-09
Zfp961	3.81602350804546e-13	-0.206355	0.398	0.458	1.02269430015618e-08
Inpp5e	3.89802649096379e-13	-0.312746	0.106	0.142	1.0446710995783e-08
Traf3ip2	4.02591280057853e-13	-0.164439	0.334	0.387	1.07894463055505e-08
Stard7	4.24524999793599e-13	-0.111684	0.35	0.399	1.13772699944685e-08
Zfp821	4.29416899966694e-13	-0.107281	0.255	0.296	1.15083729191074e-08
Gm2516	4.30175474440247e-13	-0.336076	0.392	0.447	1.15287027149986e-08
Dvl1	4.3209502103258e-13	-0.126503	0.326	0.378	1.15801465636732e-08
Cnih1	4.37740199217052e-13	0.437797	0.198	0.159	1.1731437339017e-08
Slc25a51	4.38259715877774e-13	-0.201085	0.225	0.274	1.17453603855243e-08
Trim24	4.45101456760144e-13	-0.123064	0.293	0.34	1.19287190411719e-08
Gucy1a1	4.49297761422305e-13	0.269078	0.093	0.103	1.20411800061178e-08
Mppe1	4.52347339207777e-13	-0.205505	0.184	0.228	1.21229086907684e-08
Fam126b	4.56047562990347e-13	0.112133	0.686	0.689	1.22220746881413e-08
Mmadhc	4.60910153617463e-13	-0.163153	0.133	0.167	1.2352392116948e-08
Gm43507	4.69946395684984e-13	-0.328654	0.184	0.233	1.25945634043576e-08
Frmd5	4.73703856278241e-13	-0.104822	0.931	0.953	1.26952633482568e-08
Birc2	4.74573921817496e-13	-0.191521	0.252	0.303	1.27185811047089e-08
Ei24	4.99539865902047e-13	-0.199951	0.297	0.351	1.33876684061749e-08
Krit1	5.09540458658134e-13	0.105527	0.791	0.795	1.3655684292038e-08
Fbxw2	5.23421848719813e-13	-0.140959	0.392	0.448	1.4027705545691e-08
Skap2	5.58442017345349e-13	-0.217241	0.117	0.151	1.49662460648554e-08
Prpsap1	5.61943734382639e-13	-0.236442	0.253	0.305	1.50600920814547e-08
Naaladl2	5.9738707124619e-13	-0.135192	0.866	0.89	1.60099735093979e-08
Rell1	6.04246357972969e-13	0.319256	0.268	0.246	1.61938023936756e-08
Dlst	6.26299537206967e-13	-0.151983	0.457	0.516	1.67848275971467e-08
Usp25	6.28550289322949e-13	-0.206038	0.262	0.313	1.6845147753855e-08
Scg3	6.2941649412307e-13	0.228552	0.386	0.371	1.68683620424983e-08
Gpr149	6.33283158857582e-13	0.448258	0.196	0.167	1.69719886573832e-08
Msh3	6.70870282900193e-13	0.260812	0.433	0.397	1.79793235817252e-08
Mtfr1l	6.75783699675333e-13	-0.225343	0.145	0.184	1.81110031512989e-08
Trappc8	6.77272327321313e-13	-0.1189	0.505	0.563	1.81508983722112e-08
Gosr1	6.80134970529926e-13	0.131689	0.294	0.304	1.8227617210202e-08
Rcn2	6.86997531506235e-13	-0.22888	0.451	0.51	1.84115338443671e-08
Zfp521	6.98824922111915e-13	-0.21858	0.356	0.414	1.87285079125993e-08
Zfp1	7.59412775017895e-13	-0.143982	0.369	0.423	2.03522623704796e-08
Gm42477	7.85931161163641e-13	-0.182496	0.236	0.283	2.10629551191856e-08
Selenof	8.06836458600542e-13	0.338855	0.27	0.236	2.16232170904945e-08
Krba1	8.57772052840382e-13	-0.130216	0.269	0.315	2.29882910161222e-08
Epha7	8.73826827512988e-13	0.188889	0.649	0.634	2.34185589773481e-08
Phf6	8.97282662639829e-13	0.133446	0.462	0.466	2.40471753587474e-08
Acp2	9.20671739020482e-13	0.116455	0.236	0.249	2.46740026057489e-08
Rccd1	9.27766383458444e-13	-0.338775	0.105	0.143	2.48641390766863e-08
Gns	9.56547501429926e-13	-0.110769	0.382	0.434	2.5635473038322e-08
Pnpt1	9.86799210747489e-13	-0.13717	0.478	0.537	2.64462188480327e-08
Mgll	9.92596748752795e-13	0.233334	0.314	0.313	2.66015928665749e-08
Ip6k1	9.93168686467995e-13	-0.123053	0.675	0.729	2.66169207973423e-08
Rab14	1.04991000749758e-12	0.173289	0.478	0.469	2.81375882009353e-08
Cds2	1.05497112650547e-12	0.104387	0.536	0.55	2.82732261903465e-08
Phactr1	1.07283082199017e-12	-0.298036	0.601	0.656	2.87518660293365e-08
G3bp2	1.11090096532225e-12	0.180691	0.434	0.423	2.97721458706362e-08
Zbtb46	1.11595468551722e-12	-0.172012	0.135	0.17	2.99075855718616e-08
Cdkl5	1.13913632037424e-12	0.163509	0.646	0.634	3.05288533860295e-08
Gm45645	1.14636375059794e-12	-0.310578	0.159	0.203	3.07225485160247e-08
Galc	1.15794042986696e-12	-0.189645	0.27	0.321	3.10328035204346e-08
Kcnmb4	1.20526003397025e-12	0.453274	0.18	0.155	3.23009689104028e-08
Enpp5	1.22720567938559e-12	0.268335	0.364	0.333	3.28891122075338e-08
Emc7	1.26414972212255e-12	0.248257	0.419	0.387	3.38792125528843e-08
Coro6	1.26987499191695e-12	-0.204532	0.414	0.473	3.40326497833743e-08
Necab3	1.27867843494465e-12	0.18664	0.419	0.42	3.42685820565166e-08
L3mbtl3	1.29737244837268e-12	-0.110306	0.294	0.342	3.47695816163878e-08
Trim26	1.30435060963296e-12	-0.221682	0.19	0.234	3.49565963381634e-08
Cln3	1.31392596685754e-12	-0.1954	0.189	0.232	3.52132159117821e-08
Zfp612	1.31635836412371e-12	0.119024	0.5	0.506	3.52784041585155e-08
Atp1b2	1.33161731488745e-12	0.372262	0.224	0.19	3.56873440389838e-08
Fam20c	1.3484084185381e-12	0.156422	0.368	0.371	3.61373456168209e-08
Cacnb3	1.36640646694796e-12	0.278677	0.134	0.138	3.66196933142053e-08
Supt6	1.3787936220049e-12	0.102579	0.406	0.42	3.69516690697313e-08
Slc43a2	1.38063789113649e-12	0.174527	0.537	0.525	3.70010954824579e-08
AI593442	1.42969759118969e-12	0.318351	0.295	0.258	3.83158954438838e-08
Tmeff2	1.43686731385943e-12	0.117743	0.866	0.879	3.85080440114326e-08
Dars	1.43835883928643e-12	-0.138538	0.337	0.389	3.85480168928764e-08
4930445B16Rik	1.46664090081273e-12	-0.321744	0.268	0.322	3.93059761417811e-08
Sdha	1.47995696431942e-12	0.125322	0.51	0.515	3.96628466437605e-08
Prkca	1.4968925585305e-12	-0.366755	0.412	0.459	4.01167205686175e-08
Exoc5	1.51790272834884e-12	-0.170288	0.438	0.496	4.06797931197488e-08
R3hdm4	1.52304255311917e-12	-0.108845	0.215	0.252	4.08175404235937e-08
Zfp983	1.57544454836274e-12	0.187598	0.343	0.336	4.22219138961215e-08
Unk	1.64359856168542e-12	-0.180876	0.27	0.32	4.40484414531694e-08
Ccnl1	1.72139341255953e-12	-0.162931	0.337	0.39	4.61333434565955e-08
Rabggta	1.72566465287752e-12	-0.331035	0.101	0.136	4.62478126971176e-08
Fndc4	1.75582198179667e-12	-0.213762	0.316	0.371	4.70560291121508e-08
Cdh12	1.7639497399882e-12	-0.174506	0.772	0.796	4.72738530316838e-08
Impa1	1.76595676345854e-12	0.260559	0.282	0.264	4.73276412606889e-08
Jakmip3	1.77099353016782e-12	-0.102825	0.541	0.596	4.74626266084975e-08
Cbx1	1.7856407501284e-12	-0.111124	0.383	0.434	4.78551721034411e-08
Ankrd44	1.80463021152099e-12	0.106418	0.422	0.439	4.83640896687626e-08
Tut4	1.848392155556e-12	-0.140375	0.771	0.809	4.95369097689009e-08
Tuba1a	1.86338768933399e-12	0.243059	0.342	0.328	4.99387900741511e-08
Htr2b	1.9222433517395e-12	-0.299206	0.1	0.134	5.15161218266186e-08
Gdap1l1	1.93926817894021e-12	-0.157271	0.155	0.191	5.19723871955976e-08
Gm50152	1.95560875309358e-12	-0.231873	0.105	0.138	5.2410314582908e-08
4632427E13Rik	2.07697560166192e-12	0.149778	0.725	0.719	5.56629461245393e-08
Cisd2	2.08542567170663e-12	0.192412	0.407	0.395	5.58894080017376e-08
Apba3	2.15796303449511e-12	-0.314063	0.089	0.12	5.7833409324469e-08
Gabrg3	2.16409163990291e-12	-0.119081	0.868	0.896	5.79976559493981e-08
Fbxo9	2.23519640580057e-12	-0.107304	0.28	0.324	5.99032636754553e-08
Thsd7a	2.23726032144968e-12	0.199641	0.698	0.663	5.99585766148513e-08
Krtcap2	2.25030510811909e-12	0.391601	0.212	0.17	6.03081768975917e-08
Ipo13	2.29213509435855e-12	-0.139534	0.17	0.205	6.14292205288091e-08
Acly	2.46326229375249e-12	0.19842	0.194	0.198	6.60154294725668e-08
Mast3	2.5007653612793e-12	-0.423136	0.148	0.192	6.70205116822852e-08
4930567K12Rik	2.50516942008578e-12	-0.184763	0.107	0.137	6.7138540458299e-08
B230209E15Rik	2.57572643637799e-12	0.131724	0.447	0.455	6.90294684949301e-08
Rbm33	2.69183125585591e-12	-0.111555	0.524	0.579	7.21410776569385e-08
Cops7a	2.77392682079876e-12	-0.12784	0.129	0.158	7.43412387974068e-08
Usp46	2.79648165933999e-12	-0.156033	0.405	0.461	7.49457084703117e-08
Rps28	2.85556269774837e-12	-0.31814	0.085	0.116	7.65290802996562e-08
Pebp1	2.90749747810037e-12	0.164051	0.451	0.452	7.792093241309e-08
Yy1	2.91003920770561e-12	-0.27042	0.214	0.263	7.79890507665105e-08
Sh3glb2	3.01968711481268e-12	-0.114877	0.309	0.355	8.09276146769799e-08
Nxpe3	3.02882713148285e-12	-0.106675	0.348	0.397	8.11725671237405e-08
1600010M07Rik	3.07614875658124e-12	-0.106167	0.411	0.461	8.24407866763773e-08
Ssr1	3.09059482433566e-12	0.291315	0.327	0.299	8.28279412921957e-08
Pgs1	3.09465811713567e-12	-0.339457	0.146	0.189	8.2936837539236e-08
Gsdme	3.12872720488248e-12	0.113198	0.598	0.618	8.38498890908504e-08
Ubfd1	3.22820309929612e-12	-0.358306	0.109	0.147	8.6515843061136e-08
Gm45321	3.22929586189384e-12	-0.258836	0.387	0.443	8.65451290987548e-08
Lamc1	3.30443982686542e-12	-0.137649	0.271	0.316	8.85589873599934e-08
Slc25a42	3.32759426221534e-12	-0.148122	0.29	0.339	8.91795262273711e-08
Cyb5b	3.33588887532321e-12	0.111375	0.394	0.404	8.94018218586619e-08
Atp11c	3.36421232505246e-12	0.131945	0.59	0.593	9.0160890311406e-08
Gsk3a	3.38069509219916e-12	-0.220104	0.14	0.176	9.06026284709375e-08
Gabbr2	3.44177605909435e-12	0.161329	0.89	0.893	9.22395983837285e-08
Zfp512b	3.476481672947e-12	-0.100146	0.204	0.241	9.31697088349797e-08
5730455P16Rik	3.50537066508092e-12	-0.115424	0.251	0.293	9.39439338241685e-08
Agap2	3.58964474613407e-12	-0.208017	0.17	0.211	9.6202479196393e-08
Wdr82	3.64286319188079e-12	-0.120167	0.277	0.321	9.76287335424051e-08
Slitrk6	3.65723107440236e-12	0.520729	0.139	0.106	9.80137927939833e-08
Dmd	3.76258957047977e-12	-0.110834	0.887	0.92	1.00837400488858e-07
Arvcf	3.82810997330369e-12	-0.177797	0.307	0.359	1.02593347284539e-07
Iscu	3.86077848137507e-12	-0.271908	0.2	0.248	1.03468863300852e-07
Phf20l1	3.96446878376735e-12	-0.140516	0.728	0.773	1.06247763404965e-07
Esrrb	3.9679714240472e-12	-0.396474	0.085	0.119	1.06341634164465e-07
Creg1	3.99157637031384e-12	0.392762	0.212	0.181	1.06974246724411e-07
Sar1b	4.08865289164342e-12	0.213272	0.424	0.405	1.09575897496044e-07
Ggt7	4.15379884566217e-12	0.106	0.666	0.669	1.11321809063746e-07
Uck2	4.201871001406e-12	0.129177	0.311	0.319	1.12610142837681e-07
Trank1	4.24896431307269e-12	-0.14179	0.543	0.601	1.13872243590348e-07
Ptbp2	4.29284177173388e-12	-0.107167	0.577	0.632	1.15048159482468e-07
Ppp4r3a	4.62313915768786e-12	-0.138326	0.399	0.453	1.23900129426035e-07
Snhg20	4.63168205071994e-12	-0.122585	0.315	0.362	1.24129078959295e-07
Elf2	4.74480379827414e-12	-0.151716	0.27	0.317	1.27160741793747e-07
Nptxr	4.76447568084429e-12	0.383762	0.185	0.174	1.27687948246627e-07
Tmem245	4.82278764032532e-12	-0.112034	0.446	0.5	1.29250708760719e-07
Arl6ip5	4.92015635583351e-12	0.259565	0.408	0.369	1.31860190336338e-07
Nisch	4.93853952168043e-12	-0.146937	0.674	0.725	1.32352859181036e-07
Rrbp1	5.00446445997345e-12	-0.205131	0.286	0.338	1.34119647527288e-07
Nipsnap1	5.00956716810803e-12	0.135699	0.437	0.441	1.34256400105295e-07
Hdac7	5.06268304018442e-12	-0.183973	0.38	0.436	1.35679905476943e-07
Rapgefl1	5.08199203564691e-12	-0.203984	0.304	0.356	1.36197386555337e-07
Gm26981	5.15816093683956e-12	-0.190197	0.139	0.173	1.382387131073e-07
Map3k2	5.26215712218289e-12	-0.148083	0.544	0.601	1.41025810874502e-07
Fbxo36	5.32756221930655e-12	-0.168226	0.265	0.314	1.42778667477416e-07
Rab5if	5.40285917087993e-12	-0.402834	0.11	0.149	1.44796625779582e-07
Rcbtb1	5.48080697336622e-12	-0.184752	0.261	0.31	1.46885626886215e-07
Nfe2l1	5.64695458023492e-12	0.293275	0.319	0.287	1.51338382750296e-07
Paxbp1	5.66759760248016e-12	-0.148155	0.393	0.447	1.51891615746468e-07
A530017D24Rik	5.75383323331763e-12	-0.186515	0.084	0.11	1.54202730652913e-07
Slc25a22	5.78899594656527e-12	-0.178837	0.153	0.19	1.55145091367949e-07
Atp6v0e2	5.7921691899559e-12	0.312202	0.217	0.2	1.55230134290818e-07
Psmd2	5.87217313233695e-12	-0.122142	0.189	0.225	1.5737423994663e-07
Kif1bp	5.92239446364937e-12	-0.161162	0.284	0.333	1.58720171625803e-07
Slc38a1	5.99885905229717e-12	0.121586	0.702	0.698	1.60769422601564e-07
Pank4	6.00352425417977e-12	-0.325335	0.127	0.167	1.60894450012018e-07
Eif4h	6.28128023294999e-12	-0.142458	0.366	0.418	1.6833831024306e-07
Abtb1	6.37200393530766e-12	-0.145377	0.104	0.13	1.70769705466245e-07
Unc13b	6.38592664239719e-12	0.179192	0.506	0.497	1.71142834016245e-07
Ankrd13b	6.4284365834929e-12	-0.156212	0.239	0.283	1.7228210043761e-07
Ripk2	6.49991961602021e-12	-0.227606	0.188	0.231	1.74197845709341e-07
Dock10	6.90208594916426e-12	-0.204251	0.429	0.486	1.84975903437602e-07
Gm41414	6.90378912497266e-12	0.341494	0.312	0.281	1.85021548549267e-07
Tbc1d20	7.06501135747563e-12	-0.189335	0.205	0.248	1.89342304380347e-07
Cyp51	7.12936302238652e-12	0.228663	0.436	0.405	1.91066928999959e-07
Ptpn11	7.29788835569371e-12	-0.118901	0.476	0.53	1.95583407932591e-07
Fam135b	7.47915299488209e-12	-0.109192	0.667	0.72	2.0044130026284e-07
Apoe	7.54070538500593e-12	0.181328	0.312	0.321	2.02090904318159e-07
Igip	7.83660040288217e-12	-0.264313	0.123	0.159	2.10020890797242e-07
Arsk	7.86899065496333e-12	-0.34823	0.118	0.155	2.10888949553017e-07
Ext1	8.10311514363868e-12	-0.18535	0.721	0.763	2.17163485849517e-07
Traf3	8.19476364811423e-12	-0.120523	0.414	0.467	2.19619665769461e-07
Snap23	8.23381699100302e-12	0.168844	0.394	0.39	2.20666295358881e-07
Zfp507	8.2720692905375e-12	-0.227238	0.214	0.259	2.21691456986405e-07
Tor1aip2	8.32510441285171e-12	0.144592	0.491	0.49	2.23112798264426e-07
Gm31323	8.37004199981427e-12	-0.234877	0.146	0.184	2.24317125595022e-07
Gm28050	8.43880882049855e-12	-0.226646	0.194	0.239	2.26160076389361e-07
Fam160b2	8.63968531527858e-12	-0.148145	0.204	0.243	2.31543566449466e-07
St5	8.64881143586e-12	-0.135893	0.236	0.279	2.31788146481048e-07
Nup107	8.70445662430647e-12	-0.222812	0.181	0.223	2.33279437531413e-07
Bscl2	8.75629699185478e-12	0.175688	0.448	0.441	2.34668759381708e-07
Dnajb14	9.05068427255443e-12	0.120242	0.341	0.351	2.42558338504459e-07
Usp49	9.14217190194943e-12	-0.149939	0.326	0.377	2.45010206972245e-07
Ptpre	9.7695113945714e-12	-0.186569	0.425	0.481	2.61822905374513e-07
Shisa6	9.93342972401293e-12	0.212071	0.605	0.596	2.66215916603547e-07
Sdf4	1.01007576887692e-11	0.183149	0.341	0.337	2.70700306059014e-07
Eif1	1.0347060048139e-11	0.164933	0.437	0.432	2.77301209290125e-07
Gm19710	1.04392592610094e-11	-0.104387	0.429	0.479	2.79772148195051e-07
Rab1a	1.05372546495111e-11	-0.191905	0.273	0.322	2.82398424606898e-07
Vps9d1	1.06583421360884e-11	-0.100646	0.443	0.495	2.85643569247168e-07
Glt1d1	1.08520953139874e-11	-0.13176	0.36	0.411	2.90836154414861e-07
Dgkg	1.09978909941354e-11	-0.208656	0.339	0.394	2.94743478642829e-07
Lhx9	1.10130808710556e-11	0.303942	0.256	0.24	2.95150567344289e-07
Hacd1	1.10363712196648e-11	-0.116111	0.422	0.475	2.95774748687017e-07
Hp1bp3	1.10500461894834e-11	-0.12108	0.392	0.443	2.96141237878155e-07
Lonrf1	1.11112943749988e-11	0.187578	0.323	0.318	2.97782689249968e-07
Tmc4	1.13641320169493e-11	-0.217718	0.078	0.103	3.04558738054242e-07
Rgl2	1.14016327034688e-11	-0.122766	0.267	0.31	3.05563756452963e-07
Odf2	1.15539652053721e-11	-0.106943	0.627	0.681	3.09646267503973e-07
Rtl8a	1.16473550738055e-11	0.374423	0.137	0.126	3.12149115977989e-07
Napepld	1.18881072469638e-11	0.179156	0.332	0.327	3.18601274218629e-07
Pgam1	1.21289697354164e-11	0.318647	0.257	0.229	3.2505638890916e-07
Frmpd3	1.23326654398701e-11	-0.101126	0.306	0.35	3.30515433788518e-07
Dhx36	1.25055672352658e-11	-0.151478	0.369	0.422	3.35149201905123e-07
Map3k4	1.29027579322815e-11	-0.13441	0.474	0.53	3.45793912585143e-07
Cdk10	1.3155945982415e-11	-0.217767	0.283	0.333	3.52579352328722e-07
Pmpca	1.31613291897541e-11	-0.19164	0.129	0.162	3.52723622285411e-07
Arpc5l	1.31962009038299e-11	0.194325	0.211	0.215	3.53658184222641e-07
Arrb2	1.32709697941295e-11	-0.11222	0.159	0.189	3.55661990482671e-07
Herc3	1.33561248967802e-11	-0.133651	0.577	0.633	3.5794414723371e-07
Tkt	1.33700375323596e-11	0.258691	0.305	0.284	3.58317005867237e-07
Kcna4	1.3813023666494e-11	0.249984	0.338	0.312	3.70189034262038e-07
Rchy1	1.40566268512488e-11	0.167012	0.483	0.476	3.76717599613469e-07
Vav3	1.47754203551185e-11	0.152551	0.666	0.662	3.95981265517175e-07
Fam171a1	1.50034237153189e-11	-0.108339	0.398	0.449	4.02091755570546e-07
Fubp3	1.50945428065326e-11	-0.115116	0.418	0.47	4.04533747215075e-07
Pisd	1.51970778046232e-11	-0.11567	0.258	0.298	4.07281685163901e-07
Maz	1.52155524059937e-11	-0.132461	0.114	0.141	4.07776804480632e-07
Psma1	1.52206417379653e-11	0.132962	0.571	0.571	4.07913198577471e-07
Gm36388	1.63437741725985e-11	-0.204866	0.271	0.321	4.38013147825639e-07
4930432K21Rik	1.64127531407208e-11	-0.237131	0.133	0.168	4.39861784171318e-07
Tmem259	1.67603443148575e-11	-0.175824	0.189	0.228	4.4917722763818e-07
4930581F22Rik	1.68999359358894e-11	-0.347529	0.129	0.168	4.52918283081836e-07
Scyl1	1.71259809322838e-11	-0.103522	0.121	0.148	4.58976288985206e-07
Nrd1	1.72481889355312e-11	0.132245	0.754	0.749	4.62251463472236e-07
Abcb10	1.75831731516683e-11	-0.292314	0.13	0.167	4.71229040464711e-07
Tsc22d4	1.76197289706355e-11	-0.116419	0.299	0.344	4.72208736413032e-07
Miga2	1.8099101588509e-11	0.123941	0.61	0.609	4.85055922572041e-07
Ccdc107	1.90051774814669e-11	0.308185	0.298	0.253	5.09338756503314e-07
Bmpr1a	1.93436040584043e-11	-0.113908	0.31	0.356	5.18408588765236e-07
Npas3	1.96541341640965e-11	-0.18762	0.752	0.79	5.26730795597786e-07
Trmt11	1.98300202987266e-11	0.118285	0.378	0.386	5.31444544005873e-07
Stum	2.0022351352484e-11	0.270955	0.226	0.217	5.36599016246571e-07
Gm45341	2.0405421698667e-11	-0.295665	0.259	0.309	5.46865301524275e-07
Ss18l1	2.07031635901164e-11	-0.187775	0.257	0.305	5.54844784215121e-07
Chuk	2.07427059903306e-11	-0.160548	0.447	0.502	5.55904520540859e-07
9030025P20Rik	2.08229794805667e-11	0.416463	0.154	0.133	5.58055850079187e-07
Zkscan2	2.1003988268764e-11	-0.156327	0.297	0.345	5.62906885602874e-07
Phactr2	2.12058240327122e-11	0.112199	0.555	0.564	5.68316084076686e-07
E130102H24Rik	2.16304312482854e-11	-0.117091	0.223	0.262	5.79695557454049e-07
Atp5f1	2.18933071878163e-11	0.107883	0.384	0.391	5.86740632633477e-07
Cdk5	2.20658326723388e-11	-0.13734	0.351	0.401	5.9136431561868e-07
Matk	2.24689046328388e-11	-0.115236	0.662	0.714	6.02166644160081e-07
Fam193b	2.26993329723551e-11	-0.105591	0.509	0.563	6.08342123659117e-07
Supt5	2.30314476917071e-11	-0.100008	0.342	0.385	6.17242798137752e-07
Tek	2.37777542935648e-11	0.303321	0.175	0.168	6.37243815067536e-07
Cep83	2.40807777606702e-11	-0.13313	0.49	0.546	6.45364843985961e-07
Sf1	2.43368433235322e-11	-0.100847	0.319	0.363	6.52227401070663e-07
Uhrf2	2.4471249020516e-11	-0.144259	0.533	0.589	6.55829473749828e-07
Slc2a6	2.46148118017719e-11	-0.205887	0.117	0.149	6.59676956287487e-07
Vamp2	2.52484401976037e-11	-0.221531	0.269	0.318	6.7665819729578e-07
Spopl	2.63518826752187e-11	-0.106784	0.298	0.341	7.06230455695862e-07
Trpm3	2.64949647574834e-11	0.226925	0.734	0.767	7.10065055500555e-07
Sys1	2.66712416120416e-11	-0.154559	0.351	0.402	7.14789275202714e-07
Gm1992	2.70780370813772e-11	-0.152624	0.471	0.526	7.2569139378091e-07
Ddrgk1	2.75882596464759e-11	0.274148	0.332	0.297	7.39365358525553e-07
Cped1	2.79362989046464e-11	-0.411301	0.085	0.117	7.48692810644522e-07
Cadm3	2.7986728006132e-11	0.126332	0.577	0.576	7.50044310564338e-07
Alpk1	2.8298457276298e-11	0.260884	0.179	0.175	7.58398655004785e-07
Qrich1	2.83011845794967e-11	-0.104395	0.639	0.691	7.58471746730512e-07
Frrs1l	2.85401985935902e-11	0.139342	0.497	0.494	7.64877322308216e-07
Lrrtm1	2.86599579584779e-11	0.196703	0.368	0.356	7.68086873287209e-07
Dab2ip	2.87139736892937e-11	0.103712	0.43	0.44	7.6953449487307e-07
Sycp2	2.9214590840343e-11	-0.175047	0.387	0.441	7.82951034521193e-07
Tubgcp5	2.92629030236332e-11	-0.112381	0.355	0.403	7.84245801033369e-07
Tipin	2.94606184459074e-11	-0.208469	0.172	0.212	7.89544574350317e-07
Peak1	2.96912149111541e-11	0.146635	0.537	0.539	7.95724559618929e-07
Sec24c	2.98798061174949e-11	-0.11302	0.202	0.238	8.00778803948865e-07
Zfp664	3.02242120485858e-11	-0.12938	0.323	0.37	8.100088829021e-07
Paip1	3.05680246494555e-11	-0.156348	0.278	0.325	8.19223060605407e-07
Prxl2a	3.17656966903659e-11	0.199606	0.224	0.223	8.51320671301807e-07
Eif4ebp3	3.19188412560223e-11	-0.343202	0.076	0.104	8.55424945661399e-07
Hsf2	3.24632598645841e-11	-0.114198	0.252	0.292	8.70015364370854e-07
Glod4	3.30908976187718e-11	-0.125312	0.244	0.285	8.86836056183084e-07
B3gnt2	3.33180006491968e-11	-0.130004	0.192	0.228	8.92922417398475e-07
L1cam	3.41132958096329e-11	0.16024	0.51	0.501	9.14236327698162e-07
Xylt2	3.60415349953658e-11	0.226801	0.23	0.223	9.65913137875804e-07
Ndufab1	3.60607624411607e-11	0.26395	0.225	0.215	9.66428433423107e-07
Chmp4b	3.67151954213717e-11	-0.101515	0.296	0.337	9.83967237292762e-07
Sh3pxd2a	3.69433145176238e-11	-0.117692	0.323	0.37	9.90080829072319e-07
9530036O11Rik	3.69850167849987e-11	0.350942	0.264	0.22	9.91198449837966e-07
Samd10	3.7470999556762e-11	-0.293314	0.126	0.162	1.00422278812122e-06
Fancc	3.7504728656798e-11	0.146591	0.305	0.311	1.00512672800219e-06
Micos10	3.81443698212386e-11	-0.187692	0.309	0.359	1.02226911120919e-06
Tbk1	3.88204232362883e-11	-0.167568	0.463	0.519	1.04038734273253e-06
Adgra1	3.95322565886522e-11	0.128731	0.581	0.584	1.05946447657588e-06
Hltf	4.00802502168616e-11	-0.126093	0.373	0.423	1.07415070581189e-06
Gm38604	4.01808043055357e-11	-0.164956	0.252	0.296	1.07684555538836e-06
Lrpprc	4.05649898943189e-11	-0.109365	0.567	0.621	1.08714172916775e-06
Pdzrn3	4.07061397799126e-11	-0.770038	0.119	0.153	1.09092454610166e-06
Kctd5	4.13195005302257e-11	-0.261551	0.144	0.183	1.10736261421005e-06
Gm11437	4.14392117067206e-11	0.13991	0.162	0.173	1.11057087374011e-06
Tdg	4.22171851982227e-11	-0.176262	0.129	0.159	1.13142056331237e-06
Mphosph8	4.30278368964902e-11	0.100493	0.483	0.494	1.15314602882594e-06
BC031181	4.37618854086957e-11	0.21005	0.391	0.373	1.17281852895304e-06
Pik3cb	4.46151515278144e-11	-0.119742	0.311	0.357	1.19568606094543e-06
Snhg3	4.51617797688746e-11	-0.249137	0.105	0.135	1.21033569780584e-06
Farp2	4.59436195372799e-11	-0.105458	0.361	0.408	1.2312890035991e-06
Ldb3	4.5995583886522e-11	-0.332239	0.165	0.208	1.23268164815879e-06
Gm17167	4.64762943083726e-11	-0.221373	0.118	0.15	1.24556468746439e-06
Ndst4	4.7883964437343e-11	-0.282761	0.194	0.24	1.28329024692079e-06
Zzz3	4.86606037410873e-11	-0.142101	0.381	0.434	1.30410418026114e-06
4933413L06Rik	4.91224735675151e-11	0.488065	0.132	0.105	1.31648229160941e-06
Rab3c	5.18986474921276e-11	0.115977	0.836	0.841	1.39088375278902e-06
Med26	5.19441840074139e-11	-0.176267	0.221	0.264	1.39210413139869e-06
Usp22	5.22462530546931e-11	-0.112143	0.39	0.439	1.40019958186577e-06
Ptprj	5.23511950952502e-11	0.160145	0.774	0.776	1.4030120285527e-06
Osbp	5.31973503604567e-11	-0.137304	0.271	0.314	1.42568898966024e-06
Clptm1	5.40104744141568e-11	0.139748	0.4	0.401	1.4474807142994e-06
2700054A10Rik	5.44064614140596e-11	0.235431	0.234	0.229	1.4580931658968e-06
D530033B14Rik	5.57559190257279e-11	-0.12492	0.107	0.133	1.49425862988951e-06
Clmp	5.63494789433024e-11	-0.177924	0.478	0.533	1.5101660356805e-06
Vps4b	6.00833327986307e-11	-0.137967	0.257	0.3	1.6102333190033e-06
Fkbp2	6.01504562994952e-11	0.256493	0.345	0.314	1.61203222882647e-06
Hrh3	6.08095849078186e-11	-0.333583	0.138	0.178	1.62969687552954e-06
Sesn3	6.11004962758424e-11	-0.124938	0.424	0.475	1.63749330019258e-06
Arhgap10	6.15953975393507e-11	-0.625085	0.077	0.106	1.6507566540546e-06
Armc6	6.16931023001869e-11	-0.224518	0.158	0.196	1.65337514164501e-06
2610008E11Rik	6.17901125598338e-11	0.114164	0.312	0.322	1.65597501660355e-06
Mbd2	6.32611441817882e-11	0.164949	0.392	0.386	1.69539866407192e-06
Gpi1	6.36952726045469e-11	0.123308	0.646	0.64	1.70703330580186e-06
Esrrg	6.41476656523205e-11	-0.180944	0.792	0.823	1.71915743948219e-06
Nova1	6.54318094828742e-11	-0.134606	0.547	0.601	1.75357249414103e-06
Gpc5	6.6565451999578e-11	0.120699	0.42	0.464	1.78395411358869e-06
Gm45847	6.69564696338938e-11	-0.119644	0.373	0.422	1.79443338618835e-06
Gm12743	6.72404350145606e-11	-0.106832	0.207	0.242	1.80204365839023e-06
Psph	6.77821821798722e-11	0.144976	0.133	0.145	1.81656248242057e-06
Srgap1	6.91170786704105e-11	0.161041	0.718	0.713	1.852337708367e-06
Ddi2	6.970904662514e-11	-0.164445	0.39	0.443	1.86820244955375e-06
Rtn4rl1	7.15099283979595e-11	0.203727	0.416	0.405	1.91646608106531e-06
Alg2	7.20191983171788e-11	0.375714	0.207	0.173	1.93011451490039e-06
Lrrc1	7.28223972249809e-11	-0.193417	0.205	0.247	1.95164024562949e-06
Nup210	7.82683855308884e-11	-0.241552	0.216	0.262	2.09759273222781e-06
Snx29	7.83174147656174e-11	0.130222	0.788	0.782	2.09890671571855e-06
Asph	8.17949002922988e-11	0.117465	0.566	0.572	2.19210332783361e-06
Klf7	8.19178090971402e-11	0.104793	0.541	0.55	2.19539728380336e-06
Snrk	8.26867981743744e-11	0.195425	0.41	0.392	2.21600619107323e-06
Galnt2	8.29378007817976e-11	0.257452	0.331	0.301	2.22273306095218e-06
E530011L22Rik	8.2963943685973e-11	-0.155702	0.191	0.227	2.22343369078408e-06
Armh4	8.38100721335148e-11	0.115102	0.317	0.331	2.2461099331782e-06
St8sia6	8.60494387287636e-11	-0.171783	0.13	0.161	2.30612495793086e-06
4930415C11Rik	8.65544076246021e-11	-0.115696	0.33	0.376	2.31965812433934e-06
Pias2	8.6636410443369e-11	-0.100102	0.645	0.696	2.32185579988229e-06
Slc16a11	8.83485078572125e-11	-0.225571	0.223	0.266	2.36774001057329e-06
Ahctf1	8.86119033216282e-11	-0.129652	0.461	0.512	2.37479900901964e-06
Cdh20	8.89636989401506e-11	-0.253796	0.317	0.368	2.38422713159604e-06
Sh3d19	9.18055657143303e-11	0.153048	0.606	0.603	2.46038916114405e-06
Atg7	9.36589850829053e-11	0.138996	0.365	0.37	2.51006080022186e-06
Ppid	9.40544567192777e-11	0.120108	0.222	0.232	2.52065944007664e-06
Cabp1	9.42074261696287e-11	-0.104049	0.295	0.336	2.52475902134605e-06
4930473A02Rik	9.56560899442756e-11	-0.160544	0.33	0.38	2.56358321050659e-06
Iars2	9.57324919645812e-11	-0.137582	0.347	0.395	2.56563078465078e-06
Rtel1	9.71003489307067e-11	-0.202365	0.163	0.2	2.60228935134294e-06
Copa	1.01207980927471e-10	0.107836	0.576	0.582	2.71237388885623e-06
Vti1b	1.01736096593285e-10	0.103984	0.518	0.529	2.72652738870004e-06
Pik3r2	1.03048950204012e-10	-0.166244	0.119	0.147	2.76171186546751e-06
Rasgrp1	1.03837905625025e-10	0.234974	0.333	0.315	2.78285587075067e-06
Gm4258	1.04379011519373e-10	0.146675	0.509	0.506	2.79735750871921e-06
Slc25a28	1.07164168329535e-10	-0.27176	0.162	0.202	2.87199971123155e-06
Gabpb1	1.09264835365519e-10	-0.10982	0.232	0.27	2.9282975877959e-06
Crebrf	1.15196630912557e-10	-0.141136	0.584	0.637	3.08726970845653e-06
Khdrbs1	1.15647092824944e-10	-0.121334	0.507	0.56	3.09934208770851e-06
Zfp777	1.16587736613117e-10	-0.176223	0.181	0.219	3.12455134123155e-06
Ankrd13a	1.19338317498333e-10	-0.129464	0.273	0.315	3.19826690895533e-06
Ralbp1	1.20492830714708e-10	-0.130067	0.402	0.453	3.22920786315417e-06
Ptbp3	1.22998578403431e-10	-0.112094	0.206	0.243	3.29636190121196e-06
Ddx41	1.23760954379587e-10	-0.120883	0.227	0.264	3.31679357737293e-06
Phf12	1.24260406237483e-10	-0.102983	0.505	0.557	3.33017888716455e-06
Chst10	1.25468183912686e-10	0.192292	0.332	0.327	3.36254732885999e-06
Tpp1	1.26562566604162e-10	-0.15618	0.176	0.211	3.39187678499154e-06
Dnajc8	1.28638211086012e-10	-0.166706	0.364	0.415	3.44750405710512e-06
4930432B10Rik	1.28786060097282e-10	-0.238574	0.147	0.183	3.45146641060717e-06
Tcp11l1	1.30227339360683e-10	-0.119428	0.59	0.643	3.4900926948663e-06
Plxna4os3	1.32154648155888e-10	-0.237045	0.17	0.209	3.5417445705778e-06
Gtf2h1	1.34033024329863e-10	-0.125763	0.3	0.344	3.59208505204032e-06
Eif4e3	1.35220352252555e-10	0.149215	0.242	0.248	3.62390544036848e-06
B4galt5	1.37532550404556e-10	0.12581	0.46	0.463	3.6858723508421e-06
Trpc4ap	1.39837324976228e-10	-0.117867	0.496	0.549	3.74764030936291e-06
Psip1	1.41146632798055e-10	-0.107328	0.534	0.585	3.78272975898787e-06
Btbd7	1.41284901043719e-10	-0.112948	0.6	0.653	3.78643534797166e-06
5330439K02Rik	1.44070203913348e-10	-0.277974	0.171	0.212	3.86108146487772e-06
Sfi1	1.44123914200473e-10	-0.140015	0.389	0.439	3.86252090057266e-06
1700030K09Rik	1.45774071333239e-10	-0.126317	0.157	0.187	3.9067451117308e-06
Atg3	1.47375382277295e-10	-0.112993	0.384	0.432	3.94966024503151e-06
Erp29	1.49554963125662e-10	0.255891	0.391	0.359	4.00807301176774e-06
Fam168b	1.51436046938672e-10	-0.10294	0.245	0.282	4.05848605795641e-06
Ube2e1	1.53198577217274e-10	-0.133076	0.35	0.398	4.10572186942293e-06
Pld3	1.57020601463738e-10	0.143026	0.364	0.37	4.20815211922817e-06
Slc3a2	1.59304020191728e-10	0.155372	0.514	0.505	4.26934774113831e-06
Neurl4	1.61066443812891e-10	-0.260831	0.13	0.165	4.31658069418547e-06
Tmem35a	1.64586324791731e-10	0.486593	0.131	0.098	4.41091350441839e-06
Atn1	1.65722369029534e-10	-0.135552	0.225	0.265	4.44135948999151e-06
Madd	1.67565109040911e-10	-0.101269	0.614	0.665	4.49074492229642e-06
Dmtn	1.68432945509012e-10	-0.125114	0.496	0.549	4.51400293964151e-06
Rasl10b	1.74515805415708e-10	-0.374677	0.072	0.1	4.67702358514097e-06
3110021N24Rik	1.74712742653878e-10	-0.164699	0.566	0.617	4.68230150312393e-06
Mrpl1	1.77908309384567e-10	-0.115175	0.311	0.353	4.76794269150639e-06
Gm41231	1.79804610394041e-10	0.417384	0.125	0.112	4.81876355856029e-06
Tada2a	1.83713079534309e-10	-0.137595	0.429	0.481	4.92351053151947e-06
Khsrp	1.87060860588203e-10	-0.150292	0.231	0.271	5.01323106376385e-06
Tbc1d14	1.87174357495856e-10	0.151309	0.281	0.283	5.01627278088895e-06
AI854703	1.87469874720303e-10	-0.296706	0.079	0.106	5.02419264250411e-06
Tlk2	1.89346263298583e-10	-0.114297	0.523	0.575	5.07447985640202e-06
Necab1	1.92504385252327e-10	0.258038	0.316	0.302	5.15911752476236e-06
Prmt3	1.93140115031645e-10	-0.12514	0.289	0.332	5.17615508284807e-06
Rufy1	1.93725866730427e-10	-0.105077	0.444	0.493	5.19185322837543e-06
Slc25a46	1.94033400575925e-10	-0.122559	0.259	0.301	5.20009513543479e-06
Nhs	1.94336345005489e-10	-0.133441	0.544	0.598	5.20821404614711e-06
Paqr8	1.96035523197247e-10	0.24457	0.298	0.281	5.25375202168622e-06
Sccpdh	2.00603757067748e-10	-0.285536	0.135	0.171	5.37618068941564e-06
Fnip2	2.01784883160696e-10	-0.159575	0.503	0.557	5.40783486870666e-06
Rgp1	2.10625909862263e-10	-0.102503	0.122	0.147	5.64477438430864e-06
Bcar1	2.11078830230616e-10	-0.140628	0.214	0.252	5.6569126501805e-06
Trappc10	2.11210261759287e-10	-0.133584	0.286	0.329	5.66043501514889e-06
Atp13a1	2.11623828369457e-10	-0.113445	0.203	0.238	5.67151860030145e-06
Chpf2	2.12029553034989e-10	-0.15962	0.284	0.329	5.6823920213377e-06
Cfl2	2.13990572233116e-10	-0.130024	0.247	0.287	5.7349473358475e-06
Map2k6	2.14149803663878e-10	-0.127753	0.322	0.368	5.73921473819192e-06
Adamts10	2.16041897320312e-10	-0.107656	0.231	0.268	5.78992284818437e-06
Syt7	2.24130841519631e-10	0.113944	0.729	0.741	6.0067065527261e-06
Mettl25	2.2871356143853e-10	-0.144005	0.295	0.341	6.1295234465526e-06
Nudt4	2.29116730122085e-10	0.198225	0.172	0.175	6.14032836727187e-06
Trappc6b	2.30557348259109e-10	-0.115103	0.316	0.359	6.17893693334412e-06
Ngdn	2.33821220517987e-10	0.202662	0.216	0.213	6.26640870988205e-06
Flot1	2.34490780615765e-10	-0.128145	0.253	0.292	6.2843529205025e-06
Rras2	2.34837639956562e-10	-0.131419	0.157	0.189	6.29364875083588e-06
Lgmn	2.35166950656099e-10	0.182444	0.42	0.405	6.30247427758345e-06
Slc7a8	2.38219895301288e-10	0.132936	0.465	0.467	6.38429319407453e-06
Drap1	2.43332328071574e-10	-0.271069	0.113	0.146	6.52130639231818e-06
Slc25a14	2.45712374284304e-10	0.242035	0.258	0.245	6.58509163081934e-06
Fmnl1	2.52624260712512e-10	-0.11385	0.153	0.182	6.77033018709533e-06
Tctn2	2.52931039468332e-10	-0.174245	0.212	0.253	6.7785518577513e-06
Ccz1	2.53481017957693e-10	-0.122532	0.396	0.445	6.79329128126617e-06
Agpat5	2.62384624996674e-10	0.118593	0.408	0.412	7.03190794991086e-06
Fkbp4	2.64423344900605e-10	-0.137328	0.264	0.306	7.08654564333621e-06
Rplp1	2.65785283919044e-10	0.386077	0.15	0.133	7.12304560903038e-06
Gm15283	2.70059588157594e-10	-0.25595	0.136	0.172	7.23759696262352e-06
Arhgef10	2.70557135483096e-10	-0.239839	0.084	0.11	7.25093123094697e-06
Maoa	2.75002854526537e-10	0.342972	0.135	0.128	7.3700765013112e-06
Ccser2	2.7733928076505e-10	-0.10589	0.527	0.578	7.43269272450333e-06
Nr3c1	2.82905883245645e-10	0.100289	0.48	0.493	7.58187767098328e-06
Tubb2a	2.96085354096345e-10	0.257403	0.282	0.261	7.93508748978206e-06
Flt3	2.962477360099e-10	-0.153657	0.534	0.586	7.93943932506532e-06
Car10	2.973039215082e-10	0.140033	0.763	0.776	7.96774509641975e-06
Ythdc2	2.97504358347109e-10	-0.135661	0.384	0.434	7.97311680370253e-06
Ezh2	3.07456233455206e-10	-0.238702	0.155	0.193	8.23982705659952e-06
Tcte2	3.09522851132908e-10	-0.168427	0.172	0.207	8.29521241036194e-06
Ahdc1	3.17196928103937e-10	0.105174	0.321	0.331	8.50087767318551e-06
Erg28	3.19538346624975e-10	0.235962	0.332	0.318	8.56362768954932e-06
Bcl7a	3.21684766563788e-10	-0.148746	0.247	0.287	8.62115174390952e-06
Aars2	3.21713490182165e-10	-0.160906	0.151	0.184	8.62192153688203e-06
Plxnc1	3.23081427044849e-10	0.248009	0.369	0.345	8.65858224480196e-06
Itpk1	3.23280701004507e-10	-0.135158	0.343	0.39	8.6639227869208e-06
Tmbim1	3.26635048248159e-10	-0.273035	0.157	0.196	8.75381929305067e-06
Dok5	3.27863621503735e-10	-0.162875	0.289	0.334	8.78674505630011e-06
Erlec1	3.40883893340477e-10	0.142614	0.538	0.525	9.13568834152477e-06
Grk3	3.4184902954e-10	0.125281	0.558	0.555	9.16155399167199e-06
Gdap1	3.47185558898932e-10	0.128548	0.458	0.458	9.30457297849137e-06
Tmem94	3.51556907483828e-10	-0.139799	0.164	0.195	9.42172512056658e-06
Sec16a	3.52939058069096e-10	-0.10269	0.327	0.371	9.45876675625177e-06
Sh3bp4	3.54575704547107e-10	0.348191	0.197	0.177	9.50262888186246e-06
Sf3b3	3.59367557328616e-10	0.111973	0.469	0.476	9.63105053640691e-06
Kdelr1	3.61845718904e-10	0.27324	0.278	0.254	9.69746526662721e-06
Sox2ot	3.6694438535531e-10	-0.366624	0.157	0.198	9.83410952752232e-06
Cul5	3.76412083559335e-10	-0.129697	0.598	0.649	1.00878438393902e-05
Rnf182	3.79236863343231e-10	0.212547	0.282	0.275	1.01635479375986e-05
Snx6	3.85206133321216e-10	0.135629	0.556	0.549	1.03235243730086e-05
Rmdn1	3.89361851571324e-10	0.114189	0.831	0.828	1.04348976221115e-05
Extl2	3.89492622389319e-10	0.326469	0.195	0.174	1.04384022800338e-05
Gm48727	3.95430484397009e-10	-0.23653	0.323	0.373	1.05975369818398e-05
Wdr76	3.98358561372724e-10	-0.1546	0.211	0.25	1.0676009444789e-05
D8Ertd738e	4.04130677773686e-10	-0.219978	0.101	0.129	1.08307021643348e-05
Atp6v0d1	4.05571542662699e-10	-0.105572	0.422	0.47	1.08693173433603e-05
Gm50250	4.06454230216011e-10	-0.26019	0.129	0.163	1.08929733697891e-05
Tmem256	4.20121395017703e-10	-0.13021	0.08	0.1	1.12592533864745e-05
Crim1	4.27396016283488e-10	0.116673	0.553	0.556	1.14542132363975e-05
Fbn1	4.27850860322599e-10	-0.112405	0.243	0.282	1.14664030566457e-05
Cyth1	4.36070593705228e-10	-0.133055	0.513	0.566	1.16866919113001e-05
Tmem8	4.39448791485493e-10	-0.251776	0.108	0.138	1.17772276118112e-05
Kctd8	4.48781889450635e-10	0.395244	0.38	0.377	1.2027354637277e-05
Pkd2l2	4.50165521784284e-10	-0.163398	0.15	0.181	1.20644359838188e-05
Rnf144a	4.52364488940313e-10	-0.244199	0.203	0.245	1.21233683036004e-05
Cox11	4.5367554975612e-10	-0.200002	0.302	0.351	1.2158504733464e-05
Soat1	4.56164373705821e-10	0.220035	0.207	0.201	1.2225205215316e-05
Pccb	4.58748265849257e-10	-0.133559	0.267	0.308	1.22944535247601e-05
Col19a1	4.66191651133783e-10	-0.315158	0.135	0.173	1.24939362503854e-05
Ptprr	4.75380235223784e-10	0.172882	0.696	0.687	1.27401903039974e-05
Timm44	4.79277714217609e-10	-0.107096	0.437	0.485	1.28446427410319e-05
Blm	4.80267740424179e-10	-0.106597	0.222	0.257	1.2871175443368e-05
Igdcc4	4.88693278746693e-10	-0.134768	0.286	0.329	1.30969798704114e-05
Nt5dc3	4.96047685533426e-10	0.141336	0.445	0.44	1.32940779722958e-05
Mtmr14	5.0402260383317e-10	-0.106485	0.221	0.256	1.3507805782729e-05
Yipf3	5.07023106908761e-10	0.25808	0.163	0.157	1.35882192651548e-05
Cog3	5.10924962457105e-10	-0.180994	0.32	0.37	1.36927889938504e-05
Os9	5.16271610563757e-10	0.131436	0.475	0.471	1.38360791631087e-05
Arhgef3	5.1859841760599e-10	-0.196173	0.306	0.354	1.38984375918405e-05
Mrs2	5.26217952312387e-10	-0.121066	0.265	0.305	1.4102641121972e-05
Mgat3	5.29294854723364e-10	0.167611	0.353	0.343	1.41851021065861e-05
Man2a1	5.36423530312594e-10	0.149697	0.481	0.477	1.43761506123775e-05
Csgalnact1	5.48413590101e-10	0.161078	0.381	0.38	1.46974842147068e-05
Pias4	5.53496811409991e-10	-0.141027	0.161	0.193	1.48337145457877e-05
Pkd1	5.54136066629313e-10	-0.126942	0.707	0.751	1.48508465856656e-05
Dpp8	5.63483899872841e-10	-0.128505	0.405	0.454	1.51013685165921e-05
Tssc4	5.67207431641866e-10	0.184063	0.128	0.132	1.5201159168002e-05
Nat8l	5.75857576229343e-10	0.276312	0.299	0.265	1.54329830429464e-05
Repin1	5.82159300981683e-10	-0.235685	0.131	0.165	1.56018692663091e-05
H2afy	5.91113756297276e-10	-0.129072	0.395	0.443	1.5841848668767e-05
Pigt	5.99427632845511e-10	0.232383	0.288	0.272	1.60646605602597e-05
Ints10	6.04413373370752e-10	0.111147	0.453	0.459	1.61982784063362e-05
Echdc1	6.17896929103915e-10	-0.125103	0.306	0.349	1.65596376999849e-05
Esco1	6.18226907077307e-10	-0.117512	0.479	0.529	1.65684811096718e-05
Mesd	6.19565127213333e-10	0.389535	0.18	0.151	1.66043454093173e-05
Nup93	6.2659758820189e-10	0.100776	0.549	0.556	1.67928153638107e-05
Mfsd6	6.38732319290135e-10	0.114694	0.431	0.436	1.71180261569756e-05
Meis3	6.50345681748832e-10	-0.104889	0.158	0.187	1.74292642708687e-05
Ern1	6.51054010102591e-10	-0.130426	0.223	0.259	1.74482474707494e-05
Sarm1	6.53794258613469e-10	-0.168988	0.156	0.189	1.7521686130841e-05
Rtkn	6.65853230715445e-10	-0.288827	0.102	0.133	1.78448665831739e-05
Flii	6.77395624089698e-10	-0.200805	0.293	0.34	1.81542027256039e-05
Fkbp5	6.84022531977597e-10	-0.142852	0.226	0.265	1.83318038569996e-05
Tmem47	6.85949443535969e-10	0.355758	0.238	0.2	1.8383445086764e-05
Fuca1	6.88267353830716e-10	0.258144	0.22	0.208	1.84455650826632e-05
Gm48006	6.91576087195848e-10	-0.332937	0.085	0.114	1.85342391368487e-05
Sptlc1	6.97882762914368e-10	0.169569	0.394	0.385	1.8703258046105e-05
Rgs7	6.9829507003591e-10	-0.114761	0.92	0.929	1.87143078769624e-05
Rundc3a	7.1060947139021e-10	-0.106163	0.385	0.431	1.90443338332576e-05
Ptpru	7.14489250380295e-10	-0.161106	0.25	0.291	1.91483119101919e-05
Platr25	7.20517628329679e-10	-0.114491	0.237	0.274	1.93098724392354e-05
2310061I04Rik	7.21550334022724e-10	-0.129036	0.168	0.198	1.9337548951809e-05
Ap3b2	7.25357056128849e-10	-0.104147	0.538	0.587	1.94395691042532e-05
Odc1	7.3472628290487e-10	-0.14546	0.099	0.124	1.96906643818505e-05
Fmn1	7.48346095133197e-10	-0.165958	0.515	0.565	2.00556753495697e-05
Rgs11	7.5548947176197e-10	-0.122687	0.357	0.403	2.02471178432208e-05
Adprh	7.60097123915603e-10	0.374837	0.186	0.157	2.03706029209382e-05
Cul4a	7.74487936443879e-10	-0.118062	0.423	0.472	2.0756276696696e-05
Gabrd	7.8861621139556e-10	0.238398	0.287	0.275	2.1134914465401e-05
Cmc1	7.9039726139513e-10	-0.118024	0.182	0.213	2.11826466053895e-05
Mboat2	7.90821729972582e-10	-0.121869	0.424	0.472	2.11940223632652e-05
Nek1	7.93477708151317e-10	-0.114555	0.699	0.743	2.12652025784553e-05
Stat3	8.12435850542006e-10	0.143102	0.305	0.309	2.17732807945257e-05
Map1s	8.58681150297414e-10	0.303943	0.228	0.208	2.30126548279707e-05
Gm12905	8.59305581596952e-10	-0.205668	0.207	0.248	2.30293895867983e-05
Aplp1	8.60824482710972e-10	-0.109767	0.578	0.628	2.3070096136654e-05
Pnma2	8.65657599823326e-10	-0.188844	0.177	0.214	2.31996236752651e-05
Lats1	8.724977420969e-10	-0.153434	0.282	0.325	2.33829394881969e-05
C2cd3	8.86184792137254e-10	0.104687	0.398	0.409	2.37497524292784e-05
Nol9	8.94211815592759e-10	-0.19918	0.12	0.15	2.39648766578859e-05
Mia3	8.96118180154389e-10	0.118794	0.557	0.561	2.40159672281376e-05
Elovl4	8.96574574979528e-10	0.251905	0.292	0.268	2.40281986094513e-05
Arl13b	8.96924662029977e-10	-0.126122	0.231	0.268	2.40375809424034e-05
Yipf4	8.97046047680877e-10	-0.260335	0.215	0.258	2.40408340778475e-05
Rtca	9.29544506659966e-10	0.126729	0.309	0.311	2.49117927784871e-05
Mtx2	9.4819921362068e-10	-0.118417	0.354	0.4	2.54117389250342e-05
Ampd2	9.53335522912332e-10	-0.135733	0.14	0.169	2.55493920140505e-05
Vapa	9.70931311535611e-10	-0.149215	0.408	0.458	2.60209591491544e-05
Lrrc4	9.81030113186036e-10	-0.119168	0.456	0.505	2.62916070333858e-05
Syt13	9.91217550982412e-10	0.146832	0.479	0.476	2.65646303663287e-05
Rhbdd1	1.00041433671476e-09	-0.123051	0.151	0.179	2.68111042239555e-05
Sptbn2	1.00783204519111e-09	-0.119925	0.395	0.441	2.70098988111216e-05
Sh3bp5	1.0117331174675e-09	-0.113249	0.271	0.308	2.71144475481291e-05
Sp3	1.02404205077451e-09	-0.109039	0.288	0.329	2.7444326960757e-05
Zmat4	1.02871780032666e-09	0.137617	0.691	0.675	2.75696370487544e-05
Slc39a10	1.03710124321709e-09	0.231191	0.33	0.309	2.77943133182181e-05
Ppp1r14c	1.04298978306544e-09	-0.136451	0.383	0.432	2.79521261861539e-05
Wdr1	1.05224803419956e-09	-0.254729	0.163	0.201	2.82002473165482e-05
BC004004	1.06361534021932e-09	-0.119412	0.267	0.305	2.85048911178778e-05
4930509J09Rik	1.07111886394925e-09	-0.361917	0.213	0.255	2.87059855538398e-05
Sh3kbp1	1.07697840801483e-09	-0.149331	0.68	0.72	2.88630213347974e-05
Tom1	1.080515108423e-09	0.103081	0.351	0.36	2.89578049057364e-05
Tmem106c	1.09847481752122e-09	-0.240078	0.111	0.14	2.94391251095686e-05
Ndst2	1.10934423977659e-09	-0.296366	0.077	0.104	2.97304256260126e-05
Rps13	1.11353512710263e-09	0.201533	0.375	0.355	2.98427414063504e-05
Nlgn2	1.12679058692936e-09	-0.122442	0.291	0.332	3.01979877297069e-05
Rassf5	1.12873286915585e-09	-0.177446	0.166	0.2	3.02500408933767e-05
Phf2	1.12941118741932e-09	-0.189637	0.172	0.207	3.02682198228378e-05
Kmt2d	1.1384743566447e-09	-0.116696	0.289	0.331	3.0511112758078e-05
Edem2	1.14479268280967e-09	-0.111739	0.167	0.197	3.06804438992992e-05
Fbxl6	1.17102619759724e-09	-0.164035	0.118	0.146	3.13835020956061e-05
Eif3b	1.17115123399714e-09	-0.256897	0.117	0.149	3.13868530711233e-05
Brinp2	1.18649590916532e-09	0.152765	0.655	0.636	3.17980903656306e-05
Cep85l	1.19412154564309e-09	-0.112801	0.348	0.392	3.20024574232348e-05
Srsf4	1.19764133958183e-09	-0.131543	0.318	0.361	3.20967879007932e-05
Gm14532	1.21634649265583e-09	-0.355133	0.082	0.11	3.25980860031762e-05
Snhg1	1.22849497310233e-09	-0.143539	0.102	0.126	3.29236652791425e-05
Crtc2	1.23988392599907e-09	-0.342554	0.081	0.109	3.3228889216775e-05
Gspt1	1.25702180391278e-09	-0.10624	0.402	0.449	3.36881843448626e-05
Ppfia3	1.25852804625124e-09	-0.111483	0.358	0.401	3.37285516395332e-05
Pbx2	1.26308084374855e-09	-0.123752	0.086	0.106	3.38505666124612e-05
Tab1	1.28653467457602e-09	-0.135026	0.168	0.199	3.44791292786374e-05
1110046J04Rik	1.31592080187605e-09	-0.186616	0.189	0.226	3.52666774902781e-05
Trp53inp2	1.31969665329362e-09	0.154847	0.277	0.278	3.53678703082691e-05
Ezh1	1.32490464720583e-09	-0.132792	0.275	0.316	3.55074445451161e-05
Map3k12	1.36964596434924e-09	-0.139681	0.376	0.424	3.67065118445597e-05
2010300C02Rik	1.38066732348172e-09	-0.373699	0.149	0.187	3.70018842693101e-05
Ints2	1.38597743801645e-09	-0.137868	0.279	0.322	3.71441953388408e-05
H3f3a	1.39437502268514e-09	0.199308	0.372	0.356	3.73692506079618e-05
Pou6f1	1.40072792751187e-09	-0.175694	0.262	0.305	3.75395084573181e-05
Setd1a	1.42154979693281e-09	-0.112862	0.232	0.268	3.80975345577993e-05
Tm2d1	1.44295919439994e-09	0.156285	0.33	0.329	3.86713064099183e-05
Zfand2b	1.44935010868045e-09	-0.132352	0.165	0.195	3.88425829126361e-05
Sart1	1.46328110202748e-09	-0.281731	0.112	0.144	3.92159335343364e-05
Tomm20	1.46544153640012e-09	0.251551	0.3	0.274	3.92738331755231e-05
Prkcg	1.47806397293773e-09	0.131872	0.54	0.534	3.96121144747311e-05
Bet1l	1.56439648332583e-09	0.142795	0.132	0.14	4.19258257531322e-05
Bri3	1.57175656658413e-09	-0.102013	0.164	0.194	4.21230759844546e-05
Shld2	1.60279025697407e-09	-0.10193	0.222	0.257	4.29547788869051e-05
Krcc1	1.63204693561948e-09	-0.215902	0.152	0.187	4.37388578746022e-05
Sumf1	1.64529924112718e-09	-0.138937	0.239	0.277	4.40940196622085e-05
Lin7b	1.66719275541966e-09	-0.181839	0.129	0.158	4.46807658452468e-05
Rac3	1.67726740176982e-09	-0.266349	0.127	0.161	4.49507663674313e-05
Klhl26	1.69685384282561e-09	0.173973	0.278	0.275	4.54756829877264e-05
Lmtk2	1.70977576962961e-09	-0.108718	0.587	0.636	4.58219906260737e-05
Tmem68	1.71735726264521e-09	-0.182934	0.152	0.185	4.60251746388916e-05
Klf3	1.78402918207273e-09	-0.224757	0.132	0.165	4.78119820795491e-05
Stmn2	1.78977555540505e-09	0.13779	0.746	0.73	4.79659848848553e-05
Arl1	1.80325490408039e-09	0.202637	0.161	0.162	4.83272314293544e-05
C920021L13Rik	1.8127359338438e-09	-0.20024	0.159	0.194	4.85813230270139e-05
AC156546.1	1.82825549759792e-09	-0.169407	0.084	0.107	4.89972473356242e-05
Rbm34	1.86634170613259e-09	-0.232452	0.15	0.185	5.00179577243534e-05
Cuta	1.86652260891529e-09	0.195794	0.13	0.132	5.00228059189297e-05
Tubb3	1.87049466761125e-09	0.134835	0.599	0.59	5.01292570919814e-05
Mapre2	1.89384569343002e-09	0.104987	0.787	0.785	5.07550645839245e-05
Cnksr2	1.89942245578548e-09	-0.198392	0.621	0.664	5.09045218150509e-05
Sipa1l1	1.92679239958908e-09	-0.153923	0.573	0.623	5.16380363089872e-05
March8	2.0182338958898e-09	-0.104393	0.296	0.335	5.40886684098466e-05
Kmt2b	2.02158769014058e-09	-0.141765	0.212	0.248	5.41785500957675e-05
Polg	2.03265839550646e-09	-0.11845	0.224	0.26	5.4475244999573e-05
Leng9	2.04111777580672e-09	-0.103017	0.229	0.263	5.47019563916201e-05
Grik5	2.04377542065429e-09	-0.116871	0.506	0.555	5.47731812735349e-05
Numbl	2.05832022739765e-09	-0.133747	0.15	0.18	5.5162982094257e-05
Wdr48	2.11784092924842e-09	-0.159261	0.244	0.285	5.67581369038577e-05
Mpv17	2.13512802777613e-09	-0.168769	0.185	0.22	5.72214311444004e-05
Ano5	2.13652362242838e-09	0.168666	0.47	0.452	5.72588330810806e-05
Zfp90	2.15011628059375e-09	0.239511	0.139	0.136	5.76231163199124e-05
Prkcd	2.20529563447889e-09	0.270479	0.337	0.31	5.91019230040343e-05
Npm1	2.21266975284486e-09	0.129252	0.299	0.306	5.92995493762422e-05
Msto1	2.21578079356646e-09	-0.114329	0.139	0.166	5.93829252675812e-05
Kcnab3	2.23668537659112e-09	0.119436	0.15	0.159	5.99431680926421e-05
Gm15520	2.26931510000334e-09	-0.17014	0.239	0.28	6.08176446800895e-05
Ctsd	2.27061679202617e-09	0.25973	0.282	0.261	6.08525300263014e-05
Phf10	2.28701757436054e-09	-0.204917	0.113	0.142	6.12920709928625e-05
Srebf2	2.2965618185208e-09	0.128768	0.554	0.549	6.15478567363574e-05
Ctnnal1	2.31694231367498e-09	-0.105337	0.52	0.569	6.20940540064894e-05
Mvb12a	2.32407242835103e-09	-0.206625	0.182	0.218	6.22851410798077e-05
Endod1	2.35764127390317e-09	0.311293	0.224	0.201	6.31847861406049e-05
2810004N23Rik	2.37249393775466e-09	0.107078	0.237	0.248	6.35828375318248e-05
Tmem33	2.38056521732226e-09	0.318467	0.224	0.196	6.37991478242366e-05
Mlx	2.38271319212902e-09	-0.169743	0.098	0.123	6.38567135490577e-05
Ctnna1	2.38727823352294e-09	-0.122213	0.268	0.307	6.39790566584148e-05
Lpp	2.42310775881468e-09	-0.106424	0.435	0.483	6.49392879362335e-05
Prdx2	2.42414201191523e-09	-0.142589	0.367	0.414	6.49670059193282e-05
Cacng4	2.44674190243521e-09	0.258825	0.289	0.269	6.55726829852636e-05
Abhd16a	2.46423046421298e-09	0.154583	0.402	0.396	6.60413764409079e-05
Phldb1	2.4758351475949e-09	-0.159142	0.154	0.186	6.63523819555432e-05
Vps26c	2.4768555854749e-09	-0.143377	0.166	0.198	6.63797296907273e-05
Nefm	2.47905562917659e-09	0.328917	0.244	0.211	6.64386908619325e-05
Ndufb11	2.49334134108274e-09	0.469801	0.119	0.098	6.68215479410175e-05
Vps37d	2.50258209691219e-09	-0.273626	0.146	0.182	6.70692001972467e-05
1110004F10Rik	2.53532610698049e-09	0.193459	0.308	0.301	6.79467396670771e-05
Got2	2.58943909452345e-09	0.109991	0.453	0.461	6.93969677332284e-05
Wrnip1	2.63451820090108e-09	-0.3106	0.104	0.135	7.06050877841491e-05
Ercc3	2.69352856359725e-09	-0.103757	0.093	0.114	7.21865655044063e-05
Mrto4	2.7148293162339e-09	-0.204454	0.078	0.1	7.27574256750685e-05
Ap1m1	2.7437210469755e-09	0.208942	0.251	0.245	7.35317240589435e-05
Camkk1	2.77197810083535e-09	-0.147883	0.189	0.224	7.42890131023874e-05
Far1os	2.78150959310762e-09	-0.104024	0.293	0.33	7.45444570952842e-05
Disc1	2.78441241366967e-09	0.333414	0.187	0.168	7.46222526863472e-05
Gm48239	2.83771344817766e-09	-0.118049	0.146	0.173	7.60507204111612e-05
Ndufv3	2.87993915863119e-09	-0.176661	0.168	0.201	7.71823694513158e-05
Pnmal1	2.89615295691454e-09	0.401755	0.166	0.133	7.76168992453098e-05
Odf2l	2.90551076305184e-09	-0.115199	0.294	0.333	7.78676884497893e-05
Cnih2	2.932875478615e-09	-0.304553	0.077	0.103	7.86010628268821e-05
Zbtb25	2.95869162096934e-09	-0.152688	0.22	0.257	7.92929354419782e-05
Trdmt1	3.02598620338085e-09	-0.258441	0.114	0.145	8.10964302506067e-05
Psmd13	3.16345757505966e-09	-0.181345	0.285	0.33	8.47806630115988e-05
C2cd2	3.40909256135153e-09	-0.115111	0.326	0.367	9.1363680644221e-05
Mtdh	3.43416829804719e-09	0.105859	0.78	0.78	9.20357103876647e-05
Rdh13	3.43450277958365e-09	0.258719	0.293	0.267	9.20446744928417e-05
Glis2	3.47576609093809e-09	-0.106423	0.195	0.226	9.31505312371407e-05
Gm48957	3.52904470520152e-09	-0.292435	0.155	0.192	9.45783980994006e-05
Malt1	3.53527264768806e-09	-0.194181	0.305	0.352	9.47453069580401e-05
Eid1	3.56928020130301e-09	-0.316753	0.162	0.201	9.56567093949206e-05
Tm9sf3	3.59311805063393e-09	0.154616	0.326	0.324	9.62955637569893e-05
Tmem132a	3.62367130890948e-09	0.246406	0.29	0.271	9.7114391078774e-05
Nrip2	3.63596650616286e-09	-0.10301	0.246	0.282	9.74439023651647e-05
Eef2k	3.66645399521435e-09	-0.1082	0.293	0.331	9.82609670717445e-05
Nexn	3.67100545527859e-09	0.227031	0.324	0.309	9.83829462014661e-05
Tmem179	3.76138477388866e-09	0.226784	0.352	0.329	0.000100805
Atp8b2	3.87397442282656e-09	-0.109715	0.282	0.321	0.000103823
Ociad1	3.88890631248192e-09	0.163248	0.471	0.452	0.000104223
Tasor	3.911041890393e-09	-0.11508	0.48	0.528	0.000104816
2700062C07Rik	3.97149010227939e-09	0.159	0.108	0.113	0.000106436
Gm16054	4.01505933173809e-09	-0.345587	0.089	0.118	0.000107604
Rps6ka1	4.03079666688028e-09	-0.151762	0.161	0.192	0.000108025
Gm2824	4.0756827818842e-09	-0.269309	0.176	0.214	0.000109228
Ldb1	4.18516782452086e-09	-0.101595	0.145	0.172	0.000112162
Vstm2a	4.23886078426582e-09	0.182995	0.285	0.283	0.000113601
Tram1l1	4.25045138766866e-09	0.497215	0.117	0.094	0.000113912
Golph3	4.36453114316578e-09	-0.184669	0.171	0.205	0.000116969
Prrt1	4.37460480231742e-09	-0.19633	0.158	0.192	0.000117239
Cox7b2	4.40413528043765e-09	0.347603	0.201	0.173	0.000118031
Adk	4.40887563136687e-09	-0.12546	0.663	0.708	0.000118158
Ywhab	4.52558397136862e-09	0.149648	0.3	0.299	0.000121286
Myg1	4.55550210475553e-09	-0.209739	0.091	0.116	0.000122087
Zfp27	4.58716965984903e-09	0.193822	0.162	0.161	0.000122936
Gm48956	4.59506350424898e-09	-0.391792	0.081	0.11	0.000123148
Inpp5a	4.70408054286845e-09	0.10843	0.568	0.575	0.000126069
Srfbp1	4.73157229725012e-09	-0.295878	0.128	0.162	0.000126806
Zfp523	4.77462771795546e-09	-0.112713	0.325	0.367	0.00012796
Ythdf1	4.78870029497627e-09	-0.163646	0.152	0.183	0.000128337
Cdan1	4.86726106209626e-09	-0.184626	0.157	0.191	0.000130443
Timm17a	4.94382376968095e-09	0.175549	0.289	0.284	0.000132494
Ergic3	5.04905812875452e-09	0.234003	0.304	0.286	0.000135315
Foxn2	5.08688217719753e-09	-0.200502	0.129	0.158	0.000136328
Fzd6	5.12400850235992e-09	0.490496	0.115	0.098	0.000137323
Acss2	5.13032351131425e-09	-0.136732	0.476	0.525	0.000137493
Nkain1	5.29563041029139e-09	-0.128147	0.229	0.265	0.000141923
Nsun2	5.30204145587494e-09	-0.182121	0.278	0.322	0.000142095
Rad18	5.32081042455464e-09	-0.17303	0.136	0.165	0.000142598
Tmpo	5.32118764349902e-09	-0.154032	0.143	0.172	0.000142608
Car4	5.4046036229035e-09	0.322443	0.115	0.111	0.000144843
Gde1	5.46947537348711e-09	0.161089	0.456	0.44	0.000146582
Prkar2a	5.49368491300462e-09	0.107403	0.354	0.367	0.000147231
Osgepl1	5.57213232875155e-09	0.140457	0.169	0.176	0.000149333
Cyfip1	5.6408932945233e-09	-0.100017	0.409	0.453	0.000151176
Ctr9	5.69997693521087e-09	0.119387	0.368	0.373	0.000152759
Sap130	5.70709139661085e-09	0.12637	0.512	0.507	0.00015295
Zscan18	5.72471937206576e-09	-0.120671	0.216	0.25	0.000153422
Gm3294	5.72969939061912e-09	0.11673	0.255	0.262	0.000153556
Smad9	5.77234163312345e-09	-0.188137	0.139	0.169	0.000154699
Omg	5.82475011013432e-09	0.368004	0.137	0.121	0.000156103
Adamts20	5.82661445618476e-09	-0.147285	0.138	0.165	0.000156153
Ube2j1	5.82944838697103e-09	-0.224298	0.112	0.14	0.000156229
2510009E07Rik	5.87960237105702e-09	-0.100324	0.269	0.307	0.000157573
Hnrnpll	5.95637571359158e-09	-0.10902	0.315	0.355	0.000159631
Dph6	6.22792420132275e-09	-0.136695	0.394	0.441	0.000166908
Gm45435	6.2718096108849e-09	-0.125884	0.147	0.174	0.000168084
Pacs2	6.34248505041858e-09	-0.111036	0.361	0.404	0.000169979
Aldh4a1	6.38371828929998e-09	-0.187869	0.156	0.189	0.000171084
Pde8a	6.39233469503096e-09	-0.354129	0.08	0.108	0.000171315
Bckdhb	6.39634429671064e-09	-0.106596	0.578	0.625	0.000171422
Gm49189	6.4570726467803e-09	-0.140569	0.116	0.142	0.00017305
Eno1	6.60086909431725e-09	0.24495	0.299	0.273	0.000176903
Grip2	6.67228976158343e-09	-0.156673	0.223	0.26	0.000178817
Peli2	6.68120516433769e-09	0.170733	0.253	0.25	0.000179056
Pdzd8	6.69644861980028e-09	0.144411	0.383	0.38	0.000179465
Unc50	6.71330800128572e-09	0.322719	0.217	0.185	0.000179917
Git1	6.71778638740225e-09	-0.2028	0.111	0.138	0.000180037
Rps12	6.89145933895464e-09	-0.127379	0.172	0.203	0.000184691
Tcerg1l	6.90385387787694e-09	-0.130523	0.284	0.323	0.000185023
Mrnip	6.92143974649488e-09	-0.145807	0.158	0.189	0.000185495
Trp53inp1	7.00157465676253e-09	-0.153993	0.081	0.103	0.000187642
Msmo1	7.40424582923401e-09	0.256584	0.305	0.275	0.000198434
Gm26901	7.40667224988620e-09	-0.144532	0.124	0.151	0.000198499
Gm11250	7.49974709179282e-09	0.280153	0.126	0.121	0.000200993
Cbfa2t2	7.56020535072896e-09	-0.11129	0.681	0.726	0.000202614
Mrpl23	7.56415892512521e-09	-0.184935	0.162	0.194	0.000202719
Ddx20	7.6188949142719e-09	-0.297653	0.121	0.153	0.000204186
Sec11c	7.65062735435735e-09	0.240626	0.318	0.292	0.000205037
Spata1	7.76487332180454e-09	-0.135371	0.093	0.115	0.000208099
Cdc7	7.79109169962613e-09	-0.210975	0.273	0.317	0.000208801
B430010I23Rik	7.8240069070095e-09	0.127674	0.186	0.195	0.000209683
Mras	7.85065327069757e-09	-0.147546	0.293	0.335	0.000210398
Gpr108	7.9045602959056e-09	0.174048	0.208	0.207	0.000211842
Fam185a	7.9699694890425e-09	-0.120024	0.294	0.334	0.000213595
Kansl2	8.01351402854166e-09	-0.110471	0.288	0.327	0.000214762
Rock1	8.13288185616017e-09	-0.117375	0.75	0.787	0.000217961
Suco	8.19515889273435e-09	0.111452	0.459	0.464	0.00021963
Nt5m	8.27715457484557e-09	-0.164437	0.265	0.306	0.000221828
Hmg20b	8.28960074180454e-09	0.217367	0.106	0.109	0.000222161
Gm41361	8.34610674087253e-09	-0.222746	0.27	0.314	0.000223676
Map7	8.39098517848065e-09	-0.103815	0.602	0.649	0.000224878
Gm32442	8.40487260879004e-09	0.413298	0.14	0.117	0.000225251
Dap3	8.52014310189304e-09	-0.113329	0.279	0.317	0.00022834
2410006H16Rik	8.56338043853847e-09	-0.207577	0.107	0.134	0.000229499
Ttc26	8.56532703674683e-09	-0.100882	0.185	0.215	0.000229551
Ndst1	8.57778451809508e-09	0.154078	0.349	0.344	0.000229885
Gdpd1	8.76409065711126e-09	0.11468	0.58	0.574	0.000234878
Stx2	8.7705994717778e-09	-0.15911	0.189	0.224	0.000235052
Atp13a2	8.88405778690374e-09	-0.109724	0.38	0.423	0.000238093
Abcf3	8.97280523434102e-09	-0.106535	0.192	0.222	0.000240471
Syt5	9.0192492293337e-09	0.227574	0.194	0.187	0.000241716
Lrrc39	9.09066180187337e-09	-0.136653	0.117	0.142	0.00024363
Gabra5	9.09295330624834e-09	0.140583	0.263	0.271	0.000243691
Ryr2	9.14014695129584e-09	-0.128762	0.664	0.705	0.000244956
Ociad2	9.15528832265113e-09	0.150428	0.412	0.408	0.000245362
Ick	9.45495067868247e-09	0.11915	0.401	0.401	0.000253393
Pex13	9.46615305768092e-09	0.119774	0.493	0.492	0.000253693
Ranbp17	9.58637543529875e-09	-0.133437	0.571	0.618	0.000256915
Taco1	9.64121696029029e-09	0.242104	0.201	0.192	0.000258385
Faim	9.70546461376387e-09	-0.276167	0.157	0.193	0.000260106
Gmeb1	9.78609102408110e-09	-0.121255	0.363	0.407	0.000262267
Ciao3	9.95297605319415e-09	-0.119549	0.164	0.192	0.00026674
Galns	1.02317824180556e-08	-0.24259	0.155	0.189	0.000274212
Gm1673	1.02320239486853e-08	0.25793	0.14	0.135	0.000274218
Trabd	1.0270569320439e-08	-0.103372	0.229	0.261	0.000275251
Gm26590	1.02716770758716e-08	-0.171888	0.088	0.11	0.000275281
Dpp7	1.0314374118711e-08	-0.131016	0.109	0.133	0.000276425
6330411D24Rik	1.05578758181053e-08	0.164582	0.565	0.561	0.000282951
Ssh3	1.08923419866709e-08	-0.150194	0.091	0.113	0.000291915
Gm14211	1.11587177868796e-08	0.143342	0.325	0.329	0.000299054
Dip2b	1.11607573736418e-08	-0.102326	0.751	0.79	0.000299108
Puf60	1.12351587524898e-08	-0.161577	0.261	0.302	0.000301102
Cwh43	1.12698621909304e-08	0.393543	0.161	0.138	0.000302032
Fam163a	1.13075963989721e-08	0.110131	0.284	0.294	0.000303044
Colec12	1.13407450539897e-08	0.433358	0.161	0.132	0.000303932
Eef1a1	1.13656591147649e-08	0.167731	0.394	0.386	0.0003046
Rab22a	1.15474087987124e-08	-0.277244	0.152	0.188	0.000309471
Rbm4b	1.23963021738391e-08	-0.130901	0.484	0.531	0.000332221
Usp11	1.27224336456485e-08	-0.129303	0.295	0.335	0.000340961
Rpl6	1.28964961990412e-08	0.195531	0.421	0.392	0.000345626
Gm50270	1.31652105548043e-08	-0.263749	0.081	0.105	0.000352828
Akt1	1.33227299050046e-08	-0.137346	0.121	0.146	0.000357049
Rnf166	1.34771281563145e-08	-0.12066	0.215	0.249	0.000361187
Bmper	1.38622875797223e-08	-0.248156	0.156	0.191	0.000371509
Crmp1	1.39599141565296e-08	-0.133808	0.535	0.583	0.000374126
Mettl6	1.39995155263855e-08	-0.138067	0.192	0.225	0.000375187
Ints6l	1.41861712494361e-08	-0.123047	0.418	0.463	0.000380189
Kirrel	1.42320995028681e-08	-0.201253	0.172	0.206	0.00038142
Ulk1	1.44286652817348e-08	-0.113196	0.165	0.194	0.000386688
Cdc16	1.44964447806999e-08	-0.190073	0.212	0.251	0.000388505
Sgms2	1.4578069345948e-08	-0.194097	0.142	0.173	0.000390692
Qpct	1.49194167341185e-08	0.377544	0.153	0.131	0.00039984
Creld1	1.49763581255501e-08	0.14211	0.365	0.364	0.000401366
Epm2a	1.50263656796445e-08	-0.126896	0.247	0.282	0.000402707
Zfp568	1.51211576436467e-08	0.228077	0.182	0.178	0.000405247
Agbl5	1.52482942994235e-08	-0.133323	0.12	0.144	0.000408654
Cep135	1.52684370992389e-08	-0.134024	0.319	0.362	0.000409194
Cep131	1.56752448080918e-08	-0.347488	0.118	0.15	0.000420097
Ap1b1	1.57132645249184e-08	-0.102536	0.498	0.544	0.000421115
Mzt1	1.57320928523791e-08	-0.246108	0.134	0.166	0.00042162
Abcb7	1.59063513061178e-08	0.174668	0.353	0.344	0.00042629
Dcaf10	1.59567309629736e-08	-0.105601	0.337	0.378	0.00042764
Gramd4	1.59655458184813e-08	-0.115331	0.207	0.24	0.000427877
Tmem165	1.59744832488878e-08	-0.116336	0.243	0.278	0.000428116
Srrm4os	1.59883751998502e-08	0.201912	0.227	0.223	0.000428488
Egln1	1.61320321652828e-08	-0.176187	0.255	0.296	0.000432338
Tarsl2	1.62923093255454e-08	-0.161574	0.131	0.159	0.000436634
Ctns	1.63161487202923e-08	-0.124421	0.172	0.202	0.000437273
Gm41609	1.64951083756938e-08	-0.218621	0.193	0.231	0.000442069
Rusc1	1.66507509137405e-08	-0.118686	0.351	0.394	0.00044624
Fam118a	1.67077392957681e-08	-0.143011	0.187	0.219	0.000447767
Ddost	1.68353545812159e-08	0.299683	0.19	0.171	0.000451188
Appl2	1.69523889300041e-08	-0.138023	0.34	0.384	0.000454324
Pard3b	1.70744271005609e-08	0.461873	0.125	0.114	0.000457595
Snrpc	1.70813856907758e-08	0.113436	0.121	0.131	0.000457781
Snx15	1.71066367119513e-08	-0.145795	0.167	0.198	0.000458458
Mapk6	1.73190351383995e-08	-0.177641	0.164	0.196	0.00046415
Fam234b	1.73735376622794e-08	0.194366	0.314	0.301	0.000465611
Nfxl1	1.73786002051606e-08	-0.139243	0.174	0.205	0.000465746
Smpd3	1.76631918564598e-08	0.126791	0.406	0.411	0.000473374
Cda	1.777969513678e-08	-0.306038	0.108	0.138	0.000476496
Cdk5r1	1.78636704749865e-08	0.248046	0.221	0.207	0.000478746
Arpc5	1.80845111968267e-08	-0.27904	0.129	0.161	0.000484665
Nell2	1.83409997473636e-08	0.114704	0.728	0.723	0.000491539
Hsf1	1.86427694403826e-08	-0.163653	0.303	0.346	0.000499626
Pml	1.86837350101626e-08	0.104878	0.105	0.115	0.000500724
Slc7a6	1.87695059518678e-08	0.111836	0.53	0.532	0.000503023
Pms2	1.88774472769963e-08	0.115197	0.317	0.321	0.000505916
Dynlt1a	1.88832716787097e-08	0.109148	0.22	0.227	0.000506072
Epb41l5	1.8980542850058e-08	0.125969	0.36	0.361	0.000508679
Babam1	1.91636102304002e-08	0.168569	0.295	0.292	0.000513585
Bcl9l	1.92905750041113e-08	-0.102644	0.104	0.125	0.000516987
Lpcat4	1.93371487857541e-08	-0.140254	0.206	0.24	0.000518236
Pram1	1.94508244062177e-08	-0.110979	0.199	0.23	0.000521282
Fam173a	1.98230815851073e-08	0.128593	0.369	0.37	0.000531259
Xpa	1.99776293715352e-08	-0.138849	0.242	0.279	0.0005354
Sult4a1	2.01814921735232e-08	0.12043	0.286	0.29	0.000540864
Fbxl19	2.04202001856145e-08	-0.121056	0.21	0.243	0.000547261
Rflnb	2.07736670503923e-08	-0.370435	0.075	0.101	0.000556734
Grid2	2.07780640165528e-08	-0.110768	0.97	0.974	0.000556852
Cbx7	2.07931603280277e-08	-0.176629	0.172	0.205	0.000557257
Dnajc15	2.10525535878097e-08	0.109365	0.418	0.425	0.000564208
Cluh	2.11540922138325e-08	-0.19206	0.218	0.257	0.00056693
Slc16a2	2.12948049083954e-08	-0.182452	0.126	0.153	0.000570701
Parl	2.18825478340338e-08	0.149562	0.39	0.385	0.000586452
Gm16226	2.26903186277069e-08	-0.137709	0.143	0.17	0.000608101
Gpc6	2.31337601901363e-08	-0.194499	0.6	0.642	0.000619985
Kifc3	2.34061172371646e-08	-0.127018	0.206	0.239	0.000627284
4930549G23Rik	2.34946559359147e-08	0.10411	0.214	0.223	0.000629657
Igsf3	2.3617907807742e-08	0.207625	0.212	0.207	0.00063296
Atp5b	2.37135808095223e-08	0.102785	0.428	0.432	0.000635524
Hcfc2	2.39494925051992e-08	-0.100832	0.167	0.194	0.000641846
Ddx39	2.40844155192752e-08	-0.203009	0.087	0.111	0.000645462
Ptpn23	2.41564576170222e-08	-0.152869	0.236	0.272	0.000647393
Bnc2	2.42743242745295e-08	0.491257	0.113	0.085	0.000650552
Serpinc1	2.44756719959508e-08	-0.140646	0.098	0.12	0.000655948
Slc22a5	2.46377671434192e-08	-0.115867	0.142	0.168	0.000660292
Gmppa	2.48287669658086e-08	-0.1528	0.083	0.104	0.000665411
Furin	2.50349570906317e-08	-0.145549	0.144	0.173	0.000670937
Pbx1	2.52155165670815e-08	0.100653	0.938	0.931	0.000675776
Plekha1	2.53774906393441e-08	-0.109578	0.522	0.568	0.000680117
Gm20732	2.58587283758625e-08	0.193088	0.234	0.231	0.000693014
Gstcd	2.58930312739637e-08	-0.203876	0.208	0.246	0.000693933
Gm15414	2.61404942159531e-08	-0.149398	0.229	0.265	0.000700565
Rragd	2.61475114399458e-08	-0.136935	0.151	0.179	0.000700753
Abcc4	2.62994344779489e-08	-0.220429	0.092	0.116	0.000704825
Cdk2ap1	2.63304831321938e-08	-0.204577	0.08	0.102	0.000705657
Cpeb1	2.64458445811911e-08	-0.124023	0.562	0.609	0.000708749
Cnksr3	2.66574980471415e-08	0.229456	0.295	0.277	0.000714421
Rtn2	2.68591401721483e-08	-0.162945	0.087	0.108	0.000719825
Elfn1	2.68920604816152e-08	0.314504	0.1	0.096	0.000720707
Ankrd55	2.70381302816665e-08	-0.125587	0.442	0.488	0.000724622
Serpine2	2.72283278925468e-08	0.181258	0.437	0.397	0.000729719
Akt1s1	2.74363665110493e-08	-0.214304	0.089	0.112	0.000735295
Gm12526	2.75622316337822e-08	-0.25239	0.079	0.103	0.000738668
Olfm1	2.76562907473642e-08	0.163421	0.411	0.4	0.000741189
Cwf19l1	2.7661360635479e-08	-0.131553	0.095	0.117	0.000741324
N4bp2l1	2.8101106515062e-08	-0.110931	0.552	0.599	0.00075311
Aacs	2.81822018274622e-08	0.115711	0.291	0.297	0.000755283
March6	2.82405320209107e-08	0.11422	0.64	0.632	0.000756846
Zfp385a	2.83558000998301e-08	-0.142311	0.307	0.349	0.000759935
Heatr1	2.85589189396298e-08	0.106841	0.18	0.19	0.000765379
6430590A07Rik	2.85951274870517e-08	0.222941	0.255	0.244	0.000766349
Gtf2ird2	2.89945921873691e-08	-0.121139	0.257	0.294	0.000777055
Rpe	2.90640823738539e-08	0.10354	0.181	0.189	0.000778917
Wipf2	2.93388541071976e-08	0.10027	0.487	0.492	0.000786281
Elovl6	2.96901292078336e-08	0.114731	0.602	0.597	0.000795695
AC163638.2	2.97431637917905e-08	-0.158146	0.092	0.113	0.000797117
Gm20275	2.98004054260406e-08	-0.10423	0.63	0.675	0.000798651
Ugp2	3.00080220181234e-08	0.12304	0.244	0.249	0.000804215
Fam129b	3.03414315272135e-08	-0.11243	0.117	0.141	0.00081315
March3	3.1175288624733e-08	0.104321	0.455	0.47	0.000835498
Ppp1r16b	3.1394742051087e-08	-0.152494	0.274	0.313	0.000841379
Pdhb	3.17428990780535e-08	0.112254	0.351	0.355	0.00085071
Zfp697	3.19437928353607e-08	-0.127971	0.278	0.317	0.000856094
Trim3	3.21058983346655e-08	-0.150787	0.357	0.401	0.000860438
Selenon	3.25153642010897e-08	-0.178047	0.13	0.158	0.000871412
Inpp1	3.30178846152154e-08	0.13809	0.256	0.259	0.000884879
A230072E10Rik	3.30733758350212e-08	-0.155379	0.186	0.22	0.000886366
Fuca2	3.30921669162716e-08	0.31937	0.176	0.157	0.00088687
Rnf111	3.32888075726505e-08	-0.101418	0.525	0.571	0.00089214
Tmed10	3.33871060107518e-08	0.152913	0.495	0.477	0.000894774
Abhd17a	3.34375659016489e-08	-0.218455	0.085	0.108	0.000896127
Ndufs7	3.36187019902075e-08	0.27491	0.199	0.183	0.000900981
Myo19	3.3766497220521e-08	-0.189091	0.215	0.252	0.000904942
Txn1	3.38232744251661e-08	0.228493	0.134	0.134	0.000906464
Wdr36	3.39881907804567e-08	0.204954	0.3	0.283	0.000910884
Got1	3.40530231401605e-08	0.158967	0.396	0.38	0.000912621
Slc25a1	3.41176012367112e-08	-0.153922	0.097	0.119	0.000914352
Wdr19	3.44940609840857e-08	-0.118781	0.194	0.225	0.000924441
Fstl1	3.45357349632795e-08	0.20122	0.249	0.243	0.000925558
Gm14703	3.49746251499695e-08	-0.101577	0.19	0.22	0.00093732
Pitpnb	3.52414913467889e-08	-0.137546	0.396	0.44	0.000944472
Cpne6	3.55364313036779e-08	-0.193036	0.186	0.221	0.000952376
Gm20754	3.56583863872878e-08	-0.198039	0.487	0.533	0.000955645
Bcat1	3.58156593460263e-08	-0.152161	0.32	0.362	0.00095986
Stip1	3.58188492182688e-08	0.139555	0.384	0.38	0.000959945
Dip2a	3.58758205469196e-08	-0.136974	0.485	0.532	0.000961472
Nup205	3.60675158257235e-08	-0.119911	0.289	0.328	0.000966609
Lrrc45	3.63732849574363e-08	-0.118396	0.423	0.468	0.000974804
Tbc1d2b	3.64021293041277e-08	-0.108407	0.138	0.163	0.000975577
Stradb	3.72392348186684e-08	-0.159041	0.191	0.225	0.000998011
Fxyd7	3.74417753815222e-08	0.198194	0.142	0.143	0.00100344
Usp54	3.74672126712511e-08	-0.1152	0.362	0.404	0.00100412
Dgkq	3.76000615464944e-08	-0.141639	0.242	0.278	0.00100768
Dnajc24	3.77464942995492e-08	0.131338	0.378	0.378	0.00101161
Pam16	3.79909660585032e-08	0.244299	0.111	0.11	0.00101816
Cyb561	3.80108751175913e-08	0.398037	0.143	0.121	0.00101869
Paxx	3.81966502527343e-08	-0.231682	0.174	0.209	0.00102367
Intu	4.00616343171918e-08	-0.132967	0.135	0.162	0.00107365
Pdia4	4.0410600141623e-08	0.420788	0.11	0.095	0.001083
Tmem56	4.07108726029208e-08	0.156733	0.348	0.345	0.00109105
Abtb2	4.09535200068532e-08	-0.257094	0.095	0.121	0.00109755
Hgsnat	4.10127621086083e-08	-0.145684	0.26	0.298	0.00109914
Asap2	4.28583544805131e-08	-0.126825	0.582	0.627	0.0011486
Cars	4.29048102749643e-08	0.124505	0.303	0.305	0.00114985
Phkg2	4.33344806949385e-08	-0.112744	0.288	0.326	0.00116136
Eml2	4.3994289486479e-08	-0.11845	0.619	0.663	0.00117905
Slc35a3	4.43383350473096e-08	-0.106343	0.302	0.338	0.00118827
Rfx1	4.51076035345494e-08	-0.106367	0.202	0.232	0.00120888
Tub	4.52569601615302e-08	-0.104555	0.354	0.394	0.00121289
Pign	4.54015946369781e-08	0.175441	0.335	0.325	0.00121676
Josd1	4.57410993393716e-08	-0.17518	0.142	0.171	0.00122586
Gm12296	4.64379187856368e-08	0.149553	0.369	0.364	0.00124454
Plch2	4.6546305286539e-08	0.113577	0.332	0.341	0.00124744
Gm12160	4.68707699271571e-08	-0.253458	0.175	0.211	0.00125614
Pithd1	4.71705970113442e-08	-0.178248	0.151	0.181	0.00126417
Zfp157	4.71953926587662e-08	0.129288	0.367	0.367	0.00126484
Cyc1	4.74490879241015e-08	-0.146002	0.215	0.248	0.00127164
Tmem208	4.80327299767095e-08	0.15289	0.461	0.446	0.00128728
E2f4	4.8378731597257e-08	-0.208181	0.128	0.157	0.00129655
Bivm	4.84658402675863e-08	0.161925	0.223	0.222	0.00129888
Rorb	4.92012606050393e-08	0.175915	0.542	0.536	0.00131859
St6gal2	4.96079986081343e-08	0.107119	0.421	0.427	0.00132949
Pcf11	5.00150300467566e-08	-0.116373	0.362	0.403	0.0013404
Tmem39b	5.04027064148028e-08	0.110526	0.273	0.278	0.00135079
Gm14634	5.17734616387753e-08	-0.145414	0.171	0.202	0.00138753
Nckipsd	5.18980638701915e-08	-0.133622	0.146	0.171	0.00139087
Gm16541	5.20535353730069e-08	0.104118	0.188	0.198	0.00139503
St6galnac3	5.21857630385399e-08	-0.196366	0.419	0.465	0.00139858
Gm45323	5.25071725774378e-08	-0.222235	0.374	0.419	0.00140719
Ddx31	5.25844269349657e-08	0.105107	0.189	0.197	0.00140926
Tacr1	5.33394129402134e-08	0.447319	0.135	0.108	0.0014295
Dusp8	5.3430237203878e-08	-0.206303	0.126	0.155	0.00143193
Rreb1	5.34470964219504e-08	0.215076	0.279	0.274	0.00143238
Zfp260	5.35150847189939e-08	-0.116205	0.167	0.195	0.0014342
Mthfr	5.35685255628762e-08	0.165846	0.328	0.319	0.00143564
Dtwd2	5.40465821728935e-08	-0.299032	0.09	0.116	0.00144845
Snx19	5.48401428833392e-08	0.106069	0.225	0.232	0.00146972
Ccar2	5.66533174754088e-08	-0.105932	0.157	0.183	0.00151831
Tmem50a	5.79075678148053e-08	0.273747	0.275	0.249	0.00155192
Vapb	5.86338304949502e-08	-0.140882	0.289	0.328	0.00157139
Prxl2c	5.88401821498056e-08	-0.153514	0.423	0.469	0.00157692
Gm47591	5.96381415044584e-08	-0.200096	0.286	0.329	0.0015983
Kri1	6.03394798386591e-08	-0.181763	0.187	0.222	0.0016171
Bmp2k	6.04452065917169e-08	-0.133759	0.187	0.218	0.00161993
Zmym6	6.06120740500143e-08	-0.104352	0.447	0.49	0.0016244
Adal	6.06552624511238e-08	0.129723	0.207	0.214	0.00162556
Eif3k	6.0771715591767e-08	0.214427	0.129	0.128	0.00162868
Dennd4c	6.19902945490215e-08	-0.108221	0.568	0.614	0.00166134
Crhr1	6.20373896610505e-08	-0.137572	0.172	0.202	0.0016626
Ptms	6.2544033413898e-08	-0.133003	0.141	0.167	0.00167618
Map1a	6.25449529903388e-08	0.150952	0.423	0.412	0.0016762
Lig1	6.28868327060075e-08	-0.146475	0.109	0.132	0.00168537
Pde2a	6.29923436057384e-08	0.296817	0.138	0.144	0.00168819
Tusc3	6.3012847855131e-08	0.108948	0.662	0.667	0.00168874
Hlcs	6.30395016909465e-08	-0.115637	0.498	0.544	0.00168946
9530068E07Rik	6.44825809128031e-08	0.251669	0.208	0.195	0.00172813
Tab3	6.45342865873338e-08	-0.101863	0.171	0.198	0.00172952
Gm44593	6.49038236219071e-08	0.27374	0.147	0.145	0.00173942
Hmgcs1	6.49670304978562e-08	0.194669	0.271	0.265	0.00174112
3300002I08Rik	6.53801165309764e-08	0.177435	0.212	0.21	0.00175219
Pak6	6.54730752890794e-08	-0.114769	0.128	0.152	0.00175468
Gm20033	6.57415077208843e-08	-0.336263	0.075	0.1	0.00176187
Wrap73	6.63035735122557e-08	-0.156055	0.161	0.191	0.00177694
Gan	6.64008627911691e-08	-0.102171	0.187	0.215	0.00177954
Tmco1	6.65395018371634e-08	0.149064	0.279	0.278	0.00178326
Fbxo8	6.68557740465492e-08	-0.116892	0.365	0.407	0.00179173
Prkch	6.69683238063268e-08	0.185715	0.262	0.261	0.00179475
Kcnb1	6.86070779069082e-08	0.119405	0.482	0.48	0.00183867
Efr3b	6.8767693610179e-08	-0.117552	0.797	0.817	0.00184297
Medag	6.92836276253763e-08	0.355135	0.119	0.108	0.0018568
Slc20a2	6.9539449789851e-08	-0.164707	0.248	0.286	0.00186366
Rad52	6.96200236596593e-08	-0.172297	0.213	0.248	0.00186582
Rnf19b	7.01287441800608e-08	-0.154017	0.126	0.152	0.00187945
Ube2a	7.10199574884395e-08	0.123045	0.127	0.134	0.00190333
Cript	7.19932668784324e-08	-0.100795	0.121	0.144	0.00192942
Hdac6	7.25784697182237e-08	-0.160788	0.203	0.236	0.0019451
Myo6	7.65434968493322e-08	-0.107862	0.548	0.593	0.00205137
Dnajc17	7.73509572255148e-08	-0.108455	0.193	0.221	0.00207301
Kif21b	7.76330007696693e-08	-0.13022	0.257	0.294	0.00208056
Pskh1	7.79721824692065e-08	-0.132133	0.197	0.228	0.00208965
Pik3r4	7.811639089803e-08	0.210642	0.173	0.169	0.00209352
Tgfbr3	8.00041771928557e-08	-0.102755	0.359	0.399	0.00214411
Fam104a	8.035241657866e-08	-0.236416	0.201	0.238	0.00215344
Csnk1g2	8.04228930818742e-08	-0.150774	0.166	0.195	0.00215533
Tex50	8.08869153284702e-08	0.124726	0.164	0.17	0.00216777
Pbx3	8.1417302388034e-08	0.209825	0.4	0.39	0.00218198
Gm20635	8.14907420506603e-08	-0.199883	0.11	0.136	0.00218395
Hnrnpa1	8.1893124731529e-08	-0.167215	0.157	0.186	0.00219474
Hjurp	8.22006007428944e-08	0.135401	0.34	0.339	0.00220298
Hexb	8.25536927005413e-08	0.132357	0.233	0.236	0.00221244
Gm12709	8.39498768152436e-08	-0.114043	0.292	0.329	0.00224986
Slc9a5	8.47103359446689e-08	-0.117677	0.196	0.225	0.00227024
Zc3h4	8.51650432709247e-08	-0.176665	0.194	0.228	0.00228242
Acd	8.52445380907378e-08	-0.103217	0.086	0.104	0.00228455
Kctd1	8.63261331407233e-08	-0.158953	0.508	0.553	0.00231354
Irak1	8.63788381595449e-08	-0.143649	0.184	0.216	0.00231495
Tchp	8.66545602849251e-08	-0.259761	0.1	0.126	0.00232234
Fam171a2	8.71583882968075e-08	0.177622	0.122	0.125	0.00233584
Necab2	8.72261289101951e-08	0.271253	0.201	0.198	0.00233766
Plekhh1	8.7909769068149e-08	-0.345587	0.124	0.155	0.00235598
Mcoln1	8.80256525064107e-08	-0.216609	0.134	0.163	0.00235909
Fnta	8.87054499361679e-08	-0.112927	0.244	0.278	0.00237731
Kcnh8	9.04449714752097e-08	0.586542	0.118	0.102	0.00242393
Caln1	9.05353488432058e-08	-0.130916	0.454	0.499	0.00242635
C1galt1c1	9.22573496785165e-08	0.433217	0.119	0.096	0.0024725
Msantd2	9.26068607208638e-08	-0.108453	0.461	0.504	0.00248186
Cmss1	9.28056241031043e-08	0.120086	0.422	0.422	0.00248719
Ttc27	9.32061450929607e-08	-0.116571	0.292	0.328	0.00249792
Cnpy3	9.46221878099562e-08	0.142694	0.209	0.213	0.00253587
Tmtc2	9.57355810573924e-08	-0.126512	0.638	0.68	0.00256571
Rprd1a	9.63641684043335e-08	-0.106091	0.537	0.582	0.00258256
Sema3e	9.66255378526684e-08	0.306435	0.157	0.155	0.00258956
Copz1	9.77760647900749e-08	-0.128456	0.252	0.287	0.0026204
Psd	9.85394392660725e-08	-0.149563	0.199	0.232	0.00264086
Galnt10	9.91645055900979e-08	-0.103483	0.184	0.213	0.00265761
Gm36198	9.95844929528739e-08	0.140989	0.239	0.241	0.00266886
Mttp	1.00502704418733e-07	0.137038	0.407	0.408	0.00269347
Gm15396	1.00847849190836e-07	-0.213938	0.127	0.156	0.00270272
Optn	1.01358415518008e-07	-0.179854	0.272	0.313	0.00271641
Rab43	1.02576959780262e-07	-0.11766	0.221	0.254	0.00274906
Cdc25b	1.02843202496873e-07	-0.183241	0.138	0.166	0.0027562
Enpp2	1.02948011637778e-07	-0.142855	0.247	0.284	0.00275901
Fbxl4	1.04176225983286e-07	-0.147164	0.211	0.244	0.00279192
Dffb	1.05365480846388e-07	-0.103327	0.203	0.232	0.00282379
Neurl1a	1.06102572634047e-07	-0.105662	0.157	0.182	0.00284355
Dlk2	1.0619511204495e-07	-0.137215	0.114	0.137	0.00284603
Nsun5	1.06478447210167e-07	-0.162105	0.102	0.125	0.00285362
Aspscr1	1.07039391182101e-07	-0.176615	0.229	0.265	0.00286866
Ahsa1	1.08838379355045e-07	0.254235	0.234	0.219	0.00291687
Ddo	1.10380802124341e-07	-0.349589	0.078	0.103	0.00295821
Rsf1os2	1.12318918809296e-07	-0.19983	0.136	0.164	0.00301015
Plekho1	1.13989350458416e-07	-0.158655	0.092	0.114	0.00305491
Smyd2	1.14850956736848e-07	-0.139663	0.207	0.24	0.00307801
Gm17494	1.15023320731239e-07	-0.139716	0.21	0.243	0.00308262
Gnptab	1.17094713703231e-07	-0.106947	0.371	0.412	0.00313814
Kcnip1	1.17247968003544e-07	0.15771	0.475	0.49	0.00314225
Dhps	1.21361970530868e-07	0.216501	0.347	0.32	0.0032525
Wdr73	1.23375313501876e-07	-0.131386	0.183	0.213	0.00330646
Sidt2	1.23751916784714e-07	-0.12486	0.228	0.262	0.00331655
Gm39214	1.24536706250388e-07	-0.129586	0.155	0.183	0.00333758
BC002059	1.24922058522984e-07	-0.143254	0.158	0.186	0.00334791
Ckmt1	1.26842329321406e-07	0.108508	0.374	0.379	0.00339937
Dhrs7	1.27030188167529e-07	0.38995	0.109	0.095	0.00340441
Slc16a4	1.27118309419948e-07	-0.149146	0.143	0.169	0.00340677
Gm11417	1.27720785788761e-07	0.185645	0.317	0.307	0.00342292
Gtf2h3	1.27722060218876e-07	-0.126364	0.135	0.16	0.00342295
Map3k20	1.27870542685959e-07	-0.200726	0.182	0.216	0.00342693
2300009A05Rik	1.29106650032156e-07	-0.272236	0.12	0.149	0.00346006
Usf1	1.30022682196272e-07	-0.211455	0.091	0.113	0.00348461
Ddx19a	1.30868982784533e-07	-0.120494	0.131	0.156	0.00350729
Cage1	1.31621082570841e-07	-0.244026	0.105	0.132	0.00352745
Enox2	1.32426326235254e-07	0.178394	0.341	0.349	0.00354903
Aatf	1.33892793195081e-07	-0.13136	0.467	0.512	0.00358833
Nrip1	1.34028377084628e-07	-0.106691	0.271	0.306	0.00359196
C130073E24Rik	1.34856916661522e-07	-0.191012	0.558	0.601	0.00361417
Gm29683	1.35899744044987e-07	-0.273408	0.115	0.144	0.00364211
Ccdc120	1.37547365953085e-07	-0.168608	0.086	0.107	0.00368627
Usp38	1.38737263309485e-07	0.145047	0.237	0.237	0.00371816
Rasgef1a	1.40874418319341e-07	-0.120741	0.479	0.524	0.00377543
Fam53b	1.41358744726483e-07	0.136199	0.176	0.18	0.00378841
Slc39a7	1.41735138018925e-07	0.258351	0.157	0.148	0.0037985
Gm50020	1.42698973985282e-07	-0.304313	0.077	0.101	0.00382433
Seh1l	1.43245761794821e-07	-0.125067	0.104	0.125	0.00383899
Nemp1	1.45020060102865e-07	-0.13513	0.138	0.162	0.00388654
Celsr2	1.45724440497043e-07	0.194825	0.297	0.286	0.00390542
Akap7	1.46372625115793e-07	-0.125043	0.347	0.388	0.00392279
Far2os1	1.47618481302541e-07	-0.204474	0.095	0.118	0.00395618
Shroom2	1.48741416043175e-07	-0.182353	0.095	0.116	0.00398627
Gm17354	1.49392498934178e-07	-0.204951	0.082	0.104	0.00400372
Gm21798	1.50760689931819e-07	0.148859	0.502	0.494	0.00404039
Cdh6	1.52571172788843e-07	0.133398	0.496	0.49	0.00408891
Rhbdd2	1.57816683199711e-07	0.185591	0.27	0.261	0.00422949
Commd4	1.60421855658853e-07	-0.125271	0.126	0.151	0.00429931
Adap1	1.60501746948721e-07	-0.107691	0.366	0.406	0.00430145
Foxj2	1.63127040789959e-07	-0.24122	0.116	0.143	0.0043718
Nefl	1.63506234798414e-07	0.270188	0.235	0.21	0.00438197
Gm42917	1.64052610857551e-07	-0.10422	0.199	0.228	0.00439661
Herpud1	1.65398795404306e-07	0.146007	0.311	0.308	0.00443269
Cat	1.664992650099e-07	-0.204346	0.083	0.105	0.00446218
Aim2	1.68253865891587e-07	-0.109631	0.199	0.228	0.0045092
Rftn1	1.68263762862697e-07	0.121985	0.123	0.133	0.00450947
Gm43597	1.69296176981999e-07	0.169879	0.125	0.127	0.00453714
Gpalpp1	1.69363717888126e-07	-0.218681	0.115	0.143	0.00453895
Lcorl	1.71671919787992e-07	0.128076	0.481	0.501	0.00460081
Itfg2	1.73026502375498e-07	0.152597	0.347	0.34	0.00463711
Uqcrh	1.74367833531828e-07	0.175597	0.264	0.26	0.00467306
Fdps	1.77166349737153e-07	0.368403	0.161	0.136	0.00474806
Cacnb1	1.77277313461788e-07	-0.141212	0.131	0.155	0.00475103
Mfap3l	1.79012603410758e-07	0.114193	0.341	0.34	0.00479754
Nop2	1.80882310559347e-07	0.10012	0.117	0.124	0.00484765
4930565N06Rik	1.81869677832483e-07	-0.143253	0.081	0.1	0.00487411
Sem1	1.81932544570841e-07	-0.162404	0.167	0.198	0.00487579
Hapln4	1.82806925924508e-07	0.364771	0.149	0.131	0.00489923
Nacc1	1.85083690241938e-07	-0.194638	0.152	0.182	0.00496024
F730043M19Rik	1.88394307677371e-07	0.148447	0.318	0.316	0.00504897
Slco2a1	1.94981289634457e-07	0.23714	0.201	0.195	0.0052255
Crot	1.95807854452817e-07	-0.142581	0.245	0.279	0.00524765
Gm9929	1.97216104540984e-07	-0.171639	0.087	0.107	0.00528539
Tnfrsf11a	1.98003770087526e-07	0.125298	0.258	0.261	0.0053065
Ctsf	2.02359849203699e-07	0.134599	0.299	0.298	0.00542324
Aggf1	2.0469033073987e-07	-0.113358	0.17	0.197	0.0054857
Gm11613	2.05310818337393e-07	-0.247773	0.171	0.205	0.00550233
Amotl1	2.0607095756663e-07	0.15578	0.523	0.496	0.0055227
Snx7	2.0607204781476e-07	0.151606	0.182	0.187	0.00552273
Dnaja2	2.06756484257828e-07	0.206092	0.306	0.283	0.00554107
Kcnmb2	2.07347542268289e-07	0.256214	0.345	0.306	0.00555691
Qtrt1	2.0790939937942e-07	0.125848	0.333	0.334	0.00557197
Ache	2.08137015650052e-07	0.118356	0.388	0.387	0.00557807
Rfc2	2.08606831956063e-07	-0.136614	0.173	0.202	0.00559066
Tmem138	2.09992981553986e-07	0.109229	0.174	0.183	0.00562781
Dusp3	2.11281397726809e-07	-0.148237	0.186	0.218	0.00566234
Gm16894	2.13895483734095e-07	-0.158892	0.182	0.212	0.0057324
Ubxn6	2.15424469871113e-07	0.183739	0.182	0.181	0.00577338
Alcam	2.17688747885744e-07	0.161225	0.44	0.435	0.00583406
Gcdh	2.19005417593758e-07	-0.14467	0.134	0.159	0.00586935
Naca	2.19167248355089e-07	0.146538	0.273	0.272	0.00587368
Shox2	2.20645348696229e-07	0.271553	0.224	0.203	0.0059133
Tgoln1	2.21997680351937e-07	0.232468	0.296	0.263	0.00594954
Sntb1	2.22150938949126e-07	0.388664	0.165	0.14	0.00595365
Cic	2.24085115130985e-07	-0.12138	0.176	0.205	0.00600548
Zdhhc5	2.26392344239474e-07	0.105614	0.156	0.164	0.00606731
Tmem265	2.26456580819836e-07	-0.104408	0.182	0.21	0.00606904
Ankfy1	2.270532657595e-07	-0.105618	0.502	0.546	0.00608503
Fhdc1	2.27416728877738e-07	0.224417	0.209	0.199	0.00609477
Mrps24	2.28715151087818e-07	-0.344515	0.092	0.118	0.00612957
Lgi3	2.29606015245752e-07	0.135374	0.369	0.365	0.00615344
Sppl2a	2.29743471194569e-07	0.103683	0.489	0.49	0.00615713
Gm16286	2.31648838257748e-07	0.124986	0.185	0.19	0.00620819
Ufc1	2.32818433367768e-07	0.282278	0.151	0.142	0.00623953
Nudt3	2.32974636105339e-07	-0.114021	0.366	0.406	0.00624372
Gm32618	2.33892375184037e-07	-0.123886	0.086	0.105	0.00626832
Ccdc171	2.36088674151101e-07	-0.24555	0.173	0.207	0.00632718
Gm47710	2.36729777278597e-07	0.332408	0.136	0.122	0.00634436
Kctd13	2.37128506606742e-07	-0.159341	0.137	0.164	0.00635504
Cpne9	2.37610289078981e-07	0.10599	0.502	0.506	0.00636796
4930419G24Rik	2.3795327848252e-07	0.116043	0.442	0.441	0.00637715
5730522E02Rik	2.39579854463774e-07	-0.182965	0.538	0.58	0.00642074
Xpnpep1	2.40010575545816e-07	-0.202752	0.304	0.346	0.00643228
Sv2b	2.41933788351784e-07	0.123396	0.53	0.522	0.00648383
Capns1	2.46817867694542e-07	-0.113211	0.17	0.197	0.00661472
Cope	2.46875432227485e-07	0.100887	0.268	0.273	0.00661626
Prmt8	2.48997547941128e-07	0.197979	0.324	0.311	0.00667313
Vps18	2.49062202601116e-07	-0.193666	0.095	0.117	0.00667487
Ift46	2.49408833762202e-07	-0.104197	0.19	0.217	0.00668416
Ttc28	2.52794554616836e-07	0.109985	0.511	0.524	0.00677489
Elmo2	2.52969685427393e-07	-0.140215	0.228	0.261	0.00677959
Dmac2l	2.53974201382454e-07	-0.204061	0.208	0.244	0.00680651
Gm38155	2.56389448545279e-07	-0.171724	0.093	0.117	0.00687124
Flna	2.58377928606106e-07	-0.192474	0.127	0.153	0.00692453
Tmod1	2.61037778954596e-07	-0.162376	0.098	0.121	0.00699581
Zfp110	2.6199126353131e-07	-0.194086	0.125	0.152	0.00702137
Cdk5rap1	2.62200989153297e-07	-0.208742	0.148	0.179	0.00702699
Pigp	2.66093231789662e-07	0.232804	0.157	0.152	0.0071313
Derl1	2.68028052159814e-07	0.176876	0.248	0.243	0.00718315
Dock1	2.73279204161849e-07	-0.237291	0.108	0.135	0.00732388
Klhl2	2.74341620263766e-07	-0.161767	0.401	0.445	0.00735236
Trir	2.75591209984545e-07	-0.223455	0.141	0.171	0.00738584
Unc5a	2.75911009252311e-07	-0.112443	0.113	0.133	0.00739442
Rpl7l1	2.76779243399502e-07	0.12414	0.199	0.203	0.00741768
Gm26724	2.82053719061374e-07	0.118302	0.425	0.421	0.00755904
Mrps33	2.82898428361645e-07	0.267147	0.149	0.141	0.00758168
Tmem9	2.86285912876226e-07	0.244977	0.239	0.223	0.00767246
Adra1b	2.88086857937436e-07	0.20769	0.321	0.303	0.00772073
Gm27008	2.88306022056695e-07	-0.120552	0.143	0.167	0.0077266
Tmem184c	2.89152404094733e-07	0.224727	0.234	0.222	0.00774928
Ndufa12	2.90267862212499e-07	0.228909	0.242	0.225	0.00777918
Tcea2	2.91416475689403e-07	-0.168518	0.199	0.231	0.00780996
Zfp276	2.94545534735184e-07	-0.215749	0.14	0.17	0.00789382
Cep70	2.94869300270779e-07	-0.100809	0.599	0.642	0.0079025
Kdm5b	2.96732942202482e-07	-0.115112	0.563	0.606	0.00795244
Abcc8	3.03218566992212e-07	0.102005	0.315	0.321	0.00812626
Lrfn1	3.05265777010285e-07	-0.151519	0.205	0.237	0.00818112
Colgalt2	3.13151863447894e-07	0.159266	0.106	0.112	0.00839247
Zfp397	3.19252824232733e-07	0.111198	0.432	0.429	0.00855598
Prdx5	3.20518881036586e-07	0.204784	0.286	0.268	0.00858991
Coq8b	3.22430578719902e-07	-0.12501	0.214	0.246	0.00864114
St3gal2	3.25664732567366e-07	0.147915	0.248	0.249	0.00872781
Aamp	3.25826942204496e-07	0.108578	0.157	0.165	0.00873216
Edrf1	3.31112005428208e-07	-0.118822	0.277	0.312	0.0088738
1110017D15Rik	3.32305487615377e-07	0.208707	0.14	0.139	0.00890579
Myo10	3.35127653587426e-07	-0.143804	0.119	0.144	0.00898142
Vipr2	3.35452781510194e-07	-0.326174	0.195	0.228	0.00899013
Zfp963	3.36100012685998e-07	-0.157867	0.106	0.129	0.00900748
Vamp3	3.37063327570826e-07	-0.220061	0.092	0.116	0.0090333
Mybbp1a	3.37761572710342e-07	-0.213882	0.119	0.146	0.00905201
Tmem255a	3.38256252070284e-07	0.120582	0.251	0.257	0.00906527
Sh3bp5l	3.47401656347868e-07	-0.208132	0.17	0.202	0.00931036
3830406C13Rik	3.50234583409955e-07	0.147501	0.339	0.336	0.00938629
Itgav	3.51280163157509e-07	-0.339209	0.095	0.122	0.00941431
Ugt8a	3.51488040224214e-07	-0.222531	0.087	0.11	0.00941988
Eif1b	3.51705853349998e-07	0.119644	0.193	0.199	0.00942572
Dctn5	3.53280477012345e-07	-0.139951	0.177	0.206	0.00946792
Wdhd1	3.5758215834945e-07	-0.119392	0.104	0.124	0.0095832
Hacd4	3.58185501403426e-07	-0.11669	0.244	0.277	0.00959937
Pde4a	3.61147659320371e-07	-0.103557	0.478	0.519	0.00967876
Akap13	3.61866672699937e-07	0.105456	0.458	0.456	0.00969803
Lsg1	3.63394297770543e-07	0.106925	0.275	0.282	0.00973897
Gm15584	3.66835261433748e-07	-0.113776	0.172	0.198	0.00983119
Dnaaf5	3.67912747011159e-07	-0.157723	0.125	0.15	0.00986006
Tomm34	3.72352136858331e-07	-0.168534	0.184	0.214	0.00997904
Trmt6	3.85824496976104e-07	0.105725	0.294	0.3	0.0103401
Itpr2	3.85995204680877e-07	0.293263	0.203	0.173	0.0103447
Rnf44	3.86609136639576e-07	-0.101355	0.12	0.142	0.0103611
Iqsec3	3.88335740060704e-07	-0.12248	0.469	0.512	0.0104074
Doc2g	3.90334401461204e-07	-0.174157	0.097	0.12	0.010461
Lrtm2	3.95757156765802e-07	0.19281	0.232	0.224	0.0106063
Tmem106b	4.04938999875732e-07	0.178896	0.233	0.226	0.0108524
Rpl26	4.05139974913029e-07	0.127877	0.147	0.153	0.0108578
Eef1b2	4.05215965434811e-07	0.355206	0.153	0.13	0.0108598
Aldh5a1	4.05459049754324e-07	-0.129828	0.112	0.133	0.0108663
Cep63	4.08313978552651e-07	-0.193945	0.181	0.214	0.0109428
Nagk	4.10773350068828e-07	-0.139391	0.344	0.384	0.0110087
Gm16845	4.19390931609857e-07	-0.102124	0.113	0.132	0.0112397
Gm13883	4.22996413647823e-07	-0.204491	0.192	0.226	0.0113363
Sirt5	4.2383515962617e-07	-0.100806	0.292	0.326	0.0113588
Sh3bgrl2	4.2656537840612e-07	0.125743	0.377	0.378	0.011432
Rplp2	4.26936098772296e-07	0.209232	0.109	0.108	0.0114419
Dstn	4.2807462094238e-07	0.118139	0.259	0.265	0.0114724
Rasa4	4.42302438336731e-07	0.16876	0.264	0.263	0.0118537
6230400D17Rik	4.43170529809377e-07	-0.247091	0.093	0.116	0.011877
Sptssb	4.48240774620341e-07	0.282997	0.124	0.115	0.0120129
[truncated: 177 more rows]

## Sheet: TH IN markers
	p_val	avg_log2FC	pct.1	pct.2	p_val_adj	cluster	gene
mm10---Ahi1	1.10751950084577e-183	0.52558	0.994	0.99	2.96815226226667e-179	1	mm10---Ahi1
mm10---Gm26871	1.83074218565924e-168	0.92793	0.715	0.473	4.90638905756677e-164	1	mm10---Gm26871
mm10---Celf4	1.39994693834655e-150	0.617519	0.933	0.834	3.75185779476877e-146	1	mm10---Celf4
mm10---Gm28905	4.39152494413888e-146	0.899385	0.583	0.333	1.17692868502922e-141	1	mm10---Gm28905
mm10---Kctd8	2.33524551754652e-128	0.814548	0.667	0.52	6.25845798702467e-124	1	mm10---Kctd8
mm10---Rtn1	4.57187854678558e-120	0.47074	0.984	0.966	1.22526345053854e-115	1	mm10---Rtn1
mm10---Gabrb1	1.05611877030634e-106	0.521203	0.935	0.828	2.830398304421e-102	1	mm10---Gabrb1
mm10---Baiap3	5.08251005271342e-100	0.595691	0.314	0.109	1.3621126941272e-95	1	mm10---Baiap3
mm10---6330403K07Rik	5.02659480228282e-74	0.44226	0.404	0.219	1.34712740701179e-69	1	mm10---6330403K07Rik
mm10---Fxyd6	2.50078486127901e-73	0.435514	0.288	0.114	6.70210342822773e-69	1	mm10---Fxyd6
mm10---Usp29	1.72995211906646e-71	0.391633	0.95	0.939	4.63627167909812e-67	1	mm10---Usp29
mm10---Scg2	1.30840338277458e-66	0.562243	0.679	0.577	3.50652106583586e-62	1	mm10---Scg2
mm10---Ly6h	2.98150295627219e-66	0.443552	0.724	0.618	7.99042792280947e-62	1	mm10---Ly6h
mm10---Tmem132c	3.92022542585083e-63	0.51842	0.288	0.13	1.05062041412802e-58	1	mm10---Tmem132c
mm10---Resp18	1.74252609789692e-61	0.442269	0.761	0.721	4.66996994236374e-57	1	mm10---Resp18
mm10---Ndst4	8.95852375628353e-60	0.620319	0.39	0.271	2.40088436668399e-55	1	mm10---Ndst4
mm10---Gap43	4.44434528341804e-58	0.373381	0.682	0.577	1.19108453595603e-53	1	mm10---Gap43
mm10---Cdh13	5.11313143672122e-58	0.570016	0.7	0.589	1.37031922504129e-53	1	mm10---Cdh13
mm10---Kcnc2	2.26077854817534e-57	0.451996	0.811	0.705	6.05888650910992e-53	1	mm10---Kcnc2
mm10---Glra3	6.05825176782115e-55	0.437959	0.424	0.269	1.62361147377607e-50	1	mm10---Glra3
mm10---Mgat4c	1.06950572766436e-52	0.544099	0.891	0.852	2.86627535014049e-48	1	mm10---Mgat4c
mm10---Syt16	2.1765643912486e-51	0.375858	0.625	0.473	5.83319256854624e-47	1	mm10---Syt16
mm10---Smyd3	3.04433454142438e-51	0.267091	0.928	0.93	8.15881657101735e-47	1	mm10---Smyd3
mm10---Gnas	2.71193810573657e-49	0.333165	0.819	0.807	7.267994123374e-45	1	mm10---Gnas
mm10---Tmem130	8.24007512968712e-49	0.285314	0.731	0.7	2.20834013475615e-44	1	mm10---Tmem130
mm10---Hap1	1.51800418997712e-46	0.334991	0.371	0.253	4.06825122913867e-42	1	mm10---Hap1
mm10---Nrg1	2.29237851443929e-46	0.349177	0.962	0.925	6.14357441869728e-42	1	mm10---Nrg1
mm10---Cyp51	2.5589856180421e-45	0.305241	0.477	0.401	6.85808145635283e-41	1	mm10---Cyp51
mm10---Agpat4	4.39972006622758e-45	0.326389	0.362	0.229	1.17912497774899e-40	1	mm10---Agpat4
mm10---Caly	1.01833637378519e-44	0.374353	0.633	0.545	2.7291414817443e-40	1	mm10---Caly
mm10---Mir100hg	1.47813072162084e-44	0.291063	0.913	0.89	3.96139033394384e-40	1	mm10---Mir100hg
mm10---Tox	2.03114186032526e-44	0.509734	0.454	0.337	5.4434601856717e-40	1	mm10---Tox
mm10---Tmem132d	1.32311949780841e-43	0.504924	0.317	0.202	3.54596025412653e-39	1	mm10---Tmem132d
mm10---Thsd7b	1.61745212105181e-43	0.532016	0.595	0.489	4.33477168441884e-39	1	mm10---Thsd7b
mm10---Acaca	3.46920859882145e-43	0.197906	0.781	0.806	9.29747904484148e-39	1	mm10---Acaca
mm10---Cdh22	4.60249482008129e-42	0.315518	0.352	0.271	1.23346861178179e-37	1	mm10---Cdh22
mm10---Izumo4	1.24476900494311e-41	0.308748	0.36	0.261	3.33598093324752e-37	1	mm10---Izumo4
mm10---Hmgcr	1.75782028396264e-41	0.297054	0.483	0.41	4.71095836101988e-37	1	mm10---Hmgcr
mm10---Samd4	8.57722613500621e-41	0.288238	0.677	0.623	2.29869660418166e-36	1	mm10---Samd4
mm10---Lsamp	9.48303964422997e-41	0.18184	0.998	0.992	2.54145462465363e-36	1	mm10---Lsamp
mm10---March1	9.9666108387095e-41	0.397282	0.847	0.774	2.67105170477415e-36	1	mm10---March1
mm10---Srebf2	1.78081951544691e-40	0.315053	0.572	0.481	4.77259630139771e-36	1	mm10---Srebf2
mm10---Zfhx3	3.5146031148202e-40	0.442977	0.831	0.777	9.41913634771814e-36	1	mm10---Zfhx3
mm10---Atp2b4	2.71864844872822e-39	0.334147	0.368	0.238	7.28597784259163e-35	1	mm10---Atp2b4
mm10---Fnbp1l	5.85865612478213e-39	0.338323	0.523	0.373	1.57011984144161e-34	1	mm10---Fnbp1l
mm10---Tafa1	1.83735364692632e-38	0.44986	0.525	0.372	4.92410777376253e-34	1	mm10---Tafa1
mm10---Gaa	3.49526279784151e-38	0.283939	0.59	0.529	9.36730429821526e-34	1	mm10---Gaa
mm10---Klhl1	1.11166677010546e-37	0.494057	0.323	0.214	2.97926694388262e-33	1	mm10---Klhl1
mm10---Cdh4	2.28498509860388e-37	0.411878	0.629	0.527	6.1237600642584e-33	1	mm10---Cdh4
mm10---Ldlr	6.93965886629316e-37	0.322871	0.312	0.195	1.85982857616657e-32	1	mm10---Ldlr
mm10---Pgrmc1	9.11312359276307e-37	0.340319	0.468	0.359	2.4423171228605e-32	1	mm10---Pgrmc1
mm10---Syn3	3.62361489089467e-36	0.260119	0.849	0.814	9.71128790759772e-32	1	mm10---Syn3
mm10---Saraf	6.12408328030076e-36	0.273619	0.562	0.504	1.6412543191206e-31	1	mm10---Saraf
mm10---AC149090.1	6.41525592909698e-36	0.260146	0.955	0.948	1.71928858899799e-31	1	mm10---AC149090.1
mm10---Nckap5	1.87144029199707e-35	0.391489	0.525	0.398	5.01545998255215e-31	1	mm10---Nckap5
mm10---Dok6	2.03885103834014e-35	0.254667	0.882	0.889	5.46412078275158e-31	1	mm10---Dok6
mm10---Scai	2.76923965526069e-35	0.194907	0.744	0.756	7.42156227609865e-31	1	mm10---Scai
mm10---Zcchc18	3.40452320766648e-35	0.219368	0.768	0.767	9.12412219654618e-31	1	mm10---Zcchc18
mm10---Itm2b	1.26186897151538e-34	0.254097	0.882	0.898	3.38180884366121e-30	1	mm10---Itm2b
mm10---Dpyd	2.83884304903992e-34	0.397327	0.341	0.252	7.60809937142698e-30	1	mm10---Dpyd
mm10---Sc5d	4.66309090242532e-34	0.266619	0.372	0.282	1.24970836184999e-29	1	mm10---Sc5d
mm10---Nrsn2	4.79424623854875e-34	0.285825	0.42	0.331	1.28485799193106e-29	1	mm10---Nrsn2
mm10---Canx	6.44621971717854e-34	0.190892	0.643	0.655	1.72758688420385e-29	1	mm10---Canx
mm10---Slit1	7.47797618931414e-34	0.305554	0.347	0.251	2.00409761873619e-29	1	mm10---Slit1
mm10---Grb10	2.60830776123644e-33	0.256366	0.702	0.657	6.99026480011366e-29	1	mm10---Grb10
mm10---Tmem91	3.23251797822751e-33	0.284956	0.477	0.388	8.66314818164974e-29	1	mm10---Tmem91
mm10---Pcyt2	8.13544114409026e-33	0.237419	0.732	0.719	2.18029822661619e-28	1	mm10---Pcyt2
mm10---Aplp1	9.04430068019106e-33	0.263571	0.635	0.58	2.4238725822912e-28	1	mm10---Aplp1
mm10---Tecr	1.73166900180821e-32	0.233561	0.95	0.951	4.64087292484601e-28	1	mm10---Tecr
mm10---Pgap1	2.7359938527738e-32	0.267155	0.471	0.397	7.33246352543378e-28	1	mm10---Pgap1
mm10---Sergef	3.04080272774371e-32	0.209653	0.538	0.516	8.14935131035314e-28	1	mm10---Sergef
mm10---Zkscan16	4.91993667846106e-32	0.272749	0.467	0.383	1.31854302982756e-27	1	mm10---Zkscan16
mm10---Zbtb20	7.14959183555019e-32	0.217789	0.843	0.86	1.91609061192745e-27	1	mm10---Zbtb20
mm10---Ncam1	1.04584190477466e-31	0.177948	0.966	0.976	2.80285630479608e-27	1	mm10---Ncam1
mm10---Kirrel3	1.85007279046047e-31	0.313783	0.867	0.811	4.95819507843407e-27	1	mm10---Kirrel3
mm10---Zfp618	3.32387812477648e-31	0.198226	0.478	0.458	8.90799337440097e-27	1	mm10---Zfp618
mm10---Fstl4	7.61589431588422e-31	0.295649	0.436	0.42	2.04105967665697e-26	1	mm10---Fstl4
mm10---Inpp4a	8.21494391559568e-31	0.100074	0.546	0.594	2.20160496937964e-26	1	mm10---Inpp4a
mm10---Mical3	1.02499510043048e-30	0.134653	0.762	0.801	2.74698686915369e-26	1	mm10---Mical3
mm10---Gucy1a2	1.36537006536975e-30	0.161357	0.816	0.848	3.65919177519093e-26	1	mm10---Gucy1a2
mm10---Rnf25	1.51991320333777e-30	0.16384	0.465	0.461	4.07336738494524e-26	1	mm10---Rnf25
mm10---Rab27b	1.60416541914048e-30	0.262898	0.423	0.357	4.2991633232965e-26	1	mm10---Rab27b
mm10---Gm32647	3.16086017866896e-30	0.617334	0.582	0.502	8.47110527883281e-26	1	mm10---Gm32647
mm10---Kcnq3	4.22023523231855e-30	0.230079	0.776	0.672	1.13102304226137e-25	1	mm10---Kcnq3
mm10---Olfm2	4.67048839702025e-30	0.203594	0.528	0.507	1.25169089040143e-25	1	mm10---Olfm2
mm10---Arl6ip1	4.87369100998506e-30	0.272078	0.678	0.638	1.306149190676e-25	1	mm10---Arl6ip1
mm10---Atp6v0c	6.95073711815759e-30	0.249984	0.911	0.908	1.86279754766623e-25	1	mm10---Atp6v0c
mm10---4632427E13Rik	6.97751432202421e-30	0.195717	0.767	0.768	1.86997383830249e-25	1	mm10---4632427E13Rik
mm10---Pvt1	7.86708571324573e-30	0.258017	0.547	0.503	2.10837897114986e-25	1	mm10---Pvt1
mm10---Dzank1	9.77009166313904e-30	0.1873	0.693	0.693	2.61838456572126e-25	1	mm10---Dzank1
mm10---Fstl5	2.5428269977165e-29	0.375079	0.641	0.62	6.81477635388023e-25	1	mm10---Fstl5
mm10---Gpm6a	2.66495371316075e-29	0.228838	0.866	0.849	7.14207595127082e-25	1	mm10---Gpm6a
mm10---Sqle	3.64125431078491e-29	0.241578	0.28	0.19	9.75856155290355e-25	1	mm10---Sqle
mm10---Gm36975	3.64756386687168e-29	0.203456	0.701	0.71	9.7754711632161e-25	1	mm10---Gm36975
mm10---Ip6k1	4.02180871969559e-29	0.116378	0.624	0.663	1.07784473687842e-24	1	mm10---Ip6k1
mm10---Cd81	4.85087809682803e-29	0.267162	0.656	0.614	1.30003532994991e-24	1	mm10---Cd81
mm10---Gng2	5.683304902003e-29	0.236605	0.503	0.445	1.52312571373681e-24	1	mm10---Gng2
mm10---Fndc3a	8.55901382355774e-29	0.204735	0.592	0.586	2.29381570471347e-24	1	mm10---Fndc3a
mm10---Ate1	1.02344221832072e-28	0.194561	0.605	0.577	2.74282514509953e-24	1	mm10---Ate1
mm10---Arhgef28	1.09379454292837e-28	0.252855	0.263	0.164	2.93136937504802e-24	1	mm10---Arhgef28
mm10---Msmo1	1.67908491056005e-28	0.259633	0.34	0.256	4.49994756030093e-24	1	mm10---Msmo1
mm10---Tro	2.375476963313e-28	0.194863	0.697	0.694	6.36627826167883e-24	1	mm10---Tro
mm10---Alcam	3.65777563022776e-28	0.347216	0.643	0.585	9.80283868901039e-24	1	mm10---Alcam
mm10---Slc22a17	4.11766192250379e-28	0.169251	0.834	0.863	1.10353339523102e-23	1	mm10---Slc22a17
mm10---Cacng3	4.72674049004061e-28	0.306286	0.436	0.341	1.26676645133088e-23	1	mm10---Cacng3
mm10---Kcnd2	5.68139117904971e-28	0.200221	0.964	0.93	1.52261283598532e-23	1	mm10---Kcnd2
mm10---Prickle2	6.0215313264708e-28	0.203715	0.751	0.749	1.61377039549417e-23	1	mm10---Prickle2
mm10---Stat5b	7.16000697668772e-28	0.158862	0.455	0.461	1.91888186975231e-23	1	mm10---Stat5b
mm10---Tspan7	9.78589613571538e-28	0.204358	0.868	0.878	2.62262016437172e-23	1	mm10---Tspan7
mm10---Srsf7	1.03129081402465e-27	0.181457	0.817	0.823	2.76385938158605e-23	1	mm10---Srsf7
mm10---Rbm39	1.07979659857747e-27	0.16929	0.975	0.983	2.89385488418761e-23	1	mm10---Rbm39
mm10---Faim2	1.6059282098503e-27	0.117749	0.654	0.704	4.30388760239881e-23	1	mm10---Faim2
mm10---Scd2	1.79073775042348e-27	0.125988	0.504	0.537	4.79917717113494e-23	1	mm10---Scd2
mm10---Bbs9	2.0102405974935e-27	0.215929	0.494	0.458	5.38744480128258e-23	1	mm10---Bbs9
mm10---Mrpl38	2.16099685880299e-27	0.105377	0.327	0.349	5.791471581592e-23	1	mm10---Mrpl38
mm10---Epha6	2.93277939606362e-27	0.340257	0.84	0.796	7.85984878145051e-23	1	mm10---Epha6
mm10---Prmt2	3.15774902695696e-27	0.223207	0.295	0.222	8.46276739224465e-23	1	mm10---Prmt2
mm10---Ftx	6.75497279065882e-27	0.19352	0.845	0.836	1.81033270789656e-22	1	mm10---Ftx
mm10---Scg5	8.1290728780129e-27	0.217771	0.924	0.928	2.17859153130746e-22	1	mm10---Scg5
mm10---Sesn1	1.0862817733652e-26	0.156298	0.55	0.564	2.91123515261873e-22	1	mm10---Sesn1
mm10---Hspa5	1.1346221994227e-26	0.16022	0.582	0.602	3.04078749445285e-22	1	mm10---Hspa5
mm10---Wsb1	2.44956456653386e-26	0.145704	0.599	0.617	6.56483303831075e-22	1	mm10---Wsb1
mm10---Ablim3	4.79290859904649e-26	0.235183	0.485	0.422	1.28449950454446e-21	1	mm10---Ablim3
mm10---Cst3	6.19680854990443e-26	0.238889	0.524	0.493	1.66074469137439e-21	1	mm10---Cst3
mm10---Supt20	6.86272610424327e-26	0.148804	0.503	0.514	1.8392105959372e-21	1	mm10---Supt20
mm10---Sgsm1	7.78391138792592e-26	0.120009	0.517	0.539	2.08608825196415e-21	1	mm10---Sgsm1
mm10---Tmem59l	8.1294518508311e-26	0.192552	0.68	0.681	2.17869309602273e-21	1	mm10---Tmem59l
mm10---Fth1	1.01544288448021e-25	0.138926	0.494	0.525	2.72138693040695e-21	1	mm10---Fth1
mm10---Slc50a1	1.09825345665669e-25	0.108364	0.415	0.438	2.94331926383992e-21	1	mm10---Slc50a1
mm10---Sdk1	1.45539772656607e-25	0.382088	0.674	0.643	3.90046590719707e-21	1	mm10---Sdk1
mm10---Pdzd4	1.74726223654009e-25	0.120545	0.616	0.647	4.68266279392744e-21	1	mm10---Pdzd4
mm10---Lrp8	1.89724598834928e-25	0.103707	0.485	0.524	5.08461924877606e-21	1	mm10---Lrp8
mm10---Clu	2.08906784526048e-25	0.158406	0.434	0.439	5.59870182529808e-21	1	mm10---Clu
mm10---Gm33228	2.15570626618115e-25	0.288767	0.312	0.215	5.77729279336547e-21	1	mm10---Gm33228
mm10---Hmgcs1	2.49434131904578e-25	0.222	0.311	0.244	6.68483473504268e-21	1	mm10---Hmgcs1
mm10---Copg2	2.5241978980055e-25	0.140005	0.655	0.673	6.76485036665475e-21	1	mm10---Copg2
mm10---Syt4	2.55693719243306e-25	0.247817	0.55	0.505	6.8525916757206e-21	1	mm10---Syt4
mm10---Rprd2	2.61299077526377e-25	0.142684	0.586	0.599	7.0028152777069e-21	1	mm10---Rprd2
mm10---Cadps2	3.14704579225397e-25	0.463016	0.377	0.277	8.43408272324065e-21	1	mm10---Cadps2
mm10---Sybu	3.24381344332711e-25	0.211779	0.9	0.876	8.69342002811667e-21	1	mm10---Sybu
mm10---Dzip3	3.66059223105739e-25	0.119189	0.69	0.725	9.81038717923381e-21	1	mm10---Dzip3
mm10---Gabbr1	3.98101905119253e-25	0.161878	0.687	0.696	1.0669131057196e-20	1	mm10---Gabbr1
mm10---Catspere2	4.24921126060973e-25	0.206293	0.564	0.537	1.13878861784341e-20	1	mm10---Catspere2
mm10---Atp6ap2	4.49966197651181e-25	0.159041	0.654	0.672	1.20590940970517e-20	1	mm10---Atp6ap2
mm10---Pacs1	4.87450479920806e-25	0.156503	0.701	0.717	1.30636728618776e-20	1	mm10---Pacs1
mm10---Serinc1	5.25951656903727e-25	0.188076	0.68	0.678	1.40955044050199e-20	1	mm10---Serinc1
mm10---Npdc1	5.8317213644323e-25	0.173563	0.481	0.468	1.56290132566786e-20	1	mm10---Npdc1
mm10---Acsl3	5.90453009900945e-25	0.206356	0.428	0.383	1.58241406653453e-20	1	mm10---Acsl3
mm10---Sqstm1	6.01344929871375e-25	0.137922	0.561	0.581	1.61160441205529e-20	1	mm10---Sqstm1
mm10---Abi2	6.1780267943008e-25	0.101162	0.601	0.636	1.65571118087262e-20	1	mm10---Abi2
mm10---Rfx3	6.51566513808276e-25	0.128286	0.567	0.588	1.74619825700618e-20	1	mm10---Rfx3
mm10---Srsf10	7.25494265360519e-25	0.15729	0.497	0.495	1.94432463116619e-20	1	mm10---Srsf10
mm10---Elovl6	8.27514145808367e-25	0.118569	0.595	0.62	2.21773791076642e-20	1	mm10---Elovl6
mm10---Htr4	9.24071980229241e-25	0.192795	0.53	0.528	2.47651290701437e-20	1	mm10---Htr4
mm10---Traf3ip2	1.50941261846515e-24	0.119552	0.406	0.425	4.0452258174866e-20	1	mm10---Traf3ip2
mm10---Disp2	1.65043730505755e-24	0.14228	0.579	0.592	4.42317197755424e-20	1	mm10---Disp2
mm10---Galnt16	1.86641831945923e-24	0.141506	0.472	0.483	5.00200109615075e-20	1	mm10---Galnt16
mm10---Usp11	2.32891703900362e-24	0.212592	0.36	0.296	6.2414976645297e-20	1	mm10---Usp11
mm10---Slc25a23	2.42235806124972e-24	0.141676	0.559	0.576	6.49191960414924e-20	1	mm10---Slc25a23
mm10---Phlpp2	2.4983181464178e-24	0.164437	0.453	0.438	6.69549263239972e-20	1	mm10---Phlpp2
mm10---Araf	3.07255061048352e-24	0.176699	0.577	0.57	8.23443563609584e-20	1	mm10---Araf
mm10---Sema6d	3.0797413373979e-24	0.165028	0.778	0.668	8.25370678422638e-20	1	mm10---Sema6d
mm10---Lcorl	3.89199154668298e-24	0.176465	0.527	0.53	1.04305373451104e-19	1	mm10---Lcorl
mm10---Bsg	3.9272941815292e-24	0.219916	0.818	0.81	1.05251484064983e-19	1	mm10---Bsg
mm10---Fdft1	3.94042920512965e-24	0.213972	0.339	0.275	1.05603502697475e-19	1	mm10---Fdft1
mm10---Nell1	4.58391932917641e-24	0.382021	0.687	0.616	1.22849038021928e-19	1	mm10---Nell1
mm10---Slc16a11	5.64304987412391e-24	0.23981	0.333	0.261	1.51233736626521e-19	1	mm10---Slc16a11
mm10---Cenpc1	6.90095129508522e-24	0.113455	0.464	0.484	1.84945494708284e-19	1	mm10---Cenpc1
mm10---Taf1	7.12993261790971e-24	0.122868	0.493	0.517	1.9108219415998e-19	1	mm10---Taf1
mm10---Syt11	7.78559896755074e-24	0.14747	0.75	0.775	2.0865405233036e-19	1	mm10---Syt11
mm10---Tulp4	9.08285335696219e-24	0.159687	0.745	0.747	2.43420469966587e-19	1	mm10---Tulp4
mm10---Reep5	9.11439403678811e-24	0.150605	0.499	0.505	2.44265760185921e-19	1	mm10---Reep5
mm10---Stag2	1.20758581842911e-23	0.143976	0.496	0.508	3.23632999339002e-19	1	mm10---Stag2
mm10---Cyld	1.43846700843156e-23	0.166512	0.584	0.578	3.85509158259659e-19	1	mm10---Cyld
mm10---B230209E15Rik	1.69835751314518e-23	0.210888	0.377	0.324	4.55159813522907e-19	1	mm10---B230209E15Rik
mm10---Senp7	1.91174214147406e-23	0.107712	0.644	0.674	5.12346893915049e-19	1	mm10---Senp7
mm10---Ogfod1	2.07235413884991e-23	0.13455	0.462	0.469	5.55390909211775e-19	1	mm10---Ogfod1
mm10---1500004A13Rik	2.1036063584634e-23	0.11942	0.754	0.788	5.63766504068191e-19	1	mm10---1500004A13Rik
mm10---Uba6	2.18414591690692e-23	0.119135	0.424	0.434	5.85351105731056e-19	1	mm10---Uba6
mm10---Gm26691	2.28072018728401e-23	0.23649	0.644	0.617	6.11233010192115e-19	1	mm10---Gm26691
mm10---Ccdc82	2.42857721950271e-23	0.213286	0.397	0.35	6.50858694826727e-19	1	mm10---Ccdc82
mm10---Slc12a6	2.61390588369706e-23	0.123232	0.586	0.604	7.00526776830813e-19	1	mm10---Slc12a6
mm10---Pld3	2.92394796742888e-23	0.168328	0.431	0.41	7.8361805527094e-19	1	mm10---Pld3
mm10---Zwint	3.33756154111947e-23	0.14396	0.63	0.642	8.94466493020019e-19	1	mm10---Zwint
mm10---Igsf8	3.35052307765487e-23	0.205753	0.541	0.511	8.97940184811506e-19	1	mm10---Igsf8
mm10---Usp9x	3.95913989782294e-23	0.115574	0.71	0.741	1.06104949261655e-18	1	mm10---Usp9x
mm10---Eif1	4.46175273868633e-23	0.125989	0.417	0.434	1.19574973396794e-18	1	mm10---Eif1
mm10---Cobl	4.89506108869871e-23	0.23563	0.517	0.44	1.31187637177125e-18	1	mm10---Cobl
mm10---Uchl1	4.90994935195197e-23	0.131225	0.395	0.397	1.31586642632313e-18	1	mm10---Uchl1
mm10---Epn2	4.95559977382132e-23	0.155553	0.462	0.453	1.32810073938411e-18	1	mm10---Epn2
mm10---Abr	5.47220275687328e-23	0.132403	0.762	0.788	1.46655033884204e-18	1	mm10---Abr
mm10---8030451O07Rik	6.26757415360785e-23	0.192066	0.389	0.374	1.6797098731669e-18	1	mm10---8030451O07Rik
mm10---Ssr1	6.40474809969709e-23	0.178244	0.322	0.285	1.71647249071882e-18	1	mm10---Ssr1
mm10---Luzp2	7.21253836188709e-23	0.326113	0.712	0.7	1.93296028098574e-18	1	mm10---Luzp2
mm10---Rassf8	7.5997484968658e-23	0.144828	0.35	0.343	2.03673259716004e-18	1	mm10---Rassf8
mm10---Pebp1	9.18874486993252e-23	0.103756	0.465	0.498	2.46258362514192e-18	1	mm10---Pebp1
mm10---Gm48742	9.61572457264785e-23	0.224679	0.32	0.269	2.57701418546962e-18	1	mm10---Gm48742
mm10---Nol4l	9.72063274772182e-23	0.114407	0.471	0.496	2.60512957638945e-18	1	mm10---Nol4l
mm10---Basp1	1.01131498422328e-22	0.192023	0.575	0.553	2.7103241577184e-18	1	mm10---Basp1
mm10---Zfpm2	1.05297224548666e-22	0.102034	0.604	0.662	2.82196561790425e-18	1	mm10---Zfpm2
mm10---2210408I21Rik	1.06260347191803e-22	0.115017	0.675	0.711	2.84777730474031e-18	1	mm10---2210408I21Rik
mm10---Tut4	1.09524246776841e-22	0.120448	0.72	0.748	2.93524981361935e-18	1	mm10---Tut4
mm10---Gm12940	1.11560852269976e-22	0.101406	0.388	0.405	2.98983084083536e-18	1	mm10---Gm12940
mm10---Ubb	1.43968660450823e-22	0.121002	0.434	0.454	3.85836010008206e-18	1	mm10---Ubb
mm10---Ubxn4	1.48642758575719e-22	0.11674	0.65	0.676	3.98362592982926e-18	1	mm10---Ubxn4
mm10---Gm11149	1.56381243028464e-22	0.177052	0.463	0.445	4.19101731316284e-18	1	mm10---Gm11149
mm10---Dtd1	1.67458989709356e-22	0.154558	0.675	0.681	4.48790092421075e-18	1	mm10---Dtd1
mm10---Ptbp2	1.90009979778795e-22	0.103269	0.511	0.533	5.09226745807171e-18	1	mm10---Ptbp2
mm10---Erp29	1.97741549497944e-22	0.174257	0.378	0.352	5.29947352654489e-18	1	mm10---Erp29
mm10---Rabac1	2.01258652967559e-22	0.195118	0.573	0.557	5.39373189953057e-18	1	mm10---Rabac1
mm10---Brinp1	2.48725697346378e-22	0.216881	0.815	0.814	6.66584868888294e-18	1	mm10---Brinp1
mm10---Pfkfb4	2.50827380881799e-22	0.125307	0.343	0.345	6.72217380763221e-18	1	mm10---Pfkfb4
mm10---Ptprn	2.94664827845849e-22	0.120755	0.745	0.777	7.89701738626877e-18	1	mm10---Ptprn
mm10---4930447C04Rik	4.05144192941263e-22	0.215661	0.461	0.446	1.08578643708258e-17	1	mm10---4930447C04Rik
mm10---Tenm1	4.26248218835349e-22	0.279752	0.803	0.753	1.14234522647874e-17	1	mm10---Tenm1
mm10---B4gat1	4.29165807862925e-22	0.120462	0.323	0.327	1.15016436507264e-17	1	mm10---B4gat1
mm10---Vat1l	4.96103180394936e-22	0.251048	0.526	0.439	1.32955652345843e-17	1	mm10---Vat1l
mm10---Ptgds	5.7147134052601e-22	0.286025	0.516	0.493	1.53154319260971e-17	1	mm10---Ptgds
mm10---Gm20721	5.93877733034907e-22	0.13519	0.276	0.264	1.59159232453355e-17	1	mm10---Gm20721
mm10---2700054A10Rik	6.42225256805617e-22	0.178928	0.332	0.306	1.72116368823905e-17	1	mm10---2700054A10Rik
mm10---Atp8a1	6.9178858630615e-22	0.196166	0.733	0.698	1.85399341130048e-17	1	mm10---Atp8a1
mm10---Nap1l5	6.97520069220471e-22	0.16457	0.544	0.536	1.86935378551086e-17	1	mm10---Nap1l5
mm10---Gm19522	7.10491397367866e-22	0.224679	0.288	0.22	1.90411694494588e-17	1	mm10---Gm19522
mm10---Slc6a7	7.77254468501851e-22	0.132833	0.436	0.445	2.08304197558496e-17	1	mm10---Slc6a7
mm10---Cers4	7.88346694709529e-22	0.157992	0.595	0.589	2.11276914182154e-17	1	mm10---Cers4
mm10---Tmed4	8.11858827436063e-22	0.119654	0.285	0.284	2.17578165752865e-17	1	mm10---Tmed4
mm10---Pabpn1	8.17095522141124e-22	0.107292	0.505	0.531	2.18981599933821e-17	1	mm10---Pabpn1
mm10---Rpl6	8.68184269945686e-22	0.109007	0.38	0.393	2.32673384345444e-17	1	mm10---Rpl6
mm10---Gabrg3	9.2830887739394e-22	0.225357	0.874	0.797	2.48786779141576e-17	1	mm10---Gabrg3
mm10---Grina	1.27783844318564e-21	0.101398	0.629	0.67	3.42460702773751e-17	1	mm10---Grina
mm10---Dapk1	1.31901062384069e-21	0.225519	0.566	0.507	3.53494847189304e-17	1	mm10---Dapk1
mm10---Atpif1	1.45941225274543e-21	0.109257	0.518	0.546	3.91122483735775e-17	1	mm10---Atpif1
mm10---Pdzrn4	1.63184899305947e-21	0.287705	0.78	0.734	4.37335530139938e-17	1	mm10---Pdzrn4
mm10---Zfp612	1.76288398544883e-21	0.163073	0.544	0.531	4.72452908100287e-17	1	mm10---Zfp612
mm10---Ankrd6	1.85172500599833e-21	0.226965	0.374	0.302	4.96262301607551e-17	1	mm10---Ankrd6
mm10---Tmem9	1.95012598356809e-21	0.118235	0.258	0.248	5.22633763596248e-17	1	mm10---Tmem9
mm10---Kantr	2.14256871922309e-21	0.142725	0.529	0.532	5.74208416751787e-17	1	mm10---Kantr
mm10---Arid4b	2.3751812161357e-21	0.133176	0.778	0.799	6.36548565924367e-17	1	mm10---Arid4b
mm10---Ldlrad4	2.46577016522243e-21	0.132196	0.601	0.628	6.60826404279611e-17	1	mm10---Ldlrad4
mm10---Mboat7	2.52226752674471e-21	0.163844	0.336	0.299	6.75967697167582e-17	1	mm10---Mboat7
mm10---Pgm2l1	2.56889230247982e-21	0.152621	0.35	0.332	6.88463137064593e-17	1	mm10---Pgm2l1
mm10---Vamp4	2.90558467804487e-21	0.141319	0.435	0.429	7.78696693716025e-17	1	mm10---Vamp4
mm10---Cers5	2.91337231343643e-21	0.133103	0.49	0.495	7.80783780000962e-17	1	mm10---Cers5
mm10---Rbm5	2.9663755153908e-21	0.121696	0.781	0.801	7.94988638124734e-17	1	mm10---Rbm5
mm10---Prnp	3.29002738392057e-21	0.179995	0.442	0.413	8.81727338890714e-17	1	mm10---Prnp
mm10---Zfp941	3.38561219470346e-21	0.146338	0.445	0.438	9.07344068180528e-17	1	mm10---Zfp941
mm10---H13	3.63133650883403e-21	0.120337	0.39	0.396	9.7319818436752e-17	1	mm10---H13
mm10---Serpine2	4.49811124381734e-21	0.254896	0.296	0.214	1.20549381334305e-16	1	mm10---Serpine2
mm10---Slc35f3	5.64146305756138e-21	0.109182	0.497	0.535	1.51191209942645e-16	1	mm10---Slc35f3
mm10---5730522E02Rik	6.72884831935136e-21	0.235116	0.591	0.571	1.80333134958616e-16	1	mm10---5730522E02Rik
mm10---Zbtb11	7.47496861613826e-21	0.100058	0.571	0.607	2.00329158912505e-16	1	mm10---Zbtb11
mm10---Pou2f2	1.00695542878258e-20	0.150906	0.267	0.258	2.69864054913731e-16	1	mm10---Pou2f2
mm10---Nrg3os	1.04308452613678e-20	0.172869	0.926	0.943	2.79546653004658e-16	1	mm10---Nrg3os
mm10---Bscl2	1.07990301353204e-20	0.113371	0.473	0.488	2.89414007626588e-16	1	mm10---Bscl2
mm10---Astn1	1.19897489942661e-20	0.110419	0.784	0.819	3.2132527304633e-16	1	mm10---Astn1
mm10---Fam120c	1.23967311969697e-20	0.122507	0.492	0.5	3.32232396078789e-16	1	mm10---Fam120c
mm10---Ldb2	1.32875337564227e-20	0.24972	0.532	0.516	3.56105904672128e-16	1	mm10---Ldb2
mm10---Bcap31	2.37133210687232e-20	0.120519	0.358	0.362	6.35517004641782e-16	1	mm10---Bcap31
mm10---Gm10785	2.44160297923372e-20	0.107574	0.528	0.552	6.54349598434637e-16	1	mm10---Gm10785
mm10---Prxl2c	2.49677458930977e-20	0.123005	0.498	0.508	6.69135589935019e-16	1	mm10---Prxl2c
mm10---Kcnk2	2.53380460471465e-20	0.232644	0.25	0.182	6.79059634063526e-16	1	mm10---Kcnk2
mm10---Tm2d3	2.67854448579795e-20	0.154851	0.382	0.374	7.17849922193852e-16	1	mm10---Tm2d3
mm10---Ptprj	3.02746570901934e-20	0.153345	0.666	0.672	8.11360810017182e-16	1	mm10---Ptprj
mm10---Dpysl5	3.51428614455091e-20	0.169795	0.394	0.361	9.41828686739644e-16	1	mm10---Dpysl5
mm10---Ptpn5	4.00709267681023e-20	0.127888	0.625	0.635	1.07390083738514e-15	1	mm10---Ptpn5
mm10---Psap	4.05536461833637e-20	0.123118	0.784	0.821	1.08683771771415e-15	1	mm10---Psap
mm10---9630014M24Rik	4.73829477073015e-20	0.149837	0.532	0.558	1.26986299855568e-15	1	mm10---9630014M24Rik
mm10---Zfhx4	5.36747545318761e-20	0.244558	0.694	0.656	1.43848342145428e-15	1	mm10---Zfhx4
mm10---Slc9a9	5.85302053281353e-20	0.186213	0.592	0.57	1.56860950279403e-15	1	mm10---Slc9a9
mm10---Vezt	6.76228944934964e-20	0.109826	0.591	0.604	1.8122935724257e-15	1	mm10---Vezt
mm10---Sh3rf1	7.62259843478728e-20	0.195007	0.454	0.43	2.04285638052299e-15	1	mm10---Sh3rf1
mm10---Clk1	8.10010404943539e-20	0.115031	0.613	0.636	2.17082788524869e-15	1	mm10---Clk1
mm10---Erlec1	8.13121631065235e-20	0.104314	0.517	0.537	2.17916597125483e-15	1	mm10---Erlec1
mm10---Ddx5	8.66424200666846e-20	0.153288	0.799	0.796	2.32201685778715e-15	1	mm10---Ddx5
mm10---Gpm6b	9.03147678112563e-20	0.164147	0.514	0.508	2.42043577734167e-15	1	mm10---Gpm6b
mm10---Tmed9	1.09264800611088e-19	0.110577	0.457	0.474	2.92829665637715e-15	1	mm10---Tmed9
mm10---Robo1	1.14345011878068e-19	0.232779	0.897	0.906	3.06444631833221e-15	1	mm10---Robo1
mm10---Frg1	1.34524892814831e-19	0.112566	0.35	0.359	3.60526712743748e-15	1	mm10---Frg1
mm10---Celf5	1.35440910292708e-19	0.160286	0.339	0.312	3.62981639584456e-15	1	mm10---Celf5
mm10---Epb41l4b	1.47478892466971e-19	0.147741	0.579	0.579	3.95243431811481e-15	1	mm10---Epb41l4b
mm10---Pdia6	1.48667855592836e-19	0.143379	0.356	0.348	3.98429852988799e-15	1	mm10---Pdia6
mm10---Smim14	1.61450731539561e-19	0.140963	0.768	0.787	4.32687960526024e-15	1	mm10---Smim14
mm10---Dhcr24	1.62983166821455e-19	0.194095	0.263	0.192	4.367948870815e-15	1	mm10---Dhcr24
mm10---Gm39469	1.71640892213055e-19	0.111529	0.388	0.386	4.59997591130988e-15	1	mm10---Gm39469
mm10---Tusc3	1.89115917160079e-19	0.122329	0.648	0.669	5.06830657989012e-15	1	mm10---Tusc3
mm10---Ankrd44	1.92559424247041e-19	0.188478	0.522	0.5	5.16059256982069e-15	1	mm10---Ankrd44
mm10---Elavl2	2.14239661864019e-19	0.218649	0.821	0.822	5.74162293795572e-15	1	mm10---Elavl2
mm10---Hnrnpr	2.16781096894397e-19	0.102584	0.627	0.657	5.80973339676984e-15	1	mm10---Hnrnpr
mm10---Pcnx	2.17169946830613e-19	0.131552	0.484	0.483	5.82015457506042e-15	1	mm10---Pcnx
mm10---Asxl3	2.18062901465968e-19	0.114583	0.393	0.404	5.84408575928794e-15	1	mm10---Asxl3
mm10---March8	2.29844967734542e-19	0.100374	0.316	0.322	6.15984513528573e-15	1	mm10---March8
mm10---Chd5	2.91962148525913e-19	0.130241	0.462	0.465	7.82458558049447e-15	1	mm10---Chd5
mm10---5330417C22Rik	3.31412545334102e-19	0.154493	0.628	0.631	8.88185621495394e-15	1	mm10---5330417C22Rik
mm10---Fbxo10	3.66624950157509e-19	0.104237	0.382	0.393	9.82554866422123e-15	1	mm10---Fbxo10
mm10---Cd47	4.10806217968991e-19	0.110874	0.604	0.626	1.10096066415689e-14	1	mm10---Cd47
mm10---Scfd1	4.64168244263815e-19	0.102753	0.471	0.489	1.24397089462702e-14	1	mm10---Scfd1
mm10---Rhbdd2	4.8658898942095e-19	0.146938	0.265	0.242	1.30405849164815e-14	1	mm10---Rhbdd2
mm10---Nalcn	5.01865867271854e-19	0.154955	0.89	0.885	1.34500052428857e-14	1	mm10---Nalcn
mm10---Arfgef3	5.31671082859185e-19	0.111674	0.689	0.711	1.42487850206262e-14	1	mm10---Arfgef3
mm10---Ctsb	5.45222569751384e-19	0.101765	0.601	0.626	1.46119648693371e-14	1	mm10---Ctsb
mm10---Tmx4	7.47867320986905e-19	0.16811	0.753	0.747	2.00428442024491e-14	1	mm10---Tmx4
mm10---Xrn1	7.88204541312209e-19	0.125298	0.732	0.749	2.11238817071672e-14	1	mm10---Xrn1
mm10---Amn1	8.66523300519048e-19	0.123481	0.337	0.34	2.32228244539105e-14	1	mm10---Amn1
mm10---Hsp90b1	8.85166284390629e-19	0.149783	0.568	0.565	2.37224564216689e-14	1	mm10---Hsp90b1
mm10---Os9	1.19422284709038e-18	0.119634	0.389	0.392	3.20051723020223e-14	1	mm10---Os9
mm10---Dgkg	1.21725967004634e-18	0.154804	0.519	0.507	3.2622559157242e-14	1	mm10---Dgkg
mm10---Rsrc2	1.25130144104167e-18	0.108747	0.577	0.601	3.35348786199167e-14	1	mm10---Rsrc2
mm10---Ece1	1.29860963572096e-18	0.120662	0.251	0.235	3.48027382373218e-14	1	mm10---Ece1
mm10---Vgf	1.40253259582363e-18	0.29778	0.299	0.242	3.75878735680732e-14	1	mm10---Vgf
mm10---Camkmt	1.42187128316155e-18	0.132467	0.644	0.661	3.81061503887295e-14	1	mm10---Camkmt
mm10---Eml6	1.44007299516018e-18	0.13597	0.872	0.885	3.85939562702928e-14	1	mm10---Eml6
mm10---4930555F03Rik	1.54420014768672e-18	0.259572	0.602	0.575	4.1384563958004e-14	1	mm10---4930555F03Rik
mm10---Syt13	1.590911931908e-18	0.139472	0.386	0.375	4.26364397751343e-14	1	mm10---Syt13
mm10---Mpp7	1.59835704887624e-18	0.124441	0.522	0.535	4.28359689098833e-14	1	mm10---Mpp7
mm10---Frmpd3	1.76912914759937e-18	0.160807	0.54	0.53	4.74126611556632e-14	1	mm10---Frmpd3
mm10---Crim1	1.83267921949931e-18	0.210113	0.35	0.31	4.91158030825815e-14	1	mm10---Crim1
mm10---Flot2	2.00238152873683e-18	0.112791	0.431	0.439	5.36638249701471e-14	1	mm10---Flot2
mm10---Mtch1	2.47504692654068e-18	0.131763	0.308	0.291	6.63312576312902e-14	1	mm10---Mtch1
mm10---Ift122	3.02887764194314e-18	0.132958	0.291	0.275	8.11739208040761e-14	1	mm10---Ift122
mm10---Nipsnap1	3.05363693937368e-18	0.104878	0.387	0.391	8.18374699752147e-14	1	mm10---Nipsnap1
mm10---Map2k4	3.16620950958469e-18	0.110909	0.755	0.785	8.48544148568696e-14	1	mm10---Map2k4
mm10---Frmd3	3.45306313999424e-18	0.136468	0.595	0.605	9.25420921518455e-14	1	mm10---Frmd3
mm10---D830024N08Rik	3.48774183098214e-18	0.100775	0.62	0.652	9.34714810703214e-14	1	mm10---D830024N08Rik
mm10---Gnl3l	3.53492155437201e-18	0.110221	0.442	0.446	9.47358976571697e-14	1	mm10---Gnl3l
mm10---Nipal3	3.84495343950407e-18	0.150096	0.288	0.26	1.03044752178709e-13	1	mm10---Nipal3
mm10---Phf1	3.84572426851812e-18	0.106471	0.381	0.388	1.03065410396286e-13	1	mm10---Phf1
mm10---Aacs	4.57812518425217e-18	0.156038	0.274	0.245	1.22693754937958e-13	1	mm10---Aacs
mm10---Hdac11	4.74250957357173e-18	0.137894	0.412	0.399	1.27099256571722e-13	1	mm10---Hdac11
mm10---D030068K23Rik	5.0739169264041e-18	0.203144	0.516	0.513	1.3598097362763e-13	1	mm10---D030068K23Rik
mm10---Pde4a	5.10801563437945e-18	0.131998	0.539	0.544	1.36894819001369e-13	1	mm10---Pde4a
mm10---mt-Nd4	5.18181107650622e-18	0.218742	0.26	0.267	1.38872536850367e-13	1	mm10---mt-Nd4
mm10---Gm20275	5.6964666385375e-18	0.122514	0.7	0.726	1.52665305912805e-13	1	mm10---Gm20275
mm10---Txndc15	6.36473101300629e-18	0.137261	0.403	0.395	1.70574791148569e-13	1	mm10---Txndc15
mm10---Senp8	6.72652842701898e-18	0.110312	0.38	0.391	1.80270961844109e-13	1	mm10---Senp8
mm10---Pik3r1	6.81134647291389e-18	0.103075	0.261	0.261	1.82544085474092e-13	1	mm10---Pik3r1
mm10---Atxn10	7.17292178889651e-18	0.111097	0.723	0.748	1.92234303942427e-13	1	mm10---Atxn10
mm10---Retreg1	7.82925181641756e-18	0.118216	0.454	0.458	2.09823948679991e-13	1	mm10---Retreg1
mm10---AW554918	9.30147086808712e-18	0.111073	0.569	0.585	2.49279419264735e-13	1	mm10---AW554918
mm10---Rbm4b	1.18653318240482e-17	0.103872	0.518	0.54	3.17990892884491e-13	1	mm10---Rbm4b
mm10---Banp	1.1913836642535e-17	0.122212	0.399	0.396	3.19290822019938e-13	1	mm10---Banp
mm10---Tmem50a	1.21565219946901e-17	0.182746	0.3	0.243	3.25794789457696e-13	1	mm10---Tmem50a
mm10---Scn2a	1.36065824243595e-17	0.106433	0.869	0.891	3.64656408972834e-13	1	mm10---Scn2a
mm10---Dclk1	1.3685800501586e-17	0.128472	0.905	0.923	3.66779453442506e-13	1	mm10---Dclk1
mm10---Gprasp2	1.64055739350284e-17	0.17535	0.356	0.311	4.3966938145876e-13	1	mm10---Gprasp2
mm10---Akap8l	1.6551233926507e-17	0.114944	0.862	0.883	4.43573069230389e-13	1	mm10---Akap8l
mm10---Gm2516	1.73928685581547e-17	0.205412	0.464	0.438	4.66128877358547e-13	1	mm10---Gm2516
mm10---Matk	2.77645238166631e-17	0.112296	0.685	0.703	7.44089238286571e-13	1	mm10---Matk
mm10---Rit2	2.96501469264714e-17	0.198036	0.862	0.838	7.94623937629433e-13	1	mm10---Rit2
mm10---L1cam	3.24264937235003e-17	0.134907	0.349	0.336	8.69030031789809e-13	1	mm10---L1cam
mm10---Ubap1l	3.25473195164749e-17	0.113837	0.449	0.454	8.72268163041526e-13	1	mm10---Ubap1l
mm10---Grin3a	3.25612576162717e-17	0.128055	0.674	0.709	8.72641704116082e-13	1	mm10---Grin3a
mm10---Rnpc3	3.29962233589387e-17	0.127296	0.816	0.843	8.84298786019557e-13	1	mm10---Rnpc3
mm10---Thra	3.35369384202195e-17	0.108511	0.402	0.412	8.98789949661884e-13	1	mm10---Thra
mm10---Pced1b	3.40648868666003e-17	0.117984	0.483	0.49	9.12938968024889e-13	1	mm10---Pced1b
mm10---Eef1a1	3.43990391755649e-17	0.176177	0.372	0.329	9.2189424990514e-13	1	mm10---Eef1a1
mm10---Tmem59	3.88809144758697e-17	0.128066	0.666	0.675	1.04200850795331e-12	1	mm10---Tmem59
mm10---Cmip	3.96360832414721e-17	0.15336	0.791	0.796	1.06224703087145e-12	1	mm10---Cmip
mm10---Arhgap26	3.99871581190855e-17	0.12151	0.771	0.791	1.07165583759149e-12	1	mm10---Arhgap26
mm10---Dixdc1	4.9892033789446e-17	0.114138	0.546	0.557	1.33710650555715e-12	1	mm10---Dixdc1
mm10---Stag1	5.09140976331349e-17	0.114128	0.862	0.887	1.36449781656802e-12	1	mm10---Stag1
mm10---Garnl3	5.44249469745597e-17	0.151809	0.816	0.812	1.4585885789182e-12	1	mm10---Garnl3
mm10---Scpep1os	5.71488728575067e-17	0.193453	0.289	0.232	1.53158979258118e-12	1	mm10---Scpep1os
mm10---Tcf20	6.0189946038304e-17	0.145033	0.829	0.84	1.61309055382655e-12	1	mm10---Tcf20
mm10---Plcxd3	6.35402442844742e-17	0.228808	0.584	0.551	1.70287854682391e-12	1	mm10---Plcxd3
mm10---9530077C05Rik	6.35723998628188e-17	0.103405	0.281	0.284	1.70374031632354e-12	1	mm10---9530077C05Rik
mm10---Baiap2	6.48437293319306e-17	0.194907	0.256	0.184	1.73781194609574e-12	1	mm10---Baiap2
mm10---Mapt	6.95743527056586e-17	0.14615	0.921	0.924	1.86459265251165e-12	1	mm10---Mapt
mm10---Sdk2	7.48161768853237e-17	0.172362	0.369	0.343	2.00507354052668e-12	1	mm10---Sdk2
mm10---C130073E24Rik	8.6782954310992e-17	0.245528	0.629	0.592	2.32578317553459e-12	1	mm10---C130073E24Rik
mm10---Ptprf	1.03146719373956e-16	0.132269	0.359	0.341	2.76433207922202e-12	1	mm10---Ptprf
mm10---Cbarp	1.13043297567673e-16	0.154638	0.314	0.287	3.02956037481365e-12	1	mm10---Cbarp
mm10---Arhgap24	1.19508770908062e-16	0.202588	0.411	0.397	3.20283506033606e-12	1	mm10---Arhgap24
mm10---Mrap2	1.24866737602323e-16	0.177896	0.284	0.226	3.34642856774225e-12	1	mm10---Mrap2
mm10---Zfp426	1.25604519059482e-16	0.101693	0.28	0.277	3.36620111079412e-12	1	mm10---Zfp426
mm10---Btbd9	1.81544194320632e-16	0.101431	0.795	0.824	4.86538440779295e-12	1	mm10---Btbd9
mm10---Trerf1	2.32496050721261e-16	0.115118	0.827	0.851	6.2308941593298e-12	1	mm10---Trerf1
mm10---1810034E14Rik	2.40765056703946e-16	0.108637	0.422	0.436	6.45250351966574e-12	1	mm10---1810034E14Rik
mm10---Prkcg	2.41805708945111e-16	0.174683	0.275	0.224	6.48039299972898e-12	1	mm10---Prkcg
mm10---Apoe	2.60050481606149e-16	0.145372	0.321	0.317	6.9693529070448e-12	1	mm10---Apoe
mm10---Cspg5	2.61096788955575e-16	0.114911	0.431	0.436	6.99739394400941e-12	1	mm10---Cspg5
mm10---Ttc3	2.71847522343767e-16	0.125011	0.981	0.99	7.28551359881296e-12	1	mm10---Ttc3
mm10---Lrrtm4	2.85814494656244e-16	0.108013	0.973	0.928	7.65982845678734e-12	1	mm10---Lrrtm4
mm10---Syngr3	3.13419158165567e-16	0.146891	0.416	0.397	8.3996334388372e-12	1	mm10---Syngr3
mm10---Tspyl2	3.27802088490023e-16	0.117606	0.393	0.383	8.78509597153262e-12	1	mm10---Tspyl2
mm10---Emc10	3.55028327438296e-16	0.110374	0.562	0.576	9.51475917534634e-12	1	mm10---Emc10
mm10---Hsd17b12	3.6699477047597e-16	0.111055	0.417	0.414	9.83545984875599e-12	1	mm10---Hsd17b12
mm10---Spcs2	4.01463468173164e-16	0.132081	0.373	0.355	1.07592209470408e-11	1	mm10---Spcs2
mm10---Grm8	4.01726216164437e-16	0.231182	0.684	0.62	1.07662625932069e-11	1	mm10---Grm8
mm10---Gm48678	4.08427267837132e-16	0.112774	0.562	0.584	1.09458507780352e-11	1	mm10---Gm48678
mm10---Farp1	4.38263507108301e-16	0.165755	0.6	0.57	1.17454619905025e-11	1	mm10---Farp1
mm10---Tra2a	4.44831271869104e-16	0.101127	0.839	0.868	1.1921478086092e-11	1	mm10---Tra2a
mm10---Rnf138	5.36829569500713e-16	0.114575	0.484	0.489	1.43870324626191e-11	1	mm10---Rnf138
mm10---H2-D1	6.57395846430932e-16	0.124132	0.259	0.248	1.7618208684349e-11	1	mm10---H2-D1
mm10---Gm20642	6.65288156137424e-16	0.170556	0.894	0.896	1.7829722584483e-11	1	mm10---Gm20642
mm10---Dlg1	6.94854649530396e-16	0.155685	0.597	0.573	1.86221046074146e-11	1	mm10---Dlg1
mm10---Smarca1	8.6432870665657e-16	0.147568	0.333	0.295	2.31640093383961e-11	1	mm10---Smarca1
mm10---Jazf1	9.1058757729943e-16	0.114048	0.702	0.714	2.44037470716247e-11	1	mm10---Jazf1
mm10---Luc7l3	1.01852965956852e-15	0.116763	0.791	0.807	2.72965948764365e-11	1	mm10---Luc7l3
mm10---S100pbp	1.03905527181278e-15	0.106077	0.254	0.244	2.78466812845825e-11	1	mm10---S100pbp
mm10---D3Ertd751e	1.04161032240683e-15	0.105216	0.33	0.335	2.7915156640503e-11	1	mm10---D3Ertd751e
mm10---Mttp	1.1661371859544e-15	0.101701	0.454	0.468	3.12524765835778e-11	1	mm10---Mttp
mm10---Dynlt1a	1.2211791068741e-15	0.120576	0.3	0.284	3.27276000642259e-11	1	mm10---Dynlt1a
mm10---Pde10a	1.30962115425867e-15	0.188297	0.894	0.9	3.50978469341323e-11	1	mm10---Pde10a
mm10---Pak3	1.34480912392431e-15	0.128575	0.824	0.845	3.60408845211715e-11	1	mm10---Pak3
mm10---Gm11508	1.47983512621702e-15	0.116925	0.374	0.378	3.96595813826162e-11	1	mm10---Gm11508
mm10---P2ry14	1.64109074269832e-15	0.138001	0.752	0.774	4.39812319043149e-11	1	mm10---P2ry14
mm10---Tmem196	1.68960774533835e-15	0.17429	0.362	0.316	4.52814875750679e-11	1	mm10---Tmem196
mm10---Gm16083	1.93880370905869e-15	0.168229	0.481	0.456	5.1959939402773e-11	1	mm10---Gm16083
mm10---Lyn	2.33993689487278e-15	0.119258	0.269	0.266	6.27103087825904e-11	1	mm10---Lyn
mm10---Ndfip1	2.50955221748847e-15	0.107409	0.801	0.831	6.72559994286911e-11	1	mm10---Ndfip1
mm10---Mast2	3.29313102943123e-15	0.103595	0.76	0.778	8.8255911588757e-11	1	mm10---Mast2
mm10---mt-Co1	3.3440692564872e-15	0.19338	0.387	0.41	8.96210560738569e-11	1	mm10---mt-Co1
mm10---Ergic3	3.72284442794164e-15	0.127469	0.308	0.287	9.9772230668836e-11	1	mm10---Ergic3
mm10---Btbd8	4.35852662106495e-15	0.113403	0.319	0.312	1.16808513444541e-10	1	mm10---Btbd8
mm10---Bcl9	4.78314423001892e-15	0.101393	0.402	0.41	1.28188265364507e-10	1	mm10---Bcl9
mm10---Ccdc34	4.94906680095523e-15	0.117809	0.352	0.351	1.326349902656e-10	1	mm10---Ccdc34
mm10---1700024B18Rik	4.98784401648002e-15	0.119754	0.389	0.384	1.33674219641665e-10	1	mm10---1700024B18Rik
mm10---Bach2	5.26100440602369e-15	0.104271	0.606	0.622	1.40994918081435e-10	1	mm10---Bach2
mm10---Por	5.45802487026909e-15	0.137795	0.363	0.341	1.46275066523212e-10	1	mm10---Por
mm10---Cd200	5.72569749117073e-15	0.144063	0.316	0.29	1.53448692763375e-10	1	mm10---Cd200
mm10---Mef2c	5.85992907066006e-15	0.21138	0.579	0.544	1.5704609909369e-10	1	mm10---Mef2c
mm10---Rabgap1l	6.13329528504367e-15	0.10813	0.887	0.914	1.6437231363917e-10	1	mm10---Rabgap1l
mm10---Nxph1	6.51689093067416e-15	0.164908	0.713	0.619	1.74652676942067e-10	1	mm10---Nxph1
mm10---Tmem179	7.08755939573889e-15	0.109456	0.358	0.353	1.89946591805802e-10	1	mm10---Tmem179
mm10---Nsg2	7.18675390509551e-15	0.119765	0.572	0.578	1.9260500465656e-10	1	mm10---Nsg2
mm10---Wdr78	8.03810860862874e-15	0.106165	0.287	0.276	2.1542131071125e-10	1	mm10---Wdr78
mm10---Cdkl1	8.25325835117103e-15	0.100664	0.43	0.437	2.21187323811384e-10	1	mm10---Cdkl1
mm10---Prr16	9.03911662089973e-15	0.254234	0.674	0.628	2.42248325440113e-10	1	mm10---Prr16
mm10---Kcnb1	1.27817951624539e-14	0.141581	0.358	0.335	3.42552110353765e-10	1	mm10---Kcnb1
mm10---Grik1	1.29262143707908e-14	0.281131	0.526	0.491	3.46422545137193e-10	1	mm10---Grik1
mm10---Sema5a	1.39658376220149e-14	0.238695	0.342	0.312	3.7428444827e-10	1	mm10---Sema5a
mm10---Trpc3	1.42472850062829e-14	0.168846	0.298	0.266	3.81827238168382e-10	1	mm10---Trpc3
mm10---Gprin3	1.4253764003642e-14	0.117606	0.421	0.414	3.82000875297607e-10	1	mm10---Gprin3
mm10---Vwc2l	1.52223035219007e-14	0.257009	0.357	0.293	4.07957734386938e-10	1	mm10---Vwc2l
mm10---Timp2	1.55387860918436e-14	0.165424	0.309	0.262	4.16439467261409e-10	1	mm10---Timp2
mm10---Adra1a	1.60119680763417e-14	0.191872	0.267	0.189	4.29120744445958e-10	1	mm10---Adra1a
mm10---Tspan13	1.8354358493644e-14	0.111872	0.396	0.396	4.91896807629659e-10	1	mm10---Tspan13
mm10---Cdc7	1.94028253309539e-14	0.120711	0.366	0.35	5.19995718869564e-10	1	mm10---Cdc7
mm10---Cntn3	2.27307307742977e-14	0.163133	0.6	0.614	6.09183584751179e-10	1	mm10---Cntn3
mm10---Agl	2.68291618295207e-14	0.104036	0.328	0.32	7.19021537031155e-10	1	mm10---Agl
mm10---Mpped2	2.91540280421352e-14	0.210157	0.479	0.43	7.81327951529225e-10	1	mm10---Mpped2
mm10---Sos2	4.52155091253038e-14	0.115723	0.499	0.495	1.21177564455814e-09	1	mm10---Sos2
mm10---Gabra3	4.72710941015554e-14	0.145956	0.525	0.509	1.26686532192168e-09	1	mm10---Gabra3
mm10---Gpc6	5.07209712728043e-14	0.2553	0.695	0.65	1.35932203011115e-09	1	mm10---Gpc6
mm10---Epha3	5.23394035430051e-14	0.24459	0.261	0.204	1.40269601495254e-09	1	mm10---Epha3
mm10---Sidt1	5.61656615296542e-14	0.122846	0.435	0.426	1.50523972899473e-09	1	mm10---Sidt1
mm10---Sec62	6.68935769034238e-14	0.110638	0.646	0.662	1.79274786101176e-09	1	mm10---Sec62
mm10---Ptprt	7.43602938031455e-14	0.138505	0.694	0.603	1.9928558739243e-09	1	mm10---Ptprt
mm10---Gm38134	8.85494526071603e-14	0.118081	0.467	0.469	2.3731253298719e-09	1	mm10---Gm38134
mm10---Magi3	1.04496502434357e-13	0.107983	0.593	0.605	2.80050626524078e-09	1	mm10---Magi3
mm10---Rnasek	1.09237717573033e-13	0.103741	0.418	0.427	2.92757083095729e-09	1	mm10---Rnasek
mm10---Xylt1	1.13527802909201e-13	0.117318	0.399	0.4	3.0425451179666e-09	1	mm10---Xylt1
mm10---Slc1a6	1.31121204949494e-13	0.12242	0.274	0.249	3.51404829264645e-09	1	mm10---Slc1a6
mm10---Pde1a	1.35900905550107e-13	0.324975	0.39	0.322	3.64214426874286e-09	1	mm10---Pde1a
mm10---Cep112	1.58255564582363e-13	0.186082	0.725	0.729	4.24124913080733e-09	1	mm10---Cep112
mm10---Pigt	2.30718564064329e-13	0.112705	0.292	0.279	6.18325751692403e-09	1	mm10---Pigt
mm10---Rgs20	2.32767963897136e-13	0.173448	0.319	0.283	6.23818143244324e-09	1	mm10---Rgs20
mm10---Brinp3	2.33176473592401e-13	0.20562	0.894	0.867	6.24912949227635e-09	1	mm10---Brinp3
mm10---Gm45323	2.68739478806354e-13	0.178732	0.387	0.363	7.20221803201029e-09	1	mm10---Gm45323
mm10---Scn3a	3.01659426470182e-13	0.109916	0.608	0.609	8.08447262940087e-09	1	mm10---Scn3a
mm10---Nova1	3.41578317552086e-13	0.155373	0.723	0.704	9.1542989103959e-09	1	mm10---Nova1
mm10---Plekhh2	3.7793843836377e-13	0.113424	0.286	0.282	1.0128750148149e-08	1	mm10---Plekhh2
mm10---Lamtor4	3.94134066386546e-13	0.103733	0.283	0.274	1.05627929791594e-08	1	mm10---Lamtor4
mm10---mt-Co2	4.41550434645111e-13	0.250679	0.373	0.382	1.1833551648489e-08	1	mm10---mt-Co2
mm10---Atxn7l3b	4.67821850670555e-13	0.102171	0.311	0.305	1.25376255979709e-08	1	mm10---Atxn7l3b
mm10---Gm45321	5.28371927578805e-13	0.21774	0.459	0.429	1.4160367659112e-08	1	mm10---Gm45321
mm10---Map2k1	6.71516620379349e-13	0.118663	0.365	0.347	1.79966454261666e-08	1	mm10---Map2k1
mm10---Pnmal2	7.81780113446615e-13	0.13418	0.277	0.247	2.09517070403693e-08	1	mm10---Pnmal2
mm10---Cdh20	8.97600668894483e-13	0.228804	0.319	0.293	2.40556979263722e-08	1	mm10---Cdh20
mm10---Kctd16	9.3203953538558e-13	0.153361	0.814	0.781	2.49786595483336e-08	1	mm10---Kctd16
mm10---N4bp2	9.46381887165747e-13	0.110328	0.25	0.23	2.5363034576042e-08	1	mm10---N4bp2
mm10---Spock1	1.15018580780415e-12	0.131469	0.734	0.752	3.08249796491512e-08	1	mm10---Spock1
mm10---Slc39a10	1.16530523256042e-12	0.120593	0.3	0.281	3.12301802326193e-08	1	mm10---Slc39a10
mm10---Samd12	1.86502131809295e-12	0.106723	0.92	0.936	4.99825713248911e-08	1	mm10---Samd12
mm10---Spock3	1.99837615266761e-12	0.114442	0.885	0.918	5.35564808914919e-08	1	mm10---Spock3
mm10---Adgrl3	3.14711638544717e-12	0.133374	0.982	0.99	8.4342719129984e-08	1	mm10---Adgrl3
mm10---mt-Nd1	3.35262861272539e-12	0.192902	0.271	0.278	8.98504468210404e-08	1	mm10---mt-Nd1
mm10---Ncam2	3.40733252943621e-12	0.153558	0.804	0.826	9.13165117888904e-08	1	mm10---Ncam2
mm10---2700069I18Rik	4.53463079876532e-12	0.161131	0.276	0.233	1.21528105406911e-07	1	mm10---2700069I18Rik
mm10---Hecw1	5.60438224588868e-12	0.107192	0.853	0.869	1.50197444189817e-07	1	mm10---Hecw1
mm10---mt-Cytb	7.4625650024137e-12	0.257955	0.351	0.344	1.99996742064687e-07	1	mm10---mt-Cytb
mm10---Trhde	1.86498912549161e-11	0.238757	0.32	0.286	4.9981708563175e-07	1	mm10---Trhde
mm10---C130071C03Rik	2.00665221349762e-11	0.103614	0.579	0.592	5.37782793217362e-07	1	mm10---C130071C03Rik
mm10---Ptpru	2.19638283468198e-11	0.100236	0.265	0.258	5.88630599694771e-07	1	mm10---Ptpru
mm10---Chn2	2.71849445756719e-11	0.153561	0.263	0.22	7.28556514628006e-07	1	mm10---Chn2
mm10---Snca	4.24990982454565e-11	0.1515	0.263	0.204	1.13897583297824e-06	1	mm10---Snca
mm10---mt-Co3	4.74483567157268e-11	0.245241	0.493	0.512	1.27161595998148e-06	1	mm10---mt-Co3
mm10---B230217J21Rik	4.88968383244375e-11	0.170192	0.54	0.505	1.31043526709492e-06	1	mm10---B230217J21Rik
mm10---Hs3st4	5.21795918450861e-11	0.152255	0.426	0.354	1.39841306144831e-06	1	mm10---Hs3st4
mm10---Ndn	5.46967315456689e-11	0.141289	0.273	0.237	1.46587240542393e-06	1	mm10---Ndn
mm10---Pianp	5.97549333286273e-11	0.120379	0.287	0.266	1.60143221320721e-06	1	mm10---Pianp
mm10---Gm45341	6.2813571660941e-11	0.125249	0.255	0.243	1.68340372051322e-06	1	mm10---Gm45341
mm10---Dpp10	7.64860641513942e-11	0.148876	0.903	0.89	2.04982651925736e-06	1	mm10---Dpp10
mm10---Kif26b	1.00255757832303e-10	0.10114	0.621	0.642	2.68685430990573e-06	1	mm10---Kif26b
mm10---Fam13c	1.06910840153477e-10	0.123187	0.467	0.448	2.86521051611319e-06	1	mm10---Fam13c
mm10---Fkbp2	1.93182714251073e-10	0.105161	0.331	0.323	5.17729674192877e-06	1	mm10---Fkbp2
mm10---Ccdc107	1.97012794717658e-10	0.110997	0.293	0.28	5.27994289843323e-06	1	mm10---Ccdc107
mm10---4921534H16Rik	5.612667728615e-10	0.103125	0.265	0.262	1.50419495126882e-05	1	mm10---4921534H16Rik
mm10---Neto1	6.31360417644078e-10	0.124275	0.347	0.336	1.69204591928613e-05	1	mm10---Neto1
mm10---mt-Atp6	8.45927922461416e-10	0.165724	0.35	0.365	2.2670868321966e-05	1	mm10---mt-Atp6
mm10---Mir670hg	8.94446737673671e-10	0.132177	0.357	0.381	2.39711725696544e-05	1	mm10---Mir670hg
mm10---Ptpro	1.49807614675153e-09	0.152235	0.301	0.277	4.0148440732941e-05	1	mm10---Ptpro
mm10---Cadm1	1.55424544750052e-09	0.132761	0.849	0.868	4.16537779930139e-05	1	mm10---Cadm1
mm10---Rab34	7.03266705023706e-09	0.135528	0.255	0.211	0.000188475	1	mm10---Rab34
mm10---Unc5d	8.57011579848803e-09	0.192204	0.756	0.728	0.000229679	1	mm10---Unc5d
mm10---Grik3	2.18229987522173e-08	0.162119	0.36	0.317	0.000584856	1	mm10---Grik3
mm10---Chl1	2.30658835926198e-08	0.111166	0.628	0.622	0.000618166	1	mm10---Chl1
mm10---Cacna1e	2.32682045076617e-08	0.115076	0.662	0.601	0.000623588	1	mm10---Cacna1e
mm10---Plp1	2.33027029505786e-08	0.156124	0.283	0.266	0.000624512	1	mm10---Plp1
mm10---Rims3	2.39704684505526e-08	0.102769	0.259	0.235	0.000642409	1	mm10---Rims3
mm10---Cdh10	3.58542928419357e-08	0.1191	0.753	0.761	0.000960895	1	mm10---Cdh10
mm10---Shisa6	6.62078696823465e-08	0.140162	0.372	0.342	0.00177437	1	mm10---Shisa6
mm10---Lingo2	6.99258758427045e-08	0.137496	0.982	0.983	0.00187401	1	mm10---Lingo2
mm10---Clstn2	7.52022793200115e-08	0.106991	0.634	0.652	0.00201542	1	mm10---Clstn2
mm10---Nrg3	1.90317983428088e-07	0.110558	0.998	0.997	0.00510052	1	mm10---Nrg3
mm10---Camkv	2.18638224688584e-07	0.125228	0.253	0.203	0.0058595	1	mm10---Camkv
mm10---Ctnna3	6.83097155298445e-07	0.112758	0.936	0.908	0.018307	1	mm10---Ctnna3
mm10---Kcnt2	2.42000984867748e-06	0.115477	0.47	0.453	0.0648563	1	mm10---Kcnt2
mm10---Tenm4	5.45720631533117e-06	0.120022	0.933	0.92	0.146253	1	mm10---Tenm4
mm10---Mast4	9.16646339879394e-05	0.123981	0.82	0.824	1	1	mm10---Mast4
mm10---Zfp804b	0.000155453	0.161555	0.595	0.629	1	1	mm10---Zfp804b
mm10---Cntnap5c	0.000164927	0.104322	0.39	0.374	1	1	mm10---Cntnap5c
mm10---Hs6st3	0.000211021	0.1239	0.751	0.749	1	1	mm10---Hs6st3
mm10---Galntl6	0.001024	0.173301	0.908	0.916	1	1	mm10---Galntl6
mm10---Lrp1b	0.00511985	0.146659	0.983	0.977	1	1	mm10---Lrp1b
mm10---Lsamp1	5.20163078416601e-87	0.585438	1	0.994	1.39403705015649e-82	2	mm10---Lsamp
mm10---Syt2	9.0589706021449e-87	0.779632	0.765	0.443	2.42780412137483e-82	2	mm10---Syt2
mm10---Rbms3	7.53011638447949e-85	0.805435	0.962	0.779	2.0180711910405e-80	2	mm10---Rbms3
mm10---Vwc2l1	1.09473061226243e-84	0.782503	0.646	0.28	2.9338780408633e-80	2	mm10---Vwc2l
mm10---Esrrg	2.04323039062467e-81	0.708976	0.964	0.823	5.47585744687411e-77	2	mm10---Esrrg
mm10---Ano4	8.84652824369005e-76	0.556475	0.968	0.806	2.37086956930893e-71	2	mm10---Ano4
mm10---Cacna2d3	5.42098905295679e-72	0.500921	0.868	0.545	1.45282506619242e-67	2	mm10---Cacna2d3
mm10---Gm26633	3.76167492883462e-58	0.408259	0.368	0.118	1.00812888092768e-53	2	mm10---Gm26633
mm10---Pbx3	6.95486244861861e-58	0.740549	0.775	0.493	1.86390313622979e-53	2	mm10---Pbx3
mm10---Kcna1	3.30891645281536e-57	0.576318	0.745	0.461	8.86789609354517e-53	2	mm10---Kcna1
mm10---Hs6st31	5.65021756597978e-57	0.543482	0.943	0.725	1.51425830768258e-52	2	mm10---Hs6st3
mm10---Gpc5	1.03955876922341e-52	0.876546	0.712	0.449	2.78601750151874e-48	2	mm10---Gpc5
mm10---Pex5l	4.86590960068363e-52	0.633133	0.812	0.544	1.30406377298321e-47	2	mm10---Pex5l
mm10---Gm20713	3.04692612720891e-50	0.558814	0.47	0.205	8.16576202091987e-46	2	mm10---Gm20713
mm10---Sfxn5	1.27043492811446e-49	0.492775	0.828	0.59	3.40476560734675e-45	2	mm10---Sfxn5
mm10---Ryr3	1.24378145577279e-47	0.563861	0.939	0.802	3.33333430147108e-43	2	mm10---Ryr3
mm10---9530059O14Rik	2.23937382968254e-47	0.479843	0.917	0.744	6.0015218635492e-43	2	mm10---9530059O14Rik
mm10---Nfia	5.58625027077798e-47	0.274746	0.571	0.304	1.4971150725685e-42	2	mm10---Nfia
mm10---Nxph11	3.33755287405655e-46	0.546087	0.868	0.634	8.94464170247155e-42	2	mm10---Nxph1
mm10---Man1a	1.14895449401547e-45	0.515244	0.608	0.335	3.07919804396146e-41	2	mm10---Man1a
mm10---Fras1	1.19015361704964e-45	0.375232	0.574	0.307	3.18961169369304e-41	2	mm10---Fras1
mm10---Hcn1	1.14575291552379e-44	0.373145	0.819	0.561	3.07061781360376e-40	2	mm10---Hcn1
mm10---Flt3	2.10318443549253e-44	0.382964	0.771	0.506	5.63653428711998e-40	2	mm10---Flt3
mm10---Megf11	2.33338098037892e-44	0.678612	0.397	0.167	6.2534610274155e-40	2	mm10---Megf11
mm10---March11	2.83805222769273e-43	0.474518	0.667	0.406	7.60597997021652e-39	2	mm10---March11
mm10---Gm13629	3.22298218470921e-42	0.374592	0.935	0.764	8.63759225502069e-38	2	mm10---Gm13629
mm10---Nefm	8.21554414951965e-42	0.29862	0.426	0.196	2.20176583207127e-37	2	mm10---Nefm
mm10---Sv2c	1.59863787682108e-40	0.424976	0.398	0.173	4.28434950988048e-36	2	mm10---Sv2c
mm10---Bcan	1.89053563212637e-40	0.333616	0.615	0.358	5.06663549409867e-36	2	mm10---Bcan
mm10---Lhfpl3	3.86181082073642e-40	0.527691	0.948	0.879	1.03496529995736e-35	2	mm10---Lhfpl3
mm10---B230217J21Rik1	6.41093702567555e-40	0.417474	0.745	0.491	1.71813112288105e-35	2	mm10---B230217J21Rik
mm10---Cep83	2.07398993053306e-39	0.434035	0.705	0.466	5.55829301382861e-35	2	mm10---Cep83
mm10---9530026P05Rik	6.72603832404769e-39	0.505551	0.327	0.128	1.80257827084478e-34	2	mm10---9530026P05Rik
mm10---Fam13a	1.06085524837417e-38	0.41292	0.696	0.448	2.84309206564278e-34	2	mm10---Fam13a
mm10---Tanc1	4.26433803795673e-38	0.299382	0.427	0.206	1.1428425941724e-33	2	mm10---Tanc1
mm10---Pvalb	8.23573366275151e-38	0.221476	0.287	0.112	2.20717662161741e-33	2	mm10---Pvalb
mm10---Atp8a2	2.55687993290648e-37	0.408871	0.94	0.843	6.85243822018936e-33	2	mm10---Atp8a2
mm10---C79798	4.2275493416772e-37	0.282182	0.354	0.155	1.13298322356949e-32	2	mm10---C79798
mm10---4930419G24Rik	5.822519745118e-37	0.448898	0.503	0.266	1.56043529169163e-32	2	mm10---4930419G24Rik
mm10---Gprc5b	1.03676093937955e-36	0.272245	0.451	0.23	2.77851931753721e-32	2	mm10---Gprc5b
mm10---Stac2	1.37626952724568e-36	0.229953	0.442	0.232	3.68840233301841e-32	2	mm10---Stac2
mm10---Ebf1	1.66041552209583e-36	0.854972	0.321	0.13	4.44991359921683e-32	2	mm10---Ebf1
mm10---Kcnab3	1.67446302821244e-36	0.192909	0.348	0.163	4.48756091560933e-32	2	mm10---Kcnab3
mm10---Tafa2	2.92017821523297e-36	0.676352	0.791	0.608	7.82607761682435e-32	2	mm10---Tafa2
mm10---Macrod2	6.97598655073993e-36	0.330692	0.999	0.99	1.8695643955983e-31	2	mm10---Macrod2
mm10---St3gal6	8.2335581693943e-36	0.304885	0.46	0.236	2.20659358939767e-31	2	mm10---St3gal6
mm10---Ptchd4	1.79172868369538e-35	0.12555	0.877	0.68	4.80183287230362e-31	2	mm10---Ptchd4
mm10---Adamts3	8.00794635897682e-35	0.259556	0.389	0.188	2.14612962420579e-30	2	mm10---Adamts3
mm10---Vwc2	9.03875490131954e-35	0.259186	0.565	0.343	2.42238631355364e-30	2	mm10---Vwc2
mm10---Zfp804a	9.67049962764365e-35	0.365071	0.853	0.64	2.5916939002085e-30	2	mm10---Zfp804a
mm10---Plxna4	2.26687486449567e-34	0.302935	0.947	0.79	6.0752246368484e-30	2	mm10---Plxna4
mm10---Cgnl1	3.23000673931694e-34	0.26931	0.299	0.12	8.65641806136941e-30	2	mm10---Cgnl1
mm10---Fign	3.30743211885418e-34	0.406572	0.458	0.237	8.8639180785292e-30	2	mm10---Fign
mm10---Atrnl1	3.51388144416995e-34	0.350105	0.899	0.725	9.41720227037548e-30	2	mm10---Atrnl1
mm10---Lrtm1	4.42512238566946e-34	0.232689	0.381	0.19	1.18593279935942e-29	2	mm10---Lrtm1
mm10---Efr3b	4.6959375263144e-34	0.393649	0.862	0.679	1.25851125705226e-29	2	mm10---Efr3b
mm10---Rhbdl3	5.2926276079753e-34	0.317264	0.647	0.41	1.41842419893738e-29	2	mm10---Rhbdl3
mm10---Cds1	8.70628404446247e-34	0.266875	0.513	0.291	2.33328412391594e-29	2	mm10---Cds1
mm10---Mitf	1.68131000206649e-33	0.410299	0.624	0.392	4.50591080553818e-29	2	mm10---Mitf
mm10---Stxbp6	2.33958625365659e-33	0.428938	0.623	0.388	6.27009115979967e-29	2	mm10---Stxbp6
mm10---Col16a1	2.82040982248759e-33	0.434715	0.384	0.185	7.55869832426675e-29	2	mm10---Col16a1
mm10---Lrmda	5.61803813745347e-33	0.458838	0.532	0.304	1.50563422083753e-28	2	mm10---Lrmda
mm10---Ephb1	6.3302770178875e-33	0.257947	0.876	0.675	1.69651424079385e-28	2	mm10---Ephb1
mm10---Nova11	1.05902511863473e-32	0.253562	0.886	0.69	2.83818731794107e-28	2	mm10---Nova1
mm10---Pakap	1.42772085749539e-32	0.348381	0.942	0.809	3.82629189808764e-28	2	mm10---Pakap
mm10---Dach1	1.75739457611526e-32	0.644242	0.483	0.268	4.70981746398891e-28	2	mm10---Dach1
mm10---Ldb21	2.0161770694288e-32	0.568391	0.697	0.501	5.40335454606917e-28	2	mm10---Ldb2
mm10---Epb41	2.54295014591367e-32	0.358974	0.914	0.77	6.81510639104864e-28	2	mm10---Epb41
mm10---Gm3294	3.45717188718622e-32	0.214354	0.348	0.165	9.26522065765908e-28	2	mm10---Gm3294
mm10---Col19a1	4.15191497961679e-32	0.247865	0.485	0.274	1.1127132145373e-27	2	mm10---Col19a1
mm10---P3h2	4.43046571417269e-32	0.28539	0.508	0.29	1.18736481139828e-27	2	mm10---P3h2
mm10---Mroh1	4.90186511039573e-32	0.274141	0.731	0.505	1.31369984958606e-27	2	mm10---Mroh1
mm10---Tbc1d4	5.64445149696535e-32	0.284914	0.529	0.308	1.51271300118671e-27	2	mm10---Tbc1d4
mm10---Sgcz	5.83946221744641e-32	0.45931	0.987	0.961	1.56497587427564e-27	2	mm10---Sgcz
mm10---Limk1	6.2706283666503e-32	0.308071	0.598	0.369	1.68052840226228e-27	2	mm10---Limk1
mm10---Flrt3	1.09143194697157e-31	0.2347	0.62	0.403	2.92503761788381e-27	2	mm10---Flrt3
mm10---Gm10649	1.12713397483819e-31	0.35664	0.577	0.35	3.02071905256635e-27	2	mm10---Gm10649
mm10---Slc25a13	1.68857288000948e-31	0.334093	0.528	0.305	4.5253753184254e-27	2	mm10---Slc25a13
mm10---Csmd2	2.83188304315137e-31	0.325724	0.927	0.767	7.58944655564566e-27	2	mm10---Csmd2
mm10---Stard9	4.46302015972694e-31	0.364628	0.743	0.527	1.19608940280682e-26	2	mm10---Stard9
mm10---Lrrtm41	4.84432360508792e-31	0.364823	0.995	0.942	1.29827872616356e-26	2	mm10---Lrrtm4
mm10---Cabp1	5.71233651701273e-31	0.314947	0.624	0.398	1.53090618655941e-26	2	mm10---Cabp1
mm10---Abhd3	7.91682579371012e-31	0.262256	0.439	0.235	2.12170931271431e-26	2	mm10---Abhd3
mm10---Aff1	9.85874989632586e-31	0.348894	0.298	0.125	2.64214497221533e-26	2	mm10---Aff1
mm10---C030047K22Rik	2.17250231943252e-30	0.209616	0.437	0.244	5.82230621607915e-26	2	mm10---C030047K22Rik
mm10---Tmem163	3.1293164710034e-30	0.434743	0.283	0.115	8.38656814228911e-26	2	mm10---Tmem163
mm10---Etl4	6.78617257628006e-30	0.4507	0.954	0.864	1.81869425044306e-25	2	mm10---Etl4
mm10---Pcdh10	7.62942663956265e-30	0.284581	0.644	0.424	2.04468633940279e-25	2	mm10---Pcdh10
mm10---Mapk4	8.24224439919718e-30	0.264049	0.448	0.247	2.20892149898485e-25	2	mm10---Mapk4
mm10---Dmd	8.97530974213136e-30	0.321862	0.992	0.93	2.4053830108912e-25	2	mm10---Dmd
mm10---Pde4d	1.05637350380539e-29	0.343207	0.997	0.983	2.83108099019845e-25	2	mm10---Pde4d
mm10---Col8a1	1.40379904607703e-29	0.426989	0.306	0.132	3.76218144348645e-25	2	mm10---Col8a1
mm10---Luzp1	1.98720100481854e-29	0.30077	0.894	0.725	5.32569869291369e-25	2	mm10---Luzp1
mm10---Galnt17	5.24103297306493e-29	0.193867	0.836	0.642	1.4045968367814e-24	2	mm10---Galnt17
mm10---Pfkfb3	6.30692721569208e-29	0.24531	0.357	0.175	1.69025649380548e-24	2	mm10---Pfkfb3
mm10---Adam23	8.37752156458225e-29	0.339688	0.901	0.757	2.24517577930804e-24	2	mm10---Adam23
mm10---Pls1	9.59119352653257e-29	0.273004	0.451	0.252	2.57043986511073e-24	2	mm10---Pls1
mm10---Frmd4b	1.16907315577911e-28	0.315224	0.765	0.555	3.13311605748801e-24	2	mm10---Frmd4b
mm10---Coro6	1.51766873043485e-28	0.263684	0.623	0.409	4.06735219756541e-24	2	mm10---Coro6
mm10---6330411D24Rik	1.67925147984131e-28	0.360109	0.91	0.79	4.50039396597471e-24	2	mm10---6330411D24Rik
mm10---Rph3a	1.78905468003239e-28	0.401726	0.692	0.49	4.79466654248681e-24	2	mm10---Rph3a
mm10---Asah2	2.29216048085338e-28	0.239855	0.447	0.251	6.14299008868705e-24	2	mm10---Asah2
mm10---Sept4	2.30957905941886e-28	0.213213	0.563	0.361	6.18967187924253e-24	2	mm10---Sept4
mm10---Capn2	2.40968477076997e-28	0.162792	0.558	0.367	6.45795518566351e-24	2	mm10---Capn2
mm10---Dusp15	2.56629216862844e-28	0.109118	0.407	0.251	6.87766301192422e-24	2	mm10---Dusp15
mm10---Susd4	2.69691195427357e-28	0.252047	0.86	0.672	7.22772403745317e-24	2	mm10---Susd4
mm10---A330015K06Rik	3.15594614679173e-28	0.212312	0.377	0.204	8.45793567340184e-24	2	mm10---A330015K06Rik
mm10---Caln1	4.17509095456334e-28	0.195516	0.86	0.675	1.11892437582297e-23	2	mm10---Caln1
mm10---Rap1gap	4.96843210411408e-28	0.246531	0.81	0.61	1.33153980390257e-23	2	mm10---Rap1gap
mm10---Sema6d1	7.16243087358824e-28	0.486972	0.862	0.698	1.91953147412165e-23	2	mm10---Sema6d
mm10---Lyst	8.71148528603746e-28	0.207061	0.692	0.487	2.33467805665804e-23	2	mm10---Lyst
mm10---Gm44593	1.29439284700726e-27	0.234613	0.313	0.152	3.46897282997947e-23	2	mm10---Gm44593
mm10---Pid1	1.50667661038968e-27	0.273148	0.877	0.698	4.03789331584433e-23	2	mm10---Pid1
mm10---Cmc2	2.05888866207937e-27	0.185421	0.339	0.175	5.51782161437272e-23	2	mm10---Cmc2
mm10---D430041D05Rik	2.14868254659749e-27	0.253022	0.778	0.575	5.75846922488128e-23	2	mm10---D430041D05Rik
mm10---Ankrd29	4.30161164693111e-27	0.161635	0.401	0.232	1.15283192137754e-22	2	mm10---Ankrd29
mm10---Atp6v0a2	4.35691513156199e-27	0.141619	0.462	0.289	1.16765325525861e-22	2	mm10---Atp6v0a2
mm10---Zswim6	6.93447749004377e-27	0.221636	0.7	0.497	1.85843996733173e-22	2	mm10---Zswim6
mm10---Dnah7b	8.20341726839532e-27	0.14478	0.448	0.277	2.19851582792995e-22	2	mm10---Dnah7b
mm10---Rbms1	9.60887980810241e-27	0.26964	0.706	0.501	2.57517978857145e-22	2	mm10---Rbms1
mm10---Scn1a	1.03262361244519e-26	0.281886	0.976	0.906	2.7674312813531e-22	2	mm10---Scn1a
mm10---Impa2	1.04016631887111e-26	0.171537	0.302	0.146	2.78764573457456e-22	2	mm10---Impa2
mm10---Scn1b	1.19745935274242e-26	0.100185	0.352	0.208	3.20919106534968e-22	2	mm10---Scn1b
mm10---Sgpp2	2.30798252388593e-26	0.186316	0.62	0.427	6.18539316401428e-22	2	mm10---Sgpp2
mm10---Myh14	2.83109696476146e-26	0.2333	0.36	0.185	7.58733986556071e-22	2	mm10---Myh14
mm10---Fgfr1op	3.63319108991766e-26	0.125138	0.46	0.295	9.73695212097934e-22	2	mm10---Fgfr1op
mm10---Scn8a	3.69920644535868e-26	0.301892	0.929	0.823	9.91387327356125e-22	2	mm10---Scn8a
mm10---Cit	4.04024813722541e-26	0.285795	0.963	0.897	1.08278650077641e-21	2	mm10---Cit
mm10---Pakap.1	4.33172668373986e-26	0.254421	0.807	0.615	1.16090275124228e-21	2	mm10---Pakap.1
mm10---Pla2g3	4.49144681924575e-26	0.222935	0.52	0.327	1.20370774755786e-21	2	mm10---Pla2g3
mm10---Rgl1	5.70935006798075e-26	0.146852	0.618	0.433	1.53010581821884e-21	2	mm10---Rgl1
mm10---Klhl32	5.82937848498661e-26	0.281204	0.819	0.631	1.56227343397641e-21	2	mm10---Klhl32
mm10---Camk2g	6.01451792325911e-26	0.140172	0.762	0.581	1.61189080343344e-21	2	mm10---Camk2g
mm10---Slmap	6.1317453257912e-26	0.132897	0.722	0.54	1.64330774731204e-21	2	mm10---Slmap
mm10---Abcb9	7.79488017324771e-26	0.215783	0.529	0.335	2.08902788643039e-21	2	mm10---Abcb9
mm10---St8sia1	8.86618908197312e-26	0.240441	0.725	0.524	2.3761386739688e-21	2	mm10---St8sia1
mm10---Pld5	1.18655359934112e-25	0.267442	0.745	0.545	3.1799636462342e-21	2	mm10---Pld5
mm10---Aven	1.32201126159501e-25	0.15131	0.361	0.204	3.54299018107463e-21	2	mm10---Aven
mm10---Tmeff2	1.6285835422015e-25	0.345286	0.95	0.848	4.36460389310003e-21	2	mm10---Tmeff2
mm10---Mgst3	2.04857814219232e-25	0.125717	0.335	0.19	5.4901894210754e-21	2	mm10---Mgst3
mm10---Ccdc150	2.11686182095221e-25	0.174619	0.263	0.12	5.67318968015191e-21	2	mm10---Ccdc150
mm10---C78859	2.27234468053889e-25	0.17941	0.593	0.403	6.08988374384423e-21	2	mm10---C78859
mm10---Gm28750	2.37525011764226e-25	0.16773	0.343	0.186	6.36567031528125e-21	2	mm10---Gm28750
mm10---Akain1	2.87486181092773e-25	0.24288	0.388	0.208	7.70462965328632e-21	2	mm10---Akain1
mm10---Gpatch8	2.94307626771474e-25	0.283832	0.981	0.947	7.88744439747551e-21	2	mm10---Gpatch8
mm10---Vwa5b2	3.25740010222166e-25	0.255151	0.803	0.614	8.72983227395405e-21	2	mm10---Vwa5b2
mm10---Aifm3	3.46645672735577e-25	0.253953	0.61	0.409	9.29010402931346e-21	2	mm10---Aifm3
mm10---Plekha5	5.0750539157303e-25	0.245508	0.943	0.809	1.36011444941572e-20	2	mm10---Plekha5
mm10---Adss	6.22795422603424e-25	0.14961	0.561	0.382	1.66909173257718e-20	2	mm10---Adss
mm10---Zfyve28	7.21653561505719e-25	0.283006	0.646	0.443	1.93403154483533e-20	2	mm10---Zfyve28
mm10---Thy1	9.19945367991078e-25	0.186364	0.688	0.498	2.46545358621609e-20	2	mm10---Thy1
mm10---Dtnbp1	9.4351742252919e-25	0.176924	0.522	0.339	2.52862669237823e-20	2	mm10---Dtnbp1
mm10---Sacs	1.22841642001289e-24	0.230975	0.628	0.432	3.29215600563454e-20	2	mm10---Sacs
mm10---Pip4k2a	1.40740277867444e-24	0.248528	0.525	0.33	3.7718394468475e-20	2	mm10---Pip4k2a
mm10---Cplx1	1.65270869990849e-24	0.229109	0.614	0.416	4.42925931575474e-20	2	mm10---Cplx1
mm10---Fam184b	1.77068929688002e-24	0.293782	0.439	0.252	4.74544731563846e-20	2	mm10---Fam184b
mm10---Kcnab2	1.89546467343147e-24	0.142318	0.376	0.221	5.07984532479634e-20	2	mm10---Kcnab2
mm10---Nceh1	2.01005828588197e-24	0.12897	0.759	0.583	5.38695620616369e-20	2	mm10---Nceh1
mm10---Eml2	2.10644607125536e-24	0.195062	0.751	0.564	5.64527547096437e-20	2	mm10---Eml2
mm10---2410021H03Rik	2.33486276002327e-24	0.136126	0.303	0.162	6.25743219686237e-20	2	mm10---2410021H03Rik
mm10---Etv6	2.53591690329503e-24	0.147758	0.496	0.329	6.79625730083069e-20	2	mm10---Etv6
mm10---Rnf157	2.89177808760396e-24	0.283155	0.869	0.71	7.74996527477861e-20	2	mm10---Rnf157
mm10---Lifr	3.07229808031158e-24	0.159073	0.327	0.176	8.23375885523503e-20	2	mm10---Lifr
mm10---Agbl4	3.14802071967073e-24	0.2351	1	0.978	8.43669552871757e-20	2	mm10---Agbl4
mm10---Trpc4	3.27844412374355e-24	0.308677	0.329	0.165	8.78623025163272e-20	2	mm10---Trpc4
mm10---Hspa12a	3.59015050190722e-24	0.268299	0.709	0.512	9.62160334511134e-20	2	mm10---Hspa12a
mm10---9630014M24Rik1	3.8371067847211e-24	0.160056	0.709	0.525	1.02834461830525e-19	2	mm10---9630014M24Rik
mm10---Gm5441	4.28061452688855e-24	0.117406	0.5	0.34	1.14720469320613e-19	2	mm10---Gm5441
mm10---Golim4	4.55674485453135e-24	0.157125	0.296	0.154	1.2212076210144e-19	2	mm10---Golim4
mm10---Gm1043	4.86160355709079e-24	0.147056	0.639	0.46	1.30290975330033e-19	2	mm10---Gm1043
mm10---Mcf2	5.25117474126804e-24	0.220435	0.382	0.21	1.40731483065983e-19	2	mm10---Mcf2
mm10---Car10	5.28781848357415e-24	0.200659	0.942	0.808	1.41713535359787e-19	2	mm10---Car10
mm10---Vmp1	5.84371846298585e-24	0.317806	0.88	0.745	1.56611654808021e-19	2	mm10---Vmp1
mm10---Dcc	6.68288319564389e-24	0.22339	0.972	0.869	1.79101269643256e-19	2	mm10---Dcc
mm10---Cox5a	7.20124255293478e-24	0.149053	0.581	0.406	1.92993300418652e-19	2	mm10---Cox5a
mm10---Galnt2	1.01889869075978e-23	0.138148	0.431	0.272	2.7306484912362e-19	2	mm10---Galnt2
mm10---B3galt1	1.12543380320659e-23	0.402803	0.95	0.846	3.01616259259366e-19	2	mm10---B3galt1
mm10---Apobec4	1.12996916910389e-23	0.123055	0.31	0.174	3.02831737319842e-19	2	mm10---Apobec4
mm10---Sh3gl2	1.1673582719905e-23	0.262694	0.91	0.773	3.12852016893454e-19	2	mm10---Sh3gl2
mm10---Ccdc93	1.21431352256518e-23	0.166007	0.538	0.359	3.25436024047469e-19	2	mm10---Ccdc93
mm10---Rnf152	1.24634004311205e-23	0.296608	0.827	0.649	3.3401913155403e-19	2	mm10---Rnf152
mm10---Me3	1.58503971246197e-23	0.287449	0.856	0.692	4.24790642939808e-19	2	mm10---Me3
mm10---Ckmt1	1.61101450886663e-23	0.108875	0.507	0.349	4.31751888376256e-19	2	mm10---Ckmt1
mm10---Runx2	1.64108670589907e-23	0.244431	0.519	0.329	4.39811237180952e-19	2	mm10---Runx2
mm10---Epb41l3	1.67146949313791e-23	0.269553	0.964	0.887	4.47953824160961e-19	2	mm10---Epb41l3
mm10---D630045J12Rik	1.80441839731117e-23	0.102598	0.618	0.454	4.83584130479393e-19	2	mm10---D630045J12Rik
mm10---Nxpe3	1.81083658076892e-23	0.175972	0.53	0.351	4.85304203646071e-19	2	mm10---Nxpe3
mm10---Scn9a	1.9274989055702e-23	0.296866	0.902	0.768	5.16569706692814e-19	2	mm10---Scn9a
mm10---Nfyc	2.00445913576022e-23	0.19099	0.766	0.583	5.3719504838374e-19	2	mm10---Nfyc
mm10---4933413L06Rik	2.01503997736393e-23	0.114698	0.269	0.141	5.40030713933534e-19	2	mm10---4933413L06Rik
mm10---Abca7	2.11092656871226e-23	0.16503	0.343	0.191	5.65728320414885e-19	2	mm10---Abca7
mm10---Gm13832	2.23078950806463e-23	0.258042	0.433	0.253	5.9785158816132e-19	2	mm10---Gm13832
mm10---Ppard	2.25904890843467e-23	0.152551	0.384	0.231	6.0542510746049e-19	2	mm10---Ppard
mm10---Kcna2	2.32539566133817e-23	0.20098	0.444	0.27	6.23206037238629e-19	2	mm10---Kcna2
mm10---Ksr1	3.22163414388936e-23	0.107985	0.402	0.257	8.6339795056235e-19	2	mm10---Ksr1
mm10---Chchd3	3.35601514282403e-23	0.268225	0.864	0.704	8.99412058276839e-19	2	mm10---Chchd3
mm10---Phka1	3.37711728267117e-23	0.118762	0.546	0.385	9.05067431755874e-19	2	mm10---Phka1
mm10---A930029G22Rik	3.39673547162936e-23	0.174615	0.312	0.164	9.10325106396668e-19	2	mm10---A930029G22Rik
mm10---Atp1b3	3.52091618364924e-23	0.197319	0.655	0.469	9.43605537217995e-19	2	mm10---Atp1b3
mm10---Nr6a1os	4.15193920021416e-23	0.124502	0.505	0.341	1.1127197056574e-18	2	mm10---Nr6a1os
mm10---Malat1	4.39183126722667e-23	0.235292	1	1	1.17701077961675e-18	2	mm10---Malat1
mm10---Gm326471	5.225417800422e-23	0.46721	0.705	0.516	1.4004119705131e-18	2	mm10---Gm32647
mm10---Ube4a	5.3635287740636e-23	0.115764	0.664	0.494	1.43742571144904e-18	2	mm10---Ube4a
mm10---Ttc39c	5.78094778755516e-23	0.199565	0.435	0.261	1.54929400706478e-18	2	mm10---Ttc39c
mm10---Gm48003	6.26220587131227e-23	0.186038	0.27	0.132	1.67827117351169e-18	2	mm10---Gm48003
mm10---Ctnnbl1	6.91803841458366e-23	0.121541	0.563	0.399	1.85403429510842e-18	2	mm10---Ctnnbl1
mm10---Abcc4	7.03814424689784e-23	0.132417	0.25	0.12	1.88622265816862e-18	2	mm10---Abcc4
mm10---Bckdhb	7.10265167791134e-23	0.285692	0.761	0.577	1.90351064968024e-18	2	mm10---Bckdhb
mm10---Schip1	9.39888337161393e-23	0.437154	0.794	0.625	2.51890074359253e-18	2	mm10---Schip1
mm10---Efr3a	9.47013823473109e-23	0.200942	0.657	0.47	2.53799704690793e-18	2	mm10---Efr3a
mm10---9330159M07Rik	1.13765332863988e-22	0.195867	0.46	0.286	3.04891092075488e-18	2	mm10---9330159M07Rik
mm10---Rab37	1.19227555732593e-22	0.181067	0.3	0.154	3.19529849363348e-18	2	mm10---Rab37
mm10---Crlf3	1.51273704570547e-22	0.194431	0.433	0.264	4.05413528249065e-18	2	mm10---Crlf3
mm10---Kcnip4	1.59174401925822e-22	0.4774	0.975	0.957	4.26587397161204e-18	2	mm10---Kcnip4
mm10---Pcx	1.69207868448974e-22	0.13339	0.426	0.271	4.5347708744325e-18	2	mm10---Pcx
mm10---Gm26673	2.14607790045147e-22	0.183455	0.299	0.152	5.75148877320994e-18	2	mm10---Gm26673
mm10---Herc3	2.16073733720966e-22	0.174866	0.615	0.435	5.79077606372189e-18	2	mm10---Herc3
mm10---Atg3	2.30228334701165e-22	0.104352	0.53	0.374	6.17011936999123e-18	2	mm10---Atg3
mm10---Dexi	3.13576540363153e-22	0.129489	0.431	0.278	8.40385128173249e-18	2	mm10---Dexi
mm10---Kazn	3.18472592575538e-22	0.10411	0.467	0.316	8.53506548102443e-18	2	mm10---Kazn
mm10---Ank2	3.97868179251933e-22	0.186115	1	0.994	1.06628672039518e-17	2	mm10---Ank2
mm10---Nell2	4.46902938405567e-22	0.524817	0.511	0.377	1.19769987492692e-17	2	mm10---Nell2
mm10---Kcnc1	5.69448427406227e-22	0.151353	0.827	0.663	1.52612178544869e-17	2	mm10---Kcnc1
mm10---Wdr70	5.93300518077641e-22	0.120815	0.634	0.469	1.59004538844808e-17	2	mm10---Wdr70
mm10---Csgalnact1	7.20348054660562e-22	0.222578	0.321	0.17	1.93053278649031e-17	2	mm10---Csgalnact1
mm10---Miga2	7.24291365760161e-22	0.16595	0.709	0.532	1.94110086023723e-17	2	mm10---Miga2
mm10---Sgms1	9.52900304463557e-22	0.108085	0.794	0.634	2.55377281596233e-17	2	mm10---Sgms1
mm10---Tshz2	1.04638575202549e-21	0.328688	0.784	0.608	2.80431381542831e-17	2	mm10---Tshz2
mm10---Gm43507	1.32199755892542e-21	0.242956	0.351	0.19	3.54295345792012e-17	2	mm10---Gm43507
mm10---Stk39	1.45659989272047e-21	0.257634	0.8	0.63	3.90368771249086e-17	2	mm10---Stk39
mm10---Pnkd	1.60623721185579e-21	0.202835	0.721	0.538	4.30471572777351e-17	2	mm10---Pnkd
mm10---Gas6	1.64368031527453e-21	0.149927	0.593	0.421	4.40506324493575e-17	2	mm10---Gas6
mm10---Frmpd1	1.83506137780072e-21	0.120508	0.362	0.221	4.91796449250592e-17	2	mm10---Frmpd1
mm10---Sycp2	1.97129577130836e-21	0.161649	0.63	0.454	5.28307266710642e-17	2	mm10---Sycp2
mm10---Cacng7	2.00941844276409e-21	0.10777	0.598	0.443	5.38524142660775e-17	2	mm10---Cacng7
mm10---Arhgap241	2.03520800041096e-21	0.108074	0.546	0.385	5.45435744110136e-17	2	mm10---Arhgap24
mm10---Gm16189	2.15058717601917e-21	0.110536	0.398	0.257	5.76357363173137e-17	2	mm10---Gm16189
mm10---Gm31763	2.37740454393973e-21	0.161797	0.361	0.213	6.37144417775848e-17	2	mm10---Gm31763
mm10---Adamts17	3.2308383048385e-21	0.175773	0.556	0.382	8.65864665696717e-17	2	mm10---Adamts17
mm10---Lekr1	3.73042459790124e-21	0.201157	0.733	0.554	9.99753792237532e-17	2	mm10---Lekr1
mm10---Ndufa10	3.74929700822797e-21	0.190236	0.706	0.53	1.0048115982051e-16	2	mm10---Ndufa10
mm10---Lrpprc	3.81959520833691e-21	0.189523	0.704	0.526	1.02365151583429e-16	2	mm10---Lrpprc
mm10---Shisa61	3.9553111538083e-21	0.274892	0.516	0.335	1.06002338922062e-16	2	mm10---Shisa6
mm10---Arhgap22	3.96380357147693e-21	0.205192	0.44	0.272	1.06229935715582e-16	2	mm10---Arhgap22
mm10---Mbnl2	4.13406007323039e-21	0.232574	0.905	0.77	1.10792809962574e-16	2	mm10---Mbnl2
mm10---Camk4	4.13903468608856e-21	0.129093	0.649	0.482	1.10926129587173e-16	2	mm10---Camk4
mm10---Macrod2os1	4.51351600611302e-21	0.177119	0.495	0.327	1.20962228963829e-16	2	mm10---Macrod2os1
mm10---Gm13883	4.55323952471606e-21	0.112718	0.279	0.155	1.2202681926239e-16	2	mm10---Gm13883
mm10---Nars	4.71485624983706e-21	0.10441	0.577	0.418	1.26358147495633e-16	2	mm10---Nars
mm10---Lrrc20	5.47014924824193e-21	0.172478	0.339	0.189	1.46599999852884e-16	2	mm10---Lrrc20
mm10---Tbc1d30	5.54976885448592e-21	0.118864	0.458	0.307	1.48733805300223e-16	2	mm10---Tbc1d30
mm10---Kcnc3	6.09475241712922e-21	0.240663	0.524	0.343	1.63339364779063e-16	2	mm10---Kcnc3
mm10---Pcnx2	6.96897515459888e-21	0.155861	0.813	0.65	1.8676853414325e-16	2	mm10---Pcnx2
mm10---Asap1	7.0182968131989e-21	0.272332	0.911	0.8	1.88090354593731e-16	2	mm10---Asap1
mm10---Abcc8	7.27862701614143e-21	0.12793	0.382	0.238	1.9506720403259e-16	2	mm10---Abcc8
mm10---Tubb3	7.50454752626025e-21	0.131724	0.729	0.563	2.01121873703775e-16	2	mm10---Tubb3
mm10---Nacc2	7.665552002778e-21	0.125676	0.325	0.189	2.0543679367445e-16	2	mm10---Nacc2
mm10---Patj	7.87744707575081e-21	0.167359	0.742	0.569	2.11115581630122e-16	2	mm10---Patj
mm10---Pparg	9.24036233059113e-21	0.181634	0.261	0.127	2.47641710459842e-16	2	mm10---Pparg
mm10---Myo16	9.65417791993716e-21	0.288758	0.776	0.606	2.58731968254316e-16	2	mm10---Myo16
mm10---Nup93	9.79996317025716e-21	0.180435	0.712	0.535	2.62639012962892e-16	2	mm10---Nup93
mm10---Map1a	9.90339276466362e-21	0.102958	0.525	0.375	2.65410926092985e-16	2	mm10---Map1a
mm10---Ttc39b	9.97533507969976e-21	0.200985	0.546	0.368	2.67338980135953e-16	2	mm10---Ttc39b
mm10---Gm12239	1.02775499758184e-20	0.260794	0.396	0.233	2.75438339351934e-16	2	mm10---Gm12239
mm10---Stambpl1	1.12615234744302e-20	0.10824	0.557	0.4	3.01808829114729e-16	2	mm10---Stambpl1
mm10---Mgat5	1.14952463129987e-20	0.271617	0.819	0.657	3.08072601188365e-16	2	mm10---Mgat5
mm10---Eps15l1	1.16502903443501e-20	0.153304	0.827	0.668	3.12227781228584e-16	2	mm10---Eps15l1
mm10---4930595D18Rik	1.16937074871492e-20	0.139248	0.303	0.169	3.13391360655597e-16	2	mm10---4930595D18Rik
mm10---Lrrfip2	1.18381814945132e-20	0.132933	0.652	0.487	3.17263264052954e-16	2	mm10---Lrrfip2
mm10---Habp4	1.19404371561936e-20	0.121065	0.444	0.294	3.20003715785988e-16	2	mm10---Habp4
mm10---Nefl	1.23891088072203e-20	0.156157	0.34	0.196	3.32028116033504e-16	2	mm10---Nefl
mm10---Glra1	1.28812396347541e-20	0.262899	0.476	0.3	3.4521722221141e-16	2	mm10---Glra1
mm10---Camk1d	1.43491890451718e-20	0.116804	0.742	0.581	3.84558266410604e-16	2	mm10---Camk1d
mm10---Msrb3	1.51497336175281e-20	0.169769	0.386	0.233	4.06012860949752e-16	2	mm10---Msrb3
mm10---Dlat	1.59492851291547e-20	0.182298	0.69	0.516	4.27440841461347e-16	2	mm10---Dlat
mm10---Mpp71	1.59644497236247e-20	0.108006	0.673	0.511	4.27847252593141e-16	2	mm10---Mpp7
mm10---Lgi3	1.82716568880456e-20	0.127199	0.458	0.305	4.89680404599623e-16	2	mm10---Lgi3
mm10---Sh3pxd2a	1.86307029610193e-20	0.166599	0.513	0.347	4.99302839355316e-16	2	mm10---Sh3pxd2a
mm10---Kcnab1	2.01092614489585e-20	0.122146	0.563	0.399	5.38928206832088e-16	2	mm10---Kcnab1
mm10---Asb13	2.0513341282436e-20	0.167917	0.492	0.329	5.49757546369286e-16	2	mm10---Asb13
mm10---Mthfsd	2.20519919028564e-20	0.100833	0.38	0.247	5.9099338299655e-16	2	mm10---Mthfsd
mm10---Rhobtb2	2.43385966461853e-20	0.136041	0.401	0.257	6.52274390117765e-16	2	mm10---Rhobtb2
mm10---Laptm4b	2.52406429389121e-20	0.118186	0.427	0.282	6.76449230762844e-16	2	mm10---Laptm4b
mm10---Nr6a1	2.58209328787939e-20	0.241306	0.915	0.793	6.92001001151677e-16	2	mm10---Nr6a1
mm10---Ppm1l	2.74678079522635e-20	0.227355	0.812	0.647	7.36137253120661e-16	2	mm10---Ppm1l
mm10---Osbpl1a	3.11988484073397e-20	0.222699	0.661	0.482	8.36129137316703e-16	2	mm10---Osbpl1a
mm10---Gm15738	3.42975390681716e-20	0.111308	0.673	0.514	9.19174047026999e-16	2	mm10---Gm15738
mm10---Etfa	3.45901680565655e-20	0.141647	0.604	0.439	9.27016503915955e-16	2	mm10---Etfa
mm10---Slc4a8	4.67910528633237e-20	0.162165	0.64	0.47	1.25400021673707e-15	2	mm10---Slc4a8
mm10---Tnks	4.88373611494423e-20	0.214847	0.757	0.584	1.30884127880505e-15	2	mm10---Tnks
mm10---Grm1	5.0151348409221e-20	0.259206	0.803	0.637	1.34405613736712e-15	2	mm10---Grm1
mm10---Uhrf1bp1l	5.23709192734356e-20	0.132865	0.644	0.481	1.40354063652807e-15	2	mm10---Uhrf1bp1l
mm10---Idh3b	5.24534522249205e-20	0.119108	0.524	0.371	1.40575251962787e-15	2	mm10---Idh3b
mm10---Gm12296	5.39286733864584e-20	0.124825	0.361	0.226	1.44528844675709e-15	2	mm10---Gm12296
mm10---Gm37459	5.90542469956314e-20	0.245131	0.296	0.151	1.58265381948292e-15	2	mm10---Gm37459
mm10---Trpm2	6.34577475697492e-20	0.190431	0.485	0.32	1.70066763486928e-15	2	mm10---Trpm2
mm10---Abhd6	7.08417536080057e-20	0.148069	0.545	0.384	1.89855899669455e-15	2	mm10---Abhd6
mm10---Wdr60	7.30150399063918e-20	0.190866	0.653	0.48	1.9568030694913e-15	2	mm10---Wdr60
mm10---Zfp827	7.31001538474684e-20	0.140763	0.558	0.396	1.95908412311215e-15	2	mm10---Zfp827
mm10---Tshz3	7.39230518091948e-20	0.10407	0.311	0.185	1.98113778848642e-15	2	mm10---Tshz3
mm10---Taok3	7.84523054258227e-20	0.127551	0.701	0.54	2.10252178541205e-15	2	mm10---Taok3
mm10---Pde7b	8.12627445301602e-20	0.134641	0.591	0.429	2.17784155340829e-15	2	mm10---Pde7b
mm10---Igsf9b	8.29309455850926e-20	0.156842	0.697	0.53	2.22254934168048e-15	2	mm10---Igsf9b
mm10---Nrg4	8.61506862865332e-20	0.167114	0.295	0.16	2.30883839247909e-15	2	mm10---Nrg4
mm10---Bicc1	8.83590291321803e-20	0.152632	0.48	0.324	2.36802198074243e-15	2	mm10---Bicc1
mm10---Ncs1	8.85042438548887e-20	0.11982	0.485	0.337	2.37191373531102e-15	2	mm10---Ncs1
mm10---Dnm2	8.89018680258986e-20	0.172922	0.73	0.56	2.38257006309408e-15	2	mm10---Dnm2
mm10---Cerk	9.87929540568629e-20	0.135836	0.501	0.35	2.64765116872393e-15	2	mm10---Cerk
mm10---Rapgef4os1	1.00624980667926e-19	0.106968	0.407	0.272	2.69674948190041e-15	2	mm10---Rapgef4os1
mm10---Mindy3	1.05577854667563e-19	0.124065	0.415	0.272	2.82948650509068e-15	2	mm10---Mindy3
mm10---Sirt3	1.30063476486633e-19	0.124083	0.488	0.339	3.48570116984176e-15	2	mm10---Sirt3
mm10---Dnajc15	1.45033631606898e-19	0.16096	0.533	0.372	3.88690132706486e-15	2	mm10---Dnajc15
mm10---St3gal3	1.52042772426291e-19	0.205171	0.758	0.588	4.0747463010246e-15	2	mm10---St3gal3
mm10---Gm28756	1.79231261668986e-19	0.17643	0.337	0.192	4.80339781272883e-15	2	mm10---Gm28756
mm10---Mrps9	1.83704740561785e-19	0.114135	0.421	0.281	4.92328704705583e-15	2	mm10---Mrps9
mm10---Map4k2	1.89326900399937e-19	0.203008	0.63	0.456	5.07396093071832e-15	2	mm10---Map4k2
mm10---Slc25a3	1.99724434871272e-19	0.121138	0.709	0.551	5.3526148545501e-15	2	mm10---Slc25a3
mm10---Iqsec3	2.06584797859108e-19	0.153616	0.725	0.56	5.5364725826241e-15	2	mm10---Iqsec3
mm10---Glud1	2.11300876670817e-19	0.120306	0.556	0.403	5.6628634947779e-15	2	mm10---Glud1
mm10---Foxp1	2.36185438961975e-19	0.341596	0.848	0.705	6.32976976418092e-15	2	mm10---Foxp1
mm10---Gpcpd1	2.37360599452547e-19	0.110491	0.619	0.467	6.36126406532827e-15	2	mm10---Gpcpd1
mm10---Anxa6	2.55366629280023e-19	0.147075	0.373	0.228	6.84382566470462e-15	2	mm10---Anxa6
mm10---Snph	2.70361967473707e-19	0.266162	0.84	0.697	7.24570072829534e-15	2	mm10---Snph
mm10---Stk10	2.7474885797092e-19	0.15922	0.37	0.226	7.36326939362065e-15	2	mm10---Stk10
mm10---Tango2	2.93729528116284e-19	0.214421	0.862	0.717	7.87195135351641e-15	2	mm10---Tango2
mm10---Mast41	2.98568099064995e-19	0.381533	0.907	0.811	8.00162505494187e-15	2	mm10---Mast4
mm10---Rasgrf2	3.53919598762114e-19	0.153568	0.589	0.43	9.48504524682466e-15	2	mm10---Rasgrf2
mm10---Hipk2	3.80027579968202e-19	0.126668	0.71	0.552	1.01847391431478e-14	2	mm10---Hipk2
mm10---Hspa4l	4.09604132016358e-19	0.209041	0.742	0.572	1.09773907380384e-14	2	mm10---Hspa4l
mm10---Setx	4.50135995564244e-19	0.128732	0.808	0.655	1.20636446811217e-14	2	mm10---Setx
mm10---Lgi2	4.73155064000873e-19	0.135655	0.345	0.21	1.26805557152234e-14	2	mm10---Lgi2
mm10---Adarb2	4.79704702033522e-19	0.45528	0.77	0.628	1.28560860144984e-14	2	mm10---Adarb2
mm10---2210408F21Rik	5.33255057267198e-19	0.176573	0.828	0.674	1.42912355347609e-14	2	mm10---2210408F21Rik
mm10---Reep3	5.64933263781686e-19	0.235328	0.526	0.353	1.51402114693492e-14	2	mm10---Reep3
mm10---Rerg	5.74255989335911e-19	0.102022	0.435	0.302	1.53900605142024e-14	2	mm10---Rerg
mm10---Med15	6.05374369553418e-19	0.105089	0.608	0.458	1.62240331040316e-14	2	mm10---Med15
mm10---Ccdc88c	6.07786787129976e-19	0.111891	0.255	0.141	1.62886858950834e-14	2	mm10---Ccdc88c
mm10---Desi1	6.23527952681262e-19	0.108582	0.64	0.487	1.67105491318578e-14	2	mm10---Desi1
mm10---Dym	6.28906991836725e-19	0.170035	0.724	0.559	1.68547073812242e-14	2	mm10---Dym
mm10---St8sia5	6.5544513139782e-19	0.169281	0.46	0.301	1.75659295214616e-14	2	mm10---St8sia5
mm10---Rnf207	7.75054311905271e-19	0.13819	0.483	0.331	2.07714555590613e-14	2	mm10---Rnf207
mm10---Ggact	7.81747849508605e-19	0.132616	0.687	0.526	2.09508423668306e-14	2	mm10---Ggact
mm10---Phf24	7.89518419469069e-19	0.159001	0.679	0.514	2.1159093641771e-14	2	mm10---Phf24
mm10---Vti1a	7.93574249981526e-19	0.221289	0.909	0.78	2.12677898995049e-14	2	mm10---Vti1a
mm10---Myrip	8.48882257250417e-19	0.156116	0.565	0.402	2.27500444943112e-14	2	mm10---Myrip
mm10---Slc4a3	8.73979816194451e-19	0.131094	0.853	0.707	2.34226590740113e-14	2	mm10---Slc4a3
mm10---Manba	9.06513042073062e-19	0.200474	0.569	0.399	2.42945495275581e-14	2	mm10---Manba
mm10---Entpd3	9.57250673346555e-19	0.143794	0.353	0.214	2.56543180456877e-14	2	mm10---Entpd3
mm10---Dync1i1	9.7347660726784e-19	0.220263	0.971	0.903	2.60891730747781e-14	2	mm10---Dync1i1
mm10---Klc2	1.1125381473807e-18	0.109306	0.554	0.406	2.98160223498029e-14	2	mm10---Klc2
mm10---Slc35f31	1.16902653340451e-18	0.334278	0.671	0.499	3.13299110952408e-14	2	mm10---Slc35f3
mm10---Tiam1	1.25552462437459e-18	0.198267	0.7	0.53	3.36480599332391e-14	2	mm10---Tiam1
mm10---Npas3	1.278453442184e-18	0.31385	0.902	0.773	3.42625522505311e-14	2	mm10---Npas3
[truncated: 5,972 more rows]

## Sheet: TH IN DEGs WT v KO
	p_val	avg_log2FC	pct.1	pct.2	p_val_adj
[truncated: 524 more rows]
