# Supplementary material for: Transplantation of Human IPSC-derived Microglia Ameliorates Neuropathology and Circuit Dysfunction in Progranulin-Deficient Mice
Source: bioRxiv preprint, doi:10.64898/2026.01.13.699312, version 1 (2026-01-13)
Supplement: Supplementary Table S5 [file 699312_file06.xlsx]

## Sheet: Human FTD patient information
Table of characteristics pertaining to the 24 donors whose brain tissues were used in this manuscirpt. Samples used for single nuclei RNAseq and western blot indiciated.
Clinical diagnosis: non-fluent variant primary progressive aphasia (nfv-PPA), cortical basal syndrome (CBS), behavioral variant frontotemporal dementia (bv-FTD), primary progressive aphasia (PPA).
Neuropathological diagnosis: frontotemporal lobar degeneration (FTLD), Alzheimer’s disease neuropathological change (ADNC), Consortium to Establish a Registry for Alzheimer’s Disease neuritic plaque (CERAD NP).
Sex	Age at death	Clinical Diagnosis	Primary Neuropath Diagnosis	Comorbid Neuropath Diagnosis	Post-mortem interval (hrs)	ADThal Phase	AD Braak Stage	AD CERAD NP Score	ADNC Level	LBD Stage	Region used in study
M	74	nfvPPA, CBS	FTLD-TDP-A		30.9	4	5	2	3	0	superior frontal gyrus
F	73	nfvPPA, CBS	FTLD-TDP-A		20.7	0	2	0	0	0	superior frontal gyrus
F	66	bvFTD	FTLD-TDP-A		7.4	1	0	1	1	0	superior frontal gyrus
M	68	bvFTD	FTLD-TDP-A		13.5	0	0	0	0	1	superior frontal gyrus
M	64	bvFTD	FTLD-TDP-A		7.2	0	2	0	0	0	superior frontal gyrus
F	70	PPA, unspecified	FTLD-TDP-A		9.1	1	1	0	1	0	superior frontal gyrus
F	56	bvFTD	FTLD-TDP-A		7.6	2	1	0	1	0	superior frontal gyrus
F	78	FTD, mixed	FTLD-TDP-A		19	2	0	2	1	0	superior frontal gyrus
F	66	bvFTD	FTLD-TDP-A		17.1	0	0	0	0	0	superior frontal gyrus
F	64	CBS	FTLD-TDP-A		10.5	2	1	0	1	0	superior frontal gyrus
F	63	bvFTD	FTLD-TDP-A		10.4	4	1	2	1	0	superior frontal gyrus
F	84	bvFTD	FTLD-TDP-A		10.7	2	3	1	1	0	superior frontal gyrus
M	76	Control	None	ADNC, low; AGD	8.2	1	2	1	1	0	superior frontal gyrus
F	98	Control	None	LBD, transitional limbic; ADNC low	17	2	4	1	1	2	superior frontal gyrus
F	86	Control	iLBD, brainstem predominant		6.4	2	0	0	1	4	superior frontal gyrus
F	92	Control	None		8	0	2	0	0	0	superior frontal gyrus
F	82	Control	None		9.6	2	1	0	1	0	superior frontal gyrus
F	60	Control	None		20.5	3	0	0	1	0	superior frontal gyrus
F	67	Control	None		19.4	0	0	0	0	0	superior frontal gyrus
M	95	Control	None		9.6	3	4	3	2	0	superior frontal gyrus
F	92	Control	None		13	2	4	2	2	0	superior frontal gyrus
M	91	Control	None		5.6	2	4	1	1	0	superior frontal gyrus
F	78	Control	None		11.6	1	4	0	1	0	superior frontal gyrus
F	84	Control	None		7.7	2	2	1	1	0	superior frontal gyrus

## Sheet: Human EN marker
	p_val	avg_log2FC	pct.1	pct.2	p_val_adj	cluster	gene
GNAL	0	2.80451	0.934	0.296	0	0	GNAL
STXBP6	0	2.37757	0.886	0.272	0	0	STXBP6
SEMA3C	0	2.47529	0.768	0.192	0	0	SEMA3C
MOXD1	0	2.53241	0.808	0.234	0	0	MOXD1
SERPINE2	0	2.24599	0.823	0.257	0	0	SERPINE2
ACVR1C	0	3.31709	0.687	0.124	0	0	ACVR1C
CUX2	0	0.925068	0.96	0.402	0	0	CUX2
MEIS2	0	1.64671	0.954	0.414	0	0	MEIS2
AC008574.1	0	1.78736	0.861	0.342	0	0	AC008574.1
SLC24A4	0	2.02622	0.786	0.28	0	0	SLC24A4
TRPC6	0	2.05086	0.735	0.256	0	0	TRPC6
LINC00507	0	2.17682	0.689	0.218	0	0	LINC00507
THSD7A	0	1.96096	0.747	0.282	0	0	THSD7A
GLP2R	0	3.45444	0.523	0.071	0	0	GLP2R
BMPR1B	0	2.76034	0.563	0.117	0	0	BMPR1B
LAMP5	0	3.37158	0.502	0.058	0	0	LAMP5
EPHA6	0	1.61441	0.997	0.563	0	0	EPHA6
LINC02306	0	2.42834	0.717	0.284	0	0	LINC02306
KCNIP2	0	1.93344	0.678	0.262	0	0	KCNIP2
NHSL2	0	2.03144	0.672	0.269	0	0	NHSL2
HPCAL1	0	1.46843	0.672	0.272	0	0	HPCAL1
ANKRD62	0	2.41616	0.543	0.151	0	0	ANKRD62
AC005162.3	0	1.6185	0.666	0.287	0	0	AC005162.3
ART3	0	1.59963	0.659	0.294	0	0	ART3
TESPA1	0	1.29299	0.923	0.558	0	0	TESPA1
TTC6	0	1.95688	0.585	0.225	0	0	TTC6
AC093607.1	0	2.23247	0.554	0.197	0	0	AC093607.1
GSG1L	0	1.44159	0.668	0.311	0	0	GSG1L
COL27A1	0	2.44001	0.476	0.12	0	0	COL27A1
FAM84A	0	1.658	0.681	0.327	0	0	FAM84A
INHBA-AS1	0	2.6792	0.442	0.088	0	0	INHBA-AS1
CDH9	0	1.87069	0.993	0.64	0	0	CDH9
LAMB1	0	1.43835	0.817	0.467	0	0	LAMB1
PCDH8	0	2.09983	0.456	0.11	0	0	PCDH8
ZNF804A	0	1.13513	0.899	0.557	0	0	ZNF804A
HOPX	0	1.4293	0.749	0.408	0	0	HOPX
GNG2	0	1.23681	0.861	0.521	0	0	GNG2
FAM196B	0	1.58037	0.583	0.244	0	0	FAM196B
ARL4A	0	1.78968	0.581	0.245	0	0	ARL4A
PTH2R	0	1.47489	0.697	0.361	0	0	PTH2R
AC022414.1	0	2.25614	0.472	0.139	0	0	AC022414.1
LINC01378	0	1.242	0.881	0.552	0	0	LINC01378
ZNF608	0	1.28619	0.581	0.252	0	0	ZNF608
MAML2	0	1.78295	0.635	0.308	0	0	MAML2
COL24A1	0	1.09182	0.769	0.443	0	0	COL24A1
TPD52L1	0	1.50779	0.479	0.153	0	0	TPD52L1
JAG1	0	2.76278	0.408	0.086	0	0	JAG1
PPP4R4	0	0.995325	0.841	0.524	0	0	PPP4R4
PDE8B	0	1.73714	0.537	0.222	0	0	PDE8B
ITGA9	0	1.14514	0.869	0.56	0	0	ITGA9
PDGFD	0	3.40102	0.375	0.07	0	0	PDGFD
ROBO1	0	0.73366	0.937	0.633	0	0	ROBO1
PRELID2	0	1.00877	0.748	0.444	0	0	PRELID2
SYNJ2	0	1.10043	0.866	0.563	0	0	SYNJ2
GREB1L	0	2.22241	0.544	0.243	0	0	GREB1L
CCDC88C	0	2.06623	0.434	0.133	0	0	CCDC88C
PVT1	0	1.14293	0.847	0.548	0	0	PVT1
HHAT	0	2.09277	0.748	0.45	0	0	HHAT
GALNT13	0	1.23141	0.949	0.656	0	0	GALNT13
AC025887.2	0	1.63406	0.55	0.259	0	0	AC025887.2
LINC00276	0	2.05445	0.601	0.311	0	0	LINC00276
SEMA5B	0	1.03639	0.592	0.302	0	0	SEMA5B
GULP1	0	0.453604	0.775	0.486	0	0	GULP1
ZNF516	0	1.12388	0.642	0.353	0	0	ZNF516
AC004158.1	0	1.38725	0.541	0.253	0	0	AC004158.1
CYP1B1-AS1	0	1.19141	0.643	0.356	0	0	CYP1B1-AS1
SMAD3	0	1.15903	0.861	0.574	0	0	SMAD3
KCNG3	0	1.5898	0.529	0.243	0	0	KCNG3
CEMIP2	0	1.0793	0.859	0.576	0	0	CEMIP2
VSTM2A	0	0.667411	0.775	0.492	0	0	VSTM2A
LIPC	0	3.91865	0.319	0.037	0	0	LIPC
RASGRF2	0	1.19078	0.972	0.692	0	0	RASGRF2
SLIT3	0	0.731873	0.971	0.693	0	0	SLIT3
LINC02552	0	1.70021	0.47	0.192	0	0	LINC02552
ITPKA	0	1.31962	0.557	0.282	0	0	ITPKA
AC069133.1	0	1.59341	0.544	0.269	0	0	AC069133.1
CDH13	0	0.876198	0.957	0.682	0	0	CDH13
PLEKHA2	0	1.26565	0.675	0.402	0	0	PLEKHA2
SLCO2A1	0	2.23506	0.365	0.092	0	0	SLCO2A1
CBLN4	0	1.63104	0.428	0.158	0	0	CBLN4
CA10	0	0.558046	0.96	0.691	0	0	CA10
MYOM2	0	1.19722	0.615	0.346	0	0	MYOM2
KIAA1217	0	0.115138	0.878	0.61	0	0	KIAA1217
ITGA4	0	2.72763	0.336	0.069	0	0	ITGA4
CBLN2	0	1.88696	0.994	0.728	0	0	CBLN2
CALN1	0	1.08088	0.971	0.706	0	0	CALN1
LZTS1	0	1.11169	0.635	0.37	0	0	LZTS1
SH3RF2	0	1.74593	0.439	0.174	0	0	SH3RF2
AKAP5	0	1.50902	0.52	0.256	0	0	AKAP5
SLC12A8	0	1.25206	0.699	0.435	0	0	SLC12A8
KCNMB2-AS1	0	1.04098	0.629	0.368	0	0	KCNMB2-AS1
GRM1	0	1.23453	0.986	0.726	0	0	GRM1
PTPRO	0	1.46027	0.978	0.718	0	0	PTPRO
KCNN3	0	1.2049	0.652	0.393	0	0	KCNN3
TMOD1	0	1.1381	0.842	0.584	0	0	TMOD1
LINC01484	0	3.30996	0.3	0.046	0	0	LINC01484
MAN1A1	0	1.35227	0.945	0.694	0	0	MAN1A1
PAMR1	0	1.61585	0.397	0.146	0	0	PAMR1
KCNN2	0	1.29537	0.892	0.645	0	0	KCNN2
KITLG	0	1.06538	0.712	0.466	0	0	KITLG
KLHL4	0	1.07242	0.738	0.495	0	0	KLHL4
TEK	0	1.63722	0.381	0.138	0	0	TEK
CDH22	0	0.979154	0.841	0.6	0	0	CDH22
DGKG	0	0.498933	0.944	0.704	0	0	DGKG
ATP8B4	0	1.1206	0.65	0.412	0	0	ATP8B4
AC106795.3	0	1.74573	0.478	0.241	0	0	AC106795.3
FAM163A	0	1.78082	0.371	0.134	0	0	FAM163A
ZFHX4	0	1.57874	0.329	0.093	0	0	ZFHX4
WNT3	0	1.57034	0.439	0.203	0	0	WNT3
COX7A2L	0	1.14622	0.823	0.589	0	0	COX7A2L
PDZD2	0	1.72821	0.99	0.757	0	0	PDZD2
TANC1	0	2.21852	0.312	0.079	0	0	TANC1
PRKG1	0	0.201157	0.954	0.727	0	0	PRKG1
GALNTL6	0	1.11145	0.952	0.726	0	0	GALNTL6
ACVR1	0	1.18795	0.591	0.366	0	0	ACVR1
AC011287.1	0	1.40484	0.94	0.717	0	0	AC011287.1
NDST3	0	1.40567	0.988	0.767	0	0	NDST3
CSGALNACT1	0	0.590947	0.936	0.721	0	0	CSGALNACT1
NECTIN3	0	1.32644	0.944	0.73	0	0	NECTIN3
TMTC1	0	0.717075	0.912	0.702	0	0	TMTC1
LONRF3	0	1.94572	0.289	0.08	0	0	LONRF3
KCTD8	0	0.563945	0.925	0.718	0	0	KCTD8
AC010230.1	0	2.38607	0.319	0.113	0	0	AC010230.1
KIRREL3	0	0.86528	0.995	0.79	0	0	KIRREL3
FAM19A1	0	0.198559	0.985	0.784	0	0	FAM19A1
SGCD	0	0.819252	0.936	0.738	0	0	SGCD
AC007563.2	0	0.812303	0.893	0.696	0	0	AC007563.2
AL050403.2	0	2.45805	0.273	0.076	0	0	AL050403.2
GAREM1	0	0.754717	0.881	0.684	0	0	GAREM1
GRIK4	0	0.788433	0.899	0.703	0	0	GRIK4
MAP3K5	0	0.827662	0.953	0.759	0	0	MAP3K5
SDK1	0	1.17962	0.756	0.563	0	0	SDK1
ENC1	0	0.991592	0.959	0.767	0	0	ENC1
MFSD4A	0	0.960602	0.719	0.533	0	0	MFSD4A
CDH12	0	0.629944	0.991	0.807	0	0	CDH12
TYW1B	0	0.883008	0.787	0.604	0	0	TYW1B
AL591501.1	0	0.942858	0.783	0.601	0	0	AL591501.1
PPARGC1A	0	0.907092	0.78	0.598	0	0	PPARGC1A
NUP93	0	0.807927	0.837	0.655	0	0	NUP93
RFTN1	0	0.912673	0.869	0.689	0	0	RFTN1
KIF13A	0	1.25925	0.958	0.779	0	0	KIF13A
PRKCA	0	1.14151	0.981	0.802	0	0	PRKCA
GALNT18	0	0.863982	0.963	0.786	0	0	GALNT18
RPS6KA2	0	0.619626	0.983	0.807	0	0	RPS6KA2
CDK19	0	0.908013	0.911	0.739	0	0	CDK19
TUT7	0	0.94294	0.757	0.585	0	0	TUT7
EPHX4	0	0.86011	0.758	0.587	0	0	EPHX4
IPO5	0	0.894281	0.771	0.601	0	0	IPO5
SNTB2	0	0.865239	0.834	0.666	0	0	SNTB2
TMEM65	0	0.817136	0.821	0.657	0	0	TMEM65
CAMK2N1	0	0.80815	0.893	0.73	0	0	CAMK2N1
LY86-AS1	0	0.760534	0.918	0.756	0	0	LY86-AS1
SYN3	0	1.19645	0.995	0.834	0	0	SYN3
DLEU2	0	0.836904	0.885	0.726	0	0	DLEU2
ST6GALNAC5	0	0.377225	0.985	0.827	0	0	ST6GALNAC5
DIAPH2	0	1.02919	0.962	0.805	0	0	DIAPH2
RGS6	0	0.341167	0.988	0.832	0	0	RGS6
FAM153C	0	0.81804	0.821	0.667	0	0	FAM153C
PTPN13	0	0.967067	0.755	0.602	0	0	PTPN13
CDC40	0	0.802588	0.858	0.708	0	0	CDC40
KCNK1	0	0.964177	0.919	0.771	0	0	KCNK1
RAPH1	0	0.856602	0.897	0.752	0	0	RAPH1
PAM	0	0.877056	0.954	0.81	0	0	PAM
MALT1	0	0.785628	0.799	0.656	0	0	MALT1
UPP2	0	0.874527	0.898	0.756	0	0	UPP2
DOK6	0	1.01472	0.951	0.809	0	0	DOK6
PTK2B	0	0.673075	0.942	0.8	0	0	PTK2B
GRID2	0	0.51159	0.991	0.851	0	0	GRID2
TRERF1	0	0.665138	0.891	0.752	0	0	TRERF1
ABLIM1	0	1.24511	0.975	0.839	0	0	ABLIM1
RPS6KA5	0	0.871849	0.911	0.777	0	0	RPS6KA5
ABI1	0	0.745288	0.884	0.752	0	0	ABI1
DGKB	0	1.24156	0.999	0.872	0	0	DGKB
DAB1	0	0.895988	0.995	0.869	0	0	DAB1
PKIG	0	0.806435	0.866	0.74	0	0	PKIG
EML5	0	0.935336	0.896	0.771	0	0	EML5
LINC01122	0	0.817839	0.972	0.847	0	0	LINC01122
LRRC8B	0	0.803452	0.936	0.815	0	0	LRRC8B
FRMD5	0	0.668939	0.982	0.861	0	0	FRMD5
TCAF1	0	0.673817	0.872	0.752	0	0	TCAF1
AC098850.3	0	1.09051	0.972	0.853	0	0	AC098850.3
PCDH7	0	0.755795	0.998	0.879	0	0	PCDH7
PLXNA4	0	0.6648	0.979	0.86	0	0	PLXNA4
SEZ6L	0	0.896781	0.971	0.852	0	0	SEZ6L
MPP6	0	0.66618	0.909	0.791	0	0	MPP6
PRKCI	0	0.702404	0.845	0.728	0	0	PRKCI
TLK1	0	0.557697	0.942	0.829	0	0	TLK1
HS6ST3	0	1.0444	0.999	0.893	0	0	HS6ST3
TMEM108	0	0.547041	0.991	0.886	0	0	TMEM108
ELL2	0	0.672283	0.923	0.819	0	0	ELL2
EPB41L2	0	1.0414	0.991	0.887	0	0	EPB41L2
ARNT2	0	1.1332	0.981	0.878	0	0	ARNT2
ARFGEF3	0	0.818363	0.979	0.879	0	0	ARFGEF3
NTRK3	0	0.869145	0.986	0.886	0	0	NTRK3
CNTNAP5	0	0.420877	0.995	0.896	0	0	CNTNAP5
KCTD1	0	0.674174	0.973	0.874	0	0	KCTD1
LNX1	0	0.640865	0.942	0.843	0	0	LNX1
KIAA1211L	0	0.637458	0.974	0.876	0	0	KIAA1211L
PTPRR	0	0.581049	0.95	0.852	0	0	PTPRR
ADGRL2	0	0.94513	0.995	0.898	0	0	ADGRL2
DCLK2	0	0.816692	0.97	0.873	0	0	DCLK2
CACNA1E	0	0.80725	0.986	0.893	0	0	CACNA1E
GRIA4	0	1.27661	0.999	0.906	0	0	GRIA4
VGLL4	0	0.672375	0.927	0.835	0	0	VGLL4
KCND2	0	1.40718	0.995	0.903	0	0	KCND2
KCTD16	0	0.790307	0.998	0.906	0	0	KCTD16
SLC44A1	0	0.594442	0.957	0.865	0	0	SLC44A1
LONRF2	0	0.736984	0.933	0.842	0	0	LONRF2
NETO1	0	0.559565	0.968	0.879	0	0	NETO1
RIMBP2	0	0.598753	0.955	0.866	0	0	RIMBP2
XIST	0	0.596435	0.806	0.719	0	0	XIST
GRK3	0	0.725013	0.932	0.846	0	0	GRK3
DTNB	0	0.688012	0.973	0.888	0	0	DTNB
LINC01250	0	0.615648	0.947	0.862	0	0	LINC01250
NLK	0	0.632149	0.977	0.893	0	0	NLK
ATP6V1H	0	0.709742	0.951	0.868	0	0	ATP6V1H
WASF1	0	0.539811	0.964	0.881	0	0	WASF1
PCSK2	0	0.575486	0.983	0.901	0	0	PCSK2
CHRM3	0	0.651241	0.999	0.918	0	0	CHRM3
ITPR1	0	0.761524	0.985	0.904	0	0	ITPR1
DPYD	0	0.534866	0.985	0.906	0	0	DPYD
HYDIN	0	0.582952	0.959	0.882	0	0	HYDIN
EML6	0	0.620454	0.972	0.897	0	0	EML6
AK5	0	0.541225	0.993	0.921	0	0	AK5
NBAS	0	0.526592	0.973	0.902	0	0	NBAS
AMPH	0	0.645814	0.983	0.913	0	0	AMPH
DTNA	0	0.497434	0.99	0.921	0	0	DTNA
ROCK2	0	0.512388	0.976	0.908	0	0	ROCK2
VSNL1	0	0.502002	0.976	0.908	0	0	VSNL1
CACNB2	0	0.78449	0.995	0.928	0	0	CACNB2
RFX3	0	0.513385	0.984	0.917	0	0	RFX3
RPS6KC1	0	0.518506	0.986	0.919	0	0	RPS6KC1
MAP7	0	0.647519	0.989	0.923	0	0	MAP7
NFAT5	0	0.607611	0.976	0.91	0	0	NFAT5
CAMK2A	0	0.504768	0.988	0.923	0	0	CAMK2A
BTBD9	0	0.848141	0.994	0.93	0	0	BTBD9
TMEM178B	0	0.622114	0.992	0.928	0	0	TMEM178B
PSD3	0	0.548272	0.979	0.917	0	0	PSD3
ERC1	0	0.519059	0.978	0.917	0	0	ERC1
MBNL2	0	0.498674	0.985	0.924	0	0	MBNL2
ADAM23	0	0.469295	0.987	0.927	0	0	ADAM23
TANC2	0	0.727085	0.993	0.933	0	0	TANC2
SORBS1	0	0.772843	0.991	0.932	0	0	SORBS1
FBXW7	0	0.469962	0.984	0.927	0	0	FBXW7
TTC3	0	0.479966	0.998	0.943	0	0	TTC3
KCNQ5	0	0.38515	0.999	0.947	0	0	KCNQ5
LRRTM4	0	0.681267	1	0.948	0	0	LRRTM4
PLEKHA5	0	0.579451	0.997	0.945	0	0	PLEKHA5
SIPA1L1	0	0.84742	0.998	0.946	0	0	SIPA1L1
STXBP5	0	0.394886	0.991	0.939	0	0	STXBP5
GRIN2B	0	0.402707	0.996	0.946	0	0	GRIN2B
IQCJ-SCHIP1	0	0.371591	1	0.951	0	0	IQCJ-SCHIP1
PTK2	0	0.439676	0.996	0.947	0	0	PTK2
CACNA2D1	0	0.513161	0.99	0.942	0	0	CACNA2D1
DPP6	0	0.693073	0.999	0.951	0	0	DPP6
ATP2B1	0	0.509161	0.995	0.948	0	0	ATP2B1
CDH18	0	0.88564	0.999	0.953	0	0	CDH18
PRKCB	0	0.459613	0.996	0.951	0	0	PRKCB
RAPGEF5	0	0.45142	0.989	0.944	0	0	RAPGEF5
PPFIA2	0	0.799346	0.998	0.957	0	0	PPFIA2
R3HDM1	0	0.443196	0.998	0.957	0	0	R3HDM1
ADGRL3	0	0.370336	1	0.967	0	0	ADGRL3
ATRNL1	0	0.426468	0.998	0.965	0	0	ATRNL1
IL1RAPL1	0	0.570651	0.998	0.965	0	0	IL1RAPL1
GRIA2	0	0.376787	0.999	0.971	0	0	GRIA2
KCNIP4	0	0.537537	1	0.972	0	0	KCNIP4
DLGAP1	0	0.511912	1	0.975	0	0	DLGAP1
CSMD1	0	0.297511	1	0.984	0	0	CSMD1
MALAT1	0	0.372454	1	1	0	0	MALAT1
P2RX7	2.47032822920623e-323	0.756737	0.829	0.654	7.26795268314766e-319	0	P2RX7
AL139158.2	4.49105672069693e-321	1.63874	0.369	0.135	1.32131379779624e-316	0	AL139158.2
FSTL4	1.62745223740107e-320	0.436786	0.978	0.858	4.78812722765768e-316	0	FSTL4
MPPED2	1.69711549346468e-320	0.700593	0.856	0.684	4.99308349332244e-316	0	MPPED2
MTHFD1	3.80331734168592e-320	1.07432	0.598	0.407	1.11897399509741e-315	0	MTHFD1
LMO3	1.83234300972382e-315	0.499367	0.969	0.893	5.39093636890844e-311	0	LMO3
GOLGA8A	3.57224943984299e-315	0.696896	0.885	0.775	1.05099150769621e-310	0	GOLGA8A
SLIT2	1.19303591908815e-314	0.287023	0.897	0.656	3.51003097754925e-310	0	SLIT2
ST8SIA3	2.6025395800323e-313	0.648297	0.878	0.754	7.65693169841304e-309	0	ST8SIA3
CTDSPL	4.40198092981319e-313	0.519908	0.95	0.87	1.29510680936034e-308	0	CTDSPL
CIT	8.46660008121611e-313	0.479324	0.968	0.877	2.49095840989459e-308	0	CIT
OGA	2.69320225233041e-312	0.49161	0.942	0.865	7.92367034658131e-308	0	OGA
ST3GAL1	1.78538992979125e-310	0.960941	0.681	0.438	5.25279571243883e-306	0	ST3GAL1
SESN1	3.28516966125867e-310	0.561535	0.916	0.838	9.66529766038915e-306	0	SESN1
AL117329.1	3.93644882473086e-309	0.550247	0.865	0.63	1.15814260872407e-304	0	AL117329.1
CCDC6	6.78179027816422e-309	0.633911	0.885	0.782	1.99527051773869e-304	0	CCDC6
FLRT2	6.90663727898895e-308	0.432057	0.99	0.905	2.03200175385134e-303	0	FLRT2
FAM213A	1.31610282645808e-307	0.812063	0.727	0.545	3.87210612572232e-303	0	FAM213A
EML1	8.08801487145371e-306	0.832597	0.767	0.604	2.3795748553304e-301	0	EML1
FGFR2	1.37901107549616e-305	1.2648	0.428	0.183	4.05718848521725e-301	0	FGFR2
CTNNAL1	4.87164605838471e-303	0.744686	0.822	0.658	1.43328698683737e-298	0	CTNNAL1
SHC3	9.68413983784305e-303	0.555107	0.923	0.829	2.8491707816918e-298	0	SHC3
MAL2	6.71874889113172e-302	0.898877	0.705	0.54	1.97672311125986e-297	0	MAL2
PDE1A	8.92535945896698e-301	0.357751	0.993	0.872	2.62593000642268e-296	0	PDE1A
NPTXR	2.71867577808524e-300	0.84468	0.762	0.54	7.9986160067046e-296	0	NPTXR
AC015468.3	1.57967360438213e-298	2.00233	0.283	0.089	4.64755771145267e-294	0	AC015468.3
SPECC1	6.04193563050249e-298	0.564367	0.908	0.822	1.77759788185014e-293	0	SPECC1
ERCC6L2	1.19091369624873e-297	0.588844	0.924	0.82	3.50378718573338e-293	0	ERCC6L2
FBXO32	7.13387469469442e-297	0.809657	0.794	0.643	2.09885727392604e-292	0	FBXO32
ZNF831	2.55077038286497e-296	0.946107	0.694	0.501	7.50462154342702e-292	0	ZNF831
PDE7B	1.80473228148996e-295	1.01441	0.666	0.422	5.30970284537162e-291	0	PDE7B
RFX2	5.12040204832812e-294	1.28238	0.493	0.268	1.50647348663862e-289	0	RFX2
TTC28	1.89530616608916e-292	0.480935	0.961	0.877	5.57618027125091e-288	0	TTC28
SPRY1	3.66578126539162e-292	2.05659	0.268	0.082	1.07850950609087e-287	0	SPRY1
PITPNM2	4.13987772160459e-292	0.686486	0.847	0.718	1.21799342447329e-287	0	PITPNM2
STEAP2	9.60814764463025e-292	0.744166	0.763	0.587	2.82681311852667e-287	0	STEAP2
CAT	1.41426500967594e-287	1.55396	0.362	0.145	4.16090908496758e-283	0	CAT
GABRA4	1.69362838867205e-287	0.591607	0.9	0.78	4.98282408231204e-283	0	GABRA4
TENM2	2.42470050380635e-286	0.296081	0.999	0.915	7.13371135224866e-282	0	TENM2
MYH9	3.2880278432321e-286	0.792174	0.756	0.584	9.67370671757315e-282	0	MYH9
MLIP	3.73274305238508e-285	0.547091	0.931	0.839	1.09821033344221e-280	0	MLIP
KIF26B	1.11847678175042e-284	1.06897	0.602	0.396	3.2906705395879e-280	0	KIF26B
RCAN2	1.70929376258517e-284	0.512861	0.931	0.847	5.02891317890183e-280	0	RCAN2
KIAA2012	4.54445390303022e-284	1.10256	0.578	0.333	1.33702378281052e-279	0	KIAA2012
BRINP1	3.8299363691735e-282	0.511744	0.954	0.878	1.12680557917454e-277	0	BRINP1
DOCK10	5.03280225066665e-282	1.2958	0.391	0.167	1.48070075016863e-277	0	DOCK10
EXOC6B	6.90238189908492e-281	0.395875	0.987	0.934	2.03074977852977e-276	0	EXOC6B
FBXO34	3.04335740675364e-279	0.526088	0.924	0.846	8.95386182640989e-275	0	FBXO34
QKI	2.29961354675144e-278	0.454295	0.813	0.589	6.76569301589741e-274	0	QKI
NPTX2	4.63397753230512e-278	1.69782	0.282	0.088	1.36336252977949e-273	0	NPTX2
CAMKK1	5.59648798932035e-278	0.703805	0.804	0.673	1.64654273133794e-273	0	CAMKK1
SPOCK3	7.77890636158347e-278	0.837527	0.642	0.397	2.28863204064147e-273	0	SPOCK3
KCNMA1	8.8817473870154e-278	0.276315	0.999	0.96	2.6130988987338e-273	0	KCNMA1
FAT4	2.22573502398142e-277	1.79012	0.271	0.081	6.54833501405573e-273	0	FAT4
ANO5	3.70788914822176e-277	0.502635	0.934	0.851	1.09089806629832e-272	0	ANO5
MTMR2	4.93542596658085e-276	0.703003	0.785	0.663	1.45205167362775e-271	0	MTMR2
MICAL3	1.05080945811643e-275	0.413253	0.983	0.914	3.09158650672434e-271	0	MICAL3
FGFR1OP2	4.4370985303887e-275	0.634593	0.846	0.699	1.30543875862566e-270	0	FGFR1OP2
MTA3	6.7946502886229e-275	0.521556	0.931	0.841	1.99905406141575e-270	0	MTA3
BICC1	2.81041964625123e-274	0.777648	0.759	0.605	8.26853564123574e-270	0	BICC1
INPP5A	4.82673868484534e-274	0.704478	0.785	0.675	1.42007478846835e-269	0	INPP5A
MAN1C1	1.07791794269301e-273	0.555176	0.91	0.785	3.17134237919712e-269	0	MAN1C1
USP25	1.34426220116819e-273	0.496057	0.949	0.875	3.95495382205692e-269	0	USP25
RTN4	3.83696262218896e-273	0.370591	0.975	0.919	1.12887277307422e-268	0	RTN4
SLF1	1.11868388930241e-272	0.591801	0.859	0.75	3.29127987071662e-268	0	SLF1
MBNL1	1.55808915395066e-271	0.423904	0.967	0.91	4.58405409983824e-267	0	MBNL1
TMEM132E	2.42835002418994e-271	1.74557	0.313	0.118	7.14444860616922e-267	0	TMEM132E
CREG2	1.47519722095167e-268	0.603893	0.844	0.671	4.3401777437619e-264	0	CREG2
BTBD8	1.39521639136657e-266	0.529115	0.919	0.825	4.1048661450396e-262	0	BTBD8
MBTPS1	3.42753498684333e-266	0.642434	0.827	0.712	1.00841506847918e-261	0	MBTPS1
ZFR	9.90688103073358e-265	0.508675	0.913	0.827	2.91470346805213e-260	0	ZFR
LINC01102	1.58415340853178e-264	1.12824	0.553	0.334	4.66073774324136e-260	0	LINC01102
EDIL3	2.03770643377635e-264	0.632823	0.906	0.731	5.99513609881339e-260	0	EDIL3
RPS6KA6	5.95823360878994e-264	0.673679	0.794	0.672	1.75297191004209e-259	0	RPS6KA6
PRKCG	1.40289760133084e-263	0.967634	0.624	0.423	4.12746503287546e-259	0	PRKCG
CPSF6	2.93174124232492e-263	0.53803	0.89	0.807	8.62547590904416e-259	0	CPSF6
ANKRD28	4.58898704284302e-263	0.491863	0.911	0.829	1.35012587787484e-258	0	ANKRD28
ACTR3B	7.14004390267386e-261	0.638868	0.81	0.692	2.10067231660568e-256	0	ACTR3B
BDNF	1.72502812216442e-256	1.50311	0.319	0.118	5.07520523821994e-252	0	BDNF
FHOD3	8.63948736517875e-255	0.495245	0.921	0.771	2.54182357770924e-250	0	FHOD3
TTLL11	1.03753565730963e-254	0.479118	0.908	0.843	3.05253365737065e-250	0	TTLL11
HRH2	2.93498335462839e-253	0.713575	0.746	0.612	8.63501452765219e-249	0	HRH2
CTXN3	4.48625386219727e-252	1.51844	0.283	0.095	1.31990074879706e-247	0	CTXN3
C10orf67	1.12725053862437e-251	1.60788	0.337	0.144	3.31648380968676e-247	0	C10orf67
CCDC144NL	3.16117636252013e-251	1.22723	0.465	0.254	9.30049697617048e-247	0	CCDC144NL
CCNH	6.48832341485854e-250	0.542241	0.913	0.84	1.90892963188553e-245	0	CCNH
ATP9B	2.65910029263134e-249	0.427163	0.955	0.889	7.82333897095067e-245	0	ATP9B
TNPO1	1.05883598412195e-248	0.482145	0.938	0.857	3.1152013488852e-244	0	TNPO1
TYW1	2.10831469288897e-248	0.632449	0.796	0.681	6.20287265794864e-244	0	TYW1
FEM1C	5.6014375076871e-248	1.15481	0.47	0.276	1.64799892913662e-243	0	FEM1C
ITGB8	2.86061480252373e-247	0.633574	0.686	0.437	8.41621481050507e-243	0	ITGB8
WDFY2	2.83319844311371e-246	0.722657	0.753	0.594	8.33555313948485e-242	0	WDFY2
NBPF11	7.41904307140857e-246	1.10314	0.496	0.31	2.18275666203912e-241	0	NBPF11
RNF115	1.66577275677237e-245	0.526458	0.898	0.814	4.90087002769998e-241	0	RNF115
ATP7B	5.60684422747954e-245	1.07762	0.524	0.341	1.64958964016676e-240	0	ATP7B
BTG1	3.00983751845504e-244	1.39733	0.356	0.159	8.85524296304657e-240	0	BTG1
KDM1B	5.03491460372461e-244	0.984989	0.591	0.408	1.48132222556182e-239	0	KDM1B
CEP126	6.01369176381476e-244	0.51187	0.929	0.844	1.76928825383194e-239	0	CEP126
CSMD3	8.38321250215983e-244	0.264368	0.998	0.954	2.46642495026044e-239	0	CSMD3
NGEF	9.33507822506002e-242	0.55004	0.875	0.76	2.74647336459491e-237	0	NGEF
DOK5	5.80421329323707e-241	0.882901	0.668	0.47	1.70765759300328e-236	0	DOK5
CERKL	1.04506098416303e-239	1.62294	0.302	0.115	3.07467392150604e-235	0	CERKL
GFOD1	3.32031539054306e-238	0.434095	0.948	0.868	9.76869991051675e-234	0	GFOD1
EXPH5	4.76601344932766e-238	1.72751	0.258	0.085	1.40220881692669e-233	0	EXPH5
DTWD1	4.88755180068286e-238	0.62737	0.807	0.696	1.4379666152789e-233	0	DTWD1
KIAA1257	7.75794274316916e-238	1.09951	0.509	0.32	2.2824643344678e-233	0	KIAA1257
OPN3	2.73167246296109e-236	0.844886	0.656	0.491	8.03685355327782e-232	0	OPN3
TMEM47	5.06424006606925e-236	1.60217	0.269	0.094	1.48995006983824e-231	0	TMEM47
SLC9A7	8.39867940751041e-236	0.801028	0.667	0.49	2.47097546848364e-231	0	SLC9A7
DOCK4	1.56672088580696e-235	0.331974	0.986	0.929	4.60944951813267e-231	0	DOCK4
SFT2D2	5.50962815634328e-235	1.56536	0.306	0.118	1.62098769987775e-230	0	SFT2D2
EPHA4	1.5211807228618e-234	0.375017	0.976	0.883	4.47546580473169e-230	0	EPHA4
RAPGEF2	7.56115528949792e-234	0.325249	0.992	0.939	2.22456749772318e-229	0	RAPGEF2
ZNF609	1.29620663705515e-233	0.429976	0.952	0.875	3.81356954687997e-229	0	ZNF609
SRPK1	3.62363028486174e-233	0.569282	0.843	0.754	1.06610826610917e-228	0	SRPK1
CCBE1	6.28622082565755e-233	0.948244	0.525	0.3	1.84946902911671e-228	0	CCBE1
PHTF2	1.61750557883544e-231	0.501536	0.878	0.791	4.75886316349175e-227	0	PHTF2
LRFN2	1.84062063514127e-231	0.476463	0.943	0.845	5.41528997064913e-227	0	LRFN2
SLITRK5	2.37021045381797e-231	0.513495	0.885	0.789	6.97339617617785e-227	0	SLITRK5
SSFA2	3.61104616306775e-231	0.719064	0.737	0.595	1.06240589163616e-226	0	SSFA2
CLASP1	3.76594239134627e-230	0.329031	0.984	0.929	1.10797791095799e-225	0	CLASP1
SYNE1	5.04690870702496e-230	0.273412	0.998	0.957	1.48485101069381e-225	0	SYNE1
FNDC3A	2.23626696994988e-229	0.458033	0.915	0.833	6.57932105228953e-225	0	FNDC3A
RMDN2	1.00478644838468e-228	0.89071	0.623	0.452	2.95618220979257e-224	0	RMDN2
PTCH1	5.66440622578044e-227	1.19502	0.451	0.261	1.66652495568686e-222	0	PTCH1
SH3BGRL2	9.46046546832732e-224	0.502299	0.889	0.796	2.78336354543658e-219	0	SH3BGRL2
RYK	1.59692437237266e-223	0.510449	0.876	0.793	4.6983111959576e-219	0	RYK
CAMK2B	1.00078654790146e-222	0.416473	0.955	0.869	2.94441410258089e-218	0	CAMK2B
MEF2A	7.78273796854845e-222	0.386465	0.961	0.892	2.28975933772664e-217	0	MEF2A
ST3GAL5	2.09757380754081e-221	0.720716	0.695	0.542	6.17127189916583e-217	0	ST3GAL5
CHN1	3.06523627870471e-221	0.292653	0.994	0.95	9.01823165557712e-217	0	CHN1
NR3C2	2.1047700482039e-220	0.372041	0.967	0.888	6.1924439588207e-216	0	NR3C2
ASTN1	9.2552897592665e-220	0.350097	0.978	0.915	2.7229988000738e-215	0	ASTN1
EEPD1	1.05816904370797e-219	0.886163	0.607	0.406	3.11323914349323e-215	0	EEPD1
TSPAN3	1.16153442236199e-219	0.635525	0.766	0.636	3.41735042403121e-215	0	TSPAN3
AC092902.3	1.42889206409923e-219	0.753548	0.687	0.486	4.20394334178634e-215	0	AC092902.3
SORT1	1.47370018220569e-219	0.403376	0.935	0.848	4.33577330606737e-215	0	SORT1
NIN	4.10205508534803e-219	0.354935	0.971	0.903	1.20686562666024e-214	0	NIN
DUSP16	1.38053164802055e-218	1.01849	0.518	0.325	4.06166216164125e-214	0	DUSP16
PRKAR2B	1.62507554283733e-218	0.42275	0.934	0.855	4.78113475458171e-214	0	PRKAR2B
TYRO3	2.15204500917957e-218	0.694143	0.714	0.544	6.33153162150721e-214	0	TYRO3
NBN	7.30390667488081e-218	0.72342	0.69	0.544	2.14888238281668e-213	0	NBN
MIR222HG	1.06359433045078e-217	0.690762	0.765	0.629	3.12920087961924e-213	0	MIR222HG
PLXNA2	1.36220002356485e-217	0.44175	0.935	0.843	4.00772868933015e-213	0	PLXNA2
ARHGAP26	3.05329984083333e-217	0.30699	0.992	0.941	8.98311346171573e-213	0	ARHGAP26
CHL1	4.28130183018443e-215	0.319021	0.985	0.931	1.25960181145856e-210	0	CHL1
GUCY1A2	7.70091519818522e-215	0.306985	0.984	0.901	2.26568626045807e-210	0	GUCY1A2
SNED1	1.99546015953768e-214	0.495179	0.886	0.716	5.87084333537581e-210	0	SNED1
USP47	3.9150419483162e-214	0.406679	0.95	0.882	1.15184449161411e-209	0	USP47
GRIK2	2.01260562473124e-212	0.233725	0.997	0.954	5.92128700852179e-208	0	GRIK2
BZW2	9.97962949462941e-211	0.638012	0.751	0.626	2.93610679361492e-206	0	BZW2
UBASH3B	2.17362101636282e-210	1.16012	0.422	0.229	6.39501039224106e-206	0	UBASH3B
GLS	5.38813281367658e-210	0.32352	0.98	0.929	1.58524255511179e-205	0	GLS
PRAG1	1.79023072177367e-207	0.77789	0.644	0.44	5.26703780653032e-203	0	PRAG1
ZC3H14	4.29629271830322e-207	0.480068	0.868	0.794	1.26401228065199e-202	0	ZC3H14
AC078909.1	4.92012522283775e-207	1.65301	0.261	0.097	1.44755004181109e-202	0	AC078909.1
AC005972.4	1.73577492047959e-206	1.4535	0.32	0.147	5.10682339354301e-202	0	AC005972.4
LINC00390	4.65424558117758e-205	1.77175	0.25	0.095	1.36932559243826e-200	0	LINC00390
B3GAT1	8.60295025034307e-205	0.627627	0.756	0.604	2.53107399315344e-200	0	B3GAT1
CACNG3	2.04121310310753e-204	0.486699	0.914	0.81	6.00545307065268e-200	0	CACNG3
BRINP2	4.33635931679865e-204	0.473073	0.911	0.795	1.27580027459533e-199	0	BRINP2
LINC01197	5.60675212346088e-204	0.692451	0.684	0.477	1.64956254224342e-199	0	LINC01197
ERC2	2.1024492781182e-202	0.331602	0.996	0.953	6.18561602115155e-198	0	ERC2
NCAM2	2.7150700305058e-202	0.238044	0.994	0.931	7.98800753675113e-198	0	NCAM2
PI4KA	2.14070006216463e-201	0.339301	0.98	0.92	6.29815365289457e-197	0	PI4KA
SPRED1	9.67644075699058e-201	0.566682	0.802	0.692	2.8469056351142e-196	0	SPRED1
ROCK1	3.66677918235425e-200	0.46853	0.886	0.81	1.07880310324044e-195	0	ROCK1
ZNF365	4.17448411513913e-200	0.548032	0.899	0.813	1.22817497151508e-195	0	ZNF365
MATN2	6.97631513732616e-200	1.38313	0.337	0.168	2.05250167655273e-195	0	MATN2
SLC37A1	1.47572561316087e-199	0.853113	0.591	0.445	4.34173232648059e-195	0	SLC37A1
MYO1B	3.39888190430452e-199	0.946434	0.501	0.295	9.99985045065433e-195	0	MYO1B
IGSF11	1.7546550485679e-198	0.494378	0.869	0.711	5.16237061839161e-194	0	IGSF11
NPHP4	2.18043195384702e-198	0.649227	0.714	0.611	6.4150488514133e-194	0	NPHP4
RTN4RL1	1.09562953302141e-197	0.63506	0.791	0.632	3.22345164910229e-193	0	RTN4RL1
PLPPR4	3.10118906633439e-197	0.511942	0.875	0.79	9.12400835206241e-193	0	PLPPR4
HUWE1	5.570005747313e-196	0.468336	0.868	0.784	1.63875139091696e-191	0	HUWE1
NCKAP1	7.30416933463996e-196	0.358906	0.951	0.889	2.14895965994442e-191	0	NCKAP1
DAAM1	9.40726490430836e-196	0.431686	0.94	0.863	2.76771140749656e-191	0	DAAM1
FAM19A2	1.36589105016878e-195	0.16701	0.975	0.854	4.01858805870158e-191	0	FAM19A2
PCNT	1.39196911448793e-195	0.566964	0.831	0.73	4.09531233173493e-191	0	PCNT
LYST	2.24313918246421e-195	0.386254	0.94	0.867	6.59953978872795e-191	0	LYST
ICAM5	2.45004697061835e-195	1.09448	0.444	0.272	7.20828319225625e-191	0	ICAM5
SCHLAP1	1.49798581490415e-193	0.965732	0.525	0.325	4.4072240660295e-189	0	SCHLAP1
SLC4A10	3.08198110417648e-193	0.240225	0.995	0.955	9.06749660659761e-189	0	SLC4A10
TMEM132B	3.51015271615288e-193	0.273183	0.994	0.942	1.03272203061934e-188	0	TMEM132B
MTUS2	3.81290499912889e-193	0.275406	0.995	0.944	1.12179477979371e-188	0	MTUS2
FBLN7	6.30104006877743e-192	1.1254	0.37	0.181	1.85382899863501e-187	0	FBLN7
JUN	1.15620018860916e-190	0.998114	0.428	0.242	3.40165657490702e-186	0	JUN
TMEM132D	1.60378199073115e-190	0.15509	0.984	0.879	4.71848699493012e-186	0	TMEM132D
GLRA3	4.34598396571109e-190	0.591056	0.756	0.564	1.27863194255186e-185	0	GLRA3
TUB	1.51512126325476e-189	0.680638	0.682	0.543	4.45763826862182e-185	0	TUB
CDYL2	1.6209483000286e-188	0.536807	0.813	0.685	4.76899199351415e-184	0	CDYL2
NELL1	2.7294683266826e-185	0.505066	0.88	0.738	8.03036876393289e-181	0	NELL1
MAP2K1	2.67789842528542e-184	0.531797	0.813	0.708	7.87864495703224e-180	0	MAP2K1
ACTN4	3.03324119293807e-184	0.548431	0.81	0.687	8.92409891374309e-180	0	ACTN4
MTREX	3.95729317947713e-184	0.526615	0.797	0.708	1.16427522633397e-179	0	MTREX
PPARG	8.74337093809614e-184	0.869968	0.568	0.413	2.57238716369727e-179	0	PPARG
NOVA1	1.11134211648644e-183	0.343379	0.975	0.922	3.26967964091475e-179	0	NOVA1
SGK3	1.74799848291597e-183	0.571427	0.789	0.673	5.14278633658706e-179	0	SGK3
PRKDC	3.2629576619195e-183	0.432226	0.882	0.806	9.59994773713335e-179	0	PRKDC
NPTN	3.76984749727748e-183	0.35584	0.946	0.874	1.10912683217401e-178	0	NPTN
DGKA	6.76865599279531e-183	1.0655	0.422	0.254	1.99140627964031e-178	0	DGKA
BAIAP2	2.79960829162757e-182	0.498328	0.86	0.739	8.23672755479748e-178	0	BAIAP2
ATP11A	8.76856890264429e-182	0.616969	0.739	0.605	2.57980065684698e-177	0	ATP11A
PBX1	1.43571291174324e-181	0.274591	0.991	0.933	4.22401095763979e-177	0	PBX1
PRKD1	5.35368724325513e-181	0.415958	0.816	0.628	1.57510832383809e-176	0	PRKD1
TMEM196	5.61432126426864e-180	0.809732	0.586	0.39	1.65178945916048e-175	0	TMEM196
ATF2	2.50424490230997e-178	0.445829	0.852	0.783	7.36773892708616e-174	0	ATF2
ARHGAP6	1.65040588135934e-177	1.05711	0.298	0.129	4.8556591435473e-173	0	ARHGAP6
GOLGA8B	6.88431846063925e-177	0.525776	0.829	0.72	2.02543533430467e-172	0	GOLGA8B
ACTB	1.7316085459931e-176	0.562704	0.84	0.73	5.0945655031663e-172	0	ACTB
PPP3CA	3.72162729521536e-176	0.231515	0.996	0.958	1.09493996652531e-171	0	PPP3CA
LIN7A	7.09597734772662e-176	0.465587	0.878	0.789	2.08770749547465e-171	0	LIN7A
ATXN10	3.49852031403105e-175	0.393651	0.916	0.851	1.02929966159108e-170	0	ATXN10
PHACTR2	3.72556471048936e-175	0.5291	0.753	0.563	1.09609839347308e-170	0	PHACTR2
HTR4	5.02876612076118e-175	0.573444	0.547	0.337	1.47951328038915e-170	0	HTR4
LDB2	9.2099123241078e-175	0.217499	0.997	0.94	2.70964830487576e-170	0	LDB2
SLITRK4	2.32771833290257e-174	0.631731	0.699	0.546	6.84838010723266e-170	0	SLITRK4
SLC1A1	2.53429100865274e-174	0.643227	0.709	0.581	7.45613757655723e-170	0	SLC1A1
CDK6	1.53966072508094e-173	0.463012	0.819	0.646	4.52983581926062e-169	0	CDK6
NCDN	2.52997215594376e-173	0.574013	0.695	0.529	7.44343108000212e-169	0	NCDN
ATP11B	5.1076614747757e-173	0.507902	0.834	0.751	1.50272508249376e-168	0	ATP11B
NECTIN3-AS1	7.7888996420484e-173	1.15695	0.394	0.235	2.29157216368706e-168	0	NECTIN3-AS1
KBTBD11	1.47720663800746e-172	0.76079	0.561	0.399	4.34608964968176e-168	0	KBTBD11
AMZ1	1.92318290953977e-172	1.20257	0.358	0.195	5.65819643815696e-168	0	AMZ1
AMD1	2.82118738515764e-171	0.685812	0.64	0.504	8.30021540587229e-167	0	AMD1
LINC01605	3.75281879197234e-170	1.42121	0.279	0.126	1.10411681678618e-165	0	LINC01605
RECK	6.88537497630076e-170	0.58217	0.715	0.612	2.02574617177745e-165	0	RECK
ARPP19	1.09417462423772e-169	0.477901	0.838	0.718	3.21917116196979e-165	0	ARPP19
KCNB1	7.28975260131085e-169	0.341748	0.962	0.899	2.14471811283167e-164	0	KCNB1
PXYLP1	1.27156786625086e-168	0.603655	0.719	0.595	3.74107981929666e-164	0	PXYLP1
TIMP3	2.31530014418213e-168	0.833306	0.485	0.297	6.81184455419824e-164	0	TIMP3
RAB40B	7.84714047281022e-168	0.66276	0.666	0.528	2.30870719850549e-163	0	RAB40B
SPATA6L	1.00277292910695e-167	0.685341	0.673	0.535	2.95025823472555e-163	0	SPATA6L
DDX17	1.12667986855926e-167	0.327623	0.961	0.904	3.31480484128819e-163	0	DDX17
TRPS1	3.74131272666826e-167	0.398271	0.825	0.652	1.10073161731307e-162	0	TRPS1
SLC16A10	4.60066152872754e-167	0.696423	0.677	0.509	1.35356062836693e-162	0	SLC16A10
SNAP25	1.29778668445915e-166	0.212363	0.997	0.963	3.81821820434727e-162	0	SNAP25
KMT2C	2.00934877295567e-166	0.322435	0.967	0.904	5.91170502491287e-162	0	KMT2C
ZNF883	1.08146022073665e-165	1.0763	0.384	0.217	3.18176411542931e-161	0	ZNF883
SESN3	5.95841698927161e-165	0.426645	0.893	0.814	1.7530258624136e-160	0	SESN3
LIMCH1	1.00369203553714e-164	0.200891	0.994	0.939	2.95296233775381e-160	0	LIMCH1
AFF3	2.09547657887173e-164	0.274681	0.993	0.946	6.16510164269852e-160	0	AFF3
MAPK4	8.37673409922438e-164	0.486961	0.782	0.611	2.4645189393328e-159	0	MAPK4
CNTN3	1.00730104253538e-163	0.318877	0.942	0.819	2.96358039724333e-159	0	CNTN3
ZNF184	1.4899743979636e-163	1.03032	0.401	0.236	4.38365367624871e-159	0	ZNF184
HSPA12A	3.1168012592334e-163	0.379123	0.962	0.916	9.16994098479059e-159	0	HSPA12A
DAPK1	9.80626593950708e-163	0.311698	0.956	0.857	2.88510150206238e-158	0	DAPK1
NDFIP2	9.9834130502833e-163	0.386866	0.916	0.844	2.93721995352385e-158	0	NDFIP2
VSTM2B	1.25624340683896e-162	0.703411	0.65	0.514	3.69599372726092e-158	0	VSTM2B
E2F3	1.49169403873922e-162	0.554583	0.753	0.636	4.38871303137466e-158	0	E2F3
AP001993.1	3.53454417872511e-162	1.38004	0.286	0.138	1.03989824282271e-157	0	AP001993.1
OGT	3.77882786133969e-162	0.38952	0.875	0.798	1.11176894508475e-157	0	OGT
ANKRD42	2.42722408997404e-161	0.68819	0.614	0.498	7.14113599511262e-157	0	ANKRD42
CFAP54	2.02381147861874e-160	0.760036	0.587	0.43	5.95425575124419e-156	0	CFAP54
PDE2A	5.23581387112219e-160	0.507398	0.804	0.715	1.54042879902286e-155	0	PDE2A
PHYHIP	9.28209485995525e-160	0.467671	0.803	0.662	2.73088512874744e-155	0	PHYHIP
ARHGAP10	3.00150747904715e-158	0.700199	0.622	0.439	8.83073515410461e-154	0	ARHGAP10
GLMN	3.69077936665836e-158	0.520945	0.772	0.676	1.08586419746456e-153	0	GLMN
TCF12	5.54103306074845e-158	0.390983	0.872	0.806	1.6302273368028e-153	0	TCF12
SORCS1	1.95340186933724e-157	0.304959	0.95	0.85	5.74710363977709e-153	0	SORCS1
BRWD1	3.97014920705492e-157	0.319972	0.968	0.908	1.16805759820763e-152	0	BRWD1
SLC2A12	4.58691054154412e-157	0.962371	0.433	0.26	1.3495149504277e-152	0	SLC2A12
PTPRE	4.79161994032821e-157	0.434	0.887	0.792	1.40974250264396e-152	0	PTPRE
SLAIN1	9.3866144964596e-156	0.428942	0.851	0.774	2.76163585100338e-151	0	SLAIN1
NEK10	1.04212772692418e-155	0.436624	0.875	0.794	3.06604398538363e-151	0	NEK10
DTNBP1	1.95266708024846e-155	0.692575	0.612	0.475	5.744941816799e-151	0	DTNBP1
ANXA11	8.20089009918833e-155	0.5817	0.716	0.594	2.4127838760822e-150	0	ANXA11
CACNA1D	1.56481052756232e-154	0.303782	0.97	0.916	4.60382905314109e-150	0	CACNA1D
RIF1	6.46523596355993e-154	0.458848	0.836	0.747	1.90213707283897e-149	0	RIF1
ITGA7	6.98801729446079e-154	0.96742	0.32	0.159	2.05594456820331e-149	0	ITGA7
KCNH1	2.80658627335974e-153	0.400448	0.91	0.796	8.2572574748517e-149	0	KCNH1
RGS12	2.91879575313611e-153	0.514695	0.574	0.393	8.58738898530174e-149	0	RGS12
FKBP5	8.21983201390132e-153	0.475317	0.62	0.421	2.41835677680991e-148	0	FKBP5
VGF	6.93838678557652e-151	0.941569	0.314	0.155	2.04134277618447e-146	0	VGF
MAPK6	7.82028355713796e-151	0.62558	0.636	0.502	2.30080562534556e-146	0	MAPK6
FSIP1	8.53549828036495e-151	0.754834	0.58	0.441	2.51122894906617e-146	0	FSIP1
EP400	2.83963644179665e-150	0.436387	0.834	0.765	8.35449437540992e-146	0	EP400
MAP4K3	2.14365746711227e-149	0.322892	0.951	0.89	6.30685463399102e-145	0	MAP4K3
PTPRB	3.5133062209175e-149	0.579488	0.733	0.609	1.03364982325614e-144	0	PTPRB
FRY	1.37472565367003e-148	0.28246	0.979	0.921	4.04458034566261e-144	0	FRY
TTC8	4.9486491205501e-148	0.524922	0.73	0.639	1.45594205775705e-143	0	TTC8
GRIA1	2.78519342050717e-147	0.1444	0.99	0.908	8.19431756247414e-143	0	GRIA1
NCOA1	3.81690094988624e-147	0.248374	0.985	0.929	1.12297042846603e-142	0	NCOA1
DLGAP3	6.0695410619767e-147	0.569492	0.705	0.587	1.78571967584416e-142	0	DLGAP3
SORBS2	7.7897796891808e-147	0.207584	0.98	0.91	2.29183108235388e-142	0	SORBS2
EPB41L4A	1.09071646128559e-146	0.788981	0.372	0.2	3.20899690074832e-142	0	EPB41L4A
AC137770.1	1.22204249155113e-146	1.22515	0.255	0.111	3.59537121439257e-142	0	AC137770.1
PHIP	1.30541806118318e-146	0.417553	0.921	0.852	3.84067047780703e-142	0	PHIP
GABRB3	1.36633205610629e-146	0.216917	0.995	0.948	4.01988554227031e-142	0	GABRB3
BABAM2	1.66187297398725e-146	0.351037	0.938	0.88	4.88939647676789e-142	0	BABAM2
UNC13A	3.14857574819093e-146	0.396987	0.885	0.811	9.26342470875254e-142	0	UNC13A
KIF13B	8.33067351150485e-146	0.647797	0.611	0.496	2.45096745381984e-141	0	KIF13B
CHCHD3	1.16721104567322e-145	0.33352	0.923	0.865	3.43405161747517e-141	0	CHCHD3
DTWD2	1.31209311834666e-145	0.521529	0.741	0.627	3.86030916348772e-141	0	DTWD2
MAML3	1.67700984592781e-145	0.75733	0.546	0.38	4.93393066770422e-141	0	MAML3
MICU2	1.76722131703654e-145	0.399135	0.879	0.811	5.19934183685321e-141	0	MICU2
ATP1B1	6.26940487347931e-145	0.278595	0.933	0.847	1.84452160782635e-140	0	ATP1B1
ITPR2	6.68538370464565e-145	0.362436	0.766	0.617	1.9669067397438e-140	0	ITPR2
XPR1	6.83867889768912e-145	0.402282	0.874	0.796	2.01200771848912e-140	0	XPR1
FAM78B	1.18234866596871e-144	0.536164	0.743	0.639	3.47858801014655e-140	0	FAM78B
ACTN1	5.53585957163598e-144	0.369631	0.906	0.826	1.62870524457102e-139	0	ACTN1
RGMB	6.95779138486394e-144	0.816842	0.486	0.34	2.04705180334082e-139	0	RGMB
AHI1	2.13912421317014e-143	0.243574	0.991	0.944	6.29351734756786e-139	0	AHI1
PDIA5	1.81944989676393e-142	0.86729	0.457	0.296	5.35300354126915e-138	0	PDIA5
BCL11B	2.33458078269184e-142	0.311704	0.534	0.35	6.86857012075766e-138	0	BCL11B
TGFBR3	2.35233499716512e-142	1.17226	0.304	0.173	6.92080479515949e-138	0	TGFBR3
TMEM181	2.61460536157499e-142	0.460667	0.797	0.703	7.69243043428978e-138	0	TMEM181
UNC5B	9.15542307968114e-142	1.12022	0.315	0.165	2.69361702427299e-137	0	UNC5B
ZFPM2	1.26447637390899e-141	0.236682	0.969	0.878	3.72021593967763e-137	0	ZFPM2
LRP12	4.45991311963257e-141	0.47507	0.788	0.681	1.3121510389271e-136	0	LRP12
RNF19A	1.28176473534863e-140	0.439015	0.834	0.746	3.77108002786919e-136	0	RNF19A
HTR1E	2.81559967894525e-140	0.390683	0.91	0.815	8.28377581542482e-136	0	HTR1E
ADAM17	3.49005094585923e-140	0.499072	0.746	0.657	1.02680788878124e-135	0	ADAM17
AC013652.1	7.35794566370758e-140	0.709494	0.624	0.484	2.16478119371941e-135	0	AC013652.1
SIPA1L3	8.96668197507556e-140	0.483142	0.817	0.744	2.63808750388698e-135	0	SIPA1L3
SUB1	1.43008173408077e-139	0.562718	0.695	0.568	4.20744346983903e-135	0	SUB1
TAMM41	1.54916739321681e-139	0.559452	0.691	0.589	4.55780538758317e-135	0	TAMM41
UGGT2	1.68368136370783e-139	0.323008	0.949	0.886	4.95355894016482e-135	0	UGGT2
CAMSAP2	3.64935118133487e-139	0.28794	0.958	0.895	1.07367561106053e-134	0	CAMSAP2
FGF13	5.5600144644383e-139	0.530377	0.666	0.515	1.63581185558239e-134	0	FGF13
ENAH	2.00421496924615e-138	0.467243	0.788	0.675	5.89660086101909e-134	0	ENAH
CELF2	2.21143678018912e-138	0.153652	1	0.97	6.50626815099441e-134	0	CELF2
MYCBP2	4.96539059504257e-138	0.188986	0.995	0.949	1.46086756696747e-133	0	MYCBP2
MIS18BP1	5.65547742024418e-138	0.745448	0.551	0.411	1.66389801181004e-133	0	MIS18BP1
PEX1	5.75644328630408e-138	0.629063	0.609	0.485	1.69360317926352e-133	0	PEX1
TET3	8.95868167865114e-138	0.476414	0.79	0.707	2.63573373667595e-133	0	TET3
ANKRD11	2.00010458269834e-137	0.282729	0.976	0.919	5.88450769275679e-133	0	ANKRD11
LRRN1	3.64602411246034e-137	0.516181	0.721	0.558	1.07269675412696e-132	0	LRRN1
BTBD3	4.91455125844602e-137	0.526325	0.712	0.581	1.4459101257474e-132	0	BTBD3
FANCL	1.31491897901634e-136	0.551305	0.728	0.626	3.86862312816399e-132	0	FANCL
NECAB1	1.8524357603605e-136	0.176643	0.973	0.882	5.45005125055662e-132	0	NECAB1
FAM133B	3.19343280530482e-136	0.633875	0.611	0.5	9.39539865648732e-132	0	FAM133B
ADAM9	5.03722778956638e-136	0.548882	0.679	0.585	1.48200278796832e-131	0	ADAM9
ACAP2	3.45686749236748e-135	0.347672	0.907	0.846	1.01704498492944e-130	0	ACAP2
RIPK2	3.63740245071729e-135	0.940154	0.404	0.262	1.07016017502553e-130	0	RIPK2
ADAMTS9-AS2	6.17369867092302e-135	0.790771	0.474	0.3	1.81636388597226e-130	0	ADAMTS9-AS2
NME7	6.88891338291164e-135	0.352296	0.902	0.835	2.02678720638643e-130	0	NME7
GABRB1	7.81681378921811e-135	0.218305	0.99	0.942	2.29978478492586e-130	0	GABRB1
CCPG1	1.71576803322756e-134	0.305724	0.958	0.897	5.04796113055882e-130	0	CCPG1
EGR3	2.10876620380896e-134	1.07906	0.303	0.16	6.20420104822634e-130	0	EGR3
MIA3	2.29027001279338e-134	0.480069	0.755	0.663	6.7382034046394e-130	0	MIA3
NIPAL2	8.47567588293328e-134	0.413796	0.867	0.793	2.4936286015178e-129	0	NIPAL2
BCLAF1	1.78232348385526e-133	0.383521	0.861	0.787	5.24377392185057e-129	0	BCLAF1
AC138305.1	8.69744628018367e-133	1.03543	0.328	0.18	2.55887567009284e-128	0	AC138305.1
BTRC	9.01182618953524e-133	0.309941	0.93	0.872	2.65136938322316e-128	0	BTRC
KSR2	1.15122397868122e-132	0.2202	0.986	0.934	3.38701606767801e-128	0	KSR2
TNFRSF25	7.7795305030673e-132	0.614905	0.636	0.516	2.28881566930743e-127	0	TNFRSF25
ARMC3	8.8484687217493e-132	1.06931	0.32	0.192	2.60330798262586e-127	0	ARMC3
RAB11FIP1	4.50652844778442e-131	0.957145	0.401	0.25	1.32586573462265e-126	0	RAB11FIP1
OLFM1	5.92701095834618e-131	0.347475	0.886	0.785	1.74378589405503e-126	0	OLFM1
SSX2IP	3.21804820107662e-130	0.38335	0.883	0.808	9.46781961238752e-126	0	SSX2IP
GPATCH2	1.69904491412548e-129	0.438215	0.823	0.726	4.99876004184858e-125	0	GPATCH2
DKK3	2.45160501749299e-129	0.360385	0.857	0.748	7.21286712196612e-125	0	DKK3
DNMT3A	2.62736895022046e-129	0.401109	0.868	0.792	7.72998218844363e-125	0	DNMT3A
SCRN1	3.210403587081e-129	0.457342	0.765	0.672	9.445328393551e-125	0	SCRN1
TMSB4X	4.11829051427551e-129	0.610048	0.676	0.575	1.211642252205e-124	0	TMSB4X
CFLAR	6.03417910224443e-129	0.864039	0.367	0.212	1.77531583367133e-124	0	CFLAR
MLLT1	1.13096838288048e-128	0.947319	0.383	0.243	3.32742207927265e-124	0	MLLT1
WIPF3	1.07906965237553e-127	0.421807	0.817	0.694	3.17473082425403e-123	0	WIPF3
GPR22	1.22975632517004e-127	0.662249	0.572	0.434	3.61806608428279e-123	0	GPR22
STXBP5L	1.37636719251023e-127	0.118965	1	0.964	4.04940991708434e-123	0	STXBP5L
GABRA2	1.5201102486135e-127	0.408851	0.881	0.781	4.47231636244578e-123	0	GABRA2
RPL32	2.44001849568998e-127	0.838661	0.413	0.276	7.1787784161695e-123	0	RPL32
TLE1	2.97183200455344e-127	0.657487	0.563	0.402	8.74342694059668e-123	0	TLE1
THSD4-AS1	3.82823104865362e-127	0.845594	0.442	0.298	1.12630385682438e-122	0	THSD4-AS1
IFRD1	7.62945482064503e-127	0.588545	0.605	0.496	2.24466190278197e-122	0	IFRD1
PCDH17	1.01557322555656e-126	0.445701	0.763	0.621	2.98791798690994e-122	0	PCDH17
CELF1	1.3627697400745e-126	0.325878	0.95	0.893	4.0094048522732e-122	0	CELF1
CREM	2.4073708673375e-126	0.644825	0.603	0.477	7.08272582879367e-122	0	CREM
SECISBP2L	3.30541197075711e-126	0.332293	0.878	0.822	9.72485255916448e-122	0	SECISBP2L
IGSF21	6.02719094459297e-126	0.418101	0.856	0.733	1.7732598478087e-121	0	IGSF21
GABRA3	6.58140397267151e-126	0.484677	0.74	0.656	1.93631486279968e-121	0	GABRA3
VXN	6.85380378245583e-126	0.569069	0.611	0.481	2.01645761083633e-121	0	VXN
DISP3	7.01607705090172e-126	1.22479	0.256	0.126	2.0642000291458e-121	0	DISP3
KIAA1468	1.0011291859531e-125	0.341891	0.9	0.829	2.94542217799261e-121	0	KIAA1468
PHYHIPL	1.22123815708823e-125	0.47803	0.777	0.687	3.59300478196928e-121	0	PHYHIPL
CAMK1D	2.78921376869666e-125	0.169882	0.99	0.931	8.20614582888244e-121	0	CAMK1D
AP001972.3	2.83225106204694e-125	0.791367	0.457	0.322	8.3327658496483e-121	0	AP001972.3
HOOK1	3.0063202403757e-125	0.499968	0.723	0.632	8.84489477920936e-121	0	HOOK1
FBXO21	8.67174747748083e-125	0.441163	0.763	0.686	2.55131482534964e-120	0	FBXO21
ZEB2	1.48840290134323e-124	0.220193	0.949	0.851	4.3790301760419e-120	0	ZEB2
NNAT	1.96648448333305e-124	1.05065	0.336	0.226	5.78559399841417e-120	0	NNAT
PTPRS	5.38868125698581e-124	0.381736	0.878	0.788	1.58540391261779e-119	0	PTPRS
KCND3	6.43308009057979e-124	0.231555	0.964	0.894	1.89267649344948e-119	0	KCND3
PPFIBP1	7.41563125450066e-124	0.156954	0.939	0.82	2.18175287138664e-119	0	PPFIBP1
NEBL	8.67482818014248e-124	0.184987	0.98	0.928	2.55222119887972e-119	0	NEBL
OVCH1	1.19399985674562e-123	0.820529	0.416	0.261	3.5128669785313e-119	0	OVCH1
PTPN4	2.38143361006824e-123	0.265996	0.963	0.9	7.00641582418177e-119	0	PTPN4
RPS24	6.73850578503803e-123	0.76132	0.494	0.371	1.98253578701604e-118	0	RPS24
SLC6A6	9.49580645256507e-123	0.711958	0.517	0.407	2.79376121640917e-118	0	SLC6A6
SLC8A1	1.59605323397012e-122	0.160042	0.997	0.958	4.6957482196635e-118	0	SLC8A1
CAMKK2	1.88381402679682e-122	0.408442	0.801	0.689	5.54236924823891e-118	0	CAMKK2
ABLIM2	3.65321117815691e-122	0.34559	0.916	0.858	1.07481126072554e-117	0	ABLIM2
POU2F2	4.60288393392474e-122	0.658355	0.601	0.47	1.3542144822e-117	0	POU2F2
SEC63	5.40286153966301e-122	0.442745	0.763	0.687	1.58957589358426e-117	0	SEC63
EXOG	1.52144966017372e-121	0.606064	0.568	0.465	4.4762570451971e-117	0	EXOG
ELMO1	5.04591105290767e-121	0.280068	0.924	0.842	1.48455749087597e-116	0	ELMO1
DANT2	6.87655250740411e-121	0.233233	0.981	0.928	2.02315051320336e-116	0	DANT2
ADCY1	1.16077479834e-120	0.297658	0.925	0.848	3.41511553419611e-116	0	ADCY1
OSBP2	1.50413605974783e-120	0.291949	0.95	0.882	4.4253187013841e-116	0	OSBP2
CNKSR2	2.31118932411716e-120	0.198367	0.993	0.945	6.79975011048509e-116	0	CNKSR2
ZDBF2	6.06645938583859e-120	0.428381	0.823	0.742	1.78481301590757e-115	0	ZDBF2
BLCAP	1.21132693578491e-119	0.571001	0.63	0.523	3.56384497777278e-115	0	BLCAP
SLC7A1	2.37278898314737e-119	0.625445	0.561	0.429	6.98098246731789e-115	0	SLC7A1
RMDN2-AS1	2.89657868791553e-119	1.24888	0.269	0.145	8.52202415771629e-115	0	RMDN2-AS1
BBS2	5.29006791873216e-119	0.489	0.702	0.607	1.55639088237019e-114	0	BBS2
C11orf87	9.15334099576628e-119	0.511705	0.67	0.527	2.6930044543644e-114	0	C11orf87
TMEM120B	9.3220568386167e-119	0.527804	0.691	0.576	2.74264234248942e-114	0	TMEM120B
NSF	1.46663790616664e-118	0.263679	0.959	0.909	4.31499538373287e-114	0	NSF
MTMR7	7.40408279804642e-118	0.369954	0.847	0.774	2.17835520001324e-113	0	MTMR7
SLITRK2	1.57037764572487e-117	0.9998	0.311	0.179	4.62020807148714e-113	0	SLITRK2
SLC2A13	2.63809473445417e-117	0.147628	0.985	0.921	7.76153851823762e-113	0	SLC2A13
NAF1	6.40504554947759e-117	0.525503	0.666	0.568	1.8844284511118e-112	0	NAF1
ETV5	6.64206857001571e-117	0.71963	0.504	0.352	1.95416299398432e-112	0	ETV5
SH3BGRL	1.77127880420913e-116	0.449519	0.771	0.691	5.21127936986369e-112	0	SH3BGRL
PIP5K1B	1.93405051790582e-116	0.485793	0.668	0.515	5.69017002873071e-112	0	PIP5K1B
NKTR	4.67346129119622e-116	0.290771	0.953	0.893	1.37497904648284e-111	0	NKTR
FRRS1L	5.29293751343783e-115	0.287189	0.924	0.873	1.55723514582854e-110	0	FRRS1L
C2orf80	1.16628932129907e-114	0.691166	0.498	0.368	3.43133981219399e-110	0	C2orf80
CYFIP1	1.26705761508201e-114	0.486192	0.735	0.632	3.72781020933278e-110	0	CYFIP1
ADAMTS8	5.32370611634651e-114	1.05536	0.29	0.162	1.56628757649031e-109	0	ADAMTS8
INTU	6.33996738463762e-114	0.446783	0.753	0.668	1.86528180423423e-109	0	INTU
FYN	8.8375774013139e-114	0.292161	0.914	0.849	2.60010364724056e-109	0	FYN
TUBGCP3	8.84223243528216e-114	0.421063	0.749	0.675	2.60147320478437e-109	0	TUBGCP3
NCAM1	1.24185399230207e-113	0.163967	0.995	0.952	3.65365863075192e-109	0	NCAM1
NCOR2	1.85384420929333e-113	0.413945	0.816	0.749	5.45419504816191e-109	0	NCOR2
EIF3E	2.44052113811951e-113	0.509778	0.65	0.551	7.18025724046142e-109	0	EIF3E
BSN	2.45457588647215e-113	0.365195	0.86	0.784	7.2216077155897e-109	0	BSN
KLHL25	2.84961601320312e-113	1.0263	0.318	0.199	8.3838552724449e-109	0	KLHL25
CPEB4	7.9569549976746e-113	0.266382	0.946	0.897	2.34101572986584e-108	0	CPEB4
RCAN1	2.3199245039939e-112	0.586113	0.587	0.464	6.82544988320045e-108	0	RCAN1
CKB	3.18160399436504e-112	0.312929	0.78	0.649	9.36059711182139e-108	0	CKB
SLC4A8	5.87659566491538e-112	0.357286	0.883	0.791	1.72895321057475e-107	0	SLC4A8
ZNRF3	8.37890160791679e-112	0.387287	0.823	0.729	2.4651566420652e-107	0	ZNRF3
ITGAV	8.40589613867277e-112	0.563759	0.57	0.426	2.47309870295891e-107	0	ITGAV
ANK3	9.24690791762692e-112	0.124874	0.999	0.962	2.72053277844502e-107	0	ANK3
REPS1	1.53379571989916e-111	0.315631	0.887	0.819	4.51258038751531e-107	0	REPS1
INTS6	3.36446967890347e-111	0.450182	0.766	0.683	9.89860624230191e-107	0	INTS6
INTS10	3.99626089573062e-111	0.389373	0.793	0.712	1.1757399181329e-106	0	INTS10
MCHR2	4.57443069072525e-111	0.515797	0.68	0.536	1.34584325351828e-106	0	MCHR2
COP1	7.21559772034247e-111	0.251125	0.956	0.906	2.12290100530196e-106	0	COP1
DNAJC10	1.51134384055478e-110	0.491354	0.702	0.605	4.44652471329623e-106	0	DNAJC10
ZNF318	1.72695064985508e-110	0.473459	0.711	0.609	5.08086150693864e-106	0	ZNF318
CYP46A1	2.08937322593138e-110	0.498272	0.705	0.611	6.14714496801272e-106	0	CYP46A1
SYBU	2.39733150551127e-110	0.268723	0.945	0.883	7.05318902236472e-106	0	SYBU
MOB1B	2.54902371648611e-110	0.478217	0.687	0.577	7.49948267627378e-106	0	MOB1B
ZFAND3	3.7861951650212e-110	0.212837	0.979	0.924	1.11393647950089e-105	0	ZFAND3
ATR	5.6768369120605e-110	0.368815	0.848	0.775	1.67018218789732e-105	0	ATR
RPTOR	6.46727593246313e-110	0.332068	0.899	0.828	1.90273725208998e-105	0	RPTOR
ELMOD1	9.91846738341218e-110	0.332789	0.85	0.792	2.9181122888737e-105	0	ELMOD1
STK4	1.74277131143817e-109	0.453648	0.73	0.648	5.12740747538225e-105	0	STK4
NBPF12	2.59486946121122e-109	0.552015	0.601	0.497	7.63436544182954e-105	0	NBPF12
LINC01793	3.47155574379625e-109	0.97368	0.348	0.22	1.0213664153823e-104	0	LINC01793
CFAP61	4.43441774597993e-109	0.717201	0.477	0.358	1.30465004504476e-104	0	CFAP61
CRIP2	5.35842561368285e-109	0.925352	0.334	0.207	1.57650239980163e-104	0	CRIP2
LRRFIP1	5.39625562563482e-109	0.264653	0.951	0.883	1.58763236761802e-104	0	LRRFIP1
LRRIQ1	1.22224730179867e-108	0.721842	0.499	0.368	3.59597378662188e-104	0	LRRIQ1
BEGAIN	1.24466364888655e-108	0.682893	0.504	0.376	3.66192492138913e-104	0	BEGAIN
H3F3B	1.60661209063374e-108	0.670272	0.43	0.293	4.72681343185352e-104	0	H3F3B
SFXN1	1.86678215670903e-108	0.400938	0.764	0.695	5.49225978325364e-104	0	SFXN1
SCN1A	3.27122837857844e-108	0.189726	0.969	0.901	9.62428101261563e-104	0	SCN1A
MYO6	5.60924014192691e-108	0.327399	0.895	0.833	1.65029454215632e-103	0	MYO6
GRHL1	7.36216584463905e-108	0.884892	0.37	0.255	2.16602281315125e-103	0	GRHL1
SV2B	4.50688972499681e-107	0.183821	0.981	0.926	1.32597202599131e-102	0	SV2B
KCNAB2	5.80383977266904e-107	0.345301	0.835	0.755	1.70754769951696e-102	0	KCNAB2
C12orf29	6.92327524157145e-107	0.770818	0.395	0.275	2.03689680882274e-102	0	C12orf29
LRRC6	1.95887591477154e-106	0.37905	0.784	0.728	5.76320882884935e-102	0	LRRC6
ADCY9	2.42169335801075e-106	0.323768	0.907	0.844	7.12486402860344e-102	0	ADCY9
HSP90B1	4.28661687732588e-106	0.563446	0.584	0.465	1.26116555147805e-101	0	HSP90B1
MYSM1	4.64756449236532e-106	0.335807	0.836	0.776	1.3673599492988e-101	0	MYSM1
PNISR	5.32407478974613e-106	0.205871	0.984	0.933	1.56639604389121e-101	0	PNISR
CFAP69	5.83069137026403e-106	0.47334	0.662	0.586	1.71544770804538e-101	0	CFAP69
RAPGEFL1	9.70544905374871e-106	0.468991	0.69	0.608	2.85544016610341e-101	0	RAPGEFL1
CDON	1.2992726145773e-105	0.419963	0.761	0.679	3.82258995934787e-101	0	CDON
MTRR	1.58432278953811e-105	0.625662	0.507	0.4	4.66123607910008e-101	0	MTRR
PHF20L1	1.87640597045245e-105	0.320061	0.882	0.819	5.52057400566815e-101	0	PHF20L1
MAP3K4	1.9870714494237e-105	0.396088	0.831	0.755	5.84616291134946e-101	0	MAP3K4
DACH2	2.86777045103506e-105	0.616492	0.54	0.403	8.43726744399024e-101	0	DACH2
SRGAP3	3.29190906545752e-105	0.151797	0.976	0.902	9.68512566148258e-101	0	SRGAP3
TNKS	1.20622241070038e-104	0.230822	0.965	0.915	3.54882695452158e-100	0	TNKS
PEAK1	1.32238370859673e-104	0.292946	0.933	0.866	3.89058510906243e-100	0	PEAK1
FOXN2	2.87074477691643e-104	0.707942	0.452	0.315	8.44601820816584e-100	0	FOXN2
CROT	3.14688971425715e-104	0.664288	0.49	0.353	9.25846422831597e-100	0	CROT
TSPYL2	3.42245114834946e-104	0.417528	0.739	0.635	1.0069193523559e-99	0	TSPYL2
AC060765.1	5.79210522967951e-104	1.06781	0.316	0.221	1.70409527962401e-99	0	AC060765.1
AKAP11	6.40944703373788e-104	0.297961	0.899	0.825	1.88572341179602e-99	0	AKAP11
CACNA1B	7.74512168651558e-104	0.151678	0.993	0.944	2.27869225138975e-99	0	CACNA1B
EFR3B	3.30526798557794e-103	0.428033	0.718	0.593	9.72442894036885e-99	0	EFR3B
CMC2	4.29330470872258e-103	0.414516	0.737	0.663	1.26313317835327e-98	0	CMC2
INKA2	1.34035334308647e-102	0.865656	0.364	0.25	3.9434535706947e-98	0	INKA2
PKP4	1.7719093944555e-102	0.204988	0.97	0.916	5.21313462942754e-98	0	PKP4
JPX	4.87941027993835e-102	0.298747	0.9	0.838	1.43557129846066e-97	0	JPX
RIN3	5.0051449271018e-102	1.0623	0.263	0.147	1.47256368900262e-97	0	RIN3
SOBP	1.06847559079658e-101	0.256711	0.956	0.895	3.14356203568262e-97	0	SOBP
EXOC4	1.26731787739301e-101	0.196724	0.978	0.927	3.72857592707797e-97	0	EXOC4
PPM1H	1.80491148985026e-101	0.270854	0.909	0.843	5.31023009428846e-97	0	PPM1H
ADAMTS3	1.85630667741232e-101	0.489894	0.628	0.472	5.46143987561478e-97	0	ADAMTS3
ENOX1	2.46161831037371e-101	0.202216	0.984	0.933	7.24232723095051e-97	0	ENOX1
WWC1	3.11258747770671e-101	0.477206	0.687	0.574	9.15754361816091e-97	0	WWC1
RPS25	4.99632419901047e-101	0.797522	0.344	0.223	1.46996854259087e-96	0	RPS25
HP1BP3	5.25348351647789e-101	0.366916	0.896	0.837	1.54562738538296e-96	0	HP1BP3
PLEKHG5	1.16622281357306e-100	0.632886	0.509	0.395	3.43114413981329e-96	0	PLEKHG5
AC139491.7	3.11696748433485e-100	0.484597	0.681	0.587	9.17043003566156e-96	0	AC139491.7
CRLF1	4.03876298791908e-100	0.670662	0.432	0.301	1.18824445867567e-95	0	CRLF1
MYO5C	9.25812757114001e-100	0.586679	0.591	0.472	2.7238337127051e-95	0	MYO5C
FZD3	1.66604214316543e-99	0.295511	0.904	0.84	4.90166258940702e-95	0	FZD3
LINC01572	1.70027877931276e-99	0.803486	0.362	0.227	5.00239019661608e-95	0	LINC01572
IBTK	2.2182393249275e-99	0.353221	0.848	0.784	6.52628191786919e-95	0	IBTK
UHRF1BP1L	5.3903290672411e-99	0.360569	0.82	0.762	1.585888714873e-94	0	UHRF1BP1L
ZNF189	6.53288864325856e-99	0.536344	0.572	0.474	1.9220411677331e-94	0	ZNF189
PTPN5	9.17696496634551e-99	0.415894	0.725	0.646	2.69995486274851e-94	0	PTPN5
RAP2B	2.08512276617676e-98	0.846407	0.332	0.21	6.13463969036865e-94	0	RAP2B
SHTN1	2.55592230900458e-98	0.316413	0.875	0.793	7.51977902532238e-94	0	SHTN1
AC069228.1	4.02983533473352e-98	0.602152	0.502	0.396	1.18561785383195e-93	0	AC069228.1
AL136531.2	1.05168518078263e-97	0.622949	0.549	0.439	3.09416297038056e-93	0	AL136531.2
CDH20	1.10826323491689e-97	0.140623	0.611	0.456	3.26062126344897e-93	0	CDH20
CXADR	4.10187497766655e-97	0.467636	0.674	0.585	1.20681263717928e-92	0	CXADR
BRAF	1.29292229584015e-96	0.217039	0.964	0.908	3.8039066865913e-92	0	BRAF
SPTB	1.35545549727213e-96	0.647643	0.501	0.373	3.98788561852433e-92	0	SPTB
ADGRB2	1.93611353843176e-96	0.512062	0.611	0.497	5.69623964142009e-92	0	ADGRB2
SERINC3	4.69020404983288e-96	0.396912	0.735	0.648	1.37990493350133e-91	0	SERINC3
CRTC1	8.02394626547014e-96	0.399236	0.801	0.729	2.36072523076397e-91	0	CRTC1
KLHL2	8.39991151555113e-96	0.294488	0.896	0.832	2.4713379669903e-91	0	KLHL2
EPB41L3	1.13622215243193e-95	0.214203	0.955	0.896	3.34287919466997e-91	0	EPB41L3
CPLX2	1.16642248788828e-95	0.463094	0.693	0.59	3.4317316016161e-91	0	CPLX2
GLCE	1.22785788590302e-95	0.484611	0.664	0.539	3.61248068611528e-91	0	GLCE
MAP2	1.62404581798137e-95	0.126525	0.997	0.96	4.77810520108299e-91	0	MAP2
SIAH3	2.18105929373969e-95	0.983612	0.28	0.163	6.41689454811154e-91	0	SIAH3
OPA1	3.88066147201314e-95	0.288788	0.887	0.832	1.14172941168099e-90	0	OPA1
PIAS1	5.42222137211829e-95	0.260372	0.922	0.867	1.59527174989092e-90	0	PIAS1
SEC14L1	7.97601214892483e-95	0.425001	0.715	0.627	2.34662253433517e-90	0	SEC14L1
AC124312.1	1.0240034086617e-94	0.172434	0.985	0.946	3.01272042862359e-90	0	AC124312.1
PCM1	1.05655844403561e-94	0.239512	0.947	0.9	3.10850059819717e-90	0	PCM1
SLC7A14	1.42486438244113e-94	0.441724	0.758	0.667	4.19209349958005e-90	0	SLC7A14
PRKACB	1.52065795148572e-94	0.220538	0.97	0.924	4.47392775906615e-90	0	PRKACB
TPM1	2.46128150732796e-94	0.458462	0.671	0.593	7.24133632270959e-90	0	TPM1
SYT16	3.26664098254343e-94	0.209182	0.967	0.917	9.61078443474103e-90	0	SYT16
GDAP1	3.74140995993596e-93	0.236201	0.959	0.91	1.10076022431276e-88	0	GDAP1
SEC14L5	4.92381808293193e-93	0.41762	0.757	0.676	1.4486365181794e-88	0	SEC14L5
SPIDR	6.14854050229305e-93	0.175841	0.985	0.931	1.80896210117964e-88	0	SPIDR
CAMK4	1.03959398862686e-92	0.281408	0.925	0.867	3.05858947393909e-88	0	CAMK4
PUM3	1.39834357680895e-92	0.308961	0.867	0.797	4.11406663732962e-88	0	PUM3
IRAK1BP1	2.16077724263143e-92	0.321439	0.869	0.808	6.35722272554592e-88	0	IRAK1BP1
MAPT	2.30938095930201e-92	0.197053	0.976	0.923	6.79442972036246e-88	0	MAPT
AGPAT4	2.98860989243073e-92	0.321618	0.902	0.832	8.79278916452045e-88	0	AGPAT4
CCDC59	6.19939323710141e-92	0.533029	0.603	0.509	1.82392348428761e-87	0	CCDC59
AC011474.2	6.38182054885845e-92	0.750252	0.399	0.289	1.87759542367965e-87	0	AC011474.2
BCL9	1.23343954535665e-91	0.798416	0.377	0.278	3.62890248639381e-87	0	BCL9
RGL1	1.25183279738066e-91	0.245414	0.929	0.872	3.68301727317364e-87	0	RGL1
LRFN5	1.49141693256715e-91	0.112497	0.993	0.945	4.38789775730582e-87	0	LRFN5
ANKMY2	2.5604558270547e-91	0.396364	0.733	0.647	7.53311708877763e-87	0	ANKMY2
ARHGAP32	2.57794564124266e-91	0.154468	0.989	0.942	7.58457387110002e-87	0	ARHGAP32
MAP2K5	2.98293309742135e-91	0.233928	0.943	0.889	8.77608746592337e-87	0	MAP2K5
LZTS3	3.2679835504207e-91	0.407846	0.717	0.638	9.61473440369275e-87	0	LZTS3
RCOR1	3.41754810563569e-91	0.460435	0.641	0.55	1.00547682815908e-86	0	RCOR1
TMEM59L	4.19057143521321e-91	0.349155	0.768	0.663	1.23290802195408e-86	0	TMEM59L
MAPK14	6.06646988164701e-91	0.279909	0.893	0.837	1.78481610387937e-86	0	MAPK14
CCDC102B	6.38183763085531e-91	0.431276	0.703	0.618	1.87760044937394e-86	0	CCDC102B
RPL38	1.74155618002481e-90	0.890395	0.267	0.157	5.12383243725099e-86	0	RPL38
BDP1	1.84992459347674e-90	0.262262	0.951	0.892	5.44266314646792e-86	0	BDP1
TARBP1	2.09556291538481e-90	0.282908	0.93	0.868	6.16535565335365e-86	0	TARBP1
MSH3	2.64571033317582e-90	0.322225	0.837	0.767	7.78394437123657e-86	0	MSH3
FAM124A	3.82295516900611e-90	0.652921	0.482	0.362	1.12475164027329e-85	0	FAM124A
MSRA	4.19075580471804e-90	0.115888	0.994	0.947	1.23296226530609e-85	0	MSRA
HSPH1	4.94772847695136e-90	0.308983	0.847	0.763	1.45567119520386e-85	0	HSPH1
C16orf87	5.09840463971229e-90	0.530255	0.566	0.475	1.50000162904975e-85	0	C16orf87
AC239809.3	6.38545395155108e-90	0.349759	0.815	0.761	1.87866440708584e-85	0	AC239809.3
ALS2CR12	7.38414994743878e-90	0.602822	0.522	0.415	2.17249075603596e-85	0	ALS2CR12
CAMSAP1	1.04830481869569e-89	0.41015	0.683	0.627	3.0842176070846e-85	0	CAMSAP1
BPTF	2.07825609354851e-89	0.228141	0.968	0.909	6.11443725282906e-85	0	BPTF
ELK4	2.4781269802446e-89	0.651579	0.456	0.359	7.29089738857763e-85	0	ELK4
ABCC8	4.15315907214198e-89	0.410343	0.696	0.634	1.22190093061489e-84	0	ABCC8
YWHAZ	2.14682720967308e-88	0.270517	0.913	0.841	6.31618033357917e-84	0	YWHAZ
CUL3	2.77805189141615e-88	0.316956	0.822	0.752	8.17330646973546e-84	0	CUL3
LRRC57	3.06614028372049e-88	0.727136	0.391	0.283	9.02089132873406e-84	0	LRRC57
KIAA0825	3.91067586351426e-88	0.259848	0.931	0.87	1.15055994580453e-83	0	KIAA0825
CALU	5.50610411275562e-88	0.56149	0.495	0.398	1.61995089101383e-83	0	CALU
RASA3	7.49289579454869e-88	0.49345	0.635	0.554	2.20448487171417e-83	0	RASA3
PHLPP1	1.9567849869179e-87	0.341159	0.818	0.745	5.75705711001114e-83	0	PHLPP1
TLE3	4.09276711301927e-87	0.792882	0.317	0.193	1.2041330123214e-82	0	TLE3
WDR17	4.51790861571308e-87	0.227373	0.945	0.888	1.32921389382895e-82	0	WDR17
AC006504.5	7.67422007800072e-87	0.35127	0.801	0.734	2.25783228914859e-82	0	AC006504.5
PTPDC1	1.13008868884166e-86	0.436395	0.647	0.571	3.32483393144105e-82	0	PTPDC1
MYO1D	1.25351468120844e-86	0.154485	0.92	0.819	3.68796554358335e-82	0	MYO1D
AC005261.1	1.29399535751684e-86	0.44859	0.591	0.494	3.8070637413503e-82	0	AC005261.1
KIAA0753	1.31916043551894e-86	0.409205	0.702	0.628	3.88110191734027e-82	0	KIAA0753
TBC1D32	1.54602145886848e-86	0.305038	0.877	0.816	4.54854973413696e-82	0	TBC1D32
ACSL3	2.18200114000336e-86	0.289828	0.864	0.791	6.41966555400389e-82	0	ACSL3
ZNF106	3.27790888918388e-86	0.313529	0.804	0.744	9.64393574286791e-82	0	ZNF106
DYNC2H1	3.60662743729436e-86	0.247706	0.931	0.875	1.06110585832637e-81	0	DYNC2H1
MAMDC2	8.08077536096821e-86	0.466845	0.533	0.403	2.37744491895046e-81	0	MAMDC2
GCFC2	1.477104673121e-85	0.391838	0.7	0.63	4.34578965878929e-81	0	GCFC2
TPT1	1.70059911904748e-85	0.580633	0.471	0.367	5.00333266814958e-81	0	TPT1
FAM126B	2.05794943155703e-85	0.269642	0.889	0.833	6.05469302258395e-81	0	FAM126B
METTL8	2.34107179210258e-85	0.576816	0.518	0.412	6.887667319545e-81	0	METTL8
AC021752.1	2.39560444292147e-85	0.773333	0.362	0.253	7.04810783151925e-81	0	AC021752.1
CNST	4.19969298168376e-85	0.342945	0.775	0.714	1.23559167214118e-80	0	CNST
ZNF280D	1.25078443560925e-84	0.367031	0.72	0.66	3.67993288800596e-80	0	ZNF280D
ATP8A1	1.99679098880858e-84	0.19014	0.979	0.933	5.87475876817372e-80	0	ATP8A1
THRA	2.80906927474741e-84	0.49566	0.561	0.468	8.26456271323435e-80	0	THRA
CCND2	3.66537527544198e-84	0.402262	0.715	0.623	1.07839005978778e-79	0	CCND2
KAT6B	3.71160342200479e-84	0.252188	0.937	0.88	1.09199084278803e-79	0	KAT6B
CSNK1A1	3.77224771910997e-84	0.241242	0.903	0.846	1.10983300143934e-79	0	CSNK1A1
PPP2R2A	3.52986166684262e-83	0.292637	0.845	0.788	1.03852060100177e-78	0	PPP2R2A
ABI2	3.63304401513488e-83	0.200429	0.955	0.902	1.06887787969283e-78	0	ABI2
RPL19	4.49237234011396e-83	0.739584	0.342	0.238	1.32170086618493e-78	0	RPL19
SH3YL1	8.87815948168119e-83	0.355191	0.8	0.739	2.61204330110542e-78	0	SH3YL1
HGSNAT	1.22861625358567e-82	0.379859	0.737	0.664	3.6147118796744e-78	0	HGSNAT
TRAF3	1.45127364473015e-82	0.331821	0.837	0.782	4.26979219016057e-78	0	TRAF3
HTT	1.62792341934491e-82	0.269594	0.891	0.841	4.78951349205466e-78	0	HTT
ADARB1	2.59702733065005e-82	0.343639	0.765	0.705	7.6407141095055e-78	0	ADARB1
SLC4A7	2.72811077352166e-82	0.456919	0.666	0.573	8.02637470677808e-78	0	SLC4A7
MTMR12	2.95160297476366e-82	0.336517	0.809	0.732	8.68391111205218e-78	0	MTMR12
FAM118B	3.59195647389793e-82	0.622463	0.447	0.353	1.05678951418551e-77	0	FAM118B
MYO9A	6.20084088315137e-82	0.185604	0.97	0.912	1.82434939623196e-77	0	MYO9A
GARNL3	8.20760622410761e-82	0.117051	0.905	0.802	2.4147598271947e-77	0	GARNL3
TBC1D1	8.75692461318176e-82	0.266371	0.882	0.796	2.57637479044421e-77	0	TBC1D1
ADAM22	1.32902456656941e-81	0.189342	0.966	0.918	3.91012317730385e-77	0	ADAM22
JAM2	1.95031408018507e-81	0.781759	0.319	0.209	5.73801905531251e-77	0	JAM2
LINC02055	4.06646085388395e-81	0.549942	0.401	0.419	1.1963934478212e-76	0	LINC02055
SYNPO	5.97131740443116e-81	0.478206	0.557	0.459	1.75682129355769e-76	0	SYNPO
AC106791.1	6.22372977376131e-81	0.528862	0.548	0.427	1.83108353673832e-76	0	AC106791.1
CELF5	7.43434482819366e-81	0.322244	0.92	0.862	2.18725859190286e-76	0	CELF5
LINC01551	8.1554818236513e-81	0.442313	0.636	0.554	2.39942430733645e-76	0	LINC01551
TRIM9	9.54960897780371e-81	0.130359	0.991	0.947	2.80959045735963e-76	0	TRIM9
MAPK1	1.73207530881818e-80	0.271158	0.917	0.853	5.09593876607397e-76	0	MAPK1
SLC17A6	2.02566529065657e-80	0.955861	0.262	0.158	5.95970985164069e-76	0	SLC17A6
FHL1	6.86699913995075e-80	0.391978	0.686	0.613	2.02033981696491e-75	0	FHL1
CDK5R1	1.69024527448104e-79	0.416308	0.638	0.532	4.97287062205068e-75	0	CDK5R1
MPP7	1.71623720371184e-79	0.326411	0.772	0.676	5.0493414770406e-75	0	MPP7
CHSY1	3.18800129079739e-79	0.441032	0.617	0.537	9.37941859765499e-75	0	CHSY1
FAM169A	3.31569190738781e-79	0.283341	0.864	0.801	9.75509716072569e-75	0	FAM169A
RBFOX3	3.46004885655775e-79	0.107572	0.985	0.925	1.01798097408785e-74	0	RBFOX3
RPL31	6.9854632459342e-79	0.560335	0.498	0.4	2.0551931415863e-74	0	RPL31
CDC37L1	7.99955108580373e-79	0.564273	0.462	0.365	2.35354792495432e-74	0	CDC37L1
VWA3A	8.73883853562506e-79	0.463514	0.651	0.553	2.57105368556625e-74	0	VWA3A
PHF21A	1.28192796110272e-78	0.261616	0.916	0.863	3.77156025436032e-74	0	PHF21A
MAP2K4	1.42314045847153e-78	0.212602	0.953	0.901	4.18702154286909e-74	0	MAP2K4
KCNV1	1.45661225674427e-78	0.549086	0.472	0.357	4.28549892056731e-74	0	KCNV1
HNRNPU	1.50924043380519e-78	0.247724	0.902	0.851	4.44033628029824e-74	0	HNRNPU
RANBP2	1.58392869353877e-78	0.289321	0.865	0.8	4.66007660926043e-74	0	RANBP2
SHISA9	1.78143605998243e-78	0.120817	0.967	0.894	5.2411630320743e-74	0	SHISA9
CKMT2	3.45986892216024e-78	0.908709	0.263	0.161	1.01792803558876e-73	0	CKMT2
PRRC2C	3.97216415574516e-78	0.244805	0.941	0.889	1.16865041626178e-73	0	PRRC2C
AC015923.1	4.57356437830019e-78	0.580799	0.43	0.343	1.3455883757397e-73	0	AC015923.1
ACAP3	5.06533193043846e-78	0.39262	0.725	0.65	1.4902713072543e-73	0	ACAP3
TMX3	5.13463975948216e-78	0.337325	0.74	0.671	1.51066236363725e-73	0	TMX3
TMEM30A	8.59089446995892e-78	0.341615	0.686	0.596	2.52752706200661e-73	0	TMEM30A
CCSAP	1.10778575113407e-77	0.377581	0.704	0.628	3.25921645841153e-73	0	CCSAP
GRB10	1.32238819509733e-77	0.296981	0.828	0.76	3.89059830879586e-73	0	GRB10
FEZ2	1.81078524537592e-77	0.286715	0.828	0.767	5.3275112704205e-73	0	FEZ2
PSRC1	2.03934815714154e-77	0.716867	0.337	0.23	5.99996621312612e-73	0	PSRC1
TTLL5	2.62971920839142e-77	0.316524	0.832	0.79	7.7368968830084e-73	0	TTLL5
PHF14	5.81879194529088e-77	0.180911	0.957	0.906	1.71194677822403e-72	0	PHF14
ARID4A	6.68273507005146e-77	0.319911	0.816	0.754	1.96612748495984e-72	0	ARID4A
SSR1	9.49804166272357e-77	0.389826	0.656	0.575	2.7944188375899e-72	0	SSR1
ZNF638	1.61557871500826e-76	0.120972	0.989	0.943	4.7531941374258e-72	0	ZNF638
ZNF706	1.8725081110529e-76	0.30213	0.822	0.76	5.50910611352875e-72	0	ZNF706
FOSL2	2.21094821967157e-76	0.785698	0.274	0.168	6.50483075709571e-72	0	FOSL2
ERCC1	3.9882888422568e-76	0.59309	0.476	0.387	1.17339446028037e-71	0	ERCC1
JPH1	4.92471569480016e-76	0.31692	0.823	0.76	1.44890060456715e-71	0	JPH1
PRNP	7.90461504034642e-76	0.158553	0.89	0.802	2.32561679102032e-71	0	PRNP
AL159163.1	8.44776790702046e-76	0.814116	0.313	0.217	2.48541779592449e-71	0	AL159163.1
PLPPR5	1.38593839488267e-75	0.359212	0.742	0.666	4.07756935158429e-71	0	PLPPR5
RPL4	2.64293283608205e-75	0.603777	0.413	0.317	7.775772697037e-71	0	RPL4
VWDE	6.36878006238715e-75	0.821782	0.304	0.199	1.87375878215492e-70	0	VWDE
FTO	2.08218652025682e-74	0.185627	0.97	0.919	6.12600096124759e-70	0	FTO
CDO1	2.60899434734532e-74	0.741131	0.325	0.229	7.67592226932466e-70	0	CDO1
SHANK2	2.97093469184557e-74	0.190073	0.963	0.905	8.74078695687886e-70	0	SHANK2
CDC42BPA	3.53891017138035e-74	0.115232	0.99	0.945	1.04118276152181e-69	0	CDC42BPA
SRRM3	4.49289176085985e-74	0.193387	0.964	0.908	1.32185368496258e-69	0	SRRM3
DNAH7	5.90980797573816e-74	0.326886	0.779	0.692	1.73872460454192e-69	0	DNAH7
MTHFD2L	9.03763628602976e-74	0.383715	0.648	0.551	2.65896297171282e-69	0	MTHFD2L
ARL6	9.53098388449161e-74	0.390462	0.671	0.581	2.80411076865628e-69	0	ARL6
CHRD	1.11216126764298e-73	0.64504	0.393	0.287	3.27208966553241e-69	0	CHRD
USP31	2.29431679382345e-73	0.307334	0.797	0.744	6.75010943910797e-69	0	USP31
RGS7BP	2.70220261533595e-73	0.302397	0.859	0.788	7.95015031457989e-69	0	RGS7BP
ZFAT	3.61071075431409e-73	0.502128	0.569	0.496	1.06230721102675e-68	0	ZFAT
OTUD7A	4.54543971138801e-73	0.110124	0.986	0.934	1.33731381748747e-68	0	OTUD7A
ANKRD33B	5.81521179110745e-73	0.323699	0.823	0.74	1.71089346106172e-68	0	ANKRD33B
TRIM36	9.57656309381816e-73	0.435497	0.537	0.413	2.81752062783224e-68	0	TRIM36
SGK1	1.04759133661847e-72	0.221961	0.686	0.554	3.0821184714652e-68	0	SGK1
CMSS1	1.14028770779179e-72	0.233683	0.92	0.861	3.35484046509422e-68	0	CMSS1
PEG10	1.27195127830742e-72	0.653856	0.393	0.287	3.74220785590826e-68	0	PEG10
ABCB1	1.54429864997536e-72	0.748232	0.318	0.229	4.5434810580925e-68	0	ABCB1
CRLS1	2.01458662393417e-72	0.41931	0.608	0.536	5.92711530627673e-68	0	CRLS1
MOK	2.47281891487254e-72	0.325104	0.774	0.716	7.27528052944649e-68	0	MOK
PNCK	2.97229086563794e-72	0.582556	0.42	0.311	8.74477695579339e-68	0	PNCK
ZMYM2	3.13810514217543e-72	0.192694	0.95	0.892	9.23261913879434e-68	0	ZMYM2
JAK2	3.65591985226232e-72	0.278776	0.87	0.809	1.0756081797341e-67	0	JAK2
WRNIP1	6.7511402293504e-72	0.487074	0.516	0.446	1.98625296687718e-67	0	WRNIP1
SFPQ	8.62699215897433e-72	0.271505	0.884	0.829	2.53814736309184e-67	0	SFPQ
PAK3	7.63166706635405e-71	0.14697	0.978	0.926	2.24531276759203e-66	0	PAK3
TCERG1	7.97020993593973e-71	0.266701	0.876	0.822	2.34491546525283e-66	0	TCERG1
GMDS	1.41078098451709e-70	0.228421	0.92	0.857	4.15065873454772e-66	0	GMDS
AL591885.1	1.60635835021228e-70	0.640582	0.391	0.29	4.72606690215955e-66	0	AL591885.1
RPAP2	2.47202175735923e-70	0.232421	0.906	0.856	7.27293521232659e-66	0	RPAP2
FAM81A	2.58870036398463e-70	0.290998	0.839	0.76	7.61621534087919e-66	0	FAM81A
WNK1	3.89448446330358e-70	0.202366	0.953	0.905	1.14579627394855e-65	0	WNK1
FAAH	6.49880284587959e-70	0.68021	0.371	0.278	1.91201278528623e-65	0	FAAH
CALCRL	7.13827057702129e-70	0.576653	0.255	0.149	2.10015058646543e-65	0	CALCRL
KCNH4	9.29325070907005e-70	0.870912	0.259	0.169	2.7341672911155e-65	0	KCNH4
TENT2	1.05716859163637e-69	0.242891	0.866	0.819	3.11029571345338e-65	0	TENT2
SLC25A29	1.57572805628126e-69	0.467442	0.503	0.401	4.63594951438508e-65	0	SLC25A29
TUBA8	1.67483193494182e-69	0.883357	0.257	0.178	4.92752303579232e-65	0	TUBA8
DSTN	3.67619652809423e-69	0.361261	0.694	0.617	1.0815737805306e-64	0	DSTN
SHPRH	4.55758154940917e-69	0.223135	0.919	0.862	1.34088606765167e-64	0	SHPRH
KIAA2026	6.38036912556274e-69	0.276765	0.876	0.821	1.87716840043181e-64	0	KIAA2026
C3orf58	6.77057079454817e-69	0.378274	0.698	0.596	1.99196963346402e-64	0	C3orf58
NBEAL1	1.133129141852e-68	0.31468	0.814	0.748	3.33377924824276e-64	0	NBEAL1
RNF2	1.33041931009284e-68	0.546617	0.457	0.383	3.91422665222414e-64	0	RNF2
C15orf41	2.00184795856834e-68	0.414792	0.658	0.562	5.8896368789039e-64	0	C15orf41
SPCS3	4.52301509850397e-68	0.420387	0.561	0.475	1.33071627213085e-63	0	SPCS3
TMEM232	7.51063473067991e-68	0.247247	0.952	0.916	2.20970384411334e-63	0	TMEM232
NDEL1	8.07491323794339e-68	0.459333	0.51	0.436	2.37572022373533e-63	0	NDEL1
ONECUT2	8.22358974815505e-68	0.720636	0.306	0.197	2.4194623398047e-63	0	ONECUT2
MPHOSPH8	9.44452218338352e-68	0.196176	0.945	0.889	2.77867287157326e-63	0	MPHOSPH8
CCDC30	9.62998398126031e-68	0.265194	0.874	0.826	2.8332375871266e-63	0	CCDC30
RBM39	1.37220787237611e-67	0.233385	0.906	0.852	4.03717278131776e-63	0	RBM39
RFLNA	1.84166915571031e-67	0.464976	0.586	0.509	5.41837482301529e-63	0	RFLNA
PPIL6	2.05099676224443e-67	0.553864	0.462	0.372	6.03423757419935e-63	0	PPIL6
CPNE8	2.24284475281203e-67	0.17728	0.797	0.683	6.59867354724827e-63	0	CPNE8
MIR137HG	3.07670614407795e-67	0.170649	0.96	0.904	9.05197714649174e-63	0	MIR137HG
KIAA1549L	3.19893290986146e-67	0.14413	0.979	0.926	9.41158051410339e-63	0	KIAA1549L
JAKMIP1	3.7234810720324e-67	0.257905	0.87	0.808	1.09548536620265e-62	0	JAKMIP1
CHD5	4.87810177337635e-67	0.26498	0.944	0.889	1.43518632274506e-62	0	CHD5
ARL13B	6.10294874352711e-67	0.378378	0.654	0.586	1.79554854983311e-62	0	ARL13B
LRIF1	6.80839926622531e-67	0.603866	0.383	0.293	2.00309914811615e-62	0	LRIF1
FBXO33	1.24610717122787e-66	0.310077	0.767	0.717	3.66617190846953e-62	0	FBXO33
FAM66D	1.50908712750968e-66	0.240658	0.885	0.843	4.43988523784622e-62	0	FAM66D
CYTOR	1.86598659322287e-66	0.594185	0.414	0.335	5.489919155921e-62	0	CYTOR
IFT122	1.86640571846879e-66	0.391645	0.637	0.561	5.49115226430702e-62	0	IFT122
AL049875.1	2.03964634199098e-66	0.571586	0.419	0.336	6.00084350277166e-62	0	AL049875.1
DUSP19	2.09926862030763e-66	0.7093	0.313	0.233	6.17625820780706e-62	0	DUSP19
COG6	2.70544316473573e-66	0.248876	0.863	0.814	7.95968433496899e-62	0	COG6
CLK4	2.93592317212552e-66	0.372999	0.62	0.551	8.63777956471048e-62	0	CLK4
BAZ2B	9.54670907588844e-66	0.233078	0.931	0.882	2.80873727721714e-61	0	BAZ2B
TAPT1	1.36654643782404e-65	0.354408	0.669	0.601	4.0205162747221e-61	0	TAPT1
PCGF5	1.48037377886686e-65	0.255477	0.854	0.799	4.3554076948042e-61	0	PCGF5
NHLRC2	1.59812836635767e-65	0.328491	0.702	0.641	4.70185346666089e-61	0	NHLRC2
NRXN2	1.69863899257872e-65	0.330002	0.771	0.702	4.99756578006585e-61	0	NRXN2
TMEM161B-AS1	1.81541753492103e-65	0.158077	0.975	0.934	5.34113992949117e-61	0	TMEM161B-AS1
SS18	2.14826103291397e-65	0.378786	0.647	0.584	6.32039878493618e-61	0	SS18
TNR	2.84401385383727e-65	0.126817	0.966	0.903	8.36737315937465e-61	0	TNR
NPTX1	3.13923670072656e-65	0.399651	0.646	0.568	9.23594829720762e-61	0	NPTX1
NNT	3.40504279804264e-65	0.254556	0.856	0.81	1.00179764161213e-60	0	NNT
PABPN1	4.04698189566894e-65	0.45885	0.607	0.519	1.19066254352476e-60	0	PABPN1
RBBP7	4.30119504277863e-65	0.4984	0.474	0.388	1.2654545935359e-60	0	RBBP7
IGSF3	6.88881813787635e-65	0.574933	0.404	0.291	2.0267591843446e-60	0	IGSF3
GATB	7.83398521819421e-65	0.411988	0.573	0.511	2.30483679104492e-60	0	GATB
CHKA	1.33827095327027e-64	0.300796	0.717	0.654	3.93732697161647e-60	0	CHKA
PIP4K2C	1.43236943194773e-64	0.499365	0.479	0.39	4.21417410573342e-60	0	PIP4K2C
PPIP5K2	1.55719896494345e-64	0.260633	0.852	0.8	4.58143507476013e-60	0	PPIP5K2
SLC25A21	2.06584496652267e-64	0.687919	0.343	0.239	6.07792247600634e-60	0	SLC25A21
RBM25	2.96457731202439e-64	0.19981	0.933	0.877	8.72208290970696e-60	0	RBM25
PPFIA2-AS1	5.6951213546527e-64	0.784279	0.259	0.171	1.67556165375237e-59	0	PPFIA2-AS1
PKM	5.75725044541216e-64	0.290758	0.767	0.702	1.69384065354471e-59	0	PKM
AC026704.1	5.80567145788328e-64	0.716492	0.295	0.199	1.70808659962384e-59	0	AC026704.1
RPS27A	5.81383919330112e-64	0.657951	0.28	0.187	1.71048962906112e-59	0	RPS27A
LRIG1	8.38483133808028e-64	0.435032	0.375	0.261	2.4669012279766e-59	0	LRIG1
TOMM20	8.474997048195e-64	0.281241	0.694	0.603	2.49342888154945e-59	0	TOMM20
UNC5A	9.96004049714093e-64	0.309839	0.727	0.673	2.93034351466383e-59	0	UNC5A
HS6ST1	2.0260277736446e-63	0.407374	0.607	0.527	5.96077631283978e-59	0	HS6ST1
RSPH1	2.04599295093397e-63	0.744804	0.287	0.201	6.01951586094283e-59	0	RSPH1
AP1S1	2.22267919028635e-63	0.596982	0.315	0.216	6.53934444574148e-59	0	AP1S1
MMP17	2.67609417267051e-63	0.427472	0.661	0.603	7.8733366654139e-59	0	MMP17
RSRP1	5.69017526932715e-63	0.224618	0.872	0.828	1.67410646598874e-58	0	RSRP1
RPS8	5.84963209095318e-63	0.523756	0.396	0.301	1.72102025747933e-58	0	RPS8
STX6	7.58945616522998e-63	0.396659	0.579	0.521	2.23289389837231e-58	0	STX6
IPO11	9.98073969591746e-63	0.337617	0.663	0.612	2.93643342593588e-58	0	IPO11
CMTM4	1.00461048131733e-62	0.303141	0.79	0.723	2.95566449708372e-58	0	CMTM4
MLLT6	1.01635769345298e-62	0.433099	0.548	0.475	2.99022596990802e-58	0	MLLT6
UQCRB	1.76637999137435e-62	0.503805	0.421	0.329	5.19686657262247e-58	0	UQCRB
DCAF6	2.47745264355823e-62	0.186605	0.933	0.876	7.28891342261267e-58	0	DCAF6
ZNF540	2.8050183549975e-62	0.359987	0.615	0.549	8.25264450223813e-58	0	ZNF540
ARGLU1	3.31766958173187e-62	0.172214	0.941	0.889	9.76091567641334e-58	0	ARGLU1
U2SURP	3.73772391727914e-62	0.288064	0.807	0.751	1.0996757537027e-57	0	U2SURP
YWHAQ	4.93884359471123e-62	0.322358	0.667	0.596	1.45305717399999e-57	0	YWHAQ
MMD2	5.84801965746592e-62	0.526613	0.291	0.185	1.72054586342305e-57	0	MMD2
IRS2	1.3554115544371e-61	0.292909	0.729	0.659	3.98775633430939e-57	0	IRS2
SLC39A10	2.28822613109006e-61	0.227023	0.91	0.854	6.73219010028006e-57	0	SLC39A10
KNDC1	2.36848425910356e-61	0.287724	0.804	0.745	6.96831753870859e-57	0	KNDC1
PLCB4	2.88472558843641e-61	0.14785	0.742	0.624	8.48715115373875e-57	0	PLCB4
ARMC2	3.31234269012371e-61	0.280032	0.801	0.748	9.74524342861298e-57	0	ARMC2
GRIN1	3.55920936242352e-61	0.175876	0.969	0.917	1.04715498651862e-56	0	GRIN1
AEBP2	4.36192874820395e-61	0.117032	0.972	0.916	1.28332305700909e-56	0	AEBP2
AGFG1	7.07591863841216e-61	0.216858	0.876	0.819	2.08180602260724e-56	0	AGFG1
IPO8	7.25346210558596e-61	0.366964	0.607	0.555	2.13404108608444e-56	0	IPO8
ZC3H8	1.78929396071396e-60	0.321281	0.707	0.632	5.26428176181654e-56	0	ZC3H8
HNRNPA2B1	1.89500274711988e-60	0.220925	0.858	0.808	5.5752875823014e-56	0	HNRNPA2B1
NPHP1	1.93715438876869e-60	0.40475	0.597	0.518	5.69930192719637e-56	0	NPHP1
HPRT1	1.99331788351139e-60	0.246912	0.839	0.791	5.86454054507886e-56	0	HPRT1
ARAP2	2.02652059652955e-60	0.156995	0.933	0.875	5.96222624704958e-56	0	ARAP2
ENSA	3.32231939822644e-60	0.25186	0.869	0.826	9.77459590152201e-56	0	ENSA
B9D1	3.35276554548405e-60	0.537135	0.435	0.347	9.86417151136863e-56	0	B9D1
GRK5	3.53343404884059e-60	0.531581	0.446	0.364	1.03957163150939e-55	0	GRK5
NAGPA	6.92282829687294e-60	0.386296	0.575	0.503	2.03676531322299e-55	0	NAGPA
C16orf72	1.11223391008057e-59	0.411333	0.581	0.515	3.27230338684806e-55	0	C16orf72
COL5A3	1.25101520226223e-59	0.445978	0.279	0.178	3.68061182657572e-55	0	COL5A3
UBN2	1.3665111840624e-59	0.228748	0.889	0.836	4.02041255462997e-55	0	UBN2
TXNL4A	1.44903955784057e-59	0.350896	0.654	0.598	4.26321928312275e-55	0	TXNL4A
MGAT4C	1.4713805961502e-59	0.108743	0.859	0.775	4.3289488519335e-55	0	MGAT4C
C4orf45	3.4816730194096e-59	0.678713	0.324	0.248	1.0243430190405e-54	0	C4orf45
UBL3	3.51036722089003e-59	0.280936	0.747	0.698	1.03278514005806e-54	0	UBL3
KCNJ3	3.66412886941176e-59	0.138104	0.976	0.932	1.07802335466963e-54	0	KCNJ3
FAM120A	4.84310476711708e-59	0.258737	0.847	0.791	1.42488985353352e-54	0	FAM120A
LINC00320	8.95046178124209e-59	0.676586	0.303	0.211	2.63331536065924e-54	0	LINC00320
DIRC3	1.05711288170772e-58	0.303216	0.807	0.731	3.11013180927228e-54	0	DIRC3
XRCC5	1.20593187758045e-58	0.224128	0.835	0.784	3.54797217702946e-54	0	XRCC5
ARHGEF7	1.68328944294951e-58	0.120949	0.972	0.918	4.95240587010174e-54	0	ARHGEF7
AKAP8L	2.17089447842429e-58	0.262257	0.849	0.788	6.3869886449721e-54	0	AKAP8L
ZNF236	3.15836825297211e-58	0.324075	0.71	0.649	9.29223523706926e-54	0	ZNF236
EPB41L4B	3.23338341259531e-58	0.276558	0.865	0.811	9.51293733819666e-54	0	EPB41L4B
MKL1	3.47300782331483e-58	0.196971	0.931	0.876	1.02179363169746e-53	0	MKL1
SBNO1	4.67726690845365e-58	0.29049	0.728	0.671	1.37609869713615e-53	0	SBNO1
PEBP1	5.68964564447797e-58	0.291066	0.755	0.685	1.67395064506186e-53	0	PEBP1
SPAG1	5.73040860777635e-58	0.434838	0.5	0.43	1.68594351649388e-53	0	SPAG1
ATPAF1	6.14878907895949e-58	0.302399	0.683	0.628	1.80903523492067e-53	0	ATPAF1
RPL13A	6.29792955876397e-58	0.640853	0.29	0.211	1.85291385548395e-53	0	RPL13A
ISPD	7.514689473002e-58	0.243289	0.854	0.803	2.21089678985192e-53	0	ISPD
MICU3	8.55273398338543e-58	0.180707	0.915	0.864	2.51629986525183e-53	0	MICU3
AJAP1	8.76263319277116e-58	0.266133	0.824	0.75	2.5780543116452e-53	0	AJAP1
APLP1	1.06765065854356e-57	0.282037	0.63	0.541	3.141135002501e-53	0	APLP1
SNX25	1.18469557972534e-57	0.356377	0.667	0.577	3.48549286510992e-53	0	SNX25
ARID4B	1.34952410631496e-57	0.179166	0.946	0.895	3.97043487318924e-53	0	ARID4B
DDN	1.40121139052884e-57	0.710445	0.255	0.167	4.1225040320749e-53	0	DDN
LUC7L3	1.490944007037e-57	0.164432	0.95	0.9	4.38650636310355e-53	0	LUC7L3
CFAP36	1.87816840403283e-57	0.31481	0.662	0.609	5.525759261505e-53	0	CFAP36
PDHX	2.28802553037204e-57	0.237567	0.791	0.745	6.73159991290759e-53	0	PDHX
RPLP2	2.29185118495293e-57	0.637127	0.295	0.22	6.74285537125003e-53	0	RPLP2
CLEC16A	4.08265220391922e-57	0.240356	0.885	0.829	1.20115710491507e-52	0	CLEC16A
KCNC1	4.99198227153495e-57	0.294976	0.717	0.652	1.4686911041083e-52	0	KCNC1
ATP1B3	6.13040360177776e-57	0.276764	0.778	0.713	1.80362604367903e-52	0	ATP1B3
TESC	6.64442860559508e-57	0.453883	0.519	0.426	1.95485734005213e-52	0	TESC
EMC2	7.46286889258335e-57	0.416346	0.505	0.44	2.19565065688695e-52	0	EMC2
DNAAF4	7.83059681752945e-57	0.450963	0.56	0.489	2.30383988968534e-52	0	DNAAF4
TSPAN7	9.12847361008906e-57	0.116155	0.71	0.6	2.6856882208243e-52	0	TSPAN7
KPNA1	9.83631266015504e-57	0.250599	0.801	0.742	2.89394154774421e-52	0	KPNA1
MT-ND2	1.51078012923602e-56	0.263535	0.933	0.874	4.44486621822531e-52	0	MT-ND2
FNIP2	1.55517840481074e-56	0.227454	0.893	0.844	4.57549038479369e-52	0	FNIP2
JARID2	1.85092777331045e-56	0.236244	0.858	0.815	5.44561460185668e-52	0	JARID2
KCNJ6	2.5726141720051e-56	0.257118	0.92	0.863	7.56888815545621e-52	0	KCNJ6
USP7	2.93021312952645e-56	0.342455	0.639	0.582	8.62098004837976e-52	0	USP7
USP2	3.06364345610257e-56	0.592558	0.355	0.272	9.01354541219939e-52	0	USP2
ANKRD18B	4.56894437155304e-56	0.47587	0.505	0.406	1.34422912355462e-51	0	ANKRD18B
CRYBG3	5.38056516491154e-56	0.494742	0.411	0.304	1.58301607716863e-51	0	CRYBG3
AP4S1	5.70315245478885e-56	0.377125	0.615	0.558	1.67792448372343e-51	0	AP4S1
CTPS1	5.73393745349942e-56	0.662415	0.31	0.223	1.68698173819406e-51	0	CTPS1
RTN4RL2	5.77553548647482e-56	0.646181	0.328	0.244	1.69922029547576e-51	0	RTN4RL2
ANKRD10	6.18617732566187e-56	0.219566	0.853	0.794	1.82003523098298e-51	0	ANKRD10
KCNT1	8.41244750179327e-56	0.285907	0.763	0.713	2.4750261795026e-51	0	KCNT1
RAB12	9.21259954482453e-56	0.32715	0.664	0.604	2.71043891208282e-51	0	RAB12
PCNX1	9.43716360009997e-56	0.177173	0.938	0.884	2.77650790278541e-51	0	PCNX1
CA5B	1.01211909397086e-55	0.362625	0.607	0.549	2.97775558637166e-51	0	CA5B
CPLANE1	1.21459880377853e-55	0.183951	0.937	0.882	3.5734711405968e-51	0	CPLANE1
MRPS22	1.2723512062691e-55	0.671736	0.275	0.215	3.74338448396432e-51	0	MRPS22
MT-ND1	1.74734810946679e-55	0.174901	0.962	0.916	5.14087287286223e-51	0	MT-ND1
ADGRA2	1.89449560197671e-55	0.664952	0.315	0.233	5.57379551057567e-51	0	ADGRA2
GPC6	2.45914603289253e-55	0.235705	0.733	0.637	7.23505354337311e-51	0	GPC6
PLK2	2.77954820386737e-55	0.445011	0.495	0.401	8.1777087705982e-51	0	PLK2
LCLAT1	3.98640384973542e-55	0.291375	0.704	0.659	1.17283987663066e-50	0	LCLAT1
RBM26	4.05847502155836e-55	0.154347	0.953	0.907	1.19404393609268e-50	0	RBM26
SLC22A10	5.75480800549422e-55	0.16944	0.704	0.593	1.69312206329645e-50	0	SLC22A10
PTDSS1	6.71672390281629e-55	0.352634	0.566	0.515	1.97612733944758e-50	0	PTDSS1
PRPF38B	7.77190771599835e-55	0.436768	0.55	0.475	2.28657296912388e-50	0	PRPF38B
MRPL33	8.88964994768155e-55	0.384597	0.577	0.505	2.61542391110739e-50	0	MRPL33
ZMIZ2	9.27467556101174e-55	0.449774	0.462	0.384	2.72870229680526e-50	0	ZMIZ2
VSTM2L	1.06923759633793e-54	0.417903	0.44	0.336	3.14580393218582e-50	0	VSTM2L
NAA35	1.10220631795226e-54	0.271741	0.721	0.67	3.24280120804735e-50	0	NAA35
MYO9B	1.29032151755365e-54	0.336146	0.696	0.634	3.79625493679459e-50	0	MYO9B
ELK1	1.90862752460176e-54	0.468609	0.397	0.294	5.61537304013084e-50	0	ELK1
PARP11	2.04630574833627e-54	0.313692	0.645	0.608	6.02043614218013e-50	0	PARP11
BORCS5	4.65849844541721e-54	0.325433	0.642	0.585	1.3705768276262e-49	0	BORCS5
ZDHHC14	5.4997795254281e-54	0.251794	0.935	0.875	1.6180901341762e-49	0	ZDHHC14
TP53BP1	5.66831499972377e-54	0.271036	0.782	0.727	1.66767495606873e-49	0	TP53BP1
SYDE2	7.42294276442272e-54	0.684769	0.312	0.231	2.18390399072081e-49	0	SYDE2
LINC00476	7.91681095850175e-54	0.306189	0.733	0.667	2.3292049521008e-49	0	LINC00476
BCL2L13	9.96062753838152e-54	0.311112	0.7	0.648	2.93051622806723e-49	0	BCL2L13
TBC1D14	1.16797334219278e-53	0.365067	0.605	0.536	3.43629437006537e-49	0	TBC1D14
PPP1R7	1.30198541113125e-53	0.397316	0.545	0.478	3.83057127808925e-49	0	PPP1R7
SETX	1.56213784531694e-53	0.256602	0.836	0.783	4.59596575470695e-49	0	SETX
NRP1	1.63871538249988e-53	0.319824	0.632	0.524	4.8212645268529e-49	0	NRP1
LCA5	1.79737649951257e-53	0.410301	0.523	0.453	5.28806139921593e-49	0	LCA5
AMOT	1.81470346911131e-53	0.617781	0.311	0.217	5.3390390764724e-49	0	AMOT
SMARCAD1	2.09819931316748e-53	0.262424	0.794	0.746	6.17311219927005e-49	0	SMARCAD1
AC096711.2	2.2511484830864e-53	0.203589	0.871	0.816	6.62310395208849e-49	0	AC096711.2
SETD5	2.31372694876593e-53	0.188752	0.934	0.884	6.80721605596423e-49	0	SETD5
DHX29	2.31429316145859e-53	0.287835	0.662	0.613	6.80888191032731e-49	0	DHX29
PSIP1	2.54694117839659e-53	0.221348	0.846	0.803	7.49335564096062e-49	0	PSIP1
BTBD10	5.05398767365928e-53	0.23312	0.864	0.811	1.4869337134673e-48	0	BTBD10
ADGRB1	5.14529900068542e-53	0.327098	0.651	0.598	1.51379841899166e-48	0	ADGRB1
PTCHD1	5.86481131699282e-53	0.46237	0.522	0.443	1.72548613757246e-48	0	PTCHD1
NUP54	6.53203339765231e-53	0.362861	0.567	0.505	1.92178954592328e-48	0	NUP54
SHANK3	7.43813331720304e-53	0.335591	0.651	0.594	2.18837320325431e-48	0	SHANK3
SUSD4	7.86808496715319e-53	0.21344	0.86	0.792	2.31486927818614e-48	0	SUSD4
YWHAH	9.17112834861274e-53	0.237054	0.656	0.558	2.69823767144535e-48	0	YWHAH
AFAP1	1.58833151875817e-52	0.427106	0.48	0.408	4.67303016133842e-48	0	AFAP1
CPEB2	1.99048389713948e-52	0.275447	0.697	0.63	5.85620267377408e-48	0	CPEB2
AC093297.2	2.25744326476562e-52	0.578156	0.336	0.266	6.64162382926692e-48	0	AC093297.2
NALCN	2.35440123583062e-52	0.121886	0.971	0.921	6.92688387593726e-48	0	NALCN
LINC01266	2.80740919458624e-52	0.641327	0.329	0.241	8.25967859139217e-48	0	LINC01266
AC090517.4	3.88153108215813e-52	0.347385	0.633	0.569	1.14198525968174e-47	0	AC090517.4
BICD2	4.02355878684063e-52	0.495528	0.416	0.347	1.18377123067638e-47	0	BICD2
MDN1	4.50349581010771e-52	0.207829	0.882	0.828	1.32497350229179e-47	0	MDN1
ZNF148	4.74308914598939e-52	0.168841	0.931	0.879	1.39546425764154e-47	0	ZNF148
CDC42EP3	4.95277885085196e-52	0.633691	0.306	0.226	1.45715706570916e-47	0	CDC42EP3
PWAR6	5.62157389591807e-52	0.171751	0.903	0.858	1.65392325591805e-47	0	PWAR6
GPC5	5.98639192784273e-52	0.30384	0.672	0.59	1.76125636909061e-47	0	GPC5
SEC62	6.14935494557812e-52	0.23947	0.739	0.685	1.80920171853854e-47	0	SEC62
VKORC1L1	7.14563998352398e-52	0.285761	0.712	0.651	2.10231873955259e-47	0	VKORC1L1
DRP2	9.39358472851295e-52	0.340286	0.595	0.537	2.76368656297579e-47	0	DRP2
SLC12A5	1.05341218564547e-51	0.232305	0.721	0.658	3.09924399138753e-47	0	SLC12A5
DICER1	1.07626685395799e-51	0.231161	0.835	0.792	3.16648471102981e-47	0	DICER1
KMT2A	1.37259895659619e-51	0.146262	0.961	0.911	4.03832339020164e-47	0	KMT2A
THRAP3	1.41827252527638e-51	0.26084	0.771	0.727	4.17269959661564e-47	0	THRAP3
IGF2R	1.50600318337954e-51	0.29929	0.707	0.649	4.43081196582096e-47	0	IGF2R
DENND4A	1.53409853749522e-51	0.151099	0.958	0.911	4.5134713071647e-47	0	DENND4A
EPHA10	1.71649304021468e-51	0.447748	0.475	0.389	5.05009417361562e-47	0	EPHA10
LINC00158	1.88458967877945e-51	0.58499	0.364	0.281	5.54465129393703e-47	0	LINC00158
CMYA5	3.51909790502762e-51	0.417757	0.55	0.454	1.03535379463818e-46	0	CMYA5
SULT1A1	4.29250639678037e-51	0.352946	0.627	0.565	1.26289830699675e-46	0	SULT1A1
PICK1	5.38456047883104e-51	0.449869	0.427	0.345	1.58419153847688e-46	0	PICK1
C5orf30	5.92291896053311e-51	0.386166	0.563	0.477	1.74258198737845e-46	0	C5orf30
KCNC3	6.06620360185259e-51	0.48858	0.39	0.305	1.78473776170105e-46	0	KCNC3
PRKAA2	7.18360321336857e-51	0.256753	0.816	0.764	2.11348790140517e-46	0	PRKAA2
TTL	7.29420685814999e-51	0.303769	0.664	0.601	2.14602859973631e-46	0	TTL
CEMIP	7.50815109005229e-51	0.115015	0.66	0.549	2.20897313220428e-46	0	CEMIP
ICE1	7.83971755330493e-51	0.258795	0.799	0.748	2.30652330135784e-46	0	ICE1
FH	1.00067266398872e-50	0.670668	0.27	0.2	2.9440790447212e-46	0	FH
ZBTB10	2.37428181844454e-50	0.561206	0.346	0.259	6.98537453804568e-46	0	ZBTB10
FAM153A	2.8649197747655e-50	0.318192	0.664	0.609	8.42888046933757e-46	0	FAM153A
NELFA	2.91063087217497e-50	0.251697	0.796	0.749	8.56336708902599e-46	0	NELFA
DDRGK1	3.5826787871057e-50	0.469386	0.43	0.35	1.05405992595437e-45	0	DDRGK1
C17orf51	3.74165182932725e-50	0.312018	0.63	0.585	1.10083138470637e-45	0	C17orf51
SORCS3	3.89516308492824e-50	0.136058	0.81	0.716	1.14599593121674e-45	0	SORCS3
WBP4	4.92266466389922e-50	0.503915	0.396	0.329	1.44829717076579e-45	0	WBP4
RSBN1L	5.76595469080955e-50	0.260722	0.764	0.72	1.69640152958308e-45	0	RSBN1L
CCDC122	5.9545703577625e-50	0.669147	0.264	0.183	1.7518941449573e-45	0	CCDC122
CTIF	6.66757745415761e-50	0.162205	0.922	0.865	1.96166796278771e-45	0	CTIF
FAM160A1	8.43958792913347e-50	0.456613	0.315	0.216	2.48301116463036e-45	0	FAM160A1
VPS37B	1.01979487917175e-49	0.396335	0.517	0.47	3.0003385140112e-45	0	VPS37B
FOXG1	1.22457983788212e-49	0.350757	0.539	0.467	3.60283634103297e-45	0	FOXG1
NACA	1.72566236367075e-49	0.446904	0.413	0.349	5.07707124015571e-45	0	NACA
ARL17B	2.20077662607248e-49	0.354358	0.542	0.456	6.47490491156784e-45	0	ARL17B
TMEM106B	2.2162762461889e-49	0.247894	0.721	0.668	6.52050634391236e-45	0	TMEM106B
DDX5	2.35508642451523e-49	0.183879	0.875	0.829	6.92889976956626e-45	0	DDX5
RSRC2	2.39722617443753e-49	0.329283	0.591	0.537	7.05287912781264e-45	0	RSRC2
AC009403.1	2.5185040709473e-49	0.507585	0.37	0.323	7.40969082713405e-45	0	AC009403.1
BTAF1	2.92088654612045e-49	0.225311	0.794	0.741	8.59354030734098e-45	0	BTAF1
GRB2	3.35083030922111e-49	0.293651	0.671	0.616	9.85847785275942e-45	0	GRB2
ARMC9	3.64244342110475e-49	0.198962	0.908	0.854	1.07164327892323e-44	0	ARMC9
PRKAR1A	3.91141501047275e-49	0.261978	0.701	0.631	1.15077741023119e-44	0	PRKAR1A
FBXO31	3.98012827002319e-49	0.446951	0.456	0.392	1.17099353832352e-44	0	FBXO31
STK24	4.1704073525044e-49	0.310816	0.616	0.568	1.22697554718032e-44	0	STK24
CHCHD6	4.75376557630246e-49	0.251548	0.783	0.739	1.39860537020395e-44	0	CHCHD6
TRPC4	5.9030006851842e-49	0.332071	0.374	0.27	1.73672183158804e-44	0	TRPC4
DOCK9	7.04671422387738e-49	0.15738	0.917	0.854	2.07321379180696e-44	0	DOCK9
CHST11	7.25402568796518e-49	0.199089	0.596	0.488	2.13420689765624e-44	0	CHST11
KLF8	1.09919365359661e-48	0.648679	0.286	0.215	3.23393764824658e-44	0	KLF8
DZIP3	1.24472895197339e-48	0.185642	0.911	0.861	3.66211704960092e-44	0	DZIP3
SACM1L	1.26633726841714e-48	0.28534	0.642	0.591	3.72569087741006e-44	0	SACM1L
TRAPPC10	1.3477548246561e-48	0.295235	0.658	0.615	3.9652294696207e-44	0	TRAPPC10
CSTF3	1.5656079250764e-48	0.261555	0.783	0.727	4.60617507636729e-44	0	CSTF3
AC096576.3	1.68497646815037e-48	0.558411	0.341	0.268	4.95736926694519e-44	0	AC096576.3
RPS4X	1.73072383386089e-48	0.569114	0.286	0.208	5.09196259160214e-44	0	RPS4X
MGAT5B	2.08457758773287e-48	0.113438	0.763	0.662	6.13303572086888e-44	0	MGAT5B
SLF2	2.25310503864804e-48	0.276481	0.737	0.691	6.62886033420641e-44	0	SLF2
USP53	2.29836606475139e-48	0.349033	0.548	0.496	6.76202279910506e-44	0	USP53
ELF2	3.44064060456527e-48	0.221734	0.802	0.752	1.01227087226915e-43	0	ELF2
GUCY1B1	5.62259653148104e-48	0.235438	0.78	0.72	1.65422412552704e-43	0	GUCY1B1
DHX9	6.40780455805681e-48	0.276273	0.682	0.636	1.88524017902589e-43	0	DHX9
PRDM5	7.00787723001015e-48	0.515225	0.369	0.298	2.06178755984129e-43	0	PRDM5
STAT1	7.85187729982214e-48	0.559949	0.335	0.272	2.31010082038067e-43	0	STAT1
LRRC28	8.44490865910293e-48	0.193956	0.903	0.853	2.48457657659467e-43	0	LRRC28
THAP12	8.70517438019996e-48	0.602751	0.297	0.229	2.56114935439863e-43	0	THAP12
PHC3	1.40867133763481e-47	0.185939	0.897	0.847	4.14445194245539e-43	0	PHC3
AOAH	1.49308568732783e-47	0.674734	0.282	0.212	4.39280740068721e-43	0	AOAH
TTC13	1.75184297512003e-47	0.263867	0.702	0.666	5.15409721710065e-43	0	TTC13
AC117383.1	1.81058680807631e-47	0.611593	0.279	0.202	5.32692744804131e-43	0	AC117383.1
RPS6	3.39138222114857e-47	0.555413	0.28	0.207	9.97778563284122e-43	0	RPS6
NOL10	3.84514741247915e-47	0.233748	0.778	0.733	1.13128082022549e-42	0	NOL10
SHISA7	5.06490133675739e-47	0.454582	0.429	0.364	1.49014462228739e-42	0	SHISA7
PACSIN2	5.43695821425054e-47	0.355839	0.543	0.486	1.59960747621465e-42	0	PACSIN2
KDM5B	6.51954308722968e-47	0.237287	0.795	0.746	1.91811477169385e-42	0	KDM5B
CYLD	6.82249032708418e-47	0.267985	0.67	0.625	2.00724487913144e-42	0	CYLD
LHX2	6.8686464051029e-47	0.411954	0.515	0.423	2.02082445884532e-42	0	LHX2
ADAM10	7.67615044291527e-47	0.200593	0.863	0.815	2.2584002218101e-42	0	ADAM10
N4BP1	8.821841357633e-47	0.282038	0.753	0.701	2.5954739458292e-42	0	N4BP1
ARF1	9.46483896445527e-47	0.2688	0.634	0.565	2.78465027173238e-42	0	ARF1
LRRC37A2	1.0280044140639e-46	0.374516	0.514	0.439	3.02449178661741e-42	0	LRRC37A2
RPS20	1.50128468264175e-46	0.441675	0.403	0.328	4.4169296648003e-42	0	RPS20
FHL2	1.55258488823546e-46	0.396874	0.548	0.482	4.56785999967756e-42	0	FHL2
ANKRD24	2.69149903682435e-46	0.30709	0.682	0.634	7.91865931624094e-42	0	ANKRD24
RPRD2	3.49609816750759e-46	0.173055	0.927	0.883	1.02858704186241e-41	0	RPRD2
SPON2	3.96075074690932e-46	0.679534	0.265	0.192	1.16529247724819e-41	0	SPON2
SLK	4.34521736888063e-46	0.335159	0.573	0.51	1.27840640209837e-41	0	SLK
IQSEC2	4.37501416285311e-46	0.236009	0.783	0.733	1.28717291685301e-41	0	IQSEC2
DIRC3-AS1	4.70216203758763e-46	0.59021	0.287	0.203	1.38342309307866e-41	0	DIRC3-AS1
ETNK1	8.67192650918217e-46	0.183776	0.837	0.788	2.55136749826649e-41	0	ETNK1
TFDP2	8.74539349819222e-46	0.220996	0.919	0.883	2.57298222110313e-41	0	TFDP2
ARHGAP18	1.06874966703638e-45	0.207484	0.282	0.327	3.14436839538773e-41	0	ARHGAP18
RPN2	1.25826818570212e-45	0.475501	0.392	0.334	3.70195082915421e-41	0	RPN2
CASC2	1.45331687489228e-45	0.378457	0.512	0.448	4.27580357762059e-41	0	CASC2
TXNDC11	1.54438949331272e-45	0.330294	0.52	0.486	4.54374832827536e-41	0	TXNDC11
CTTNBP2NL	1.57452809560246e-45	0.333929	0.571	0.518	4.63241911007198e-41	0	CTTNBP2NL
STRN	1.67707817410895e-45	0.253345	0.734	0.682	4.93413169604593e-41	0	STRN
DNAJC2	1.90270518555225e-45	0.340305	0.496	0.459	5.59794892641326e-41	0	DNAJC2
WAPL	2.04209541594499e-45	0.269163	0.681	0.634	6.00804892325175e-41	0	WAPL
NEURL1	2.23593393609839e-45	0.266456	0.705	0.646	6.57834123339507e-41	0	NEURL1
TRAK2	2.29760862951316e-45	0.224366	0.819	0.783	6.75979434889068e-41	0	TRAK2
ZNF618	2.4497102003014e-45	0.480216	0.422	0.356	7.20729238030675e-41	0	ZNF618
CCDC112	2.57503938674774e-45	0.369973	0.498	0.442	7.57602337975052e-41	0	CCDC112
PDIA6	3.33898392715214e-45	0.324063	0.578	0.538	9.8236246120743e-41	0	PDIA6
RASAL1	4.32115722018249e-45	0.497557	0.392	0.325	1.27132766574989e-40	0	RASAL1
MAIP1	4.36365683910007e-45	0.406688	0.49	0.433	1.28383147863163e-40	0	MAIP1
NCAPD3	4.5635284088723e-45	0.413268	0.423	0.373	1.34263569317432e-40	0	NCAPD3
SON	4.84175115226057e-45	0.208852	0.846	0.8	1.42449160650658e-40	0	SON
SCFD1	5.12363903443286e-45	0.203151	0.846	0.804	1.50742584032049e-40	0	SCFD1
NUP153	5.55341642245624e-45	0.255386	0.73	0.683	1.63387064565085e-40	0	NUP153
TRMU	5.71417078297637e-45	0.441998	0.425	0.362	1.68116618605948e-40	0	TRMU
TULP4	6.26471212252089e-45	0.143257	0.934	0.88	1.84314095356687e-40	0	TULP4
TAX1BP1	6.54613486344876e-45	0.187225	0.853	0.805	1.92593833817526e-40	0	TAX1BP1
WWC2	6.62818714335411e-45	0.226713	0.763	0.673	1.95007893944621e-40	0	WWC2
MSL1	6.9320006212082e-45	0.296031	0.584	0.538	2.03946390276567e-40	0	MSL1
EEA1	7.13342471936546e-45	0.225553	0.725	0.697	2.09872488668451e-40	0	EEA1
POLB	8.51239013026213e-45	0.457293	0.399	0.337	2.50443030022442e-40	0	POLB
ESF1	8.55696017254392e-45	0.282364	0.699	0.66	2.51754325236415e-40	0	ESF1
TRAPPC11	1.11275223027415e-44	0.259416	0.667	0.62	3.27382833668958e-40	0	TRAPPC11
AC073332.1	1.58518632242782e-44	0.424725	0.468	0.385	4.66377667921488e-40	0	AC073332.1
ARPC2	1.75198701230478e-44	0.284717	0.641	0.598	5.15452098890189e-40	0	ARPC2
DCTN5	1.87978200966855e-44	0.259587	0.651	0.613	5.53050665064585e-40	0	DCTN5
HNRNPL	2.14990452020324e-44	0.346433	0.58	0.523	6.32523408888995e-40	0	HNRNPL
SLC35F3	2.57198320113919e-44	0.142956	0.951	0.904	7.56703177607161e-40	0	SLC35F3
ECHDC2	2.72961749770323e-44	0.408749	0.468	0.404	8.03080763999268e-40	0	ECHDC2
ST3GAL2	3.64259302835497e-44	0.353664	0.519	0.474	1.07168729487232e-39	0	ST3GAL2
VPS53	4.25578056421583e-44	0.176287	0.915	0.87	1.25209319979794e-39	0	VPS53
COPS2	5.77624155938069e-44	0.273595	0.616	0.578	1.69942802918539e-39	0	COPS2
FAM171B	6.30332339149872e-44	0.183867	0.889	0.829	1.85450077501284e-39	0	FAM171B
NEDD4L	6.58521303890022e-44	0.156271	0.954	0.911	1.93743552817483e-39	0	NEDD4L
DNAH9	6.87065448430729e-44	0.415267	0.468	0.405	2.02141525582805e-39	0	DNAH9
DENND3	9.56884256913874e-44	0.25711	0.723	0.656	2.81524917226631e-39	0	DENND3
SLITRK3	1.04394758901155e-43	0.55744	0.313	0.258	3.07139820163089e-39	0	SLITRK3
SMAP2	1.76867862136597e-43	0.222394	0.789	0.745	5.20362937192083e-39	0	SMAP2
KCNA1	2.05546564241718e-43	0.36759	0.426	0.333	6.04738546655558e-39	0	KCNA1
AC096576.2	2.39231347657754e-43	0.484894	0.385	0.316	7.03842547943879e-39	0	AC096576.2
EIF3L	3.02994836345012e-43	0.410801	0.457	0.415	8.91441108010659e-39	0	EIF3L
ZNF532	3.56976434440696e-43	0.182824	0.882	0.852	1.05026036776797e-38	0	ZNF532
SAMD8	3.59964427522852e-43	0.246543	0.701	0.663	1.05905134221498e-38	0	SAMD8
SLC8A2	6.84609899935553e-43	0.285182	0.71	0.667	2.01419078660039e-38	0	SLC8A2
CCDC181	6.86745087261976e-43	0.517863	0.352	0.293	2.02047272123346e-38	0	CCDC181
PEA15	7.5774503433309e-43	0.288024	0.547	0.465	2.22936166551139e-38	0	PEA15
EEF1A1	8.04684379009287e-43	0.369226	0.425	0.349	2.36746191148322e-38	0	EEF1A1
GTDC1	1.07388066569951e-42	0.105214	0.96	0.913	3.15946430655454e-38	0	GTDC1
PPP1CB	1.09406909469359e-42	0.308706	0.605	0.571	3.21886068349801e-38	0	PPP1CB
MSANTD4	1.35315478596556e-42	0.427296	0.44	0.381	3.98111669578928e-38	0	MSANTD4
ANGEL2	1.40573617095324e-42	0.307627	0.579	0.521	4.13581638856153e-38	0	ANGEL2
AC107204.1	1.48834348067427e-42	0.401603	0.475	0.411	4.37885535449177e-38	0	AC107204.1
PLEKHA7	1.53830981762803e-42	0.398753	0.282	0.196	4.52586131444344e-38	0	PLEKHA7
GAK	2.7286057681194e-42	0.291048	0.678	0.629	8.02783103038409e-38	0	GAK
RPRD1B	3.41018470970572e-42	0.325016	0.539	0.495	1.00331044344252e-37	0	RPRD1B
FAM153B	3.87771445996339e-42	0.388691	0.435	0.396	1.14086237126583e-37	0	FAM153B
MT-CO1	4.97048553895509e-42	0.133688	0.99	0.966	1.46236655041598e-37	0	MT-CO1
SLC9A9	6.14688586280191e-42	0.107369	0.542	0.438	1.80847528969495e-37	0	SLC9A9
TOPBP1	6.22488739336281e-42	0.34836	0.498	0.442	1.83142412000127e-37	0	TOPBP1
CRMP1	6.69237188413377e-42	0.219949	0.736	0.691	1.968962732031e-37	0	CRMP1
GSPT1	8.51903782941706e-42	0.246165	0.714	0.669	2.50638611979279e-37	0	GSPT1
MEF2D	8.52711675162426e-42	0.307501	0.551	0.498	2.50876301949537e-37	0	MEF2D
CCDC57	9.48401787578083e-42	0.215912	0.848	0.805	2.79029289923348e-37	0	CCDC57
FAM3C	9.83619641651453e-42	0.162143	0.682	0.588	2.89390734770274e-37	0	FAM3C
PMPCB	1.0318932308612e-41	0.300276	0.597	0.544	3.03593307451675e-37	0	PMPCB
PRICKLE1	1.28604117315811e-41	0.144652	0.944	0.898	3.78366173554847e-37	0	PRICKLE1
PLA2G4A	1.40848914825423e-41	0.525694	0.267	0.182	4.14391592307878e-37	0	PLA2G4A
MTHFD1L	1.59344850139285e-41	0.234049	0.803	0.75	4.6880848359479e-37	0	MTHFD1L
AC007388.1	2.027969936519e-41	0.191959	0.914	0.87	5.96649035023256e-37	0	AC007388.1
CUTC	2.09030853912689e-41	0.505866	0.338	0.271	6.14989675296522e-37	0	CUTC
EEF2K	2.51477167894266e-41	0.330112	0.547	0.504	7.39870975661721e-37	0	EEF2K
RIMKLB	2.59741318269645e-41	0.342902	0.531	0.468	7.64184932481121e-37	0	RIMKLB
AP3B1	3.07779434006464e-41	0.249421	0.712	0.66	9.05517872790417e-37	0	AP3B1
SETD3	3.2958678129998e-41	0.225184	0.749	0.708	9.69677269262671e-37	0	SETD3
ATP2A2	3.79540603721591e-41	0.129535	0.879	0.828	1.11664641020929e-36	0	ATP2A2
SYNM	3.95973038783916e-41	0.35692	0.43	0.352	1.16499227740616e-36	0	SYNM
ZCCHC17	3.9864665321134e-41	0.279583	0.65	0.603	1.17285831841308e-36	0	ZCCHC17
GLRX	4.21131665536157e-41	0.500123	0.307	0.269	1.23901147317393e-36	0	GLRX
CLVS2	6.02642232787647e-41	0.162064	0.886	0.838	1.77303371308454e-36	0	CLVS2
ATP13A3	7.7389476474692e-41	0.230099	0.672	0.638	2.27687578736191e-36	0	ATP13A3
ELP1	8.95324826069015e-41	0.224441	0.704	0.671	2.63413517077765e-36	0	ELP1
DCUN1D2	1.01200502560545e-40	0.286504	0.663	0.613	2.9774199858338e-36	0	DCUN1D2
MTF2	1.04388104660115e-40	0.234705	0.718	0.674	3.07120242720524e-36	0	MTF2
CCDC93	1.05868036996851e-40	0.258286	0.683	0.646	3.11474351648437e-36	0	CCDC93
ECPAS	1.12457252899401e-40	0.161544	0.885	0.84	3.30860483755327e-36	0	ECPAS
EPG5	1.14201852293032e-40	0.222589	0.731	0.701	3.3599326963133e-36	0	EPG5
DGCR2	1.27953255744786e-40	0.237295	0.671	0.638	3.76451273726734e-36	0	DGCR2
PCDH19	1.30148634137382e-40	0.370875	0.502	0.418	3.82910296495591e-36	0	PCDH19
RILPL1	1.36839966113774e-40	0.308403	0.628	0.571	4.02596864303336e-36	0	RILPL1
XPO4	1.41130309796052e-40	0.209859	0.765	0.733	4.15219484450966e-36	0	XPO4
NCS1	1.43809405698274e-40	0.251467	0.725	0.672	4.23101652504893e-36	0	NCS1
OXSR1	1.5003637825098e-40	0.221624	0.754	0.724	4.41422028452208e-36	0	OXSR1
BCL2	1.52305864624692e-40	0.327275	0.667	0.598	4.48099084312306e-36	0	BCL2
AC090907.2	2.25002585314783e-40	0.488027	0.361	0.304	6.61980106254624e-36	0	AC090907.2
SMG7	2.2790814657269e-40	0.235581	0.704	0.67	6.70528558031511e-36	0	SMG7
SYNGAP1	2.57226254426528e-40	0.298483	0.62	0.575	7.56785363148289e-36	0	SYNGAP1
KIF3A	2.76350652450391e-40	0.138635	0.896	0.842	8.13051254574296e-36	0	KIF3A
PTCD3	3.15963509311959e-40	0.235588	0.68	0.644	9.29596240746715e-36	0	PTCD3
PDCD10	3.80268951490147e-40	0.246415	0.666	0.625	1.11878928217916e-35	0	PDCD10
FYTTD1	4.06775852232147e-40	0.363053	0.479	0.426	1.1967752348522e-35	0	FYTTD1
ADRB1	4.40957837954051e-40	0.594824	0.261	0.191	1.29734205504461e-35	0	ADRB1
CUL1	4.82280944261286e-40	0.197032	0.824	0.784	1.41891876611113e-35	0	CUL1
SLC20A2	4.9239559394071e-40	0.185695	0.876	0.835	1.44867707693296e-35	0	SLC20A2
CHRM3-AS2	5.1228349490113e-40	0.454725	0.341	0.275	1.50718927034862e-35	0	CHRM3-AS2
WDR26	6.72112741756725e-40	0.23797	0.729	0.682	1.97742289752246e-35	0	WDR26
TMEM50A	8.21512308386894e-40	0.323682	0.501	0.437	2.41697136250508e-35	0	TMEM50A
RNF145	8.82390393646259e-40	0.225012	0.762	0.719	2.59608077714666e-35	0	RNF145
RGP1	1.01622315537168e-39	0.537532	0.303	0.255	2.98983014541903e-35	0	RGP1
DDX1	1.07053407282611e-39	0.240011	0.636	0.603	3.1496182956617e-35	0	DDX1
TTI1	1.19546026953681e-39	0.405046	0.427	0.386	3.51716365900425e-35	0	TTI1
CSNK1G1	1.24370160816378e-39	0.436979	0.388	0.333	3.65909450137865e-35	0	CSNK1G1
LACTB	1.39350301907066e-39	0.552813	0.279	0.23	4.09982523240779e-35	0	LACTB
MFSD4B	1.41739267202008e-39	0.551093	0.302	0.253	4.17011098035029e-35	0	MFSD4B
SP3	1.41826381710177e-39	0.27253	0.649	0.6	4.17267397629512e-35	0	SP3
RNF175	1.45413618152603e-39	0.22122	0.78	0.725	4.27821405966772e-35	0	RNF175
SLC25A12	1.46311318134219e-39	0.119724	0.949	0.903	4.30462529082687e-35	0	SLC25A12
CA11	1.75704355728231e-39	0.299585	0.596	0.541	5.16939784988029e-35	0	CA11
H2AFY	2.1457894851728e-39	0.248883	0.727	0.688	6.31312724432689e-35	0	H2AFY
ERGIC2	2.14828615510624e-39	0.264514	0.588	0.542	6.32047269693808e-35	0	ERGIC2
SLMAP	2.21812037734076e-39	0.184032	0.847	0.811	6.52593196217424e-35	0	SLMAP
NDST1	2.34087105740808e-39	0.38699	0.419	0.371	6.8870767380003e-35	0	NDST1
HNRNPM	2.34166351444539e-39	0.255106	0.643	0.599	6.88940822584978e-35	0	HNRNPM
B4GALNT1	2.46445118544661e-39	0.371464	0.412	0.369	7.25066183270247e-35	0	B4GALNT1
TXLNG	2.78617045977402e-39	0.285005	0.6	0.557	8.19719210970116e-35	0	TXLNG
ZMIZ1	2.87216693932963e-39	0.287206	0.608	0.546	8.45020235220169e-35	0	ZMIZ1
INTS8	3.11190041638934e-39	0.256534	0.646	0.607	9.15552221505907e-35	0	INTS8
ACTR2	3.13470457987471e-39	0.168669	0.836	0.779	9.22261434444939e-35	0	ACTR2
RPL37	3.38940308046813e-39	0.291774	0.534	0.486	9.97196280304527e-35	0	RPL37
SP4	3.57805344757968e-39	0.322999	0.552	0.504	1.05269910481242e-34	0	SP4
AC009093.2	3.65745131177309e-39	0.582313	0.255	0.178	1.07605875043676e-34	0	AC009093.2
LRRC8A	8.10160293474588e-39	0.456205	0.332	0.261	2.38357259943159e-34	0	LRRC8A
ATAD2B	1.12841358591615e-38	0.254252	0.66	0.619	3.31990561112391e-34	0	ATAD2B
SMARCA5	1.15674386683855e-38	0.25512	0.647	0.603	3.40325613062569e-34	0	SMARCA5
KLF13	1.26378879001967e-38	0.319745	0.543	0.491	3.71819299911688e-34	0	KLF13
AC097515.1	1.34612671659003e-38	0.556533	0.292	0.233	3.96043941287954e-34	0	AC097515.1
AC116366.3	1.3777157125787e-38	0.292	0.639	0.585	4.05337739797779e-34	0	AC116366.3
MAP4K5	1.75698884022949e-38	0.15291	0.894	0.848	5.16923686683917e-34	0	MAP4K5
MLF2	1.77975156929029e-38	0.285226	0.508	0.448	5.23620709200896e-34	0	MLF2
MFHAS1	1.98820854179751e-38	0.290262	0.644	0.593	5.84950835082246e-34	0	MFHAS1
SEMA4F	2.17076147654008e-38	0.346635	0.502	0.444	6.38659734012857e-34	0	SEMA4F
RGPD8	2.19804547691565e-38	0.515761	0.321	0.264	6.46686959763352e-34	0	RGPD8
RCL1	2.36037293307703e-38	0.323893	0.537	0.477	6.94445320640592e-34	0	RCL1
SPEN	2.36059168418485e-38	0.213536	0.779	0.74	6.94509679404026e-34	0	SPEN
RALGAPB	2.85193116158589e-38	0.239373	0.729	0.69	8.39066667050185e-34	0	RALGAPB
LARP1B	2.87615244220314e-38	0.166917	0.897	0.856	8.46192810020585e-34	0	LARP1B
PSAP	3.75404587942924e-38	0.105114	0.773	0.713	1.10447783818688e-33	0	PSAP
AC008591.1	3.97099087318282e-38	0.344965	0.448	0.445	1.16830522479912e-33	0	AC008591.1
DOPEY1	4.64337790471163e-38	0.131611	0.936	0.889	1.36612821334521e-33	0	DOPEY1
ASB3	5.35205990897608e-38	0.439924	0.381	0.32	1.57462954581985e-33	0	ASB3
C8orf37-AS1	6.35945492209067e-38	0.57886	0.279	0.217	1.8710152326283e-33	0	C8orf37-AS1
NUCKS1	6.56895729945283e-38	0.17033	0.861	0.81	1.93265292707202e-33	0	NUCKS1
HOMER1	6.59992555555944e-38	0.15965	0.904	0.855	1.94176409770114e-33	0	HOMER1
FUBP3	8.56107000167324e-38	0.229011	0.73	0.695	2.51875240519228e-33	0	FUBP3
ZC3H15	1.03154421014087e-37	0.251887	0.592	0.552	3.03490622065545e-33	0	ZC3H15
ASXL3	1.12384473678737e-37	0.190162	0.885	0.832	3.30646360010213e-33	0	ASXL3
VCL	1.31346960283198e-37	0.258058	0.697	0.653	3.86435891849198e-33	0	VCL
TMPO	1.71419344293059e-37	0.392455	0.42	0.368	5.04332852844609e-33	0	TMPO
PPIL4	2.48799429826644e-37	0.273699	0.603	0.56	7.31992802492968e-33	0	PPIL4
TNRC6C	3.52126801796333e-37	0.122591	0.954	0.911	1.03599226356499e-32	0	TNRC6C
SREK1	3.53173480935812e-37	0.213348	0.776	0.734	1.03907169826125e-32	0	SREK1
OCIAD1	3.60851678587208e-37	0.170054	0.819	0.772	1.06166172357143e-32	0	OCIAD1
BDH1	3.85976895099939e-37	0.227687	0.741	0.698	1.13558262307353e-32	0	BDH1
HEATR3	3.91809191733043e-37	0.336718	0.472	0.43	1.15274182299779e-32	0	HEATR3
PIGG	4.45263523125476e-37	0.306855	0.556	0.514	1.31000981138746e-32	0	PIGG
BSG	4.74888887786745e-37	0.263602	0.589	0.529	1.39717059675738e-32	0	BSG
AC002070.1	4.87645607180365e-37	0.400462	0.431	0.343	1.43470214088535e-32	0	AC002070.1
NFX1	5.8496625845176e-37	0.221561	0.799	0.752	1.72102922899092e-32	0	NFX1
SUGP2	6.02977260983734e-37	0.168074	0.866	0.82	1.77401939954024e-32	0	SUGP2
TRAPPC13	6.46899458296656e-37	0.272813	0.569	0.525	1.90324289625459e-32	0	TRAPPC13
C2CD5	6.86071198515426e-37	0.103762	0.95	0.904	2.01849007315223e-32	0	C2CD5
UTP23	7.29952115630706e-37	0.216444	0.746	0.708	2.1475921193971e-32	0	UTP23
MFSD6	8.37584978719128e-37	0.208325	0.769	0.724	2.46425876588955e-32	0	MFSD6
NSA2	1.52003001397384e-36	0.443913	0.368	0.324	4.47208030411243e-32	0	NSA2
IQCE	1.71503401344276e-36	0.314538	0.49	0.457	5.04580157094995e-32	0	IQCE
ORC2	1.76475603363941e-36	0.217545	0.707	0.684	5.19208872657051e-32	0	ORC2
SMG1	2.23927405183063e-36	0.171738	0.897	0.855	6.5881681878909e-32	0	SMG1
BEX1	2.43822933224114e-36	0.257891	0.51	0.432	7.17351451838666e-32	0	BEX1
HNRNPR	2.74180647148284e-36	0.253682	0.618	0.568	8.06666881974967e-32	0	HNRNPR
TMEM132A	2.83928547742139e-36	0.383222	0.387	0.323	8.35346180312146e-32	0	TMEM132A
AC139887.2	2.90738817874856e-36	0.258782	0.68	0.636	8.55382676069615e-32	0	AC139887.2
CHST1	2.95042444323571e-36	0.326371	0.466	0.393	8.6804437544438e-32	0	CHST1
TTC21A	2.96251982463383e-36	0.369331	0.393	0.359	8.71602957605519e-32	0	TTC21A
RPL11	3.54563173922911e-36	0.444655	0.295	0.233	1.0431603139986e-31	0	RPL11
ZC3H12C	3.72040491834544e-36	0.300053	0.53	0.465	1.09458033102641e-31	0	ZC3H12C
RAMP1	4.83649789166221e-36	0.381193	0.391	0.304	1.42294604470594e-31	0	RAMP1
RNF8	5.42485527930411e-36	0.357383	0.443	0.406	1.59604667172406e-31	0	RNF8
BHLHE40-AS1	5.69819442032683e-36	0.473036	0.368	0.307	1.67646578040436e-31	0	BHLHE40-AS1
CYFIP2	5.7231865830452e-36	0.134285	0.889	0.841	1.68381872459773e-31	0	CYFIP2
FAM208A	9.67331352892956e-36	0.22047	0.76	0.712	2.84598557334637e-31	0	FAM208A
SLC16A7	9.69447160703696e-36	0.161944	0.872	0.832	2.85221049150634e-31	0	SLC16A7
GSDME	9.84250919357001e-36	0.52619	0.276	0.221	2.89576462984023e-31	0	GSDME
BCAP29	1.01117175761291e-35	0.169247	0.824	0.763	2.97496842807293e-31	0	BCAP29
SLC8A1-AS1	1.03520450479657e-35	0.307792	0.528	0.477	3.04567517356199e-31	0	SLC8A1-AS1
CRY2	1.08087911685448e-35	0.278261	0.576	0.528	3.18005444969758e-31	0	CRY2
TARSL2	1.13355036224985e-35	0.20336	0.738	0.709	3.33501852077528e-31	0	TARSL2
H2AFY2	1.17822198323453e-35	0.420306	0.393	0.343	3.46644689687431e-31	0	H2AFY2
SEC22A	1.23621484126341e-35	0.23804	0.639	0.611	3.63706768448107e-31	0	SEC22A
LMBRD1	1.275717631954e-35	0.175483	0.845	0.796	3.75328884497185e-31	0	LMBRD1
ZSCAN5A	1.53942274514476e-35	0.263104	0.568	0.542	4.5291356584904e-31	0	ZSCAN5A
TACC1	1.56806649025813e-35	0.167958	0.873	0.836	4.61340842098845e-31	0	TACC1
USP37	1.65119949790755e-35	0.232859	0.686	0.659	4.8579940427938e-31	0	USP37
NDUFA10	1.6899190302425e-35	0.17285	0.85	0.817	4.97191077887645e-31	0	NDUFA10
FGF9	1.80272634628632e-35	0.375429	0.439	0.379	5.30380118340898e-31	0	FGF9
PCID2	1.80744312652014e-35	0.218771	0.671	0.647	5.3176784225349e-31	0	PCID2
TBPL1	1.86164114316026e-35	0.289886	0.562	0.517	5.47713440729179e-31	0	TBPL1
AC005670.2	1.86904565856951e-35	0.276434	0.644	0.605	5.49891923207735e-31	0	AC005670.2
IFT57	1.95041434641942e-35	0.261198	0.577	0.541	5.73831404860057e-31	0	IFT57
PFKL	1.96842479087489e-35	0.355667	0.395	0.33	5.79130257723302e-31	0	PFKL
INPP4A	2.19433528983092e-35	0.109453	0.943	0.894	6.45595385621156e-31	0	INPP4A
IFT43	2.87158209604559e-35	0.233429	0.721	0.694	8.44848168477574e-31	0	IFT43
GOLGB1	2.90273244378756e-35	0.151874	0.904	0.856	8.54012912286737e-31	0	GOLGB1
IL17D	2.96653193698226e-35	0.449425	0.357	0.294	8.72783361179551e-31	0	IL17D
APOO	3.13571431753435e-35	0.244734	0.589	0.526	9.22558509361782e-31	0	APOO
HMGN5	3.26522421664387e-35	0.554541	0.269	0.213	9.60661616778794e-31	0	HMGN5
KCNK12	4.12276157570943e-35	0.384099	0.435	0.386	1.21295768318947e-30	0	KCNK12
MT-ND5	4.37952843011224e-35	0.217258	0.862	0.805	1.28850105942332e-30	0	MT-ND5
SLC41A2	4.45220132038523e-35	0.156402	0.854	0.811	1.30988215047054e-30	0	SLC41A2
SLC13A3	5.4005080499139e-35	0.231105	0.752	0.712	1.58888347336517e-30	0	SLC13A3
ZIM2	6.00702965785522e-35	0.540621	0.28	0.226	1.76732819563759e-30	0	ZIM2
PDZD8	6.01120928539313e-35	0.249501	0.648	0.598	1.76855788385551e-30	0	PDZD8
AFF4	6.02629366017546e-35	0.137256	0.898	0.857	1.77299585776022e-30	0	AFF4
PTPN14	9.8261006050235e-35	0.305975	0.526	0.48	2.89093705900396e-30	0	PTPN14
CRBN	9.86029295564626e-35	0.207112	0.728	0.69	2.90099679048069e-30	0	CRBN
MIR4500HG	1.09653003162773e-34	0.205971	0.715	0.628	3.22610100605195e-30	0	MIR4500HG
FBXO3	1.12825913510184e-34	0.235178	0.625	0.591	3.31945120138312e-30	0	FBXO3
MIR646HG	1.1820350636816e-34	0.284702	0.502	0.41	3.47766536085762e-30	0	MIR646HG
RPF2	1.27138805716864e-34	0.423423	0.371	0.316	3.74055080299587e-30	0	RPF2
RHOT1	1.28460268757924e-34	0.166613	0.875	0.834	3.77942956712689e-30	0	RHOT1
SNHG22	1.3542950063996e-34	0.353707	0.434	0.38	3.98447133832827e-30	0	SNHG22
RAD9A	1.53317806147818e-34	0.185841	0.857	0.815	4.51076317467496e-30	0	RAD9A
ARHGEF9	1.7021882149151e-34	0.153847	0.872	0.829	5.0080079471017e-30	0	ARHGEF9
PM20D2	2.18156201236949e-34	0.461013	0.323	0.268	6.41837359659227e-30	0	PM20D2
CEP57	2.44861646202506e-34	0.210257	0.706	0.672	7.20407449292392e-30	0	CEP57
COG2	2.64470003654245e-34	0.316808	0.486	0.45	7.78097197751154e-30	0	COG2
NF2	2.72328241037614e-34	0.27923	0.531	0.496	8.01216917956764e-30	0	NF2
SAFB2	2.84439587092093e-34	0.238778	0.677	0.636	8.36849709183648e-30	0	SAFB2
WDR33	3.56457459147189e-34	0.186581	0.823	0.79	1.04873349055695e-29	0	WDR33
FAM66C	3.69509082677602e-34	0.172933	0.744	0.729	1.08713267214577e-29	0	FAM66C
GPR89A	3.78239651120044e-34	0.318775	0.447	0.413	1.11281887756028e-29	0	GPR89A
SIDT1	3.79985392553026e-34	0.140999	0.853	0.781	1.11795502343026e-29	0	SIDT1
MT-ATP6	4.15159579710643e-34	0.117767	0.985	0.962	1.22144099946668e-29	0	MT-ATP6
FAM120C	4.28502224036122e-34	0.341021	0.463	0.417	1.26069639333668e-29	0	FAM120C
TRIM11	4.35120561838639e-34	0.498349	0.298	0.231	1.28016820498546e-29	0	TRIM11
DUSP14	4.5087844658543e-34	0.543634	0.258	0.188	1.32652947769899e-29	0	DUSP14
IQCK	4.66005989344083e-34	0.290407	0.53	0.474	1.37103622124923e-29	0	IQCK
HDX	4.84826173212235e-34	0.273356	0.63	0.581	1.42640708420772e-29	0	HDX
KNOP1	5.06591301355687e-34	0.427044	0.38	0.319	1.49044226771857e-29	0	KNOP1
SCCPDH	5.07301740682704e-34	0.294514	0.468	0.428	1.49253245126258e-29	0	SCCPDH
ZNF770	6.42333143137415e-34	0.339754	0.447	0.394	1.88980834042459e-29	0	ZNF770
CCDC138	6.5123959340102e-34	0.254067	0.72	0.678	1.91601200774514e-29	0	CCDC138
TSNARE1	7.29489481790759e-34	0.260282	0.615	0.574	2.14623100437659e-29	0	TSNARE1
POLR1A	7.67330653717598e-34	0.304337	0.491	0.453	2.25756351630255e-29	0	POLR1A
REEP3	8.00919920260954e-34	0.206171	0.704	0.631	2.35638649739975e-29	0	REEP3
FBXO11	8.12658348718291e-34	0.138692	0.925	0.886	2.39092212776408e-29	0	FBXO11
TFG	8.30066297075234e-34	0.216512	0.628	0.601	2.44213805262505e-29	0	TFG
HBS1L	1.00112495076058e-33	0.192312	0.702	0.668	2.94540971763272e-29	0	HBS1L
MKRN2	1.04972843418069e-33	0.454419	0.317	0.269	3.088406026203e-29	0	MKRN2
STRADB	1.11592162102334e-33	0.27536	0.475	0.442	3.28315300121277e-29	0	STRADB
RPL23	1.17299158110129e-33	0.534446	0.253	0.199	3.45105853075811e-29	0	RPL23
ANO4	1.20986984049814e-33	0.189016	0.725	0.666	3.55955805772958e-29	0	ANO4
TCFL5	1.27280935866599e-33	0.43296	0.329	0.271	3.74473241413122e-29	0	TCFL5
KIAA0319L	1.28634538873237e-33	0.168934	0.818	0.786	3.78455676818952e-29	0	KIAA0319L
USP46	1.2975011909449e-33	0.231414	0.587	0.561	3.81737825387899e-29	0	USP46
GLYR1	1.54269902244807e-33	0.201883	0.713	0.683	4.53877479394446e-29	0	GLYR1
WDR43	1.60802227605453e-33	0.269896	0.561	0.517	4.73096233838004e-29	0	WDR43
FAM135A	1.75750968534372e-33	0.146301	0.903	0.857	5.17076924524975e-29	0	FAM135A
ZBTB1	2.10051611731792e-33	0.231801	0.658	0.612	6.17992846876105e-29	0	ZBTB1
EXOC2	2.14181383425957e-33	0.168711	0.862	0.817	6.30143048177509e-29	0	EXOC2
PHACTR3	2.1774212373156e-33	0.104093	0.895	0.838	6.40619102230623e-29	0	PHACTR3
POU3F3	2.21853519866175e-33	0.576792	0.251	0.185	6.52715240798274e-29	0	POU3F3
SSBP4	2.27462603860961e-33	0.282364	0.526	0.48	6.69217726819333e-29	0	SSBP4
KDM1A	2.27542318778833e-33	0.205149	0.734	0.701	6.69452256079203e-29	0	KDM1A
PTPN1	2.43397435996416e-33	0.183148	0.723	0.702	7.16099596445056e-29	0	PTPN1
COA1	2.45744618897498e-33	0.176573	0.817	0.777	7.23005243258327e-29	0	COA1
XRN2	2.9112777188419e-33	0.218589	0.668	0.638	8.56527017660474e-29	0	XRN2
WDPCP	2.92147151561048e-33	0.109964	0.946	0.905	8.5952613460776e-29	0	WDPCP
NSUN3	2.9479618243309e-33	0.353863	0.408	0.366	8.67319848336395e-29	0	NSUN3
AC012358.3	3.02497162880238e-33	0.380773	0.381	0.326	8.89976902909948e-29	0	AC012358.3
KHSRP	3.85231275594742e-33	0.391683	0.361	0.32	1.13338893592729e-28	0	KHSRP
NRDE2	4.19226894479898e-33	0.360994	0.412	0.366	1.23340744624931e-28	0	NRDE2
CTXN1	4.75359492053704e-33	0.362335	0.351	0.279	1.3985551615712e-28	0	CTXN1
ABHD12B	8.56656018392281e-33	0.583779	0.251	0.194	2.52036767171193e-28	0	ABHD12B
AP1M1	8.85284339418984e-33	0.261087	0.576	0.542	2.60459505500459e-28	0	AP1M1
AL117190.2	1.04206934053303e-32	0.195693	0.686	0.65	3.06587220678223e-28	0	AL117190.2
METTL16	1.08621956178346e-32	0.252796	0.569	0.537	3.19576657272311e-28	0	METTL16
MMD	1.12750541271385e-32	0.38111	0.453	0.406	3.31723367474543e-28	0	MMD
KIAA1324	1.25791683015241e-32	0.21021	0.777	0.73	3.70091710599141e-28	0	KIAA1324
PRPF40A	1.30733405467792e-32	0.195902	0.723	0.685	3.84630752226791e-28	0	PRPF40A
LINC01284	1.33164344103275e-32	0.338553	0.528	0.471	3.91782816786244e-28	0	LINC01284
SUMF1	1.36894066445095e-32	0.174428	0.854	0.804	4.02756032888114e-28	0	SUMF1
CTDSPL2	1.82661186472735e-32	0.222361	0.724	0.689	5.37407476721434e-28	0	CTDSPL2
ZMYM5	2.23433535168865e-32	0.26513	0.601	0.564	6.57363803820318e-28	0	ZMYM5
BAHD1	2.76378824114238e-32	0.5322	0.268	0.207	8.13134138426499e-28	0	BAHD1
SEL1L	3.06673373830847e-32	0.238501	0.572	0.532	9.02263733147736e-28	0	SEL1L
MTRNR2L12	3.09524011098683e-32	0.423981	0.516	0.453	9.10650593053436e-28	0	MTRNR2L12
SECISBP2	3.81807112250954e-32	0.229961	0.662	0.63	1.12331470495353e-27	0	SECISBP2
IVD	4.12118304619121e-32	0.31994	0.46	0.407	1.21249326401992e-27	0	IVD
NAPG	4.26871362054723e-32	0.211013	0.663	0.633	1.2558982343012e-27	0	NAPG
ERLEC1	4.86326472542192e-32	0.292407	0.462	0.408	1.43082111486638e-27	0	ERLEC1
VPS45	5.22888821193615e-32	0.194011	0.809	0.774	1.53839120083374e-27	0	VPS45
RIC8B	5.34702744502909e-32	0.180005	0.796	0.758	1.57314894460201e-27	0	RIC8B
MRPS30	6.12341485923492e-32	0.305291	0.464	0.414	1.80156988573551e-27	0	MRPS30
RPGRIP1L	8.83172936830076e-32	0.215367	0.69	0.649	2.59838309744777e-27	0	RPGRIP1L
PPIG	9.17792248730885e-32	0.1889	0.814	0.775	2.70023657499114e-27	0	PPIG
CDK5RAP1	1.25881863523513e-31	0.234827	0.568	0.545	3.70357030672527e-27	0	CDK5RAP1
MBD4	1.28892998172482e-31	0.383851	0.415	0.361	3.7921608992326e-27	0	MBD4
CCDC62	1.32996378012459e-31	0.405028	0.361	0.315	3.91288643750456e-27	0	CCDC62
PIGK	1.3459171825403e-31	0.233705	0.6	0.561	3.95982294275183e-27	0	PIGK
MAST3	1.41573548126535e-31	0.19238	0.734	0.68	4.16523535943078e-27	0	MAST3
ZMYND11	1.53747102770849e-31	0.158904	0.887	0.843	4.52339351062115e-27	0	ZMYND11
DCP1B	1.58719492665387e-31	0.306094	0.463	0.426	4.66968619370836e-27	0	DCP1B
VMA21	1.65934088709757e-31	0.425077	0.304	0.242	4.88194682392976e-27	0	VMA21
LRRK2	1.69715855265649e-31	0.203626	0.78	0.727	4.99321017777067e-27	0	LRRK2
ZFP69B	1.81826170089127e-31	0.490825	0.263	0.224	5.3495077501922e-27	0	ZFP69B
PIWIL4	2.13385992015934e-31	0.442818	0.307	0.261	6.2780292711008e-27	0	PIWIL4
RPL28	2.32617008880005e-31	0.306686	0.408	0.368	6.84382501825862e-27	0	RPL28
FBXO27	2.50222301350854e-31	0.33839	0.487	0.432	7.36179032804348e-27	0	FBXO27
KYAT1	2.8505343728969e-31	0.227794	0.659	0.62	8.38655717849996e-27	0	KYAT1
PKN2-AS1	3.35340059432421e-31	0.310922	0.632	0.706	9.86603988856127e-27	0	PKN2-AS1
MPC2	3.76015531063755e-31	0.374748	0.37	0.321	1.10627529394267e-26	0	MPC2
CBX6	3.97894228250178e-31	0.246525	0.552	0.496	1.17064460893485e-26	0	CBX6
PPP4R3B	4.147234682094e-31	0.200556	0.704	0.664	1.22015791581888e-26	0	PPP4R3B
UBE2G2	4.32308158208234e-31	0.178316	0.721	0.698	1.27189383226445e-26	0	UBE2G2
HNRNPC	5.13904326077319e-31	0.163738	0.833	0.794	1.51195791775208e-26	0	HNRNPC
CUL4B	5.40158570091112e-31	0.33813	0.402	0.364	1.58920052906506e-26	0	CUL4B
GPR19	5.61726178735402e-31	0.460121	0.318	0.272	1.65265459045743e-26	0	GPR19
MLXIP	6.06046345267252e-31	0.263747	0.621	0.588	1.78304895241078e-26	0	MLXIP
SHANK1	9.37080272748963e-31	0.255206	0.546	0.533	2.75698387045472e-26	0	SHANK1
DNAJA4	1.08688653257142e-30	0.352505	0.384	0.344	3.19772886747839e-26	0	DNAJA4
SUDS3	1.21458460770581e-30	0.25553	0.569	0.531	3.57342937433125e-26	0	SUDS3
COX11	1.32543871439209e-30	0.273104	0.497	0.468	3.89957324161297e-26	0	COX11
SPNS2	1.34294804446846e-30	0.324294	0.452	0.401	3.95108744163067e-26	0	SPNS2
MED13	1.54460699771112e-30	0.137765	0.888	0.841	4.54438824796589e-26	0	MED13
SCAMP1	1.56594292316117e-30	0.166027	0.745	0.69	4.60716067423248e-26	0	SCAMP1
NEPRO	1.58071739660283e-30	0.296083	0.459	0.419	4.65062865254518e-26	0	NEPRO
INTS6L	1.76145967387085e-30	0.298295	0.522	0.48	5.18239050649543e-26	0	INTS6L
COQ8A	1.90633463308716e-30	0.253562	0.553	0.514	5.60862712400572e-26	0	COQ8A
PARP1	2.04905800018879e-30	0.319834	0.429	0.398	6.02853354235544e-26	0	PARP1
TTC17	2.07152625882821e-30	0.107133	0.935	0.891	6.09463740609848e-26	0	TTC17
RPLP1	2.1559406128703e-30	0.358436	0.295	0.238	6.34299287712572e-26	0	RPLP1
EIF2S2	2.29477253199862e-30	0.283246	0.363	0.359	6.75145026639315e-26	0	EIF2S2
PPP2R5E	2.36788318965595e-30	0.134962	0.877	0.836	6.96654913228678e-26	0	PPP2R5E
LINC01006	2.36943036504028e-30	0.453105	0.321	0.257	6.97110107698502e-26	0	LINC01006
RPL14	2.93112947046352e-30	0.238471	0.467	0.413	8.62367601505071e-26	0	RPL14
MOSMO	3.33401755393114e-30	0.152442	0.888	0.847	9.80901304542079e-26	0	MOSMO
NIPA2	3.61516173599505e-30	0.404738	0.35	0.298	1.0636167343471e-25	0	NIPA2
MFSD1	3.74495478548906e-30	0.255947	0.513	0.483	1.10180314743874e-25	0	MFSD1
KLHL23	4.05767417651207e-30	0.217192	0.667	0.638	1.19380831947162e-25	0	KLHL23
RNF169	4.07525926597447e-30	0.212028	0.69	0.66	1.19898202864235e-25	0	RNF169
HMCES	4.09509992353795e-30	0.398122	0.343	0.283	1.2048193485041e-25	0	HMCES
CLUAP1	4.12917530741841e-30	0.258066	0.547	0.518	1.21484466719557e-25	0	CLUAP1
PUS1	4.25597921710023e-30	0.3952	0.349	0.304	1.25215164546306e-25	0	PUS1
PFDN5	4.54711234186773e-30	0.397526	0.283	0.228	1.3378059221009e-25	0	PFDN5
CEP83	4.72993448095402e-30	0.229471	0.643	0.602	1.39159402364148e-25	0	CEP83
CUL2	5.19925399775477e-30	0.210821	0.591	0.569	1.52967251867943e-25	0	CUL2
TMEM131	5.7302857921252e-30	0.144827	0.89	0.85	1.68590738290115e-25	0	TMEM131
PNN	5.8585827251617e-30	0.243867	0.552	0.515	1.72365362356982e-25	0	PNN
TRIM33	6.09223233906911e-30	0.146128	0.88	0.838	1.79239567647752e-25	0	TRIM33
ATP2B1-AS1	6.38233226234116e-30	0.411664	0.319	0.273	1.87774597490339e-25	0	ATP2B1-AS1
ZMAT1	6.72305094080718e-30	0.250169	0.597	0.54	1.97798881729488e-25	0	ZMAT1
TOGARAM1	7.80572059215027e-30	0.167005	0.831	0.786	2.29652105541653e-25	0	TOGARAM1
ATF7IP2	8.0229330417916e-30	0.196504	0.743	0.704	2.36042713022551e-25	0	ATF7IP2
HDAC8	8.06958795113755e-30	0.115898	0.928	0.887	2.37415347110418e-25	0	HDAC8
NAA15	8.16648313447227e-30	0.181382	0.757	0.724	2.40266100299309e-25	0	NAA15
SIRPA	8.21293853076401e-30	0.153421	0.818	0.767	2.41632864513608e-25	0	SIRPA
CNOT9	8.75669561330715e-30	0.257277	0.491	0.464	2.5763074163911e-25	0	CNOT9
GIPC2	9.00829573004329e-30	0.271632	0.504	0.458	2.65033068673604e-25	0	GIPC2
PEX26	9.28141701574586e-30	0.30387	0.439	0.417	2.73068570020259e-25	0	PEX26
TUBGCP4	9.58963416634398e-30	0.353725	0.363	0.327	2.82136626808006e-25	0	TUBGCP4
RNASEH2B	1.01328450428432e-29	0.238292	0.589	0.556	2.98118434005489e-25	0	RNASEH2B
B3GNTL1	1.07804085961722e-29	0.427661	0.316	0.273	3.17170401307983e-25	0	B3GNTL1
NUP88	1.09954867776336e-29	0.220256	0.588	0.559	3.23498216484757e-25	0	NUP88
TOR1AIP2	1.14491207456608e-29	0.209759	0.667	0.632	3.36844581458086e-25	0	TOR1AIP2
PTCHD1-AS	1.37699465249231e-29	0.191141	0.729	0.651	4.05125596709762e-25	0	PTCHD1-AS
RAN	1.46516033657989e-29	0.378764	0.323	0.269	4.31064822625168e-25	0	RAN
GIT2	1.60671654116806e-29	0.184491	0.777	0.744	4.72712073577054e-25	0	GIT2
ZBTB21	1.71073242616605e-29	0.367443	0.347	0.288	5.03314587102313e-25	0	ZBTB21
RRAGD	1.97565802916099e-29	0.290413	0.452	0.409	5.81258348759454e-25	0	RRAGD
ARMC8	2.12329973868843e-29	0.162425	0.806	0.764	6.24696016119524e-25	0	ARMC8
PAK2	2.26043705564546e-29	0.213393	0.616	0.583	6.65043186141451e-25	0	PAK2
MFAP3L	2.49331021903059e-29	0.297798	0.466	0.393	7.33556799540989e-25	0	MFAP3L
HLF	2.53969174834193e-29	0.169342	0.808	0.755	7.4720270927968e-25	0	HLF
TNXB	2.54066076027874e-29	0.395274	0.362	0.307	7.47487802281609e-25	0	TNXB
MAP9	2.68929589522931e-29	0.192866	0.644	0.609	7.91217745335415e-25	0	MAP9
RPL30	2.74136464535408e-29	0.298289	0.371	0.306	8.06536892309623e-25	0	RPL30
C11orf58	2.7686036773753e-29	0.159381	0.707	0.683	8.14550887920587e-25	0	C11orf58
CNOT4	2.95767596198013e-29	0.149956	0.857	0.821	8.70177844774174e-25	0	CNOT4
AC034195.1	3.08992098201944e-29	0.418928	0.345	0.33	9.0908565211994e-25	0	AC034195.1
SLC36A4	3.11367847982338e-29	0.174784	0.73	0.704	9.16075345548835e-25	0	SLC36A4
TMEM260	3.11663880845173e-29	0.171239	0.757	0.729	9.16946303834583e-25	0	TMEM260
AP003049.2	3.33357605801859e-29	0.458287	0.257	0.196	9.80771412029648e-25	0	AP003049.2
STX16-NPEPL1	4.01762424879879e-29	0.400569	0.364	0.315	1.18202523023909e-24	0	STX16-NPEPL1
XPO6	4.14180871606739e-29	0.19022	0.713	0.686	1.21856154235419e-24	0	XPO6
SYCP2	4.1532846455426e-29	0.355198	0.432	0.376	1.22193787556509e-24	0	SYCP2
ZBTB25	4.33257379692312e-29	0.259185	0.499	0.459	1.27468653679275e-24	0	ZBTB25
DCDC2	5.4284809089437e-29	0.488553	0.289	0.24	1.59711336822033e-24	0	DCDC2
COG1	5.60041120867472e-29	0.267408	0.439	0.416	1.64769698170419e-24	0	COG1
GPR162	5.76770300609476e-29	0.302393	0.409	0.35	1.69691590142314e-24	0	GPR162
MINK1	5.80299981902589e-29	0.234783	0.551	0.511	1.70730057675561e-24	0	MINK1
AP3B2	6.04395082939175e-29	0.170217	0.769	0.743	1.77819077351535e-24	0	AP3B2
ARMH4	6.4732338824903e-29	0.195416	0.678	0.637	1.90449014056747e-24	0	ARMH4
HEATR6	7.07509138728846e-29	0.378112	0.318	0.282	2.08156263705414e-24	0	HEATR6
ME2	7.22931573104104e-29	0.227169	0.643	0.61	2.12693698122958e-24	0	ME2
FAM131A	7.95772102307566e-29	0.275579	0.445	0.403	2.34124110219909e-24	0	FAM131A
PCED1B	7.97196698283085e-29	0.173786	0.455	0.371	2.34543240601866e-24	0	PCED1B
PIP4K2B	9.78656886799742e-29	0.205545	0.639	0.605	2.87930642665352e-24	0	PIP4K2B
ADCY10	1.03391340808862e-28	0.427529	0.339	0.287	3.04187663793754e-24	0	ADCY10
POU6F1	1.09965469514309e-28	0.288146	0.491	0.442	3.23529407858048e-24	0	POU6F1
AL359915.2	1.18585539645398e-28	0.234839	0.57	0.56	3.48890516190724e-24	0	AL359915.2
MBD1	1.35913664052616e-28	0.315191	0.36	0.328	3.99871591009202e-24	0	MBD1
TRAF3IP1	1.42330677437151e-28	0.214779	0.665	0.628	4.18751086087843e-24	0	TRAF3IP1
ZNF273	1.45128026675131e-28	0.203729	0.714	0.682	4.26981167280904e-24	0	ZNF273
AMFR	1.47959744246192e-28	0.278969	0.458	0.423	4.35312363546722e-24	0	AMFR
SH3GL1	1.51615025758684e-28	0.279122	0.538	0.502	4.46066567284623e-24	0	SH3GL1
GOPC	1.78469327059743e-28	0.25395	0.538	0.511	5.25074607142471e-24	0	GOPC
LANCL2	1.80754340347309e-28	0.218473	0.658	0.624	5.31797344735818e-24	0	LANCL2
LRP1	1.83088662630834e-28	0.17139	0.652	0.617	5.38665154326177e-24	0	LRP1
ARHGAP17	1.88585505400746e-28	0.213092	0.618	0.589	5.54837415439535e-24	0	ARHGAP17
AC011997.1	2.46771675914704e-28	0.228163	0.428	0.426	7.26026947708651e-24	0	AC011997.1
TSPAN14	2.63090299420627e-28	0.272092	0.487	0.434	7.74037969925427e-24	0	TSPAN14
ALMS1	2.66481289085242e-28	0.182981	0.796	0.761	7.84014600617691e-24	0	ALMS1
SDC3	2.81792559948992e-28	0.385271	0.328	0.273	8.2906189062593e-24	0	SDC3
IGSF8	2.83928714748941e-28	0.246531	0.49	0.461	8.35346671662858e-24	0	IGSF8
COL26A1	3.10662595727062e-28	0.131362	0.794	0.728	9.1400042288859e-24	0	COL26A1
MRPL39	3.81737567409742e-28	0.398532	0.293	0.26	1.1231100970762e-23	0	MRPL39
TATDN3	4.57243228882729e-28	0.222919	0.499	0.477	1.34525530369588e-23	0	TATDN3
AC124319.2	4.75702015403669e-28	0.186025	0.764	0.73	1.39956289951914e-23	0	AC124319.2
ADGRA3	5.61302091807426e-28	0.376494	0.295	0.238	1.65140688430663e-23	0	ADGRA3
C2orf72	5.91506172787576e-28	0.208385	0.595	0.55	1.74027031095833e-23	0	C2orf72
YIPF6	6.10850434472436e-28	0.315785	0.354	0.323	1.79718306326135e-23	0	YIPF6
MGA	6.11774990720723e-28	0.170261	0.819	0.779	1.79990320019944e-23	0	MGA
SLC17A5	6.33842493706026e-28	0.206322	0.66	0.626	1.8648280007325e-23	0	SLC17A5
PCGF3	6.86537095994526e-28	0.287457	0.446	0.41	2.01986079012549e-23	0	PCGF3
GDAP1L1	7.49451232700278e-28	0.274811	0.502	0.473	2.20496047172749e-23	0	GDAP1L1
KCNC4	7.882747431271e-28	0.328977	0.382	0.323	2.31918312175424e-23	0	KCNC4
ABR	8.64415575367544e-28	0.120734	0.905	0.864	2.54319706428885e-23	0	ABR
Z94721.1	8.90937989729468e-28	0.339961	0.438	0.392	2.62122865958307e-23	0	Z94721.1
TPMT	1.02259191344755e-27	0.386981	0.313	0.256	3.00856766855404e-23	0	TPMT
YJEFN3	1.04897904768245e-27	0.364146	0.281	0.215	3.08620125618653e-23	0	YJEFN3
AC084337.2	1.12528631672269e-27	0.225	0.491	0.477	3.31070487242983e-23	0	AC084337.2
ZFAND5	1.1395342122104e-27	0.15092	0.653	0.594	3.35262360574422e-23	0	ZFAND5
YY1	1.15510237021878e-27	0.196898	0.627	0.598	3.39842668342066e-23	0	YY1
TAPT1-AS1	1.17371458194128e-27	0.181723	0.809	0.772	3.45318567152944e-23	0	TAPT1-AS1
AC004076.1	1.18532968813189e-27	0.220274	0.592	0.567	3.48735847545282e-23	0	AC004076.1
SLC39A14	1.22435687429619e-27	0.238081	0.519	0.489	3.60218035986682e-23	0	SLC39A14
WTAP	1.35086880814091e-27	0.202028	0.577	0.556	3.97439112043136e-23	0	WTAP
SRRM1	1.37974678357071e-27	0.188901	0.724	0.681	4.05935301194338e-23	0	SRRM1
SAR1B	1.59119598476709e-27	0.252856	0.479	0.443	4.68145770678325e-23	0	SAR1B
HACD2	1.6084918807793e-27	0.194563	0.694	0.651	4.73234396244077e-23	0	HACD2
AGO2	1.61400876603504e-27	0.211232	0.58	0.559	4.74857519055169e-23	0	AGO2
SLC25A23	1.63689468699677e-27	0.291851	0.444	0.415	4.8159078586132e-23	0	SLC25A23
PIAS2	1.67425003333683e-27	0.12746	0.891	0.856	4.92581102308029e-23	0	PIAS2
CCNL1	1.82741524589802e-27	0.255685	0.488	0.453	5.37643839495656e-23	0	CCNL1
HECTD2	1.83261927594728e-27	0.160322	0.811	0.754	5.3917491717645e-23	0	HECTD2
GNPTAB	1.8792553850225e-27	0.15513	0.789	0.745	5.52895726827471e-23	0	GNPTAB
TSPAN13	1.90375785463796e-27	0.191919	0.637	0.606	5.60104598413035e-23	0	TSPAN13
DIAPH1	1.93222582006658e-27	0.204439	0.671	0.64	5.6848015852179e-23	0	DIAPH1
HCG17	1.99788127476207e-27	0.157273	0.786	0.761	5.8779664984775e-23	0	HCG17
DHRSX	2.27424401918459e-27	0.229202	0.65	0.609	6.69105332884298e-23	0	DHRSX
CEP170	2.38801926836877e-27	0.115707	0.908	0.864	7.02579148946776e-23	0	CEP170
C1orf52	2.41928113686084e-27	0.254158	0.485	0.448	7.11776703275829e-23	0	C1orf52
RIOX2	2.43813201070461e-27	0.393528	0.332	0.286	7.17322818869404e-23	0	RIOX2
ORC5	2.63113709695698e-27	0.192123	0.632	0.601	7.74106845295712e-23	0	ORC5
LINC01476	2.70495872601103e-27	0.424088	0.335	0.277	7.95825906779704e-23	0	LINC01476
ARPC5	3.19481904010802e-27	0.32767	0.335	0.303	9.39947709790181e-23	0	ARPC5
CFAP43	3.3276554536023e-27	0.355741	0.373	0.318	9.79029511004332e-23	0	CFAP43
ZNF346	3.46477948684988e-27	0.199258	0.686	0.66	1.0193727728261e-22	0	ZNF346
IAH1	4.22945891930366e-27	0.286085	0.442	0.392	1.24434910864833e-22	0	IAH1
TRIP12	4.27932340024369e-27	0.10611	0.905	0.86	1.2590197375857e-22	0	TRIP12
AP1S3	4.50567425064728e-27	0.346907	0.406	0.361	1.32561442128294e-22	0	AP1S3
ANGEL1	4.95076457660523e-27	0.367931	0.336	0.297	1.45656444608302e-22	0	ANGEL1
MAP3K7	5.0526352286348e-27	0.161792	0.782	0.748	1.48653581061664e-22	0	MAP3K7
CCDC191	6.02773056795571e-27	0.270282	0.486	0.438	1.77341861039825e-22	0	CCDC191
DPM1	6.39588597229647e-27	0.202064	0.598	0.57	1.88173361190934e-22	0	DPM1
EIF3H	6.7301818893919e-27	0.176584	0.632	0.602	1.98008681367799e-22	0	EIF3H
ATP2B3	6.88843873230287e-27	0.227033	0.48	0.438	2.02664755943083e-22	0	ATP2B3
DLG4	7.60682747819088e-27	0.231044	0.5	0.478	2.23800471235854e-22	0	DLG4
MIOS	8.11183066171487e-27	0.227654	0.495	0.473	2.38658169898313e-22	0	MIOS
AL096711.2	8.5118191454065e-27	0.271156	0.452	0.43	2.50426231077005e-22	0	AL096711.2
HS2ST1	8.8925998079161e-27	0.198311	0.701	0.67	2.616291789487e-22	0	HS2ST1
GINM1	9.53811497894161e-27	0.265689	0.432	0.4	2.80620880795441e-22	0	GINM1
LMBR1	1.06853354664049e-26	0.142696	0.822	0.798	3.14373254757099e-22	0	LMBR1
MLF1	1.11458146994229e-26	0.342485	0.365	0.333	3.27921014271722e-22	0	MLF1
FRS2	1.21441048027954e-26	0.161999	0.763	0.729	3.57291707403043e-22	0	FRS2
ACADVL	1.27592664601237e-26	0.254254	0.489	0.449	3.75390378523298e-22	0	ACADVL
PYGB	1.32700782218346e-26	0.229528	0.592	0.56	3.90418971364595e-22	0	PYGB
MIA2	1.36052006620024e-26	0.186171	0.747	0.713	4.00278608676774e-22	0	MIA2
EIF3M	1.37914954156223e-26	0.256278	0.477	0.442	4.05759586623023e-22	0	EIF3M
AC091138.1	1.45068926419804e-26	0.239426	0.522	0.493	4.26807288419707e-22	0	AC091138.1
STIM2	1.85428440986326e-26	0.184271	0.685	0.648	5.4554901622587e-22	0	STIM2
ACYP2	1.86518806461724e-26	0.103048	0.919	0.874	5.4875698049104e-22	0	ACYP2
BCCIP	2.12690823080404e-26	0.278883	0.426	0.397	6.25757670584856e-22	0	BCCIP
LEMD3	2.15519336913534e-26	0.194374	0.671	0.637	6.34079441133308e-22	0	LEMD3
AL031590.1	2.1555183574669e-26	0.426983	0.295	0.246	6.34175055950337e-22	0	AL031590.1
SLC6A11	2.23400792834855e-26	0.388927	0.328	0.284	6.57267472599426e-22	0	SLC6A11
MLH3	2.26446713663061e-26	0.217179	0.632	0.6	6.66228876268093e-22	0	MLH3
RAD21	2.37999693050851e-26	0.215694	0.62	0.575	7.00218896924909e-22	0	RAD21
MAP3K2	2.4500294686097e-26	0.140755	0.835	0.803	7.20823169959659e-22	0	MAP3K2
ZNF451	2.79735310709353e-26	0.145616	0.842	0.808	8.23009257637987e-22	0	ZNF451
ARMH3	2.80860419880313e-26	0.164173	0.815	0.785	8.26319441329868e-22	0	ARMH3
ZNF589	3.06340880406721e-26	0.263455	0.526	0.487	9.01285504244613e-22	0	ZNF589
FBXW4	3.17860277494859e-26	0.162512	0.749	0.721	9.35176722417624e-22	0	FBXW4
TERF2IP	3.54303692099891e-26	0.151953	0.775	0.723	1.04239689252709e-21	0	TERF2IP
KLF9	3.84148833374692e-26	0.224318	0.532	0.496	1.13020428267168e-21	0	KLF9
CREBL2	3.93429648726608e-26	0.318424	0.346	0.302	1.15750936951855e-21	0	CREBL2
BIN3	4.05805545591202e-26	0.280557	0.434	0.403	1.19392049568388e-21	0	BIN3
CCNG2	4.1302872017179e-26	0.36721	0.358	0.31	1.21517179761742e-21	0	CCNG2
TXNRD3NB	4.16208119550468e-26	0.362517	0.335	0.287	1.22452590852943e-21	0	TXNRD3NB
DDX25	4.17987912201744e-26	0.280872	0.443	0.406	1.22976223648875e-21	0	DDX25
SEC23B	4.46519656450743e-26	0.321576	0.358	0.332	1.31370548124373e-21	0	SEC23B
ARNTL2	4.51796399750785e-26	0.174885	0.766	0.716	1.32923018770678e-21	0	ARNTL2
SNX19	5.06394546893098e-26	0.215472	0.544	0.52	1.48986339641418e-21	0	SNX19
PDIA2	5.10506543116724e-26	0.439472	0.252	0.239	1.50196130050371e-21	0	PDIA2
HEATR1	5.20380398420822e-26	0.218189	0.499	0.483	1.5310111701939e-21	0	HEATR1
ATP8B2	5.32138309209775e-26	0.236194	0.498	0.483	1.56560411952608e-21	0	ATP8B2
FGD1	5.43253521412317e-26	0.329198	0.385	0.35	1.59830618534718e-21	0	FGD1
ZNF76	5.59504536935361e-26	0.291316	0.407	0.374	1.64611829811753e-21	0	ZNF76
ITGA3	5.78027154076368e-26	0.244946	0.494	0.473	1.70061369000808e-21	0	ITGA3
CMTR1	6.08631889886729e-26	0.312909	0.402	0.353	1.79065588323574e-21	0	CMTR1
SPEF2	6.50693222706784e-26	0.175828	0.726	0.682	1.91440453052563e-21	0	SPEF2
RMDN3	6.56017984244799e-26	0.270006	0.436	0.395	1.93007051144662e-21	0	RMDN3
GFM1	7.09545448376399e-26	0.2284	0.488	0.468	2.0875536636682e-21	0	GFM1
ISCU	7.28838410871246e-26	0.247791	0.426	0.373	2.14431548862429e-21	0	ISCU
CSDE1	7.66227378688326e-26	0.148257	0.742	0.706	2.25431757083892e-21	0	CSDE1
PPP4R3A	7.95145126167873e-26	0.169631	0.62	0.607	2.3393964756985e-21	0	PPP4R3A
ISCA1	8.1256285074098e-26	0.277762	0.41	0.369	2.39064116316504e-21	0	ISCA1
TRMT61B	8.93129357340728e-26	0.213489	0.568	0.54	2.62767588223216e-21	0	TRMT61B
NAA25	9.15731729339116e-26	0.161936	0.769	0.738	2.69417432088861e-21	0	NAA25
ACBD6	9.4573760148984e-26	0.115913	0.912	0.873	2.78245459734326e-21	0	ACBD6
OGFOD1	9.76937756051637e-26	0.313984	0.335	0.314	2.87424857207952e-21	0	OGFOD1
NEK9	1.0290246680711e-25	0.212688	0.531	0.518	3.02749347593198e-21	0	NEK9
MIR4435-2HG	1.04879556187996e-25	0.213204	0.715	0.705	3.08566142260702e-21	0	MIR4435-2HG
SMARCA1	1.06231751960259e-25	0.181125	0.652	0.627	3.12544437442278e-21	0	SMARCA1
CDK17	1.09968661328295e-25	0.144059	0.827	0.787	3.23538798493977e-21	0	CDK17
CACNG8	1.158690417315e-25	0.148347	0.782	0.745	3.40898307678246e-21	0	CACNG8
C16orf95	1.17713711559184e-25	0.336704	0.394	0.355	3.46325510778274e-21	0	C16orf95
EMSY	1.30261676280274e-25	0.162286	0.739	0.724	3.83242877784195e-21	0	EMSY
PPP1R13B	1.32593356038247e-25	0.143292	0.851	0.806	3.90102912800125e-21	0	PPP1R13B
POC5	1.64089561704226e-25	0.247998	0.428	0.407	4.82767899490003e-21	0	POC5
GOSR1	1.64607973483406e-25	0.180886	0.663	0.638	4.84293118785528e-21	0	GOSR1
RSAD1	1.8829439999616e-25	0.382451	0.297	0.254	5.53980954228701e-21	0	RSAD1
ERGIC1	1.94889154640993e-25	0.205913	0.646	0.619	5.73383381869264e-21	0	ERGIC1
GCNA	1.98693618109434e-25	0.290101	0.468	0.43	5.84576493839767e-21	0	GCNA
CHD1	2.09549733458807e-25	0.18309	0.657	0.628	6.16516270809156e-21	0	CHD1
TAOK3	2.20501399157561e-25	0.11977	0.901	0.857	6.48737166461461e-21	0	TAOK3
XPA	2.32892749120346e-25	0.176117	0.522	0.522	6.8519375718697e-21	0	XPA
ZNF207	2.41348009738258e-25	0.150574	0.821	0.788	7.10069979450927e-21	0	ZNF207
KIAA0513	2.47760477016729e-25	0.159567	0.722	0.689	7.28936099430919e-21	0	KIAA0513
BCR	2.54252778421487e-25	0.226005	0.61	0.566	7.48037099393857e-21	0	BCR
DHX35	2.75264691770287e-25	0.25347	0.444	0.416	8.09856249657361e-21	0	DHX35
COLQ	3.20553125109924e-25	0.199575	0.64	0.624	9.43099349385907e-21	0	COLQ
EHD3	3.23267039509533e-25	0.232191	0.446	0.417	9.51083956940996e-21	0	EHD3
RSPO2	4.0673002491143e-25	0.165172	0.655	0.58	1.19664040629192e-20	0	RSPO2
CAND2	4.45636640045171e-25	0.24541	0.421	0.408	1.3111075586769e-20	0	CAND2
ODR4	4.65447538545113e-25	0.175566	0.649	0.626	1.36939320315358e-20	0	ODR4
FAM228B	4.91217354364511e-25	0.222421	0.653	0.623	1.44521057827583e-20	0	FAM228B
PRR14L	5.5384669473235e-25	0.173216	0.776	0.745	1.62947236057205e-20	0	PRR14L
MED27	5.54893372688534e-25	0.160966	0.843	0.8	1.63255179178694e-20	0	MED27
ERLIN1	6.08091525435635e-25	0.335761	0.353	0.318	1.78906607698418e-20	0	ERLIN1
IFT88	6.10723744526941e-25	0.21647	0.589	0.547	1.79681032877271e-20	0	IFT88
TRRAP	6.33090283214516e-25	0.17903	0.776	0.746	1.86261492224543e-20	0	TRRAP
RHOT2	6.42771370743516e-25	0.287369	0.391	0.363	1.8910976498645e-20	0	RHOT2
SNAPC4	6.55507462318725e-25	0.328887	0.346	0.314	1.92856850488792e-20	0	SNAPC4
SGPP1	6.87477645269811e-25	0.209703	0.525	0.494	2.02262798014831e-20	0	SGPP1
QTRT2	7.32540072556071e-25	0.33299	0.332	0.287	2.15520614746722e-20	0	QTRT2
UBR1	7.40183222216271e-25	0.132813	0.877	0.838	2.17769305808249e-20	0	UBR1
CNBP	7.84014305748536e-25	0.234449	0.436	0.415	2.30664848894277e-20	0	CNBP
TVP23A	8.12947640026192e-25	0.209661	0.643	0.621	2.39177325172106e-20	0	TVP23A
PCBP2	8.64325072282658e-25	0.17276	0.646	0.626	2.54293079516281e-20	0	PCBP2
RUFY1	8.95978606582769e-25	0.219997	0.613	0.588	2.63605865842716e-20	0	RUFY1
IMPA1	9.31361568075193e-25	0.317818	0.405	0.368	2.74015886943403e-20	0	IMPA1
YY1AP1	9.45797555123228e-25	0.199613	0.565	0.547	2.78263098692805e-20	0	YY1AP1
ZNF697	9.5298848081356e-25	0.374017	0.356	0.299	2.80378740940158e-20	0	ZNF697
MRPL19	9.5589427625202e-25	0.200509	0.531	0.5	2.81233655016107e-20	0	MRPL19
AL136317.2	9.56115894479931e-25	0.239662	0.522	0.492	2.81298857314941e-20	0	AL136317.2
VIRMA	9.88772468366347e-25	0.161635	0.548	0.537	2.90906747918063e-20	0	VIRMA
RNF103-CHMP3	9.9653845458321e-25	0.339562	0.34	0.311	2.93191578722926e-20	0	RNF103-CHMP3
RBBP6	1.06138411577604e-24	0.181096	0.74	0.7	3.1226982070247e-20	0	RBBP6
ANKRD49	1.21511723247477e-24	0.421374	0.273	0.245	3.57499640966403e-20	0	ANKRD49
CAMK1	1.22204387325525e-24	0.229152	0.381	0.38	3.59537527950427e-20	0	CAMK1
FSCN1	1.26954425127039e-24	0.32182	0.271	0.212	3.73512614166263e-20	0	FSCN1
AQP4-AS1	1.29476532553742e-24	0.149444	0.825	0.784	3.80932906426365e-20	0	AQP4-AS1
DNM1L	1.30014955194408e-24	0.11538	0.848	0.809	3.82516999677468e-20	0	DNM1L
JHY	1.40437536573923e-24	0.328808	0.362	0.333	4.13181276354138e-20	0	JHY
ZRANB2	1.56884662531789e-24	0.106184	0.91	0.867	4.61570365634776e-20	0	ZRANB2
PPP6R1	1.59587341788891e-24	0.299493	0.4	0.355	4.69521918277096e-20	0	PPP6R1
RABL2A	1.94032136513282e-24	0.246856	0.492	0.46	5.70861948835726e-20	0	RABL2A
GAS2	2.00391388664239e-24	0.189741	0.692	0.644	5.89571504589057e-20	0	GAS2
DNAJA2	2.40180093930468e-24	0.30677	0.337	0.301	7.0663385435283e-20	0	DNAJA2
GNB5	2.48582007606085e-24	0.156462	0.822	0.782	7.31353124577863e-20	0	GNB5
TYSND1	2.59560660323182e-24	0.402691	0.275	0.237	7.63653418736834e-20	0	TYSND1
AGAP6	2.84121167798922e-24	0.201371	0.521	0.507	8.35912887781209e-20	0	AGAP6
TSN	2.85061835589129e-24	0.283067	0.392	0.359	8.38680426486775e-20	0	TSN
LTBP3	3.00956136348671e-24	0.265618	0.465	0.414	8.85443048751425e-20	0	LTBP3
ARFGAP3	3.04682619244336e-24	0.237632	0.45	0.424	8.9640673407876e-20	0	ARFGAP3
EPRS	3.07421781760997e-24	0.182756	0.614	0.592	9.0446562411903e-20	0	EPRS
PTPN2	3.1485445245709e-24	0.157873	0.756	0.728	9.26333284574004e-20	0	PTPN2
RPS15	3.46439447024647e-24	0.246444	0.354	0.302	1.01925949709121e-19	0	RPS15
NSG2	4.21863983624138e-24	0.158719	0.714	0.648	1.24116602622058e-19	0	NSG2
TNKS2	4.42868195586916e-24	0.149153	0.768	0.738	1.30296251823626e-19	0	TNKS2
CWF19L2	5.01260750998019e-24	0.164261	0.739	0.716	1.47475925551127e-19	0	CWF19L2
NDUFA5	5.07152615353505e-24	0.1996	0.557	0.526	1.49209370963155e-19	0	NDUFA5
EBAG9	5.20542385761411e-24	0.326092	0.323	0.296	1.53148775314865e-19	0	EBAG9
TPGS2	5.5012555978371e-24	0.192763	0.568	0.55	1.61852440943965e-19	0	TPGS2
ZNF667	5.94018100077002e-24	0.217775	0.56	0.531	1.74766065223655e-19	0	ZNF667
SLC12A6	5.95747408913455e-24	0.18163	0.656	0.632	1.75274845176428e-19	0	SLC12A6
EIF5	6.04062314108308e-24	0.223566	0.505	0.465	1.77721173433805e-19	0	EIF5
SAFB	6.0974182011928e-24	0.176039	0.6	0.564	1.79392140897293e-19	0	SAFB
AP3S1	6.16135766350617e-24	0.144903	0.745	0.701	1.81273303818015e-19	0	AP3S1
CCNL2	6.80717553585121e-24	0.149441	0.61	0.58	2.00273911440279e-19	0	CCNL2
LENG8	7.33932802498566e-24	0.166037	0.595	0.568	2.15930369823103e-19	0	LENG8
DDX10	7.36025254069277e-24	0.137321	0.812	0.775	2.16545989999722e-19	0	DDX10
GPT2	7.7629948194573e-24	0.262267	0.416	0.385	2.28395070583253e-19	0	GPT2
PACRGL	9.37717066695345e-24	0.184562	0.64	0.608	2.75885738192437e-19	0	PACRGL
GPBP1	9.40242470334578e-24	0.141684	0.85	0.817	2.76628737197136e-19	0	GPBP1
ECHDC1	9.77373813770893e-24	0.176642	0.524	0.517	2.87553149749535e-19	0	ECHDC1
SMIM12	1.0435712193438e-23	0.179329	0.545	0.536	3.0702908844314e-19	0	SMIM12
PURB	1.04470928098419e-23	0.230646	0.45	0.396	3.07363917558359e-19	0	PURB
NEMF	1.094232974505e-23	0.139495	0.83	0.803	3.21934283429116e-19	0	NEMF
FAM133A	1.12062100324399e-23	0.425721	0.256	0.23	3.29697905364414e-19	0	FAM133A
CYP7B1	1.13443272809175e-23	0.280653	0.447	0.409	3.33761452931874e-19	0	CYP7B1
CCDC28A	1.15480733667697e-23	0.211846	0.44	0.428	3.39755866523731e-19	0	CCDC28A
COG3	1.22666085478083e-23	0.166275	0.566	0.553	3.60895890085069e-19	0	COG3
DDX18	1.25053878020789e-23	0.227983	0.474	0.446	3.67921014524964e-19	0	DDX18
USP42	1.30381277908202e-23	0.224396	0.552	0.531	3.8359475773372e-19	0	USP42
OSGIN2	1.31360925782364e-23	0.382218	0.268	0.234	3.86476979744292e-19	0	OSGIN2
PSMG4	1.31688736873749e-23	0.294259	0.407	0.357	3.87441432756258e-19	0	PSMG4
MCM3AP	1.36970672385858e-23	0.192566	0.492	0.471	4.02981415226433e-19	0	MCM3AP
PLXNA1	1.51958961390036e-23	0.252321	0.438	0.414	4.47078460305626e-19	0	PLXNA1
TBCD	1.60638881363885e-23	0.156855	0.818	0.785	4.72615652860687e-19	0	TBCD
INTS11	1.70208370259491e-23	0.267614	0.423	0.385	5.00770046140447e-19	0	INTS11
XRRA1	1.80513980858782e-23	0.167741	0.598	0.593	5.31090183084624e-19	0	XRRA1
AIFM2	1.86195342295482e-23	0.37018	0.325	0.273	5.47805316567539e-19	0	AIFM2
FSD1L	1.95156472931651e-23	0.144054	0.817	0.786	5.74169859012211e-19	0	FSD1L
PHC1	2.00039803201694e-23	0.248998	0.44	0.413	5.88537104999703e-19	0	PHC1
ARPC5L	2.38685977060663e-23	0.349542	0.275	0.246	7.02238013110176e-19	0	ARPC5L
MTFMT	2.54914771953554e-23	0.174647	0.583	0.571	7.49984750564551e-19	0	MTFMT
FAM193B	2.56930250513797e-23	0.179048	0.629	0.609	7.55914490036643e-19	0	FAM193B
C15orf61	2.62905966879117e-23	0.385882	0.259	0.221	7.7349564515505e-19	0	C15orf61
AC098829.1	2.65044158031987e-23	0.337991	0.358	0.311	7.79786417345908e-19	0	AC098829.1
UTP4	2.67474649437157e-23	0.295752	0.356	0.335	7.8693716610906e-19	0	UTP4
ACO2	2.77727678187378e-23	0.177908	0.651	0.619	8.17102601995086e-19	0	ACO2
RPS23	3.08240436653478e-23	0.290757	0.276	0.219	9.06874188678197e-19	0	RPS23
CABCOCO1	3.23169003195144e-23	0.41552	0.306	0.261	9.50795524300433e-19	0	CABCOCO1
GTF3C1	3.36437725756196e-23	0.188492	0.659	0.637	9.89833432947305e-19	0	GTF3C1
TMEM38B	3.47781592529617e-23	0.364295	0.337	0.281	1.02320822338139e-18	0	TMEM38B
SUPV3L1	3.47999306980044e-23	0.21237	0.537	0.517	1.02384876106599e-18	0	SUPV3L1
ZNF441	3.5170505083569e-23	0.41774	0.262	0.22	1.03475143006368e-18	0	ZNF441
LUC7L	3.68668598417776e-23	0.149614	0.817	0.784	1.08465988340494e-18	0	LUC7L
RNF111	3.90215746969699e-23	0.130577	0.825	0.795	1.14805374915955e-18	0	RNF111
ZC3H13	3.97302143780164e-23	0.131529	0.844	0.811	1.16890263721562e-18	0	ZC3H13
CCDC136	4.05446568713974e-23	0.211434	0.517	0.464	1.19286434981338e-18	0	CCDC136
PRPF19	4.3483372343795e-23	0.223799	0.482	0.449	1.27932429772679e-18	0	PRPF19
AAGAB	4.4633111006038e-23	0.183253	0.608	0.587	1.31315075890864e-18	0	AAGAB
SEC13	4.6914128813403e-23	0.305036	0.372	0.337	1.38026058381913e-18	0	SEC13
TRIT1	4.73549612853998e-23	0.217665	0.522	0.511	1.39323031597775e-18	0	TRIT1
AC073610.3	4.8184718001295e-23	0.307418	0.409	0.369	1.4176425883161e-18	0	AC073610.3
USP4	5.30051345396166e-23	0.205421	0.609	0.584	1.55946406329006e-18	0	USP4
ABHD12	5.42996742052824e-23	0.171545	0.627	0.605	1.59755071479361e-18	0	ABHD12
ZBTB11	5.72729940638853e-23	0.212371	0.496	0.472	1.68502875835357e-18	0	ZBTB11
SLC38A2	5.7434871919465e-23	0.150631	0.547	0.518	1.68979136674258e-18	0	SLC38A2
ERO1A	6.24557944826658e-23	0.163657	0.568	0.551	1.83751192947451e-18	0	ERO1A
JUND	6.30663656611426e-23	0.213575	0.609	0.571	1.85547554411648e-18	0	JUND
LRRC34	6.66227292209936e-23	0.308367	0.361	0.312	1.96010731641085e-18	0	LRRC34
PCBP1	7.35901709691352e-23	0.29098	0.381	0.341	2.16509642008293e-18	0	PCBP1
AL161457.2	7.90608463362897e-23	0.332352	0.336	0.301	2.32604916005998e-18	0	AL161457.2
MRAS	8.05666266802836e-23	0.189137	0.566	0.531	2.37035072356062e-18	0	MRAS
AQR	8.10345134539331e-23	0.144721	0.679	0.657	2.38411642032817e-18	0	AQR
RGN	8.32509636904696e-23	0.370931	0.293	0.248	2.44932660273731e-18	0	RGN
CIAO1	8.65645857516398e-23	0.242506	0.435	0.411	2.54681667739899e-18	0	CIAO1
TECPR2	8.79685410378352e-23	0.155577	0.81	0.771	2.58812244587415e-18	0	TECPR2
MPHOSPH9	9.37386795855912e-23	0.136625	0.845	0.806	2.75788569208768e-18	0	MPHOSPH9
LETM1	9.73410885848934e-23	0.28261	0.333	0.317	2.86387216725615e-18	0	LETM1
SLC22A15	1.00130955281079e-22	0.168821	0.697	0.68	2.94595283532462e-18	0	SLC22A15
EIF3B	1.03125823175254e-22	0.283029	0.387	0.367	3.03406484363916e-18	0	EIF3B
CDC123	1.08661170672563e-22	0.171835	0.56	0.548	3.19692030235748e-18	0	CDC123
SASH1	1.088345916567e-22	0.158451	0.475	0.408	3.20202252113176e-18	0	SASH1
CTNNBL1	1.10459415405815e-22	0.170738	0.606	0.591	3.24982646065447e-18	0	CTNNBL1
PDIA3	1.12825880670152e-22	0.200978	0.457	0.444	3.31945023519656e-18	0	PDIA3
KHDC4	1.13495369128935e-22	0.210165	0.483	0.467	3.3391472551424e-18	0	KHDC4
USP10	1.21719921764659e-22	0.165099	0.68	0.662	3.58112181823803e-18	0	USP10
SUCO	1.23902323152517e-22	0.205809	0.54	0.506	3.64533024947019e-18	0	SUCO
RPL5	1.27583298460123e-22	0.23138	0.421	0.403	3.75362822399528e-18	0	RPL5
ATG4B	1.36001172117918e-22	0.198792	0.589	0.559	4.00129048488127e-18	0	ATG4B
RPS9	1.39868762094318e-22	0.237182	0.315	0.263	4.11507884957693e-18	0	RPS9
SDAD1	1.42231451027857e-22	0.207022	0.517	0.489	4.18459152069059e-18	0	SDAD1
NUDT21	1.53808628582303e-22	0.228732	0.496	0.464	4.52520366151994e-18	0	NUDT21
AC025159.1	1.54504134753372e-22	0.202526	0.788	0.764	4.54566614857896e-18	0	AC025159.1
ATRN	1.729655772904e-22	0.117742	0.844	0.807	5.08882024946086e-18	0	ATRN
HACE1	1.73197423106892e-22	0.136226	0.841	0.81	5.09564138522787e-18	0	HACE1
INO80	1.73285864238749e-22	0.170946	0.756	0.722	5.09824341176823e-18	0	INO80
ZNF746	1.80833378073006e-22	0.297176	0.334	0.313	5.32029881628591e-18	0	ZNF746
AXIN1	1.88749007563775e-22	0.217235	0.444	0.432	5.55318455153382e-18	0	AXIN1
SIN3A	1.89660553955791e-22	0.129736	0.407	0.426	5.58000315793334e-18	0	SIN3A
AL442647.1	1.94460757684918e-22	0.290675	0.432	0.407	5.72122995184798e-18	0	AL442647.1
WBP11	2.08188463849298e-22	0.335159	0.332	0.296	6.1251127949102e-18	0	WBP11
IL12A-AS1	2.08429771874809e-22	0.187049	0.554	0.483	6.13221231832875e-18	0	IL12A-AS1
TMEM170B	2.12119999588177e-22	0.160186	0.612	0.588	6.24078250788376e-18	0	TMEM170B
AC079117.1	2.14424070175908e-22	0.410135	0.25	0.2	6.30857056864539e-18	0	AC079117.1
SNX1	2.45629270093688e-22	0.15768	0.642	0.624	7.22665875542638e-18	0	SNX1
CRHR2	2.48060726421061e-22	0.239676	0.271	0.209	7.29819463203404e-18	0	CRHR2
MSH2	2.63174693751428e-22	0.159781	0.784	0.756	7.74286266486076e-18	0	MSH2
TMED10	2.67350440015319e-22	0.211739	0.463	0.426	7.8657172956907e-18	0	TMED10
AL157392.5	2.69527230040861e-22	0.270427	0.37	0.34	7.92976063503218e-18	0	AL157392.5
DMAP1	2.81399016480524e-22	0.393877	0.259	0.224	8.2790404638735e-18	0	DMAP1
KRR1	2.97707433232937e-22	0.177349	0.489	0.474	8.75885039314623e-18	0	KRR1
C4orf47	3.03576389091891e-22	0.244854	0.48	0.446	8.93152094347253e-18	0	C4orf47
PHF12	3.06051195828068e-22	0.197733	0.428	0.426	9.00433223245758e-18	0	PHF12
PSD	3.13893645573724e-22	0.151005	0.614	0.59	9.23506494642455e-18	0	PSD
ZBTB18	3.28694373302338e-22	0.189777	0.64	0.597	9.6705171569281e-18	0	ZBTB18
TTC5	3.34798856783917e-22	0.213248	0.478	0.457	9.85011716543962e-18	0	TTC5
TDG	3.42796530440618e-22	0.229896	0.448	0.415	1.00854167220934e-17	0	TDG
CBL	3.42802131396995e-22	0.173122	0.637	0.614	1.0085581507831e-17	0	CBL
SMPD3	3.55814778438386e-22	0.227848	0.479	0.464	1.04684265964358e-17	0	SMPD3
AC104123.1	4.16599244134878e-22	0.227884	0.443	0.436	1.22567663616922e-17	0	AC104123.1
UVSSA	4.52657080412271e-22	0.138993	0.341	0.359	1.33176239628094e-17	0	UVSSA
SERPINB6	4.55217314872248e-22	0.333565	0.323	0.283	1.33929486208564e-17	0	SERPINB6
DAZAP1	4.83296865398463e-22	0.167167	0.442	0.442	1.42190770768882e-17	0	DAZAP1
FUBP1	4.94522285208079e-22	0.146989	0.678	0.651	1.45493401531069e-17	0	FUBP1
APLF	4.96458971296302e-22	0.419152	0.272	0.228	1.46063193945085e-17	0	APLF
LRRC4B	5.15037570887467e-22	0.186743	0.695	0.672	1.51529203730802e-17	0	LRRC4B
SRP72	5.78928593815198e-22	0.21029	0.474	0.452	1.70326581586369e-17	0	SRP72
JMY	5.85937343155978e-22	0.151397	0.738	0.709	1.7238862572992e-17	0	JMY
TOP2B	6.07769086070367e-22	0.144171	0.776	0.747	1.78811742812763e-17	0	TOP2B
[truncated: 28,606 more rows]

## Sheet: Human EN DEGs No v FTD
	p_val	avg_log2FC	pct.1	pct.2	p_val_adj
C5orf17	8.43747878529969e-264	2.40105	0.229	0.074	2.48239063342302e-259
SOX6	2.55524826002816e-17	1.46516	0.137	0.112	7.51779590582886e-13
AC104389.4	2.24879208667617e-36	1.36047	0.107	0.069	6.61617119820996e-32
LINC02552	3.0712231070906e-197	1.31251	0.316	0.146	9.03584550337127e-193
LIPC	1.6409393040123e-75	1.29424	0.128	0.056	4.82780752633459e-71
ADAMTS9-AS2	8.71756371802635e-221	1.28645	0.403	0.221	2.56479442148053e-216
CTXN3	3.00557959296759e-83	1.20332	0.17	0.082	8.84271572046995e-79
ITGA4	1.31284453293471e-69	1.15886	0.159	0.081	3.8625199003472e-65
AL139158.2	1.89231827960029e-112	1.15299	0.23	0.115	5.56738961041202e-108
ASB2	1.09501471229066e-58	1.14999	0.126	0.061	3.22164278503036e-54
ZBBX	4.88570314501003e-283	1.11665	0.627	0.455	1.4374227222934e-278
ERBB4	3.16436471267341e-27	1.11339	0.442	0.375	9.30987742115644e-23
SLCO2A1	1.83255439070796e-75	1.09777	0.186	0.099	5.3915582729019e-71
AC024909.1	6.84608146935511e-60	1.09197	0.179	0.102	2.01418562909897e-55
P2RY14	5.26126878845742e-122	1.0877	0.374	0.237	1.54791789025206e-117
TRIM5	4.76189790069947e-28	1.08499	0.134	0.098	1.40099798136479e-23
AC007319.1	5.88879436403051e-44	1.08238	0.176	0.114	1.73254218984142e-39
AC005726.5	3.99636082569926e-32	1.07826	0.138	0.089	1.17576931852898e-27
TXK	5.76710059460951e-90	1.06583	0.239	0.134	1.69673866594006e-85
LINC02055	1.05406802417615e-163	1.05531	0.466	0.317	3.10117353392865e-159
ARHGAP26-AS1	5.34502342194308e-35	1.03416	0.128	0.078	1.57255934096987e-30
PRKCA-AS1	1.04353805282401e-29	1.03232	0.138	0.09	3.07019330521352e-25
AL157938.3	1.52263391991391e-27	1.02804	0.107	0.066	4.47974125577872e-23
C6orf10	1.74184322512112e-43	1.02723	0.123	0.067	5.12467695262885e-39
LINC02306	9.59260833229406e-106	1.02115	0.427	0.309	2.82224129744424e-101
LINC00326	2.75806902988314e-33	0.996495	0.12	0.073	8.1145148928192e-29
ADARB2	1.9666193116074e-16	0.99234	0.131	0.158	5.78599067668013e-12
AC007450.1	3.13450014003891e-35	0.987063	0.109	0.062	9.22201286200849e-31
MECOM	1.72451554779095e-26	0.982257	0.126	0.083	5.07369719315576e-22
CFAP97D2	3.88997811018919e-51	0.978517	0.105	0.05	1.14447045979876e-46
LINC01336	3.27467620706551e-68	0.977251	0.19	0.106	9.63442486880743e-64
CAT	1.26721288652813e-66	0.974689	0.227	0.138	3.72826703345441e-62
FN1	7.25290891271467e-30	0.970947	0.147	0.097	2.13387833120978e-25
AC006504.2	2.07361050202147e-37	0.969019	0.155	0.098	6.10076945799737e-33
AFAP1L2	3.96430977826752e-50	0.966312	0.195	0.125	1.16633957986409e-45
AL365273.2	3.13319697998884e-28	0.960449	0.11	0.067	9.21817883482517e-24
AC011511.1	1.11260122439076e-51	0.960279	0.128	0.066	3.27338406228005e-47
KCNMB2-AS1	1.67310567795307e-130	0.952533	0.477	0.34	4.92244421510572e-126
BTNL9	4.18717736941521e-36	0.948427	0.147	0.109	1.23190945385565e-31
AP003049.2	1.31730345458233e-63	0.948215	0.241	0.153	3.87563849372666e-59
PCED1B	7.10018855946579e-193	0.948048	0.457	0.266	2.08894647608043e-188
AC051619.5	2.85997980039033e-52	0.941218	0.169	0.098	8.4143465707284e-48
RPL36AL	3.68106185876584e-38	0.94016	0.155	0.096	1.0830052094675e-33
LINC02263	2.22316158735664e-34	0.933196	0.124	0.076	6.54076370616198e-30
VWA3A	1.44940851029994e-218	0.930543	0.624	0.485	4.26430477815346e-214
ZFP37	1.13244664554367e-30	0.929694	0.114	0.069	3.33177127585402e-26
MASP2	1.20803102200257e-19	0.924915	0.115	0.079	3.55414806983375e-15
AC016576.1	9.36075553127916e-77	0.906325	0.152	0.073	2.75402788485764e-72
AC015971.1	3.86316764215051e-29	0.88808	0.166	0.114	1.1365825519971e-24
BMPR1B	5.78633042472769e-47	0.879945	0.244	0.181	1.70239627425913e-42
AC019130.1	2.60943775762913e-19	0.872891	0.105	0.071	7.67722682672066e-15
PRKCH	3.02236223227115e-42	0.859487	0.155	0.094	8.89209192356495e-38
PNMA5	9.34600644636235e-26	0.854228	0.103	0.063	2.74968855658427e-21
AC013546.1	2.2993311875527e-36	0.850865	0.124	0.072	6.76486228689879e-32
KCNMB2	1.12538856324231e-18	0.846183	0.103	0.069	3.3110056919152e-14
PPFIA2-AS1	3.20021281179015e-45	0.842971	0.216	0.144	9.41534611356781e-41
ACSM3	6.40946316101079e-12	0.840106	0.11	0.085	1.88572815660098e-07
SMCR5	2.16701863987762e-30	0.838876	0.128	0.08	6.37558554038396e-26
SRSF7	1.51697311587865e-203	0.837754	0.639	0.507	4.46308660422657e-199
CPXM2	5.76109640425074e-29	0.837597	0.11	0.067	1.69497217309461e-24
ARMC3	2.14730611029737e-61	0.833271	0.253	0.162	6.31758930710588e-57
FAM163A	7.44131504098049e-69	0.830423	0.222	0.13	2.18930929820687e-64
TRPC6	1.02452908878638e-83	0.822277	0.407	0.298	3.01426703211841e-79
KCNH4	1.44093386828506e-63	0.821191	0.22	0.132	4.23937153388148e-59
LAMA2	2.07335184136697e-115	0.81988	0.525	0.408	6.10000845248576e-111
AC069228.1	5.62267170651693e-86	0.818758	0.46	0.345	1.65424624277435e-81
SLC1A3	7.56314136526835e-08	0.815448	0.129	0.12	0.00222515
RPS25	6.82258026939722e-55	0.813413	0.281	0.195	2.00727134105936e-50
EXPH5	1.07990368413715e-27	0.813359	0.142	0.095	3.1771846290999e-23
RPS3A	3.2815450866924e-23	0.80424	0.146	0.103	9.65463379955772e-19
LINC02153	2.90419378907764e-27	0.803191	0.13	0.087	8.54442854684534e-23
TEC	4.05960449126297e-34	0.801762	0.152	0.097	1.19437623737448e-29
TRIM73	3.36816224403876e-48	0.800289	0.185	0.114	9.90947013818643e-44
BAIAP2L2	3.26352797558493e-67	0.795526	0.314	0.217	9.60162565696842e-63
AC011476.3	7.51008899078439e-90	0.794519	0.347	0.226	2.20954328197868e-85
ALS2CL	7.82703212206278e-52	0.793788	0.195	0.119	2.30279112063209e-47
PLA2G7	5.41481303621734e-44	0.792209	0.179	0.113	1.5930921433855e-39
TUNAR	7.06412120305219e-54	0.791429	0.184	0.109	2.07833509914998e-49
HHAT	1.60010134791275e-120	0.789084	0.565	0.434	4.70765817569411e-116
DNAH5	3.2498442150063e-44	0.788134	0.231	0.159	9.56136666497002e-40
RARRES1	6.87146372071076e-39	0.786598	0.227	0.157	2.02165334127031e-34
CCDC192	2.04470969868753e-32	0.778262	0.225	0.163	6.01574040450859e-28
CKMT2	8.54142640615915e-36	0.77659	0.206	0.144	2.51297306295608e-31
HES4	4.83192355172604e-26	0.774288	0.117	0.074	1.42160022815332e-21
AL353626.1	1.67618141928733e-53	0.771491	0.268	0.182	4.93149335368525e-49
PCSK6	9.36141090973365e-61	0.768462	0.257	0.168	2.75422070375274e-56
LINC01266	2.00870888568135e-58	0.764207	0.291	0.205	5.9098224125631e-54
AC133565.1	9.81352586885876e-15	0.762814	0.107	0.078	2.88723744587694e-10
AC007402.1	4.17194605797605e-49	0.76174	0.287	0.209	1.22742824971713e-44
INHBA-AS1	1.61808162725242e-38	0.760898	0.193	0.131	4.76055795553935e-34
OBSCN	4.54510340055618e-27	0.758715	0.174	0.124	1.33721487147763e-22
PAMR1	2.41823546025176e-63	0.758391	0.237	0.146	7.11469054760671e-59
DNAI1	9.66593559746009e-39	0.757916	0.187	0.123	2.84381491212873e-34
AC004253.1	1.46938713152791e-14	0.757895	0.118	0.087	4.32308387966825e-10
MIR646HG	3.96766212329227e-85	0.756323	0.464	0.37	1.16732587329382e-80
AC027018.1	1.05777601647588e-41	0.752952	0.314	0.236	3.11208281807368e-37
GLP2R	5.27516122041599e-39	0.746688	0.198	0.138	1.55200518265859e-34
TNFRSF14	9.52770220058405e-35	0.744957	0.146	0.091	2.80314526443383e-30
AC107068.2	1.02346687779883e-27	0.74413	0.166	0.114	3.01114190117194e-23
LINC02576	4.89480458289358e-15	0.742269	0.112	0.08	1.44010045633312e-10
DDRGK1	1.85457754453454e-95	0.741842	0.411	0.289	5.45635259377508e-91
PKD2L2	2.81191823841324e-20	0.737823	0.125	0.085	8.27294464923558e-16
AL391807.1	1.14873343736846e-159	0.737328	0.632	0.513	3.37968864608174e-155
DIAPH2-AS1	5.50712980115287e-33	0.726764	0.209	0.147	1.62025265879719e-28
ZNF436-AS1	5.63185595162397e-31	0.726696	0.165	0.11	1.65694833952729e-26
AP002075.1	9.66346512521989e-34	0.726393	0.207	0.153	2.84308807449094e-29
FREM3	1.02650297505121e-39	0.723619	0.22	0.15	3.02007440289818e-35
GPR26	5.19175725539717e-41	0.71878	0.131	0.075	1.5274669021104e-36
CHRDL1	4.21268245323517e-32	0.715549	0.127	0.078	1.23941330456632e-27
HIPK4	1.97672952958383e-24	0.713582	0.18	0.129	5.81573594898858e-20
ABCA9-AS1	2.25399563710162e-12	0.711471	0.104	0.076	6.63148056391667e-08
RPL32	6.28417622350853e-52	0.710079	0.338	0.252	1.84886748671844e-47
AC109779.1	1.95316777989017e-52	0.709293	0.268	0.182	5.74641492521487e-48
LINC01476	2.3278335936682e-74	0.70809	0.328	0.219	6.84871921593122e-70
MARCH10	1.6775362140384e-21	0.706322	0.103	0.066	4.93547929532237e-17
AC008731.1	3.38643955502528e-21	0.704519	0.199	0.152	9.96324381483989e-17
ASS1	1.34314038171544e-14	0.704495	0.104	0.074	3.95165331704501e-10
TANC1	5.81400031714823e-18	0.702524	0.146	0.111	1.71053703330818e-13
CHD7	6.23394440820871e-08	0.702039	0.107	0.086	0.00183409
AC117383.1	4.12034992070796e-28	0.701272	0.239	0.184	1.21224815017149e-23
AC027031.2	1.25095566994924e-55	0.698402	0.257	0.17	3.68043667655766e-51
PRSS12	3.41551404960103e-28	0.694456	0.18	0.126	1.00487838853312e-23
C6orf99	3.15533124213564e-18	0.69347	0.14	0.101	9.28330004748728e-14
AC134312.4	1.81514640502282e-25	0.689672	0.137	0.091	5.34034223821764e-21
C9orf153	1.27819688097339e-31	0.688565	0.175	0.118	3.76058304351182e-27
ZNF213	1.05574676649881e-30	0.687198	0.241	0.181	3.10611256171614e-26
CCDC88C	8.69929310591544e-48	0.687017	0.231	0.152	2.55941902469138e-43
RPL7	4.98815707010431e-31	0.685313	0.233	0.172	1.46756569159539e-26
AP000842.2	1.3828606029396e-10	0.685061	0.11	0.084	4.0685141799086e-06
AC068722.1	3.71769284111412e-17	0.684896	0.111	0.076	1.09378241078419e-12
KCTD21-AS1	1.41757578646701e-39	0.682075	0.124	0.07	4.1706497213646e-35
AL133480.1	1.50562852612009e-15	0.679146	0.117	0.084	4.42970968669792e-11
AC011933.4	2.21267867305647e-11	0.677813	0.125	0.096	6.50992192399944e-07
AL136985.3	1.19415351983641e-25	0.67607	0.138	0.092	3.51331907071071e-21
RPL24	4.31350832529153e-23	0.676064	0.217	0.166	1.26907728438402e-18
WDR64	3.74715016369084e-13	0.673668	0.124	0.105	1.10244904965948e-08
AL157938.2	1.17523914961532e-18	0.670938	0.156	0.114	3.45767110208324e-14
AL365255.1	1.5435965228908e-20	0.670574	0.132	0.091	4.54141532999702e-16
ADGRF5	1.56502275472629e-27	0.667455	0.193	0.138	4.60445344668021e-23
AC112206.2	8.46031384729667e-26	0.665733	0.204	0.153	2.48910893701315e-21
CBLN4	3.43794190851223e-49	0.665393	0.25	0.168	1.01147688890338e-44
AC092338.2	7.53997521339259e-16	0.663831	0.112	0.08	2.21833610753223e-11
AL136298.1	3.98716804784601e-14	0.663454	0.131	0.097	1.17306471135677e-09
GRIK1	1.10331118210821e-31	0.661769	0.19	0.131	3.24605182888057e-27
AL139095.4	1.91356495575999e-17	0.661765	0.136	0.098	5.62989945634148e-13
ONECUT2	2.58297037285265e-59	0.659763	0.254	0.163	7.59935713396979e-55
AL031587.2	6.61747819456861e-15	0.659739	0.1	0.07	1.94692825962403e-10
LRP4	7.31530245286543e-72	0.658599	0.501	0.425	2.15223513465754e-67
AC008067.1	2.02613996505242e-07	0.657341	0.135	0.112	0.00596111
AC092839.1	5.92992442372813e-21	0.656985	0.186	0.139	1.74464306470505e-16
AC023790.2	2.97157657635432e-11	0.656142	0.109	0.082	8.74267544529205e-07
AL138694.1	4.51196844789526e-43	0.65153	0.162	0.099	1.32746623705526e-38
DDX11	6.32858261103197e-22	0.65115	0.138	0.095	1.86193228999172e-17
AL049869.3	1.80684229380511e-15	0.650833	0.123	0.089	5.31591071260401e-11
IL16	2.98875978611029e-24	0.648885	0.151	0.104	8.79323016671507e-20
LINC02320	1.52918808579208e-19	0.647871	0.153	0.112	4.49902426720887e-15
AC008056.1	9.74140113130786e-46	0.646418	0.316	0.229	2.86601762684209e-41
LSAMP-AS1	2.14975740483938e-21	0.645945	0.164	0.118	6.32480126077795e-17
KCNIP2-AS1	3.41681351620634e-18	0.645519	0.127	0.09	1.00526070460307e-13
FRMPD2	7.06089484598765e-20	0.645427	0.115	0.078	2.07738587263803e-15
IGSF10	7.43656910909228e-14	0.643415	0.158	0.123	2.18791299758604e-09
AC012404.1	2.85197534328392e-34	0.642435	0.265	0.195	8.39079665747562e-30
RPA3	1.01352818166796e-17	0.638142	0.151	0.111	2.9819012632853e-13
LINC02301	1.01902484548746e-25	0.637594	0.123	0.079	2.99807299790867e-21
GOLGA8B	4.20269854636103e-202	0.636999	0.77	0.7	1.23647593932488e-197
CACNA2D3-AS1	7.58234694913284e-16	0.635423	0.203	0.163	2.23080229590437e-11
SPON2	1.26012640686878e-46	0.633577	0.236	0.157	3.70741790164864e-42
BCL2L14	7.55024420441096e-21	0.633261	0.246	0.197	2.22135734737975e-16
DPYD-AS1	7.24152410889639e-27	0.632307	0.253	0.195	2.13052880807841e-22
AP001993.1	2.55609424877439e-32	0.630643	0.193	0.133	7.52028488931913e-28
AC007014.1	4.3813761510582e-14	0.630309	0.102	0.072	1.28904467740283e-09
MCMDC2	1.49582987107577e-21	0.629865	0.176	0.128	4.40088106369202e-17
AC011369.1	5.15755412369209e-17	0.62862	0.168	0.128	1.51740399873145e-12
ZNF883	1.09821841040397e-33	0.628318	0.279	0.213	3.23106838524952e-29
FAM160A2	1.2250514684614e-45	0.626472	0.281	0.2	3.6042239253603e-41
ST7-AS2	1.9688979354394e-38	0.626034	0.249	0.176	5.79269461585627e-34
SLCO5A1	3.35137216797575e-20	0.622712	0.179	0.134	9.86007205540144e-16
AC009975.1	3.1856432727155e-24	0.622242	0.165	0.117	9.37248107265627e-20
AC135782.1	1.81889205083735e-20	0.622229	0.126	0.086	5.35136230276857e-16
AC026704.1	5.30097581051761e-33	0.620405	0.244	0.178	1.55960009321239e-28
LINC02355	1.35662941715725e-33	0.620357	0.181	0.121	3.99133940821835e-29
AC008574.1	3.04199166346614e-132	0.620095	0.52	0.359	8.94984367308374e-128
AC025887.2	2.89737971287671e-43	0.616983	0.356	0.275	8.52438085325455e-39
AL139021.1	1.29716282250637e-07	0.616491	0.143	0.119	0.00381638
AC009262.1	1.8326706758052e-23	0.614825	0.139	0.094	5.39190039528648e-19
AC098829.1	2.57890211417283e-27	0.613619	0.339	0.288	7.58738791010789e-23
C8orf37-AS1	4.74244051114902e-35	0.613519	0.254	0.188	1.39527342278515e-30
LMO7-AS1	1.0170995911466e-12	0.613123	0.132	0.101	2.9924087071124e-08
AL592043.1	1.51102420236025e-19	0.613092	0.205	0.16	4.44558430576409e-15
DOK5	1.8110133957887e-90	0.612658	0.559	0.437	5.32818251174993e-86
ETV4	5.96169623370406e-09	0.612452	0.102	0.079	0.000175399
ZBTB48	8.45461036090852e-21	0.609803	0.164	0.119	2.4874309142829e-16
MCHR2	1.42836889643272e-93	0.609766	0.604	0.504	4.2024041301947e-89
CRHR2	1.18496167188247e-45	0.608051	0.251	0.172	3.48627573484543e-41
AC015923.1	2.50051149423098e-65	0.607521	0.401	0.291	7.35675486717697e-61
COL23A1	8.4691272545701e-65	0.602687	0.451	0.344	2.49170192956707e-60
ADAMTSL2	8.72095513063296e-17	0.60221	0.168	0.127	2.56579220898352e-12
CR381653.1	2.87557909051413e-42	0.601827	0.32	0.24	8.46024124220162e-38
OOEP	3.03572681376078e-16	0.601116	0.133	0.098	8.9314118587656e-12
AL158801.3	1.43112079238657e-14	0.599828	0.168	0.13	4.21050048328054e-10
AC022872.1	7.06760164038064e-11	0.599005	0.127	0.099	2.07935907861639e-06
AC073167.1	9.31526329662645e-50	0.598708	0.352	0.258	2.74064361450047e-45
C11orf65	4.55947399748158e-13	0.597269	0.143	0.111	1.34144284479906e-08
AC013472.2	1.30526129412141e-09	0.596683	0.1	0.076	3.84020925343459e-05
GSTK1	1.20125745754149e-27	0.596521	0.32	0.258	3.53421956583282e-23
AJ009632.2	6.79831223020399e-57	0.595456	0.457	0.365	2.00013144124832e-52
TMEM200A	1.83047882369345e-21	0.595393	0.115	0.076	5.38545174718849e-17
ADAM29	1.10347509341968e-21	0.594938	0.132	0.09	3.24653407235005e-17
AC068888.1	2.31522611406747e-20	0.59196	0.203	0.155	6.81162675019792e-16
AL158058.1	4.61853372983717e-24	0.590923	0.128	0.085	1.35881880865539e-19
ABHD12B	1.97076650748911e-33	0.589766	0.23	0.164	5.79819214168371e-29
AC009690.2	4.34072510968232e-34	0.588754	0.297	0.227	1.27708473451964e-29
LPCAT2	1.00825490815667e-17	0.587241	0.107	0.072	2.96638676528775e-13
SAMD3	3.31207074415156e-32	0.584309	0.173	0.115	9.74444333636829e-28
PODXL	1.53001400545795e-34	0.583628	0.208	0.144	4.50145420545785e-30
RUNDC3A-AS1	5.75946431970268e-29	0.583353	0.27	0.207	1.69449199749972e-24
ZBTB24	1.79462626007555e-21	0.58268	0.17	0.124	5.27996991976828e-17
WFDC1	4.96317998341634e-22	0.581824	0.143	0.1	1.46021718292092e-17
NECTIN3	1.36188077992572e-156	0.581228	0.797	0.751	4.00678944261945e-152
AC078909.1	1.07276138436644e-22	0.580915	0.151	0.106	3.1561712689445e-18
AP003393.1	3.38936682892076e-17	0.580434	0.116	0.081	9.97185614736778e-13
LINC00620	4.14165810302762e-19	0.580334	0.105	0.07	1.21851723049176e-14
AC026202.2	5.88699486966813e-13	0.578792	0.149	0.115	1.73201276060506e-08
ARL4A	1.76962589657381e-40	0.578666	0.349	0.276	5.20641635030981e-36
TWIST2	1.36684378380609e-44	0.578419	0.1	0.053	4.02139109633589e-40
MIR7-3HG	2.05068815825139e-21	0.578151	0.202	0.153	6.03332963039141e-17
SYT10	2.85342212751204e-09	0.57705	0.148	0.129	8.39505324135318e-05
SPDYE2	1.2601864618039e-12	0.576824	0.159	0.126	3.70759458927327e-08
AC091887.1	8.20731463666106e-12	0.576694	0.135	0.104	2.41467403925205e-07
AL138799.4	3.58863930152467e-17	0.576148	0.142	0.104	1.05581356890157e-12
AC069287.3	4.47247786391207e-10	0.575173	0.143	0.115	1.31584771234157e-05
AC087857.1	1.09774706575385e-18	0.575079	0.11	0.074	3.22968164215441e-14
DNAJC5G	2.39233673774569e-33	0.574318	0.206	0.143	7.03849391612159e-29
AP001011.1	1.3174700878906e-12	0.57377	0.218	0.181	3.87612874558294e-08
RPL35	1.8077224635499e-14	0.573515	0.186	0.151	5.31850026001017e-10
RIN1	7.98489737118983e-11	0.572828	0.131	0.103	2.34923665557776e-06
ECT2L	1.04451799413235e-19	0.571299	0.17	0.126	3.07307639053679e-15
ARL17B	1.69008376556532e-92	0.569506	0.49	0.45	4.97239544666972e-88
ZNF451-AS1	1.24601451496398e-17	0.569432	0.194	0.15	3.66589930447554e-13
OPRL1	2.8581208186349e-26	0.568761	0.14	0.092	8.40887726050573e-22
HACD1	1.61429108569192e-31	0.565908	0.207	0.146	4.74940580321419e-27
MIR3976HG	2.71743398338968e-25	0.565907	0.195	0.142	7.99496252253079e-21
AL359317.2	5.86230994797661e-18	0.565885	0.212	0.165	1.7247502097942e-13
GNAL	3.10385374095587e-57	0.565439	0.465	0.413	9.13184809126627e-53
AC026167.1	6.23367942556677e-14	0.565308	0.117	0.086	1.834010823796e-09
SAT2	4.01214052947059e-52	0.563837	0.428	0.345	1.18041186517554e-47
MTCP1	2.31701757940137e-10	0.563274	0.152	0.126	6.81689742035678e-06
OTOGL	9.38460639712982e-65	0.561592	0.475	0.368	2.76104504809956e-60
LINC00390	7.9723689239763e-25	0.559634	0.148	0.101	2.34555066112307e-20
DLGAP1-AS5	9.85410082444474e-27	0.55926	0.173	0.12	2.89917500355989e-22
TK2	6.63332286887886e-31	0.556651	0.247	0.183	1.95158992125285e-26
SYT9	9.15468890086143e-46	0.555254	0.368	0.279	2.69340102152244e-41
Z99774.1	4.1636642431256e-10	0.554463	0.274	0.246	1.22499165696998e-05
CES4A	4.32537082389392e-58	0.553318	0.476	0.389	1.27256735009783e-53
NECTIN3-AS1	5.03933723573132e-40	0.553021	0.299	0.22	1.48262340812451e-35
RPL35A	8.68693025166104e-31	0.552679	0.266	0.202	2.55578174934119e-26
SLC24A5	4.81874619932004e-08	0.552609	0.109	0.087	0.00141772
CCDC85C	6.41959690171552e-17	0.552346	0.151	0.111	1.88870960445372e-12
ILF3-DT	1.1107147671713e-22	0.551653	0.193	0.143	3.26783391649468e-18
TPBG	7.11263253192042e-24	0.551025	0.147	0.102	2.09260761721631e-19
AL031280.1	9.39685876185994e-10	0.551005	0.132	0.104	2.76464981632681e-05
CCDC65	2.4775765659155e-31	0.550652	0.36	0.294	7.28927801457998e-27
MAML2	2.43588580645375e-34	0.550593	0.408	0.343	7.16661963116758e-30
MYRFL	2.22830824138295e-08	0.547434	0.113	0.089	0.000655591
FGF22	5.24039967525633e-24	0.547296	0.111	0.071	1.54177798845717e-19
PDZK1	1.80593727986948e-16	0.546963	0.144	0.106	5.313248071104e-12
RPS4X	6.79590266032921e-22	0.545444	0.243	0.194	1.99942252169546e-17
PCDH8	6.23388143070852e-32	0.545344	0.213	0.151	1.83407025572875e-27
PAH	1.86962186057597e-15	0.545147	0.122	0.087	5.50061447600055e-11
CFAP299	5.64022240195231e-60	0.544697	0.534	0.436	1.65940983287839e-55
NOS1	4.29423635085163e-11	0.544535	0.135	0.105	1.26340727678406e-06
AP001825.1	1.1740714251535e-48	0.543465	0.483	0.393	3.45423553994411e-44
AP000462.1	7.82517407558394e-12	0.543309	0.197	0.161	2.30224446477755e-07
AP001266.2	1.59896709029523e-32	0.543144	0.327	0.256	4.70432107635758e-28
CAV3	4.36012468833434e-15	0.54252	0.168	0.129	1.28279228455485e-10
EPB41L2	3.67929538559343e-311	0.542163	0.913	0.911	1.08248549539544e-306
AC117944.1	2.72941319957796e-13	0.541801	0.16	0.124	8.03020657447832e-09
C12orf40	1.69883247238557e-34	0.540995	0.385	0.306	4.99813501700558e-30
CLDN16	1.63453555819103e-19	0.540917	0.212	0.163	4.80896706575382e-15
LYPD8	9.8518872806554e-47	0.538627	0.375	0.285	2.89852375684163e-42
EYS	2.44203123361934e-19	0.536996	0.3	0.258	7.18470009243147e-15
PKN2-AS1	1.43056521596511e-67	0.536971	0.71	0.646	4.20886592189094e-63
ADHFE1	7.75340443589697e-22	0.536172	0.223	0.172	2.28112911908525e-17
C8orf59	2.08149185693389e-25	0.535972	0.262	0.203	6.1239571922852e-21
AL512422.1	5.62458678907881e-08	0.535897	0.136	0.113	0.00165481
SPDYE5	2.57065669269328e-21	0.535309	0.237	0.184	7.56312905557289e-17
PLEKHA7	3.47736732697888e-21	0.534788	0.233	0.184	1.02307624127046e-16
MRPL27	4.54215452888897e-14	0.534289	0.142	0.107	1.33634728394442e-09
AC023389.1	2.88727332915309e-14	0.533244	0.189	0.152	8.4946468617013e-10
DUOX1	2.37354462357475e-14	0.532669	0.189	0.15	6.98320563701927e-10
AC093607.1	3.12263768087546e-33	0.532493	0.305	0.236	9.18711232090368e-29
USHBP1	9.56303015072107e-14	0.532434	0.134	0.1	2.81353910064365e-09
COPS5	4.03199485195923e-10	0.532157	0.132	0.104	1.18625320539493e-05
PDE5A	3.4238328609688e-63	0.531933	0.542	0.432	1.00732586602563e-58
KIF24	4.71383873476679e-13	0.531457	0.113	0.083	1.38685849415574e-08
SMUG1	1.02656926906852e-31	0.531351	0.19	0.131	3.0202694465265e-27
AC044781.1	5.37678977264101e-16	0.531335	0.18	0.138	1.58190531900871e-11
F5	3.58196101711265e-10	0.531334	0.129	0.102	1.05384875084471e-05
TPD52L1	2.1031005142794e-20	0.531273	0.249	0.195	6.18753202306141e-16
RPL23A	3.62024295646883e-15	0.530958	0.195	0.154	1.06511168022269e-10
PRMT8	1.0937149379581e-97	0.530547	0.672	0.58	3.21781871896651e-93
AP002336.2	4.97440367668976e-15	0.526684	0.31	0.268	1.4635193057189e-10
RFPL2	7.23966395166938e-55	0.525586	0.329	0.233	2.12998153122065e-50
RPL3	1.31983171687064e-21	0.52508	0.207	0.159	3.8830768942051e-17
LINC00507	2.1374507287218e-56	0.524767	0.364	0.264	6.28859378897242e-52
OVOL2	8.08776160532898e-33	0.524616	0.22	0.156	2.37950034190384e-28
AC018742.1	1.34366858208307e-27	0.523808	0.191	0.136	3.9532073353466e-23
AC005920.2	4.79257755910103e-09	0.523074	0.167	0.138	0.000141002
G2E3-AS1	1.87919603816042e-11	0.522738	0.151	0.121	5.52878266387177e-07
LINC02340	1.08933049738929e-19	0.522444	0.223	0.174	3.20491925636902e-15
PRKG2	4.69670211042027e-47	0.52236	0.345	0.255	1.38181672790675e-42
IQANK1	2.58054214912047e-29	0.521445	0.151	0.1	7.59221305692732e-25
AC015849.3	3.95780504616225e-08	0.52117	0.148	0.122	0.00116443
TMEM132C	2.33730678619589e-32	0.518984	0.351	0.278	6.87659029566693e-28
RDH11	1.1008758001501e-23	0.518969	0.17	0.121	3.2388866916216e-19
FSIP2	1.09352870127586e-06	0.517791	0.116	0.094	0.0321727
SMAD3	1.7124962594934e-96	0.51734	0.658	0.61	5.03833524505552e-92
PTPRQ	1.15124244920353e-29	0.517254	0.285	0.218	3.3870704098017e-25
TDG	1.77789332975881e-42	0.516527	0.451	0.37	5.23073996548341e-38
CHRNA7	9.31086769247663e-14	0.515821	0.201	0.165	2.73935038380355e-09
DMKN	7.8031264368326e-45	0.515453	0.193	0.123	2.29575782898052e-40
KIZ-AS1	5.2945620020353e-12	0.514775	0.168	0.134	1.55771308661881e-07
ACSS3	1.41339198066844e-14	0.513705	0.219	0.177	4.1583405463246e-10
AC243964.2	1.66850546591264e-23	0.513602	0.224	0.169	4.90890993126159e-19
RPL6	8.41798906096751e-37	0.513571	0.366	0.289	2.47665656162725e-32
FFAR4	2.77483952470542e-21	0.513449	0.123	0.084	8.16385536563582e-17
C17orf100	1.16824083192949e-21	0.513371	0.164	0.118	3.43708135161975e-17
KCNN2	3.39197628415662e-90	0.512997	0.721	0.67	9.97953342561718e-86
AL020995.1	5.44693978898615e-07	0.512906	0.124	0.103	0.0160254
ZNF749	8.29627066462317e-11	0.512832	0.149	0.119	2.44084579223878e-06
C12orf42	4.83644020776943e-19	0.511724	0.161	0.117	1.42292907352785e-14
AL365356.1	2.27529994439393e-11	0.511497	0.129	0.099	6.69415996640137e-07
SLC22A6	9.69556422667207e-08	0.510506	0.124	0.1	0.00285253
BAIAP2L1	1.41639714421827e-11	0.510452	0.138	0.107	4.16718203800458e-07
PDIA2	2.41001625466951e-18	0.510447	0.252	0.222	7.09050882286315e-14
SLFNL1-AS1	5.94271454147673e-10	0.509185	0.108	0.082	1.74840604524787e-05
RPL34	6.44552645051385e-20	0.509141	0.299	0.25	1.89633833700568e-15
RPL14	9.39817608348937e-33	0.508672	0.449	0.383	2.76503738552341e-28
AL392023.2	5.25447846527296e-23	0.508477	0.287	0.231	1.54592010926796e-18
LINC00443	5.88284123264169e-21	0.507581	0.101	0.066	1.73079071905551e-16
CTH	1.90162716216441e-10	0.506934	0.166	0.136	5.5947772738039e-06
RPL10A	7.30656921249714e-26	0.503126	0.202	0.148	2.14966572800878e-21
USP2-AS1	4.95712498687112e-38	0.502951	0.381	0.301	1.45843574238735e-33
LINC01090	2.45320651877645e-31	0.502917	0.268	0.2	7.21757889889219e-27
AC001226.2	1.47746076924638e-31	0.50143	0.371	0.295	4.34683732919978e-27
PPP1R11	1.02087211960464e-10	0.50069	0.171	0.138	3.00350786308882e-06
AP4M1	1.1379425370277e-14	0.500611	0.154	0.117	3.34794073818921e-10
ABCC4	8.04570956847028e-22	0.50024	0.283	0.226	2.36712821213964e-17
PRR14	1.17005189297736e-07	0.499921	0.135	0.113	0.00344241
RPS8	9.70971330341158e-30	0.49973	0.347	0.28	2.85669475099672e-25
NBPF11	1.95570566692384e-36	0.49945	0.378	0.307	5.75388164265663e-32
RPS27A	6.5216350222469e-17	0.498366	0.223	0.182	1.91873023989526e-12
AL139294.1	2.00381900228378e-21	0.497648	0.228	0.175	5.89543588661911e-17
TRMT10B	7.87677427978854e-28	0.497565	0.355	0.29	2.31742576085659e-23
SCART1	1.9210412318785e-19	0.497556	0.139	0.098	5.65189540830974e-15
VWA5B2	1.56311185813551e-23	0.497537	0.353	0.297	4.59883139782049e-19
MYO1B	8.4774238641698e-47	0.497452	0.376	0.283	2.4941428750774e-42
CFTR	4.16979749863908e-15	0.496137	0.125	0.09	1.2267961220746e-10
IFIT3	5.33084097084742e-13	0.495329	0.185	0.147	1.56838672203302e-08
TNFRSF11A	1.42944823206821e-26	0.49481	0.196	0.141	4.20557964356787e-22
CC2D2B	7.97146816178047e-16	0.494521	0.134	0.098	2.34528564787743e-11
POP1	4.25610939641225e-21	0.493086	0.319	0.266	1.25218994551845e-16
PCA3	4.08312644005229e-15	0.492827	0.192	0.151	1.20129662992779e-10
MMD2	7.7018693971937e-31	0.492815	0.231	0.168	2.26596699534836e-26
AP003086.2	1.66531182075284e-06	0.492049	0.232	0.205	0.0489951
TTN	3.77437557473222e-39	0.491696	0.408	0.322	1.11045903784197e-34
NAGPA	3.63566736768454e-56	0.490447	0.548	0.468	1.06964969624647e-51
C10orf67	4.95362586843766e-21	0.490179	0.207	0.157	1.45740626675304e-16
SLC29A4	5.05001279769043e-11	0.489341	0.122	0.094	1.4857642652085e-06
PLA2G4A	4.1225345607675e-39	0.488716	0.226	0.156	1.2128908931234e-34
SLC29A3	7.09519187740911e-15	0.487752	0.166	0.127	2.08747640225254e-10
RSPH1	1.87387359921886e-22	0.486597	0.24	0.186	5.51312351626181e-18
AL035427.1	3.4160412967824e-13	0.485161	0.141	0.108	1.00503350992635e-08
AC002429.2	3.39643714146559e-20	0.484835	0.281	0.225	9.99265771390592e-16
BBOX1-AS1	1.9369244485632e-26	0.482567	0.333	0.267	5.6986254201178e-22
LRRC2	3.01428237085086e-31	0.48231	0.38	0.313	8.86832016328032e-27
UVSSA	8.90528873051868e-40	0.481902	0.381	0.305	2.6200249974059e-35
IDH2	1.92558697079122e-35	0.481483	0.305	0.23	5.66526942676483e-31
RPH3AL	3.27346112260387e-23	0.480927	0.214	0.16	9.63084996881285e-19
COL18A1	3.16932788873522e-14	0.480418	0.151	0.117	9.32447958144789e-10
EEF1B2	3.55452761482145e-12	0.480201	0.122	0.094	1.04577756955662e-07
CHRM3-AS2	1.87228477719161e-22	0.479299	0.312	0.251	5.50844904297544e-18
COPS6	2.61132406566697e-30	0.477753	0.311	0.244	7.6827765335988e-26
FGF5	3.94151759673881e-26	0.477455	0.305	0.241	1.15963389213652e-21
MSTO1	3.10945897452199e-09	0.477324	0.117	0.092	9.14833924894115e-05
AC011900.1	9.80882023243684e-16	0.476307	0.214	0.17	2.88585300058524e-11
COL4A1	1.51327334027729e-35	0.476062	0.277	0.204	4.45220149442982e-31
HHIPL1	4.52971666710818e-17	0.475047	0.232	0.185	1.3326879406299e-12
AL117190.2	3.43930256105639e-70	0.474844	0.689	0.601	1.0118772064884e-65
AC015853.3	4.93574703770575e-09	0.474747	0.142	0.116	0.000145215
RAI14	9.94501269923017e-09	0.47468	0.121	0.096	0.000292592
GOLGA6L7	1.507341361975e-13	0.474565	0.145	0.11	4.43474902106665e-09
RPS18	1.48743462499388e-13	0.473891	0.161	0.128	4.37618141019451e-09
RPL21	4.47679575382224e-27	0.472916	0.155	0.104	1.31711807873204e-22
RASGRF2	9.41058112720437e-111	0.472595	0.764	0.746	2.7686870734348e-106
KIAA1211	3.6676389164781e-09	0.472338	0.308	0.292	0.000107906
RPL8	2.59982646625015e-07	0.472292	0.22	0.198	0.00764895
AGBL1	2.45656797601451e-29	0.47216	0.203	0.144	7.22746864223228e-25
TMEM74B	5.73502391238389e-19	0.471963	0.182	0.136	1.68730138526247e-14
ZNF608	7.94748481745883e-30	0.471715	0.355	0.282	2.33822950814456e-25
JAM2	2.50105402666726e-22	0.47052	0.254	0.198	7.35835105185776e-18
AC004485.1	6.28597409451729e-09	0.470488	0.103	0.079	0.00018494
AC019197.1	2.82268660033834e-32	0.470212	0.365	0.289	8.30462624685544e-28
AC024145.1	1.48210421981421e-08	0.469098	0.111	0.087	0.00043605
AC100818.1	7.00178149127236e-10	0.467281	0.127	0.099	2.05999413254724e-05
MAPK4	1.2610157854427e-73	0.467262	0.679	0.597	3.71003454235095e-69
FAM184B	7.03506733229733e-16	0.466867	0.31	0.262	2.0697871598352e-11
SPATA1	6.29066780055366e-10	0.466464	0.133	0.105	1.85077737360089e-05
MEG9	1.99309610970745e-07	0.466076	0.134	0.113	0.00586389
FKBP14	1.68255004034376e-19	0.465999	0.301	0.252	4.95023047369539e-15
GALNT15	6.53344036286265e-14	0.464957	0.149	0.113	1.92220348915782e-09
AVIL	1.01269262116724e-19	0.464491	0.227	0.177	2.97944296073613e-15
ARNTL2-AS1	2.65372107408461e-07	0.464178	0.128	0.105	0.00780751
AC015712.2	7.0669867270768e-24	0.463888	0.237	0.181	2.07917816497327e-19
C9orf41-AS1	2.10701024334041e-12	0.463578	0.173	0.137	6.19903483693182e-08
CSTF2	4.46393036430978e-14	0.463424	0.16	0.123	1.31333295248358e-09
AHRR	4.63902381640395e-27	0.463355	0.2	0.143	1.3648471970242e-22
AC023590.1	1.61290059809424e-48	0.463295	0.429	0.332	4.74531484965308e-44
TMEM107	1.23410341656284e-12	0.463019	0.146	0.112	3.63085566186955e-08
DPH1	4.55816060909278e-20	0.460757	0.194	0.146	1.34105643280119e-15
AC133919.2	2.22116035877425e-07	0.460475	0.107	0.085	0.00653488
AC010230.1	8.48873219015311e-15	0.459953	0.175	0.136	2.49746989766495e-10
WDR11-AS1	1.25225341523253e-63	0.459436	0.566	0.465	3.68425477295563e-59
PTPRZ1	2.4182293065331e-12	0.458922	0.333	0.301	7.11467244275104e-08
MIR181A2HG	1.5722419799341e-14	0.458877	0.155	0.118	4.62569312916412e-10
EPHA10	3.5862444704864e-38	0.457569	0.436	0.356	1.0551089856618e-33
TTF2	1.3850115741428e-27	0.457551	0.258	0.195	4.07484255228552e-23
CROT	2.90988339491689e-27	0.457197	0.407	0.342	8.56116793618499e-23
AC005037.1	4.17349335207114e-14	0.4571	0.27	0.226	1.22788347911285e-09
CERNA1	8.89954842873569e-11	0.457056	0.137	0.107	2.61833614321833e-06
AC079117.1	4.35452034557681e-10	0.45619	0.221	0.195	1.28114343087215e-05
AC138904.3	4.08068455709612e-35	0.454882	0.379	0.305	1.20057820354325e-30
RASGRP2	5.86750114849455e-13	0.454853	0.124	0.093	1.72627751289858e-08
IL1RL2	1.32518920367104e-27	0.454535	0.214	0.156	3.89883915612056e-23
INPP1	1.72440253687435e-39	0.454224	0.429	0.347	5.07336470373801e-35
CDK20	6.58730529829694e-13	0.453982	0.11	0.081	1.93805109181194e-08
P4HA3	9.5035828213395e-09	0.452624	0.166	0.138	0.000279605
GULP1	1.06655335769288e-62	0.452109	0.586	0.492	3.13790663366821e-58
ASTE1	1.70687301777586e-07	0.451592	0.142	0.12	0.00502179
AL356270.1	2.79853506205134e-23	0.451442	0.21	0.157	8.23357000606124e-19
ZNF473	2.89822269623281e-07	0.451304	0.104	0.083	0.00852686
VWCE	7.35985906143539e-12	0.451245	0.163	0.129	2.16534413446491e-07
THBS3	3.64540475942043e-12	0.450403	0.163	0.129	1.07251453426909e-07
TOM1L1	6.27222718883506e-57	0.449615	0.636	0.567	1.84535196122716e-52
RPL38	4.60117821083518e-15	0.449385	0.197	0.158	1.35371264140982e-10
SPEF1	1.95620697684887e-08	0.448812	0.102	0.079	0.000575536
TMEM177	1.07747382112471e-17	0.447777	0.114	0.079	3.170035729131e-13
TTC21A	2.89851614052943e-25	0.446637	0.387	0.327	8.52772433705164e-21
NBPF1	1.13632950986862e-37	0.446502	0.447	0.365	3.34319505098447e-33
AL031316.1	1.80998582216461e-15	0.446425	0.212	0.169	5.3251592873905e-11
IL6R	9.57756455052078e-09	0.446245	0.124	0.099	0.000281782
LINC01358	2.97789340379134e-15	0.446207	0.196	0.154	8.76126018329452e-11
AC104827.1	2.96056838885851e-45	0.445146	0.49	0.394	8.71028825686063e-41
PTH2R	7.68858789548904e-32	0.445093	0.456	0.411	2.26205944473183e-27
ABCG8	4.29322870865319e-11	0.444725	0.146	0.114	1.26311081837286e-06
AC069133.1	3.11279020572706e-23	0.444526	0.352	0.299	9.15814006426958e-19
GDF7	2.72665785100453e-12	0.444516	0.133	0.101	8.02210006344043e-08
ZRANB2-AS1	1.13602182637665e-08	0.442999	0.145	0.119	0.000334229
PRAG1	4.77710634659865e-43	0.442386	0.503	0.459	1.40547245823279e-38
DNAH2	3.64294975435321e-10	0.442125	0.18	0.149	1.07179224722826e-05
FAAH	1.56422152165386e-19	0.44107	0.316	0.268	4.60209613885783e-15
DEPDC4	3.1295686930897e-07	0.439983	0.1	0.079	0.0092075
AL359706.1	1.1653505649749e-25	0.439933	0.287	0.223	3.42857789721267e-21
SLC22A24	5.70884781571008e-10	0.43963	0.167	0.138	1.67960011586006e-05
SPDYE3	4.41650739863851e-33	0.439327	0.389	0.31	1.29938064175344e-28
SCRG1	1.29576076281909e-10	0.438966	0.167	0.134	3.81225774029003e-06
POLR3G	3.02603967931354e-24	0.438675	0.39	0.329	8.90291134050837e-20
RPS7	8.62852758578874e-27	0.43848	0.271	0.212	2.5385991010149e-22
AL139352.1	8.41749568780809e-24	0.438083	0.329	0.267	2.47651140631002e-19
BDNF-AS	8.09763057958617e-16	0.437959	0.348	0.298	2.38240389282005e-11
ARHGAP25	6.07575205219339e-18	0.437369	0.181	0.137	1.78754701127582e-13
PKNOX2	1.33399020609726e-142	0.43664	0.835	0.829	3.92473258535874e-138
NCAN	2.90632469890784e-43	0.436212	0.412	0.323	8.55069789665676e-39
LSM5	1.05200516613724e-19	0.435914	0.252	0.201	3.09510439929238e-15
AC244517.11	1.89251622003818e-09	0.43576	0.162	0.132	5.56797197097433e-05
AC008014.1	7.97886331344252e-30	0.435172	0.476	0.409	2.34746137544792e-25
HOOK2	9.67041750278257e-46	0.434986	0.555	0.489	2.84513353349366e-41
VSTM2L	1.37286947119309e-23	0.434485	0.382	0.319	4.03911927119718e-19
AC233296.1	1.80403007518497e-07	0.434354	0.234	0.214	0.00530764
COL5A2	4.64245788302479e-26	0.434133	0.406	0.348	1.36585753376472e-21
RPL41	6.16377512658611e-32	0.433566	0.253	0.187	1.8134442799929e-27
RPS12	2.04363000489138e-20	0.432355	0.171	0.125	6.01256383739094e-16
LINC01484	3.85783907533966e-20	0.431582	0.119	0.082	1.13501483435568e-15
AP002370.2	8.25099604359656e-49	0.43143	0.421	0.324	2.42752554598654e-44
SLC12A8	3.08953824683173e-44	0.431254	0.526	0.442	9.08973047600363e-40
LINC00299	1.0606056285944e-14	0.431139	0.31	0.266	3.12040781988759e-10
AL662796.1	2.40564296161205e-36	0.431011	0.487	0.446	7.07764215735883e-32
AC011092.2	4.82595805054227e-09	0.430779	0.189	0.158	0.000141985
HIF1A-AS2	5.38198842984993e-07	0.429859	0.12	0.097	0.0158343
SEMA6A-AS1	1.46894109396485e-07	0.429499	0.148	0.122	0.00432177
COL4A2	1.53243750259264e-49	0.428719	0.371	0.276	4.5085843763778e-45
AC025043.1	6.73725887291144e-17	0.42811	0.259	0.21	1.98216893299927e-12
TFIP11	2.30597920373386e-11	0.42798	0.143	0.111	6.78442141530538e-07
AC024601.1	4.1579018408785e-10	0.427566	0.107	0.081	1.22329630060486e-05
B3GALT5	2.27740232116163e-19	0.427431	0.297	0.247	6.70034536908963e-15
DECR1	2.66847487825041e-26	0.427254	0.458	0.408	7.85091993930053e-22
AP000311.1	5.27737909613019e-27	0.426262	0.395	0.324	1.55265770387246e-22
KLHDC9	1.90566696428939e-08	0.426238	0.106	0.083	0.000560666
ERMAP	1.14993042672841e-08	0.426063	0.127	0.101	0.000338321
KIAA1257	2.23794418137412e-26	0.425955	0.387	0.321	6.58425557602079e-22
SLC1A2	2.22104600280912e-11	0.425814	0.657	0.617	6.53453944486472e-07
AC099788.1	3.02632011145959e-19	0.424118	0.216	0.166	8.90373639992527e-15
MCOLN1	1.75964252913673e-18	0.42364	0.164	0.121	5.17704428497316e-14
DENND6A-AS1	5.22335868619177e-10	0.423472	0.239	0.204	1.53676435906448e-05
AC019118.2	4.10774983274929e-30	0.422267	0.338	0.267	1.20854107829317e-25
GALNT3	2.41740543582997e-17	0.421969	0.21	0.164	7.11224853275536e-13
BDNF	2.49381813243428e-25	0.421774	0.183	0.131	7.33706232743489e-21
NAA38	7.0475599458344e-16	0.421709	0.326	0.283	2.07346261166394e-11
AC018462.1	2.86990347424877e-14	0.421231	0.159	0.122	8.4435430115873e-10
CDC37	2.39737673319656e-24	0.420699	0.45	0.388	7.05332208673761e-20
RAB11A	4.4551391494497e-52	0.42037	0.701	0.643	1.3107464891596e-47
STRC	5.17693224638215e-08	0.42036	0.11	0.087	0.00152311
TESK2	2.17963552604851e-21	0.420131	0.3	0.244	6.41270568118731e-17
CA10	6.92171751531224e-102	0.420123	0.776	0.715	2.03643851018001e-97
DNAAF1	4.42456015015937e-10	0.419096	0.216	0.182	1.30174984177839e-05
THAP2	9.42129630651041e-11	0.418847	0.184	0.15	2.77183958633843e-06
STXBP6	4.00407494181016e-36	0.41864	0.434	0.386	1.17803888862997e-31
AC025159.1	1.35187263346118e-71	0.417842	0.778	0.754	3.97734447490614e-67
LINC01285	3.82346161376093e-09	0.41723	0.127	0.1	0.00011249
CRELD2	2.21206436922259e-07	0.41698	0.122	0.099	0.00650811
GNA14	5.47833512079274e-10	0.416851	0.187	0.154	1.61178097588843e-05
LINC01202	1.42090823891267e-31	0.41627	0.361	0.286	4.18045412970495e-27
LEKR1	1.05645792430624e-07	0.416043	0.103	0.081	0.0031082
C2orf73	4.49899043565777e-09	0.415622	0.107	0.083	0.000132365
TSEN54	1.06082849202177e-14	0.41559	0.23	0.186	3.12106350637726e-10
MYO15A	3.25656386824205e-10	0.415444	0.162	0.13	9.58113655675492e-06
AP003059.2	1.3808343800948e-09	0.414964	0.102	0.078	4.06255282967691e-05
SLC2A4RG	4.42256718476192e-08	0.414955	0.101	0.079	0.00130116
AC138627.1	5.512580064919e-19	0.414677	0.392	0.342	1.62185618089982e-14
GPAM	1.81656757658494e-09	0.413956	0.189	0.157	5.34452346707056e-05
AL080276.2	2.7763666253861e-08	0.413497	0.136	0.11	0.000816835
SYDE2	7.78929209735022e-13	0.412971	0.262	0.226	2.29168762796141e-08
CLK4	4.41076888879665e-41	0.412595	0.59	0.524	1.29769231477286e-36
AL109615.3	1.82874572417432e-14	0.412063	0.151	0.114	5.38035279509327e-10
AL357833.1	5.09668373167635e-09	0.411675	0.107	0.082	0.00014995
DUSP11	8.51529331250138e-20	0.411604	0.342	0.288	2.50528444547103e-15
PGM5	9.94627397646991e-07	0.411426	0.135	0.112	0.0292629
COL14A1	9.57649744272691e-09	0.411399	0.107	0.083	0.00028175
LEPR	7.16690913705917e-40	0.410666	0.468	0.382	2.10857633721418e-35
LINC02112	1.31445177522719e-15	0.410483	0.24	0.194	3.8672485678959e-11
SYNGAP1-AS1	3.74702714461334e-09	0.410469	0.157	0.128	0.000110241
FAM241B	7.95780154041995e-08	0.410076	0.137	0.112	0.00234126
GOLT1B	1.36159054321785e-46	0.409433	0.584	0.523	4.00593553720124e-42
AC097467.3	1.34714935951979e-06	0.409327	0.155	0.133	0.0396345
ADAMTS8	2.42713730109032e-10	0.409011	0.204	0.171	7.14088065353782e-06
AC025580.2	3.16762584073141e-07	0.408734	0.1	0.079	0.00931947
PCYOX1L	2.02179020411805e-12	0.407123	0.2	0.164	5.94830895953572e-08
ZNF302	1.38959346551164e-23	0.407016	0.474	0.429	4.0883229348818e-19
RPL13A	1.62923419770444e-09	0.406919	0.239	0.213	4.79336993306623e-05
ADAT2	1.65367168906287e-14	0.406616	0.198	0.157	4.86526747639186e-10
LRTM1	1.77979765912074e-22	0.40576	0.379	0.315	5.23634269289912e-18
TTC5	3.72421729165168e-30	0.405666	0.484	0.42	1.09570196937684e-25
NOB1	5.72516665072501e-10	0.405644	0.131	0.103	1.68440128030981e-05
AC090579.1	1.092614403146e-48	0.405269	0.542	0.442	3.21458083549586e-44
AMOT	1.40873921294132e-18	0.404541	0.257	0.205	4.14465163839464e-14
CA7	9.03447362794324e-17	0.404191	0.209	0.164	2.65803248607718e-12
MPPE1	1.20029860020497e-27	0.404169	0.429	0.361	3.53139851166303e-23
LINC01310	2.75989120204872e-14	0.403902	0.139	0.105	8.11987590554754e-10
RIN3	7.77923946883444e-12	0.403618	0.187	0.151	2.28873004412578e-07
GAS8	6.27921982610404e-37	0.402622	0.502	0.436	1.84740926503807e-32
CYP2R1	9.753106854656e-15	0.401357	0.231	0.188	2.86946156770834e-10
HS6ST3	1.0171851124658e-96	0.400669	0.923	0.91	2.99266031938563e-92
ZNF618	2.68026898329975e-30	0.400621	0.397	0.323	7.8856193757662e-26
AC058822.1	1.01992788398591e-24	0.400582	0.468	0.399	3.00072982747494e-20
CD276	3.07216084189318e-36	0.400514	0.433	0.353	9.03860441293392e-32
TH2LCRR	8.25983654854676e-09	0.400493	0.179	0.148	0.000243013
GTF2A2	7.83442643655117e-19	0.400469	0.282	0.228	2.30496660189772e-14
AC008780.2	3.66760395766945e-21	0.40033	0.1	0.066	1.07904576038593e-16
AP005328.1	3.7772811514335e-41	0.399505	0.362	0.276	1.11131388756325e-36
ANKZF1	1.38356095761287e-22	0.399478	0.327	0.268	4.07057469339282e-18
RASSF3	8.80167802598882e-08	0.399331	0.158	0.131	0.00258954
DYNLT1	3.7194346699234e-20	0.398839	0.245	0.192	1.09429487423816e-15
MMP25-AS1	1.79220452010222e-10	0.398012	0.151	0.12	5.27284491859273e-06
AC010542.3	3.90569893171784e-16	0.397526	0.225	0.179	1.14909568270071e-11
SLC35C2	1.14908406959375e-17	0.396827	0.273	0.223	3.38072024115178e-13
UNC5B	6.04598236940693e-15	0.396616	0.215	0.172	1.77878847290321e-10
ACTR5	1.03360226206785e-09	0.395942	0.207	0.18	3.04096121522983e-05
CAND2	1.51383699537148e-24	0.395305	0.432	0.371	4.45385982408243e-20
AC025366.1	6.90865300980928e-12	0.395232	0.119	0.089	2.03259480201599e-07
BAALC-AS1	3.30667137733316e-17	0.394777	0.35	0.296	9.72855785925188e-13
CUX2	1.84952853118896e-65	0.394619	0.571	0.463	5.44149789161104e-61
SCNM1	1.65848938583559e-07	0.394491	0.122	0.098	0.00487944
TCTA	2.62247505143652e-09	0.394397	0.185	0.154	7.71558384883138e-05
LINC01135	3.91814162927074e-13	0.394247	0.319	0.275	1.15275644874775e-08
CCDC68	1.49534319448387e-16	0.394075	0.154	0.115	4.39944921249099e-12
NDST3	8.14513511126713e-97	0.393981	0.837	0.785	2.3963802010859e-92
AC062028.1	9.63021162978651e-28	0.393874	0.393	0.325	2.83330456359949e-23
IPO9-AS1	3.72795170310127e-11	0.393313	0.292	0.252	1.09680067056943e-06
MYO5C	1.29090126971641e-35	0.393232	0.525	0.453	3.79796062563266e-31
CLCN5	7.61486746472416e-11	0.392999	0.214	0.178	2.24037015679649e-06
GABRD	2.18781874414034e-22	0.392241	0.326	0.265	6.4367815271353e-18
KCNQ4	2.09176179556224e-26	0.392127	0.161	0.111	6.15417237872366e-22
FLNA	3.74868836852759e-16	0.391967	0.205	0.161	1.1029016049045e-11
RPL23	8.25126699474339e-08	0.391367	0.22	0.196	0.00242761
VILL	5.33589664080555e-09	0.391137	0.109	0.084	0.000156987
RPLP2	1.83323328271251e-15	0.391033	0.253	0.208	5.39355564106847e-11
PPEF1	7.57756612349158e-14	0.390519	0.177	0.139	2.22939572919246e-09
GFRA2	2.20828700276992e-40	0.390368	0.508	0.425	6.49700119084938e-36
ZNF75D	2.40963717247268e-21	0.390117	0.369	0.31	7.08939352513186e-17
PIH1D1	1.25326399561042e-10	0.389848	0.158	0.127	3.68722800148541e-06
CFAP61	1.22230065248801e-21	0.389663	0.405	0.351	3.59613074968499e-17
CCZ1B	1.81620925038209e-16	0.389428	0.329	0.28	5.34346923554913e-12
ABCB1	9.32903403353902e-11	0.389417	0.263	0.224	2.74469510300751e-06
GSAP	3.52981939443062e-20	0.388972	0.384	0.327	1.03850816403543e-15
C1orf131	5.27052775258886e-13	0.388872	0.23	0.19	1.55064197008917e-08
RPS24	8.40798477692877e-18	0.388437	0.413	0.376	2.47371320122021e-13
TRIM54	2.02929735537779e-30	0.38813	0.249	0.184	5.970395749257e-26
DCT	3.11011969555985e-09	0.387847	0.12	0.094	9.15028315630664e-05
RBM4B	4.78219737156479e-11	0.387413	0.311	0.27	1.40697028868808e-06
RNASEH2C	2.90618798691673e-12	0.387284	0.22	0.181	8.5502956763077e-08
LDB3	5.85886555321482e-11	0.386294	0.126	0.097	1.72373683441133e-06
DGKA	7.82138242442248e-15	0.386019	0.309	0.263	2.30112892308934e-10
AC124242.1	2.40290490096238e-08	0.38546	0.101	0.079	0.000706959
HPCAL1	3.31202360706408e-31	0.385341	0.393	0.316	9.74430465434322e-27
STARD4-AS1	1.03542378611036e-14	0.384534	0.348	0.3	3.04632032111529e-10
NUDT9	4.10572955624122e-15	0.384302	0.376	0.332	1.20794669274173e-10
LINC01301	6.70284889163317e-17	0.383958	0.372	0.322	1.9720451724074e-12
MPP7	1.71258350153852e-61	0.383774	0.715	0.667	5.03859191987649e-57
EDRF1	5.60505692387434e-36	0.383225	0.597	0.544	1.64906379757307e-31
RHBDL2	3.03474296180392e-19	0.382654	0.339	0.281	8.92851726792332e-15
TMC2	4.3179687419903e-14	0.382383	0.158	0.122	1.27038958358097e-09
SNHG7	4.93947116235945e-17	0.382297	0.196	0.151	1.45324181067777e-12
SAMD4A	1.30429081255172e-27	0.381997	0.571	0.539	3.83735399960841e-23
SEC23B	1.38811839505599e-20	0.381417	0.355	0.305	4.08398313009422e-16
AL139393.1	2.73798955714071e-24	0.380935	0.414	0.353	8.05543907606369e-20
CTC1	2.32776263453222e-07	0.380907	0.23	0.203	0.00684851
RGS5	3.5804049818088e-14	0.380877	0.15	0.114	1.05339094969797e-09
SLC4A4	4.18017686959656e-23	0.380137	0.497	0.435	1.229849836804e-18
RASL10A	1.12722630283655e-10	0.379747	0.222	0.186	3.31641250557542e-06
PRKCA	9.85001772560297e-102	0.379627	0.848	0.836	2.89797371504965e-97
LINC01001	6.86893774625499e-08	0.379572	0.135	0.11	0.00202091
ATF6B	2.75874259542724e-27	0.379548	0.454	0.388	8.11649659000647e-23
FAM118A	1.87121295456302e-33	0.379245	0.398	0.32	5.50529563361985e-29
MARC1	2.69553662862609e-10	0.378794	0.262	0.224	7.93053831508082e-06
OSGEP	6.97011928900592e-22	0.377258	0.368	0.309	2.05067879601843e-17
AL080250.1	7.3288052479311e-07	0.377019	0.107	0.086	0.0215621
SIRT7	1.15847413254168e-16	0.376734	0.227	0.181	3.40834674535087e-12
TXNRD3	3.75989261843866e-10	0.376246	0.247	0.211	1.10619800727084e-05
SLIRP	7.15674012744297e-15	0.375521	0.325	0.276	2.105584512895e-10
GALNT2	7.4558393980684e-53	0.375313	0.68	0.617	2.1935825093057e-48
TCTEX1D1	1.35614180184553e-16	0.37529	0.187	0.144	3.98990479520975e-12
SCML1	5.56079056642169e-09	0.374941	0.214	0.183	0.000163604
AC004039.1	2.66228146204269e-24	0.372969	0.259	0.2	7.83269828947579e-20
IGSF3	1.9174256539063e-32	0.372964	0.344	0.268	5.64125801635774e-28
AL596451.1	1.36163292989172e-08	0.37294	0.259	0.224	0.000400606
SLC4A3	1.54535163194269e-08	0.37289	0.222	0.192	0.000454658
ABCC8	1.51378213832074e-48	0.372839	0.669	0.61	4.45369842915344e-44
TEX29	2.86035594816519e-09	0.372832	0.155	0.125	8.4154532350968e-05
AC009093.2	2.20806216475058e-13	0.372823	0.211	0.17	6.49633969491268e-09
PTPRD-AS2	8.5110016631717e-11	0.372593	0.101	0.075	2.50402179932175e-06
NAAA	9.21882029172781e-14	0.372539	0.351	0.308	2.71226911802924e-09
AC104365.1	1.34103895582024e-11	0.372531	0.142	0.111	3.94547071191872e-07
A1BG-AS1	4.26006531430574e-10	0.372445	0.196	0.162	1.25335381612189e-05
SPATA20	2.95333831422898e-07	0.371549	0.177	0.153	0.00868902
BRD9	2.12853429778996e-20	0.371535	0.43	0.374	6.26236075752784e-16
WDR54	3.27864784559028e-13	0.371314	0.111	0.081	9.64610982651117e-09
GSTT2B	6.81616242703931e-16	0.371001	0.177	0.136	2.00538314765923e-11
ECI2	3.27078309039044e-09	0.370846	0.221	0.188	9.62297093023772e-05
CCDC34	3.35730348268027e-15	0.370761	0.388	0.344	9.87752257639364e-11
SUSD5	2.57924991218346e-17	0.370688	0.281	0.231	7.58841116663495e-13
EPHX4	1.52596677362088e-42	0.37027	0.643	0.598	4.48954684467e-38
HHLA3	1.20924839938546e-07	0.369768	0.141	0.115	0.00355773
LRRN1	7.62836180638998e-42	0.369585	0.62	0.55	2.244340327058e-37
CCDC32	1.60048087452076e-24	0.368561	0.404	0.339	4.70877478092754e-20
MTHFD1	9.20056471407177e-22	0.368211	0.468	0.423	2.70689814452706e-17
GCFC2	1.27192312836787e-38	0.3673	0.662	0.617	3.74212503597112e-34
XIST	2.61893385468879e-103	0.366406	0.756	0.71	7.7051652938799e-99
SMIM17	8.62159762129739e-14	0.366221	0.292	0.249	2.5365602361619e-09
AP001528.2	1.04788822060488e-27	0.366015	0.462	0.393	3.08299193384163e-23
APEX1	5.62553223866336e-09	0.3656	0.194	0.163	0.000165509
AL359265.3	8.11687604390095e-09	0.365545	0.15	0.121	0.000238807
EID2B	1.46653173522369e-11	0.365053	0.199	0.162	4.31468301820162e-07
SPATC1L	3.75976690336861e-11	0.364822	0.155	0.123	1.10616102064008e-06
JAKMIP2-AS1	1.06104571564589e-17	0.364807	0.348	0.293	3.12170260000178e-13
PMM1	9.27826187980811e-15	0.364649	0.158	0.121	2.72975742765835e-10
ANGPT2	4.72344158977534e-09	0.364119	0.208	0.175	0.000138968
RGP1	1.82854923884949e-22	0.364074	0.287	0.227	5.37977471561909e-18
IL7	8.06482555557223e-17	0.36371	0.27	0.22	2.3727523267049e-12
FGD6	2.17176100688467e-15	0.363573	0.377	0.333	6.38953805835539e-11
CCDC173	1.55400918150117e-07	0.363447	0.125	0.101	0.00457205
LRIF1	1.4792581452022e-16	0.36311	0.332	0.282	4.35212538899939e-12
KIF20B	2.21288825788514e-08	0.362483	0.193	0.162	0.000651054
MAK	2.64376403650876e-29	0.362392	0.467	0.391	7.77821817181242e-25
TMEM132E	9.01887968360549e-13	0.362331	0.177	0.14	2.65344459171357e-08
SCIMP	8.81766297820571e-07	0.362159	0.182	0.156	0.0259424
RHOJ	8.23445940215808e-12	0.362014	0.129	0.102	2.42266030070893e-07
SERPINI2	5.15099005104541e-13	0.362007	0.107	0.077	1.51547278291807e-08
RASGRF1	1.97886494908473e-58	0.361724	0.706	0.613	5.82201856670217e-54
MAPKAPK5-AS1	7.55486524819955e-19	0.360999	0.134	0.095	2.22271690467279e-14
SUGCT	6.66041989282046e-14	0.360669	0.331	0.284	1.95956213666671e-09
IL12A-AS1	3.30916996962604e-24	0.360431	0.518	0.463	9.73590896763676e-20
LINC02217	3.49922082985364e-37	0.3604	0.602	0.549	1.02950576035124e-32
SNHG21	1.02804368266574e-06	0.36038	0.148	0.125	0.0302461
LGI4	8.46434694426281e-38	0.359858	0.559	0.491	2.49029551447156e-33
AC008708.2	3.77682763746111e-08	0.359797	0.111	0.088	0.00111118
TSIX	3.77404341642153e-12	0.35962	0.176	0.14	1.11036131354538e-07
MESD	9.3985741235624e-10	0.359293	0.29	0.254	2.76515449289329e-05
RORA-AS1	2.16436563273427e-08	0.359234	0.273	0.238	0.000636778
AP4B1	9.89922419098138e-14	0.359144	0.254	0.211	2.91245074922863e-09
ZNF684	1.09202430174328e-07	0.358924	0.125	0.101	0.00321284
PRKD3	6.52091346749341e-10	0.35854	0.191	0.157	1.91851795127123e-05
RHOT2	1.79530532734954e-29	0.357509	0.394	0.322	5.2819678035951e-25
APTX	3.60576409650273e-27	0.357215	0.539	0.487	1.06085185483207e-22
ZFHX4	5.65188862048458e-07	0.357095	0.157	0.132	0.0166284
TRAF6	1.38572831059258e-23	0.356476	0.481	0.426	4.07695126259442e-19
PDE1B	1.62263131224329e-27	0.355607	0.412	0.344	4.77394358375098e-23
ARL6	8.50819866172264e-37	0.3553	0.62	0.567	2.50319712826542e-32
DNTTIP1	1.85976140458161e-15	0.355135	0.227	0.182	5.47160402841955e-11
AC103974.1	1.53347133822096e-06	0.355121	0.18	0.155	0.0451163
ACTR1B	1.57022602252113e-17	0.355099	0.436	0.385	4.6197619808594e-13
STAT6	1.03334473804553e-13	0.354704	0.24	0.197	3.04020355380377e-09
LINC00621	1.01750575473543e-06	0.354587	0.114	0.092	0.029936
SDHAF3	1.97311791636077e-17	0.354543	0.26	0.209	5.80511022172501e-13
AC096576.2	7.92604256654061e-36	0.354523	0.359	0.281	2.33192098350191e-31
SHROOM3	4.57629432801249e-32	0.353917	0.594	0.524	1.34639155424455e-27
CYB5R1	1.48148837915622e-06	0.353481	0.139	0.116	0.0435869
AP001831.1	2.07830656896968e-20	0.353236	0.398	0.336	6.11458575656569e-16
ZNF423	4.31229033855343e-13	0.352285	0.202	0.162	1.26871894050581e-08
AC092745.1	1.04477496696134e-10	0.351612	0.191	0.157	3.07383243029697e-06
KCNMA1-AS1	1.02717526140897e-15	0.351416	0.268	0.22	3.02205233659134e-11
HIF1AN	8.33760912075801e-13	0.351301	0.331	0.288	2.45300797941821e-08
THUMPD3-AS1	3.08316341564477e-44	0.350905	0.627	0.568	9.07097508516847e-40
DNAAF4	3.34803256014846e-29	0.350408	0.531	0.458	9.85024659521279e-25
ZP3	9.78793305018963e-09	0.350373	0.113	0.089	0.000287971
NME4	1.1136475915954e-12	0.350181	0.187	0.151	3.27646257923284e-08
TCTN3	4.50152274492538e-12	0.35016	0.302	0.261	1.3243930067845e-07
UFL1-AS1	9.26993603625934e-08	0.350116	0.208	0.177	0.00272731
ACADM	1.85212078699883e-44	0.350039	0.663	0.614	5.44912456742927e-40
NPHP3-AS1	1.42052991586867e-06	0.34997	0.105	0.085	0.0417934
POLL	1.05044435249125e-16	0.349807	0.243	0.195	3.09051232946451e-12
COQ8B	2.52898851924325e-09	0.349503	0.207	0.174	7.44053712246557e-05
LINC01811	1.2850055365544e-18	0.349429	0.502	0.473	3.7806147890967e-14
OTULIN	1.64928516376604e-13	0.349139	0.302	0.256	4.85236188031606e-09
AC145207.1	1.38206568352641e-07	0.348965	0.116	0.093	0.00406618
AL589740.1	9.30938962845097e-35	0.34892	0.577	0.494	2.73891552258656e-30
GPR61	6.44207938874595e-12	0.348819	0.189	0.153	1.89532417696295e-07
CAD	5.61151670048618e-10	0.348585	0.17	0.138	1.65096432845004e-05
MEG3	5.34892958150048e-63	0.348277	0.729	0.722	1.57370857217326e-58
FAM95B1	8.97190621776994e-32	0.34816	0.361	0.285	2.63962452833009e-27
CEP83	7.96392302881159e-37	0.348086	0.63	0.576	2.34306579430666e-32
POLQ	7.58300404009599e-13	0.347712	0.204	0.165	2.23099561863664e-08
RPL30	6.43653840085943e-07	0.347622	0.332	0.302	0.0189369
AL133410.1	2.6724333344988e-14	0.347339	0.331	0.284	7.86256611342891e-10
AC027801.1	5.16757721236585e-11	0.347163	0.109	0.082	1.52035289165016e-06
KCNS2	1.75577457050671e-09	0.346889	0.175	0.144	5.1656643638878e-05
NENF	6.73590753992654e-11	0.346842	0.195	0.159	1.98177135732179e-06
PPIL3	1.4929684770865e-09	0.346751	0.27	0.235	4.39246255643619e-05
NOC3L	1.41368041387944e-06	0.346597	0.194	0.17	0.0415919
GLIS3	2.28729285531449e-16	0.346505	0.382	0.329	6.72944430962077e-12
TUBG2	4.8128905617377e-20	0.346258	0.421	0.367	1.41600053216885e-15
NRG4	1.04736701373485e-17	0.346026	0.465	0.416	3.08145849110931e-13
EPHA6	2.00138338828668e-121	0.345741	0.713	0.574	5.88827006667823e-117
MFSD13A	3.11258069584746e-11	0.345574	0.261	0.221	9.15752366525282e-07
GBA	9.47979025906026e-07	0.345153	0.228	0.205	0.0278905
ANKUB1	1.38226805334881e-25	0.345087	0.424	0.354	4.06677083975755e-21
AC130650.1	3.8943590025398e-11	0.34506	0.279	0.238	1.14575936213723e-06
FGFR2	7.66535525476899e-22	0.344723	0.26	0.205	2.25522416950558e-17
AL583859.2	1.47717294876644e-16	0.344235	0.253	0.205	4.34599053256574e-12
SCPEP1	1.28228803480063e-29	0.343946	0.524	0.473	3.77261962718694e-25
FTH1	3.84744223413676e-38	0.343597	0.691	0.65	1.13195597970538e-33
CRYBG3	1.18708085507515e-21	0.34359	0.351	0.289	3.4925105837166e-17
MED10	4.86758110116428e-16	0.343387	0.336	0.288	1.43209103577354e-11
FAM200A	1.2285093681798e-06	0.342595	0.224	0.196	0.036144
LRIG1	1.16152565928102e-09	0.342576	0.3	0.264	3.41732464217069e-05
LOXL2	5.61863103082581e-10	0.341838	0.175	0.143	1.65305743557926e-05
TESPA1	4.84804131182362e-47	0.340936	0.661	0.612	1.42634223435163e-42
NLRX1	7.51139846740499e-07	0.340324	0.142	0.117	0.0220993
SNRPC	1.21177023515001e-06	0.340138	0.172	0.146	0.0356515
AC093879.1	1.66862212533994e-31	0.339933	0.402	0.326	4.90925315496265e-27
UNC45A	6.50050875946948e-12	0.339774	0.326	0.285	1.91251468212352e-07
AC006504.5	4.05517898967074e-69	0.339732	0.757	0.736	1.19307421055103e-64
COL26A1	1.37361126578248e-61	0.339531	0.758	0.717	4.04130170505864e-57
RHOBTB2	3.34217805080113e-31	0.339272	0.569	0.505	9.83302204326199e-27
TXNRD3NB	1.99751269229971e-11	0.339011	0.313	0.27	5.87688209201497e-07
SERHL2	3.12574437291767e-07	0.338812	0.195	0.167	0.00919625
ARHGEF2	1.69604157380409e-17	0.338308	0.465	0.412	4.98992391428902e-13
NOXA1	4.75785669343778e-20	0.337945	0.407	0.353	1.39980901777633e-15
AKR1E2	5.11444895374181e-11	0.337405	0.217	0.181	1.50472202668038e-06
DPYS	1.06953986457598e-16	0.337171	0.292	0.242	3.14669323556899e-12
RBMX2	8.91817140390847e-13	0.337109	0.202	0.163	2.62381520874391e-08
AGRN	4.7435077197562e-24	0.336873	0.293	0.232	1.39558740622947e-19
HAT1	7.67970233265417e-08	0.33673	0.415	0.382	0.00225945
LAMP5	3.18529722367004e-10	0.336052	0.174	0.142	9.37146296175964e-06
LINC01535	3.99746366829946e-14	0.33549	0.201	0.16	1.17609378585038e-09
NTNG1	6.0392360149602e-17	0.334811	0.391	0.362	1.77680362796144e-12
NOL3	1.18074937582772e-06	0.334739	0.114	0.092	0.0347388
AC131571.1	2.32354968926236e-10	0.334471	0.162	0.131	6.83611554077879e-06
AC097534.2	8.94075169560187e-09	0.333548	0.201	0.169	0.000263046
CCDC12	4.04197488219298e-11	0.333396	0.318	0.278	1.18918943009e-06
STEAP1B	3.95669714855185e-10	0.332939	0.284	0.251	1.16409986807544e-05
PLCH2	1.19938125457142e-24	0.332646	0.205	0.152	3.52869958907457e-20
AC097515.1	3.25729357433214e-12	0.332567	0.261	0.219	9.58328342504258e-08
BBS4	1.76197464790304e-10	0.332522	0.328	0.29	5.18390561159554e-06
PSMA3	1.55545494478453e-09	0.332389	0.394	0.36	4.57630399305057e-05
PILRB	1.14053430183427e-30	0.332097	0.555	0.483	3.35556596942659e-26
AC004053.1	8.525862510928e-07	0.332044	0.124	0.101	0.0250839
TBCCD1	4.86441482328793e-07	0.331916	0.157	0.131	0.0143116
TPCN2	6.23490107100532e-31	0.331358	0.559	0.51	1.83437024410048e-26
STYK1	1.68258506433875e-16	0.331235	0.419	0.376	4.95033351779103e-12
C1RL	6.60474557484285e-21	0.331234	0.208	0.158	1.94318219557451e-16
HSPA14.1	9.05279793096545e-11	0.331225	0.296	0.257	2.66342367926934e-06
PNPLA2	9.51308792410695e-10	0.331113	0.174	0.143	2.79884559815151e-05
PNKP	1.00117149934718e-06	0.330905	0.161	0.136	0.0294555
TOX4	1.25001953755879e-10	0.330736	0.371	0.335	3.67768248145171e-06
LINC02231	1.27673745961096e-07	0.330587	0.163	0.136	0.00375629
PIP5K1B	5.549679649264e-23	0.330587	0.571	0.513	1.63277124960996e-18
CKMT2-AS1	1.02951277194171e-31	0.330578	0.638	0.585	3.02892952632971e-27
GRB14	1.967883093599e-27	0.330296	0.341	0.272	5.78970884967762e-23
LINC02359	1.79629606090785e-13	0.33008	0.163	0.127	5.284882640797e-09
RBKS	7.43587676212624e-11	0.32967	0.314	0.273	2.18770930218516e-06
SLC26A4	1.93362704601346e-19	0.328595	0.503	0.455	5.68892413207621e-15
ZNF19	3.50793565996282e-09	0.32854	0.138	0.111	0.000103207
BPHL	2.19774848684031e-08	0.328334	0.294	0.263	0.0006466
AC060765.1	6.32020809495978e-12	0.32807	0.257	0.218	1.85946842361812e-07
AL591885.1	1.33605661413975e-16	0.327672	0.332	0.279	3.93081216446056e-12
CCNYL1	2.60617530958188e-26	0.327661	0.551	0.496	7.66762837832084e-22
BOLA3	4.07809343592347e-10	0.327518	0.236	0.2	1.19981586978304e-05
ZNF589	1.04059918389324e-25	0.3275	0.518	0.455	3.06154685893229e-21
TSPOAP1-AS1	6.2927537979259e-07	0.327378	0.18	0.153	0.0185139
AC060809.1	7.75252375315214e-08	0.326988	0.145	0.118	0.00228087
TRPS1	2.39227320114819e-36	0.326964	0.711	0.658	7.03830698509809e-32
DCDC1	3.12034811341558e-18	0.326794	0.427	0.375	9.18037618447999e-14
PARD6G	1.07203176760877e-06	0.326603	0.162	0.137	0.0315402
SEMA3C	4.96990559667698e-15	0.326536	0.344	0.297	1.46219592559834e-10
ACP1	7.52211234956283e-13	0.326357	0.308	0.264	2.21308067436488e-08
AZIN2	2.73594966667362e-24	0.326111	0.516	0.453	8.04943751432047e-20
C2orf80	5.48694401293929e-14	0.326049	0.413	0.371	1.61431379804687e-09
TAGLN	6.53386323291077e-18	0.3258	0.12	0.083	1.92232790175468e-13
SDK1	1.42931895546655e-22	0.325706	0.623	0.581	4.20519929887815e-18
CHCHD6	2.78051438726218e-58	0.325255	0.756	0.736	8.18055137876405e-54
ALG11	4.81678378970164e-08	0.324994	0.216	0.186	0.00141715
LDB1	2.29913985847174e-15	0.32455	0.311	0.261	6.7642993776097e-11
VLDLR-AS1	1.09701276877598e-25	0.324472	0.568	0.505	3.22752126701581e-21
ING4	1.43111180068928e-18	0.324393	0.381	0.324	4.21047402880792e-14
ZCCHC9	1.38310812108109e-09	0.323995	0.274	0.238	4.06924240303266e-05
CDHR2	1.43654545423585e-06	0.323947	0.144	0.12	0.0422646
DCDC2	7.32878195046613e-12	0.323944	0.266	0.225	2.15620093764664e-07
POLE	2.17561626399595e-11	0.32344	0.298	0.257	6.40088061030248e-07
LDLRAD3	8.8595906060188e-20	0.32344	0.52	0.462	2.60658015219679e-15
DNAH7	2.22667037377502e-43	0.323257	0.726	0.688	6.55108690668349e-39
WDR12	6.0188450528189e-15	0.323121	0.449	0.406	1.77080440298985e-10
PEBP4	7.56655171279874e-12	0.323036	0.254	0.213	2.22615517942252e-07
DDX25	5.2564609238345e-16	0.322968	0.433	0.381	1.54650336840135e-11
C12orf29	4.38620154865111e-14	0.322763	0.319	0.273	1.29046435762864e-09
KLHDC4	8.71869648072538e-13	0.322699	0.358	0.315	2.56512769159421e-08
USE1	3.54242657815804e-07	0.322508	0.11	0.088	0.0104222
RYR1	3.69064532800873e-18	0.322027	0.328	0.273	1.08582476195345e-13
ATP5ME	1.32327425944121e-06	0.322022	0.189	0.163	0.0389321
HDAC9	3.11594374281739e-84	0.321949	0.894	0.883	9.16741808574305e-80
RECQL	3.80645737212676e-07	0.321821	0.255	0.228	0.011199
ACAA1	4.43541061978375e-16	0.321733	0.31	0.26	1.30494215844658e-11
AC005972.4	4.41334612567593e-09	0.321535	0.199	0.166	0.000129845
KREMEN1	1.00186514083046e-06	0.321267	0.215	0.187	0.0294759
PRKAG1	9.08338272579381e-09	0.321109	0.333	0.301	0.000267242
SNCAIP	9.18828999659703e-07	0.321067	0.211	0.184	0.0270329
RPS14	4.23367354659357e-10	0.320989	0.272	0.236	1.24558909414329e-05
LINC01376	1.24342408113218e-12	0.320873	0.346	0.3	3.658277989099e-08
AC092902.3	3.4204619291378e-28	0.320675	0.554	0.495	1.00633410417163e-23
AC010636.2	2.70710064363414e-07	0.320497	0.2	0.171	0.00796456
CHST9	3.83143441096896e-20	0.319786	0.236	0.189	1.12724631805118e-15
STK3	2.3662686772394e-14	0.319557	0.502	0.46	6.96179907530603e-10
AL138828.1	4.84495843442295e-13	0.319094	0.164	0.128	1.42543522099157e-08
MOV10L1	1.41525570988089e-09	0.318867	0.165	0.134	4.16382382404057e-05
ARHGEF26	5.01611567478641e-07	0.318818	0.14	0.116	0.0147579
CDKL2	1.40300837986316e-18	0.318738	0.517	0.464	4.1277909543954e-14
RIC3	8.72280232724192e-44	0.318346	0.71	0.679	2.56633567269785e-39
ITGB1BP1	1.07948852029426e-34	0.318278	0.644	0.594	3.17596317555774e-30
AC011287.1	1.521105457083e-44	0.318198	0.782	0.746	4.47524436528389e-40
CFAP161	9.68541555472854e-17	0.317847	0.481	0.432	2.84954611035668e-12
CNGB1	1.82303368366408e-20	0.317092	0.247	0.195	5.36354740070809e-16
AL512625.3	9.11727217824094e-07	0.316981	0.256	0.226	0.0268239
SERPINE2	1.01550590585843e-12	0.316927	0.403	0.368	2.98771992562608e-08
MTIF3	1.62407851178322e-13	0.316907	0.412	0.369	4.7782013895174e-09
RFX4	4.26295228227932e-10	0.316869	0.211	0.176	1.2542031909694e-05
TIMP3	1.69084276318768e-25	0.316688	0.365	0.297	4.97462849357446e-21
MLLT6	1.30456331195726e-23	0.316383	0.513	0.452	3.83815572010945e-19
JAZF1-AS1	1.54665196226179e-22	0.315668	0.495	0.434	4.55040473817042e-18
EMC2	2.40854577105092e-11	0.315647	0.468	0.431	7.08618251300892e-07
MRPS5	4.33518711791736e-38	0.315594	0.678	0.64	1.27545540196247e-33
GTPBP10	3.48001901615764e-12	0.31553	0.382	0.34	1.02385639474374e-07
TRAF5	4.92202315317951e-08	0.315419	0.266	0.233	0.00144811
AC138305.1	8.24402315014191e-12	0.315392	0.227	0.191	2.42547405100325e-07
NDUFAF8	3.86698038860121e-08	0.315158	0.16	0.132	0.0011377
TPST2	4.03676007485119e-16	0.315004	0.437	0.39	1.18765518162197e-11
SLC12A1	2.67389681278054e-09	0.314752	0.161	0.132	7.86687181288163e-05
RPL29	1.6382498558535e-08	0.314444	0.275	0.241	0.000481989
CDH22	4.76396997509235e-33	0.31434	0.67	0.631	1.40160760637192e-28
RPS6	1.03618416389643e-11	0.314243	0.237	0.199	3.04855742859967e-07
DRP2	1.11974732454976e-26	0.314174	0.568	0.517	3.29440860355785e-22
FAM227B	1.37938473737387e-09	0.314146	0.28	0.242	4.05828783582766e-05
TRPC5	3.44424647083784e-40	0.313618	0.541	0.45	1.0133317541852e-35
PTRH2	4.30585850193507e-13	0.313055	0.307	0.263	1.26682662985432e-08
PHYH	2.45856248805248e-07	0.313031	0.15	0.125	0.00723334
DSN1	3.07736345655336e-08	0.312999	0.16	0.132	0.000905391
GPR161	2.95209402078829e-08	0.312753	0.208	0.178	0.000868536
PTPN20	1.55575308387635e-16	0.31263	0.468	0.415	4.5771811480726e-12
AL450384.2	1.54713123422781e-10	0.312131	0.472	0.439	4.55181480422164e-06
CHST15	5.54553414738397e-29	0.312095	0.67	0.625	1.63155160150184e-24
SORCS2	3.46986664183221e-19	0.311768	0.513	0.457	1.02086946469345e-14
RNF123	1.04377326275958e-12	0.311385	0.346	0.303	3.07088531636497e-08
DMAP1	2.66257852783812e-11	0.311276	0.243	0.213	7.83357228675255e-07
SRSF5	1.37653455270554e-71	0.310931	0.774	0.738	4.04990230751498e-67
AC091885.2	9.35805378544184e-35	0.310673	0.364	0.29	2.75323300421484e-30
ANKRD7	4.99738816242041e-16	0.310442	0.577	0.538	1.47028157126571e-11
TPTEP2-CSNK1E	3.53660472879761e-33	0.309769	0.652	0.6	1.04050447725954e-28
LRP2BP	2.22556555763453e-18	0.309441	0.505	0.456	6.54783642711656e-14
PYGL	2.34669810184652e-14	0.309427	0.195	0.155	6.90422048544266e-10
NDUFA12	1.0754951762291e-06	0.309361	0.267	0.239	0.0316421
B4GALT4	1.05557480509978e-07	0.30916	0.269	0.238	0.00310561
EIF3E	7.07580202873776e-18	0.308955	0.59	0.545	2.08177171487494e-13
ART3	2.78105488722781e-16	0.30891	0.397	0.349	8.18214158371294e-12
TFB1M	2.84307734944052e-15	0.308738	0.49	0.445	8.36461786978894e-11
CPSF4	1.26645167522544e-07	0.308614	0.195	0.166	0.00372603
ADGRV1	4.72083062217231e-08	0.308293	0.653	0.641	0.00138892
FN3K	3.51479041538274e-15	0.308261	0.244	0.199	1.03408648810976e-10
C3orf70	3.01158404668744e-16	0.307769	0.364	0.31	8.86038142375912e-12
PFDN1	6.59579861818334e-14	0.307546	0.395	0.349	1.94054991145572e-09
CHCHD7	8.28290605997499e-11	0.307534	0.136	0.106	2.43691379190524e-06
SLC1A1	2.51309512118529e-24	0.307301	0.622	0.591	7.39377715603924e-20
AC103706.1	3.21941296134039e-14	0.307253	0.105	0.075	9.47183487355955e-10
GAA	6.09146311377125e-18	0.307039	0.283	0.231	1.79216936270264e-13
MYLIP	6.68105130908036e-11	0.30698	0.252	0.213	1.96563210564453e-06
ANKRD20A4	7.95788891626091e-18	0.306907	0.209	0.163	2.34129049805312e-13
DHRS4L2	1.17331136096629e-14	0.306158	0.259	0.213	3.45199935509891e-10
PLAG1	6.68262494080925e-11	0.305893	0.3	0.261	1.96609508383549e-06
CFAP43	1.39895653857872e-08	0.305812	0.342	0.31	0.000411587
AC008610.1	5.57298365841816e-12	0.305686	0.134	0.104	1.63962752214321e-07
USP43	3.10903717660898e-23	0.305443	0.567	0.535	9.14709827730127e-19
DPYSL3	8.87719646973376e-12	0.305353	0.326	0.282	2.61175997336037e-07
TLDC1	1.01619934367242e-08	0.305348	0.31	0.275	0.000298976
MFSD4B	6.93339613416656e-12	0.305277	0.279	0.237	2.03987447663314e-07
ARL15	9.14863812346689e-138	0.305249	0.925	0.937	2.69162082230519e-133
CHST8	8.08874523740081e-10	0.304856	0.203	0.169	2.37978973629569e-05
ADRB1	1.00497938394163e-14	0.304665	0.223	0.18	2.95674984549467e-10
COMMD9	1.94212467830388e-08	0.304139	0.203	0.172	0.000571393
LINC00894	1.4452359224056e-30	0.304005	0.691	0.664	4.25202860730952e-26
FGGY	1.96168898157906e-10	0.303779	0.455	0.419	5.77148515270375e-06
CUTC	9.81259115890239e-09	0.303622	0.297	0.267	0.000288696
SLC37A1	9.72116963162479e-21	0.30325	0.499	0.443	2.86006531732033e-16
IPO5	1.10700503927631e-23	0.303241	0.649	0.628	3.25691952605484e-19
DIAPH2	3.0673858589331e-57	0.302997	0.851	0.826	9.02455593556707e-53
MOB3B	5.55923782590356e-27	0.30293	0.638	0.598	1.63558336075909e-22
FAM85B	1.21439108008758e-140	0.302665	0.862	0.877	3.57285999672567e-136
TRERF1	7.43949499388011e-61	0.302655	0.79	0.775	2.18877382214947e-56
ANXA11	8.18476999409086e-27	0.302617	0.636	0.597	2.40804117996147e-22
ADAL	9.70034754034798e-12	0.302342	0.335	0.291	2.85393924984578e-07
HINFP	9.71320451196367e-11	0.302285	0.27	0.231	2.85772189946483e-06
ORC6	3.25439094507291e-14	0.302048	0.142	0.108	9.57474359949902e-10
AC068205.1	4.58044098493804e-07	0.301777	0.24	0.21	0.0134761
SYNE2	1.80022621446184e-08	0.301339	0.255	0.221	0.000529645
DTNBP1	3.63216509445674e-23	0.301241	0.529	0.466	1.06861929244012e-18
XKR9	4.39115619811483e-17	0.301019	0.472	0.417	1.29192206504736e-12
AL160290.2	5.42367174988081e-13	0.301017	0.216	0.176	1.59569846553243e-08
GEMIN8	2.64860610747702e-09	0.300817	0.257	0.221	7.79246402880813e-05
ZNF83	2.99097857829498e-20	0.300494	0.522	0.464	8.79975807520167e-16
CFAP74	4.94797679001752e-16	0.299922	0.328	0.276	1.45574425139105e-11
WDR61	3.91272056566601e-20	0.299761	0.504	0.455	1.1511615176246e-15
BOC	1.06442795239085e-07	0.29914	0.236	0.205	0.00313165
ZNF428	6.92718721498606e-10	0.299027	0.218	0.184	2.03804775052105e-05
DELE1	7.30927868554762e-16	0.298772	0.516	0.476	2.15046288207497e-11
SMIM19	1.55231382617258e-10	0.298556	0.268	0.228	4.56706250798236e-06
C15orf53	2.22219333874845e-07	0.298164	0.108	0.086	0.00653792
AC093151.3	1.27335934255374e-07	0.297625	0.135	0.11	0.00374635
TNXB	5.06378437396539e-11	0.297454	0.334	0.293	1.48981600066436e-06
MFHAS1	3.44605368993454e-23	0.296522	0.621	0.573	1.01386345611564e-18
CYP4F26P	6.27709724761185e-10	0.296333	0.234	0.197	1.84678478121988e-05
HUNK	2.00042984385395e-20	0.296166	0.476	0.414	5.8854646436027e-16
RCC2	2.37663183247444e-13	0.295885	0.331	0.284	6.99228851432305e-09
ZNF540	1.14972354391105e-17	0.295597	0.575	0.545	3.3826016385407e-13
NPDC1	8.21162219139183e-10	0.295587	0.159	0.129	2.41594136492939e-05
AC021752.1	1.64487605956955e-10	0.295515	0.293	0.252	4.83938985485957e-06
PUS7L	1.15626437463281e-28	0.295448	0.704	0.677	3.40184541660718e-24
KLF8	5.37435974691388e-12	0.29534	0.246	0.205	1.58119038113953e-07
PHYKPL	9.92936781131631e-16	0.294132	0.436	0.385	2.92131930376737e-11
SLC29A1	6.18736304778582e-10	0.294126	0.218	0.183	1.82038408228907e-05
NSUN3	2.06686959316382e-10	0.294059	0.389	0.351	6.08093703004728e-06
FBXL13	2.78577462493411e-12	0.293961	0.51	0.467	8.19602752401864e-08
WDSUB1	4.79258625090598e-23	0.293955	0.609	0.567	1.41002680087905e-18
ANAPC4	1.86705951713904e-16	0.293845	0.542	0.502	5.49307580537477e-12
TPD52	4.46205077197998e-26	0.293173	0.662	0.626	1.31277995762423e-21
GCNT4	1.0482361323135e-08	0.293029	0.164	0.136	0.000308402
AC005237.1	5.40705217297487e-13	0.292877	0.221	0.181	1.59080881981094e-08
SUCLG2-AS1	3.61640762521005e-14	0.292704	0.283	0.236	1.06398328741305e-09
DHRS7B	1.56810828153245e-26	0.292685	0.498	0.426	4.61353137509662e-22
ADAM17	4.81748515642957e-26	0.292549	0.689	0.658	1.41735230787314e-21
PHACTR3	1.9174475452509e-88	0.292457	0.852	0.851	5.64132242288267e-84
METTL8	1.4328827547978e-14	0.292378	0.453	0.406	4.21568435289061e-10
TRIM66	2.82304756370096e-12	0.292216	0.3	0.256	8.3056882371646e-08
SUPV3L1	3.7619609365232e-18	0.292121	0.54	0.486	1.10680652713449e-13
ENTPD1-AS1	5.7201120146549e-22	0.292016	0.654	0.612	1.68291415583162e-17
TTLL11	2.93936529882754e-130	0.292013	0.851	0.872	8.6479066456805e-126
FAM66D	2.29892720966713e-125	0.291889	0.848	0.863	6.76367374356165e-121
KCNG3	1.25482792867859e-10	0.291744	0.325	0.284	3.69182924896529e-06
MED8	1.17137375525219e-21	0.291031	0.184	0.135	3.44629872532747e-17
IMMP2L	4.15644527583053e-109	0.291007	0.923	0.934	1.2228677646021e-104
OSTF1	9.69606918359146e-13	0.290891	0.484	0.438	2.85268051450444e-08
CCS	1.73886613911959e-18	0.290488	0.284	0.231	5.11591806790374e-14
MOXD1	3.22024779441885e-14	0.290333	0.378	0.354	9.4742910359597e-10
CSNKA2IP	1.78420622442007e-11	0.290004	0.233	0.195	5.24931313286629e-07
ZNF454	3.35134753160302e-07	0.289813	0.18	0.152	0.00986
NME9	4.26218843172353e-22	0.289727	0.573	0.525	1.25397845849738e-17
FBF1	1.47541325289584e-09	0.289496	0.182	0.15	4.34081333134485e-05
AC022387.1	1.45327394975433e-07	0.289464	0.115	0.092	0.00427568
RAVER2	5.61603994543096e-14	0.28934	0.53	0.493	1.65229511234524e-09
SERPINB9	3.03493824538358e-09	0.288366	0.279	0.242	8.92909181174304e-05
SYT17	5.61460606066745e-13	0.288178	0.403	0.358	1.65187324910897e-08
ZDHHC23	5.78341342285541e-11	0.28739	0.397	0.354	1.70153806313829e-06
AC007563.2	5.24362222987947e-50	0.28738	0.74	0.748	1.54272609625284e-45
GRM7-AS3	3.89018697866995e-08	0.287214	0.108	0.086	0.00114453
TMEM65	4.16585762054064e-32	0.287199	0.707	0.674	1.22563697053926e-27
OSBPL3	1.61477094801149e-35	0.286676	0.681	0.607	4.75081760614459e-31
FOXRED1	3.5427226478941e-15	0.286464	0.392	0.341	1.04230443023692e-10
CD8A	1.28197112849352e-09	0.285896	0.118	0.092	3.77168725714077e-05
AC018816.1	2.14663876470541e-09	0.285724	0.373	0.333	6.31562590963978e-05
PALD1	4.03403720948939e-07	0.285611	0.156	0.131	0.0118685
AIMP1	5.12427730689475e-08	0.285283	0.3	0.265	0.00150761
DHX29	3.20668848202225e-18	0.285245	0.634	0.608	9.43439818295765e-14
SLC35G2	3.53974903699546e-10	0.285111	0.45	0.413	1.04142956417443e-05
AC090907.2	1.87623522876953e-15	0.285054	0.335	0.283	5.52007166656283e-11
PKIG	7.06133745404818e-55	0.284842	0.77	0.77	2.07751609235552e-50
TESC	1.03585317901847e-18	0.284841	0.467	0.41	3.04758363799024e-14
RNH1	6.75857720651928e-09	0.284591	0.22	0.187	0.000198844
DOCK6	1.22810513217613e-10	0.284106	0.103	0.077	3.6132081093754e-06
GRHL1	1.8810685879592e-09	0.284048	0.295	0.258	5.53429189263476e-05
IFFO1	4.89346755899662e-19	0.283955	0.355	0.299	1.4397070905324e-14
NELFCD	2.37723877689225e-13	0.283799	0.367	0.321	6.99407420549468e-09
NDUFB4	4.56427835997535e-10	0.283358	0.285	0.246	1.34285633628835e-05
TTLL5	3.82535039269501e-58	0.283214	0.803	0.794	1.1254563390348e-53
GLDC	8.16834388519605e-08	0.283195	0.333	0.298	0.00240321
H3F3A	3.68663973768583e-10	0.283001	0.143	0.113	1.08464627722455e-05
RNPC3	7.10611207429833e-70	0.282518	0.835	0.849	2.09068923337931e-65
IL17D	6.39413940742799e-11	0.28214	0.323	0.282	1.88121975505939e-06
NUP35	9.09473097906899e-07	0.282079	0.287	0.258	0.0267576
TAF11	7.2779227451955e-11	0.281751	0.359	0.319	2.14123765086397e-06
AC104964.1	5.68749696615628e-16	0.281477	0.515	0.469	1.67331848241284e-11
RPL10	3.7253958685653e-14	0.281342	0.31	0.263	1.0960487184906e-09
RARS	3.1104586068509e-10	0.281184	0.498	0.466	9.15128026721602e-06
ANKS6	8.62003669722508e-27	0.280929	0.627	0.588	2.53610099669059e-22
VPS9D1	9.0633085791748e-22	0.28071	0.586	0.55	2.66651601707902e-17
AL021368.3	8.40896010222574e-09	0.280388	0.106	0.083	0.0002474
AL445472.1	3.57883266260895e-11	0.280135	0.177	0.143	1.05292835766618e-06
LSMEM1	1.09920696081143e-07	0.280047	0.173	0.145	0.00323398
VIPAS39	3.33300751900114e-11	0.279677	0.337	0.294	9.80604142165324e-07
EMID1	3.92576690244778e-22	0.279655	0.159	0.114	1.15499988036916e-17
ELP2	1.99545046857266e-39	0.279584	0.745	0.721	5.87081482358763e-35
FANK1	7.00292291119159e-08	0.279247	0.324	0.29	0.00206033
LYRM1	5.82211469982483e-09	0.279216	0.24	0.206	0.000171292
LAS1L	3.1206676323075e-10	0.279211	0.359	0.32	9.18131624101189e-06
ARSG	1.71999412482307e-15	0.278607	0.484	0.432	5.06039471464196e-11
PLCH1	1.14310875597859e-08	0.278539	0.308	0.281	0.000336314
E2F3	5.38337035408845e-31	0.278442	0.674	0.644	1.58384139187636e-26
DALRD3	1.38306387889409e-13	0.278404	0.13	0.097	4.06911223809431e-09
CTSL	4.93985244996382e-09	0.278334	0.19	0.158	0.000145335
FADS3	2.5437576584396e-21	0.278208	0.441	0.378	7.48398940689514e-17
TXNL4A	5.76930447935581e-24	0.2782	0.624	0.586	1.69738707087127e-19
SLC7A6OS	1.62112056271419e-07	0.27814	0.259	0.227	0.0047695
MTCL1	1.23233625569544e-47	0.2781	0.779	0.761	3.62565649788154e-43
ARNT2	4.26506556813573e-101	0.278024	0.899	0.91	1.25482494080121e-96
AC018797.2	3.25755379587525e-08	0.277706	0.205	0.173	0.000958405
DDX18	2.60437787000932e-12	0.277576	0.468	0.424	7.66234013135442e-08
SDCBP2-AS1	6.36716373933169e-10	0.277443	0.359	0.321	1.87328324374878e-05
RAB9A	6.71152802581408e-07	0.276938	0.212	0.184	0.019746
VSTM2B	2.25964035929613e-12	0.276846	0.557	0.527	6.64808790108513e-08
PPWD1	2.94980758890858e-15	0.276787	0.537	0.501	8.67862890732794e-11
TRIM17	4.41905625863292e-11	0.276702	0.133	0.104	1.30013054185239e-06
ANO4	4.08966203078963e-15	0.276612	0.689	0.662	1.20321946607862e-10
CCDC191	8.74677034880658e-08	0.276476	0.459	0.431	0.00257339
CFAP52	6.99142558329867e-09	0.276323	0.296	0.259	0.000205695
AL160313.1	1.04206013541225e-13	0.276226	0.112	0.083	3.06584512439637e-09
NFRKB	5.51034482649855e-09	0.276203	0.257	0.221	0.00016212
CA13	1.72712474459881e-08	0.276179	0.337	0.304	0.000508137
INTU	2.50190954940965e-24	0.276175	0.694	0.676	7.36086808531814e-20
JARID2	6.2670412270669e-71	0.276099	0.827	0.821	1.84382619941535e-66
HMCES	1.99440777089057e-07	0.276058	0.308	0.276	0.00586775
WAC-AS1	1.61744115608557e-14	0.275786	0.502	0.46	4.75867362531937e-10
DLEU7	2.12163152094949e-14	0.275611	0.418	0.367	6.2420520977855e-10
ASNS	2.88890775894587e-19	0.275507	0.538	0.484	8.49945551759464e-15
CRLF3	8.80031047069068e-23	0.275464	0.692	0.678	2.5891393435819e-18
SH3PXD2B	3.43418293598865e-09	0.275202	0.218	0.184	0.000101037
MPP6	5.32278967176659e-46	0.274843	0.823	0.812	1.56601794933045e-41
LINC00513	1.86927094300205e-28	0.274777	0.686	0.619	5.49958204140635e-24
GAP43	6.75053961699527e-63	0.274642	0.822	0.822	1.98607626071618e-58
GXYLT1	9.1691420470004e-09	0.274627	0.374	0.338	0.000269765
ADAMTS13	1.19126187757423e-13	0.274624	0.257	0.213	3.50481157001115e-09
ISCU	1.06006640474093e-08	0.274604	0.398	0.362	0.000311882
TENT2	2.33877869743125e-65	0.274521	0.832	0.827	6.88092080571249e-61
MAST4	1.45187163060834e-94	0.274105	0.905	0.918	4.2715515244128e-90
AC108866.1	1.41227403929647e-07	0.273957	0.372	0.339	0.00415505
AMDHD2	1.87453555596402e-15	0.273562	0.19	0.15	5.51507105920174e-11
ICAM5	8.14234135114828e-10	0.273552	0.326	0.287	2.39555824892134e-05
GPC6	7.78061613488951e-33	0.273537	0.682	0.617	2.28913507304584e-28
CPNE8	2.6725229678146e-28	0.273044	0.723	0.684	7.86282982360732e-24
ANKRD62	5.16304119470544e-08	0.272791	0.255	0.222	0.00151902
DZANK1	9.53986815271759e-18	0.272617	0.515	0.469	2.80672460921104e-13
RPSA	1.09886194408311e-07	0.272086	0.303	0.27	0.00323296
LINC01830	6.43708159708146e-18	0.272012	0.259	0.209	1.89385377667734e-13
APOO	6.68390279160415e-08	0.271667	0.547	0.529	0.00196647
PRKCG	1.71913968480692e-14	0.271651	0.486	0.442	5.05788086667043e-10
KITLG	2.94440123504002e-15	0.271562	0.54	0.493	8.66272287361123e-11
STRADB	3.39911313104403e-10	0.27156	0.461	0.429	1.00005307428446e-05
SEMA6D	2.30202500699909e-19	0.271402	0.626	0.594	6.77278777309203e-15
INTS9	9.61528577156295e-11	0.271121	0.483	0.445	2.82891322685154e-06
NDEL1	4.90752990218134e-15	0.27096	0.47	0.421	1.44384437252077e-10
SHQ1	3.94931173356544e-10	0.27071	0.296	0.256	1.16192700513229e-05
TMOD1	2.00539266700915e-25	0.270395	0.663	0.61	5.90006576560763e-21
LINC01934	3.58529709901954e-07	0.270336	0.147	0.122	0.0105483
GSDME	9.01197022677351e-09	0.270227	0.246	0.211	0.000265141
AC011247.1	3.68210813272604e-12	0.269516	0.406	0.36	1.08331303372933e-07
GRID2	1.71203126993226e-75	0.269142	0.896	0.862	5.03696719926771e-71
CFAP46	1.4482908806068e-18	0.269118	0.645	0.601	4.26101659983326e-14
LINC01252	6.77598379408703e-21	0.268817	0.579	0.538	1.99356219205835e-16
ZFAS1	4.18311879413685e-11	0.26877	0.264	0.224	1.230715380423e-06
SLC9A9	1.1440424352813e-08	0.26826	0.476	0.436	0.000336589
SLC25A32	2.6571835837504e-09	0.26805	0.415	0.381	7.81769982175205e-05
NLRP1	1.96818704412646e-15	0.267417	0.419	0.37	5.79060310252446e-11
EGLN3	5.92530934682238e-07	0.267081	0.231	0.201	0.0174329
DICER1-AS1	8.52217967807879e-08	0.26689	0.254	0.222	0.00250731
MCCC2	3.29890873950759e-14	0.266799	0.472	0.426	9.70571940250527e-10
NAV2	2.04887348117656e-180	0.266713	0.939	0.961	6.02799066896957e-176
QTRT2	2.81662743100765e-08	0.266589	0.31	0.273	0.00082868
ING2	1.36797685893641e-09	0.266274	0.152	0.122	4.0247247166768e-05
CRYM	4.31795190975687e-28	0.266249	0.56	0.486	1.27038463136957e-23
TMEM116	7.7434099570744e-15	0.266211	0.395	0.344	2.27818864347086e-10
CYB561D1	4.54839015003369e-17	0.266109	0.188	0.146	1.33818186604141e-12
AC125616.1	5.25082535262174e-08	0.266086	0.19	0.162	0.00154485
STEAP2	5.18330158009646e-17	0.26604	0.641	0.605	1.52497915788018e-12
ZNF44	4.05583586663282e-09	0.265856	0.484	0.454	0.000119327
AL357153.2	1.0379381962841e-45	0.265379	0.753	0.746	3.05371796728746e-41
NEU3	5.33770138934756e-13	0.265236	0.367	0.32	1.57040512575994e-08
BEAN1	4.3614502071942e-12	0.265169	0.284	0.241	1.28318226545861e-07
IL1RAP	1.25246552816718e-32	0.265145	0.512	0.43	3.68487883042067e-28
PPP2R5A	5.18624651100498e-07	0.265088	0.379	0.347	0.0152585
D2HGDH	9.70198265631225e-18	0.265032	0.233	0.185	2.85442031731363e-13
ATP10D	1.77648181678882e-08	0.264825	0.385	0.348	0.000522659
TTF1	3.74968891110867e-10	0.26458	0.348	0.306	1.10319597453728e-05
TMEM117	1.9368186682635e-48	0.264359	0.846	0.85	5.69831420389803e-44
FADS6	2.64865507869724e-08	0.264043	0.181	0.152	0.000779261
ZNF766	2.7874870248619e-08	0.264039	0.261	0.227	0.000820107
MED12L	4.96668262147994e-102	0.26372	0.914	0.936	1.46124769406561e-97
CAPRIN2	2.74562422192713e-18	0.263677	0.689	0.668	8.0779010233318e-14
COQ9	1.73788108529956e-10	0.263645	0.397	0.357	5.11301994105983e-06
ALG6	5.57745726889643e-12	0.263577	0.367	0.321	1.64094370308202e-07
MRRF	1.48802635368908e-09	0.263408	0.422	0.383	4.37792233518865e-05
PPFIBP1	4.07988468082574e-80	0.2633	0.851	0.842	1.20034287194574e-75
GLMN	1.58305946417822e-26	0.262709	0.707	0.682	4.65751924955875e-22
LINC01250	1.40641972613347e-104	0.262531	0.874	0.898	4.13782747625729e-100
IQCK	2.94791829077142e-08	0.262267	0.499	0.463	0.000867307
RMND1	2.76430718034561e-11	0.262189	0.435	0.393	8.13286815529483e-07
FAM149A	1.24351172758453e-06	0.261968	0.204	0.176	0.0365854
CAMKK2	1.33079650137931e-35	0.261648	0.725	0.697	3.91533638670806e-31
NYAP1	5.18791563674132e-12	0.261366	0.231	0.192	1.52633665948566e-07
GLS2	5.09603887158263e-12	0.261194	0.552	0.518	1.49930559640833e-07
DHDDS	4.88609763674323e-14	0.26112	0.418	0.372	1.43753878570623e-09
COX7C	5.75871809059613e-07	0.26086	0.285	0.254	0.0169427
GGH	3.17130086784808e-08	0.260814	0.2	0.169	0.000933028
AP1S3	2.68695088148356e-10	0.26061	0.386	0.345	7.90527818841277e-06
SLC25A13	1.59134459297119e-07	0.260536	0.434	0.401	0.00468189
ATP5MD	1.06977896814392e-14	0.260485	0.311	0.263	3.14739670217624e-10
ANAPC5	2.7728521850676e-20	0.260449	0.679	0.655	8.1580084136874e-16
KANSL3	4.05817519377212e-16	0.260152	0.597	0.557	1.19395572375969e-11
MCM3AP	7.46491042446233e-10	0.260095	0.489	0.451	2.19625129598106e-05
SLC25A37	1.32314908857248e-20	0.259403	0.562	0.505	3.89283693348908e-16
RNFT1	2.27182995313298e-07	0.259388	0.274	0.241	0.00668395
WSB1	9.03283126968957e-36	0.259138	0.782	0.753	2.65754928785537e-31
SSBP1	5.63191456118857e-14	0.259035	0.548	0.508	1.65696558304729e-09
PDE10A	3.8022152927512e-106	0.258837	0.841	0.737	1.11864976128033e-101
LAMB1	2.17666587524809e-13	0.258832	0.562	0.526	6.40396867156741e-09
GPR89B	2.42913054557852e-11	0.258749	0.456	0.415	7.14674497814656e-07
TXNDC15	2.75647334577099e-08	0.258701	0.361	0.351	0.000810982
MAP3K5	6.38036849760494e-56	0.25869	0.806	0.803	1.87716821568035e-51
KANSL1	4.64673680677673e-199	0.258487	0.914	0.947	1.36711643592178e-194
NCAPD3	1.90672568039165e-09	0.258341	0.398	0.36	5.60977762428027e-05
PDIA6	4.09435939920757e-15	0.258242	0.561	0.523	1.20460147884086e-10
AC107072.1	1.41430015326166e-10	0.258076	0.254	0.216	4.16101248091112e-06
AL391987.2	2.39952261009412e-10	0.257903	0.317	0.276	7.05963547115792e-06
SDC3	1.13427171384714e-06	0.25746	0.297	0.265	0.0333714
CA4	1.06476900040405e-09	0.257387	0.143	0.115	3.13265687608874e-05
ZMAT4	5.63083744167173e-72	0.257175	0.846	0.83	1.65664868371424e-67
LINC00884	2.24008643133123e-08	0.257046	0.363	0.327	0.000659056
CYP4X1	1.93356051996075e-14	0.256627	0.524	0.482	5.68872840577654e-10
TOMM7	8.64785909149087e-08	0.256581	0.195	0.166	0.00254429
RNMT	7.68901676214018e-20	0.256411	0.718	0.688	2.26218562158926e-15
CC2D2A	3.89533178186319e-07	0.256306	0.454	0.424	0.0114605
MATR3	1.11197631585927e-11	0.256236	0.185	0.15	3.27154551888957e-07
APBB2	1.35942830902008e-53	0.256184	0.83	0.833	3.99957402796797e-49
TXNDC11	1.03705189046774e-12	0.256069	0.507	0.467	3.05111036694514e-08
ZNF518A	1.01921318792783e-28	0.25597	0.76	0.746	2.99862712020248e-24
ETFA	3.77480217414941e-07	0.255888	0.417	0.388	0.0111058
OSBPL1A	3.96160275555658e-122	0.255375	0.89	0.908	1.1655431467123e-117
ATG14	3.2348284331907e-09	0.25519	0.463	0.423	9.51718873329035e-05
TIGD7	1.03646808416222e-07	0.255055	0.217	0.187	0.00304939
TUBGCP6	1.10280137792985e-06	0.254846	0.278	0.26	0.0324455
PTPDC1	5.77606659657635e-16	0.254834	0.599	0.569	1.69937655337873e-11
PRB2	1.46014616385632e-32	0.254711	0.747	0.734	4.29589602868168e-28
FAM153B	8.67641988295277e-15	0.254682	0.412	0.393	2.55268949376353e-10
CDH4	1.31151018123187e-15	0.254549	0.588	0.546	3.85859410420227e-11
ACVR1C	3.55706425300656e-09	0.254525	0.269	0.234	0.000104652
KLRG1	2.04703486984481e-07	0.254318	0.264	0.232	0.00602258
RPL5	3.01475030436132e-09	0.254103	0.419	0.384	8.86969687046145e-05
ANKS1A	2.58182004821834e-41	0.254015	0.771	0.759	7.59597276386319e-37
LINC01184	1.83197617645367e-48	0.253984	0.829	0.832	5.38985710874434e-44
RPL37	4.82321416929214e-10	0.253966	0.507	0.478	1.41903784074744e-05
ZNF529	1.14056132254093e-14	0.253682	0.594	0.563	3.35564546704766e-10
ETFDH	1.98511437261202e-12	0.253581	0.562	0.529	5.84040499566182e-08
PLA2R1	3.23778478458271e-07	0.253281	0.395	0.373	0.00952589
HDAC6	1.9980613634264e-13	0.253066	0.29	0.246	5.8784963373368e-09
ODF2	2.97446417834288e-13	0.252873	0.342	0.294	8.75117105910259e-09
MARC2	2.65843441846633e-12	0.252742	0.476	0.434	7.8213799025698e-08
ZSCAN18	4.42213842279428e-15	0.252375	0.455	0.407	1.3010373453703e-10
AL022068.1	5.29492636675668e-12	0.252155	0.164	0.131	1.55782028636348e-07
CORO6	2.09024935859224e-14	0.251866	0.485	0.434	6.14972263791424e-10
C3orf67	1.58327673436741e-11	0.251671	0.271	0.23	4.65815848018236e-07
ASPSCR1	1.47899882738577e-08	0.251652	0.301	0.265	0.000435136
ARHGAP28	2.92245530730125e-07	0.251612	0.264	0.232	0.00859816
ZNF667-AS1	2.87454840385186e-10	0.251589	0.371	0.329	8.45720885897255e-06
MMAA	5.5213393334171e-07	0.251459	0.147	0.123	0.0162443
KATNAL2	1.42660895001223e-06	0.25133	0.506	0.481	0.0419723
ESF1	2.64309267874763e-17	0.251328	0.68	0.646	7.77624297014341e-13
ENOX1	4.60624922413019e-153	0.251154	0.937	0.96	1.35520458423134e-148
SCRN2	3.45577472782969e-07	0.251153	0.129	0.106	0.0101672
ORMDL1	3.16830288102834e-14	0.250982	0.507	0.466	9.32146390627348e-10
RPL34-AS1	6.64425076383402e-12	0.250946	0.244	0.205	1.95480501722761e-07
P3H2-AS1	1.81352335236908e-12	0.250746	0.237	0.197	5.33556705500508e-08
CCDC130	3.93598554583968e-08	0.250721	0.389	0.355	0.00115801
CIAO1	5.5005392581089e-10	0.250718	0.428	0.396	1.61831365512822e-05
FGF9	7.37199265657341e-11	0.250576	0.408	0.364	2.16891395949046e-06
COLQ	2.76965310582012e-18	0.250471	0.636	0.613	8.14859640263336e-14
CFAP221	3.92713034377579e-28	0.249969	0.726	0.696	1.15540101844227e-23
DMAC2	7.7404637843542e-07	0.249847	0.145	0.121	0.0227732
ZNF2	6.4487412163609e-12	0.249794	0.155	0.122	1.89728415326554e-07
PPP1R3E	5.37449328696216e-10	0.249758	0.279	0.24	1.58122966995714e-05
NTPCR	2.65449144945e-08	0.249118	0.404	0.366	0.000780978
RBAK-RBAKDN	5.50287140573202e-17	0.249097	0.624	0.59	1.61899979628042e-12
C19orf66	4.24051319511792e-09	0.249043	0.316	0.281	0.00012476
BCAT2	7.51879271921644e-08	0.248627	0.327	0.292	0.0022121
ZNF512	1.59934255246494e-08	0.248544	0.402	0.366	0.000470543
STRBP	3.3771237169113e-160	0.24847	0.907	0.928	9.93583568752474e-156
JCAD	9.3756834284048e-09	0.247987	0.377	0.339	0.000275842
MLEC	7.0862718403392e-08	0.247923	0.348	0.314	0.00208485
CEP164	2.32043916674746e-12	0.247695	0.532	0.491	6.82696407248769e-08
FDPS	2.76963412236392e-15	0.247656	0.437	0.387	8.14854055140689e-11
BCCIP	9.02954611577382e-09	0.247328	0.416	0.38	0.000265658
DOCK2	4.24474689598654e-08	0.247308	0.141	0.115	0.00124885
TTC26	5.01679558651947e-10	0.246876	0.472	0.432	1.47599142950989e-05
PCDH19	1.11454829211037e-14	0.246726	0.456	0.402	3.27911253021792e-10
CYSTM1	2.84075834584794e-07	0.246112	0.343	0.308	0.0083578
SLC12A2	3.94578391852332e-39	0.246078	0.793	0.787	1.16088908666875e-34
ILK	1.48843403409879e-07	0.246033	0.278	0.247	0.00437912
SPART	6.44194206946488e-28	0.245881	0.745	0.709	1.89528377625726e-23
RPL11	4.19378397158624e-14	0.245564	0.263	0.218	1.23385318228039e-09
RPF2	1.50163268033358e-08	0.245477	0.342	0.304	0.000441795
TMEM231	4.57311426824304e-07	0.24538	0.131	0.108	0.0134546
EXOSC7	6.13717508418935e-10	0.244722	0.349	0.309	1.80561828151935e-05
BRD1	2.48636082099105e-11	0.244436	0.561	0.533	7.31512217143777e-07
ERICH1	2.13475988565937e-18	0.244341	0.54	0.498	6.28067705959843e-14
ANKRD42	1.29642821772535e-11	0.24429	0.537	0.503	3.81422145936976e-07
ST3GAL5	1.59125876795411e-11	0.244171	0.587	0.562	4.68164242119779e-07
GRASP	7.10834521733819e-17	0.244072	0.246	0.199	2.09134624639307e-12
QTRT1	1.15793833523362e-10	0.244041	0.401	0.36	3.40677037609083e-06
GAREM1	2.2706336814662e-23	0.243273	0.738	0.716	6.6804313542417e-19
WDR53	1.63044687906397e-06	0.24327	0.15	0.126	0.0479694
LTA4H	4.2829389851855e-09	0.243216	0.4	0.361	0.000126008
RNF121	1.44185834419539e-08	0.243158	0.415	0.378	0.000424209
CALU	1.47415518975424e-08	0.243101	0.433	0.398	0.000433711
GATB	2.40088595807682e-14	0.242981	0.536	0.506	7.0636465772578e-10
KLHL28	4.08198880505908e-07	0.242556	0.5	0.469	0.0120096
GTF3A	1.13225846316608e-06	0.24215	0.39	0.357	0.0333122
WDR35	1.57826045495978e-09	0.241872	0.458	0.419	4.64340008453718e-05
PQLC3	2.40106255517031e-08	0.241697	0.183	0.154	0.000706417
TRMU	2.85434998153355e-08	0.241559	0.389	0.353	0.000839778
TMEM131L	3.16802850639264e-18	0.241406	0.58	0.558	9.32065666865778e-14
AL031590.1	2.8135393511423e-10	0.241126	0.271	0.232	8.27771412499577e-06
OGA	8.07800895996555e-69	0.240971	0.88	0.89	2.37663101611147e-64
RNF114	1.60231106361531e-11	0.240862	0.414	0.37	4.71415938026261e-07
AC025682.1	2.83027902641648e-07	0.240768	0.377	0.343	0.00832696
CCDC24	1.630997941766e-13	0.2407	0.315	0.268	4.79855904446974e-09
NBPF12	2.80677521656845e-12	0.240643	0.528	0.509	8.25781336466603e-08
ZNF610	1.61433217806156e-06	0.240418	0.153	0.129	0.0474953
LURAP1	1.31075839137951e-10	0.239515	0.262	0.223	3.85638226327766e-06
PEX1	1.21139212709919e-09	0.239397	0.521	0.503	3.56403677713853e-05
AC097103.2	3.09264442878776e-19	0.238908	0.714	0.688	9.09886917393646e-15
PROS1	5.56478981311683e-08	0.23879	0.35	0.314	0.00163722
MCPH1-AS1	3.15057864706094e-10	0.238575	0.497	0.459	9.26931743751799e-06
URB1	1.98924366451637e-10	0.238423	0.442	0.401	5.85255378537362e-06
RAB3C	6.73540584432985e-27	0.238328	0.78	0.777	1.98162375346028e-22
COX15	3.59004881841489e-09	0.238244	0.325	0.288	0.000105623
MARCH4	1.33003198078272e-08	0.238224	0.564	0.543	0.000391309
IQSEC3	1.29132321023766e-48	0.238106	0.795	0.784	3.79920201684022e-44
PBX1	1.21582721029574e-156	0.237864	0.938	0.963	3.57708523541108e-152
CCDC93	1.1775388797975e-18	0.237574	0.665	0.636	3.46443713825224e-14
AC009554.1	1.5875197680077e-06	0.237381	0.267	0.238	0.0467064
CACNG3	2.36139373883777e-47	0.237262	0.835	0.832	6.94745651903461e-43
HSF4	1.3101180478943e-21	0.236963	0.313	0.253	3.85449830870983e-17
STX6	1.76788792441365e-10	0.236604	0.546	0.514	5.2013030624174e-06
ADARB1	9.42310670766763e-31	0.236586	0.725	0.708	2.7723722244629e-26
ZNF493	1.32804343354594e-08	0.236268	0.396	0.359	0.000390724
GOLGA8A	4.72394370651336e-25	0.235861	0.797	0.808	1.3898314778933e-20
CFAP54	2.01453060021167e-14	0.235803	0.485	0.433	5.92695047888274e-10
KCNK15-AS1	6.94546996330382e-14	0.235591	0.209	0.17	2.04342671790362e-09
SPATA33	2.08498184593428e-08	0.23555	0.239	0.206	0.000613423
PHC1	1.12686804642656e-08	0.235547	0.431	0.396	0.000331536
TEFM	6.94628836517367e-09	0.235103	0.424	0.388	0.000204367
AGL	5.67240773287408e-09	0.23497	0.57	0.547	0.000166888
UMPS	7.6087853467964e-09	0.234835	0.267	0.231	0.000223858
TDRKH	2.41644632225328e-07	0.234829	0.181	0.154	0.00710943
NFU1	1.18761054580352e-07	0.234818	0.385	0.351	0.00349407
NRG2	1.00868712482329e-26	0.234812	0.76	0.743	2.96765838994261e-22
SLC30A3	7.77762862678202e-14	0.234771	0.313	0.267	2.28825611828554e-09
RRAGB	1.01209350803263e-10	0.234562	0.506	0.471	2.9776803099828e-06
TBC1D2	7.4444862411616e-11	0.234404	0.163	0.131	2.19024229701215e-06
CRELD1	2.91606227423076e-13	0.233806	0.535	0.499	8.57934681701432e-09
FASTKD2	3.39552058441871e-09	0.233525	0.468	0.429	9.9899611114183e-05
TATDN3	8.64968238350755e-09	0.233488	0.491	0.466	0.000254482
PPM1L	4.78669259239246e-169	0.233452	0.924	0.956	1.40829282760778e-164
NBPF15	5.45583847544664e-09	0.23345	0.398	0.359	0.000160516
CEMIP	8.53089052420617e-22	0.233374	0.595	0.536	2.5098733011267e-17
HS1BP3	5.27112121795315e-12	0.233311	0.423	0.376	1.550816573534e-07
ZNF516	9.85591192814709e-08	0.233036	0.433	0.398	0.00289971
PTPRF	1.97178126502991e-13	0.232644	0.575	0.542	5.80117765984448e-09
PRMT9	1.97468307471863e-07	0.23264	0.495	0.465	0.00580972
USP12	1.75718057515236e-09	0.232599	0.531	0.496	5.16980097015576e-05
DTX4	5.74623859635036e-11	0.232514	0.283	0.243	1.69060085743224e-06
UBA6-AS1	4.58574494395113e-23	0.232468	0.82	0.823	1.34917201995986e-18
RFLNA	2.51648513251624e-11	0.232343	0.537	0.51	7.40375090837602e-07
RBMX	5.12882738563237e-16	0.232223	0.591	0.549	1.5089523051269e-11
SVOP	3.55872489687434e-32	0.232051	0.75	0.729	1.0470124519094e-27
TASP1	3.42727063143438e-45	0.231942	0.803	0.802	1.00833729247431e-40
TAF4	1.00119587974456e-06	0.231731	0.449	0.42	0.0294562
STX17	3.46944170969726e-07	0.231604	0.492	0.468	0.0102074
RAB11FIP1	5.45864864080475e-09	0.231587	0.299	0.261	0.000160599
STAT4	5.56893345584803e-26	0.231413	0.71	0.684	1.63843591204505e-21
AC096576.3	8.552502280225e-25	0.231381	0.305	0.247	2.516231695865e-20
KCNK1	2.63209018923762e-40	0.23041	0.807	0.805	7.743872545756e-36
ZRANB3	1.46680724329899e-29	0.230349	0.785	0.776	4.31549359050996e-25
KIAA0895L	1.73033741193991e-12	0.230332	0.35	0.306	5.09082569966841e-08
UCK2	2.12342140627206e-09	0.230309	0.51	0.483	6.24731811939302e-05
ZFYVE27	1.30219871929151e-09	0.229748	0.47	0.434	3.83119885202756e-05
COL11A1	1.5357892461097e-23	0.229708	0.51	0.441	4.51844554097935e-19
EML1	2.15399553036838e-16	0.229513	0.653	0.622	6.33727024989681e-12
TMEM67	1.19202661879871e-14	0.229314	0.637	0.61	3.50706151516769e-10
FAM160B2	7.62002766870451e-08	0.229149	0.239	0.207	0.00224189
ITGA9	2.0696531975218e-15	0.229116	0.646	0.608	6.08912667242888e-11
LRRC20	1.63824239441538e-06	0.228884	0.298	0.266	0.0481987
RBBP5	6.5617264497215e-08	0.228792	0.4	0.365	0.00193053
FAM47E-STBD1	4.23338047369444e-12	0.228705	0.161	0.13	1.24550286916564e-07
PTPN2	9.52605257846648e-27	0.228698	0.742	0.721	2.80265992911062e-22
TNFRSF25	1.76701640074811e-11	0.228663	0.554	0.526	5.19873895264102e-07
AC012358.3	6.61751462056727e-07	0.228614	0.351	0.317	0.0194694
GCDH	4.99359470166056e-07	0.228462	0.21	0.181	0.0146917
IFT122	4.31955144388095e-15	0.228225	0.593	0.552	1.27085523030421e-10
RFC3	5.64827682102012e-11	0.228151	0.403	0.358	1.66177952351233e-06
DTWD1	1.00125924759217e-20	0.227898	0.725	0.718	2.94580483234091e-16
MORN1	1.37647416531075e-08	0.22778	0.405	0.367	0.000404972
GSTO2	8.39474616644932e-18	0.227634	0.513	0.454	2.46981826963105e-13
APH1B	8.9674643791088e-07	0.227608	0.407	0.376	0.0263832
SLC39A10	3.11816605045833e-60	0.227553	0.864	0.875	9.17395633705346e-56
B3GALNT2	1.28641209257453e-08	0.227337	0.495	0.463	0.000378475
TPM3	2.62232583236574e-12	0.22712	0.614	0.586	7.71514483140324e-08
GATAD1	6.25260477036999e-09	0.226828	0.476	0.445	0.000183958
PLPP1	1.3639345382069e-21	0.226519	0.766	0.76	4.01283180485852e-17
MOB1B	7.81508297558761e-13	0.226509	0.61	0.589	2.29927556224763e-08
HLTF	2.41737172132082e-09	0.22633	0.687	0.666	7.11214934129797e-05
DTWD2	1.85615894767224e-10	0.226303	0.658	0.646	5.46100523994649e-06
SRPK1	9.56075340787147e-31	0.226292	0.779	0.769	2.81286926012987e-26
TCF7L2	1.16423199692939e-11	0.225912	0.528	0.488	3.42528695816596e-07
KLHL25	2.24343598569939e-07	0.225756	0.238	0.207	0.00660041
TACC1	4.58242119940346e-63	0.225516	0.841	0.853	1.34819414107649e-58
TYSND1	2.90273022039518e-14	0.225439	0.262	0.216	8.54012258142466e-10
SLC16A10	9.38499108629028e-10	0.225421	0.559	0.531	2.76115822749746e-05
SAMD13	2.30903306512395e-09	0.225415	0.145	0.117	6.79340618090118e-05
AC005480.1	8.50201341013852e-07	0.225386	0.231	0.201	0.0250138
LRRC8C-DT	2.16070200830534e-07	0.225258	0.232	0.201	0.006357
MANBA	1.88288563381164e-11	0.225044	0.581	0.538	5.53963782323721e-07
GEMIN5	1.84182548023392e-09	0.225029	0.411	0.37	5.41883474539622e-05
CKMT1B	9.74963601508948e-08	0.224992	0.407	0.37	0.00286844
KIF16B	8.26916817512671e-20	0.22486	0.764	0.756	2.43287196880403e-15
RAPH1	5.17253921573437e-24	0.224826	0.792	0.775	1.52181276266121e-19
IMMT	1.00257882208029e-11	0.224782	0.531	0.488	2.94968715244241e-07
MOK	1.96083698076705e-30	0.224674	0.735	0.719	5.76897848111474e-26
PCDH9-AS2	1.26864033753006e-42	0.224535	0.564	0.476	3.73246673704719e-38
MAP1LC3A	6.34676854240808e-07	0.224402	0.327	0.294	0.0186728
AF117829.1	4.56303153331214e-40	0.224359	0.78	0.777	1.34248950741577e-35
Z84485.1	4.70481464411797e-08	0.22388	0.279	0.244	0.0013842
INTS6L	7.10379425909903e-10	0.223872	0.502	0.466	2.09000730896953e-05
KCNH1	7.63775121317525e-36	0.2238	0.824	0.82	2.24710278442829e-31
SLC36A1	1.21201837195222e-13	0.223615	0.558	0.539	3.56587925212062e-09
GMDS-DT	3.01678586658026e-24	0.223311	0.739	0.728	8.87568569806579e-20
SEC31B	2.38193210749672e-09	0.223267	0.338	0.299	7.00788245346609e-05
SH2D5	1.31355317396968e-07	0.223263	0.145	0.12	0.0038646
GOLGA1	3.63291428318452e-12	0.223245	0.489	0.444	1.06883971125572e-07
TMEM87B	4.0221606033925e-07	0.223163	0.368	0.334	0.0118336
GRIK4	3.4298145949034e-21	0.222945	0.763	0.723	1.00908575196653e-16
LYPD5	6.9337614529234e-09	0.222775	0.191	0.16	0.000203998
UNC13C	4.51294216562423e-20	0.222463	0.738	0.703	1.3277527145483e-15
AP006621.3	1.82793187962353e-13	0.222392	0.344	0.296	5.37795838304038e-09
AIFM2	1.44768568696178e-10	0.222254	0.299	0.258	4.25923605961025e-06
C4orf45	1.28746889282215e-06	0.222111	0.276	0.246	0.0378786
DCAF6	2.30914732030526e-78	0.222101	0.886	0.896	6.79374233107011e-74
ANKRD28	2.53601794347068e-56	0.222062	0.845	0.854	7.46121839148508e-52
ARHGEF11	6.92331109038447e-41	0.221816	0.796	0.802	2.03690735590202e-36
SNAP25-AS1	7.48601415570565e-20	0.221611	0.721	0.668	2.20246022475016e-15
PAAF1	1.38835040643373e-09	0.221567	0.402	0.362	4.08466573076867e-05
CARS2	5.62245345429293e-09	0.221376	0.608	0.587	0.000165418
PGP	1.45075980224545e-15	0.220997	0.556	0.546	4.26828041418635e-11
CCDC149	1.23837341221331e-11	0.220725	0.6	0.571	3.64341841607279e-07
C11orf74	4.48365149401342e-08	0.22072	0.503	0.47	0.00131914
MSANTD2	9.94386987588619e-07	0.220642	0.487	0.462	0.0292559
AC087280.2	2.20828816079527e-11	0.220325	0.547	0.503	6.49700459787576e-07
PRUNE2	1.55625770221202e-20	0.220175	0.821	0.823	4.57866578567797e-16
SCN7A	1.04368900243663e-07	0.22009	0.114	0.125	0.00307064
DNAJC24	6.97021785968245e-09	0.220005	0.496	0.461	0.000205071
ABLIM1	2.11667931876869e-35	0.219842	0.866	0.88	6.22748222374936e-31
ZNF717	4.63472245110789e-07	0.219839	0.478	0.448	0.0136358
LHPP	3.12682820253609e-13	0.219649	0.599	0.568	9.19944125468142e-09
GPATCH2	6.32176668062451e-22	0.219593	0.752	0.743	1.85992697510654e-17
MIR29B2CHG	2.3334495628645e-82	0.219591	0.86	0.878	6.86524195890365e-78
FHL1	4.3638518256089e-13	0.219312	0.642	0.608	1.2838888456124e-08
UXS1	6.58987415120322e-17	0.219224	0.635	0.602	1.9388068740255e-12
C11orf58	3.83964745733023e-18	0.219204	0.691	0.683	1.12966267842113e-13
EPHB1	2.48026129886749e-16	0.219055	0.681	0.661	7.29717676739805e-12
RAB30-AS1	1.10986242766273e-11	0.218875	0.58	0.549	3.26532624842651e-07
COPS4	1.36233200038186e-06	0.218785	0.448	0.425	0.0400812
AC004982.2	1.16041855525932e-07	0.218702	0.104	0.083	0.00341407
PRELID3A	7.92770372496758e-09	0.218603	0.398	0.359	0.000233241
POLR1A	1.0162109630044e-07	0.218572	0.472	0.442	0.00298979
CACNB2	1.78611991954016e-96	0.218168	0.934	0.962	5.2549434152791e-92
TRMT13	3.68820498224077e-10	0.217984	0.386	0.344	1.08510678782506e-05
CDKL1	2.78286993763028e-35	0.217717	0.742	0.745	8.18748164350205e-31
NPHP1	1.66585454289414e-12	0.217702	0.547	0.516	4.90111065064884e-08
IFT43	1.33626438058037e-21	0.217677	0.707	0.687	3.9314234341055e-17
CHSY1	3.24684039618313e-08	0.217441	0.566	0.537	0.000955253
GLRA3	1.19889107626248e-14	0.217379	0.623	0.584	3.52725743547185e-10
PVT1	1.20465339173319e-13	0.21652	0.625	0.608	3.54421074381821e-09
PHF7	2.99066458082887e-08	0.216373	0.258	0.225	0.000879883
HTATIP2	4.23826139350619e-07	0.216208	0.21	0.181	0.0124694
SPOCK3	5.5937255196845e-12	0.216135	0.469	0.428	1.64572998514638e-07
GPSM2	9.4667809263543e-12	0.216042	0.293	0.25	2.7852216163427e-07
NPEPL1	2.27573046475102e-08	0.215814	0.177	0.148	0.000669543
PPM1H	3.914774258661e-66	0.2157	0.851	0.873	1.15176573464065e-61
LYPLAL1	4.85668676959966e-08	0.215577	0.606	0.595	0.00142889
NASP	1.14019795896788e-08	0.215502	0.475	0.442	0.000335458
GRAMD1C	6.93690295769972e-10	0.215421	0.378	0.336	2.04090621918483e-05
SMIM12	2.17861351439839e-12	0.215377	0.546	0.522	6.4096988207115e-08
WDR90	4.80633930714461e-08	0.21527	0.116	0.092	0.00141407
EIF2B1	3.38210497392511e-07	0.215219	0.32	0.287	0.00995049
TAPT1-AS1	1.82161163669949e-36	0.215078	0.78	0.784	5.35936359633357e-32
MALAT1	1.94595917793587e-223	0.215015	1	0.999	5.72520649740513e-219
MPPED1	1.98755612708259e-21	0.214931	0.7	0.666	5.8475888814897e-17
NCKAP5L	9.27354362678493e-07	0.214596	0.251	0.221	0.0272837
PXYLP1	1.59470692186381e-12	0.214456	0.632	0.608	4.69178723481552e-08
MRAS	3.31637901067597e-11	0.214281	0.549	0.52	9.75711868730978e-07
ELMOD1	4.85877524873122e-28	0.214277	0.808	0.802	1.42950026592921e-23
CBLN2	9.29436962811933e-32	0.214068	0.803	0.767	2.73449648828899e-27
MAP3K13	1.95282608134865e-51	0.21401	0.832	0.842	5.74540961393586e-47
MEF2C-AS1	4.57961970111051e-42	0.213927	0.875	0.894	1.34736991226372e-37
MRNIP	5.74297780520507e-09	0.213871	0.519	0.49	0.000168964
OGFOD3	9.69122738362174e-07	0.2136	0.264	0.234	0.0285126
NBPF3	2.30128693094367e-08	0.213442	0.326	0.289	0.000677062
MARCH8	1.11657035649598e-08	0.213235	0.501	0.475	0.000328506
NTRK3	3.25808823025542e-99	0.213227	0.9	0.927	9.58562138223448e-95
FCF1	6.1042728931614e-08	0.213186	0.22	0.189	0.00179594
FAM213A	2.40123794831762e-11	0.213026	0.598	0.569	7.06468216774527e-07
LRTM2	1.03737208101856e-08	0.212716	0.132	0.106	0.000305205
ADCYAP1	2.12418754975232e-07	0.212599	0.145	0.12	0.00624957
HACL1	2.34664674648019e-18	0.212337	0.696	0.676	6.90406939281936e-14
GALNT8	2.70745786619883e-07	0.212268	0.446	0.428	0.00796561
OFD1	1.30973345013071e-08	0.211833	0.5	0.465	0.000385337
RYK	1.37349274432012e-34	0.211813	0.812	0.814	4.04095300306422e-30
PDE3B	8.5018495127341e-15	0.211795	0.753	0.74	2.5013291451415e-10
RSPH3	1.15956098162984e-10	0.211781	0.602	0.586	3.41154436405316e-06
PEPD	7.37988168841848e-12	0.211634	0.448	0.401	2.1712349915496e-07
AL645568.1	1.3181629541705e-16	0.211429	0.643	0.615	3.87816722746504e-12
PTPRJ	1.07076688108422e-20	0.2114	0.762	0.755	3.15030324083789e-16
FZD4	1.992967653788e-07	0.211199	0.172	0.145	0.00586351
ASAP2	7.05792481965996e-13	0.210975	0.632	0.592	2.07651206119216e-08
SLIT2	2.01094795702453e-42	0.210903	0.741	0.658	5.91640998436188e-38
NEPRO	2.38915300080891e-07	0.210575	0.438	0.409	0.00702913
RHPN1	4.67204089956397e-11	0.209848	0.307	0.266	1.37456115306071e-06
RTKN2	1.72270598701175e-07	0.209737	0.301	0.267	0.00506837
SYTL2	9.91840736246525e-38	0.209317	0.789	0.785	2.9180946301109e-33
SELENON	5.41618517951815e-07	0.209255	0.122	0.101	0.015935
KLHL29	4.40624928689636e-68	0.209078	0.866	0.895	1.29636260269778e-63
PNCK	7.03246472669666e-10	0.208958	0.351	0.31	2.06902144724143e-05
TBC1D16	1.2288190951179e-07	0.208812	0.194	0.166	0.00361531
AL450423.1	5.98476309981276e-37	0.20879	0.187	0.132	1.76077715159591e-32
MTF2	8.62874835540217e-11	0.20862	0.69	0.673	2.53866405364287e-06
MVD	4.79373558836738e-13	0.208445	0.405	0.358	1.41036494745357e-08
ZNF682	4.00817141652776e-07	0.208379	0.29	0.257	0.0117924
NDUFAF6	5.88690586370295e-13	0.20832	0.649	0.628	1.73198657416005e-08
HMGN3	1.73003022824905e-16	0.208005	0.678	0.664	5.08992193453154e-12
CRY2	3.23235849372345e-08	0.207961	0.549	0.52	0.000950992
TMEM267	3.01640952822523e-07	0.207908	0.417	0.384	0.00887458
TLK1	4.60500767884514e-44	0.20739	0.854	0.86	1.35483930919303e-39
RPH3A	8.7264071777018e-15	0.207231	0.687	0.642	2.56739625575165e-10
SEMA5B	5.61652944750724e-08	0.207101	0.383	0.347	0.00165244
RNF169	2.93900035218297e-15	0.206927	0.673	0.657	8.64683293615751e-11
GLIDR	1.55250182779445e-08	0.206768	0.478	0.438	0.000456762
TXLNG	2.5403878899467e-08	0.206694	0.575	0.552	0.000747408
TSGA10	4.45703773620656e-24	0.20643	0.762	0.754	1.31130507236933e-19
TTC7A	9.27163044213699e-10	0.206199	0.448	0.408	2.72780639238112e-05
TARSL2	3.76187174527287e-19	0.20598	0.72	0.708	1.10678028617673e-14
ANKRD24	5.08537746588496e-14	0.205362	0.655	0.627	1.49616890423801e-09
AC127526.1	6.76963221123552e-07	0.205347	0.396	0.37	0.0199169
DENND5B	4.65253080091247e-84	0.205327	0.909	0.941	1.36882108693646e-79
ST3GAL1	4.8054896305528e-07	0.205233	0.499	0.489	0.0141382
ZNRF3	3.54143882352169e-15	0.20507	0.755	0.744	1.04192671626832e-10
NQO2	1.72789825461296e-26	0.204916	0.753	0.749	5.0836494548968e-22
NLN	2.61034293086446e-15	0.204824	0.667	0.653	7.67988993689633e-11
BEX3	1.90546176996519e-14	0.204585	0.544	0.491	5.60605907341459e-10
SPATS2	2.54936469668893e-65	0.204447	0.842	0.861	7.50048587412849e-61
PIAS1	4.25416052625416e-64	0.204262	0.873	0.892	1.25161656842924e-59
NPAS2	6.73079690662956e-58	0.203939	0.843	0.859	1.98026775789948e-53
CA11	1.71309268566547e-08	0.203898	0.563	0.536	0.000504009
PLA2G4C	2.64445628619676e-10	0.203656	0.597	0.573	7.78025483961949e-06
DMPK	2.3260435920052e-12	0.203604	0.341	0.296	6.84345285203851e-08
NRXN3	8.10507747884677e-66	0.203318	0.978	0.983	2.38459484505151e-61
SNX31	1.42238514394028e-08	0.203288	0.392	0.355	0.00041848
FHOD3	1.37746969081048e-24	0.20315	0.809	0.803	4.05265357733351e-20
DENND3	1.3172195557279e-12	0.203003	0.677	0.662	3.87539165490704e-08
SGCD	4.38937185040296e-26	0.202929	0.792	0.771	1.29139709210706e-21
FIG4	3.85638770817538e-21	0.202898	0.701	0.69	1.13458782762228e-16
DHX34	1.35499095578309e-08	0.20283	0.303	0.267	0.000398652
AC007388.1	2.71224401302955e-109	0.202769	0.87	0.9	7.97969311073423e-105
MYSM1	2.92417622423469e-28	0.202476	0.788	0.793	8.60321886932087e-24
MEST	5.85482633867513e-07	0.202419	0.48	0.452	0.0172255
SAT1	1.16279487417268e-08	0.202317	0.5	0.471	0.000342106
SND1	1.6621138198071e-62	0.202317	0.863	0.881	4.89010506925448e-58
ADAM32	5.96093927735732e-09	0.202057	0.546	0.514	0.000175377
RPL37A	1.18490371846804e-12	0.201847	0.664	0.653	3.48610523010481e-08
EEA1	3.08810966411064e-16	0.201231	0.705	0.702	9.0855274427799e-12
NCK2	1.36614490059588e-14	0.201186	0.695	0.676	4.01933491204314e-10
GPRASP1	1.89869649046667e-07	0.201013	0.575	0.551	0.00558615
PRSS23	4.21613202768925e-08	0.200802	0.405	0.367	0.00124043
ADAM23	4.05748898005438e-102	0.200713	0.934	0.955	1.1937538328218e-97
ERI3	5.56130132838207e-23	0.200683	0.717	0.703	1.63619046382329e-18
ZBTB46	2.66163460895694e-14	0.200636	0.601	0.557	7.83079518301222e-10
CLSTN3	9.50964428173567e-19	0.200455	0.705	0.686	2.79783244412945e-14
RECK	1.76564795828062e-13	0.200365	0.642	0.626	5.19471285805742e-09
CCSER1	7.71003133506549e-147	0.200293	0.97	0.981	2.26836831908962e-142
EFR3B	6.16514877126338e-08	0.199718	0.629	0.608	0.00181385
EFCAB2	5.7385736936954e-11	0.199715	0.667	0.642	1.68834576642212e-06
URI1	3.26213710402067e-11	0.1996	0.695	0.67	9.59753357373921e-07
COX7A2L	5.01833316835315e-13	0.199489	0.648	0.636	1.47644380146118e-08
MYO6	1.62670989084767e-32	0.199483	0.846	0.851	4.78594316986294e-28
LRRC9	5.63598439273053e-09	0.199292	0.414	0.373	0.000165816
STX3	3.09263679016235e-10	0.199187	0.59	0.552	9.09884670033664e-06
CLHC1	4.40345725495266e-07	0.198801	0.444	0.414	0.0129554
PDK2	8.6188611354952e-09	0.198699	0.306	0.269	0.000253576
PUS7	6.56292107360859e-09	0.198425	0.614	0.592	0.000193088
TAF4B	2.16973037719664e-07	0.198333	0.6	0.569	0.00638356
CDON	1.7121325144094e-16	0.197913	0.705	0.685	5.03726507064388e-12
MGST1	6.32813755090262e-20	0.197663	0.556	0.493	1.86180134885106e-15
AC117834.1	1.71654272874902e-09	0.197582	0.204	0.171	5.05024036225248e-05
NUCB2	2.24237641186475e-07	0.197428	0.614	0.592	0.0065973
CHKA	2.53119643943169e-12	0.197272	0.673	0.66	7.44703304445198e-08
TTC8	6.11546344733469e-12	0.19708	0.662	0.658	1.79923050084034e-07
PLGLB1	4.24050775804103e-08	0.196943	0.535	0.506	0.0012476
TPCN1	1.64537127121404e-10	0.196882	0.495	0.453	4.84084681703882e-06
R3HCC1L	4.09416654672031e-07	0.196778	0.554	0.528	0.0120454
FARS2	4.14530335455897e-115	0.19664	0.892	0.93	1.2195896999448e-110
MBD1	2.82596718290212e-07	0.196088	0.347	0.313	0.00831428
SLC45A4	7.83461006304386e-08	0.195957	0.553	0.523	0.00230502
CFAP36	1.6175028817936e-09	0.195884	0.629	0.607	4.75885522852494e-05
JAK1	2.88033043357804e-10	0.195826	0.668	0.651	8.47422016862996e-06
FAM153C	4.86830729411807e-19	0.195804	0.708	0.694	1.43230468900248e-14
LRRC4C	1.95561148231447e-81	0.195785	0.952	0.963	5.75360454211739e-77
CCDC102B	2.55834913086905e-12	0.195716	0.651	0.613	7.52691897792984e-08
CTTN	4.6776959575529e-29	0.19541	0.754	0.749	1.37622492767164e-24
AL591501.1	6.00319877666127e-10	0.195277	0.648	0.636	1.76620111208151e-05
AP3M2	1.10261453157296e-07	0.195268	0.384	0.348	0.003244
CCKBR	1.64420805076322e-08	0.194766	0.186	0.156	0.000483742
C2orf72	7.95261030559089e-13	0.19456	0.571	0.539	2.33973747800789e-08
PNMA3	3.83576254804781e-11	0.194539	0.443	0.399	1.12851969926115e-06
AC005165.1	2.60309882024367e-09	0.194416	0.161	0.134	7.65857703903892e-05
TLE3	6.14371427364362e-08	0.194241	0.234	0.201	0.00180754
NUP93	9.28869100097769e-17	0.1942	0.704	0.687	2.73282577939765e-12
SEC16B	2.06820362291468e-07	0.193884	0.377	0.341	0.00608486
STXBP5-AS1	8.25678745619104e-31	0.1937	0.812	0.811	2.42922943748597e-26
ATP6AP1L	8.68755321614308e-07	0.193654	0.582	0.564	0.0255597
ZNF804B	1.08785679496538e-45	0.193397	0.689	0.598	3.20058347646763e-41
RILPL2	2.18386974480597e-09	0.193212	0.244	0.21	6.42516317619363e-05
TAF3	1.21655699461585e-06	0.193109	0.616	0.607	0.0357923
LNPK	7.15356524277806e-07	0.193036	0.652	0.629	0.0210465
VIPR2	4.32881740979713e-22	0.192916	0.143	0.105	1.27358137013641e-17
ZNF827	8.51081288940378e-16	0.192773	0.724	0.726	2.50396626019149e-11
RIC1	2.57893511824983e-13	0.192674	0.683	0.677	7.58748501140283e-09
FTCD	8.41211055931469e-07	0.192659	0.279	0.248	0.0247493
CFAP69	7.3420487655891e-13	0.192356	0.608	0.595	2.16010416732397e-08
C2CD2	1.48324188365013e-06	0.192175	0.487	0.456	0.0436385
WDR27	3.68202959788305e-13	0.192168	0.679	0.66	1.08328992799317e-08
FBXO34	8.87495535875295e-46	0.1921	0.861	0.871	2.6111006160987e-41
ALG13	3.68744603322595e-12	0.191648	0.697	0.684	1.08488349743541e-07
ADCY1	1.3795929916523e-51	0.191462	0.862	0.873	4.05890054074024e-47
PKDCC	4.90496894458313e-10	0.191295	0.336	0.295	1.4430909131858e-05
CERKL	2.62346087092889e-10	0.191144	0.168	0.14	7.71848422835988e-06
RASSF5	5.07183757144612e-07	0.191052	0.32	0.287	0.0149219
MRPS25	3.14471002837916e-09	0.19104	0.536	0.5	9.25205137449433e-05
COG7	2.6094030305577e-07	0.190989	0.587	0.569	0.00767712
NEIL1	2.02993485788089e-07	0.190978	0.349	0.314	0.00597227
AAGAB	6.23824821919074e-09	0.190943	0.596	0.583	0.000183536
PLA2G16	5.73651755418801e-14	0.1907	0.193	0.154	1.68774082961766e-09
FMNL3	1.73599572169849e-11	0.190411	0.416	0.37	5.10747301280913e-07
XRRA1	6.98661720270896e-07	0.190294	0.604	0.577	0.0205553
PDIA5	7.88191319961698e-08	0.190196	0.346	0.31	0.00231894
WNT3	2.1746545976633e-08	0.189903	0.27	0.236	0.000639805
MTG2	5.45121919645506e-08	0.189271	0.422	0.384	0.0016038
TUB	2.74565120638478e-07	0.189225	0.585	0.559	0.00807798
LMBR1L	9.43634159397274e-08	0.188934	0.355	0.322	0.00277627
C4orf47	2.58421048756148e-07	0.188931	0.465	0.432	0.00760301
NME7	1.19421940588593e-35	0.188922	0.847	0.859	3.51351291405699e-31
TYW1B	9.0689259534313e-10	0.188749	0.655	0.633	2.66816870475902e-05
PPP1R12A	1.65547768771259e-92	0.188701	0.904	0.929	4.8705809050192e-88
RUNX1	1.01617516278881e-12	0.188684	0.35	0.303	2.98968894644097e-08
AC016705.2	4.02935998465933e-08	0.188676	0.249	0.215	0.00118548
CMTM4	4.54657611926228e-21	0.188669	0.74	0.736	1.33764816004816e-16
EXOC1	3.30462951389191e-09	0.188312	0.661	0.649	9.72255049282139e-05
DLEU2	1.09026846877576e-22	0.188308	0.772	0.747	3.20767886198517e-18
ACTR3B	5.83308236682049e-16	0.188008	0.721	0.718	1.71615116314226e-11
CTDSPL	5.43245503010728e-67	0.187728	0.883	0.9	1.59828259440786e-62
SMAD1	1.6291560730747e-07	0.187547	0.617	0.601	0.00479314
SPATA7	4.85624729514716e-15	0.186889	0.743	0.741	1.42875651670525e-10
TSPAN13	1.5918918134314e-07	0.186887	0.622	0.598	0.0046835
ASAH1	1.33933225851193e-10	0.186734	0.533	0.489	3.94044943776796e-06
PPARG	1.52744247296405e-07	0.186287	0.462	0.426	0.00449389
RSU1	3.38696524831953e-08	0.186084	0.631	0.604	0.000996479
TAZ	3.52392990006117e-07	0.186052	0.376	0.342	0.0103678
ZSWIM8	5.18627299934382e-09	0.186028	0.515	0.479	0.000152585
LINC01551	6.1216219411019e-09	0.185954	0.577	0.567	0.000180104
MGAT5B	1.82643601911319e-16	0.185925	0.695	0.667	5.37355741183293e-12
EXOC4	1.07496655264546e-123	0.185919	0.928	0.961	3.1626590945382e-119
KPNA3	9.74714212197009e-13	0.185762	0.735	0.733	2.86770668370482e-08
ZNF169	1.59006430208758e-07	0.185737	0.336	0.3	0.00467813
KLHL23	7.44229473311472e-10	0.185702	0.646	0.642	2.18959753342968e-05
NAPEPLD	6.76172231776006e-21	0.184992	0.744	0.741	1.98936632310819e-16
IBTK	1.97212428058002e-23	0.18496	0.799	0.8	5.80218684589446e-19
ANKS3	2.19693943364002e-10	0.184859	0.569	0.541	6.46361550771232e-06
SPRED2	1.76755610489393e-14	0.1843	0.675	0.668	5.20032681620844e-10
AP3S1	4.03685610312889e-10	0.184019	0.715	0.705	1.18768343410155e-05
PTPN14	1.43330263298293e-06	0.18337	0.502	0.468	0.0421692
SCFD1	1.22463404096342e-25	0.183176	0.812	0.817	3.60299581191848e-21
PAK1	1.03667836212472e-72	0.182936	0.882	0.903	3.05001140920713e-68
ZNF76	1.68957665295066e-09	0.182861	0.396	0.355	4.97090347064615e-05
GABRA6	8.6243709724448e-09	0.182836	0.308	0.271	0.000253738
PSMB7	2.90341131220957e-07	0.182576	0.586	0.557	0.00854213
AL136317.2	1.09868544089249e-08	0.182575	0.512	0.475	0.000323244
BTAF1	2.47787949273244e-18	0.182477	0.754	0.753	7.29016925556812e-14
AC002383.1	5.34629336319388e-07	0.182398	0.138	0.116	0.0157293
MTERF4	3.1324269286765e-10	0.182357	0.477	0.436	9.21591326685914e-06
DNHD1	5.98509418922475e-07	0.182115	0.486	0.453	0.0176087
C7orf50	4.56163676462744e-09	0.181813	0.612	0.588	0.000134208
GDA	4.76189139989864e-19	0.18162	0.765	0.727	1.40099606876418e-14
C12orf4	1.30509954574583e-09	0.181551	0.594	0.562	3.83973337353882e-05
NSG2	3.00987222475949e-08	0.180956	0.673	0.647	0.000885535
CCND2	1.75917545960275e-07	0.17995	0.648	0.639	0.00517567
SDHA	5.31756687855314e-07	0.179949	0.549	0.532	0.0156448
DAB1	1.15610924294975e-37	0.179889	0.904	0.89	3.40138900368245e-33
CTNND1	6.45907844467409e-07	0.17974	0.538	0.515	0.0190033
KLHL42	1.6829254239452e-06	0.178997	0.609	0.59	0.0495133
HDAC7	2.8474440500793e-08	0.17864	0.382	0.343	0.000837747
SYNE1	3.23399078204151e-102	0.178506	0.96	0.979	9.51472427984432e-98
CDK5RAP3	9.57327469686002e-18	0.177575	0.278	0.226	2.81655314856319e-13
NFATC3	3.19450399495147e-09	0.177497	0.663	0.642	9.39855020354673e-05
DHX9	2.20914651732375e-09	0.177338	0.653	0.637	6.49952996861822e-05
TARBP1	6.46114864431408e-60	0.17733	0.875	0.898	1.90093454264365e-55
NEURL1	1.93042909891194e-09	0.177298	0.665	0.652	5.67951545190883e-05
SGTB	4.86584533240912e-08	0.177203	0.589	0.567	0.00143158
CUL9	4.41434597198933e-08	0.177021	0.408	0.375	0.00129874
RAB40B	4.22816510979371e-10	0.17695	0.569	0.546	1.24396845695241e-05
SH3BGRL2	1.05488332511635e-28	0.176904	0.818	0.819	3.1035722308248e-24
VEZT	5.2606548241308e-44	0.176781	0.857	0.876	1.54773725580752e-39
LRRK1	1.81158983758166e-11	0.176669	0.642	0.62	5.32987846114899e-07
CATSPERG	8.43053369610227e-07	0.176084	0.188	0.163	0.0248035
HNRNPL	1.26405685192991e-08	0.175833	0.551	0.51	0.000371898
NOL10	4.16520662187751e-16	0.175701	0.745	0.742	1.22544544022258e-11
TNPO3	3.16425034893281e-11	0.175602	0.681	0.678	9.30954095159521e-07
KIAA1549	1.64855291204701e-23	0.175321	0.798	0.8	4.8502075225335e-19
JADE1	1.18251416703873e-06	0.174882	0.448	0.418	0.0347907
MPPED2	1.87218156326648e-13	0.174706	0.733	0.709	5.5081453772863e-09
LCORL	1.09305730615463e-10	0.174573	0.7	0.702	3.21588390043753e-06
MRPL23	1.38582694090295e-09	0.174543	0.158	0.13	4.07724144283058e-05
ELMO1	3.4740407818496e-59	0.174376	0.853	0.877	1.02209753842797e-54
NT5DC3	7.11147011951138e-11	0.174319	0.595	0.551	2.09226562386144e-06
NPIPB5	7.20978615610078e-09	0.174305	0.726	0.713	0.000212119
KDM3A	3.60911791446415e-07	0.174136	0.46	0.424	0.0106184
TMEM266	3.9451696026117e-07	0.173732	0.544	0.511	0.0116071
LMF2	1.0197114072581e-11	0.173438	0.185	0.149	3.00009293129406e-07
CMC2	1.31008902576706e-13	0.173345	0.684	0.673	3.85441292270927e-09
JAKMIP1	8.87491444234494e-38	0.173183	0.82	0.827	2.6110885780823e-33
PPP2R2A	6.59778345944967e-30	0.172751	0.798	0.807	1.94113387160469e-25
ST8SIA5	3.2830036187435e-20	0.172078	0.806	0.805	9.65892494670525e-16
ANKRD34C-AS1	1.53304741235318e-18	0.171602	0.756	0.748	4.51037879188428e-14
RHCG	5.33203180955497e-07	0.171403	0.183	0.157	0.0156874
WASHC1	2.35196635732818e-16	0.171328	0.669	0.662	6.91972021989522e-12
NDUFV1	4.76645833204934e-10	0.171037	0.399	0.356	1.40233970587224e-05
POC1B-AS1	2.11185140574374e-09	0.171014	0.391	0.35	6.21327802083866e-05
THSD7A	1.17688346316294e-06	0.170417	0.403	0.369	0.0346251
TAF1D	1.66001512384874e-19	0.169651	0.805	0.814	4.88393049587538e-15
RNF103-CHMP3	5.41186916507348e-07	0.169513	0.329	0.296	0.0159223
KTN1	5.59016980832228e-20	0.169338	0.824	0.835	1.6446838593065e-15
PLCL2	1.05907483972131e-39	0.169309	0.863	0.883	3.11590408594407e-35
PTCHD4	1.77791907306754e-09	0.169308	0.482	0.439	5.230815704872e-05
NEK11	2.60645862590505e-11	0.169173	0.729	0.718	7.66846192327524e-07
POU2F2	1.16938377765896e-07	0.168685	0.513	0.477	0.00344044
RASA3	2.16244377209617e-12	0.168352	0.589	0.542	6.36212582188414e-08
MINDY3	1.41632867969719e-18	0.168332	0.739	0.745	4.16698060853711e-14
GRM7	1.27408356675121e-41	0.168275	0.918	0.904	3.74848126173874e-37
AIG1	5.75732690318852e-50	0.168116	0.879	0.899	1.69386314818709e-45
SNRNP70	5.93741456202186e-33	0.167992	0.783	0.771	1.74684673829245e-28
CDH13	7.66561253021645e-39	0.167722	0.772	0.7	2.25529986251498e-34
TMEM232	2.75815132872797e-65	0.167584	0.917	0.939	8.11475702425056e-61
GNPTAB	2.64806675984702e-13	0.167384	0.759	0.749	7.7908772141459e-09
IFT27	2.15283852286476e-09	0.167357	0.189	0.158	6.33386621812042e-05
METTL24	3.20749608644491e-08	0.167143	0.379	0.342	0.000943677
REEP1	5.30399123341296e-20	0.166684	0.791	0.796	1.56048726078243e-15
METTL17	1.94282163806541e-09	0.166659	0.196	0.163	5.71597554135225e-05
SCAI	6.72865006374498e-90	0.16627	0.888	0.918	1.97963613525441e-85
MALT1	1.23406140392218e-10	0.166242	0.693	0.683	3.63073205647945e-06
CACNB4	2.09342067656539e-40	0.165935	0.764	0.797	6.15905297252304e-36
CMSS1	1.15774263458249e-37	0.165792	0.87	0.885	3.40619460520515e-33
CDC40	2.27484761483183e-11	0.16563	0.742	0.745	6.69282916759673e-07
MTMR7	2.21190615405223e-25	0.165217	0.787	0.799	6.50764909583707e-21
DYNC2H1	6.53152801736902e-40	0.165174	0.881	0.902	1.92164085799014e-35
BEX2	2.88529774830208e-07	0.165134	0.434	0.405	0.00848883
AC007566.1	1.03633497833952e-06	0.165001	0.549	0.52	0.03049
CHCHD3	3.39193859096141e-60	0.164721	0.869	0.898	9.97942252846757e-56
SIL1	4.78250851958377e-26	0.164519	0.802	0.807	1.40706183154674e-21
AC063944.1	1.07114803035758e-13	0.164496	0.268	0.231	3.15142462011504e-09
TCERG1L	3.30943153468483e-09	0.164443	0.612	0.594	9.73667851819624e-05
HIC2	6.59840993138145e-19	0.164403	0.714	0.712	1.94131818591174e-14
GALNT17	1.73775950013701e-102	0.16439	0.937	0.965	5.11266222535308e-98
SBK1	7.27489212560029e-08	0.163942	0.293	0.258	0.00214035
DYSF	1.36224635491931e-09	0.163884	0.516	0.478	4.0078650008081e-05
TFDP2	2.78556583397457e-34	0.16383	0.884	0.907	8.19541324013657e-30
TCAIM	6.15811314153729e-09	0.163748	0.645	0.63	0.000181178
MAP4K4	6.31479973902125e-61	0.163662	0.881	0.903	1.85787723121744e-56
SYP	4.57474899364041e-23	0.163482	0.795	0.802	1.34593690141894e-18
IGSF11	7.46113983273311e-10	0.162992	0.753	0.74	2.19514195018841e-05
CHD6	2.26394748352837e-65	0.162481	0.867	0.899	6.66075989128882e-61
SOBP	9.1728855186508e-54	0.162363	0.9	0.927	2.69875464844225e-49
SFPQ	1.60848061655333e-18	0.162244	0.839	0.847	4.73231082196155e-14
SEZ6L	3.44552340552643e-34	0.162217	0.871	0.898	1.01370744113993e-29
FAM66C	2.78307591994049e-16	0.162185	0.731	0.736	8.18808766405692e-12
SNAI3-AS1	2.05404777150226e-08	0.161923	0.325	0.288	0.000604321
ARFIP1	1.61262400709305e-06	0.161892	0.668	0.659	0.047445
AC008667.1	2.88674686902749e-07	0.161582	0.103	0.086	0.0084931
SPATS2L	8.32383636674576e-30	0.161458	0.813	0.821	2.44895589746027e-25
AC011474.2	1.85477639914906e-07	0.161417	0.327	0.292	0.00545694
UNC13B	1.26445036223115e-07	0.16128	0.655	0.644	0.00372014
LAMC1	1.06859864596846e-10	0.161123	0.615	0.609	3.14392407630379e-06
MIAT	1.64408545664488e-99	0.161101	0.86	0.912	4.8370638219949e-95
CARNMT1	3.39094631171631e-07	0.161044	0.648	0.637	0.0099765
RMND5A	4.47868700285691e-07	0.160758	0.66	0.647	0.0131767
ABCB8	1.39201003206219e-07	0.160715	0.354	0.318	0.00409543
EFCAB6	9.66759950932193e-09	0.160018	0.64	0.629	0.00028443
BABAM2	1.21259667076031e-64	0.159341	0.883	0.914	3.5675806650439e-60
AMPD3	2.3996306630433e-12	0.158682	0.315	0.271	7.05995337373969e-08
PUM3	5.91780152382481e-25	0.158571	0.809	0.822	1.7410763863245e-20
LPP	2.2193974506071e-35	0.158524	0.689	0.731	6.52968923943114e-31
RPS6KA6	8.74442091276125e-10	0.158297	0.704	0.695	2.57269607674349e-05
KIAA0319L	3.03809804161714e-27	0.15791	0.788	0.805	8.9383882482418e-23
GRB10	2.50711242062045e-22	0.157839	0.773	0.783	7.37617545270742e-18
BCKDHB	2.97436175475847e-08	0.157568	0.717	0.712	0.000875087
NEBL	5.96960407505806e-54	0.157354	0.933	0.955	1.75631721492283e-49
ITPR1	4.01919733053527e-68	0.157225	0.913	0.943	1.18248804661678e-63
KIRREL3	7.7307657099603e-23	0.157025	0.847	0.823	2.27446857952742e-18
PTCHD1-AS	2.01713184090521e-09	0.15699	0.677	0.655	5.93460358912723e-05
BMS1P14	1.46946081512335e-12	0.156718	0.536	0.487	4.32330066417441e-08
ANAPC1	1.00108657714527e-10	0.156583	0.71	0.705	2.94529681861911e-06
PPP1R21	1.51330180561709e-23	0.156374	0.758	0.768	4.45228524230604e-19
AC069437.1	2.80290081672598e-20	0.156294	0.528	0.47	8.24641449288951e-16
FAM13B	4.72341907788082e-28	0.156276	0.83	0.841	1.38967712690332e-23
KCNH5	3.82596999340351e-08	0.155531	0.668	0.638	0.00112564
P2RX7	3.9195535655326e-10	0.155463	0.699	0.688	1.15317185451535e-05
DYNC2LI1	1.25376247779875e-09	0.155406	0.709	0.71	3.6886945859317e-05
RSRP1	1.00662908777535e-54	0.155231	0.83	0.855	2.96160343914385e-50
PPP6R3	3.39297032964195e-44	0.155125	0.851	0.87	9.98245800683958e-40
PLCL1	5.51310367397932e-32	0.155081	0.877	0.885	1.62201023192146e-27
ZC2HC1A	1.95492636053471e-09	0.155058	0.738	0.717	5.75158884532918e-05
RAPGEF5	2.98306697096422e-82	0.154625	0.945	0.973	8.77648133527384e-78
PHTF1	3.14059751318242e-08	0.154401	0.723	0.724	0.000923995
HNRNPC	1.85077560131229e-16	0.154156	0.8	0.81	5.4451668966209e-12
MICU1	6.19203319552885e-61	0.153628	0.888	0.913	1.82175808645654e-56
ESYT2	5.88072553999047e-28	0.153471	0.822	0.829	1.7301682611206e-23
ARMC9	3.16657587414086e-51	0.153275	0.857	0.886	9.31638287930984e-47
UQCC2	5.10797656490994e-07	0.153246	0.307	0.274	0.0150282
XRN2	4.89228305968401e-07	0.153198	0.646	0.644	0.0143936
SKAP2	1.7353099698512e-09	0.153027	0.705	0.689	5.10545546229921e-05
UBE3D	1.97676582342913e-20	0.152976	0.782	0.789	5.81584272911085e-16
CHORDC1	9.41643957715814e-09	0.15293	0.596	0.595	0.000277041
TNNT2	1.70444518385393e-09	0.152624	0.251	0.218	5.01464817541666e-05
GALNT11	7.99985897539737e-28	0.15249	0.834	0.845	2.35363850915166e-23
SLF1	4.6815125822619e-14	0.152426	0.775	0.777	1.37734781682727e-09
GARNL3	2.06329500803568e-34	0.152409	0.827	0.824	6.07042024314176e-30
CCNY	2.7401704652852e-52	0.152231	0.886	0.914	8.06185552591559e-48
ADGRL2	9.37763199582116e-22	0.152211	0.921	0.921	2.75899310949054e-17
CDH9	9.88459785737297e-07	0.152121	0.73	0.711	0.0290815
MTMR12	7.47316739169007e-16	0.152109	0.749	0.752	2.19868057830914e-11
TFCP2	2.66070826047329e-20	0.151925	0.764	0.777	7.82806977313847e-16
ANKDD1A	5.28641113434478e-07	0.151867	0.6	0.587	0.0155532
SLAIN1	7.83164434685481e-16	0.151668	0.79	0.797	2.30414808328815e-11
AC004076.1	3.63107740678728e-07	0.151603	0.585	0.55	0.010683
HACE1	4.39787550253901e-22	0.151487	0.814	0.823	1.293898951602e-17
SYT16	3.43729865965418e-100	0.151367	0.918	0.951	1.01128763865686e-95
KANSL1L	6.58165552744773e-07	0.151066	0.711	0.699	0.0193639
TBRG1	2.96979073669949e-07	0.15106	0.624	0.624	0.00873742
LMO7	2.75272071473593e-34	0.151049	0.864	0.887	8.09877961482457e-30
SRGAP3	2.18890839635185e-64	0.150748	0.911	0.935	6.43998739290676e-60
TYW1	7.01442520118429e-10	0.150424	0.709	0.707	2.06371403844043e-05
TBC1D22A	3.98314206899482e-23	0.150229	0.804	0.811	1.17188022811896e-18
FBXW4	4.39768479953591e-12	0.150189	0.725	0.733	1.29384284487146e-07
DZIP3	8.73999505175899e-40	0.150118	0.865	0.888	2.57139394417801e-35
DYNC1I2	7.85519926106248e-23	0.150056	0.815	0.828	2.31107817459719e-18
ZSWIM6	1.03604501677421e-45	0.150016	0.896	0.92	3.04814804385139e-41
TMEM260	2.95286553944193e-09	0.14982	0.736	0.736	8.68762570359211e-05
ASAP1	4.52511913266958e-83	0.149809	0.912	0.945	1.33133530002272e-78
PLXNA2	1.24576938297546e-44	0.149411	0.855	0.883	3.66517810165209e-40
TRPM7	1.68170993963339e-25	0.149318	0.832	0.849	4.94775881339539e-21
TMEM104	4.5365348904603e-07	0.149221	0.166	0.142	0.0133469
CALD1	1.18169449081147e-06	0.149184	0.664	0.633	0.0347666
ABTB1	3.47220630374979e-09	0.148993	0.285	0.25	0.000102156
RIC8B	2.00646279021069e-12	0.14896	0.765	0.771	5.90321417507886e-08
BMPR1A	2.27484819931363e-11	0.148603	0.726	0.72	6.69283088720063e-07
DOCK9	9.5379904669542e-31	0.148318	0.864	0.878	2.8061721752826e-26
BDH1	7.14579942562386e-08	0.148099	0.708	0.707	0.00210237
ORC4	5.57871411217824e-07	0.148079	0.748	0.739	0.0164131
RNF149	5.48087038372485e-13	0.148066	0.757	0.763	1.61252687559569e-08
ANKMY1	1.72341300673389e-08	0.147995	0.381	0.342	0.000507045
CERS6	6.98236394098343e-79	0.147977	0.918	0.949	2.05428129507674e-74
PDXDC1	2.48073158701103e-31	0.147587	0.834	0.858	7.29856040214516e-27
NSMCE2	5.76345002087004e-42	0.14758	0.853	0.878	1.69566463064017e-37
ANO3	1.28622211767214e-15	0.147434	0.825	0.814	3.78419409240319e-11
LUZP1	2.70957941671252e-16	0.147166	0.759	0.767	7.9718536019099e-12
LRRC6	2.32925919298475e-22	0.147138	0.739	0.746	6.85291347168044e-18
KIAA0319	6.97962343631309e-29	0.147105	0.768	0.802	2.05347501119767e-24
ACSF3	8.85466443724708e-07	0.146796	0.367	0.333	0.0260513
IFT172	2.34255050825797e-08	0.14673	0.694	0.687	0.000689202
RMDN2-AS1	1.73826627126884e-08	0.146603	0.184	0.156	0.000511415
MPG	1.65580564675139e-10	0.146484	0.206	0.173	4.87154579330726e-06
HIBCH	4.74095944714172e-18	0.14641	0.814	0.832	1.39483767894356e-13
PTPN1	1.89627986043329e-08	0.146405	0.708	0.704	0.000557904
ABCA5	5.45688638039914e-35	0.14622	0.872	0.891	1.60547054197723e-30
CEP57	2.59088479186728e-07	0.146001	0.681	0.679	0.00762264
CCDC85A	1.61298252125187e-27	0.145578	0.74	0.755	4.74555587577512e-23
PMS1	3.4019853980455e-08	0.145557	0.697	0.689	0.0010009
FASTKD1	1.28108383925783e-12	0.145476	0.724	0.726	3.76907676348046e-08
SMARCA2	1.52079314546234e-57	0.145408	0.895	0.921	4.47432551326476e-53
RPS27	2.88054078371447e-16	0.145376	0.11	0.078	8.47483903976635e-12
PAXIP1-AS1	2.88234723250049e-07	0.145321	0.145	0.12	0.00848015
TOGARAM1	3.59290293215111e-14	0.145059	0.795	0.799	1.05706797166818e-09
PPM1K	5.94086309218061e-10	0.144817	0.783	0.773	1.74786133035046e-05
RBMS1	1.76520526170252e-09	0.144435	0.715	0.678	5.19341040045499e-05
GRIN2A	1.33662487699107e-118	0.144432	0.955	0.973	3.93248405059543e-114
LINC02223	6.25188218688832e-08	0.144195	0.62	0.585	0.00183937
SCN1A	5.45353187665783e-36	0.144079	0.919	0.913	1.6044836134315e-31
CDK19	4.59085653722887e-29	0.144003	0.773	0.791	1.3506759018181e-24
DLGAP3	1.8980654354544e-08	0.143857	0.613	0.618	0.00055843
SUGP2	4.35259710724001e-28	0.14362	0.826	0.841	1.28057759492108e-23
RCAN1	1.09727799319269e-07	0.143447	0.505	0.469	0.0032283
KCNC2	1.6162318200216e-24	0.143389	0.869	0.883	4.75511563768556e-20
NTM	3.53398870249538e-21	0.143111	0.884	0.88	1.03973481616117e-16
MSI2	6.23505865358388e-11	0.143081	0.761	0.778	1.83441660647091e-06
DDX10	3.93199094268342e-12	0.142794	0.781	0.789	1.15683105524689e-07
NLK	3.6406319444704e-67	0.142762	0.904	0.929	1.07111032438264e-62
DIS3L2	1.07213199170122e-22	0.14274	0.822	0.843	3.15431953278416e-18
LRRFIP1	1.79307175672575e-60	0.142592	0.889	0.917	5.27539641546282e-56
KLHL32	4.29290480956707e-16	0.14225	0.824	0.82	1.26301552402273e-11
PDHX	1.51741339075543e-12	0.14187	0.752	0.764	4.46438193694154e-08
GALNT13	6.14681026135547e-15	0.141547	0.725	0.726	1.80845304699339e-10
CCDC91	1.08117892199237e-17	0.141277	0.86	0.875	3.18093650639376e-13
SLC6A17	1.57262019372028e-06	0.141114	0.669	0.652	0.0462681
AC004817.1	1.0848217720032e-07	0.140925	0.107	0.089	0.00319165
VGLL4	7.0174827397305e-36	0.140917	0.849	0.872	2.06461359685611e-31
KATNBL1	2.4316974457549e-22	0.140915	0.77	0.783	7.15429705515548e-18
GGT7	3.98810591042774e-12	0.140787	0.7	0.677	1.17334063990695e-07
UBE3A	1.07957313251512e-20	0.140646	0.86	0.865	3.17621211317272e-16
LRRK2	1.56463392085103e-11	0.14061	0.737	0.745	4.60330945853581e-07
KCNT1	8.30797375940989e-12	0.140309	0.728	0.719	2.44428895975598e-07
RAD18	1.75901822183237e-07	0.140245	0.674	0.657	0.00517521
MRPS30-DT	4.30496173404382e-12	0.140244	0.778	0.776	1.26656279177303e-07
CEP126	1.15141551610997e-25	0.14015	0.864	0.865	3.38757958994715e-21
CGREF1	1.14005281164246e-06	0.140026	0.31	0.278	0.0335415
TCF12	1.54843428348606e-11	0.139801	0.816	0.832	4.55564850544433e-07
DCAF5	2.25672533319307e-18	0.139674	0.778	0.794	6.63951160278733e-14
GRAMD1B	7.87474833009641e-24	0.139673	0.823	0.841	2.31682970619766e-19
RGS6	1.08305119898067e-42	0.139623	0.869	0.869	3.18644493252103e-38
CDK5RAP2	1.89020207866499e-10	0.139474	0.711	0.711	5.56116353564027e-06
ECPAS	7.68440304687055e-25	0.139473	0.843	0.865	2.26082822041978e-20
BTBD10	1.12673674666874e-11	0.139398	0.823	0.824	3.31497218237411e-07
MBTPS1	2.20566952664024e-11	0.139047	0.738	0.74	6.48930031432825e-07
KCNN3	9.88901823471668e-12	0.13846	0.47	0.424	2.90944805483599e-07
PPP2R2C	6.12462361439225e-107	0.138417	0.918	0.957	1.80192551359035e-102
PCMTD1	1.07569721621391e-24	0.138229	0.838	0.854	3.16480877982294e-20
NMD3	1.84964362823778e-08	0.138167	0.707	0.709	0.000544184
CLVS1	1.20528522350298e-17	0.137861	0.82	0.837	3.54606965606811e-13
MAGED1	3.94542743340912e-08	0.13782	0.735	0.731	0.00116078
CTNNBL1	1.08743271750824e-06	0.137707	0.601	0.581	0.0319934
SYNDIG1	5.76979769504729e-20	0.137676	0.837	0.846	1.69753217985986e-15
XPR1	6.54818601185299e-17	0.137534	0.812	0.82	1.92654180654727e-12
CPNE4	3.35927760029521e-10	0.137466	0.706	0.717	9.88333062782855e-06
ROCK2	4.08292062581413e-62	0.13746	0.915	0.943	1.20123607732078e-57
SNX32	1.75610868362659e-11	0.137048	0.726	0.728	5.16664735809779e-07
AC026458.2	1.29104970500989e-06	0.13698	0.196	0.172	0.037984
NPHP4	1.20688227300132e-09	0.13685	0.634	0.637	3.55076833539718e-05
TRIM11	1.44633408080619e-06	0.136695	0.257	0.228	0.0425526
ATR	8.66433396377608e-13	0.136356	0.788	0.799	2.54913369548256e-08
ERC1	6.64957663123716e-63	0.136235	0.921	0.952	1.95637194067629e-58
SLC38A10	2.29363636700693e-14	0.135708	0.331	0.282	6.7481075553711e-10
DNM1L	1.34686208937951e-12	0.135696	0.814	0.825	3.96260295316345e-08
GGA2	2.08014523211239e-17	0.135611	0.73	0.729	6.11999528739787e-13
ACSL3	1.55942653368393e-15	0.13555	0.805	0.813	4.5879888047515e-11
MSRA	5.23666148066245e-121	0.135133	0.948	0.977	1.5406781742257e-116
MSH3	1.97562583789927e-09	0.135101	0.782	0.785	5.81248877768344e-05
HTT	1.37608580076219e-46	0.134958	0.843	0.874	4.04858203442243e-42
RIMBP2	1.20337545351203e-50	0.134233	0.877	0.905	3.54045092177775e-46
CNTNAP5	1.71446212815398e-44	0.13385	0.918	0.922	5.04411902724183e-40
RAB29	2.26260045055574e-07	0.133542	0.122	0.1	0.0066568
HECW2	1.51625308361967e-90	0.13349	0.926	0.961	4.46096819731743e-86
LMTK2	3.60421918213614e-46	0.132917	0.858	0.887	1.06039732557627e-41
ATL2	1.70054971907464e-07	0.132867	0.714	0.71	0.00500319
FUT8	6.59263989676437e-26	0.132862	0.852	0.872	1.93962058402705e-21
USP15	5.23403359362048e-19	0.13257	0.829	0.851	1.53990502357908e-14
MAP2K5	2.61283131679749e-65	0.132277	0.89	0.925	7.6872110171499e-61
GPBP1	1.31473233367392e-15	0.132216	0.821	0.833	3.86807399890205e-11
TNPO1	1.5761084202567e-29	0.132194	0.87	0.888	4.63706858323723e-25
LRFN2	4.04140004741345e-32	0.132092	0.861	0.883	1.18902030794951e-27
CEP192	1.41760578774196e-22	0.131995	0.83	0.847	4.17073798811563e-18
RBFOX2	1.84704722300661e-98	0.131934	0.925	0.957	5.43419763480774e-94
THRB	1.79790271426483e-69	0.131784	0.94	0.972	5.28960957563855e-65
GRK3	1.00403870142851e-18	0.131489	0.86	0.878	2.95398226347283e-14
AC124319.2	1.46094533243691e-10	0.131437	0.739	0.738	4.29824726256264e-06
R3HDM1	4.21792765798377e-84	0.131348	0.96	0.979	1.2409564962554e-79
ST7	1.02974583721865e-66	0.130825	0.902	0.938	3.029615227681e-62
EPB41L5	6.50479355611577e-08	0.130724	0.714	0.718	0.00191378
PLEKHM3	6.14549348948192e-31	0.130422	0.846	0.875	1.80806563954048e-26
TRIM44	7.14921039892822e-31	0.130335	0.864	0.883	2.10336919146867e-26
SUSD4	1.70520847410662e-19	0.130331	0.804	0.816	5.01689385166907e-15
CEP295	1.33722182075583e-07	0.130309	0.705	0.718	0.00393424
PITPNM2	1.23405435921781e-15	0.129819	0.746	0.754	3.63071133025471e-11
SELENOO	1.47319996583995e-06	0.129639	0.637	0.609	0.043343
RNF175	1.63068868947267e-11	0.129421	0.739	0.736	4.79764919329754e-07
EPB41L3	1.73661443203047e-63	0.12937	0.899	0.933	5.10929332047685e-59
ZNF532	4.98222900674575e-28	0.129117	0.851	0.874	1.46582159607467e-23
RAI1	3.06269296858447e-08	0.129076	0.653	0.651	0.000901075
POLR2F	9.95075226253436e-07	0.129039	0.506	0.47	0.0292761
N4BP2L2	1.87303932739114e-83	0.128957	0.937	0.967	5.51066900511746e-79
CCPG1	2.46037397609252e-59	0.128815	0.899	0.935	7.23866627506181e-55
TMEM150C	1.27523993318529e-08	0.128716	0.604	0.618	0.000375188
TMEM178B	9.54874088171914e-63	0.128365	0.935	0.961	2.80933505481059e-58
CCNT2	6.5691688748467e-07	0.128353	0.724	0.725	0.0193272
SPECC1	1.80844459251151e-35	0.12833	0.833	0.861	5.3206248356281e-31
CABP1	2.64147284846694e-89	0.128069	0.895	0.937	7.77147726747458e-85
FBXO16	9.58723662041265e-10	0.127769	0.7	0.702	2.8206608860916e-05
ATP2B2	1.13498242850302e-86	0.127763	0.93	0.962	3.33923180289874e-82
KCND2	1.73006232619077e-24	0.127489	0.925	0.924	5.09001636988587e-20
LINC00632	2.49877953646799e-99	0.127481	0.914	0.955	7.35165927424247e-95
AP000943.3	3.18130272005725e-09	0.127171	0.451	0.413	9.35971073268044e-05
ZCCHC2	1.34432258538991e-06	0.127078	0.672	0.666	0.0395513
HEATR5B	1.09320761832305e-07	0.127037	0.697	0.708	0.00321633
MGA	2.13010072143718e-10	0.12696	0.784	0.795	6.26696933254032e-06
USP28	1.40025562089382e-06	0.126742	0.678	0.67	0.0411969
SLC8A1-AS1	3.16952740753922e-14	0.126628	0.506	0.457	9.32506658572113e-10
FAM66B	3.74499533531343e-07	0.12662	0.323	0.293	0.0110182
SENP2	1.08585925248002e-09	0.126004	0.657	0.663	3.19470650672146e-05
PLEKHA6	3.20353863531747e-44	0.125981	0.863	0.889	9.42513101896753e-40
THRAP3	3.42445857056411e-11	0.125858	0.735	0.743	1.00750995604567e-06
AC118549.1	1.33678218502354e-12	0.12582	0.815	0.831	3.93294686655775e-08
NUMB	1.17566137599083e-15	0.125762	0.824	0.835	3.45891333430262e-11
DLGAP2	7.29598671719881e-91	0.125723	0.964	0.981	2.14655225206706e-86
PCP4	6.53467447814281e-07	0.125496	0.219	0.191	0.0192257
ARHGEF9	2.37422497104196e-20	0.125269	0.832	0.852	6.98520728730254e-16
SERGEF	2.77115553122913e-25	0.124888	0.817	0.835	8.15301668842923e-21
MAP3K2	5.12272712772999e-19	0.124748	0.806	0.82	1.50715754824944e-14
ARHGEF12	2.52028088412906e-59	0.124687	0.911	0.941	7.4149183891961e-55
PRKAA2	2.12604856458548e-10	0.124376	0.774	0.78	6.25504748186695e-06
EVI5	5.41545693733396e-21	0.124205	0.865	0.88	1.59328158553302e-16
DDX5	1.03635168484001e-23	0.124139	0.83	0.859	3.04905029196779e-19
TSPOAP1	2.53187205024143e-07	0.124093	0.584	0.559	0.00744902
NBEAL1	9.48185367175372e-08	0.1239	0.76	0.772	0.00278966
CDH20	8.40479501700233e-51	0.123846	0.524	0.433	2.47277474195226e-46
XRCC5	3.01253147957662e-14	0.123846	0.789	0.809	8.86316886606239e-10
AHCYL2	2.99377877149754e-29	0.122681	0.849	0.875	8.8079965236229e-25
PPIP5K2	3.64446649110528e-11	0.122578	0.808	0.822	1.07223848634808e-06
ANO10	1.8992969576718e-10	0.122206	0.747	0.752	5.58792157916619e-06
TMEM132B	5.33994471680601e-97	0.121678	0.945	0.972	1.5710651351315e-92
CAMKK1	7.55959179915245e-08	0.121299	0.703	0.707	0.00222411
CMYA5	1.4756473078397e-08	0.121193	0.49	0.452	0.00043415
SPG11	4.04051261171969e-08	0.12108	0.714	0.716	0.00118876
UMAD1	5.53152806475391e-13	0.121025	0.812	0.821	1.62743087193125e-08
MGST3	1.42213557149332e-07	0.120745	0.713	0.715	0.00418407
MEG8	2.42996624598096e-13	0.120704	0.869	0.88	7.14920369230057e-09
RFTN1	2.70302757719153e-07	0.120436	0.734	0.728	0.00795258
SPIRE1	6.24319506592101e-43	0.120368	0.897	0.928	1.83681042034462e-38
COG5	6.45569429843012e-29	0.120057	0.87	0.898	1.89932981954113e-24
SLC25A26	1.21742279871087e-08	0.119618	0.712	0.711	0.000358178
MPDZ	2.00414221952132e-47	0.119358	0.9	0.931	5.89638682405369e-43
CSPP1	4.26598938212069e-16	0.119261	0.843	0.861	1.25509673611373e-11
KIAA1211L	7.58892187636338e-70	0.118762	0.886	0.925	2.23273670524487e-65
AC022858.1	7.81745239185866e-11	0.118286	0.139	0.117	2.29997266820874e-06
SNTB2	4.25116556144631e-07	0.117807	0.707	0.704	0.0125074
[truncated: 2,754 more rows]

## Sheet: Human IN markers
	p_val	avg_log2FC	pct.1	pct.2	p_val_adj	cluster	gene
MYO5B	0	3.36794	0.921	0.116	0	0	MYO5B
SULF1	0	4.36288	0.791	0.083	0	0	SULF1
CNTNAP3	0	2.45575	0.883	0.22	0	0	CNTNAP3
OPRD1	0	2.56749	0.777	0.141	0	0	OPRD1
EPB41	0	2.59812	0.85	0.215	0	0	EPB41
MYO1B	0	2.54024	0.811	0.188	0	0	MYO1B
CEMIP	0	3.32581	0.774	0.152	0	0	CEMIP
ADAMTS17	0	2.43907	0.932	0.317	0	0	ADAMTS17
RSPO2	0	2.00846	0.816	0.204	0	0	RSPO2
GRIK3	0	1.19502	0.921	0.314	0	0	GRIK3
TRPC5	0	1.89908	0.883	0.289	0	0	TRPC5
PLCL1	0	2.72122	0.924	0.331	0	0	PLCL1
PPARGC1A	0	2.36846	0.902	0.311	0	0	PPARGC1A
RGS5	0	3.18706	0.69	0.103	0	0	RGS5
KCNS3	0	2.45998	0.755	0.173	0	0	KCNS3
SLC26A4	0	2.3735	0.78	0.199	0	0	SLC26A4
ANKRD34C-AS1	0	1.85884	0.862	0.282	0	0	ANKRD34C-AS1
TMEM132C	0	2.37666	0.968	0.4	0	0	TMEM132C
ETV6	0	2.07973	0.916	0.35	0	0	ETV6
XYLT1	0	1.7801	0.887	0.323	0	0	XYLT1
NDST3	0	2.30089	0.926	0.364	0	0	NDST3
RNF144B	0	2.63552	0.665	0.105	0	0	RNF144B
AC010127.1	0	2.29292	0.925	0.366	0	0	AC010127.1
FAM19A4	0	1.99557	0.687	0.133	0	0	FAM19A4
AFF1	0	2.16191	0.774	0.221	0	0	AFF1
SAMD5	0	1.48579	0.896	0.344	0	0	SAMD5
ST8SIA4	0	1.91365	0.773	0.223	0	0	ST8SIA4
SLC4A4	0	1.71376	0.877	0.33	0	0	SLC4A4
SLC9A9	0	2.26304	0.937	0.393	0	0	SLC9A9
SOX6	0	1.4659	0.986	0.442	0	0	SOX6
RUNX2	0	1.90582	0.908	0.366	0	0	RUNX2
TRPC4	0	1.58904	0.919	0.378	0	0	TRPC4
PRKG1	0	2.06875	0.988	0.448	0	0	PRKG1
AL033504.1	0	1.44514	0.839	0.304	0	0	AL033504.1
ROR1	0	2.18854	0.708	0.177	0	0	ROR1
CNTNAP3B	0	2.17993	0.96	0.43	0	0	CNTNAP3B
PDGFC	0	2.63983	0.627	0.107	0	0	PDGFC
AC120193.1	0	3.09726	0.648	0.137	0	0	AC120193.1
AC090568.2	0	1.74278	0.811	0.302	0	0	AC090568.2
MYO16	0	1.04356	0.969	0.462	0	0	MYO16
TAC1	0	2.05735	0.587	0.082	0	0	TAC1
GHR	0	1.70067	0.814	0.309	0	0	GHR
PLCXD3	0	1.01171	0.876	0.373	0	0	PLCXD3
WIPF3	0	1.56005	0.748	0.254	0	0	WIPF3
MIR4435-2HG	0	1.60674	0.709	0.217	0	0	MIR4435-2HG
PLOD2	0	1.49905	0.723	0.234	0	0	PLOD2
AP000943.3	0	1.42722	0.808	0.323	0	0	AP000943.3
FAM78B	0	1.78654	0.905	0.422	0	0	FAM78B
SASH1	0	1.20596	0.77	0.287	0	0	SASH1
SLIT2	0	1.79212	0.986	0.504	0	0	SLIT2
SLIT1	0	0.973126	0.777	0.299	0	0	SLIT1
DPP10-AS3	0	3.52828	0.524	0.048	0	0	DPP10-AS3
GAS2	0	1.71225	0.811	0.34	0	0	GAS2
HGF	0	2.65356	0.538	0.068	0	0	HGF
MIR34AHG	0	2.3511	0.625	0.155	0	0	MIR34AHG
ZFPM2	0	1.39198	0.809	0.342	0	0	ZFPM2
TM6SF1	0	3.06984	0.536	0.07	0	0	TM6SF1
RAPGEF5	0	1.4359	0.944	0.481	0	0	RAPGEF5
FBLN7	0	1.54981	0.666	0.204	0	0	FBLN7
PPARG	0	1.43484	0.81	0.351	0	0	PPARG
SFMBT2	0	1.23717	0.854	0.396	0	0	SFMBT2
WIF1	0	1.83567	0.609	0.154	0	0	WIF1
CPLX1	0	1.65799	0.828	0.374	0	0	CPLX1
STXBP5-AS1	0	1.11083	0.849	0.397	0	0	STXBP5-AS1
SAT1	0	1.59206	0.772	0.323	0	0	SAT1
CUX2	0	2.38609	0.601	0.152	0	0	CUX2
RHOBTB3	0	1.38168	0.8	0.352	0	0	RHOBTB3
SPARCL1	0	1.80326	0.98	0.537	0	0	SPARCL1
FGFR2	0	2.09201	0.592	0.151	0	0	FGFR2
VAV3	0	1.41422	0.606	0.166	0	0	VAV3
LHX6	0	0.961125	0.671	0.232	0	0	LHX6
MPP7	0	1.48105	0.645	0.212	0	0	MPP7
FSTL4	0	1.18198	0.706	0.277	0	0	FSTL4
CDK6	0	1.22094	0.69	0.262	0	0	CDK6
CACNA2D2	0	1.25316	0.708	0.283	0	0	CACNA2D2
ADAMTS9-AS2	0	0.970475	0.932	0.508	0	0	ADAMTS9-AS2
GOLIM4	0	0.849124	0.678	0.256	0	0	GOLIM4
ANKRD18A	0	1.60354	0.561	0.141	0	0	ANKRD18A
AC008105.3	0	1.36778	0.656	0.237	0	0	AC008105.3
ZNF804A	0	1.75597	0.99	0.572	0	0	ZNF804A
CACNB4	0	1.71975	0.958	0.54	0	0	CACNB4
AC025809.1	0	1.14917	0.676	0.26	0	0	AC025809.1
SFXN5	0	1.40196	0.822	0.409	0	0	SFXN5
ADCY1	0	1.6984	0.921	0.509	0	0	ADCY1
LINC00894	0	1.33645	0.8	0.388	0	0	LINC00894
LINC02389	0	1.43563	0.882	0.47	0	0	LINC02389
DNAI1	0	2.68492	0.486	0.074	0	0	DNAI1
COL4A2	0	0.836561	0.685	0.275	0	0	COL4A2
LDB2	0	2.43528	0.795	0.385	0	0	LDB2
KCNAB3	0	1.54597	0.605	0.195	0	0	KCNAB3
DOCK11	0	1.14058	0.867	0.464	0	0	DOCK11
ST8SIA1	0	1.4282	0.916	0.514	0	0	ST8SIA1
HTR4	0	2.07736	0.51	0.11	0	0	HTR4
OSBPL10	0	1.33388	0.912	0.514	0	0	OSBPL10
TMEM178A	0	1.33046	0.892	0.495	0	0	TMEM178A
PLCH1	0	0.360544	0.745	0.352	0	0	PLCH1
HS3ST2	0	2.156	0.481	0.091	0	0	HS3ST2
NXPH1	0	0.978843	0.996	0.612	0	0	NXPH1
ANXA11	0	1.67408	0.513	0.135	0	0	ANXA11
RPH3AL	0	3.07886	0.434	0.057	0	0	RPH3AL
SERPINI1	0	1.54293	0.929	0.557	0	0	SERPINI1
LUZP1	0	1.22919	0.86	0.492	0	0	LUZP1
KLHL5	0	1.07799	0.912	0.545	0	0	KLHL5
HS6ST3	0	0.657026	0.938	0.572	0	0	HS6ST3
PRKG1-AS1	0	3.19887	0.409	0.046	0	0	PRKG1-AS1
PTCHD4	0	0.377792	0.953	0.593	0	0	PTCHD4
GPAT3	0	2.46258	0.425	0.068	0	0	GPAT3
SH3GL2	0	1.22457	0.883	0.531	0	0	SH3GL2
KIFC3	0	2.06608	0.438	0.087	0	0	KIFC3
LRRC38	0	4.80253	0.362	0.011	0	0	LRRC38
SOX5	0	1.54337	0.988	0.639	0	0	SOX5
ADARB1	0	1.26593	0.85	0.502	0	0	ADARB1
POSTN	0	4.15217	0.361	0.014	0	0	POSTN
KCTD8	0	0.97075	0.947	0.601	0	0	KCTD8
MMP16	0	1.62928	0.958	0.615	0	0	MMP16
SHISA9	0	0.78004	0.973	0.631	0	0	SHISA9
KIF26B	0	0.589224	0.958	0.622	0	0	KIF26B
HTR7	0	1.91626	0.407	0.074	0	0	HTR7
STRIP2	0	2.59651	0.385	0.054	0	0	STRIP2
ZMAT4	0	0.907207	0.968	0.639	0	0	ZMAT4
PVALB	0	3.34572	0.355	0.028	0	0	PVALB
ASIC2	0	0.704214	0.984	0.658	0	0	ASIC2
PLXNA4	0	1.09186	0.967	0.643	0	0	PLXNA4
BTBD11	0	1.42349	0.973	0.658	0	0	BTBD11
TENM1	0	0.988282	0.959	0.651	0	0	TENM1
RBM20	0	3.04844	0.351	0.044	0	0	RBM20
KLF12	0	1.39661	0.969	0.666	0	0	KLF12
ZNF385B	0	0.894619	0.96	0.661	0	0	ZNF385B
DPP10	0	2.97305	0.986	0.697	0	0	DPP10
FAR2	0	1.17673	0.951	0.662	0	0	FAR2
KIAA1217	0	1.54486	0.997	0.709	0	0	KIAA1217
FAM19A2	0	1.52037	0.988	0.702	0	0	FAM19A2
FMN1	0	1.42415	0.969	0.688	0	0	FMN1
VWC2	0	1.00284	0.947	0.667	0	0	VWC2
MEPE	0	4.81046	0.291	0.015	0	0	MEPE
AKAIN1	0	3.5442	0.293	0.021	0	0	AKAIN1
ESRRG	0	1.46357	0.96	0.698	0	0	ESRRG
ANK1	0	1.0033	0.938	0.683	0	0	ANK1
CLEC16A	0	1.07347	0.934	0.688	0	0	CLEC16A
HECW1	0	1.03524	0.946	0.718	0	0	HECW1
SLC24A2	0	0.929757	0.981	0.758	0	0	SLC24A2
FHIT	0	1.0735	0.965	0.748	0	0	FHIT
KCNAB1	0	0.952016	0.985	0.812	0	0	KCNAB1
PTPRM	0	0.804531	0.99	0.836	0	0	PTPRM
LRRTM4	0	1.0793	0.997	0.849	0	0	LRRTM4
ENOX1	0	0.879699	0.991	0.845	0	0	ENOX1
EPHA6	0	1.65559	0.959	0.813	0	0	EPHA6
LRRC4C	0	0.884721	0.995	0.852	0	0	LRRC4C
KHDRBS2	0	1.03675	0.985	0.844	0	0	KHDRBS2
ATP2B2	0	0.804289	0.961	0.822	0	0	ATP2B2
KCND2	0	1.06849	0.992	0.855	0	0	KCND2
PAM	0	0.750983	0.977	0.856	0	0	PAM
DTNA	0	1.07512	0.987	0.869	0	0	DTNA
SCN1A	0	0.753524	0.973	0.855	0	0	SCN1A
SUPT3H	0	1.04365	0.978	0.862	0	0	SUPT3H
ERBB4	0	1.06449	0.999	0.884	0	0	ERBB4
TENM2	0	0.951681	0.993	0.88	0	0	TENM2
TMEM108	0	0.900197	0.973	0.861	0	0	TMEM108
DLGAP2	0	1.06665	0.994	0.897	0	0	DLGAP2
RASAL2	0	0.748125	0.969	0.877	0	0	RASAL2
HCN1	0	0.813303	0.981	0.893	0	0	HCN1
ATRNL1	0	1.32546	0.996	0.917	0	0	ATRNL1
ERC2	0	1.06761	0.99	0.916	0	0	ERC2
KCNC2	0	1.13851	0.993	0.922	0	0	KCNC2
MEF2C	0	0.957236	0.993	0.928	0	0	MEF2C
AGBL4	0	0.938414	0.994	0.933	0	0	AGBL4
SLC4A10	0	0.675857	0.982	0.921	0	0	SLC4A10
NAV3	0	0.910228	0.995	0.947	0	0	NAV3
MAGI1	0	0.89473	0.992	0.952	0	0	MAGI1
RPS6KA2	0	0.714949	0.989	0.954	0	0	RPS6KA2
CADPS	0	0.723496	0.992	0.963	0	0	CADPS
FGF12	0	1.20742	0.999	0.983	0	0	FGF12
DLGAP1	0	0.655482	1	0.995	0	0	DLGAP1
MAGI2	0	0.611999	0.997	0.993	0	0	MAGI2
MAMDC2	9.88131291682493e-324	1.76464	0.586	0.188	2.90718107325906e-319	0	MAMDC2
GABRD	1.57606941023358e-321	1.80667	0.487	0.123	4.63695381184821e-317	0	GABRD
FHOD3	1.52038821194727e-319	0.969663	0.921	0.622	4.47313415837006e-315	0	FHOD3
DPP10-AS1	1.57101660087356e-317	1.9913	0.406	0.08	4.6220879414301e-313	0	DPP10-AS1
C3orf58	3.41925902845175e-315	0.971984	0.64	0.244	1.00598019876079e-310	0	C3orf58
TSPAN9	1.92144143227171e-310	1.27024	0.785	0.395	5.65307e-306	0	TSPAN9
LRRFIP1	6.60988250691445e-310	0.777098	0.956	0.808	1.94469e-305	0	LRRFIP1
NWD2	9.82669e-306	1.86026	0.482	0.124	2.89111e-301	0	NWD2
TSHZ3	2.28775e-304	0.617788	0.757	0.364	6.7308e-300	0	TSHZ3
SLC36A1	1.49062e-303	1.16387	0.616	0.226	4.38557e-299	0	SLC36A1
CTNNAL1	1.33738e-302	1.15162	0.707	0.301	3.93471e-298	0	CTNNAL1
PTPN13	2.1921e-300	1.06124	0.738	0.332	6.44939e-296	0	PTPN13
CAMK1D	3.60101e-300	0.788372	0.96	0.741	1.05945e-295	0	CAMK1D
TMEM131L	6.79402e-300	1.1117	0.8	0.403	1.99887e-295	0	TMEM131L
GLDC	8.30963e-300	1.53734	0.48	0.131	2.44478e-295	0	GLDC
FAM95C	1.7546e-299	1.67812	0.445	0.109	5.1622e-295	0	FAM95C
DEPTOR	5.07177e-298	1.31169	0.637	0.242	1.49217e-293	0	DEPTOR
SLC26A4-AS1	8.92242e-298	2.22347	0.372	0.068	2.62507e-293	0	SLC26A4-AS1
TCIM	5.31396e-293	2.20673	0.372	0.069	1.56342e-288	0	TCIM
DLC1	2.61245e-292	1.00888	0.874	0.513	7.68608e-288	0	DLC1
NCALD	4.0542e-292	0.902634	0.953	0.737	1.19279e-287	0	NCALD
HS6ST2	1.13067e-290	1.26618	0.637	0.246	3.32656e-286	0	HS6ST2
OSBPL3	1.0985e-288	0.80685	0.944	0.659	3.2319e-284	0	OSBPL3
SIDT1	6.5802e-288	0.555652	0.811	0.432	1.93596e-283	0	SIDT1
IL1RAP	6.73574e-288	0.920104	0.707	0.313	1.98172e-283	0	IL1RAP
DRAM1	4.97473e-287	2.17744	0.354	0.062	1.46361e-282	0	DRAM1
CRTAC1	2.14748e-286	1.16145	0.738	0.342	6.31809e-282	0	CRTAC1
DRP2	9.94946e-284	1.43911	0.568	0.195	2.92723e-279	0	DRP2
ARHGAP42	6.49873e-282	1.19768	0.596	0.221	1.91199e-277	0	ARHGAP42
PHLDB2	1.96954e-279	2.12938	0.33	0.055	5.79458e-275	0	PHLDB2
RARB	6.68447e-279	0.898025	0.773	0.382	1.96664e-274	0	RARB
AR	2.652e-278	2.1288	0.374	0.075	7.80244e-274	0	AR
GRIA4	3.59897e-278	0.424311	0.991	0.779	1.05885e-273	0	GRIA4
RASGRF2	6.14084e-278	0.67968	0.962	0.682	1.8067e-273	0	RASGRF2
FRMD5	1.47592e-276	0.680649	0.984	0.883	4.34232e-272	0	FRMD5
FLRT3	1.01275e-275	1.50077	0.57	0.2	2.9796e-271	0	FLRT3
GNAL	3.7668e-275	0.853929	0.913	0.606	1.10823e-270	0	GNAL
RGS4	2.21619e-274	1.28507	0.429	0.117	6.52025e-270	0	RGS4
GRM8	4.52832e-274	1.5599	0.593	0.23	1.33228e-269	0	GRM8
HHAT	5.08821e-274	1.63993	0.429	0.109	1.497e-269	0	HHAT
ZNF124	9.12765e-274	1.17774	0.564	0.202	2.68545e-269	0	ZNF124
PRDM1	1.13814e-273	1.57198	0.337	0.068	3.34851e-269	0	PRDM1
SLC44A5	2.5949e-273	0.675608	0.98	0.808	7.63445e-269	0	SLC44A5
SND1	4.38183e-273	0.930602	0.895	0.652	1.28918e-268	0	SND1
RTN4RL1	1.72533e-272	1.05451	0.657	0.278	5.07609e-268	0	RTN4RL1
CCDC146	1.57797e-271	1.25868	0.709	0.326	4.64256e-267	0	CCDC146
CFAP74	2.37348e-271	2.67311	0.302	0.043	6.98302e-267	0	CFAP74
EAF2	1.52371e-268	1.7063	0.467	0.132	4.48291e-264	0	EAF2
COL12A1	2.50956e-268	0.885369	0.621	0.258	7.38338e-264	0	COL12A1
CDH7	4.16873e-268	0.525114	0.659	0.307	1.22648e-263	0	CDH7
AC087457.1	4.51995e-268	1.0895	0.697	0.314	1.32981e-263	0	AC087457.1
AC006148.1	7.45805e-265	0.794301	0.963	0.786	2.19423e-260	0	AC006148.1
FLT3	1.3192e-264	0.374803	0.533	0.232	3.88123e-260	0	FLT3
KATNAL2	3.59697e-264	1.2109	0.681	0.302	1.05826e-259	0	KATNAL2
DNAJC21	1.82191e-263	1.26584	0.642	0.267	5.36025e-259	0	DNAJC21
ELL2	9.65186e-263	0.773769	0.711	0.336	2.83967e-258	0	ELL2
DECR1	1.12407e-262	1.1318	0.706	0.326	3.30713e-258	0	DECR1
SLC15A2	2.33986e-262	1.75063	0.456	0.128	6.88411e-258	0	SLC15A2
EEF2K	7.65148e-262	1.01984	0.706	0.327	2.25114e-257	0	EEF2K
PLCH2	3.20018e-261	1.34784	0.515	0.171	9.41525e-257	0	PLCH2
TRPS1	3.45436e-260	0.376196	0.811	0.446	1.01631e-255	0	TRPS1
ADCY8	5.50965e-260	0.746397	0.932	0.635	1.62099e-255	0	ADCY8
MPPED1	1.91782e-259	0.113777	0.751	0.448	5.64243e-255	0	MPPED1
CRHBP	3.08692e-259	1.29493	0.353	0.083	9.08203e-255	0	CRHBP
TACR1	8.7993e-259	0.310599	0.598	0.279	2.58884e-254	0	TACR1
RASSF3	1.9098e-258	1.34529	0.479	0.151	5.61882e-254	0	RASSF3
LDLRAD4	2.53509e-256	0.723214	0.954	0.707	7.45848e-252	0	LDLRAD4
NEFH	7.76325e-256	2.09058	0.372	0.081	2.28403e-251	0	NEFH
CYTH3	2.73856e-255	0.919797	0.869	0.546	8.05713e-251	0	CYTH3
LANCL1	4.46916e-254	0.974144	0.867	0.633	1.31487e-249	0	LANCL1
BX088645.1	1.70316e-253	2.71861	0.261	0.032	5.01088e-249	0	BX088645.1
U91319.1	1.3007e-252	0.779523	0.756	0.388	3.82679e-248	0	U91319.1
SDK1	2.66177e-251	0.611497	0.942	0.649	7.8312e-247	0	SDK1
LINC00886	4.75427e-251	1.36648	0.496	0.163	1.39875e-246	0	LINC00886
TRAM2	4.4359e-248	1.53475	0.397	0.103	1.30509e-243	0	TRAM2
NEAT1	1.37038e-247	1.38435	0.801	0.491	4.03179e-243	0	NEAT1
SPTB	5.18687e-247	1.05865	0.738	0.37	1.52603e-242	0	SPTB
LIN7A	1.58814e-246	0.210268	0.637	0.339	4.67247e-242	0	LIN7A
FAM3C	6.01876e-246	1.22035	0.73	0.371	1.77078e-241	0	FAM3C
STARD9	1.90144e-245	0.813926	0.645	0.292	5.59421e-241	0	STARD9
USP2-AS1	2.6913e-245	1.556	0.482	0.153	7.91806e-241	0	USP2-AS1
CLEC2L	2.99019e-245	1.19588	0.653	0.288	8.79743e-241	0	CLEC2L
GDPD5	3.5372e-245	1.2954	0.469	0.15	1.04068e-240	0	GDPD5
TPST2	4.12911e-245	1.17329	0.522	0.187	1.21483e-240	0	TPST2
SETBP1	7.92363e-245	0.600524	0.983	0.912	2.33121e-240	0	SETBP1
AL445623.2	2.73163e-244	0.890316	0.859	0.528	8.03674e-240	0	AL445623.2
CLMP	8.77224e-244	0.721202	0.534	0.217	2.58088e-239	0	CLMP
SRRM4	5.681e-243	0.713148	0.967	0.849	1.67141e-238	0	SRRM4
HS6ST1	8.34867e-243	1.23019	0.594	0.239	2.45626e-238	0	HS6ST1
ACADL	2.69832e-241	1.4176	0.465	0.146	7.93873e-237	0	ACADL
NIN	4.6967e-241	0.72114	0.886	0.558	1.38182e-236	0	NIN
TRPM2	1.93153e-240	1.04303	0.756	0.399	5.68275e-236	0	TRPM2
IGSF21	5.72751e-240	0.779073	0.576	0.245	1.68509e-235	0	IGSF21
UBE2E2	8.10709e-240	0.664592	0.96	0.839	2.38519e-235	0	UBE2E2
ZNF385D	7.65392e-239	0.535021	0.993	0.884	2.25186e-234	0	ZNF385D
STK39	1.26655e-237	0.931876	0.866	0.614	3.72631e-233	0	STK39
FBXO32	1.57856e-237	0.836972	0.61	0.267	4.64428e-233	0	FBXO32
ARHGAP20	2.30002e-237	0.877237	0.857	0.537	6.76689e-233	0	ARHGAP20
AC104123.1	3.74098e-237	1.39192	0.477	0.155	1.10063e-232	0	AC104123.1
SNCG	2.70078e-236	1.89995	0.326	0.068	7.94596e-232	0	SNCG
AC005537.1	5.39882e-234	1.5557	0.449	0.138	1.58839e-229	0	AC005537.1
NCK2	9.42073e-234	0.99657	0.764	0.411	2.77167e-229	0	NCK2
ITPR1	1.46584e-233	0.713345	0.863	0.532	4.31265e-229	0	ITPR1
TTC39A	4.42691e-233	1.8766	0.292	0.055	1.30244e-228	0	TTC39A
GRM5	1.87442e-232	0.512122	0.989	0.861	5.51473e-228	0	GRM5
KLKB1	1.25534e-230	1.63435	0.389	0.103	3.69333e-226	0	KLKB1
NQO2	5.92465e-230	0.985859	0.831	0.525	1.74309e-225	0	NQO2
NEGR1	6.4629e-230	0.696179	0.99	0.944	1.90145e-225	0	NEGR1
FAM135B	7.28943e-230	0.783838	0.93	0.708	2.14462e-225	0	FAM135B
ANO4	4.49234e-229	0.598477	0.974	0.849	1.32169e-224	0	ANO4
SPATS2L	6.5749e-229	0.726573	0.898	0.592	1.9344e-224	0	SPATS2L
CALN1	2.1612e-228	0.350106	0.888	0.565	6.35845e-224	0	CALN1
LBH	5.09082e-228	2.14071	0.329	0.069	1.49777e-223	0	LBH
ASTN2	2.06234e-227	0.494031	0.989	0.859	6.06761e-223	0	ASTN2
TDRD3	1.49924e-226	0.883162	0.857	0.561	4.41093e-222	0	TDRD3
KIF6	9.62514e-224	1.29627	0.452	0.149	2.83181e-219	0	KIF6
PPP2R2B	8.3309e-223	0.506694	0.989	0.949	2.45103e-218	0	PPP2R2B
TENM3	1.24914e-222	0.663732	0.976	0.832	3.67508e-218	0	TENM3
FAM81A	1.43646e-222	0.919576	0.764	0.416	4.22621e-218	0	FAM81A
MKX	5.73106e-222	1.06145	0.29	0.07	1.68613e-217	0	MKX
SLITRK2	8.12596e-222	1.07844	0.452	0.158	2.39074e-217	0	SLITRK2
EPHX4	9.13559e-222	1.1639	0.478	0.17	2.68778e-217	0	EPHX4
ZNF487	1.26674e-221	1.16644	0.493	0.18	3.72687e-217	0	ZNF487
ARHGAP29	2.53978e-221	0.863637	0.536	0.221	7.47228e-217	0	ARHGAP29
ETS1	3.53621e-220	1.29697	0.391	0.116	1.04039e-215	0	ETS1
AC113383.1	1.86274e-219	1.26444	0.494	0.179	5.48037e-215	0	AC113383.1
TBC1D5	8.91972e-219	0.561379	0.966	0.893	2.62427e-214	0	TBC1D5
SIAH3	8.41439e-216	0.748499	0.714	0.374	2.4756e-211	0	SIAH3
PNKD	1.05817e-215	1.00109	0.646	0.304	3.11325e-211	0	PNKD
EYS	1.7682e-215	0.919355	0.594	0.257	5.20223e-211	0	EYS
CHRD	5.22515e-215	1.2054	0.454	0.156	1.53729e-210	0	CHRD
CAPS2	9.29032e-215	0.828178	0.757	0.414	2.7333e-210	0	CAPS2
ZNF827	2.21369e-214	0.783765	0.773	0.432	6.5129e-210	0	ZNF827
CRYBG3	4.51655e-214	1.45512	0.387	0.11	1.32881e-209	0	CRYBG3
MROH1	4.79851e-214	0.877735	0.84	0.534	1.41177e-209	0	MROH1
MICAL2	5.88291e-214	0.788189	0.875	0.587	1.73081e-209	0	MICAL2
IDH3A	7.54418e-214	1.12867	0.617	0.278	2.21957e-209	0	IDH3A
CHCHD3	8.4376e-214	0.734012	0.908	0.723	2.48243e-209	0	CHCHD3
BCL11B	2.56374e-213	0.251268	0.781	0.482	7.54278e-209	0	BCL11B
KCNIP2	3.88445e-212	1.02746	0.606	0.271	1.14284e-207	0	KCNIP2
CNTNAP2	6.57476e-212	0.419631	1	0.999	1.93436e-207	0	CNTNAP2
STAT4	2.247e-210	0.58433	0.642	0.326	6.61091e-206	0	STAT4
ZBBX	4.28446e-210	1.79581	0.305	0.066	1.26053e-205	0	ZBBX
LPCAT4	5.34565e-210	0.953059	0.641	0.304	1.57274e-205	0	LPCAT4
CLMN	7.08909e-210	1.27033	0.472	0.168	2.08568e-205	0	CLMN
CNTNAP5	8.24505e-210	0.635031	0.972	0.849	2.42578e-205	0	CNTNAP5
EDIL3	3.02667e-209	0.151945	0.822	0.516	8.90477e-205	0	EDIL3
AC006299.1	9.62139e-209	1.56274	0.384	0.11	2.83071e-204	0	AC006299.1
NTN4	3.78585e-208	0.518044	0.714	0.393	1.11384e-203	0	NTN4
MIAT	6.87165e-208	0.819689	0.877	0.625	2.02171e-203	0	MIAT
SH3RF3	1.78942e-207	0.581782	0.944	0.689	5.26465e-203	0	SH3RF3
RASGEF1C	1.92652e-207	1.10949	0.447	0.158	5.66801e-203	0	RASGEF1C
LGR4	2.46268e-207	1.00681	0.679	0.341	7.24544e-203	0	LGR4
KCNK1	2.96742e-207	1.0421	0.548	0.23	8.73043e-203	0	KCNK1
MIR181A1HG	3.24647e-207	0.438015	0.837	0.521	9.55144e-203	0	MIR181A1HG
MITF	9.06069e-207	0.611364	0.743	0.409	2.66575e-202	0	MITF
AL355472.3	1.16567e-205	1.16769	0.496	0.189	3.42952e-201	0	AL355472.3
INPP5J	1.29592e-205	1.74891	0.328	0.08	3.81272e-201	0	INPP5J
ARFGEF2	4.86781e-205	0.828676	0.863	0.597	1.43216e-200	0	ARFGEF2
RUBCNL	5.74541e-204	1.33656	0.375	0.112	1.69036e-199	0	RUBCNL
PHACTR2	5.89487e-204	0.546873	0.78	0.453	1.73433e-199	0	PHACTR2
GREM2	6.77467e-204	0.678016	0.448	0.178	1.99318e-199	0	GREM2
AC092422.1	8.33222e-204	0.653483	0.612	0.293	2.45142e-199	0	AC092422.1
CRACR2A	1.1172e-203	1.37912	0.342	0.093	3.2869e-199	0	CRACR2A
GALNT7	1.1757e-203	0.742419	0.88	0.595	3.45902e-199	0	GALNT7
CSGALNACT1	3.32878e-203	0.702816	0.669	0.339	9.7936e-199	0	CSGALNACT1
CDH18	7.39925e-203	1.0742	0.916	0.785	2.17693e-198	0	CDH18
MGAT5B	1.54176e-202	0.56331	0.594	0.295	4.53602e-198	0	MGAT5B
GRIA3	2.84003e-202	0.391613	0.967	0.737	8.35566e-198	0	GRIA3
AF117829.1	7.74715e-202	0.771484	0.821	0.502	2.27929e-197	0	AF117829.1
ATG5	1.50392e-201	0.832917	0.837	0.539	4.42469e-197	0	ATG5
FGF9	1.90024e-201	0.994891	0.603	0.277	5.5907e-197	0	FGF9
GAD2	1.29436e-200	0.571044	0.936	0.691	3.80813e-196	0	GAD2
EFR3B	3.32051e-200	0.82082	0.861	0.58	9.76928e-196	0	EFR3B
TEAD1	7.22555e-200	0.810778	0.854	0.563	2.12583e-195	0	TEAD1
LINC02231	7.29378e-200	1.95288	0.322	0.077	2.1459e-195	0	LINC02231
ADGRL3	7.38505e-200	0.484254	0.991	0.975	2.17276e-195	0	ADGRL3
MDH1	1.32498e-199	0.952765	0.733	0.404	3.89822e-195	0	MDH1
RASA1	2.06791e-199	0.658464	0.937	0.8	6.08399e-195	0	RASA1
LGI3	3.04599e-199	1.41971	0.399	0.125	8.9616e-195	0	LGI3
FGD6	9.85533e-199	1.24691	0.406	0.133	2.89954e-194	0	FGD6
CFAP46	1.03972e-198	0.935256	0.509	0.208	3.05896e-194	0	CFAP46
ASB13	5.803e-198	1.3526	0.343	0.097	1.7073e-193	0	ASB13
FASTKD1	1.01444e-197	0.878596	0.774	0.456	2.98459e-193	0	FASTKD1
IL1RAPL1	1.16329e-197	0.440181	0.998	0.984	3.42252e-193	0	IL1RAPL1
NCEH1	1.44059e-197	0.825301	0.754	0.425	4.23836e-193	0	NCEH1
MYO19	8.29362e-197	0.961947	0.617	0.292	2.44007e-192	0	MYO19
VPS9D1	1.30411e-196	1.08363	0.633	0.305	3.83683e-192	0	VPS9D1
KCNH3	4.28854e-196	1.06795	0.404	0.137	1.26173e-191	0	KCNH3
NNT-AS1	4.75805e-196	0.975171	0.676	0.347	1.39987e-191	0	NNT-AS1
NDST4	6.23228e-196	0.169098	0.443	0.199	1.8336e-191	0	NDST4
PPIP5K2	9.49288e-196	0.767296	0.889	0.689	2.7929e-191	0	PPIP5K2
KCNAB2	3.34552e-195	0.862202	0.713	0.384	9.84287e-191	0	KCNAB2
HUNK	7.87156e-195	0.723309	0.775	0.452	2.31589e-190	0	HUNK
MPC1	8.67426e-195	0.92089	0.661	0.333	2.55205e-190	0	MPC1
PRPSAP1	4.20112e-194	0.859638	0.768	0.446	1.23601e-189	0	PRPSAP1
CRYBG1	1.38966e-193	2.05791	0.315	0.075	4.08853e-189	0	CRYBG1
DDAH1	2.45626e-193	0.960092	0.563	0.251	7.22658e-189	0	DDAH1
PPFIA2	2.85051e-193	0.485755	0.982	0.942	8.38649e-189	0	PPFIA2
LRP5	4.39812e-193	1.85558	0.253	0.047	1.29397e-188	0	LRP5
NRG4	2.45036e-192	1.33828	0.43	0.149	7.20921e-188	0	NRG4
STS	6.56929e-192	1.21353	0.457	0.169	1.93275e-187	0	STS
ARSG	1.48893e-191	0.971618	0.637	0.313	4.38057e-187	0	ARSG
SMCO4	1.59823e-191	1.36978	0.342	0.099	4.70215e-187	0	SMCO4
FAM227A	5.15124e-190	1.37016	0.321	0.088	1.51555e-185	0	FAM227A
PREP	5.83713e-190	0.738124	0.694	0.371	1.71734e-185	0	PREP
TRIO	1.2358e-188	0.436965	0.984	0.938	3.63585e-184	0	TRIO
NECTIN3	1.95964e-188	0.474467	0.667	0.37	5.76546e-184	0	NECTIN3
ARHGEF10L	3.12382e-188	0.802321	0.538	0.242	9.19058e-184	0	ARHGEF10L
CORO6	3.49987e-188	0.788822	0.66	0.34	1.0297e-183	0	CORO6
EMC2	1.63845e-187	0.9163	0.584	0.271	4.82049e-183	0	EMC2
AP002884.3	2.86319e-187	1.14529	0.449	0.168	8.4238e-183	0	AP002884.3
ARHGEF6	4.74844e-187	1.10779	0.464	0.179	1.39704e-182	0	ARHGEF6
TBC1D30	4.82551e-187	0.740484	0.685	0.367	1.41971e-182	0	TBC1D30
MANBA	9.24991e-187	0.864593	0.802	0.502	2.72142e-182	0	MANBA
ARL6	1.07005e-186	0.966932	0.649	0.328	3.1482e-182	0	ARL6
ITPR2	1.19604e-186	0.532413	0.656	0.346	3.51887e-182	0	ITPR2
VAX1	1.93201e-186	1.24465	0.252	0.059	5.68418e-182	0	VAX1
C1QL1	2.32628e-186	1.5531	0.322	0.086	6.84415e-182	0	C1QL1
RASSF5	3.51561e-186	1.05275	0.474	0.188	1.03433e-181	0	RASSF5
ARX	1.14887e-185	0.678433	0.676	0.36	3.3801e-181	0	ARX
PTGFRN	1.44234e-185	1.41768	0.298	0.076	4.24351e-181	0	PTGFRN
AKNA	2.53837e-185	1.14	0.376	0.124	7.46812e-181	0	AKNA
DHX32	2.91216e-185	0.796475	0.671	0.352	8.56788e-181	0	DHX32
CTXND1	5.20914e-185	0.427719	0.477	0.22	1.53258e-180	0	CTXND1
RASSF8	5.58469e-185	0.505835	0.707	0.398	1.64307e-180	0	RASSF8
ST7	2.5799e-184	0.683494	0.919	0.754	7.59032e-180	0	ST7
EXTL2	4.32114e-184	0.984133	0.565	0.257	1.27132e-179	0	EXTL2
NT5DC1	2.18109e-183	0.874633	0.684	0.365	6.41698e-179	0	NT5DC1
ANTXR1	3.50178e-183	0.152331	0.628	0.355	1.03026e-178	0	ANTXR1
UPP1	7.67743e-182	0.721419	0.595	0.292	2.25878e-177	0	UPP1
KCNK10	2.47206e-181	0.825514	0.443	0.18	7.27306e-177	0	KCNK10
RCBTB2	2.80205e-181	1.10086	0.363	0.118	8.24391e-177	0	RCBTB2
BCAS4	3.99168e-181	0.89328	0.526	0.233	1.17439e-176	0	BCAS4
AHCYL2	6.24788e-181	0.738448	0.854	0.583	1.83819e-176	0	AHCYL2
TAOK3	6.34052e-181	0.687565	0.924	0.731	1.86545e-176	0	TAOK3
PTPRZ1	1.05582e-180	0.773105	0.69	0.375	3.10633e-176	0	PTPRZ1
NAV1	1.34388e-180	0.673284	0.92	0.714	3.95384e-176	0	NAV1
SLC45A4	2.19911e-180	0.804873	0.569	0.269	6.47e-176	0	SLC45A4
GABRB2	3.03974e-180	0.471141	0.982	0.908	8.94323e-176	0	GABRB2
SLC39A14	3.71299e-180	0.937472	0.54	0.243	1.0924e-175	0	SLC39A14
MYO1E	3.9313e-180	1.96114	0.283	0.064	1.15663e-175	0	MYO1E
AJAP1	5.25655e-179	0.387173	0.775	0.485	1.54653e-174	0	AJAP1
KIAA1024	5.27674e-179	0.845555	0.371	0.134	1.55247e-174	0	KIAA1024
EPRS	7.16142e-179	0.826941	0.74	0.428	2.10696e-174	0	EPRS
CAMKK2	9.2623e-179	0.998486	0.502	0.213	2.72506e-174	0	CAMKK2
LAMB1	3.79435e-178	1.07872	0.392	0.138	1.11634e-173	0	LAMB1
GOT1	8.8078e-178	0.991879	0.598	0.289	2.59134e-173	0	GOT1
SPATA6	1.05285e-177	0.900618	0.551	0.252	3.09758e-173	0	SPATA6
CBLB	3.85036e-177	0.72662	0.821	0.528	1.13281e-172	0	CBLB
SCN1B	4.14739e-177	1.09932	0.438	0.166	1.2202e-172	0	SCN1B
GUCY1A1	4.9765e-177	0.762061	0.662	0.352	1.46414e-172	0	GUCY1A1
COL4A1	1.77523e-176	0.623112	0.447	0.198	5.22289e-172	0	COL4A1
MYO3B	1.44479e-175	0.99315	0.403	0.147	4.25071e-171	0	MYO3B
FTCDNL1	1.9161e-175	0.940271	0.498	0.215	5.63734e-171	0	FTCDNL1
ANKS1A	2.00354e-175	0.679969	0.898	0.698	5.89461e-171	0	ANKS1A
FAM155A	4.05526e-175	0.37728	0.998	0.993	1.1931e-170	0	FAM155A
JARID2	6.61943e-175	0.676752	0.867	0.596	1.9475e-170	0	JARID2
GABRG3	1.03252e-174	0.485428	0.978	0.838	3.03777e-170	0	GABRG3
EPB41L3	1.27728e-174	0.577815	0.94	0.769	3.7579e-170	0	EPB41L3
SLC4A8	1.30426e-174	0.714131	0.844	0.564	3.83727e-170	0	SLC4A8
TRERF1	2.09538e-174	0.66903	0.903	0.683	6.16482e-170	0	TRERF1
POLQ	8.45912e-174	1.86314	0.271	0.061	2.48876e-169	0	POLQ
FRMD4B	3.01216e-173	0.20735	0.626	0.364	8.86209e-169	0	FRMD4B
ANXA6	3.03712e-173	0.8155	0.64	0.332	8.93551e-169	0	ANXA6
AC105383.1	3.7513e-173	0.899236	0.624	0.317	1.10367e-168	0	AC105383.1
CAMTA1	6.14613e-173	0.421715	0.985	0.941	1.80825e-168	0	CAMTA1
KCNH1	2.04125e-172	0.767757	0.799	0.503	6.00557e-168	0	KCNH1
MDGA2	2.32914e-172	0.396496	0.991	0.958	6.85256e-168	0	MDGA2
AC124319.2	6.04073e-172	0.816835	0.741	0.436	1.77724e-167	0	AC124319.2
NGF	8.87574e-172	0.822172	0.392	0.15	2.61133e-167	0	NGF
PLA2R1	4.15572e-171	0.8985	0.575	0.277	1.22265e-166	0	PLA2R1
GDPD1	1.40191e-170	0.778895	0.749	0.445	4.12457e-166	0	GDPD1
ZNF718	1.44249e-170	0.79501	0.763	0.462	4.24396e-166	0	ZNF718
PLCE1	3.08965e-170	0.771087	0.591	0.292	9.09006e-166	0	PLCE1
MRRF	3.70708e-170	0.881864	0.572	0.276	1.09066e-165	0	MRRF
MBP	6.95798e-170	0.245498	0.72	0.442	2.04711e-165	0	MBP
PRKAG2	1.1631e-169	0.73669	0.82	0.534	3.42196e-165	0	PRKAG2
TMEM38A	1.16784e-169	0.682155	0.553	0.269	3.4359e-165	0	TMEM38A
SIPA1L1	1.28392e-169	0.480026	0.978	0.912	3.77742e-165	0	SIPA1L1
STAC2	2.46101e-169	1.12569	0.43	0.166	7.24053e-165	0	STAC2
TBC1D4	2.97268e-169	0.648691	0.884	0.641	8.74592e-165	0	TBC1D4
GSTK1	3.16826e-169	1.02824	0.415	0.157	9.32134e-165	0	GSTK1
LINC00970	3.64479e-169	0.260428	0.478	0.239	1.07233e-164	0	LINC00970
VSNL1	5.55582e-169	0.551025	0.887	0.622	1.63458e-164	0	VSNL1
KIAA1841	1.00583e-168	0.823703	0.742	0.441	2.95924e-164	0	KIAA1841
MIPEP	1.04966e-168	0.735317	0.689	0.384	3.08821e-164	0	MIPEP
CXXC4-AS1	1.60142e-168	0.824384	0.55	0.261	4.71153e-164	0	CXXC4-AS1
AC013652.1	1.91156e-168	1.13235	0.461	0.186	5.62399e-164	0	AC013652.1
NPPC	2.21592e-168	1.63389	0.267	0.064	6.51946e-164	0	NPPC
PRKCA	7.73669e-168	0.475038	0.967	0.792	2.27621e-163	0	PRKCA
ST6GALNAC3	1.85173e-167	0.757769	0.779	0.481	5.44797e-163	0	ST6GALNAC3
ASS1	2.8717e-167	0.976435	0.429	0.17	8.44883e-163	0	ASS1
SPOCK3	4.67804e-167	0.17065	0.986	0.823	1.37633e-162	0	SPOCK3
RAB3IP	5.85516e-167	0.27749	0.684	0.414	1.72265e-162	0	RAB3IP
FANK1	8.24944e-167	1.00066	0.39	0.144	2.42707e-162	0	FANK1
PIP4K2A	1.52825e-166	0.658549	0.654	0.353	4.49625e-162	0	PIP4K2A
TSPOAP1	2.05671e-166	0.551327	0.577	0.302	6.05105e-162	0	TSPOAP1
ELAVL2	2.22625e-166	0.539011	0.93	0.723	6.54985e-162	0	ELAVL2
TLE1	3.15977e-165	0.744341	0.419	0.175	9.29635e-161	0	TLE1
OXR1	3.43865e-165	0.400722	0.993	0.927	1.01168e-160	0	OXR1
PTPDC1	9.36464e-165	0.727839	0.496	0.228	2.75517e-160	0	PTPDC1
FAM184B	1.27679e-164	0.767118	0.487	0.218	3.75646e-160	0	FAM184B
CASC1	2.28792e-164	1.02976	0.407	0.155	6.73128e-160	0	CASC1
LRRC4	2.42311e-164	0.950878	0.491	0.215	7.12902e-160	0	LRRC4
NCOA3	8.20311e-164	0.699653	0.777	0.482	2.41344e-159	0	NCOA3
CYFIP1	1.83792e-163	0.51084	0.727	0.435	5.40735e-159	0	CYFIP1
HS3ST1	4.55053e-163	0.90791	0.511	0.232	1.33881e-158	0	HS3ST1
MRE11	9.61939e-163	0.836093	0.562	0.274	2.83012e-158	0	MRE11
ZPBP	1.06863e-162	1.52105	0.351	0.113	3.14402e-158	0	ZPBP
TOX3	1.51234e-162	0.213477	0.791	0.523	4.44946e-158	0	TOX3
FAM208B	1.59934e-162	0.666774	0.87	0.632	4.70542e-158	0	FAM208B
MB21D2	1.83845e-162	0.602738	0.738	0.442	5.4089e-158	0	MB21D2
RCAN1	2.3487e-162	0.700332	0.604	0.315	6.91012e-158	0	RCAN1
UGP2	2.66505e-162	0.718953	0.659	0.361	7.84084e-158	0	UGP2
PLAGL1	3.24489e-162	0.266421	0.637	0.378	9.5468e-158	0	PLAGL1
LPP	3.64588e-162	0.551169	0.925	0.71	1.07266e-157	0	LPP
PARVA	1.87548e-161	0.741056	0.58	0.293	5.51786e-157	0	PARVA
ANKRD7	2.33807e-161	0.815859	0.621	0.325	6.87885e-157	0	ANKRD7
ACO2	3.3551e-161	0.665729	0.68	0.384	9.87105e-157	0	ACO2
CAMK2D	4.81447e-160	0.549029	0.905	0.679	1.41647e-155	0	CAMK2D
GSAP	6.46601e-160	0.59176	0.652	0.364	1.90237e-155	0	GSAP
MYH10	1.05735e-159	0.65116	0.889	0.696	3.11084e-155	0	MYH10
KCNT1	1.74538e-159	0.520483	0.802	0.517	5.13507e-155	0	KCNT1
CFAP161	2.74113e-159	0.718366	0.829	0.559	8.06467e-155	0	CFAP161
C11orf87	6.23533e-159	0.593672	0.476	0.224	1.8345e-154	0	C11orf87
COL28A1	2.72666e-158	0.960702	0.424	0.171	8.02211e-154	0	COL28A1
AC006058.1	2.89113e-158	1.17283	0.315	0.1	8.50599e-154	0	AC006058.1
SYN2	2.94611e-158	0.451442	0.978	0.922	8.66775e-154	0	SYN2
SCN8A	8.1019e-158	0.53253	0.936	0.829	2.38366e-153	0	SCN8A
SACS	1.05624e-157	0.617711	0.901	0.673	3.10756e-153	0	SACS
AC098864.1	2.34306e-157	0.994383	0.519	0.24	6.89352e-153	0	AC098864.1
LRP8	3.1751e-157	0.672586	0.758	0.467	9.34146e-153	0	LRP8
NDUFS4	3.73226e-157	0.733101	0.767	0.481	1.09807e-152	0	NDUFS4
DNAH7	5.0516e-157	0.568422	0.477	0.227	1.48623e-152	0	DNAH7
AC244021.1	1.20468e-156	0.490314	0.681	0.401	3.5443e-152	0	AC244021.1
CCNB1IP1	2.18995e-156	0.727931	0.407	0.17	6.44304e-152	0	CCNB1IP1
SLC35F4	2.72736e-156	0.444931	0.812	0.534	8.02417e-152	0	SLC35F4
SIRT5	3.26698e-156	0.829408	0.61	0.319	9.61178e-152	0	SIRT5
FILIP1	4.22324e-156	1.5936	0.317	0.094	1.24252e-151	0	FILIP1
MRPS30-DT	9.98033e-156	0.74187	0.512	0.246	2.93631e-151	0	MRPS30-DT
CCNJL	1.06216e-155	0.719358	0.554	0.278	3.12499e-151	0	CCNJL
TTC39B	1.38185e-155	0.573138	0.808	0.527	4.06554e-151	0	TTC39B
TCEA3	1.69435e-155	1.3718	0.303	0.09	4.98495e-151	0	TCEA3
ESRRA	1.77724e-155	1.08959	0.38	0.142	5.22881e-151	0	ESRRA
KCNMB4	2.50035e-155	0.522143	0.541	0.28	7.35627e-151	0	KCNMB4
TMEM266	2.51209e-155	0.695845	0.568	0.289	7.39083e-151	0	TMEM266
PCCA	4.51843e-155	0.593994	0.917	0.73	1.32937e-150	0	PCCA
GCLC	4.52395e-155	0.716385	0.543	0.27	1.33099e-150	0	GCLC
GLRB	6.26501e-155	0.713533	0.791	0.511	1.84323e-150	0	GLRB
ARHGEF2	1.20595e-154	0.800817	0.392	0.159	3.54802e-150	0	ARHGEF2
PCSK6	3.0329e-154	0.847754	0.467	0.207	8.9231e-150	0	PCSK6
FRMPD1	1.12528e-153	0.61135	0.438	0.205	3.31068e-149	0	FRMPD1
MOB1B	1.69001e-153	0.615526	0.654	0.369	4.97218e-149	0	MOB1B
SFXN4	4.34348e-153	0.696031	0.531	0.263	1.27789e-148	0	SFXN4
SLC38A6	5.24737e-153	0.674742	0.791	0.511	1.54383e-148	0	SLC38A6
OXNAD1	8.26988e-153	0.779708	0.657	0.365	2.43308e-148	0	OXNAD1
NHS	9.29023e-153	0.537072	0.951	0.822	2.73328e-148	0	NHS
SNCAIP	1.30273e-152	0.260516	0.539	0.303	3.83275e-148	0	SNCAIP
SHISAL1	2.60855e-152	0.917675	0.344	0.128	7.67462e-148	0	SHISAL1
SPAG16	6.17285e-152	0.647443	0.918	0.729	1.81611e-147	0	SPAG16
METTL9	6.94291e-152	0.635152	0.577	0.305	2.04267e-147	0	METTL9
KLHL8	8.08385e-152	0.733763	0.545	0.273	2.37835e-147	0	KLHL8
COBLL1	1.01994e-151	1.54798	0.324	0.101	3.00077e-147	0	COBLL1
ATP1A1	2.34581e-151	0.766546	0.788	0.518	6.90159e-147	0	ATP1A1
AC008050.1	2.80869e-151	1.18657	0.352	0.124	8.26344e-147	0	AC008050.1
ANO6	5.64175e-151	0.478679	0.571	0.311	1.65986e-146	0	ANO6
SLC4A7	7.17359e-151	0.536053	0.847	0.581	2.11054e-146	0	SLC4A7
LYPD6B	1.42619e-150	0.237364	0.659	0.403	4.19599e-146	0	LYPD6B
PPARA	1.97752e-150	0.681699	0.469	0.219	5.81805e-146	0	PPARA
GALNT1	2.21938e-150	0.604863	0.792	0.512	6.52964e-146	0	GALNT1
KCNA2	2.34195e-149	0.715524	0.563	0.289	6.89024e-145	0	KCNA2
IFT57	2.44218e-149	0.764435	0.414	0.179	7.18514e-145	0	IFT57
KCNMA1	3.15778e-149	0.395535	0.986	0.945	9.2905e-145	0	KCNMA1
RELL2	3.43699e-149	1.18262	0.309	0.099	1.0112e-144	0	RELL2
TCP11L2	4.15163e-149	0.955206	0.443	0.19	1.22145e-144	0	TCP11L2
FBXO34	8.7375e-149	0.577073	0.81	0.536	2.57066e-144	0	FBXO34
SMPDL3A	1.13888e-148	1.41284	0.266	0.073	3.3507e-144	0	SMPDL3A
SYTL2	1.23163e-148	0.70394	0.504	0.246	3.62357e-144	0	SYTL2
GRIP2	1.67661e-148	0.593913	0.806	0.531	4.93274e-144	0	GRIP2
PHF7	3.00341e-148	1.06355	0.316	0.106	8.83633e-144	0	PHF7
DYSF	4.78985e-148	1.19958	0.33	0.113	1.40922e-143	0	DYSF
ATP10D	5.75987e-148	0.690887	0.625	0.343	1.69461e-143	0	ATP10D
AC115622.1	8.34587e-148	1.16875	0.38	0.143	2.45544e-143	0	AC115622.1
STXBP5	9.65604e-148	0.492779	0.958	0.857	2.8409e-143	0	STXBP5
MFHAS1	1.01185e-147	0.67401	0.73	0.445	2.97697e-143	0	MFHAS1
CMC1	1.0152e-147	0.611499	0.698	0.415	2.98682e-143	0	CMC1
45539	1.09254e-147	0.656845	0.396	0.17	3.21435e-143	0	45539
KCNK12	2.81957e-147	0.339805	0.556	0.313	8.29544e-143	0	KCNK12
ME3	3.33491e-147	0.573159	0.912	0.73	9.81164e-143	0	ME3
PDK3	6.32877e-147	0.338297	0.668	0.408	1.86199e-142	0	PDK3
CKMT1B	6.63685e-147	0.774319	0.488	0.229	1.95263e-142	0	CKMT1B
GREB1	8.96348e-147	0.520351	0.759	0.481	2.63715e-142	0	GREB1
ZC3H12C	1.20663e-146	0.415257	0.698	0.429	3.55003e-142	0	ZC3H12C
ACSL1	1.6128e-146	0.541354	0.505	0.256	4.74501e-142	0	ACSL1
KCNMB2-AS1	2.16947e-146	0.603052	0.692	0.41	6.3828e-142	0	KCNMB2-AS1
ARHGAP22	2.46179e-146	0.798227	0.484	0.227	7.24284e-142	0	ARHGAP22
MAN1C1	2.83658e-146	0.69461	0.788	0.517	8.3455e-142	0	MAN1C1
LGI2	3.30302e-146	0.911248	0.373	0.148	9.71781e-142	0	LGI2
UXS1	3.47587e-146	0.743278	0.64	0.356	1.02264e-141	0	UXS1
LRRC9	3.5865e-146	1.10902	0.342	0.122	1.05518e-141	0	LRRC9
ETS2	4.97325e-146	1.18209	0.263	0.076	1.46318e-141	0	ETS2
PRCP	7.12248e-146	0.839537	0.527	0.259	2.0955e-141	0	PRCP
TCAIM	1.05066e-145	0.5994	0.813	0.544	3.09114e-141	0	TCAIM
COQ9	1.12209e-145	0.673386	0.454	0.212	3.30131e-141	0	COQ9
RAP1GAP2	1.29576e-145	0.441839	0.772	0.502	3.81224e-141	0	RAP1GAP2
TAF4B	1.31163e-145	0.627967	0.443	0.207	3.85895e-141	0	TAF4B
LRRTM3	3.70938e-145	0.423815	0.961	0.809	1.09134e-140	0	LRRTM3
PAG1	4.61912e-145	0.425113	0.65	0.387	1.35899e-140	0	PAG1
SLC7A14	4.62086e-145	0.275947	0.767	0.511	1.3595e-140	0	SLC7A14
EPM2A	6.52193e-145	0.554951	0.63	0.359	1.91882e-140	0	EPM2A
MAN2A1	7.07935e-145	0.483603	0.794	0.521	2.08281e-140	0	MAN2A1
SUDS3	8.73145e-145	0.695468	0.619	0.342	2.56888e-140	0	SUDS3
CUX1	1.2039e-144	0.516051	0.929	0.729	3.54199e-140	0	CUX1
DENND1B	1.40822e-144	0.624078	0.862	0.629	4.14313e-140	0	DENND1B
KLHL13	3.17945e-144	0.441686	0.463	0.233	9.35427e-140	0	KLHL13
RASSF8-AS1	4.04143e-144	0.779407	0.427	0.19	1.18903e-139	0	RASSF8-AS1
JDP2	4.13897e-144	0.682291	0.536	0.274	1.21773e-139	0	JDP2
CHN1	6.95234e-144	0.232331	0.742	0.49	2.04545e-139	0	CHN1
RASSF4	7.92652e-144	0.623221	0.515	0.259	2.33206e-139	0	RASSF4
SGK1	8.29872e-144	0.362043	0.864	0.612	2.44157e-139	0	SGK1
MTUS1	8.35388e-144	0.373964	0.808	0.545	2.45779e-139	0	MTUS1
AKAP1	1.10166e-143	0.579166	0.547	0.287	3.24121e-139	0	AKAP1
NEFL	2.89282e-143	0.86992	0.303	0.105	8.51098e-139	0	NEFL
HERC6	3.46206e-143	0.64844	0.511	0.258	1.01857e-138	0	HERC6
MRS2	3.79866e-143	0.668896	0.581	0.313	1.1176e-138	0	MRS2
RCOR1	3.8937e-143	0.490586	0.581	0.322	1.14557e-138	0	RCOR1
TBC1D31	3.91272e-143	0.656861	0.514	0.257	1.15116e-138	0	TBC1D31
ST3GAL6	7.24481e-143	0.645444	0.592	0.321	2.1315e-138	0	ST3GAL6
ANKRD33B	1.40202e-142	0.971932	0.269	0.085	4.12488e-138	0	ANKRD33B
NUP50-DT	1.5078e-142	0.613702	0.661	0.384	4.4361e-138	0	NUP50-DT
METTL25	2.12589e-142	0.543075	0.66	0.387	6.25457e-138	0	METTL25
IQCB1	8.84683e-142	0.672306	0.725	0.446	2.60283e-137	0	IQCB1
DNMBP	1.55778e-141	0.573675	0.539	0.284	4.58314e-137	0	DNMBP
CHSY1	2.35594e-141	0.539506	0.636	0.369	6.93141e-137	0	CHSY1
KAT2B	2.5099e-141	0.21745	0.606	0.368	7.38438e-137	0	KAT2B
LINC00882	3.12836e-141	0.526215	0.938	0.806	9.20395e-137	0	LINC00882
THEM4	4.26844e-141	0.564387	0.488	0.244	1.25582e-136	0	THEM4
COX10	4.74707e-141	0.532666	0.563	0.306	1.39663e-136	0	COX10
45362	7.87512e-141	0.35888	0.766	0.503	2.31694e-136	0	45362
AL359915.2	8.82309e-141	0.666848	0.574	0.308	2.59584e-136	0	AL359915.2
JPH1	1.08518e-140	0.521664	0.612	0.347	3.1927e-136	0	JPH1
CACNA1A	1.17313e-140	0.418942	0.985	0.93	3.45146e-136	0	CACNA1A
C9orf3	1.33137e-140	0.538519	0.928	0.798	3.91704e-136	0	C9orf3
JAZF1-AS1	2.07536e-140	0.94555	0.377	0.151	6.10592e-136	0	JAZF1-AS1
CPED1	2.5935e-140	0.723133	0.27	0.093	7.63035e-136	0	CPED1
LMLN	3.71322e-140	0.701462	0.485	0.236	1.09247e-135	0	LMLN
SESN3	4.67344e-140	0.669795	0.824	0.575	1.37497e-135	0	SESN3
SLC35F3	5.33138e-140	0.155016	0.897	0.661	1.56854e-135	0	SLC35F3
PCTP	7.49705e-140	0.721804	0.452	0.212	2.20571e-135	0	PCTP
SPTLC2	8.18807e-140	0.531922	0.507	0.261	2.40901e-135	0	SPTLC2
OPCML	9.21793e-140	0.494577	0.996	0.985	2.71201e-135	0	OPCML
ZC3H8	1.05578e-139	0.572469	0.723	0.449	3.10622e-135	0	ZC3H8
CAST	1.19206e-139	0.546973	0.683	0.411	3.50717e-135	0	CAST
AL645568.1	1.43297e-139	0.590918	0.735	0.46	4.21593e-135	0	AL645568.1
CDH11	2.17556e-139	0.500081	0.681	0.412	6.40072e-135	0	CDH11
SORBS1	3.2529e-139	0.440516	0.962	0.892	9.57035e-135	0	SORBS1
SLC7A8	3.26994e-139	0.560741	0.721	0.446	9.6205e-135	0	SLC7A8
NNT	5.94575e-139	0.682762	0.82	0.575	1.7493e-134	0	NNT
ITGA9	7.04894e-139	0.32568	0.684	0.419	2.07387e-134	0	ITGA9
GAS6	1.24928e-138	0.6361	0.503	0.255	3.67549e-134	0	GAS6
DLGAP1-AS4	1.60705e-138	1.25177	0.425	0.178	4.72809e-134	0	DLGAP1-AS4
ABCB9	2.47695e-138	0.612199	0.678	0.403	7.28744e-134	0	ABCB9
RAD1	2.53536e-138	1.24971	0.287	0.09	7.45929e-134	0	RAD1
MYO9B	4.74113e-138	0.469733	0.638	0.375	1.39489e-133	0	MYO9B
UBA6-AS1	5.15464e-138	0.594589	0.918	0.74	1.51655e-133	0	UBA6-AS1
ADGRB1	7.05715e-138	0.294296	0.58	0.341	2.07628e-133	0	ADGRB1
ZNF493	7.1597e-138	0.800042	0.456	0.212	2.10646e-133	0	ZNF493
VPS13D	1.42096e-137	0.546405	0.927	0.77	4.1806e-133	0	VPS13D
LINC01252	1.5621e-137	0.793627	0.467	0.219	4.59585e-133	0	LINC01252
ELOVL7	2.36787e-137	0.793991	0.427	0.191	6.9665e-133	0	ELOVL7
NAPG	3.36373e-137	0.635939	0.612	0.344	9.89643e-133	0	NAPG
OGDH	4.79451e-137	0.51317	0.728	0.458	1.41059e-132	0	OGDH
MIR124-2HG	6.22682e-137	0.587309	0.87	0.641	1.83199e-132	0	MIR124-2HG
BMP2K	8.15584e-137	0.617883	0.682	0.409	2.39953e-132	0	BMP2K
TCTEX1D1	1.77172e-136	1.11159	0.324	0.117	5.21258e-132	0	TCTEX1D1
CMC2	2.33778e-136	0.634787	0.639	0.367	6.87799e-132	0	CMC2
EOGT	2.56834e-136	0.759443	0.371	0.157	7.55631e-132	0	EOGT
RAB15	2.90017e-136	0.62732	0.477	0.236	8.53259e-132	0	RAB15
UTRN	3.93606e-136	0.176014	0.643	0.405	1.15803e-131	0	UTRN
FBH1	4.65372e-136	0.614174	0.546	0.29	1.36917e-131	0	FBH1
NTRK2	6.94582e-136	0.361511	0.991	0.97	2.04353e-131	0	NTRK2
MEF2A	1.40583e-135	0.573801	0.903	0.725	4.1361e-131	0	MEF2A
NECTIN3-AS1	1.60855e-135	1.06096	0.347	0.131	4.73253e-131	0	NECTIN3-AS1
VSTM2L	3.19189e-135	0.390393	0.612	0.365	9.39085e-131	0	VSTM2L
TPCN2	3.46371e-135	0.704997	0.493	0.245	1.01906e-130	0	TPCN2
UBE2O	5.6206e-135	0.548168	0.819	0.561	1.65364e-130	0	UBE2O
RECK	6.30484e-135	0.581268	0.714	0.443	1.85495e-130	0	RECK
AP2A1	7.09741e-135	0.768176	0.48	0.234	2.08813e-130	0	AP2A1
GPR22	1.04732e-134	1.03148	0.397	0.164	3.08133e-130	0	GPR22
PKD2	3.00918e-134	0.567274	0.888	0.693	8.85331e-130	0	PKD2
USP45	4.54141e-134	0.716513	0.631	0.359	1.33613e-129	0	USP45
GPRC5B	5.54762e-134	0.213301	0.509	0.299	1.63217e-129	0	GPRC5B
LRFN5	6.02796e-134	0.451619	0.96	0.831	1.77349e-129	0	LRFN5
MAP3K14	6.19859e-134	0.637694	0.436	0.207	1.82369e-129	0	MAP3K14
LHPP	6.88128e-134	0.622403	0.628	0.361	2.02454e-129	0	LHPP
KAZN	9.36825e-134	0.283508	0.998	0.997	2.75623e-129	0	KAZN
MCC	1.14211e-133	0.267193	0.738	0.492	3.36019e-129	0	MCC
ZC2HC1A	1.16746e-133	0.507561	0.666	0.402	3.43477e-129	0	ZC2HC1A
CHKA	1.61245e-133	0.541288	0.698	0.43	4.744e-129	0	CHKA
HAPLN1	4.54206e-133	0.150279	0.314	0.152	1.33632e-128	0	HAPLN1
GYS1	5.04527e-133	0.526979	0.508	0.267	1.48437e-128	0	GYS1
KCNN2	6.09819e-133	0.203257	0.757	0.519	1.79415e-128	0	KCNN2
AC007376.2	7.10026e-133	0.956846	0.316	0.117	2.08897e-128	0	AC007376.2
NMT1	8.40928e-133	0.39064	0.647	0.394	2.47409e-128	0	NMT1
DLD	1.17641e-132	0.576902	0.542	0.294	3.46113e-128	0	DLD
SPATA7	1.27337e-132	0.59864	0.721	0.451	3.74639e-128	0	SPATA7
CDON	1.29888e-132	0.60492	0.656	0.389	3.82145e-128	0	CDON
PSMA1	2.67779e-132	0.456161	0.518	0.282	7.87832e-128	0	PSMA1
ADGRA1	2.69119e-132	0.346896	0.495	0.273	7.91776e-128	0	ADGRA1
NCR3LG1	3.09056e-132	0.60416	0.45	0.22	9.09273e-128	0	NCR3LG1
KIF3B	4.06863e-132	0.512557	0.631	0.371	1.19703e-127	0	KIF3B
ANKRD42	7.84631e-132	0.500065	0.496	0.261	2.30846e-127	0	ANKRD42
RBFOX1	9.48213e-132	0.262185	0.999	0.974	2.78974e-127	0	RBFOX1
CYP4V2	2.00747e-131	0.637806	0.536	0.286	5.90618e-127	0	CYP4V2
AFF2	3.76911e-131	0.373424	0.809	0.558	1.10891e-126	0	AFF2
ZNF277	5.46483e-131	0.459655	0.565	0.321	1.60781e-126	0	ZNF277
BRINP2	7.52739e-131	0.297123	0.797	0.551	2.21463e-126	0	BRINP2
AL159163.1	9.86954e-131	0.266751	0.454	0.246	2.90372e-126	0	AL159163.1
COG5	9.93791e-131	0.531549	0.919	0.764	2.92383e-126	0	COG5
SDHB	1.06208e-130	0.689438	0.522	0.271	3.12475e-126	0	SDHB
FBXL13	1.25802e-130	0.636132	0.496	0.255	3.70122e-126	0	FBXL13
NFKB1	1.57457e-130	0.607701	0.766	0.503	4.63255e-126	0	NFKB1
PLSCR1	2.8735e-130	0.697874	0.319	0.13	8.45411e-126	0	PLSCR1
ATP5F1C	4.99003e-130	0.527846	0.527	0.286	1.46812e-125	0	ATP5F1C
GRK4	5.34962e-130	0.647611	0.756	0.493	1.57391e-125	0	GRK4
BCAN	5.57633e-130	0.731787	0.315	0.122	1.64061e-125	0	BCAN
LRGUK	6.34453e-130	1.17159	0.301	0.103	1.86662e-125	0	LRGUK
AC093151.3	8.52428e-130	1.21056	0.264	0.083	2.50793e-125	0	AC093151.3
CCDC30	9.42213e-130	0.497162	0.762	0.501	2.77208e-125	0	CCDC30
CAAP1	1.30339e-129	0.594934	0.561	0.31	3.83472e-125	0	CAAP1
SLC17A5	1.36427e-129	0.556793	0.661	0.399	4.01383e-125	0	SLC17A5
AC006355.2	1.52496e-129	1.43993	0.283	0.09	4.48659e-125	0	AC006355.2
LRRK1	3.75209e-129	0.908985	0.297	0.109	1.1039e-124	0	LRRK1
SLC25A42	3.93619e-129	0.524768	0.594	0.342	1.15807e-124	0	SLC25A42
45353	4.13547e-129	0.938825	0.36	0.146	1.2167e-124	0	45353
ATP8B2	4.74214e-129	0.326012	0.581	0.346	1.39518e-124	0	ATP8B2
CTSL	4.98768e-129	0.910926	0.311	0.117	1.46742e-124	0	CTSL
GAREM1	5.01425e-129	0.460927	0.793	0.536	1.47524e-124	0	GAREM1
AC244131.2	6.21862e-129	0.775167	0.331	0.132	1.82958e-124	0	AC244131.2
NTPCR	6.42402e-129	0.65548	0.43	0.205	1.89001e-124	0	NTPCR
AC090579.1	7.12916e-129	0.772974	0.559	0.299	2.09747e-124	0	AC090579.1
CDS1	8.51847e-129	0.658427	0.629	0.364	2.50622e-124	0	CDS1
PLCXD2	9.10162e-129	1.29308	0.289	0.096	2.67779e-124	0	PLCXD2
MGAT5	9.63707e-129	0.581188	0.853	0.627	2.83532e-124	0	MGAT5
UBAC1	1.76099e-128	0.738241	0.435	0.204	5.181e-124	0	UBAC1
HDAC4	2.1237e-128	0.473215	0.845	0.601	6.24813e-124	0	HDAC4
VAV2	3.28453e-128	0.236065	0.685	0.45	9.66342e-124	0	VAV2
GAB2	3.31964e-128	0.504824	0.874	0.647	9.7667e-124	0	GAB2
KSR1	3.63856e-128	0.567992	0.706	0.443	1.0705e-123	0	KSR1
HIBADH	5.25683e-128	0.618411	0.716	0.45	1.54661e-123	0	HIBADH
RYR1	8.20243e-128	0.234774	0.484	0.271	2.41324e-123	0	RYR1
LAMC1	1.11298e-127	0.479309	0.582	0.338	3.27451e-123	0	LAMC1
PGK1	1.21907e-127	0.618189	0.488	0.253	3.58662e-123	0	PGK1
LMNA	1.24037e-127	0.619514	0.44	0.214	3.64931e-123	0	LMNA
AP3B1	2.17485e-127	0.371817	0.671	0.422	6.39864e-123	0	AP3B1
PDE7A	2.87307e-127	0.454736	0.791	0.539	8.45286e-123	0	PDE7A
SLC16A7	2.89664e-127	0.543455	0.854	0.621	8.5222e-123	0	SLC16A7
MBNL2	3.13573e-127	0.521216	0.788	0.531	9.22562e-123	0	MBNL2
SLC25A16	4.18607e-127	0.450118	0.663	0.409	1.23158e-122	0	SLC25A16
NFYC	4.56717e-127	0.518082	0.662	0.402	1.34371e-122	0	NFYC
SMAD1	6.31612e-127	0.354068	0.547	0.319	1.85827e-122	0	SMAD1
SLC25A13	6.42831e-127	0.355731	0.621	0.38	1.89127e-122	0	SLC25A13
LYPD6	6.90291e-127	0.289634	0.593	0.361	2.0309e-122	0	LYPD6
AP000787.1	7.65462e-127	1.08734	0.333	0.127	2.25207e-122	0	AP000787.1
PC	1.08552e-126	0.562554	0.392	0.184	3.19371e-122	0	PC
AC090115.1	2.53904e-126	0.519145	0.568	0.32	7.4701e-122	0	AC090115.1
ERMP1	4.29306e-126	0.494474	0.593	0.345	1.26306e-121	0	ERMP1
UQCRH	4.32905e-126	0.529498	0.52	0.284	1.27365e-121	0	UQCRH
AC011997.1	6.2184e-126	0.463478	0.385	0.177	1.82952e-121	0	AC011997.1
GLIDR	6.5413e-126	0.609284	0.531	0.286	1.92452e-121	0	GLIDR
PDE3B	1.66182e-125	0.507543	0.89	0.676	4.88925e-121	0	PDE3B
CASC2	1.98091e-125	0.784368	0.403	0.183	5.82802e-121	0	CASC2
ABCA9	3.45689e-125	0.543663	0.601	0.349	1.01705e-120	0	ABCA9
RAB12	3.5866e-125	0.270505	0.641	0.406	1.05521e-120	0	RAB12
PTPN5	3.59295e-125	0.343111	0.632	0.392	1.05708e-120	0	PTPN5
LIMA1	4.15957e-125	0.493599	0.611	0.36	1.22379e-120	0	LIMA1
ZFP64	4.54375e-125	0.666198	0.479	0.243	1.33682e-120	0	ZFP64
CTNND2	5.09505e-125	0.290127	0.991	0.976	1.49902e-120	0	CTNND2
C1GALT1	5.75579e-125	0.363683	0.563	0.33	1.69341e-120	0	C1GALT1
FNBP1L	1.28303e-124	0.308939	0.829	0.592	3.7748e-120	0	FNBP1L
DICER1-AS1	1.49862e-124	0.855403	0.332	0.135	4.40908e-120	0	DICER1-AS1
CALU	1.56243e-124	0.444557	0.52	0.292	4.59681e-120	0	CALU
LGMN	2.03524e-124	0.312454	0.498	0.28	5.98789e-120	0	LGMN
NDFIP2	2.39151e-124	0.5755	0.533	0.289	7.03606e-120	0	NDFIP2
LPXN	2.44176e-124	0.706864	0.362	0.159	7.18391e-120	0	LPXN
PDHA1	4.25391e-124	0.865595	0.407	0.183	1.25154e-119	0	PDHA1
LANCL1-AS1	4.32949e-124	1.20167	0.329	0.124	1.27378e-119	0	LANCL1-AS1
TFB1M	6.90713e-124	0.456869	0.583	0.342	2.03215e-119	0	TFB1M
LINC01250	1.13931e-123	0.441916	0.723	0.469	3.35197e-119	0	LINC01250
SRRM3	1.20586e-123	0.465808	0.947	0.803	3.54775e-119	0	SRRM3
DLGAP1-AS5	1.41654e-123	1.16516	0.366	0.147	4.16759e-119	0	DLGAP1-AS5
NUDCD1	1.48893e-123	0.363708	0.457	0.249	4.38057e-119	0	NUDCD1
ABCA1	1.85018e-123	0.45974	0.493	0.267	5.4434e-119	0	ABCA1
VCL	2.01219e-123	0.391993	0.629	0.387	5.92006e-119	0	VCL
SNRPN	2.1576e-123	0.40834	0.966	0.895	6.34788e-119	0	SNRPN
GPSM2	2.23585e-123	0.650644	0.46	0.233	6.5781e-119	0	GPSM2
VAMP1	2.64984e-123	1.07013	0.301	0.109	7.79611e-119	0	VAMP1
HOOK2	2.76267e-123	0.679196	0.636	0.375	8.12805e-119	0	HOOK2
KCNC3	3.28407e-123	0.417542	0.45	0.236	9.66206e-119	0	KCNC3
UQCRC1	3.55872e-123	0.83668	0.322	0.128	1.04701e-118	0	UQCRC1
USP40	3.59911e-123	0.366719	0.57	0.336	1.05889e-118	0	USP40
USP44	4.23076e-123	0.646076	0.314	0.13	1.24473e-118	0	USP44
ERICH1	5.0275e-123	0.459387	0.536	0.299	1.47914e-118	0	ERICH1
PFKFB3	5.53079e-123	0.538545	0.443	0.226	1.62721e-118	0	PFKFB3
CCDC138	7.92609e-123	0.353724	0.72	0.476	2.33194e-118	0	CCDC138
FSIP1	8.77955e-123	0.717637	0.468	0.234	2.58303e-118	0	FSIP1
ANKRD16	8.78028e-123	0.464962	0.592	0.349	2.58325e-118	0	ANKRD16
ZBTB1	1.0398e-122	0.475402	0.742	0.489	3.05921e-118	0	ZBTB1
GLRX	1.56745e-122	0.862566	0.293	0.11	4.6116e-118	0	GLRX
P3H2	1.64548e-122	0.311362	0.628	0.396	4.84118e-118	0	P3H2
ST8SIA5	1.84221e-122	0.187597	0.85	0.629	5.41997e-118	0	ST8SIA5
TBC1D12	2.40754e-122	0.408902	0.614	0.373	7.08321e-118	0	TBC1D12
FNIP2	2.49295e-122	0.557552	0.807	0.564	7.33452e-118	0	FNIP2
RFPL1S	3.2704e-122	0.508803	0.738	0.485	9.62185e-118	0	RFPL1S
SETD7	3.39652e-122	0.538649	0.576	0.331	9.99289e-118	0	SETD7
KCNC1	4.82278e-122	0.573248	0.834	0.604	1.41891e-117	0	KCNC1
DHDDS	5.3301e-122	0.738292	0.439	0.212	1.56817e-117	0	DHDDS
NLK	6.92918e-122	0.479036	0.82	0.577	2.03863e-117	0	NLK
ASAP2	7.82412e-122	0.369915	0.667	0.425	2.30193e-117	0	ASAP2
SYT13	8.25867e-122	0.331925	0.463	0.257	2.42978e-117	0	SYT13
ETFDH	9.79114e-122	0.607072	0.707	0.448	2.88065e-117	0	ETFDH
GAS8	1.10142e-121	0.473087	0.521	0.289	3.24048e-117	0	GAS8
ST6GAL1	1.11051e-121	0.6089	0.447	0.222	3.26723e-117	0	ST6GAL1
GEN1	1.42327e-121	0.839532	0.286	0.107	4.1874e-117	0	GEN1
UVSSA	1.49574e-121	0.508441	0.469	0.248	4.40061e-117	0	UVSSA
GVQW3	1.66925e-121	0.485188	0.44	0.227	4.91111e-117	0	GVQW3
SLC29A1	2.30845e-121	0.769645	0.337	0.141	6.79169e-117	0	SLC29A1
SYNPO2	3.25092e-121	0.635516	0.492	0.258	9.56454e-117	0	SYNPO2
IQCK	5.65426e-121	0.358337	0.608	0.375	1.66354e-116	0	IQCK
KIF13B	6.13612e-121	0.322022	0.604	0.375	1.80531e-116	0	KIF13B
BOLA3	7.11817e-121	0.918065	0.29	0.108	2.09424e-116	0	BOLA3
NDUFAF5	7.41547e-121	0.487754	0.548	0.311	2.1817e-116	0	NDUFAF5
LIMK1	8.82837e-121	0.668826	0.448	0.223	2.5974e-116	0	LIMK1
APOO	1.29061e-120	0.386841	0.626	0.388	3.79709e-116	0	APOO
KANSL1L	1.29597e-120	0.51022	0.868	0.645	3.81288e-116	0	KANSL1L
ATP5MG	1.37947e-120	0.501851	0.654	0.403	4.05854e-116	0	ATP5MG
CAPRIN2	2.38822e-120	0.420721	0.722	0.472	7.02639e-116	0	CAPRIN2
DLG1	2.51182e-120	0.288937	0.884	0.664	7.39002e-116	0	DLG1
MAP7D1	3.05303e-120	0.655394	0.476	0.245	8.98232e-116	0	MAP7D1
TFEB	4.27893e-120	1.02697	0.262	0.09	1.25891e-115	0	TFEB
C18orf25	5.444e-120	0.44401	0.622	0.377	1.60168e-115	0	C18orf25
VWA5B2	7.29382e-120	0.707626	0.37	0.166	2.14591e-115	0	VWA5B2
SPPL2B	9.62429e-120	0.57043	0.463	0.242	2.83156e-115	0	SPPL2B
KIZ	1.19022e-119	0.50728	0.793	0.547	3.50175e-115	0	KIZ
MTM1	1.6653e-119	0.426354	0.59	0.353	4.89947e-115	0	MTM1
CEP83	2.15999e-119	0.390256	0.534	0.306	6.35491e-115	0	CEP83
HSPD1	2.38513e-119	0.414579	0.562	0.329	7.0173e-115	0	HSPD1
IFT27	2.58441e-119	0.823633	0.291	0.112	7.60358e-115	0	IFT27
SLC25A26	2.62889e-119	0.421105	0.685	0.44	7.73445e-115	0	SLC25A26
DUSP10	2.86255e-119	0.561967	0.42	0.211	8.4219e-115	0	DUSP10
IFT81	3.45732e-119	0.250446	0.577	0.356	1.01718e-114	0	IFT81
GANC	3.47175e-119	0.530237	0.471	0.248	1.02142e-114	0	GANC
LYPLA1	3.89355e-119	0.532799	0.575	0.333	1.14552e-114	0	LYPLA1
ADAM23	6.02533e-119	0.541749	0.89	0.708	1.77271e-114	0	ADAM23
LRRC6	6.40569e-119	0.380417	0.711	0.469	1.88462e-114	0	LRRC6
NACC2	9.28536e-119	0.458241	0.454	0.24	2.73184e-114	0	NACC2
EFNA5	1.06542e-118	0.555166	0.866	0.653	3.13456e-114	0	EFNA5
FAM13A	1.19348e-118	0.436759	0.617	0.375	3.51132e-114	0	FAM13A
HCN2	1.72787e-118	0.753477	0.389	0.179	5.08356e-114	0	HCN2
GPR176	1.85463e-118	0.702568	0.74	0.492	5.4565e-114	0	GPR176
OSBPL6	1.87653e-118	0.39986	0.955	0.831	5.52092e-114	0	OSBPL6
EFHC1	1.92756e-118	0.354706	0.498	0.283	5.67108e-114	0	EFHC1
DZANK1	3.57456e-118	0.542744	0.482	0.259	1.05167e-113	0	DZANK1
CNTN2	4.12878e-118	0.648962	0.337	0.147	1.21473e-113	0	CNTN2
ANKMY2	4.62844e-118	0.386877	0.537	0.312	1.36173e-113	0	ANKMY2
FNDC5	5.05579e-118	1.01165	0.285	0.106	1.48746e-113	0	FNDC5
GABRA4	5.10916e-118	0.312652	0.858	0.634	1.50317e-113	0	GABRA4
IFT172	6.79421e-118	0.470092	0.703	0.454	1.99892e-113	0	IFT172
TSEN2	8.07935e-118	0.330638	0.687	0.451	2.37703e-113	0	TSEN2
CSMD1	8.08005e-118	0.148919	1	0.959	2.37723e-113	0	CSMD1
HS2ST1	1.1114e-117	0.257943	0.686	0.454	3.26985e-113	0	HS2ST1
PEPD	1.54038e-117	0.520673	0.389	0.189	4.53196e-113	0	PEPD
PECR	1.55485e-117	0.503269	0.438	0.227	4.57452e-113	0	PECR
PCNT	1.6342e-117	0.362141	0.771	0.532	4.80797e-113	0	PCNT
TMEM185A	1.97709e-117	0.637878	0.283	0.112	5.8168e-113	0	TMEM185A
FAM162A	3.13316e-117	0.565405	0.507	0.277	9.21807e-113	0	FAM162A
TTC13	3.34357e-117	0.505468	0.713	0.463	9.83712e-113	0	TTC13
FAM210A	5.44499e-117	0.457317	0.419	0.217	1.60197e-112	0	FAM210A
ARHGAP12	6.36346e-117	0.428524	0.826	0.59	1.87219e-112	0	ARHGAP12
UQCRC2	6.59332e-117	0.527139	0.722	0.471	1.93982e-112	0	UQCRC2
ZNF862	8.93049e-117	0.451266	0.494	0.275	2.62744e-112	0	ZNF862
MTHFD1L	9.60428e-117	0.443008	0.761	0.516	2.82567e-112	0	MTHFD1L
CLIP4	1.05154e-116	0.551909	0.865	0.673	3.09372e-112	0	CLIP4
AC026316.5	1.08067e-116	0.599872	0.385	0.179	3.17945e-112	0	AC026316.5
DLAT	1.18946e-116	0.682769	0.423	0.207	3.4995e-112	0	DLAT
DAB2IP	1.50569e-116	0.182714	0.505	0.307	4.42988e-112	0	DAB2IP
MPPE1	2.07464e-116	0.667601	0.436	0.217	6.10381e-112	0	MPPE1
CC2D2A	2.08037e-116	0.336135	0.635	0.406	6.12065e-112	0	CC2D2A
EVL	2.09882e-116	0.475042	0.916	0.745	6.17493e-112	0	EVL
PTPRG	2.5126e-116	0.413828	0.974	0.912	7.39231e-112	0	PTPRG
FDX1	2.8478e-116	0.518862	0.419	0.215	8.37851e-112	0	FDX1
TTLL11	2.90077e-116	0.484965	0.83	0.596	8.53435e-112	0	TTLL11
PITPNA	3.94936e-116	0.427459	0.641	0.4	1.16194e-111	0	PITPNA
ZNF536	4.62249e-116	0.203452	0.979	0.828	1.35998e-111	0	ZNF536
AC025887.2	4.83939e-116	1.25329	0.253	0.081	1.4238e-111	0	AC025887.2
MORN1	5.14854e-116	0.802513	0.323	0.134	1.51475e-111	0	MORN1
PKNOX2	5.92609e-116	0.409496	0.914	0.719	1.74352e-111	0	PKNOX2
PLXNC1	6.75662e-116	0.29289	0.697	0.466	1.98786e-111	0	PLXNC1
LINC00862	1.3145e-115	0.53172	0.409	0.207	3.8674e-111	0	LINC00862
MSRB3	1.33483e-115	0.359334	0.622	0.389	3.92722e-111	0	MSRB3
ATP6AP1L	1.69913e-115	0.436083	0.617	0.38	4.99902e-111	0	ATP6AP1L
TRIM66	2.13269e-115	0.531838	0.387	0.19	6.27459e-111	0	TRIM66
NBN	2.85758e-115	0.260863	0.528	0.315	8.40729e-111	0	NBN
PRPF40B	3.44194e-115	0.360809	0.705	0.467	1.01265e-110	0	PRPF40B
EML2	4.38892e-115	0.455038	0.67	0.426	1.29126e-110	0	EML2
SNX24	4.45547e-115	0.462625	0.673	0.427	1.31084e-110	0	SNX24
CERK	5.57826e-115	0.330575	0.447	0.245	1.64118e-110	0	CERK
ACOT9	6.11301e-115	0.635754	0.356	0.163	1.79851e-110	0	ACOT9
ELAVL4	7.07397e-115	0.438676	0.842	0.613	2.08123e-110	0	ELAVL4
HELQ	7.71139e-115	0.415968	0.427	0.225	2.26877e-110	0	HELQ
IDI2-AS1	8.42568e-115	0.654188	0.346	0.156	2.47892e-110	0	IDI2-AS1
USP6NL	9.83931e-115	0.423154	0.418	0.218	2.89482e-110	0	USP6NL
ANKRD24	1.28078e-114	0.367789	0.469	0.26	3.76819e-110	0	ANKRD24
POT1	1.6511e-114	0.353392	0.586	0.36	4.85769e-110	0	POT1
PACSIN1	1.67296e-114	0.423243	0.685	0.444	4.92202e-110	0	PACSIN1
LRCH1	1.74584e-114	0.505575	0.862	0.65	5.13645e-110	0	LRCH1
PXDNL	2.22279e-114	0.955697	0.555	0.307	6.53966e-110	0	PXDNL
CTNNBL1	2.45859e-114	0.305472	0.623	0.397	7.2334e-110	0	CTNNBL1
ABHD17C	2.72234e-114	0.502719	0.417	0.213	8.00939e-110	0	ABHD17C
RALA	3.22551e-114	0.419753	0.567	0.339	9.48979e-110	0	RALA
CHCHD10	3.70079e-114	0.797535	0.358	0.157	1.08881e-109	0	CHCHD10
NUP93	4.07826e-114	0.472251	0.765	0.521	1.19986e-109	0	NUP93
TDRP	6.91498e-114	0.133379	0.54	0.347	2.03446e-109	0	TDRP
PARD6G	7.30775e-114	0.867776	0.337	0.142	2.15001e-109	0	PARD6G
AK9	8.33843e-114	0.430538	0.56	0.331	2.45325e-109	0	AK9
GTF3C3	9.01397e-114	0.405561	0.464	0.256	2.652e-109	0	GTF3C3
SDHA	1.31797e-113	0.304979	0.608	0.383	3.87761e-109	0	SDHA
POM121	2.28876e-113	0.371118	0.715	0.478	6.73376e-109	0	POM121
ATR	2.34412e-113	0.498635	0.805	0.568	6.89662e-109	0	ATR
TMEM120B	2.60403e-113	0.352664	0.652	0.422	7.66133e-109	0	TMEM120B
SLC6A6	2.69484e-113	0.257494	0.5	0.296	7.92848e-109	0	SLC6A6
BRSK1	3.66983e-113	0.25007	0.46	0.264	1.0797e-108	0	BRSK1
NDUFA12	6.83622e-113	0.711624	0.368	0.168	2.01128e-108	0	NDUFA12
CTPS1	6.96963e-113	0.535619	0.375	0.183	2.05053e-108	0	CTPS1
TFRC	9.01265e-113	0.513825	0.438	0.227	2.65161e-108	0	TFRC
NMNAT1	1.01346e-112	0.761586	0.336	0.144	2.98169e-108	0	NMNAT1
GATB	1.04652e-112	0.734636	0.408	0.197	3.07898e-108	0	GATB
PDZD8	1.39877e-112	0.322352	0.658	0.428	4.11533e-108	0	PDZD8
HPS4	1.49056e-112	0.482994	0.516	0.29	4.38537e-108	0	HPS4
RHEB	1.52192e-112	0.416575	0.601	0.37	4.47765e-108	0	RHEB
PITPNM3	1.57502e-112	0.259448	0.533	0.328	4.63386e-108	0	PITPNM3
FGGY	1.82812e-112	0.487585	0.595	0.359	5.37852e-108	0	FGGY
LINC00476	1.84076e-112	0.368219	0.709	0.472	5.41571e-108	0	LINC00476
ACVR1	1.88768e-112	0.115553	0.467	0.282	5.55374e-108	0	ACVR1
SCRT1	1.96926e-112	0.708293	0.301	0.125	5.79375e-108	0	SCRT1
RSPH3	1.97814e-112	0.556275	0.465	0.249	5.8199e-108	0	RSPH3
TRUB1	2.04464e-112	0.700766	0.44	0.224	6.01554e-108	0	TRUB1
USP8	2.13132e-112	0.22644	0.718	0.493	6.27055e-108	0	USP8
RAPGEF4	2.24889e-112	0.369618	0.967	0.89	6.61646e-108	0	RAPGEF4
ABHD18	2.29573e-112	0.372145	0.812	0.58	6.75427e-108	0	ABHD18
KIF16B	2.5202e-112	0.500656	0.819	0.589	7.41467e-108	0	KIF16B
COX5A	3.1976e-112	0.777101	0.322	0.136	9.40766e-108	0	COX5A
MGST2	3.77498e-112	0.610791	0.424	0.214	1.11064e-107	0	MGST2
CFAP221	4.49313e-112	0.318224	0.485	0.281	1.32192e-107	0	CFAP221
SNAPC1	5.15298e-112	0.555595	0.315	0.14	1.51606e-107	0	SNAPC1
KLHL18	5.22829e-112	0.442968	0.477	0.263	1.53821e-107	0	KLHL18
BARD1	7.21662e-112	0.846479	0.262	0.097	2.1232e-107	0	BARD1
AUH	7.40478e-112	0.530078	0.861	0.661	2.17856e-107	0	AUH
DNAJC11	7.80153e-112	0.473964	0.6	0.364	2.29529e-107	0	DNAJC11
PDE8A	8.39513e-112	0.441742	0.84	0.614	2.46993e-107	0	PDE8A
ZRANB3	8.80313e-112	0.382669	0.683	0.448	2.58997e-107	0	ZRANB3
GLMN	9.8134e-112	0.38024	0.723	0.484	2.8872e-107	0	GLMN
TANK	9.85569e-112	0.262609	0.663	0.444	2.89964e-107	0	TANK
IPO9-AS1	1.00467e-111	0.728473	0.421	0.205	2.95583e-107	0	IPO9-AS1
MINK1	1.04877e-111	0.502367	0.527	0.302	3.08558e-107	0	MINK1
FGD4	1.09915e-111	0.595708	0.699	0.45	3.2338e-107	0	FGD4
NDUFS1	1.39663e-111	0.502931	0.813	0.581	4.10902e-107	0	NDUFS1
AC092378.1	1.51191e-111	0.493416	0.522	0.296	4.44818e-107	0	AC092378.1
ASNS	1.67025e-111	0.371194	0.541	0.321	4.91405e-107	0	ASNS
NARF	1.78227e-111	0.62108	0.535	0.3	5.24363e-107	0	NARF
NF1	1.81859e-111	0.383789	0.961	0.896	5.35046e-107	0	NF1
TUBGCP5	1.94914e-111	0.309199	0.594	0.374	5.73457e-107	0	TUBGCP5
FBXO38	2.73174e-111	0.388052	0.545	0.323	8.03705e-107	0	FBXO38
EIF3E	2.77007e-111	0.624699	0.57	0.327	8.14983e-107	0	EIF3E
ACSL3	3.49872e-111	0.577529	0.829	0.618	1.02936e-106	0	ACSL3
RNPS1	4.91944e-111	0.396812	0.616	0.383	1.44735e-106	0	RNPS1
BDH1	5.72527e-111	0.426294	0.72	0.481	1.68443e-106	0	BDH1
SLC27A4	5.73671e-111	0.544894	0.495	0.274	1.6878e-106	0	SLC27A4
AC104827.1	8.09584e-111	0.79155	0.407	0.194	2.38188e-106	0	AC104827.1
AMOTL1	8.2481e-111	0.500973	0.699	0.454	2.42667e-106	0	AMOTL1
TMEM165	9.18049e-111	0.283996	0.698	0.472	2.70099e-106	0	TMEM165
CACNA1G	1.09393e-110	0.241791	0.363	0.193	3.21844e-106	0	CACNA1G
MPP5	1.30166e-110	0.419169	0.509	0.292	3.82962e-106	0	MPP5
RAD52	1.52029e-110	0.420691	0.584	0.356	4.47286e-106	0	RAD52
RBM45	1.69479e-110	0.386337	0.488	0.278	4.98623e-106	0	RBM45
ZNF658	1.87566e-110	0.688032	0.349	0.158	5.51838e-106	0	ZNF658
PFKFB2	1.97385e-110	1.03914	0.256	0.09	5.80726e-106	0	PFKFB2
SLC7A1	2.02433e-110	0.193696	0.455	0.271	5.95577e-106	0	SLC7A1
CCDC180	2.17431e-110	0.241325	0.56	0.354	6.39703e-106	0	CCDC180
ABCA6	2.8805e-110	0.430974	0.612	0.378	8.47471e-106	0	ABCA6
AL139352.1	2.9283e-110	0.816252	0.293	0.118	8.61536e-106	0	AL139352.1
AL139393.1	3.46226e-110	0.552682	0.443	0.231	1.01863e-105	0	AL139393.1
RHOXF1-AS1	3.61712e-110	0.281456	0.544	0.332	1.06419e-105	0	RHOXF1-AS1
DOPEY2	5.04349e-110	0.317241	0.583	0.367	1.48385e-105	0	DOPEY2
MTMR4	5.05257e-110	0.531743	0.533	0.304	1.48652e-105	0	MTMR4
SUSD6	5.70072e-110	0.400824	0.39	0.202	1.67721e-105	0	SUSD6
SLC6A17	6.05613e-110	0.346109	0.662	0.434	1.78177e-105	0	SLC6A17
NSF	6.58186e-110	0.437994	0.947	0.843	1.93645e-105	0	NSF
POU6F2	6.59018e-110	0.291349	0.353	0.17	1.9389e-105	0	POU6F2
MYO18A	7.27594e-110	0.433823	0.502	0.286	2.14065e-105	0	MYO18A
GPC6	8.34274e-110	0.802517	0.656	0.422	2.45452e-105	0	GPC6
UQCC1	8.80103e-110	0.38878	0.756	0.52	2.58935e-105	0	UQCC1
MGST3	8.95256e-110	0.469589	0.758	0.519	2.63393e-105	0	MGST3
SERPINB9	8.96265e-110	0.425268	0.419	0.224	2.6369e-105	0	SERPINB9
MAEA	9.45327e-110	0.579766	0.47	0.253	2.78125e-105	0	MAEA
KIRREL3	9.97234e-110	0.342429	0.831	0.606	2.93396e-105	0	KIRREL3
NDUFA10	1.13199e-109	0.508809	0.806	0.574	3.33043e-105	0	NDUFA10
PJVK	1.18453e-109	0.733391	0.27	0.106	3.48501e-105	0	PJVK
ZNF641	1.36113e-109	0.277863	0.418	0.235	4.00459e-105	0	ZNF641
TMEM14A	1.41259e-109	0.573699	0.421	0.216	4.15597e-105	0	TMEM14A
COG7	1.42011e-109	0.416847	0.583	0.356	4.1781e-105	0	COG7
PPP2R2D	1.85336e-109	0.369259	0.646	0.415	5.45276e-105	0	PPP2R2D
45541	1.85871e-109	0.200887	0.647	0.435	5.4685e-105	0	45541
NSMCE2	2.66704e-109	0.494629	0.87	0.667	7.84671e-105	0	NSMCE2
BCL2L1	3.30161e-109	0.310133	0.507	0.305	9.71367e-105	0	BCL2L1
FAHD2B	3.66523e-109	0.69403	0.275	0.112	1.07835e-104	0	FAHD2B
LMBR1	4.32501e-109	0.508874	0.857	0.649	1.27246e-104	0	LMBR1
CPEB2-DT	5.17579e-109	0.520127	0.456	0.246	1.52277e-104	0	CPEB2-DT
ZDHHC13	6.26978e-109	0.41031	0.556	0.333	1.84463e-104	0	ZDHHC13
AL158071.4	6.29262e-109	0.593885	0.33	0.151	1.85135e-104	0	AL158071.4
TRAF3IP1	6.94437e-109	0.247382	0.601	0.387	2.0431e-104	0	TRAF3IP1
ULK3	7.47399e-109	0.634761	0.4	0.198	2.19892e-104	0	ULK3
LINC00504	9.05194e-109	0.80458	0.36	0.161	2.66317e-104	0	LINC00504
PALLD	1.12031e-108	0.461378	0.851	0.634	3.29605e-104	0	PALLD
KAT2A	1.14835e-108	0.309082	0.444	0.254	3.37857e-104	0	KAT2A
PKIB	1.20196e-108	0.83817	0.292	0.117	3.53628e-104	0	PKIB
SLC9A8	1.20237e-108	0.465308	0.486	0.273	3.53748e-104	0	SLC9A8
SYBU	1.21651e-108	0.270177	0.859	0.647	3.57911e-104	0	SYBU
EML4	1.63577e-108	0.281192	0.641	0.425	4.81261e-104	0	EML4
MAT2A	2.24823e-108	0.321911	0.569	0.353	6.61453e-104	0	MAT2A
FOXRED1	2.50817e-108	0.658996	0.423	0.215	7.3793e-104	0	FOXRED1
PANK1	2.77242e-108	0.65001	0.483	0.261	8.15673e-104	0	PANK1
INPP5A	2.92881e-108	0.416791	0.649	0.416	8.61684e-104	0	INPP5A
UBE2E1	3.90298e-108	0.333827	0.639	0.415	1.1483e-103	0	UBE2E1
ELMOD1	4.32939e-108	0.12245	0.762	0.557	1.27375e-103	0	ELMOD1
SHLD2	4.45484e-108	0.307549	0.646	0.421	1.31066e-103	0	SHLD2
GRK5	5.47365e-108	0.295653	0.588	0.374	1.6104e-103	0	GRK5
SLC37A3	6.29072e-108	0.222593	0.506	0.313	1.85079e-103	0	SLC37A3
PRMT3	6.29866e-108	0.508005	0.677	0.435	1.85313e-103	0	PRMT3
KRTAP5-AS1	7.90439e-108	0.249418	0.521	0.317	2.32555e-103	0	KRTAP5-AS1
MCF2	8.41025e-108	0.326686	0.414	0.229	2.47438e-103	0	MCF2
BEND6	9.43623e-108	0.566958	0.798	0.571	2.77623e-103	0	BEND6
CDC42EP3	9.54112e-108	0.534625	0.477	0.262	2.80709e-103	0	CDC42EP3
TRIM69	9.59178e-108	0.411441	0.424	0.229	2.822e-103	0	TRIM69
METAP2	9.80284e-108	0.342427	0.578	0.359	2.88409e-103	0	METAP2
SDHC	1.02957e-107	0.262537	0.645	0.427	3.02911e-103	0	SDHC
FGFR1	1.17853e-107	0.578226	0.369	0.179	3.46735e-103	0	FGFR1
HABP4	1.74036e-107	0.358986	0.583	0.362	5.12033e-103	0	HABP4
CTBP2	1.77038e-107	0.207993	0.534	0.334	5.20863e-103	0	CTBP2
ADAM17	1.79388e-107	0.379837	0.642	0.413	5.27777e-103	0	ADAM17
SNX7	2.02466e-107	0.33913	0.45	0.253	5.95676e-103	0	SNX7
SORL1	2.10964e-107	0.242687	0.701	0.483	6.20677e-103	0	SORL1
TMEM72-AS1	2.42622e-107	0.409308	0.557	0.337	7.13817e-103	0	TMEM72-AS1
MTERF1	3.00133e-107	0.515019	0.634	0.395	8.83023e-103	0	MTERF1
DLST	3.41305e-107	0.478285	0.43	0.227	1.00415e-102	0	DLST
FGFR1OP	3.58914e-107	0.378874	0.695	0.463	1.05596e-102	0	FGFR1OP
PCDH19	4.42031e-107	0.122887	0.57	0.375	1.3005e-102	0	PCDH19
TTC23L	5.15117e-107	0.930902	0.304	0.125	1.51553e-102	0	TTC23L
AP003555.3	5.61505e-107	0.122322	0.301	0.161	1.652e-102	0	AP003555.3
RAMP1	6.22559e-107	0.11892	0.421	0.252	1.83163e-102	0	RAMP1
CISD1	6.71246e-107	0.386163	0.536	0.322	1.97487e-102	0	CISD1
CKMT2	7.44556e-107	1.05135	0.266	0.097	2.19056e-102	0	CKMT2
RUBCN	8.26415e-107	0.319204	0.728	0.501	2.4314e-102	0	RUBCN
ARG2	8.68795e-107	0.61271	0.474	0.255	2.55608e-102	0	ARG2
GK	1.08518e-106	0.430572	0.538	0.32	3.19269e-102	0	GK
WDR11	1.15143e-106	0.291541	0.605	0.391	3.38763e-102	0	WDR11
ZFYVE16	1.28686e-106	0.341997	0.878	0.669	3.78606e-102	0	ZFYVE16
PPP2R3A	1.4817e-106	0.465935	0.666	0.429	4.35932e-102	0	PPP2R3A
CAMK2G	1.51488e-106	0.476348	0.804	0.575	4.45691e-102	0	CAMK2G
RTN4IP1	1.52946e-106	0.583166	0.385	0.191	4.49984e-102	0	RTN4IP1
ABHD17B	1.54102e-106	0.473345	0.449	0.245	4.53384e-102	0	ABHD17B
AC011603.2	1.56932e-106	0.497488	0.41	0.212	4.61709e-102	0	AC011603.2
DGKD	1.86466e-106	0.304911	0.86	0.645	5.48601e-102	0	DGKD
HERC3	2.76893e-106	0.256092	0.686	0.468	8.14648e-102	0	HERC3
IFFO1	2.9281e-106	0.680696	0.323	0.144	8.61477e-102	0	IFFO1
ZNF595	2.95264e-106	0.251255	0.519	0.317	8.68697e-102	0	ZNF595
COX6C	3.21144e-106	0.417642	0.512	0.299	9.44838e-102	0	COX6C
DESI2	3.2938e-106	0.132635	0.43	0.259	9.69069e-102	0	DESI2
FAM173B	3.80395e-106	0.368403	0.51	0.304	1.11916e-101	0	FAM173B
LCLAT1	4.44797e-106	0.275752	0.733	0.512	1.30864e-101	0	LCLAT1
GPATCH2	4.66853e-106	0.303427	0.613	0.395	1.37353e-101	0	GPATCH2
MMS19	4.96823e-106	0.315623	0.552	0.342	1.4617e-101	0	MMS19
ORMDL1	5.36113e-106	0.293855	0.56	0.35	1.5773e-101	0	ORMDL1
MAP3K9	7.37413e-106	0.3565	0.69	0.461	2.16954e-101	0	MAP3K9
LYRM4	7.48563e-106	0.194368	0.619	0.413	2.20235e-101	0	LYRM4
SEC16B	8.30125e-106	1.07265	0.272	0.101	2.44231e-101	0	SEC16B
AFG3L2	8.39419e-106	0.321517	0.529	0.32	2.46965e-101	0	AFG3L2
DHRSX	9.9555e-106	0.271936	0.696	0.477	2.92901e-101	0	DHRSX
ELP1	1.02836e-105	0.35847	0.661	0.435	3.02554e-101	0	ELP1
RIMS4	1.25228e-105	0.637865	0.439	0.229	3.68434e-101	0	RIMS4
ATP5F1A	1.37462e-105	0.481091	0.495	0.281	4.04427e-101	0	ATP5F1A
CKMT2-AS1	1.45406e-105	0.19141	0.647	0.439	4.27798e-101	0	CKMT2-AS1
ZFAND6	1.45768e-105	0.399599	0.482	0.276	4.28864e-101	0	ZFAND6
AC027018.1	1.68596e-105	1.03649	0.358	0.157	4.96027e-101	0	AC027018.1
CCDC191	1.87365e-105	0.485114	0.445	0.239	5.51248e-101	0	CCDC191
AC068051.1	2.0724e-105	0.414288	0.366	0.187	6.09721e-101	0	AC068051.1
NDUFV1	2.10082e-105	0.696541	0.426	0.216	6.18082e-101	0	NDUFV1
AC069228.1	2.17046e-105	1.04788	0.38	0.172	6.38571e-101	0	AC069228.1
COX5B	2.23668e-105	0.840535	0.311	0.131	6.58053e-101	0	COX5B
ATP2B3	2.32138e-105	0.180421	0.471	0.288	6.82975e-101	0	ATP2B3
RRP12	2.6047e-105	0.535735	0.33	0.155	7.6633e-101	0	RRP12
LINC01473	3.45521e-105	0.521911	0.37	0.183	1.01656e-100	0	LINC01473
DYNC1LI1	3.74907e-105	0.180314	0.636	0.432	1.10301e-100	0	DYNC1LI1
PLEKHA8	4.46444e-105	0.434293	0.493	0.283	1.31348e-100	0	PLEKHA8
FSTL1	4.97452e-105	0.41634	0.323	0.157	1.46355e-100	0	FSTL1
CEP63	5.87785e-105	0.223686	0.679	0.464	1.72932e-100	0	CEP63
RUSC2	6.8264e-105	0.186381	0.708	0.498	2.00839e-100	0	RUSC2
PCDH1	6.95666e-105	0.789847	0.274	0.108	2.04672e-100	0	PCDH1
UBXN2B	7.82338e-105	0.262698	0.673	0.453	2.30172e-100	0	UBXN2B
CHD6	8.33932e-105	0.458325	0.915	0.775	2.45351e-100	0	CHD6
RIMKLA	8.62323e-105	0.427287	0.487	0.282	2.53704e-100	0	RIMKLA
OSTF1	8.95143e-105	0.56103	0.256	0.106	2.6336e-100	0	OSTF1
GGT7	1.08121e-104	0.388222	0.714	0.484	3.18102e-100	0	GGT7
KLC4	1.36382e-104	0.422243	0.445	0.247	4.01249e-100	0	KLC4
UBA3	1.46088e-104	0.408492	0.625	0.398	4.29806e-100	0	UBA3
TMEM51	1.47043e-104	0.726013	0.276	0.114	4.32615e-100	0	TMEM51
GMCL1	1.58844e-104	0.176338	0.657	0.449	4.67335e-100	0	GMCL1
AP001831.1	1.8824e-104	0.826285	0.473	0.248	5.53821e-100	0	AP001831.1
CLDN12	1.883e-104	0.191165	0.563	0.364	5.53998e-100	0	CLDN12
MOK	2.32156e-104	0.241912	0.631	0.417	6.83027e-100	0	MOK
ELOVL4	2.71113e-104	0.430016	0.546	0.326	7.97642e-100	0	ELOVL4
SS18	2.72401e-104	0.239854	0.509	0.315	8.01431e-100	0	SS18
BORCS5	2.72712e-104	0.271755	0.603	0.392	8.02347e-100	0	BORCS5
EIF4E1B	3.16755e-104	0.625442	0.297	0.128	9.31925e-100	0	EIF4E1B
MRPS5	3.58472e-104	0.353648	0.641	0.416	1.05466e-99	0	MRPS5
PARN	3.8228e-104	0.314397	0.659	0.437	1.1247e-99	0	PARN
SRSF7	4.01764e-104	0.457551	0.642	0.409	1.18203e-99	0	SRSF7
PPARGC1B	4.70599e-104	0.281973	0.581	0.372	1.38455e-99	0	PPARGC1B
LIAS	5.03526e-104	0.489331	0.412	0.219	1.48143e-99	0	LIAS
TTBK2	5.32368e-104	0.457934	0.914	0.768	1.56628e-99	0	TTBK2
TRIM9	6.02184e-104	0.302453	0.968	0.856	1.77169e-99	0	TRIM9
RMDN2	6.64356e-104	0.51438	0.459	0.251	1.9546e-99	0	RMDN2
MYH14	7.0456e-104	0.431011	0.433	0.237	2.07288e-99	0	MYH14
NAPEPLD	7.19626e-104	0.435594	0.615	0.389	2.11721e-99	0	NAPEPLD
POGLUT1	8.47385e-104	0.444849	0.438	0.241	2.49309e-99	0	POGLUT1
TRMU	8.58095e-104	0.442005	0.387	0.201	2.5246e-99	0	TRMU
WDPCP	8.89639e-104	0.510093	0.908	0.772	2.61741e-99	0	WDPCP
AP5M1	9.48342e-104	0.375491	0.57	0.353	2.79012e-99	0	AP5M1
ASCC1	1.21441e-103	0.149394	0.634	0.434	3.57291e-99	0	ASCC1
PDCD10	1.38703e-103	0.453808	0.492	0.284	4.08078e-99	0	PDCD10
INTS6-AS1	1.429e-103	0.520617	0.325	0.153	4.20425e-99	0	INTS6-AS1
TTL	1.43638e-103	0.261843	0.465	0.277	4.22596e-99	0	TTL
DGKZ	1.46076e-103	0.28281	0.663	0.445	4.29771e-99	0	DGKZ
CNTNAP1	1.53665e-103	0.630411	0.434	0.227	4.52096e-99	0	CNTNAP1
AL035530.2	1.5613e-103	0.366148	0.656	0.43	4.59349e-99	0	AL035530.2
NUBPL	1.65533e-103	0.400119	0.789	0.562	4.87014e-99	0	NUBPL
FAM192A	1.86197e-103	0.35811	0.417	0.233	5.4781e-99	0	FAM192A
ZNF717	1.95576e-103	0.373814	0.549	0.337	5.75405e-99	0	ZNF717
C2CD3	2.34724e-103	0.431419	0.64	0.409	6.90581e-99	0	C2CD3
MREG	2.43922e-103	0.485787	0.341	0.166	7.17643e-99	0	MREG
KLHL20	2.8078e-103	0.315719	0.542	0.333	8.26082e-99	0	KLHL20
SLC38A9	2.92438e-103	0.121444	0.603	0.413	8.60383e-99	0	SLC38A9
CYP46A1	2.97152e-103	0.251354	0.576	0.367	8.74249e-99	0	CYP46A1
CLYBL	2.99401e-103	0.470741	0.474	0.267	8.80867e-99	0	CLYBL
PSME4	3.06752e-103	0.427776	0.749	0.518	9.02495e-99	0	PSME4
ZNF41	3.24957e-103	0.428055	0.399	0.209	9.56056e-99	0	ZNF41
LRRC34	3.26573e-103	0.639707	0.304	0.135	9.60811e-99	0	LRRC34
ZNF385A	3.64197e-103	0.575341	0.31	0.141	1.0715e-98	0	ZNF385A
RAD54L2	3.81913e-103	0.30739	0.624	0.407	1.12362e-98	0	RAD54L2
ABHD6	3.85617e-103	0.309997	0.554	0.345	1.13452e-98	0	ABHD6
RAPGEF4-AS1	3.98712e-103	0.831384	0.291	0.12	1.17305e-98	0	RAPGEF4-AS1
FAM222A	4.45761e-103	0.776008	0.284	0.119	1.31147e-98	0	FAM222A
PDPR	4.94175e-103	0.199115	0.515	0.322	1.45391e-98	0	PDPR
LINC02256	5.84218e-103	0.280882	0.553	0.35	1.71883e-98	0	LINC02256
ACOT7	5.88407e-103	0.105297	0.595	0.408	1.73115e-98	0	ACOT7
MRPS16	7.25975e-103	0.415791	0.392	0.209	2.13589e-98	0	MRPS16
EIF3K	7.3069e-103	0.472714	0.494	0.283	2.14976e-98	0	EIF3K
EED	7.45641e-103	0.358144	0.467	0.268	2.19375e-98	0	EED
CASKIN1	7.5283e-103	0.164595	0.57	0.369	2.2149e-98	0	CASKIN1
CPT1C	7.55838e-103	0.352399	0.53	0.323	2.22375e-98	0	CPT1C
DDX10	7.99675e-103	0.229776	0.742	0.531	2.35272e-98	0	DDX10
NARS2	8.92962e-103	0.207717	0.611	0.405	2.62718e-98	0	NARS2
UHRF1BP1	9.92268e-103	0.286278	0.682	0.462	2.91935e-98	0	UHRF1BP1
KIAA0556	1.12233e-102	0.177864	0.57	0.372	3.302e-98	0	KIAA0556
AK3	1.21056e-102	0.323442	0.67	0.447	3.56159e-98	0	AK3
UBP1	1.27503e-102	0.127049	0.624	0.431	3.75127e-98	0	UBP1
DCLK2	1.58547e-102	0.409618	0.916	0.749	4.66462e-98	0	DCLK2
PHKA1	3.74375e-102	0.467679	0.296	0.138	1.10145e-97	0	PHKA1
TTC8	5.04426e-102	0.246479	0.641	0.429	1.48407e-97	0	TTC8
SULT4A1	5.26067e-102	0.105932	0.597	0.405	1.54774e-97	0	SULT4A1
UBAP1L	6.43878e-102	0.202396	0.667	0.461	1.89435e-97	0	UBAP1L
DDX25	8.44028e-102	0.277207	0.457	0.272	2.48322e-97	0	DDX25
PXYLP1	8.49771e-102	0.307702	0.586	0.374	2.50011e-97	0	PXYLP1
PNMA3	1.05018e-101	0.308283	0.454	0.262	3.08975e-97	0	PNMA3
ITFG2	1.06129e-101	0.511699	0.465	0.258	3.12242e-97	0	ITFG2
CDKL3	1.18867e-101	0.144135	0.603	0.407	3.49718e-97	0	CDKL3
LUZP2	1.22738e-101	0.765313	0.7	0.473	3.61106e-97	0	LUZP2
ABCA3	1.28724e-101	0.263383	0.715	0.502	3.78718e-97	0	ABCA3
ARMCX3	1.45961e-101	0.442103	0.42	0.228	4.29432e-97	0	ARMCX3
KAT8	1.47599e-101	0.372266	0.418	0.231	4.34251e-97	0	KAT8
AP000311.1	1.53557e-101	0.807312	0.475	0.252	4.5178e-97	0	AP000311.1
NTAN1	1.6295e-101	0.570296	0.315	0.146	4.79415e-97	0	NTAN1
WDR75	1.66057e-101	0.397912	0.546	0.331	4.88557e-97	0	WDR75
GBA2	1.77866e-101	0.611097	0.354	0.171	5.23299e-97	0	GBA2
PRKAA1	1.99957e-101	0.407936	0.462	0.263	5.88292e-97	0	PRKAA1
ZNRF1	2.08357e-101	0.108746	0.651	0.46	6.13008e-97	0	ZNRF1
TMEM67	2.11192e-101	0.12229	0.475	0.295	6.21349e-97	0	TMEM67
AC078785.1	2.93415e-101	0.376634	0.471	0.272	8.63256e-97	0	AC078785.1
TSGA10	3.25242e-101	0.183853	0.679	0.472	9.56893e-97	0	TSGA10
EVI5	3.56792e-101	0.433967	0.886	0.699	1.04972e-96	0	EVI5
MTFMT	4.15398e-101	0.297039	0.56	0.352	1.22214e-96	0	MTFMT
TAB1	4.50342e-101	0.352424	0.436	0.246	1.32495e-96	0	TAB1
INTS9	4.68224e-101	0.279411	0.517	0.321	1.37756e-96	0	INTS9
SLC7A6	5.20526e-101	0.384667	0.558	0.345	1.53144e-96	0	SLC7A6
DOK6	5.853e-101	0.469426	0.926	0.777	1.72201e-96	0	DOK6
RNF34	6.70298e-101	0.227142	0.517	0.322	1.97208e-96	0	RNF34
VDAC3	7.10065e-101	0.49967	0.577	0.35	2.08908e-96	0	VDAC3
ANAPC4	8.14961e-101	0.138866	0.626	0.431	2.3977e-96	0	ANAPC4
SSFA2	9.46046e-101	0.248619	0.64	0.43	2.78336e-96	0	SSFA2
BICDL1	1.05188e-100	0.470646	0.817	0.599	3.09474e-96	0	BICDL1
SLC25A27	1.05536e-100	0.368754	0.709	0.482	3.10498e-96	0	SLC25A27
POLR3B	1.06626e-100	0.356527	0.472	0.275	3.13703e-96	0	POLR3B
TMEM169	1.11167e-100	0.776233	0.308	0.133	3.27065e-96	0	TMEM169
CHGA	1.22058e-100	0.57143	0.39	0.196	3.59107e-96	0	CHGA
LDAH	1.22423e-100	0.328884	0.683	0.462	3.60179e-96	0	LDAH
DELE1	1.24061e-100	0.185528	0.563	0.37	3.65001e-96	0	DELE1
AC009126.1	1.459e-100	0.169082	0.66	0.46	4.29252e-96	0	AC009126.1
IGF2R	1.79726e-100	0.289038	0.651	0.435	5.28772e-96	0	IGF2R
JAZF1	1.84497e-100	0.402933	0.938	0.828	5.42807e-96	0	JAZF1
NDUFS2	2.17837e-100	0.318375	0.388	0.212	6.40899e-96	0	NDUFS2
IFT88	2.74936e-100	0.20688	0.706	0.497	8.08889e-96	0	IFT88
SNF8	2.80688e-100	0.481986	0.367	0.187	8.25811e-96	0	SNF8
GABRA1	2.88592e-100	0.243774	0.837	0.631	8.49065e-96	0	GABRA1
PIGX	3.05884e-100	0.387419	0.408	0.224	8.99941e-96	0	PIGX
NCOA2	3.52111e-100	0.404962	0.951	0.862	1.03595e-95	0	NCOA2
MRPL1	3.99199e-100	0.231772	0.474	0.29	1.17448e-95	0	MRPL1
IL17D	4.61348e-100	0.47576	0.339	0.166	1.35733e-95	0	IL17D
ARID5B	4.72064e-100	0.29332	0.888	0.691	1.38886e-95	0	ARID5B
ATP13A2	4.72429e-100	0.334673	0.614	0.399	1.38993e-95	0	ATP13A2
AL391807.1	4.86969e-100	0.43383	0.663	0.438	1.43271e-95	0	AL391807.1
HSD17B11	4.88431e-100	0.658849	0.307	0.139	1.43701e-95	0	HSD17B11
MCU	5.03944e-100	0.173518	0.667	0.466	1.48265e-95	0	MCU
ANKMY1	5.46121e-100	0.150779	0.487	0.307	1.60674e-95	0	ANKMY1
SLC6A1-AS1	5.67449e-100	0.452664	0.565	0.345	1.66949e-95	0	SLC6A1-AS1
DNAJC15	5.73356e-100	0.338225	0.463	0.273	1.68687e-95	0	DNAJC15
SYT12	6.39441e-100	0.470097	0.416	0.225	1.8813e-95	0	SYT12
ACAA1	6.41003e-100	0.42729	0.333	0.166	1.8859e-95	0	ACAA1
GLUD1	6.46417e-100	0.228931	0.546	0.346	1.90182e-95	0	GLUD1
MAP2K2	7.52606e-100	0.301585	0.409	0.228	2.21424e-95	0	MAP2K2
ZC3H15	7.99607e-100	0.200836	0.567	0.371	2.35252e-95	0	ZC3H15
PIK3R4	1.01321e-99	0.324513	0.435	0.25	2.98096e-95	0	PIK3R4
KCNK3	1.22022e-99	0.253313	0.352	0.189	3.59e-95	0	KCNK3
ARMC9	1.33631e-99	0.235159	0.715	0.504	3.93156e-95	0	ARMC9
RIPOR1	1.42384e-99	0.347976	0.5	0.3	4.18907e-95	0	RIPOR1
SPTBN2	1.49051e-99	0.435283	0.396	0.21	4.38524e-95	0	SPTBN2
GCLM	1.70342e-99	0.592158	0.451	0.245	5.01164e-95	0	GCLM
FAM171A1	1.76388e-99	0.237161	0.791	0.582	5.18952e-95	0	FAM171A1
WDR60	1.78004e-99	0.459499	0.913	0.751	5.23706e-95	0	WDR60
FN3K	1.80629e-99	0.682046	0.299	0.132	5.31428e-95	0	FN3K
ARMC2	1.86811e-99	0.134125	0.69	0.49	5.49615e-95	0	ARMC2
SETD3	2.03515e-99	0.327733	0.655	0.437	5.9876e-95	0	SETD3
MYSM1	2.46912e-99	0.386522	0.698	0.472	7.2644e-95	0	MYSM1
C6orf106	2.47183e-99	0.361663	0.605	0.388	7.27239e-95	0	C6orf106
SNPH	2.52215e-99	0.265258	0.429	0.248	7.42041e-95	0	SNPH
CYCS	2.53954e-99	0.761009	0.379	0.184	7.47158e-95	0	CYCS
LYSMD4	2.69382e-99	0.418369	0.334	0.166	7.92548e-95	0	LYSMD4
CCDC57	2.76521e-99	0.295284	0.76	0.541	8.13552e-95	0	CCDC57
PCSK7	2.89033e-99	0.266694	0.566	0.362	8.50364e-95	0	PCSK7
TMEM116	2.93981e-99	0.35281	0.377	0.205	8.64921e-95	0	TMEM116
CHST12	3.76984e-99	0.358541	0.391	0.211	1.10912e-94	0	CHST12
ADSS	4.53888e-99	0.329024	0.523	0.322	1.33538e-94	0	ADSS
BCO2	4.61434e-99	0.260876	0.435	0.255	1.35758e-94	0	BCO2
TIMM21	4.98722e-99	0.570396	0.289	0.131	1.46729e-94	0	TIMM21
AGL	5.2448e-99	0.292124	0.65	0.436	1.54307e-94	0	AGL
TTLL9	5.89366e-99	0.764928	0.269	0.112	1.73397e-94	0	TTLL9
DCTN2	5.96803e-99	0.364682	0.446	0.255	1.75585e-94	0	DCTN2
KHDRBS3	6.7089e-99	0.113139	0.861	0.664	1.97383e-94	0	KHDRBS3
SLX4IP	7.19719e-99	0.264651	0.569	0.368	2.11749e-94	0	SLX4IP
SRSF4	8.18448e-99	0.304667	0.722	0.504	2.40796e-94	0	SRSF4
GOLGA1	1.04761e-98	0.214209	0.502	0.314	3.08217e-94	0	GOLGA1
AP001528.2	1.37142e-98	0.720341	0.279	0.119	4.03486e-94	0	AP001528.2
CDC14B	1.48805e-98	0.159909	0.782	0.58	4.378e-94	0	CDC14B
ALG5	1.59957e-98	0.153491	0.418	0.252	4.7061e-94	0	ALG5
PLEC	1.81903e-98	0.155959	0.556	0.364	5.35176e-94	0	PLEC
TMEM181	1.83531e-98	0.21879	0.724	0.519	5.39966e-94	0	TMEM181
CD99L2	1.95087e-98	0.220685	0.651	0.45	5.73964e-94	0	CD99L2
HPRT1	2.1535e-98	0.193522	0.745	0.54	6.33581e-94	0	HPRT1
AFG1L	2.18214e-98	0.413441	0.706	0.478	6.42007e-94	0	AFG1L
TLE4	2.23809e-98	0.196198	0.337	0.183	6.58468e-94	0	TLE4
PRKRA	2.27509e-98	0.217344	0.549	0.357	6.69354e-94	0	PRKRA
SYNM	2.77947e-98	0.515701	0.312	0.146	8.17747e-94	0	SYNM
USO1	2.8718e-98	0.317553	0.647	0.43	8.44912e-94	0	USO1
CTTN	2.9305e-98	0.211545	0.647	0.443	8.62184e-94	0	CTTN
PIGN	2.96989e-98	0.179979	0.614	0.415	8.7377e-94	0	PIGN
MOB3B	3.09095e-98	0.269119	0.667	0.455	9.09388e-94	0	MOB3B
TM9SF2	3.127e-98	0.342009	0.582	0.37	9.19994e-94	0	TM9SF2
AP003086.2	3.16808e-98	0.849304	0.391	0.19	9.32081e-94	0	AP003086.2
TRANK1	3.35365e-98	0.248901	0.825	0.617	9.86679e-94	0	TRANK1
EFCAB6	3.35927e-98	0.16971	0.583	0.391	9.88331e-94	0	EFCAB6
TMEM38B	3.52941e-98	0.424272	0.477	0.276	1.03839e-93	0	TMEM38B
MAP1A	4.18729e-98	0.415307	0.701	0.473	1.23194e-93	0	MAP1A
SETD4	4.28436e-98	0.418769	0.377	0.198	1.2605e-93	0	SETD4
STMN2	4.36573e-98	0.485647	0.744	0.515	1.28444e-93	0	STMN2
SRPK1	4.53537e-98	0.360701	0.676	0.454	1.33435e-93	0	SRPK1
SPATS2	4.99295e-98	0.404053	0.723	0.497	1.46897e-93	0	SPATS2
CNNM1	5.06515e-98	0.409229	0.8	0.581	1.49022e-93	0	CNNM1
BCAP29	5.65544e-98	0.207008	0.682	0.48	1.66389e-93	0	BCAP29
RBM28	5.89142e-98	0.10971	0.538	0.356	1.73331e-93	0	RBM28
MAMLD1	5.92546e-98	0.448057	0.407	0.219	1.74333e-93	0	MAMLD1
APIP	6.35161e-98	0.298457	0.514	0.321	1.86871e-93	0	APIP
RAB4A	6.5285e-98	0.313002	0.452	0.266	1.92075e-93	0	RAB4A
CCDC130	6.74167e-98	0.410526	0.421	0.232	1.98347e-93	0	CCDC130
DNAJC18	6.77426e-98	0.16667	0.539	0.352	1.99306e-93	0	DNAJC18
PDE4A	7.84253e-98	0.200028	0.636	0.434	2.30735e-93	0	PDE4A
MLF1	8.0029e-98	0.582813	0.286	0.128	2.35453e-93	0	MLF1
PPP1R21	8.6043e-98	0.264124	0.606	0.398	2.53147e-93	0	PPP1R21
CEP57L1	9.24969e-98	0.360491	0.491	0.292	2.72135e-93	0	CEP57L1
GTF3C1	1.04552e-97	0.167406	0.626	0.431	3.07601e-93	0	GTF3C1
KLF3	1.12128e-97	0.62931	0.463	0.254	3.29892e-93	0	KLF3
TRAPPC10	1.15796e-97	0.200649	0.563	0.371	3.40684e-93	0	TRAPPC10
TRAPPC11	1.28195e-97	0.285167	0.622	0.415	3.77163e-93	0	TRAPPC11
DLG5	1.45845e-97	0.150183	0.555	0.368	4.29091e-93	0	DLG5
SLC25A40	1.4734e-97	0.344895	0.511	0.31	4.3349e-93	0	SLC25A40
GNG7	1.47871e-97	0.24864	0.772	0.56	4.3505e-93	0	GNG7
NOM1	1.65478e-97	0.456006	0.353	0.176	4.86852e-93	0	NOM1
DTWD2	1.71927e-97	0.411429	0.587	0.367	5.05827e-93	0	DTWD2
ETFRF1	1.72608e-97	0.228992	0.447	0.268	5.07831e-93	0	ETFRF1
WDR12	2.23463e-97	0.283135	0.462	0.275	6.5745e-93	0	WDR12
TMEM268	2.23907e-97	0.686237	0.378	0.189	6.58757e-93	0	TMEM268
NBEAL1	2.30098e-97	0.10655	0.738	0.545	6.76971e-93	0	NBEAL1
SUGCT	2.37885e-97	0.506426	0.489	0.281	6.99882e-93	0	SUGCT
DIXDC1	2.59817e-97	0.391301	0.836	0.626	7.64408e-93	0	DIXDC1
TMCO3	2.95423e-97	0.153874	0.616	0.424	8.69164e-93	0	TMCO3
MFF	3.11181e-97	0.314304	0.668	0.451	9.15526e-93	0	MFF
PTCH2	3.1352e-97	0.391098	0.501	0.3	9.22408e-93	0	PTCH2
CARS	3.31983e-97	0.254143	0.43	0.253	9.76727e-93	0	CARS
CYP2U1	3.61183e-97	0.331221	0.465	0.274	1.06264e-92	0	CYP2U1
ADAM11	3.6803e-97	0.430249	0.402	0.218	1.08278e-92	0	ADAM11
RAPGEFL1	3.84668e-97	0.501535	0.502	0.292	1.13173e-92	0	RAPGEFL1
KLHL22	4.13347e-97	0.238008	0.668	0.459	1.21611e-92	0	KLHL22
TXNDC11	4.58066e-97	0.203081	0.497	0.309	1.34768e-92	0	TXNDC11
FKBP3	4.59567e-97	0.315101	0.581	0.373	1.35209e-92	0	FKBP3
MLXIPL	4.76023e-97	0.340581	0.529	0.326	1.40051e-92	0	MLXIPL
WARS2	4.82481e-97	0.478253	0.371	0.192	1.41951e-92	0	WARS2
SLF1	4.93847e-97	0.221709	0.678	0.473	1.45295e-92	0	SLF1
GTF2H2	5.15585e-97	0.420237	0.356	0.189	1.5169e-92	0	GTF2H2
HADHB	5.19903e-97	0.430452	0.497	0.293	1.52961e-92	0	HADHB
PSMB7	6.22659e-97	0.170212	0.5	0.319	1.83193e-92	0	PSMB7
ATP5MD	6.59052e-97	0.50701	0.321	0.156	1.939e-92	0	ATP5MD
CLHC1	6.6239e-97	0.268865	0.549	0.352	1.94882e-92	0	CLHC1
LDHB	6.63676e-97	0.357274	0.452	0.262	1.9526e-92	0	LDHB
FLOT1	7.49762e-97	0.158363	0.523	0.338	2.20587e-92	0	FLOT1
ABHD12	7.83956e-97	0.118694	0.678	0.486	2.30648e-92	0	ABHD12
IPO11	8.42066e-97	0.308066	0.539	0.339	2.47744e-92	0	IPO11
TPCN1	8.52946e-97	0.340981	0.478	0.284	2.50945e-92	0	TPCN1
PPFIA4	8.69681e-97	0.144581	0.601	0.411	2.55869e-92	0	PPFIA4
LARP4	9.01783e-97	0.154039	0.663	0.466	2.65313e-92	0	LARP4
LEMD3	9.12337e-97	0.115069	0.65	0.458	2.68419e-92	0	LEMD3
XPO5	9.18436e-97	0.141757	0.508	0.328	2.70213e-92	0	XPO5
RAB11FIP3	9.3024e-97	0.255464	0.8	0.59	2.73686e-92	0	RAB11FIP3
LGALS8	1.0099e-96	0.240939	0.517	0.326	2.97123e-92	0	LGALS8
RABEPK	1.0182e-96	0.315249	0.434	0.248	2.99566e-92	0	RABEPK
FBXO15	1.02732e-96	0.884395	0.265	0.107	3.02248e-92	0	FBXO15
ERCC6	1.07358e-96	0.110383	0.552	0.368	3.15857e-92	0	ERCC6
CBWD5	1.08008e-96	0.509279	0.698	0.468	3.1777e-92	0	CBWD5
SLC35B4	1.12529e-96	0.294416	0.451	0.265	3.31071e-92	0	SLC35B4
SEC31B	1.15991e-96	0.478131	0.369	0.191	3.41256e-92	0	SEC31B
COLGALT2	1.28021e-96	0.140199	0.685	0.489	3.7665e-92	0	COLGALT2
MLXIP	1.3955e-96	0.18636	0.565	0.375	4.10569e-92	0	MLXIP
CCDC149	1.45073e-96	0.155171	0.639	0.443	4.26819e-92	0	CCDC149
C2CD2	1.46138e-96	0.432984	0.402	0.218	4.29952e-92	0	C2CD2
AC007785.1	1.49281e-96	0.355408	0.505	0.307	4.392e-92	0	AC007785.1
STX6	1.54443e-96	0.199889	0.457	0.283	4.54387e-92	0	STX6
MED15	1.70932e-96	0.260959	0.665	0.459	5.029e-92	0	MED15
UBE2G1	1.75001e-96	0.215772	0.654	0.452	5.14871e-92	0	UBE2G1
TSEN15	1.99344e-96	0.176177	0.548	0.36	5.86489e-92	0	TSEN15
PCBP4	2.17596e-96	0.400338	0.357	0.188	6.4019e-92	0	PCBP4
SUPV3L1	2.21253e-96	0.359687	0.506	0.307	6.5095e-92	0	SUPV3L1
DNMT3A	2.52442e-96	0.273271	0.787	0.578	7.42709e-92	0	DNMT3A
GSR	2.61437e-96	0.186472	0.563	0.369	7.69173e-92	0	GSR
KIF5A	3.35379e-96	0.233567	0.697	0.49	9.86718e-92	0	KIF5A
PEX14	3.5656e-96	0.202335	0.633	0.432	1.04904e-91	0	PEX14
TRIM16	3.62728e-96	0.527375	0.346	0.174	1.06718e-91	0	TRIM16
IMMT	3.85863e-96	0.33171	0.558	0.354	1.13525e-91	0	IMMT
AKAP7	4.82581e-96	0.299866	0.697	0.482	1.4198e-91	0	AKAP7
MFSD11	4.86953e-96	0.139543	0.66	0.465	1.43266e-91	0	MFSD11
PRMT7	4.8983e-96	0.287228	0.524	0.327	1.44113e-91	0	PRMT7
B4GALT5	5.10956e-96	0.144762	0.694	0.497	1.50328e-91	0	B4GALT5
COG2	5.8063e-96	0.433954	0.374	0.197	1.70827e-91	0	COG2
GPBP1L1	6.43177e-96	0.206672	0.648	0.449	1.89229e-91	0	GPBP1L1
SCAF11	6.43206e-96	0.172113	0.744	0.542	1.89238e-91	0	SCAF11
NDUFV3	7.15622e-96	0.252874	0.564	0.366	2.10543e-91	0	NDUFV3
REEP2	7.64627e-96	0.357448	0.481	0.286	2.24961e-91	0	REEP2
IST1	7.71974e-96	0.173494	0.569	0.377	2.27122e-91	0	IST1
IMMP1L	8.35181e-96	0.340692	0.576	0.369	2.45719e-91	0	IMMP1L
HDAC3	9.04414e-96	0.276632	0.493	0.304	2.66088e-91	0	HDAC3
TPK1	9.10017e-96	0.384613	0.697	0.475	2.67736e-91	0	TPK1
BCL2L13	9.49674e-96	0.177647	0.597	0.405	2.79404e-91	0	BCL2L13
PRMT9	1.02618e-95	0.270461	0.505	0.316	3.01912e-91	0	PRMT9
CDADC1	1.16444e-95	0.505381	0.377	0.197	3.42591e-91	0	CDADC1
HMG20A	1.42748e-95	0.133112	0.637	0.445	4.19978e-91	0	HMG20A
PFKM	1.47225e-95	0.422478	0.377	0.202	4.33152e-91	0	PFKM
ORC2	1.48384e-95	0.347753	0.727	0.509	4.36561e-91	0	ORC2
ATP1B3	1.49144e-95	0.249171	0.65	0.444	4.38797e-91	0	ATP1B3
CDC42SE1	1.53955e-95	0.436218	0.426	0.237	4.5295e-91	0	CDC42SE1
AMN1	1.59379e-95	0.272878	0.717	0.508	4.68909e-91	0	AMN1
ABCG1	2.02566e-95	0.375256	0.341	0.175	5.9597e-91	0	ABCG1
PDCD6	2.02747e-95	0.265302	0.499	0.306	5.96501e-91	0	PDCD6
ZFYVE27	2.09331e-95	0.4275	0.457	0.262	6.15873e-91	0	ZFYVE27
PDXK	2.68534e-95	0.288551	0.72	0.51	7.90054e-91	0	PDXK
SUCLG1	2.80076e-95	0.31777	0.573	0.369	8.24013e-91	0	SUCLG1
OGDHL	2.82566e-95	0.434379	0.342	0.177	8.31338e-91	0	OGDHL
IQCH-AS1	2.93806e-95	0.886019	0.278	0.115	8.64405e-91	0	IQCH-AS1
ABCD3	3.25027e-95	0.32602	0.578	0.372	9.56262e-91	0	ABCD3
IQCH	3.26388e-95	0.784421	0.312	0.139	9.60266e-91	0	IQCH
STEAP2	3.27185e-95	0.286611	0.57	0.37	9.62612e-91	0	STEAP2
MAPKBP1	3.33256e-95	0.324278	0.706	0.489	9.80473e-91	0	MAPKBP1
CCDC186	3.45016e-95	0.122963	0.643	0.452	1.01507e-90	0	CCDC186
KIAA1549	3.48508e-95	0.144846	0.668	0.475	1.02535e-90	0	KIAA1549
C11orf58	3.53784e-95	0.482551	0.77	0.549	1.04087e-90	0	C11orf58
PRIMPOL	3.54991e-95	0.181075	0.517	0.333	1.04442e-90	0	PRIMPOL
MUM1	3.56691e-95	0.114358	0.646	0.453	1.04942e-90	0	MUM1
MTMR6	3.62697e-95	0.177893	0.563	0.373	1.06709e-90	0	MTMR6
KDM2B	3.79926e-95	0.171789	0.672	0.474	1.11778e-90	0	KDM2B
DCUN1D2	4.01366e-95	0.130815	0.562	0.378	1.18086e-90	0	DCUN1D2
LETMD1	4.80126e-95	0.536496	0.435	0.239	1.41258e-90	0	LETMD1
ALDH8A1	5.41554e-95	0.634431	0.332	0.159	1.59331e-90	0	ALDH8A1
YES1	5.56503e-95	0.579832	0.285	0.13	1.63729e-90	0	YES1
SMAP2	5.93469e-95	0.340714	0.663	0.447	1.74605e-90	0	SMAP2
MIA2	6.34461e-95	0.11182	0.601	0.419	1.86665e-90	0	MIA2
PKM	7.15103e-95	0.36844	0.668	0.449	2.10391e-90	0	PKM
HIC2	7.69916e-95	0.11158	0.593	0.412	2.26517e-90	0	HIC2
MRPS31	9.13949e-95	0.175955	0.583	0.391	2.68893e-90	0	MRPS31
AC108047.1	9.45013e-95	0.216326	0.413	0.243	2.78032e-90	0	AC108047.1
HOMER1	9.4917e-95	0.357419	0.777	0.561	2.79255e-90	0	HOMER1
NOXA1	1.07605e-94	0.48201	0.338	0.17	3.16586e-90	0	NOXA1
VDAC1	1.2178e-94	0.505268	0.431	0.24	3.58288e-90	0	VDAC1
SPIN1	1.2499e-94	0.419217	0.907	0.761	3.67734e-90	0	SPIN1
SEC22A	1.35043e-94	0.127686	0.597	0.414	3.9731e-90	0	SEC22A
LAPTM4B	1.42938e-94	0.277775	0.443	0.265	4.20538e-90	0	LAPTM4B
PPTC7	1.59448e-94	0.575281	0.381	0.198	4.69111e-90	0	PPTC7
ATP5F1B	1.7492e-94	0.371265	0.42	0.236	5.14631e-90	0	ATP5F1B
TBRG1	1.78976e-94	0.335261	0.469	0.279	5.26565e-90	0	TBRG1
ENDOD1	2.004e-94	0.301327	0.397	0.225	5.89597e-90	0	ENDOD1
THOC5	2.61013e-94	0.457745	0.415	0.23	7.67927e-90	0	THOC5
CCDC25	2.69947e-94	0.306156	0.4	0.227	7.9421e-90	0	CCDC25
ICA1	2.92257e-94	0.366047	0.862	0.663	8.5985e-90	0	ICA1
MIGA2	3.42756e-94	0.529304	0.341	0.171	1.00842e-89	0	MIGA2
ZNF746	4.39513e-94	0.308796	0.316	0.165	1.29309e-89	0	ZNF746
NR2C1	4.92184e-94	0.351177	0.722	0.503	1.44806e-89	0	NR2C1
C9orf72	5.02343e-94	0.282838	0.598	0.396	1.47794e-89	0	C9orf72
STX18-AS1	5.09968e-94	0.403374	0.775	0.557	1.50038e-89	0	STX18-AS1
NUDT5	5.58809e-94	0.22255	0.509	0.329	1.64407e-89	0	NUDT5
TM2D3	8.64891e-94	0.205701	0.555	0.366	2.5446e-89	0	TM2D3
AP2M1	9.03977e-94	0.359385	0.445	0.263	2.65959e-89	0	AP2M1
TMEM63B	9.41681e-94	0.124949	0.513	0.333	2.77052e-89	0	TMEM63B
HM13	1.00895e-93	0.161533	0.643	0.452	2.96842e-89	0	HM13
GDAP2	1.02505e-93	0.246556	0.519	0.33	3.01581e-89	0	GDAP2
PLEKHA7	1.09194e-93	0.255293	0.422	0.248	3.2126e-89	0	PLEKHA7
LARS2	1.21423e-93	0.336166	0.581	0.374	3.5724e-89	0	LARS2
UCHL5	1.29031e-93	0.182101	0.473	0.299	3.79622e-89	0	UCHL5
NIPSNAP2	1.44087e-93	0.219173	0.662	0.46	4.23918e-89	0	NIPSNAP2
ZNF516	1.46114e-93	0.206044	0.624	0.427	4.29882e-89	0	ZNF516
INTS10	1.93766e-93	0.263214	0.654	0.449	5.7008e-89	0	INTS10
TOGARAM2	1.99532e-93	0.341522	0.417	0.239	5.87043e-89	0	TOGARAM2
MVB12B	2.06855e-93	0.184545	0.727	0.527	6.08587e-89	0	MVB12B
AC105285.1	2.29129e-93	0.236691	0.363	0.203	6.74121e-89	0	AC105285.1
CD2AP	2.31381e-93	0.219314	0.589	0.391	6.80746e-89	0	CD2AP
CABIN1	2.37321e-93	0.290782	0.638	0.428	6.98223e-89	0	CABIN1
NFU1	2.42472e-93	0.266457	0.425	0.251	7.13378e-89	0	NFU1
PCDH7	2.561e-93	0.452009	0.847	0.661	7.53472e-89	0	PCDH7
MRPS22	2.56689e-93	0.604984	0.325	0.156	7.55205e-89	0	MRPS22
AC027644.4	3.21604e-93	0.23307	0.595	0.399	9.46192e-89	0	AC027644.4
POLR3A	3.43857e-93	0.16392	0.503	0.325	1.01166e-88	0	POLR3A
ATL1	3.4984e-93	0.220713	0.74	0.536	1.02927e-88	0	ATL1
NDUFA4	3.89244e-93	0.30223	0.447	0.269	1.1452e-88	0	NDUFA4
HIVEP2	3.98863e-93	0.406792	0.928	0.808	1.17349e-88	0	HIVEP2
TUBG2	4.0389e-93	0.27704	0.376	0.21	1.18828e-88	0	TUBG2
NCDN	4.47512e-93	0.288824	0.47	0.284	1.31662e-88	0	NCDN
AZIN2	4.76382e-93	0.130712	0.378	0.224	1.40156e-88	0	AZIN2
STT3B	5.1195e-93	0.25855	0.643	0.44	1.50621e-88	0	STT3B
FAM219A	5.27769e-93	0.25116	0.7	0.495	1.55275e-88	0	FAM219A
AC074032.1	5.34997e-93	0.297833	0.564	0.365	1.57402e-88	0	AC074032.1
CCDC34	5.70926e-93	0.843547	0.296	0.127	1.67972e-88	0	CCDC34
GLIPR1	6.09733e-93	0.689208	0.32	0.149	1.7939e-88	0	GLIPR1
NAT10	6.23747e-93	0.119421	0.445	0.278	1.83513e-88	0	NAT10
FAM153C	6.49682e-93	0.239433	0.611	0.413	1.91143e-88	0	FAM153C
CLASRP	7.18625e-93	0.151944	0.471	0.299	2.11427e-88	0	CLASRP
NDUFA8	7.62034e-93	0.600307	0.318	0.151	2.24198e-88	0	NDUFA8
PAK5	7.64556e-93	0.329637	0.921	0.756	2.2494e-88	0	PAK5
KANSL3	7.99117e-93	0.27397	0.576	0.376	2.35108e-88	0	KANSL3
NDRG4	8.18602e-93	0.379307	0.678	0.463	2.40841e-88	0	NDRG4
AC139720.1	8.56448e-93	0.264168	0.333	0.177	2.51976e-88	0	AC139720.1
AGAP4	8.96959e-93	0.147063	0.481	0.307	2.63894e-88	0	AGAP4
ATPAF1	9.27452e-93	0.430546	0.681	0.46	2.72866e-88	0	ATPAF1
WDR11-AS1	9.32487e-93	0.154935	0.711	0.518	2.74347e-88	0	WDR11-AS1
LSM5	9.52848e-93	0.553707	0.297	0.14	2.80337e-88	0	LSM5
TM9SF4	1.15477e-92	0.158317	0.566	0.381	3.39746e-88	0	TM9SF4
NSUN3	1.29445e-92	0.435403	0.435	0.249	3.80841e-88	0	NSUN3
PHC1	1.30813e-92	0.108728	0.487	0.317	3.84866e-88	0	PHC1
B3GALNT2	1.35393e-92	0.158194	0.582	0.396	3.98339e-88	0	B3GALNT2
COL26A1	1.40043e-92	0.243926	0.429	0.254	4.12021e-88	0	COL26A1
ITGB1	1.42069e-92	0.159044	0.56	0.374	4.17981e-88	0	ITGB1
RIPK1	1.6498e-92	0.297263	0.514	0.322	4.85388e-88	0	RIPK1
LIN52	1.66263e-92	0.135319	0.663	0.478	4.89163e-88	0	LIN52
NIM1K	1.67659e-92	0.141989	0.632	0.446	4.93271e-88	0	NIM1K
AL158152.2	1.72509e-92	0.232717	0.407	0.238	5.0754e-88	0	AL158152.2
ZNF76	1.91333e-92	0.180531	0.389	0.227	5.62922e-88	0	ZNF76
MRNIP	1.99839e-92	0.177525	0.506	0.328	5.87947e-88	0	MRNIP
ICE2	2.15921e-92	0.191273	0.601	0.408	6.3526e-88	0	ICE2
HSPA12A	2.19228e-92	0.390378	0.937	0.814	6.44991e-88	0	HSPA12A
XPR1	2.23527e-92	0.430328	0.789	0.574	6.57639e-88	0	XPR1
DCX	3.18481e-92	0.371919	0.819	0.61	9.37002e-88	0	DCX
RPGRIP1L	3.29773e-92	0.176714	0.513	0.333	9.70225e-88	0	RPGRIP1L
CEND1	3.33364e-92	0.398458	0.426	0.243	9.80792e-88	0	CEND1
MEG3	3.51099e-92	0.191563	0.696	0.498	1.03297e-87	0	MEG3
CMTM6	3.59397e-92	0.677597	0.287	0.13	1.05738e-87	0	CMTM6
GUCY1A2	3.67206e-92	0.104976	0.857	0.671	1.08036e-87	0	GUCY1A2
CCDC174	4.33437e-92	0.290748	0.356	0.192	1.27521e-87	0	CCDC174
NT5M	4.38979e-92	0.356513	0.351	0.187	1.29152e-87	0	NT5M
INPP5B	4.61189e-92	0.215578	0.639	0.44	1.35686e-87	0	INPP5B
RPE	4.6316e-92	0.183612	0.575	0.388	1.36266e-87	0	RPE
KIF9-AS1	5.10448e-92	0.419506	0.877	0.689	1.50179e-87	0	KIF9-AS1
ANKRD17	5.58148e-92	0.370798	0.948	0.866	1.64213e-87	0	ANKRD17
SRGAP2B	5.90132e-92	0.287169	0.656	0.449	1.73623e-87	0	SRGAP2B
AC007566.1	5.98421e-92	0.164464	0.542	0.366	1.76061e-87	0	AC007566.1
MIR2052HG	5.99972e-92	0.828575	0.491	0.273	1.76518e-87	0	MIR2052HG
COPG2	6.00586e-92	0.160339	0.621	0.431	1.76698e-87	0	COPG2
CTDSPL	6.03005e-92	0.401056	0.86	0.668	1.7741e-87	0	CTDSPL
NARS	6.11123e-92	0.297185	0.466	0.279	1.79799e-87	0	NARS
ZBTB40	6.67229e-92	0.373131	0.373	0.203	1.96305e-87	0	ZBTB40
TTC21A	7.61723e-92	0.269037	0.338	0.184	2.24106e-87	0	TTC21A
AC092835.1	7.8982e-92	0.208765	0.472	0.293	2.32373e-87	0	AC092835.1
TBC1D9	7.96358e-92	0.195949	0.692	0.495	2.34296e-87	0	TBC1D9
OGFR	8.31659e-92	0.163105	0.373	0.218	2.44682e-87	0	OGFR
BTBD1	8.89852e-92	0.228251	0.53	0.344	2.61803e-87	0	BTBD1
ECSIT	8.92783e-92	0.200534	0.397	0.23	2.62666e-87	0	ECSIT
DDHD2	9.74096e-92	0.279094	0.618	0.414	2.86589e-87	0	DDHD2
CCNC	1.01508e-91	0.211284	0.581	0.394	2.98647e-87	0	CCNC
DUBR	1.03063e-91	0.32013	0.756	0.544	3.03221e-87	0	DUBR
EIF2B3	1.04884e-91	0.189687	0.65	0.455	3.0858e-87	0	EIF2B3
ADCYAP1R1	1.05473e-91	0.284163	0.739	0.529	3.10313e-87	0	ADCYAP1R1
CRELD1	1.07788e-91	0.127798	0.462	0.294	3.17123e-87	0	CRELD1
STIM2	1.08106e-91	0.15546	0.661	0.47	3.1806e-87	0	STIM2
ELP6	1.13134e-91	0.258361	0.307	0.161	3.32851e-87	0	ELP6
RANBP10	1.14299e-91	0.1788	0.523	0.34	3.3628e-87	0	RANBP10
SAP30	1.20776e-91	0.711707	0.29	0.132	3.55334e-87	0	SAP30
SYP	1.4626e-91	0.375706	0.784	0.571	4.30312e-87	0	SYP
CEP68	1.6627e-91	0.122126	0.548	0.373	4.89184e-87	0	CEP68
ISCU	1.81044e-91	0.586595	0.395	0.21	5.32651e-87	0	ISCU
GOLGA7B	2.05327e-91	0.394981	0.322	0.164	6.04092e-87	0	GOLGA7B
INA	2.12171e-91	0.350661	0.538	0.338	6.24227e-87	0	INA
HSPA9	2.18437e-91	0.10179	0.561	0.386	6.42663e-87	0	HSPA9
ZNF106	2.20266e-91	0.201417	0.674	0.474	6.48045e-87	0	ZNF106
KIF27	2.22731e-91	0.110696	0.542	0.364	6.55297e-87	0	KIF27
TMEM170B	2.23525e-91	0.23457	0.54	0.354	6.57633e-87	0	TMEM170B
IL7	2.37357e-91	1.12927	0.265	0.103	6.98329e-87	0	IL7
C11orf49	2.51697e-91	0.401455	0.844	0.644	7.40517e-87	0	C11orf49
R3HCC1L	2.54463e-91	0.318148	0.505	0.313	7.48656e-87	0	R3HCC1L
C1orf131	2.60799e-91	0.392453	0.306	0.151	7.67295e-87	0	C1orf131
PDSS2	2.67225e-91	0.147978	0.707	0.517	7.86203e-87	0	PDSS2
TNIK	2.87767e-91	0.215986	0.958	0.822	8.46638e-87	0	TNIK
DHX35	3.07169e-91	0.250726	0.381	0.22	9.03722e-87	0	DHX35
LINC00662	3.07647e-91	0.209157	0.746	0.544	9.05128e-87	0	LINC00662
NDRG3	3.28948e-91	0.228358	0.698	0.496	9.67798e-87	0	NDRG3
SLC3A2	3.39823e-91	0.271286	0.367	0.204	9.99794e-87	0	SLC3A2
MAP9	3.40842e-91	0.324429	0.603	0.394	1.00279e-86	0	MAP9
SGPP1	3.57915e-91	0.157371	0.545	0.364	1.05302e-86	0	SGPP1
QRICH2	3.97067e-91	0.383826	0.423	0.24	1.16821e-86	0	QRICH2
ZBTB43	4.04304e-91	0.21322	0.535	0.344	1.1895e-86	0	ZBTB43
SLC8A3	4.21216e-91	0.287538	0.84	0.64	1.23926e-86	0	SLC8A3
FBXO22	4.91096e-91	0.118765	0.686	0.497	1.44485e-86	0	FBXO22
STX12	5.23856e-91	0.133968	0.679	0.493	1.54124e-86	0	STX12
TAPT1-AS1	6.96667e-91	0.345121	0.792	0.582	2.04966e-86	0	TAPT1-AS1
AL136382.1	7.82245e-91	0.718471	0.258	0.109	2.30144e-86	0	AL136382.1
DOCK4	8.91777e-91	0.370368	0.896	0.717	2.6237e-86	0	DOCK4
ADAL	8.95774e-91	0.58573	0.357	0.18	2.63546e-86	0	ADAL
NEIL1	9.73451e-91	0.524777	0.326	0.162	2.86399e-86	0	NEIL1
SELENOF	1.06563e-90	0.123581	0.542	0.366	3.13518e-86	0	SELENOF
ZC3H7B	1.09277e-90	0.157108	0.485	0.313	3.21502e-86	0	ZC3H7B
CBY1	1.21924e-90	0.323473	0.352	0.187	3.58713e-86	0	CBY1
HMGN3	1.28718e-90	0.394648	0.696	0.479	3.78701e-86	0	HMGN3
AMZ1	1.31479e-90	0.432727	0.385	0.208	3.86823e-86	0	AMZ1
PEX1	1.34224e-90	0.152437	0.578	0.393	3.949e-86	0	PEX1
PIGZ	1.38818e-90	0.365853	0.395	0.223	4.08417e-86	0	PIGZ
TASP1	1.59494e-90	0.291667	0.786	0.579	4.69249e-86	0	TASP1
MTX2	1.70926e-90	0.39169	0.795	0.583	5.02881e-86	0	MTX2
ACADM	1.78381e-90	0.257374	0.597	0.398	5.24814e-86	0	ACADM
MRPS21	1.9316e-90	0.303393	0.41	0.237	5.68296e-86	0	MRPS21
DENND6A	2.05477e-90	0.267324	0.693	0.488	6.04533e-86	0	DENND6A
IFT20	2.13709e-90	0.195915	0.468	0.291	6.28752e-86	0	IFT20
TMEM65	2.21968e-90	0.12123	0.757	0.571	6.53053e-86	0	TMEM65
TMCC2	2.36165e-90	0.572108	0.256	0.113	6.9482e-86	0	TMCC2
HADH	2.39206e-90	0.247429	0.426	0.254	7.03768e-86	0	HADH
AC006059.1	2.67431e-90	0.528401	0.495	0.293	7.86808e-86	0	AC006059.1
TUBE1	2.81897e-90	0.178491	0.606	0.419	8.29369e-86	0	TUBE1
CMPK1	2.96818e-90	0.373469	0.458	0.271	8.73269e-86	0	CMPK1
COPS7B	3.6902e-90	0.305569	0.341	0.185	1.0857e-85	0	COPS7B
PEX3	3.80729e-90	0.13826	0.709	0.519	1.12014e-85	0	PEX3
CCDC148	4.54423e-90	0.328325	0.646	0.437	1.33696e-85	0	CCDC148
PGM1	4.69064e-90	0.320623	0.413	0.238	1.38003e-85	0	PGM1
CFAP69	4.88536e-90	0.215065	0.548	0.358	1.43732e-85	0	CFAP69
TRAK2	5.155e-90	0.227435	0.717	0.515	1.51665e-85	0	TRAK2
POLN	5.24735e-90	0.153929	0.524	0.349	1.54382e-85	0	POLN
PPIP5K1	5.41721e-90	0.284544	0.712	0.505	1.5938e-85	0	PPIP5K1
SNX9	5.4979e-90	0.376314	0.829	0.626	1.61754e-85	0	SNX9
YPEL5	5.731e-90	0.104584	0.394	0.246	1.68612e-85	0	YPEL5
ZNF692	5.85375e-90	0.352316	0.346	0.183	1.72223e-85	0	ZNF692
SIRT2	7.22742e-90	0.160412	0.473	0.302	2.12638e-85	0	SIRT2
TAZ	7.31417e-90	0.394036	0.421	0.241	2.1519e-85	0	TAZ
PDCD7	7.33971e-90	0.15673	0.609	0.42	2.15942e-85	0	PDCD7
DNM1	8.20296e-90	0.414995	0.91	0.772	2.41339e-85	0	DNM1
METTL24	9.00362e-90	0.211475	0.483	0.306	2.64896e-85	0	METTL24
AIFM1	1.03608e-89	0.76918	0.284	0.126	3.04826e-85	0	AIFM1
ZMAT3	1.34618e-89	0.11364	0.457	0.296	3.9606e-85	0	ZMAT3
LRRC41	1.46522e-89	0.166328	0.495	0.324	4.31081e-85	0	LRRC41
DEK	1.51486e-89	0.416357	0.389	0.214	4.45687e-85	0	DEK
SHTN1	1.58167e-89	0.377693	0.93	0.798	4.65342e-85	0	SHTN1
NDUFV2	1.89141e-89	0.242675	0.521	0.336	5.56473e-85	0	NDUFV2
GPLD1	2.04885e-89	0.314417	0.628	0.422	6.02792e-85	0	GPLD1
PNPT1	2.0993e-89	0.141678	0.551	0.377	6.17634e-85	0	PNPT1
ZNF81	2.14553e-89	0.234074	0.421	0.253	6.31238e-85	0	ZNF81
AC090709.1	2.26695e-89	0.721602	0.419	0.224	6.66959e-85	0	AC090709.1
TAMM41	2.35863e-89	0.262695	0.61	0.414	6.93932e-85	0	TAMM41
AGFG1	2.49504e-89	0.250392	0.764	0.563	7.34064e-85	0	AGFG1
SUPT20H	2.55936e-89	0.17548	0.605	0.418	7.5299e-85	0	SUPT20H
CLVS2	2.65604e-89	0.374924	0.864	0.675	7.81433e-85	0	CLVS2
PIP4P2	2.94482e-89	0.198219	0.535	0.355	8.66397e-85	0	PIP4P2
EIPR1	2.96442e-89	0.108653	0.646	0.464	8.72162e-85	0	EIPR1
LTN1	3.20205e-89	0.105226	0.592	0.411	9.42074e-85	0	LTN1
PARP16	3.26927e-89	0.122342	0.431	0.267	9.61851e-85	0	PARP16
GCA	3.61763e-89	0.562047	0.306	0.147	1.06434e-84	0	GCA
IMPG2	3.88941e-89	0.702153	0.305	0.141	1.1443e-84	0	IMPG2
ITGB3BP	4.00641e-89	0.214977	0.5	0.322	1.17873e-84	0	ITGB3BP
EFTUD2	4.48005e-89	0.22941	0.375	0.217	1.31808e-84	0	EFTUD2
CCDC93	4.96989e-89	0.242751	0.668	0.463	1.46219e-84	0	CCDC93
SLC27A1	5.24495e-89	0.164789	0.476	0.303	1.54312e-84	0	SLC27A1
STK38L	5.28476e-89	0.235169	0.49	0.311	1.55483e-84	0	STK38L
WDR61	5.66967e-89	0.302693	0.496	0.312	1.66807e-84	0	WDR61
PARVB	5.9592e-89	0.325927	0.334	0.179	1.75326e-84	0	PARVB
MAPK9	6.26152e-89	0.23485	0.728	0.527	1.8422e-84	0	MAPK9
FAM156A	7.01502e-89	0.20182	0.43	0.266	2.06389e-84	0	FAM156A
MAPK10	7.732e-89	0.257164	0.987	0.963	2.27483e-84	0	MAPK10
SMG5	7.77267e-89	0.258161	0.379	0.218	2.2868e-84	0	SMG5
ARHGAP39	8.35814e-89	0.246285	0.471	0.293	2.45905e-84	0	ARHGAP39
ABHD5	8.60656e-89	0.109235	0.43	0.272	2.53214e-84	0	ABHD5
ADCY9	9.63083e-89	0.24625	0.777	0.577	2.83349e-84	0	ADCY9
C11orf74	1.01192e-88	0.137122	0.347	0.202	2.97718e-84	0	C11orf74
SIL1	1.03781e-88	0.399852	0.81	0.604	3.05334e-84	0	SIL1
THRAP3	1.05766e-88	0.172481	0.717	0.525	3.11173e-84	0	THRAP3
FASTKD2	1.08274e-88	0.3635	0.461	0.274	3.18552e-84	0	FASTKD2
WASL	1.23491e-88	0.247379	0.665	0.466	3.63322e-84	0	WASL
EPHX2	1.29541e-88	0.574694	0.263	0.119	3.81122e-84	0	EPHX2
SLC25A3	1.71242e-88	0.329817	0.473	0.29	5.0381e-84	0	SLC25A3
NUDT4	1.79834e-88	0.519888	0.35	0.182	5.29091e-84	0	NUDT4
RYR2	1.88092e-88	0.354133	0.962	0.877	5.53384e-84	0	RYR2
COQ4	1.9187e-88	0.197123	0.438	0.272	5.64501e-84	0	COQ4
NF2	1.92888e-88	0.157999	0.556	0.377	5.67496e-84	0	NF2
SLC25A37	1.99383e-88	0.261362	0.432	0.26	5.86605e-84	0	SLC25A37
UGDH-AS1	2.60087e-88	0.238377	0.408	0.245	7.65201e-84	0	UGDH-AS1
MAPKAPK2	3.13219e-88	0.539875	0.266	0.123	9.21521e-84	0	MAPKAPK2
PLEKHH1	3.23455e-88	0.145777	0.463	0.293	9.51638e-84	0	PLEKHH1
ARHGEF37	3.30788e-88	0.580869	0.288	0.134	9.73211e-84	0	ARHGEF37
CYSTM1	3.35393e-88	0.57976	0.343	0.174	9.8676e-84	0	CYSTM1
DACT3	3.41849e-88	0.467586	0.328	0.166	1.00575e-83	0	DACT3
GNS	3.52872e-88	0.199635	0.495	0.319	1.03819e-83	0	GNS
KIAA0513	4.13083e-88	0.316977	0.65	0.441	1.21533e-83	0	KIAA0513
NEK7	4.27169e-88	0.404311	0.473	0.281	1.25677e-83	0	NEK7
MYO6	4.72138e-88	0.415425	0.862	0.68	1.38908e-83	0	MYO6
ACYP1	4.77472e-88	0.366693	0.396	0.226	1.40477e-83	0	ACYP1
SNRNP40	5.45649e-88	0.165993	0.417	0.257	1.60535e-83	0	SNRNP40
CARNMT1	5.48522e-88	0.149776	0.449	0.283	1.61381e-83	0	CARNMT1
ZRANB1	6.04974e-88	0.204912	0.549	0.364	1.77989e-83	0	ZRANB1
FRA10AC1	6.30403e-88	0.166677	0.605	0.419	1.85471e-83	0	FRA10AC1
GBF1	6.44088e-88	0.134076	0.759	0.576	1.89497e-83	0	GBF1
GART	6.79559e-88	0.229802	0.397	0.236	1.99933e-83	0	GART
GMPR	7.90694e-88	0.54702	0.254	0.115	2.3263e-83	0	GMPR
AC009061.2	8.63828e-88	0.257649	0.474	0.294	2.54147e-83	0	AC009061.2
EEA1	9.45417e-88	0.172845	0.735	0.542	2.78151e-83	0	EEA1
METTL15	9.81564e-88	0.298098	0.786	0.583	2.88786e-83	0	METTL15
PFDN1	1.00822e-87	0.246317	0.365	0.21	2.9663e-83	0	PFDN1
WWC2	1.08152e-87	0.387945	0.826	0.625	3.18194e-83	0	WWC2
DPH6-DT	1.15342e-87	0.321666	0.628	0.422	3.39348e-83	0	DPH6-DT
GLS2	1.27293e-87	0.264822	0.458	0.284	3.74507e-83	0	GLS2
PCBD2	1.32044e-87	0.467009	0.35	0.185	3.88487e-83	0	PCBD2
SMC6	1.33024e-87	0.180538	0.611	0.423	3.91369e-83	0	SMC6
MAPKAP1	1.33691e-87	0.244907	0.78	0.583	3.93332e-83	0	MAPKAP1
EXOC4	1.38711e-87	0.367298	0.948	0.868	4.08103e-83	0	EXOC4
AC010615.4	1.51681e-87	0.428342	0.665	0.45	4.46262e-83	0	AC010615.4
CAB39	1.54673e-87	0.160245	0.693	0.502	4.55063e-83	0	CAB39
VPS45	1.69708e-87	0.153714	0.806	0.619	4.99299e-83	0	VPS45
YPEL2	1.70622e-87	0.142566	0.612	0.434	5.01987e-83	0	YPEL2
ATAD1	1.78178e-87	0.264977	0.668	0.467	5.24217e-83	0	ATAD1
PSMD12	1.85399e-87	0.183812	0.492	0.318	5.45463e-83	0	PSMD12
ACYP2	1.871e-87	0.453764	0.889	0.737	5.50466e-83	0	ACYP2
AP003108.2	2.08032e-87	0.247011	0.502	0.319	6.12052e-83	0	AP003108.2
C6orf136	2.27988e-87	0.454084	0.291	0.142	6.70764e-83	0	C6orf136
PRR14L	2.39848e-87	0.106219	0.677	0.493	7.05658e-83	0	PRR14L
GABARAPL1	2.46367e-87	0.49492	0.463	0.267	7.24836e-83	0	GABARAPL1
LINC01632	2.67565e-87	0.604154	0.306	0.143	7.87204e-83	0	LINC01632
SGPL1	2.69538e-87	0.233969	0.511	0.332	7.93007e-83	0	SGPL1
SNW1	2.86777e-87	0.114208	0.377	0.23	8.43728e-83	0	SNW1
SS18L1	3.03078e-87	0.113542	0.524	0.355	8.91687e-83	0	SS18L1
AC090907.2	3.03188e-87	0.797597	0.281	0.123	8.9201e-83	0	AC090907.2
LRRC20	3.25102e-87	0.412409	0.28	0.136	9.56484e-83	0	LRRC20
SEC23A	3.37719e-87	0.20834	0.623	0.435	9.93604e-83	0	SEC23A
LINC01771	3.58923e-87	0.635011	0.261	0.114	1.05599e-82	0	LINC01771
STX1B	3.67831e-87	0.271166	0.477	0.299	1.0822e-82	0	STX1B
PIGK	3.74192e-87	0.189106	0.456	0.286	1.10091e-82	0	PIGK
SLC9A1	3.93093e-87	0.464137	0.364	0.194	1.15652e-82	0	SLC9A1
IVD	3.99833e-87	0.113281	0.435	0.278	1.17635e-82	0	IVD
GFM1	4.36163e-87	0.104844	0.458	0.296	1.28323e-82	0	GFM1
ARNTL	4.36334e-87	0.235746	0.539	0.358	1.28374e-82	0	ARNTL
AL356599.1	4.64953e-87	0.107086	0.504	0.337	1.36794e-82	0	AL356599.1
NFE2L2	4.97022e-87	0.251329	0.758	0.557	1.46229e-82	0	NFE2L2
PCYT1A	5.67109e-87	0.361079	0.372	0.208	1.66849e-82	0	PCYT1A
ZKSCAN1	6.33644e-87	0.286401	0.74	0.538	1.86424e-82	0	ZKSCAN1
LNPK	6.50667e-87	0.338303	0.61	0.411	1.91433e-82	0	LNPK
Z99774.1	7.0063e-87	1.14862	0.281	0.116	2.06132e-82	0	Z99774.1
DBT	7.23767e-87	0.201228	0.448	0.283	2.1294e-82	0	DBT
STRBP	7.99059e-87	0.401308	0.908	0.772	2.35091e-82	0	STRBP
UBL3	8.27465e-87	0.27212	0.791	0.591	2.43449e-82	0	UBL3
AHCYL1	9.10081e-87	0.17617	0.558	0.374	2.67755e-82	0	AHCYL1
WDR44	9.43434e-87	0.144865	0.596	0.414	2.77568e-82	0	WDR44
ERCC8	1.04708e-86	0.25492	0.545	0.357	3.0806e-82	0	ERCC8
AC024901.1	1.1207e-86	0.587705	0.678	0.459	3.29721e-82	0	AC024901.1
HAT1	1.1315e-86	0.130801	0.488	0.32	3.32899e-82	0	HAT1
OTUD6B-AS1	1.22569e-86	0.16966	0.402	0.242	3.60611e-82	0	OTUD6B-AS1
NHLRC3	1.2317e-86	0.275121	0.537	0.349	3.62377e-82	0	NHLRC3
LASP1	1.43051e-86	0.159459	0.376	0.223	4.20871e-82	0	LASP1
DPM1	1.51457e-86	0.184623	0.492	0.321	4.45601e-82	0	DPM1
RAB3GAP2	1.64198e-86	0.42144	0.779	0.57	4.83086e-82	0	RAB3GAP2
GOLGA2	2.19437e-86	0.29656	0.392	0.226	6.45607e-82	0	GOLGA2
VMP1	2.22445e-86	0.421631	0.753	0.541	6.54455e-82	0	VMP1
PGP	2.9756e-86	0.210614	0.532	0.348	8.75452e-82	0	PGP
RAP1GAP	3.00046e-86	0.132572	0.601	0.422	8.82766e-82	0	RAP1GAP
TRIM26	3.23194e-86	0.126811	0.389	0.241	9.5087e-82	0	TRIM26
LINS1	3.52992e-86	0.296416	0.353	0.197	1.03854e-81	0	LINS1
XKR4	3.65579e-86	0.212243	0.991	0.943	1.07557e-81	0	XKR4
AC009554.1	3.7483e-86	0.800205	0.364	0.181	1.10279e-81	0	AC009554.1
FAM118B	3.75651e-86	0.442226	0.317	0.164	1.1052e-81	0	FAM118B
CKAP5	4.02654e-86	0.161376	0.709	0.518	1.18465e-81	0	CKAP5
MFN1	4.34972e-86	0.160584	0.739	0.553	1.27973e-81	0	MFN1
ACTR1B	5.04176e-86	0.429223	0.368	0.201	1.48334e-81	0	ACTR1B
CLSTN3	5.13867e-86	0.338955	0.663	0.456	1.51185e-81	0	CLSTN3
LINC01277	5.46045e-86	0.461234	0.385	0.212	1.60652e-81	0	LINC01277
AAGAB	6.07221e-86	0.142831	0.448	0.289	1.7865e-81	0	AAGAB
UBE2G2	6.31467e-86	0.153389	0.65	0.47	1.85784e-81	0	UBE2G2
BNIP3	6.40902e-86	0.29666	0.437	0.264	1.8856e-81	0	BNIP3
OGA	6.46645e-86	0.435754	0.886	0.729	1.9025e-81	0	OGA
APPBP2	6.54785e-86	0.105922	0.73	0.549	1.92644e-81	0	APPBP2
BLVRA	6.84127e-86	0.478163	0.289	0.141	2.01277e-81	0	BLVRA
SELENOI	7.42747e-86	0.312855	0.552	0.36	2.18524e-81	0	SELENOI
ATP6V0A2	8.16945e-86	0.232222	0.42	0.254	2.40353e-81	0	ATP6V0A2
CNST	8.92806e-86	0.191059	0.671	0.478	2.62672e-81	0	CNST
CDC123	9.2733e-86	0.232431	0.478	0.302	2.7283e-81	0	CDC123
ABCB10	9.58907e-86	0.11765	0.475	0.313	2.8212e-81	0	ABCB10
MPV17	1.10205e-85	0.395303	0.418	0.244	3.24234e-81	0	MPV17
GOLGA3	1.17288e-85	0.20527	0.609	0.423	3.45073e-81	0	GOLGA3
ENTPD3-AS1	1.63346e-85	0.327911	0.401	0.236	4.8058e-81	0	ENTPD3-AS1
DNAJC27	1.67025e-85	0.21784	0.347	0.199	4.91405e-81	0	DNAJC27
ENO4	2.00894e-85	0.522616	0.319	0.161	5.9105e-81	0	ENO4
LRP4	2.27243e-85	0.387043	0.468	0.286	6.6857e-81	0	LRP4
AP1B1	2.51555e-85	0.126688	0.415	0.26	7.40099e-81	0	AP1B1
CDYL	2.51706e-85	0.308039	0.592	0.394	7.40543e-81	0	CDYL
APTX	2.60336e-85	0.142616	0.496	0.328	7.65936e-81	0	APTX
ZZEF1	2.72889e-85	0.11053	0.707	0.525	8.02866e-81	0	ZZEF1
GTF2H3	2.7623e-85	0.132451	0.411	0.257	8.12698e-81	0	GTF2H3
MTCL1	3.75953e-85	0.102131	0.819	0.638	1.10609e-80	0	MTCL1
SRGAP2C	4.14202e-85	0.130538	0.62	0.441	1.21862e-80	0	SRGAP2C
UROS	4.17943e-85	0.355118	0.397	0.23	1.22963e-80	0	UROS
CARF	4.2796e-85	0.190869	0.404	0.244	1.2591e-80	0	CARF
DDI2	4.59402e-85	0.196304	0.464	0.295	1.35161e-80	0	DDI2
VGLL4	4.65571e-85	0.229429	0.844	0.655	1.36976e-80	0	VGLL4
TARSL2	5.12471e-85	0.329866	0.775	0.572	1.50774e-80	0	TARSL2
ARV1	5.14304e-85	0.327323	0.342	0.186	1.51313e-80	0	ARV1
ATP5MC3	5.24214e-85	0.688113	0.274	0.123	1.54229e-80	0	ATP5MC3
MPP1	5.54059e-85	0.68534	0.283	0.131	1.6301e-80	0	MPP1
AC015923.1	6.0351e-85	0.680916	0.332	0.165	1.77559e-80	0	AC015923.1
PRKAG1	6.04514e-85	0.379783	0.389	0.22	1.77854e-80	0	PRKAG1
ASAP1	6.35123e-85	0.380019	0.929	0.805	1.8686e-80	0	ASAP1
TATDN3	6.91511e-85	0.121245	0.542	0.379	2.03449e-80	0	TATDN3
CATSPER2	7.11767e-85	0.224919	0.756	0.563	2.09409e-80	0	CATSPER2
SNX18	7.28659e-85	0.478091	0.277	0.133	2.14379e-80	0	SNX18
AKAP10	7.39421e-85	0.114634	0.665	0.485	2.17545e-80	0	AKAP10
AL136317.2	7.88465e-85	0.202748	0.347	0.197	2.31974e-80	0	AL136317.2
PPWD1	8.51454e-85	0.193733	0.592	0.409	2.50506e-80	0	PPWD1
DSE	8.76239e-85	0.122817	0.582	0.404	2.57798e-80	0	DSE
AGPAT3	8.96069e-85	0.110825	0.595	0.421	2.63633e-80	0	AGPAT3
NME5	8.98836e-85	0.244101	0.617	0.426	2.64447e-80	0	NME5
RB1	9.64469e-85	0.187016	0.786	0.597	2.83756e-80	0	RB1
UBE2N	1.04536e-84	0.1251	0.536	0.369	3.07556e-80	0	UBE2N
AC027031.2	1.07839e-84	0.303599	0.274	0.138	3.17273e-80	0	AC027031.2
SYT1	1.08023e-84	0.189886	0.998	0.976	3.17813e-80	0	SYT1
CDKL5	1.14294e-84	0.458047	0.866	0.691	3.36263e-80	0	CDKL5
TPM3	1.14675e-84	0.18878	0.539	0.36	3.37386e-80	0	TPM3
IPPK	1.17398e-84	0.137897	0.381	0.233	3.45396e-80	0	IPPK
CALCOCO1	1.28139e-84	0.164133	0.54	0.364	3.76999e-80	0	CALCOCO1
ZSCAN16-AS1	1.3195e-84	0.280514	0.308	0.166	3.88212e-80	0	ZSCAN16-AS1
SZT2	1.66831e-84	0.116274	0.44	0.282	4.90833e-80	0	SZT2
ZBED5	1.7065e-84	0.126954	0.627	0.449	5.0207e-80	0	ZBED5
FAM149B1	1.77503e-84	0.103351	0.433	0.279	5.22231e-80	0	FAM149B1
TET3	1.77774e-84	0.102606	0.63	0.451	5.23027e-80	0	TET3
CDC42	1.80267e-84	0.120761	0.615	0.44	5.30364e-80	0	CDC42
MRPS30	2.20448e-84	0.421332	0.295	0.149	6.48579e-80	0	MRPS30
CYP20A1	2.34831e-84	0.207965	0.445	0.276	6.90898e-80	0	CYP20A1
ATG7	2.43507e-84	0.367717	0.916	0.762	7.1642e-80	0	ATG7
AC097103.2	2.4705e-84	0.249861	0.745	0.546	7.26847e-80	0	AC097103.2
HK1	2.51394e-84	0.13358	0.672	0.49	7.39626e-80	0	HK1
ALDH5A1	2.54028e-84	0.135068	0.523	0.352	7.47376e-80	0	ALDH5A1
FAM168B	3.27188e-84	0.252179	0.649	0.454	9.6262e-80	0	FAM168B
ABCA10	3.41478e-84	0.238848	0.822	0.63	1.00466e-79	0	ABCA10
SIRT3	3.54212e-84	0.317128	0.302	0.161	1.04213e-79	0	SIRT3
GNAI3	3.63668e-84	0.127994	0.559	0.386	1.06995e-79	0	GNAI3
DEAF1	3.73836e-84	0.161436	0.572	0.393	1.09986e-79	0	DEAF1
DDX1	3.90521e-84	0.151913	0.55	0.377	1.14895e-79	0	DDX1
PDCD6IP	4.0155e-84	0.134286	0.67	0.492	1.1814e-79	0	PDCD6IP
GALNT16	4.67215e-84	0.274144	0.431	0.259	1.37459e-79	0	GALNT16
PPA1	4.72628e-84	0.248409	0.453	0.282	1.39052e-79	0	PPA1
CREBZF	6.90822e-84	0.238797	0.576	0.389	2.03247e-79	0	CREBZF
ACBD5	7.24614e-84	0.161519	0.479	0.311	2.13189e-79	0	ACBD5
RABL2B	8.37587e-84	0.487005	0.327	0.17	2.46426e-79	0	RABL2B
COA1	8.39988e-84	0.345994	0.813	0.614	2.47133e-79	0	COA1
STK36	9.99967e-84	0.493256	0.305	0.151	2.942e-79	0	STK36
SCRN3	1.04414e-83	0.144199	0.399	0.248	3.07196e-79	0	SCRN3
FAM96A	1.07093e-83	0.387324	0.289	0.148	3.15079e-79	0	FAM96A
SGPP2	1.12277e-83	0.533142	0.341	0.177	3.3033e-79	0	SGPP2
GPD1L	1.17453e-83	0.110154	0.435	0.283	3.4556e-79	0	GPD1L
FAM216A	1.2603e-83	0.326102	0.42	0.249	3.70793e-79	0	FAM216A
EDRF1	1.26749e-83	0.130102	0.486	0.322	3.7291e-79	0	EDRF1
RIOK3	1.28653e-83	0.129021	0.471	0.312	3.7851e-79	0	RIOK3
ADGRB3	1.36974e-83	0.191187	0.998	0.997	4.02991e-79	0	ADGRB3
IKZF4	1.49909e-83	0.263013	0.38	0.223	4.41048e-79	0	IKZF4
ACAT1	1.50765e-83	0.153937	0.546	0.371	4.43567e-79	0	ACAT1
DGKE	1.54494e-83	0.32141	0.747	0.541	4.54536e-79	0	DGKE
ASPSCR1	1.67375e-83	0.421351	0.3	0.154	4.92433e-79	0	ASPSCR1
COX7A2L	1.77858e-83	0.103902	0.421	0.268	5.23276e-79	0	COX7A2L
MECR	2.25763e-83	0.371707	0.317	0.166	6.64219e-79	0	MECR
MROH8	2.35031e-83	0.288525	0.383	0.221	6.91485e-79	0	MROH8
SMIM14	2.53007e-83	0.178099	0.657	0.472	7.44373e-79	0	SMIM14
DNM3	2.76556e-83	0.27682	0.981	0.943	8.13656e-79	0	DNM3
MAP3K4	2.86888e-83	0.158181	0.779	0.591	8.44053e-79	0	MAP3K4
ITGB1BP1	2.90831e-83	0.125724	0.592	0.419	8.55655e-79	0	ITGB1BP1
L2HGDH	2.92117e-83	0.1262	0.705	0.523	8.59437e-79	0	L2HGDH
C4orf47	3.35509e-83	0.369011	0.334	0.183	9.871e-79	0	C4orf47
CATSPERE	3.52162e-83	0.310477	0.283	0.143	1.0361e-78	0	CATSPERE
SNX14	3.96481e-83	0.164883	0.761	0.575	1.16649e-78	0	SNX14
45546	4.05804e-83	0.11994	0.855	0.678	1.19392e-78	0	45546
PSD3	4.35749e-83	0.125536	0.742	0.557	1.28202e-78	0	PSD3
TMEM242	5.00315e-83	0.222787	0.393	0.235	1.47198e-78	0	TMEM242
SLC25A24	5.57178e-83	0.351075	0.33	0.175	1.63927e-78	0	SLC25A24
HMOX2	6.23808e-83	0.409278	0.354	0.192	1.8353e-78	0	HMOX2
AL596220.1	6.45945e-83	0.204999	0.594	0.415	1.90044e-78	0	AL596220.1
GNPDA1	8.32518e-83	0.48524	0.285	0.139	2.44935e-78	0	GNPDA1
AC097662.1	8.40502e-83	0.60448	0.309	0.149	2.47284e-78	0	AC097662.1
GOT2	9.03055e-83	0.310426	0.435	0.266	2.65688e-78	0	GOT2
RFX3-AS1	9.3258e-83	0.212325	0.452	0.285	2.74374e-78	0	RFX3-AS1
ZNF141	9.62222e-83	0.208664	0.499	0.326	2.83095e-78	0	ZNF141
MAP7D2	1.05432e-82	0.132095	0.708	0.524	3.1019e-78	0	MAP7D2
ZNF800	1.07089e-82	0.137008	0.549	0.376	3.15065e-78	0	ZNF800
AC016705.2	1.25109e-82	0.626633	0.261	0.118	3.68082e-78	0	AC016705.2
AC058791.1	1.27166e-82	0.750575	0.291	0.135	3.74136e-78	0	AC058791.1
MPHOSPH9	1.27245e-82	0.237729	0.801	0.607	3.74368e-78	0	MPHOSPH9
FAXC	1.31979e-82	0.14654	0.698	0.518	3.88297e-78	0	FAXC
BMPR1A	1.60632e-82	0.323091	0.806	0.61	4.72594e-78	0	BMPR1A
ORC5	1.93134e-82	0.16409	0.542	0.366	5.68218e-78	0	ORC5
ADHFE1	2.05936e-82	0.344299	0.305	0.16	6.05884e-78	0	ADHFE1
MFSD8	2.09318e-82	0.118218	0.5	0.338	6.15835e-78	0	MFSD8
ECI2	2.18586e-82	0.329194	0.278	0.141	6.43101e-78	0	ECI2
GDAP1L1	2.48737e-82	0.208035	0.48	0.311	7.3181e-78	0	GDAP1L1
ZNF438	2.54576e-82	0.101864	0.681	0.508	7.48988e-78	0	ZNF438
NPHP4	3.04433e-82	0.149165	0.496	0.331	8.95672e-78	0	NPHP4
SLC30A6	3.05749e-82	0.278215	0.499	0.323	8.99544e-78	0	SLC30A6
SNAP25-AS1	3.16986e-82	0.49557	0.646	0.435	9.32605e-78	0	SNAP25-AS1
CTSA	3.21921e-82	0.405745	0.312	0.161	9.47124e-78	0	CTSA
CACNG2	3.29945e-82	0.290146	0.889	0.714	9.70731e-78	0	CACNG2
RNF175	3.34964e-82	0.174779	0.745	0.56	9.85497e-78	0	RNF175
PTPRS	3.50884e-82	0.349511	0.89	0.72	1.03233e-77	0	PTPRS
UHRF2	4.75764e-82	0.148806	0.68	0.499	1.39974e-77	0	UHRF2
SLC41A3	5.72515e-82	0.240895	0.388	0.234	1.6844e-77	0	SLC41A3
IDE	6.03213e-82	0.216496	0.598	0.412	1.77471e-77	0	IDE
POLR2H	6.10239e-82	0.550256	0.272	0.129	1.79538e-77	0	POLR2H
CCDC40	6.22272e-82	0.503948	0.291	0.143	1.83079e-77	0	CCDC40
INPP1	6.38781e-82	0.156736	0.472	0.31	1.87936e-77	0	INPP1
FLYWCH1	6.42324e-82	0.157441	0.481	0.315	1.88978e-77	0	FLYWCH1
NDUFB1	6.99549e-82	0.360784	0.335	0.183	2.05814e-77	0	NDUFB1
SLC4A1AP	7.52666e-82	0.170019	0.377	0.228	2.21442e-77	0	SLC4A1AP
NAA35	8.12263e-82	0.142029	0.696	0.514	2.38976e-77	0	NAA35
PIN1	9.14877e-82	0.244804	0.384	0.227	2.69166e-77	0	PIN1
ANO10	1.01508e-81	0.131242	0.816	0.638	2.98647e-77	0	ANO10
RPL34-AS1	1.0244e-81	0.698265	0.268	0.12	3.01388e-77	0	RPL34-AS1
GMDS-DT	1.0728e-81	0.304434	0.777	0.578	3.1563e-77	0	GMDS-DT
ERCC4	1.17248e-81	0.261829	0.353	0.202	3.44956e-77	0	ERCC4
AC106791.1	1.18795e-81	0.372242	0.513	0.323	3.49507e-77	0	AC106791.1
TIMMDC1	1.33941e-81	0.189557	0.375	0.229	3.94067e-77	0	TIMMDC1
TMEM243	1.43841e-81	0.471391	0.264	0.126	4.23194e-77	0	TMEM243
PKD1	1.58154e-81	0.213778	0.758	0.57	4.65306e-77	0	PKD1
DNA2	1.59466e-81	0.312102	0.342	0.192	4.69163e-77	0	DNA2
CFAP70	1.94147e-81	0.155689	0.503	0.337	5.71201e-77	0	CFAP70
TOM1	2.14465e-81	0.20793	0.354	0.207	6.30978e-77	0	TOM1
CWC27	2.2698e-81	0.289327	0.803	0.609	6.67799e-77	0	CWC27
HGSNAT	2.35896e-81	0.246884	0.723	0.528	6.94029e-77	0	HGSNAT
SAT2	2.50958e-81	0.29278	0.358	0.204	7.38344e-77	0	SAT2
STMP1	3.24909e-81	0.380081	0.383	0.216	9.55915e-77	0	STMP1
AC091948.1	3.28873e-81	0.359201	0.59	0.393	9.67576e-77	0	AC091948.1
C17orf75	3.38963e-81	0.519442	0.319	0.163	9.97264e-77	0	C17orf75
LRP11	3.63907e-81	0.139223	0.483	0.322	1.07065e-76	0	LRP11
AGBL1	3.78412e-81	1.13152	0.313	0.141	1.11333e-76	0	AGBL1
TRAPPC12	3.82279e-81	0.246054	0.82	0.63	1.1247e-76	0	TRAPPC12
MAGED1	3.90051e-81	0.269638	0.834	0.647	1.14757e-76	0	MAGED1
URGCP	4.11824e-81	0.115209	0.46	0.303	1.21163e-76	0	URGCP
ADPGK	4.66333e-81	0.297368	0.322	0.178	1.372e-76	0	ADPGK
STRADB	5.04528e-81	0.341984	0.415	0.249	1.48437e-76	0	STRADB
ATG10	5.12779e-81	0.211204	0.604	0.419	1.50865e-76	0	ATG10
RSAD1	5.7111e-81	0.499463	0.265	0.127	1.68026e-76	0	RSAD1
RNASEH2B	6.67722e-81	0.200437	0.518	0.345	1.9645e-76	0	RNASEH2B
DENND4C	6.71754e-81	0.228501	0.782	0.593	1.97637e-76	0	DENND4C
TPD52L2	7.26668e-81	0.107137	0.432	0.279	2.13793e-76	0	TPD52L2
RMND5B	7.43763e-81	0.229713	0.371	0.22	2.18823e-76	0	RMND5B
SLC44A1	7.76696e-81	0.293684	0.821	0.628	2.28512e-76	0	SLC44A1
ACTR2	8.24466e-81	0.265815	0.717	0.52	2.42566e-76	0	ACTR2
LINC00240	8.35439e-81	0.690046	0.277	0.128	2.45794e-76	0	LINC00240
PHTF1	8.48983e-81	0.171035	0.708	0.523	2.49779e-76	0	PHTF1
LRRN1	8.57201e-81	0.231425	0.525	0.346	2.52197e-76	0	LRRN1
YARS	8.70092e-81	0.10151	0.52	0.357	2.5599e-76	0	YARS
AL512625.3	8.76359e-81	0.461236	0.339	0.181	2.57834e-76	0	AL512625.3
GFM2	9.08098e-81	0.190822	0.456	0.295	2.67172e-76	0	GFM2
ZBTB7A	9.13055e-81	0.190662	0.54	0.364	2.6863e-76	0	ZBTB7A
CCDC91	9.60616e-81	0.309607	0.935	0.805	2.82623e-76	0	CCDC91
ANKRD10	1.00886e-80	0.139911	0.756	0.579	2.96818e-76	0	ANKRD10
SNX29	1.02187e-80	0.285748	0.766	0.57	3.00643e-76	0	SNX29
TRAK1	1.06985e-80	0.274121	0.789	0.596	3.14761e-76	0	TRAK1
SLC38A7	1.63354e-80	0.320202	0.337	0.189	4.80604e-76	0	SLC38A7
CIAPIN1	1.81365e-80	0.493559	0.312	0.16	5.33595e-76	0	CIAPIN1
AC073167.1	1.81429e-80	0.90582	0.306	0.143	5.33783e-76	0	AC073167.1
TDP1	1.89463e-80	0.119812	0.394	0.247	5.57419e-76	0	TDP1
UMAD1	1.93135e-80	0.347071	0.887	0.719	5.68224e-76	0	UMAD1
PMM2	2.132e-80	0.312707	0.398	0.235	6.27255e-76	0	PMM2
COQ6	2.15837e-80	0.614191	0.255	0.117	6.35014e-76	0	COQ6
MRPS11	2.3044e-80	0.541697	0.284	0.138	6.77977e-76	0	MRPS11
[truncated: 22,310 more rows]

## Sheet: Human IN DEGs No v FTD
	p_val	avg_log2FC	pct.1	pct.2	p_val_adj
[truncated: 7,606 more rows]
